# Supplementary material for: High resolution crystal structures of the receptor-binding domain of Clostridium botulinum neurotoxin serotypes A and FA
Source: PeerJ. 2018 Mar 21;6:e4552. doi: 10.7717/peerj.4552 (PMC5866713; doi:10.7717/peerj.4552)
Supplement: Supplemental Information 1 [file peerj-06-4552-s001.zip]

Archive with 6 entries (6 files):
- 5MK6.pdb
- 5MK7.pdb
- 5MK8.pdb
- D_1200002584_val-report-full-annotate_P1.pdf
- D_1200002585_val-report-full-annotate_P1.pdf
- D_1200002586_val-report-full-annotate_P1.pdf
