# Supplementary material for: High resolution crystal structures of the receptor-binding domain of Clostridium botulinum neurotoxin serotypes A and FA
Source: PeerJ. 2018 Mar 21;6:e4552. doi: 10.7717/peerj.4552 (PMC5866713; doi:10.7717/peerj.4552)
Supplement: Supplemental Information 1 [file peerj-06-4552-s001.zip › 5MK6.pdb]

HEADER    TOXIN                                   02-DEC-16   5MK6              
TITLE     CRYSTAL STRUCTURE OF THE RECEPTOR-BINDING DOMAIN OF BOTULINUM         
TITLE    2 NEUROTOXIN A1 (CRYSTAL FORM 1)                                       
COMPND    MOL_ID: 1;                                                            
COMPND   2 MOLECULE: BOTULINUM NEUROTOXIN TYPE A;                               
COMPND   3 CHAIN: A;                                                            
COMPND   4 SYNONYM: BONT/A,BONTOXILYSIN-A,BOTOX;                                
COMPND   5 EC: 3.4.24.69;                                                       
COMPND   6 ENGINEERED: YES                                                      
SOURCE    MOL_ID: 1;                                                            
SOURCE   2 ORGANISM_SCIENTIFIC: CLOSTRIDIUM BOTULINUM;                          
SOURCE   3 ORGANISM_TAXID: 1491;                                                
SOURCE   4 GENE: BOTA, ATX, BNA;                                                
SOURCE   5 EXPRESSION_SYSTEM: ESCHERICHIA COLI;                                 
SOURCE   6 EXPRESSION_SYSTEM_TAXID: 562                                         
KEYWDS    BACTERIAL, TOXIN, TOXIN RECEPTOR BINDING DOMAIN, JELLY ROLL FOLD,     
KEYWDS   2 BETA TREFOIL FOLD                                                    
EXPDTA    X-RAY DIFFRACTION                                                     
AUTHOR    J.R.DAVIES,K.R.ACHARYA                                                
JRNL        AUTH   J.R.DAVIES,G.HACKETT,S.M.LIU,K.R.ACHARYA                     
JRNL        TITL   CRYSTAL STRUCTURE OF THE RECEPTOR-BINDING DOMAIN OF THE FA   
JRNL        TITL 2 HYBRID CLOSTRIDIUM BOTULINUM NEUROTOXIN                      
JRNL        REF    TO BE PUBLISHED                                              
JRNL        REFN                                                                
REMARK   2                                                                      
REMARK   2 RESOLUTION.    1.45 ANGSTROMS.                                       
REMARK   3                                                                      
REMARK   3 REFINEMENT.                                                          
REMARK   3   PROGRAM     : PHENIX (1.10.1_2155)                                 
REMARK   3   AUTHORS     : PAUL ADAMS,PAVEL AFONINE,VINCENT CHEN,IAN            
REMARK   3               : DAVIS,KRESHNA GOPAL,RALF GROSSE-KUNSTLEVE,           
REMARK   3               : LI-WEI HUNG,ROBERT IMMORMINO,TOM IOERGER,            
REMARK   3               : AIRLIE MCCOY,ERIK MCKEE,NIGEL MORIARTY,              
REMARK   3               : REETAL PAI,RANDY READ,JANE RICHARDSON,               
REMARK   3               : DAVID RICHARDSON,TOD ROMO,JIM SACCHETTINI,           
REMARK   3               : NICHOLAS SAUTER,JACOB SMITH,LAURENT                  
REMARK   3               : STORONI,TOM TERWILLIGER,PETER ZWART                  
REMARK   3                                                                      
REMARK   3    REFINEMENT TARGET : NULL                                          
REMARK   3                                                                      
REMARK   3  DATA USED IN REFINEMENT.                                            
REMARK   3   RESOLUTION RANGE HIGH (ANGSTROMS) : 1.45                           
REMARK   3   RESOLUTION RANGE LOW  (ANGSTROMS) : 24.05                          
REMARK   3   MIN(FOBS/SIGMA_FOBS)              : 1.340                          
REMARK   3   COMPLETENESS FOR RANGE        (%) : 95.3                           
REMARK   3   NUMBER OF REFLECTIONS             : 78664                          
REMARK   3                                                                      
REMARK   3  FIT TO DATA USED IN REFINEMENT.                                     
REMARK   3   R VALUE     (WORKING + TEST SET) : 0.178                           
REMARK   3   R VALUE            (WORKING SET) : 0.177                           
REMARK   3   FREE R VALUE                     : 0.221                           
REMARK   3   FREE R VALUE TEST SET SIZE   (%) : 2.520                           
REMARK   3   FREE R VALUE TEST SET COUNT      : 1985                            
REMARK   3                                                                      
REMARK   3  FIT TO DATA USED IN REFINEMENT (IN BINS).                           
REMARK   3   BIN  RESOLUTION RANGE  COMPL.    NWORK NFREE   RWORK  RFREE        
REMARK   3     1 24.0508 -  3.4914    0.90     5474   131  0.1551 0.1681        
REMARK   3     2  3.4914 -  2.7726    0.93     5457   132  0.1684 0.2031        
REMARK   3     3  2.7726 -  2.4225    0.94     5474   129  0.1707 0.2142        
REMARK   3     4  2.4225 -  2.2012    0.96     5490   126  0.1629 0.1992        
REMARK   3     5  2.2012 -  2.0435    0.95     5491   139  0.1562 0.2383        
REMARK   3     6  2.0435 -  1.9230    0.94     5392   152  0.1618 0.2400        
REMARK   3     7  1.9230 -  1.8268    0.97     5490   153  0.1737 0.2417        
REMARK   3     8  1.8268 -  1.7473    0.97     5541   137  0.1804 0.2442        
REMARK   3     9  1.7473 -  1.6800    0.97     5531   160  0.1979 0.2638        
REMARK   3    10  1.6800 -  1.6221    0.96     5473   120  0.2191 0.2704        
REMARK   3    11  1.6221 -  1.5714    0.97     5444   160  0.2332 0.2941        
REMARK   3    12  1.5714 -  1.5265    0.97     5486   159  0.2437 0.2696        
REMARK   3    13  1.5265 -  1.4863    0.97     5495   154  0.2710 0.2959        
REMARK   3    14  1.4863 -  1.4500    0.95     5441   133  0.3164 0.3852        
REMARK   3                                                                      
REMARK   3  BULK SOLVENT MODELLING.                                             
REMARK   3   METHOD USED        : NULL                                          
REMARK   3   SOLVENT RADIUS     : 1.11                                          
REMARK   3   SHRINKAGE RADIUS   : 0.90                                          
REMARK   3   K_SOL              : NULL                                          
REMARK   3   B_SOL              : NULL                                          
REMARK   3                                                                      
REMARK   3  ERROR ESTIMATES.                                                    
REMARK   3   COORDINATE ERROR (MAXIMUM-LIKELIHOOD BASED)     : 0.190            
REMARK   3   PHASE ERROR (DEGREES, MAXIMUM-LIKELIHOOD BASED) : 23.030           
REMARK   3                                                                      
REMARK   3  B VALUES.                                                           
REMARK   3   FROM WILSON PLOT           (A**2) : NULL                           
REMARK   3   MEAN B VALUE      (OVERALL, A**2) : NULL                           
REMARK   3   OVERALL ANISOTROPIC B VALUE.                                       
REMARK   3    B11 (A**2) : NULL                                                 
REMARK   3    B22 (A**2) : NULL                                                 
REMARK   3    B33 (A**2) : NULL                                                 
REMARK   3    B12 (A**2) : NULL                                                 
REMARK   3    B13 (A**2) : NULL                                                 
REMARK   3    B23 (A**2) : NULL                                                 
REMARK   3                                                                      
REMARK   3  TWINNING INFORMATION.                                               
REMARK   3   FRACTION: NULL                                                     
REMARK   3   OPERATOR: NULL                                                     
REMARK   3                                                                      
REMARK   3  DEVIATIONS FROM IDEAL VALUES.                                       
REMARK   3                 RMSD          COUNT                                  
REMARK   3   BOND      :  0.002           3596                                  
REMARK   3   ANGLE     :  0.442           4883                                  
REMARK   3   CHIRALITY :  0.070            526                                  
REMARK   3   PLANARITY :  0.002            631                                  
REMARK   3   DIHEDRAL  : 13.812           1357                                  
REMARK   3                                                                      
REMARK   3  TLS DETAILS                                                         
REMARK   3   NUMBER OF TLS GROUPS  : NULL                                       
REMARK   3                                                                      
REMARK   3  NCS DETAILS                                                         
REMARK   3   NUMBER OF NCS GROUPS : NULL                                        
REMARK   3                                                                      
REMARK   3  OTHER REFINEMENT REMARKS: NULL                                      
REMARK   4                                                                      
REMARK   4 5MK6 COMPLIES WITH FORMAT V. 3.30, 13-JUL-11                         
REMARK 100                                                                      
REMARK 100 THIS ENTRY HAS BEEN PROCESSED BY PDBE ON 02-DEC-16.                  
REMARK 100 THE DEPOSITION ID IS D_1200002585.                                   
REMARK 200                                                                      
REMARK 200 EXPERIMENTAL DETAILS                                                 
REMARK 200  EXPERIMENT TYPE                : X-RAY DIFFRACTION                  
REMARK 200  DATE OF DATA COLLECTION        : 15-DEC-14                          
REMARK 200  TEMPERATURE           (KELVIN) : 100                                
REMARK 200  PH                             : 4.0                                
REMARK 200  NUMBER OF CRYSTALS USED        : 1                                  
REMARK 200                                                                      
REMARK 200  SYNCHROTRON              (Y/N) : Y                                  
REMARK 200  RADIATION SOURCE               : DIAMOND                            
REMARK 200  BEAMLINE                       : I02                                
REMARK 200  X-RAY GENERATOR MODEL          : NULL                               
REMARK 200  MONOCHROMATIC OR LAUE    (M/L) : M                                  
REMARK 200  WAVELENGTH OR RANGE        (A) : 0.97949                            
REMARK 200  MONOCHROMATOR                  : NULL                               
REMARK 200  OPTICS                         : NULL                               
REMARK 200                                                                      
REMARK 200  DETECTOR TYPE                  : PIXEL                              
REMARK 200  DETECTOR MANUFACTURER          : DECTRIS PILATUS 6M-F               
REMARK 200  INTENSITY-INTEGRATION SOFTWARE : DIALS                              
REMARK 200  DATA SCALING SOFTWARE          : AIMLESS                            
REMARK 200                                                                      
REMARK 200  NUMBER OF UNIQUE REFLECTIONS   : 78738                              
REMARK 200  RESOLUTION RANGE HIGH      (A) : 1.450                              
REMARK 200  RESOLUTION RANGE LOW       (A) : 24.050                             
REMARK 200  REJECTION CRITERIA  (SIGMA(I)) : NULL                               
REMARK 200                                                                      
REMARK 200 OVERALL.                                                             
REMARK 200  COMPLETENESS FOR RANGE     (%) : 95.9                               
REMARK 200  DATA REDUNDANCY                : 3.300                              
REMARK 200  R MERGE                    (I) : NULL                               
REMARK 200  R SYM                      (I) : NULL                               
REMARK 200  <I/SIGMA(I)> FOR THE DATA SET  : 6.9000                             
REMARK 200                                                                      
REMARK 200 IN THE HIGHEST RESOLUTION SHELL.                                     
REMARK 200  HIGHEST RESOLUTION SHELL, RANGE HIGH (A) : 1.45                     
REMARK 200  HIGHEST RESOLUTION SHELL, RANGE LOW  (A) : 4.48                     
REMARK 200  COMPLETENESS FOR SHELL     (%) : 95.1                               
REMARK 200  DATA REDUNDANCY IN SHELL       : 2.70                               
REMARK 200  R MERGE FOR SHELL          (I) : NULL                               
REMARK 200  R SYM FOR SHELL            (I) : NULL                               
REMARK 200  <I/SIGMA(I)> FOR SHELL         : 1.100                              
REMARK 200                                                                      
REMARK 200 DIFFRACTION PROTOCOL: SINGLE WAVELENGTH                              
REMARK 200 METHOD USED TO DETERMINE THE STRUCTURE: NULL                         
REMARK 200 SOFTWARE USED: PHASER                                                
REMARK 200 STARTING MODEL: NULL                                                 
REMARK 200                                                                      
REMARK 200 REMARK: NULL                                                         
REMARK 280                                                                      
REMARK 280 CRYSTAL                                                              
REMARK 280 SOLVENT CONTENT, VS   (%): 45.67                                     
REMARK 280 MATTHEWS COEFFICIENT, VM (ANGSTROMS**3/DA): 2.26                     
REMARK 280                                                                      
REMARK 280 CRYSTALLIZATION CONDITIONS: 0.1 M MIB, 25% W/V PEG 1500, PH 4.0,     
REMARK 280  VAPOR DIFFUSION, SITTING DROP, TEMPERATURE 289.15K                  
REMARK 290                                                                      
REMARK 290 CRYSTALLOGRAPHIC SYMMETRY                                            
REMARK 290 SYMMETRY OPERATORS FOR SPACE GROUP: P 21 21 21                       
REMARK 290                                                                      
REMARK 290      SYMOP   SYMMETRY                                                
REMARK 290     NNNMMM   OPERATOR                                                
REMARK 290       1555   X,Y,Z                                                   
REMARK 290       2555   -X+1/2,-Y,Z+1/2                                         
REMARK 290       3555   -X,Y+1/2,-Z+1/2                                         
REMARK 290       4555   X+1/2,-Y+1/2,-Z                                         
REMARK 290                                                                      
REMARK 290     WHERE NNN -> OPERATOR NUMBER                                     
REMARK 290           MMM -> TRANSLATION VECTOR                                  
REMARK 290                                                                      
REMARK 290 CRYSTALLOGRAPHIC SYMMETRY TRANSFORMATIONS                            
REMARK 290 THE FOLLOWING TRANSFORMATIONS OPERATE ON THE ATOM/HETATM             
REMARK 290 RECORDS IN THIS ENTRY TO PRODUCE CRYSTALLOGRAPHICALLY                
REMARK 290 RELATED MOLECULES.                                                   
REMARK 290   SMTRY1   1  1.000000  0.000000  0.000000        0.00000            
REMARK 290   SMTRY2   1  0.000000  1.000000  0.000000        0.00000            
REMARK 290   SMTRY3   1  0.000000  0.000000  1.000000        0.00000            
REMARK 290   SMTRY1   2 -1.000000  0.000000  0.000000       19.88500            
REMARK 290   SMTRY2   2  0.000000 -1.000000  0.000000        0.00000            
REMARK 290   SMTRY3   2  0.000000  0.000000  1.000000       53.80000            
REMARK 290   SMTRY1   3 -1.000000  0.000000  0.000000        0.00000            
REMARK 290   SMTRY2   3  0.000000  1.000000  0.000000       53.66000            
REMARK 290   SMTRY3   3  0.000000  0.000000 -1.000000       53.80000            
REMARK 290   SMTRY1   4  1.000000  0.000000  0.000000       19.88500            
REMARK 290   SMTRY2   4  0.000000 -1.000000  0.000000       53.66000            
REMARK 290   SMTRY3   4  0.000000  0.000000 -1.000000        0.00000            
REMARK 290                                                                      
REMARK 290 REMARK: NULL                                                         
REMARK 300                                                                      
REMARK 300 BIOMOLECULE: 1                                                       
REMARK 300 SEE REMARK 350 FOR THE AUTHOR PROVIDED AND/OR PROGRAM                
REMARK 300 GENERATED ASSEMBLY INFORMATION FOR THE STRUCTURE IN                  
REMARK 300 THIS ENTRY. THE REMARK MAY ALSO PROVIDE INFORMATION ON               
REMARK 300 BURIED SURFACE AREA.                                                 
REMARK 350                                                                      
REMARK 350 COORDINATES FOR A COMPLETE MULTIMER REPRESENTING THE KNOWN           
REMARK 350 BIOLOGICALLY SIGNIFICANT OLIGOMERIZATION STATE OF THE                
REMARK 350 MOLECULE CAN BE GENERATED BY APPLYING BIOMT TRANSFORMATIONS          
REMARK 350 GIVEN BELOW.  BOTH NON-CRYSTALLOGRAPHIC AND                          
REMARK 350 CRYSTALLOGRAPHIC OPERATIONS ARE GIVEN.                               
REMARK 350                                                                      
REMARK 350 BIOMOLECULE: 1                                                       
REMARK 350 AUTHOR DETERMINED BIOLOGICAL UNIT: MONOMERIC                         
REMARK 350 SOFTWARE DETERMINED QUATERNARY STRUCTURE: MONOMERIC                  
REMARK 350 SOFTWARE USED: PISA                                                  
REMARK 350 TOTAL BURIED SURFACE AREA: 110 ANGSTROM**2                           
REMARK 350 SURFACE AREA OF THE COMPLEX: 18520 ANGSTROM**2                       
REMARK 350 CHANGE IN SOLVENT FREE ENERGY: -8.0 KCAL/MOL                         
REMARK 350 APPLY THE FOLLOWING TO CHAINS: A                                     
REMARK 350   BIOMT1   1  1.000000  0.000000  0.000000        0.00000            
REMARK 350   BIOMT2   1  0.000000  1.000000  0.000000        0.00000            
REMARK 350   BIOMT3   1  0.000000  0.000000  1.000000        0.00000            
REMARK 465                                                                      
REMARK 465 MISSING RESIDUES                                                     
REMARK 465 THE FOLLOWING RESIDUES WERE NOT LOCATED IN THE                       
REMARK 465 EXPERIMENT. (M=MODEL NUMBER; RES=RESIDUE NAME; C=CHAIN               
REMARK 465 IDENTIFIER; SSSEQ=SEQUENCE NUMBER; I=INSERTION CODE.)                
REMARK 465                                                                      
REMARK 465   M RES C SSSEQI                                                     
REMARK 465     MET A   864                                                      
REMARK 465     HIS A   865                                                      
REMARK 465     HIS A   866                                                      
REMARK 465     HIS A   867                                                      
REMARK 465     HIS A   868                                                      
REMARK 465     HIS A   869                                                      
REMARK 465     HIS A   870                                                      
REMARK 465     LYS A   871                                                      
REMARK 465     ASN A   872                                                      
REMARK 465     ARG A  1294                                                      
REMARK 465     PRO A  1295                                                      
REMARK 465     LEU A  1296                                                      
REMARK 470                                                                      
REMARK 470 MISSING ATOM                                                         
REMARK 470 THE FOLLOWING RESIDUES HAVE MISSING ATOMS (M=MODEL NUMBER;           
REMARK 470 RES=RESIDUE NAME; C=CHAIN IDENTIFIER; SSEQ=SEQUENCE NUMBER;          
REMARK 470 I=INSERTION CODE):                                                   
REMARK 470   M RES CSSEQI  ATOMS                                                
REMARK 470     ILE A 873    CG1  CG2  CD1                                       
REMARK 470     ILE A 874    CG1  CG2  CD1                                       
REMARK 470     ARG A1276    CG   CD   NE   CZ   NH1  NH2                        
REMARK 470     LEU A1278    CG   CD1  CD2                                       
REMARK 500                                                                      
REMARK 500 GEOMETRY AND STEREOCHEMISTRY                                         
REMARK 500 SUBTOPIC: TORSION ANGLES                                             
REMARK 500                                                                      
REMARK 500 TORSION ANGLES OUTSIDE THE EXPECTED RAMACHANDRAN REGIONS:            
REMARK 500 (M=MODEL NUMBER; RES=RESIDUE NAME; C=CHAIN IDENTIFIER;               
REMARK 500 SSEQ=SEQUENCE NUMBER; I=INSERTION CODE).                             
REMARK 500                                                                      
REMARK 500 STANDARD TABLE:                                                      
REMARK 500 FORMAT:(10X,I3,1X,A3,1X,A1,I4,A1,4X,F7.2,3X,F7.2)                    
REMARK 500                                                                      
REMARK 500 EXPECTED VALUES: GJ KLEYWEGT AND TA JONES (1996). PHI/PSI-           
REMARK 500 CHOLOGY: RAMACHANDRAN REVISITED. STRUCTURE 4, 1395 - 1400            
REMARK 500                                                                      
REMARK 500  M RES CSSEQI        PSI       PHI                                   
REMARK 500    ASN A 935       88.57   -157.45                                   
REMARK 500    TYR A 980      105.92    -57.51                                   
REMARK 500    MET A1004       77.20   -100.32                                   
REMARK 500    ASN A1025     -102.62   -147.16                                   
REMARK 500    LYS A1056      138.53   -170.40                                   
REMARK 500    ASP A1076       37.31    -96.51                                   
REMARK 500    ASP A1118       77.39   -116.24                                   
REMARK 500    ASN A1127      139.44     70.65                                   
REMARK 500    ASN A1147       -0.40     74.61                                   
REMARK 500    GLN A1219      -14.31   -147.32                                   
REMARK 500    ASP A1228     -156.04   -127.52                                   
REMARK 500                                                                      
REMARK 500 REMARK: NULL                                                         
REMARK 525                                                                      
REMARK 525 SOLVENT                                                              
REMARK 525                                                                      
REMARK 525 THE SOLVENT MOLECULES HAVE CHAIN IDENTIFIERS THAT                    
REMARK 525 INDICATE THE POLYMER CHAIN WITH WHICH THEY ARE MOST                  
REMARK 525 CLOSELY ASSOCIATED. THE REMARK LISTS ALL THE SOLVENT                 
REMARK 525 MOLECULES WHICH ARE MORE THAN 5A AWAY FROM THE                       
REMARK 525 NEAREST POLYMER CHAIN (M = MODEL NUMBER;                             
REMARK 525 RES=RESIDUE NAME; C=CHAIN IDENTIFIER; SSEQ=SEQUENCE                  
REMARK 525 NUMBER; I=INSERTION CODE):                                           
REMARK 525                                                                      
REMARK 525  M RES CSSEQI                                                        
REMARK 525    HOH A1821        DISTANCE =  6.49 ANGSTROMS                       
REMARK 800                                                                      
REMARK 800 SITE                                                                 
REMARK 800 SITE_IDENTIFIER: AC1                                                 
REMARK 800 EVIDENCE_CODE: SOFTWARE                                              
REMARK 800 SITE_DESCRIPTION: binding site for residue NA A 1301                 
DBREF  5MK6 A  871  1296  UNP    P10845   BXA1_CLOBO     871   1296             
SEQADV 5MK6 MET A  864  UNP  P10845              INITIATING METHIONINE          
SEQADV 5MK6 HIS A  865  UNP  P10845              EXPRESSION TAG                 
SEQADV 5MK6 HIS A  866  UNP  P10845              EXPRESSION TAG                 
SEQADV 5MK6 HIS A  867  UNP  P10845              EXPRESSION TAG                 
SEQADV 5MK6 HIS A  868  UNP  P10845              EXPRESSION TAG                 
SEQADV 5MK6 HIS A  869  UNP  P10845              EXPRESSION TAG                 
SEQADV 5MK6 HIS A  870  UNP  P10845              EXPRESSION TAG                 
SEQRES   1 A  433  MET HIS HIS HIS HIS HIS HIS LYS ASN ILE ILE ASN THR          
SEQRES   2 A  433  SER ILE LEU ASN LEU ARG TYR GLU SER ASN HIS LEU ILE          
SEQRES   3 A  433  ASP LEU SER ARG TYR ALA SER LYS ILE ASN ILE GLY SER          
SEQRES   4 A  433  LYS VAL ASN PHE ASP PRO ILE ASP LYS ASN GLN ILE GLN          
SEQRES   5 A  433  LEU PHE ASN LEU GLU SER SER LYS ILE GLU VAL ILE LEU          
SEQRES   6 A  433  LYS ASN ALA ILE VAL TYR ASN SER MET TYR GLU ASN PHE          
SEQRES   7 A  433  SER THR SER PHE TRP ILE ARG ILE PRO LYS TYR PHE ASN          
SEQRES   8 A  433  SER ILE SER LEU ASN ASN GLU TYR THR ILE ILE ASN CYS          
SEQRES   9 A  433  MET GLU ASN ASN SER GLY TRP LYS VAL SER LEU ASN TYR          
SEQRES  10 A  433  GLY GLU ILE ILE TRP THR LEU GLN ASP THR GLN GLU ILE          
SEQRES  11 A  433  LYS GLN ARG VAL VAL PHE LYS TYR SER GLN MET ILE ASN          
SEQRES  12 A  433  ILE SER ASP TYR ILE ASN ARG TRP ILE PHE VAL THR ILE          
SEQRES  13 A  433  THR ASN ASN ARG LEU ASN ASN SER LYS ILE TYR ILE ASN          
SEQRES  14 A  433  GLY ARG LEU ILE ASP GLN LYS PRO ILE SER ASN LEU GLY          
SEQRES  15 A  433  ASN ILE HIS ALA SER ASN ASN ILE MET PHE LYS LEU ASP          
SEQRES  16 A  433  GLY CYS ARG ASP THR HIS ARG TYR ILE TRP ILE LYS TYR          
SEQRES  17 A  433  PHE ASN LEU PHE ASP LYS GLU LEU ASN GLU LYS GLU ILE          
SEQRES  18 A  433  LYS ASP LEU TYR ASP ASN GLN SER ASN SER GLY ILE LEU          
SEQRES  19 A  433  LYS ASP PHE TRP GLY ASP TYR LEU GLN TYR ASP LYS PRO          
SEQRES  20 A  433  TYR TYR MET LEU ASN LEU TYR ASP PRO ASN LYS TYR VAL          
SEQRES  21 A  433  ASP VAL ASN ASN VAL GLY ILE ARG GLY TYR MET TYR LEU          
SEQRES  22 A  433  LYS GLY PRO ARG GLY SER VAL MET THR THR ASN ILE TYR          
SEQRES  23 A  433  LEU ASN SER SER LEU TYR ARG GLY THR LYS PHE ILE ILE          
SEQRES  24 A  433  LYS LYS TYR ALA SER GLY ASN LYS ASP ASN ILE VAL ARG          
SEQRES  25 A  433  ASN ASN ASP ARG VAL TYR ILE ASN VAL VAL VAL LYS ASN          
SEQRES  26 A  433  LYS GLU TYR ARG LEU ALA THR ASN ALA SER GLN ALA GLY          
SEQRES  27 A  433  VAL GLU LYS ILE LEU SER ALA LEU GLU ILE PRO ASP VAL          
SEQRES  28 A  433  GLY ASN LEU SER GLN VAL VAL VAL MET LYS SER LYS ASN          
SEQRES  29 A  433  ASP GLN GLY ILE THR ASN LYS CYS LYS MET ASN LEU GLN          
SEQRES  30 A  433  ASP ASN ASN GLY ASN ASP ILE GLY PHE ILE GLY PHE HIS          
SEQRES  31 A  433  GLN PHE ASN ASN ILE ALA LYS LEU VAL ALA SER ASN TRP          
SEQRES  32 A  433  TYR ASN ARG GLN ILE GLU ARG SER SER ARG THR LEU GLY          
SEQRES  33 A  433  CYS SER TRP GLU PHE ILE PRO VAL ASP ASP GLY TRP GLY          
SEQRES  34 A  433  GLU ARG PRO LEU                                              
HET     NA  A1301       1                                                       
HETNAM      NA SODIUM ION                                                       
FORMUL   2   NA    NA 1+                                                        
FORMUL   3  HOH   *421(H2 O)                                                    
HELIX    1 AA1 ILE A  873  SER A  877  5                                   5    
HELIX    2 AA2 LYS A  929  VAL A  933  5                                   5    
HELIX    3 AA3 ASN A  954  LEU A  958  5                                   5    
HELIX    4 AA4 ASN A 1080  GLN A 1091  1                                  12    
HELIX    5 AA5 GLU A 1210  VAL A 1214  5                                   5    
HELIX    6 AA6 ASN A 1265  ARG A 1273  1                                   9    
SHEET    1 AA1 5 HIS A 887  ASP A 890  0                                        
SHEET    2 AA1 5 LEU A 879  GLU A 884 -1  N  ARG A 882   O  ILE A 889           
SHEET    3 AA1 5 TYR A1066  PHE A1075 -1  O  LEU A1074   N  LEU A 879           
SHEET    4 AA1 5 ILE A 914  PHE A 917 -1  N  ILE A 914   O  ILE A1069           
SHEET    5 AA1 5 VAL A 904  PHE A 906 -1  N  ASN A 905   O  GLN A 915           
SHEET    1 AA2 7 HIS A 887  ASP A 890  0                                        
SHEET    2 AA2 7 LEU A 879  GLU A 884 -1  N  ARG A 882   O  ILE A 889           
SHEET    3 AA2 7 TYR A1066  PHE A1075 -1  O  LEU A1074   N  LEU A 879           
SHEET    4 AA2 7 PHE A 941  ARG A 948 -1  N  SER A 942   O  PHE A1075           
SHEET    5 AA2 7 ILE A1015  ASN A1021 -1  O  VAL A1017   N  PHE A 945           
SHEET    6 AA2 7 ASN A1026  ILE A1031 -1  O  TYR A1030   N  THR A1018           
SHEET    7 AA2 7 ARG A1034  PRO A1040 -1  O  LYS A1039   N  SER A1027           
SHEET    1 AA3 7 LYS A 897  ILE A 900  0                                        
SHEET    2 AA3 7 ILE A 924  ILE A 927 -1  O  GLU A 925   N  ASN A 899           
SHEET    3 AA3 7 ASN A1052  ASP A1058 -1  O  PHE A1055   N  ILE A 924           
SHEET    4 AA3 7 TYR A 962  GLU A 969 -1  N  THR A 963   O  ASP A1058           
SHEET    5 AA3 7 SER A 972  ASN A 979 -1  O  VAL A 976   N  ILE A 965           
SHEET    6 AA3 7 GLU A 982  GLN A 988 -1  O  ILE A 984   N  SER A 977           
SHEET    7 AA3 7 LYS A 994  LYS A1000 -1  O  GLN A 995   N  LEU A 987           
SHEET    1 AA4 2 ASN A 935  SER A 936  0                                        
SHEET    2 AA4 2 ILE A1047  HIS A1048 -1  O  ILE A1047   N  SER A 936           
SHEET    1 AA5 2 TYR A1112  ASN A1115  0                                        
SHEET    2 AA5 2 TRP A1282  ILE A1285 -1  O  ILE A1285   N  TYR A1112           
SHEET    1 AA6 8 TYR A1122  ASN A1126  0                                        
SHEET    2 AA6 8 TYR A1133  LYS A1137 -1  O  TYR A1133   N  ASN A1126           
SHEET    3 AA6 8 ILE A1258  SER A1264 -1  O  ALA A1259   N  LEU A1136           
SHEET    4 AA6 8 ASP A1246  PHE A1255 -1  N  GLY A1251   O  VAL A1262           
SHEET    5 AA6 8 LYS A1234  GLN A1240 -1  N  LEU A1239   O  ILE A1247           
SHEET    6 AA6 8 VAL A1220  LYS A1226 -1  N  VAL A1220   O  GLN A1240           
SHEET    7 AA6 8 ARG A1179  VAL A1185 -1  N  VAL A1180   O  VAL A1221           
SHEET    8 AA6 8 LYS A1204  ILE A1205  0                                        
SHEET    1 AA7 8 PHE A1160  LYS A1164  0                                        
SHEET    2 AA7 8 ARG A1179  VAL A1185 -1  O  ASN A1183   N  ILE A1161           
SHEET    3 AA7 8 VAL A1220  LYS A1226 -1  O  VAL A1221   N  VAL A1180           
SHEET    4 AA7 8 LYS A1234  GLN A1240 -1  O  GLN A1240   N  VAL A1220           
SHEET    5 AA7 8 ASP A1246  PHE A1255 -1  O  ILE A1247   N  LEU A1239           
SHEET    6 AA7 8 ILE A1258  SER A1264 -1  O  VAL A1262   N  GLY A1251           
SHEET    7 AA7 8 GLU A1190  ALA A1194  0                                        
SHEET    8 AA7 8 SER A1207  LEU A1209 -1  O  LEU A1209   N  ARG A1192           
SHEET    1 AA8 2 SER A1142  THR A1145  0                                        
SHEET    2 AA8 2 TYR A1149  SER A1152 -1  O  ASN A1151   N  VAL A1143           
LINK        NA    NA A1301                 O   HOH A1764     1555   1555  3.09  
CISPEP   1 GLY A 1138    PRO A 1139          0        -0.42                     
SITE     1 AC1  5 ASN A1127  ARG A1131  ASN A1183  ARG A1192                    
SITE     2 AC1  5 HOH A1764                                                     
CRYST1   39.770  107.320  107.600  90.00  90.00  90.00 P 21 21 21    4          
ORIGX1      1.000000  0.000000  0.000000        0.00000                         
ORIGX2      0.000000  1.000000  0.000000        0.00000                         
ORIGX3      0.000000  0.000000  1.000000        0.00000                         
SCALE1      0.025145  0.000000  0.000000        0.00000                         
SCALE2      0.000000  0.009318  0.000000        0.00000                         
SCALE3      0.000000  0.000000  0.009294        0.00000                         
ATOM      1  N   ILE A 873      47.519 102.017  15.877  1.00 46.82           N  
ANISOU    1  N   ILE A 873     6796   6793   4199  -1745    892   -303       N  
ATOM      2  CA  ILE A 873      47.548 102.893  14.711  1.00 47.45           C  
ANISOU    2  CA  ILE A 873     6928   6817   4285  -1602    997   -346       C  
ATOM      3  C   ILE A 873      48.736 103.847  14.773  1.00 48.07           C  
ANISOU    3  C   ILE A 873     7503   6712   4052  -1227    768   -218       C  
ATOM      4  O   ILE A 873      49.387 104.107  13.760  1.00 48.37           O  
ANISOU    4  O   ILE A 873     7564   6771   4042   -946    604   -156       O  
ATOM      5  CB  ILE A 873      46.245 103.670  14.598  1.00 44.74           C  
ANISOU    5  CB  ILE A 873     5752   6847   4402  -1604   1207   -377       C  
ATOM      6  N   ILE A 874      49.011 104.368  15.971  1.00 47.20           N  
ANISOU    6  N   ILE A 874     7767   6416   3750   -859    882   -147       N  
ATOM      7  CA  ILE A 874      50.127 105.295  16.136  1.00 45.18           C  
ANISOU    7  CA  ILE A 874     7745   6029   3393   -692    907    167       C  
ATOM      8  C   ILE A 874      51.460 104.611  15.858  1.00 44.56           C  
ANISOU    8  C   ILE A 874     8115   5643   3174   -695    675    572       C  
ATOM      9  O   ILE A 874      52.376 105.224  15.299  1.00 45.58           O  
ANISOU    9  O   ILE A 874     8313   5725   3280   -908    317    718       O  
ATOM     10  CB  ILE A 874      50.108 105.897  17.541  1.00 45.28           C  
ANISOU   10  CB  ILE A 874     7867   5995   3343   -586   1054     27       C  
ATOM     11  N   ASN A 875      51.587 103.338  16.242  1.00 43.55           N  
ANISOU   11  N   ASN A 875     8412   5111   3024   -189    787    813       N  
ATOM     12  CA  ASN A 875      52.806 102.593  15.954  1.00 44.89           C  
ANISOU   12  CA  ASN A 875     9008   4850   3197     44    421    868       C  
ATOM     13  C   ASN A 875      52.964 102.297  14.469  1.00 43.91           C  
ANISOU   13  C   ASN A 875     8937   4506   3241   -130    227    629       C  
ATOM     14  O   ASN A 875      54.086 102.044  14.016  1.00 46.10           O  
ANISOU   14  O   ASN A 875     9276   4781   3460     46    -64    681       O  
ATOM     15  CB  ASN A 875      52.834 101.291  16.757  1.00 48.65           C  
ANISOU   15  CB  ASN A 875    10009   5151   3326    375    395    889       C  
ATOM     16  CG  ASN A 875      52.954 101.529  18.249  1.00 52.14           C  
ANISOU   16  CG  ASN A 875    10891   5337   3583    649    108    776       C  
ATOM     17  OD1 ASN A 875      53.635 102.456  18.689  1.00 53.24           O  
ANISOU   17  OD1 ASN A 875    11040   5351   3839    975   -155    881       O  
ATOM     18  ND2 ASN A 875      52.293 100.689  19.037  1.00 53.15           N  
ANISOU   18  ND2 ASN A 875    11220   5490   3484    745    155    692       N  
ATOM     19  N   THR A 876      51.875 102.323  13.705  1.00 42.37           N  
ANISOU   19  N   THR A 876     8908   4066   3123   -734    205    302       N  
ATOM     20  CA  THR A 876      51.916 102.077  12.271  1.00 42.48           C  
ANISOU   20  CA  THR A 876     9006   4073   3063  -1063    127    -51       C  
ATOM     21  C   THR A 876      52.063 103.353  11.453  1.00 40.41           C  
ANISOU   21  C   THR A 876     8757   3757   2842  -1363     74   -262       C  
ATOM     22  O   THR A 876      52.184 103.273  10.226  1.00 42.01           O  
ANISOU   22  O   THR A 876     9321   3653   2987  -2102   -454   -333       O  
ATOM     23  CB  THR A 876      50.654 101.328  11.827  1.00 44.83           C  
ANISOU   23  CB  THR A 876     9345   4388   3299   -757     47   -264       C  
ATOM     24  OG1 THR A 876      49.516 102.189  11.956  1.00 44.64           O  
ANISOU   24  OG1 THR A 876     8764   4638   3560   -500    -23   -482       O  
ATOM     25  CG2 THR A 876      50.442 100.089  12.683  1.00 45.85           C  
ANISOU   25  CG2 THR A 876     9722   4423   3278   -366   -241   -185       C  
ATOM     26  N   SER A 877      52.057 104.517  12.095  1.00 32.87           N  
ANISOU   26  N   SER A 877     6668   3584   2237   -962    260   -435       N  
ATOM     27  CA  SER A 877      52.144 105.776  11.370  1.00 26.74           C  
ANISOU   27  CA  SER A 877     4824   3428   1909   -101   -116   -282       C  
ATOM     28  C   SER A 877      53.525 105.946  10.746  1.00 23.41           C  
ANISOU   28  C   SER A 877     4180   3106   1608    435   -468   -213       C  
ATOM     29  O   SER A 877      54.538 105.494  11.286  1.00 24.97           O  
ANISOU   29  O   SER A 877     4415   3323   1751    790   -824    254       O  
ATOM     30  CB  SER A 877      51.857 106.947  12.310  1.00 22.49           C  
ANISOU   30  CB  SER A 877     2996   3818   1731    -13   -131     43       C  
ATOM     31  OG  SER A 877      52.826 107.025  13.341  1.00 23.53           O  
ANISOU   31  OG  SER A 877     3516   3872   1552   -368    173    -14       O  
ATOM     32  N   ILE A 878      53.554 106.607   9.584  1.00 20.09           N  
ANISOU   32  N   ILE A 878     3707   2606   1321    374    100   -291       N  
ATOM     33  CA  ILE A 878      54.814 106.874   8.892  1.00 16.16           C  
ANISOU   33  CA  ILE A 878     2577   2312   1251    -26     23   -564       C  
ATOM     34  C   ILE A 878      55.500 108.138   9.390  1.00 14.68           C  
ANISOU   34  C   ILE A 878     1957   2384   1236   -260    -64   -711       C  
ATOM     35  O   ILE A 878      56.641 108.412   8.986  1.00 17.23           O  
ANISOU   35  O   ILE A 878     2420   2681   1446   -372      2   -670       O  
ATOM     36  CB  ILE A 878      54.630 106.891   7.361  1.00 18.59           C  
ANISOU   36  CB  ILE A 878     3452   2386   1226    -27   -349   -670       C  
ATOM     37  CG1 ILE A 878      53.649 107.990   6.950  1.00 18.48           C  
ANISOU   37  CG1 ILE A 878     3549   2419   1055    178    162   -466       C  
ATOM     38  CG2 ILE A 878      54.150 105.533   6.871  1.00 21.52           C  
ANISOU   38  CG2 ILE A 878     4095   2516   1564   -122   -279   -855       C  
ATOM     39  CD1 ILE A 878      53.428 108.082   5.454  1.00 18.47           C  
ANISOU   39  CD1 ILE A 878     3324   2626   1068   -132    398   -516       C  
ATOM     40  N   LEU A 879      54.843 108.917  10.245  1.00 16.40           N  
ANISOU   40  N   LEU A 879     2964   1975   1291     54    258   -782       N  
ATOM     41  CA  LEU A 879      55.457 110.074  10.887  1.00 16.65           C  
ANISOU   41  CA  LEU A 879     3230   2062   1035    285    291   -419       C  
ATOM     42  C   LEU A 879      54.798 110.234  12.246  1.00 16.12           C  
ANISOU   42  C   LEU A 879     2877   2204   1042    705    322   -314       C  
ATOM     43  O   LEU A 879      53.579 110.412  12.324  1.00 16.54           O  
ANISOU   43  O   LEU A 879     2699   2673    913    213    121   -356       O  
ATOM     44  CB  LEU A 879      55.264 111.337  10.045  1.00 16.26           C  
ANISOU   44  CB  LEU A 879     2562   2299   1317    155    -11   -234       C  
ATOM     45  CG  LEU A 879      55.726 112.656  10.672  1.00 16.53           C  
ANISOU   45  CG  LEU A 879     2132   2394   1755    268     10     38       C  
ATOM     46  CD1 LEU A 879      57.175 112.569  11.124  1.00 18.86           C  
ANISOU   46  CD1 LEU A 879     2647   2598   1922    -43    229   -115       C  
ATOM     47  CD2 LEU A 879      55.538 113.810   9.698  1.00 18.02           C  
ANISOU   47  CD2 LEU A 879     2960   2177   1711    526   -460    -60       C  
ATOM     48  N   ASN A 880      55.598 110.157  13.312  1.00 16.85           N  
ANISOU   48  N   ASN A 880     3189   2336    876    141   -293   -215       N  
ATOM     49  CA  ASN A 880      55.105 110.215  14.690  1.00 16.56           C  
ANISOU   49  CA  ASN A 880     2735   2450   1106   -482   -582   -201       C  
ATOM     50  C   ASN A 880      55.919 111.277  15.426  1.00 18.50           C  
ANISOU   50  C   ASN A 880     3420   2323   1288   -215   -276   -393       C  
ATOM     51  O   ASN A 880      56.897 110.969  16.111  1.00 17.28           O  
ANISOU   51  O   ASN A 880     3213   2082   1273    342     49   -216       O  
ATOM     52  CB  ASN A 880      55.207 108.840  15.355  1.00 19.32           C  
ANISOU   52  CB  ASN A 880     3607   2552   1183   -851     10    442       C  
ATOM     53  CG  ASN A 880      54.516 108.789  16.702  1.00 22.53           C  
ANISOU   53  CG  ASN A 880     4112   3045   1403   -602    -72    573       C  
ATOM     54  OD1 ASN A 880      53.695 109.646  17.024  1.00 22.13           O  
ANISOU   54  OD1 ASN A 880     3932   3168   1307   -476   -210     -9       O  
ATOM     55  ND2 ASN A 880      54.844 107.777  17.496  1.00 26.50           N  
ANISOU   55  ND2 ASN A 880     4915   3421   1733   -348    134    923       N  
ATOM     56  N   LEU A 881      55.505 112.534  15.281  1.00 17.66           N  
ANISOU   56  N   LEU A 881     3011   2278   1421    145     39   -450       N  
ATOM     57  CA  LEU A 881      56.243 113.666  15.831  1.00 19.28           C  
ANISOU   57  CA  LEU A 881     3168   2389   1769    330   -455   -511       C  
ATOM     58  C   LEU A 881      55.899 113.815  17.308  1.00 19.41           C  
ANISOU   58  C   LEU A 881     3274   2452   1650    373   -882   -645       C  
ATOM     59  O   LEU A 881      54.772 114.180  17.658  1.00 19.46           O  
ANISOU   59  O   LEU A 881     3109   2575   1711    545   -255   -775       O  
ATOM     60  CB  LEU A 881      55.891 114.934  15.059  1.00 19.44           C  
ANISOU   60  CB  LEU A 881     2449   2627   2311    383   -536   -214       C  
ATOM     61  CG  LEU A 881      56.768 116.163  15.301  1.00 23.80           C  
ANISOU   61  CG  LEU A 881     3426   2934   2682    326   -192   -248       C  
ATOM     62  CD1 LEU A 881      58.216 115.856  14.955  1.00 25.71           C  
ANISOU   62  CD1 LEU A 881     3580   3218   2972     32    246   -354       C  
ATOM     63  CD2 LEU A 881      56.262 117.346  14.491  1.00 21.82           C  
ANISOU   63  CD2 LEU A 881     3032   2831   2430   -133    142    -67       C  
ATOM     64  N   ARG A 882      56.869 113.536  18.177  1.00 19.31           N  
ANISOU   64  N   ARG A 882     3211   2645   1480    316   -737   -793       N  
ATOM     65  CA  ARG A 882      56.675 113.631  19.616  1.00 20.20           C  
ANISOU   65  CA  ARG A 882     3223   2993   1459    -66   -799   -736       C  
ATOM     66  C   ARG A 882      57.895 114.281  20.248  1.00 22.86           C  
ANISOU   66  C   ARG A 882     4103   3118   1465    708   -408   -764       C  
ATOM     67  O   ARG A 882      59.000 114.243  19.702  1.00 25.39           O  
ANISOU   67  O   ARG A 882     4601   3190   1854    696   -437  -1051       O  
ATOM     68  CB  ARG A 882      56.449 112.252  20.252  1.00 20.69           C  
ANISOU   68  CB  ARG A 882     3301   2984   1578    -61   -524   -397       C  
ATOM     69  CG  ARG A 882      55.181 111.545  19.803  1.00 20.19           C  
ANISOU   69  CG  ARG A 882     2774   3218   1680    485   -504   -380       C  
ATOM     70  CD  ARG A 882      53.940 112.325  20.202  1.00 22.02           C  
ANISOU   70  CD  ARG A 882     3059   3468   1841    839   -196   -345       C  
ATOM     71  NE  ARG A 882      52.716 111.591  19.895  1.00 24.60           N  
ANISOU   71  NE  ARG A 882     3696   3789   1863    661   -621   -454       N  
ATOM     72  CZ  ARG A 882      52.088 111.641  18.725  1.00 23.60           C  
ANISOU   72  CZ  ARG A 882     3630   3876   1463    511     -1   -359       C  
ATOM     73  NH1 ARG A 882      52.567 112.393  17.743  1.00 21.42           N  
ANISOU   73  NH1 ARG A 882     3184   3706   1247    523    334   -547       N  
ATOM     74  NH2 ARG A 882      50.980 110.938  18.535  1.00 23.21           N  
ANISOU   74  NH2 ARG A 882     3356   3908   1556    784   -157   -254       N  
ATOM     75  N   TYR A 883      57.682 114.881  21.416  1.00 21.13           N  
ANISOU   75  N   TYR A 883     3242   3176   1612    858   -933   -713       N  
ATOM     76  CA  TYR A 883      58.754 115.482  22.199  1.00 24.38           C  
ANISOU   76  CA  TYR A 883     3853   3606   1803    744   -971   -904       C  
ATOM     77  C   TYR A 883      59.076 114.537  23.352  1.00 27.90           C  
ANISOU   77  C   TYR A 883     4357   4271   1972    871  -1237   -650       C  
ATOM     78  O   TYR A 883      58.271 114.375  24.274  1.00 29.50           O  
ANISOU   78  O   TYR A 883     4537   4547   2123    655   -533   -424       O  
ATOM     79  CB  TYR A 883      58.339 116.855  22.724  1.00 24.17           C  
ANISOU   79  CB  TYR A 883     3577   3544   2061    151   -809  -1206       C  
ATOM     80  CG  TYR A 883      59.499 117.710  23.191  1.00 23.92           C  
ANISOU   80  CG  TYR A 883     3056   3677   2358    100   -555  -1337       C  
ATOM     81  CD1 TYR A 883      59.950 118.778  22.427  1.00 25.54           C  
ANISOU   81  CD1 TYR A 883     3459   3795   2451    206   -697  -1388       C  
ATOM     82  CD2 TYR A 883      60.146 117.444  24.391  1.00 24.60           C  
ANISOU   82  CD2 TYR A 883     3003   3703   2641    -69   -635  -1221       C  
ATOM     83  CE1 TYR A 883      61.009 119.561  22.847  1.00 24.98           C  
ANISOU   83  CE1 TYR A 883     3084   3869   2537    180   -633  -1613       C  
ATOM     84  CE2 TYR A 883      61.207 118.220  24.818  1.00 26.96           C  
ANISOU   84  CE2 TYR A 883     3464   3947   2833   -211   -822  -1275       C  
ATOM     85  CZ  TYR A 883      61.634 119.278  24.043  1.00 27.40           C  
ANISOU   85  CZ  TYR A 883     3394   4018   2999   -174   -922  -1377       C  
ATOM     86  OH  TYR A 883      62.689 120.054  24.466  1.00 29.63           O  
ANISOU   86  OH  TYR A 883     3730   4079   3449   -499  -1293  -1253       O  
ATOM     87  N   GLU A 884      60.249 113.912  23.294  1.00 32.72           N  
ANISOU   87  N   GLU A 884     5243   4842   2348    869  -1583   -579       N  
ATOM     88  CA  GLU A 884      60.706 113.045  24.369  1.00 37.97           C  
ANISOU   88  CA  GLU A 884     5776   5559   3093    832  -1487   -498       C  
ATOM     89  C   GLU A 884      62.226 113.036  24.377  1.00 39.56           C  
ANISOU   89  C   GLU A 884     5635   5916   3480    523  -1651   -466       C  
ATOM     90  O   GLU A 884      62.874 113.349  23.374  1.00 39.24           O  
ANISOU   90  O   GLU A 884     5489   6016   3404    601  -1141   -231       O  
ATOM     91  CB  GLU A 884      60.145 111.623  24.243  1.00 42.92           C  
ANISOU   91  CB  GLU A 884     7171   5909   3226    610  -1425   -613       C  
ATOM     92  CG  GLU A 884      60.640 110.855  23.033  1.00 48.43           C  
ANISOU   92  CG  GLU A 884     8722   6271   3409    517  -1042   -561       C  
ATOM     93  CD  GLU A 884      60.097 109.441  22.988  1.00 52.93           C  
ANISOU   93  CD  GLU A 884    10070   6614   3427    677   -962   -464       C  
ATOM     94  OE1 GLU A 884      58.896 109.256  23.275  1.00 52.83           O  
ANISOU   94  OE1 GLU A 884    10289   6725   3059    440   -857   -403       O  
ATOM     95  OE2 GLU A 884      60.872 108.514  22.672  1.00 55.56           O  
ANISOU   95  OE2 GLU A 884    10600   6787   3724   1022   -988   -366       O  
ATOM     96  N   SER A 885      62.789 112.672  25.530  1.00 39.83           N  
ANISOU   96  N   SER A 885     5076   6163   3897    366  -2039   -642       N  
ATOM     97  CA  SER A 885      64.233 112.742  25.762  1.00 42.37           C  
ANISOU   97  CA  SER A 885     5477   6404   4218    179  -2132   -791       C  
ATOM     98  C   SER A 885      64.772 114.155  25.548  1.00 40.90           C  
ANISOU   98  C   SER A 885     4876   6363   4302    226  -2271   -828       C  
ATOM     99  O   SER A 885      65.920 114.338  25.134  1.00 41.35           O  
ANISOU   99  O   SER A 885     4813   6368   4529    -14  -1958   -685       O  
ATOM    100  CB  SER A 885      65.010 111.707  24.941  1.00 44.96           C  
ANISOU  100  CB  SER A 885     6159   6520   4403    204  -2027   -946       C  
ATOM    101  OG  SER A 885      66.354 111.614  25.381  1.00 48.34           O  
ANISOU  101  OG  SER A 885     7257   6629   4480    181  -1664   -922       O  
ATOM    102  N   ASN A 886      63.930 115.155  25.820  1.00 39.89           N  
ANISOU  102  N   ASN A 886     4658   6340   4159    567  -2452   -868       N  
ATOM    103  CA  ASN A 886      64.289 116.571  25.736  1.00 38.47           C  
ANISOU  103  CA  ASN A 886     4377   6191   4049    255  -2179  -1128       C  
ATOM    104  C   ASN A 886      64.593 117.032  24.311  1.00 36.27           C  
ANISOU  104  C   ASN A 886     3836   6093   3851    153  -1719  -1447       C  
ATOM    105  O   ASN A 886      65.451 117.895  24.106  1.00 38.91           O  
ANISOU  105  O   ASN A 886     4828   6125   3831    309  -1287  -1722       O  
ATOM    106  CB  ASN A 886      65.411 116.958  26.707  1.00 41.96           C  
ANISOU  106  CB  ASN A 886     5397   6316   4232    193  -1868   -988       C  
ATOM    107  CG  ASN A 886      64.940 117.015  28.147  1.00 44.88           C  
ANISOU  107  CG  ASN A 886     6210   6444   4400    206  -1704   -790       C  
ATOM    108  OD1 ASN A 886      65.428 116.276  29.002  1.00 45.73           O  
ANISOU  108  OD1 ASN A 886     6107   6623   4645    283  -1646   -719       O  
ATOM    109  ND2 ASN A 886      63.984 117.894  28.422  1.00 45.92           N  
ANISOU  109  ND2 ASN A 886     6758   6322   4367    115  -1388   -761       N  
ATOM    110  N   HIS A 887      63.893 116.479  23.321  1.00 33.98           N  
ANISOU  110  N   HIS A 887     3378   5912   3621    294  -1393  -1428       N  
ATOM    111  CA AHIS A 887      64.067 116.898  21.936  0.54 34.08           C  
ANISOU  111  CA AHIS A 887     3488   5865   3595     74  -1137  -1285       C  
ATOM    112  CA BHIS A 887      64.056 116.913  21.941  0.46 34.10           C  
ANISOU  112  CA BHIS A 887     3492   5798   3667    245  -1286  -1412       C  
ATOM    113  C   HIS A 887      62.875 116.418  21.121  1.00 33.36           C  
ANISOU  113  C   HIS A 887     3584   5630   3463    186  -1154  -1340       C  
ATOM    114  O   HIS A 887      62.320 115.349  21.386  1.00 34.14           O  
ANISOU  114  O   HIS A 887     3603   5741   3626    229   -940  -1322       O  
ATOM    115  CB AHIS A 887      65.365 116.337  21.344  0.54 35.70           C  
ANISOU  115  CB AHIS A 887     3784   6042   3740   -306   -759  -1000       C  
ATOM    116  CB BHIS A 887      65.381 116.433  21.329  0.46 35.61           C  
ANISOU  116  CB BHIS A 887     3767   5831   3933    128  -1281  -1420       C  
ATOM    117  CG AHIS A 887      66.041 117.264  20.382  0.54 36.58           C  
ANISOU  117  CG AHIS A 887     3944   6193   3763   -409   -249   -757       C  
ATOM    118  CG BHIS A 887      65.383 114.989  20.928  0.46 36.57           C  
ANISOU  118  CG BHIS A 887     4024   5811   4059    127  -1330  -1509       C  
ATOM    119  ND1AHIS A 887      65.484 117.618  19.172  0.54 37.47           N  
ANISOU  119  ND1AHIS A 887     4130   6265   3842   -470   -119   -667       N  
ATOM    120  ND1BHIS A 887      64.658 114.025  21.595  0.46 37.86           N  
ANISOU  120  ND1BHIS A 887     4426   5826   4134    288  -1261  -1503       N  
ATOM    121  CD2AHIS A 887      67.229 117.909  20.452  0.54 36.59           C  
ANISOU  121  CD2AHIS A 887     3871   6251   3779   -628   -160   -649       C  
ATOM    122  CD2BHIS A 887      66.027 114.348  19.924  0.46 37.20           C  
ANISOU  122  CD2BHIS A 887     4206   5770   4158    183  -1238  -1515       C  
ATOM    123  CE1AHIS A 887      66.299 118.442  18.539  0.54 37.40           C  
ANISOU  123  CE1AHIS A 887     4096   6277   3837   -707    -17   -563       C  
ATOM    124  CE1BHIS A 887      64.853 112.852  21.017  0.46 38.10           C  
ANISOU  124  CE1BHIS A 887     4576   5758   4142    420  -1078  -1592       C  
ATOM    125  NE2AHIS A 887      67.365 118.635  19.294  0.54 36.90           N  
ANISOU  125  NE2AHIS A 887     3970   6288   3763   -705   -230   -580       N  
ATOM    126  NE2BHIS A 887      65.681 113.021  20.002  0.46 38.32           N  
ANISOU  126  NE2BHIS A 887     4612   5749   4199    282  -1201  -1576       N  
ATOM    127  N   LEU A 888      62.496 117.216  20.125  1.00 29.28           N  
ANISOU  127  N   LEU A 888     3211   5152   2761    -71  -1204  -1228       N  
ATOM    128  CA  LEU A 888      61.415 116.845  19.222  1.00 26.18           C  
ANISOU  128  CA  LEU A 888     3318   4554   2073    260   -603  -1183       C  
ATOM    129  C   LEU A 888      61.958 115.888  18.168  1.00 25.85           C  
ANISOU  129  C   LEU A 888     3413   4081   2328    204    -52  -1202       C  
ATOM    130  O   LEU A 888      62.977 116.170  17.530  1.00 27.45           O  
ANISOU  130  O   LEU A 888     3465   4085   2880   -459    215  -1555       O  
ATOM    131  CB  LEU A 888      60.841 118.093  18.553  1.00 26.48           C  
ANISOU  131  CB  LEU A 888     3762   4594   1704    145   -681   -942       C  
ATOM    132  CG  LEU A 888      59.559 117.904  17.741  1.00 28.29           C  
ANISOU  132  CG  LEU A 888     4464   4554   1733    422   -295   -563       C  
ATOM    133  CD1 LEU A 888      58.407 117.492  18.646  1.00 25.51           C  
ANISOU  133  CD1 LEU A 888     3482   4554   1655    388   -335   -542       C  
ATOM    134  CD2 LEU A 888      59.215 119.170  16.971  1.00 27.24           C  
ANISOU  134  CD2 LEU A 888     4364   4424   1561    679    -45   -508       C  
ATOM    135  N   ILE A 889      61.277 114.755  17.984  1.00 23.28           N  
ANISOU  135  N   ILE A 889     3278   3636   1932    525   -345  -1010       N  
ATOM    136  CA  ILE A 889      61.801 113.661  17.174  1.00 21.67           C  
ANISOU  136  CA  ILE A 889     2819   3532   1885    453   -786   -959       C  
ATOM    137  C   ILE A 889      60.643 112.922  16.515  1.00 20.19           C  
ANISOU  137  C   ILE A 889     2751   3336   1583    219    -74   -941       C  
ATOM    138  O   ILE A 889      59.508 112.941  16.996  1.00 21.64           O  
ANISOU  138  O   ILE A 889     2730   3574   1918     60   -594   -793       O  
ATOM    139  CB  ILE A 889      62.654 112.698  18.040  1.00 26.24           C  
ANISOU  139  CB  ILE A 889     3965   3630   2376   1185   -989   -676       C  
ATOM    140  CG1 ILE A 889      63.447 111.720  17.170  1.00 31.49           C  
ANISOU  140  CG1 ILE A 889     5324   3935   2706   1126   -996   -457       C  
ATOM    141  CG2 ILE A 889      61.774 111.948  19.032  1.00 22.80           C  
ANISOU  141  CG2 ILE A 889     2984   3322   2356    748  -1252   -690       C  
ATOM    142  CD1 ILE A 889      64.271 110.728  17.963  1.00 35.18           C  
ANISOU  142  CD1 ILE A 889     6514   3996   2859    662  -1093   -332       C  
ATOM    143  N   ASP A 890      60.938 112.278  15.388  1.00 18.10           N  
ANISOU  143  N   ASP A 890     2703   2997   1176    -11   -153   -794       N  
ATOM    144  CA  ASP A 890      60.002 111.371  14.736  1.00 18.22           C  
ANISOU  144  CA  ASP A 890     2945   2903   1075    191   -473   -562       C  
ATOM    145  C   ASP A 890      60.219 109.971  15.296  1.00 19.69           C  
ANISOU  145  C   ASP A 890     3122   2889   1468    770   -322   -387       C  
ATOM    146  O   ASP A 890      61.293 109.385  15.118  1.00 20.46           O  
ANISOU  146  O   ASP A 890     2679   3313   1780    611   -128    -78       O  
ATOM    147  CB  ASP A 890      60.225 111.377  13.224  1.00 18.35           C  
ANISOU  147  CB  ASP A 890     3015   2799   1158    174   -475   -674       C  
ATOM    148  CG  ASP A 890      59.413 110.311  12.508  1.00 17.77           C  
ANISOU  148  CG  ASP A 890     2516   3096   1139    598   -207   -628       C  
ATOM    149  OD1 ASP A 890      58.322 109.957  13.001  1.00 17.48           O  
ANISOU  149  OD1 ASP A 890     2272   3002   1368    -67     -9   -509       O  
ATOM    150  OD2 ASP A 890      59.866 109.830  11.447  1.00 18.71           O  
ANISOU  150  OD2 ASP A 890     3023   3033   1053    465   -354   -493       O  
ATOM    151  N   LEU A 891      59.201 109.437  15.971  1.00 20.84           N  
ANISOU  151  N   LEU A 891     3587   2835   1496    664   -338   -659       N  
ATOM    152  CA  LEU A 891      59.305 108.121  16.589  1.00 21.45           C  
ANISOU  152  CA  LEU A 891     3739   2967   1445    815   -288   -440       C  
ATOM    153  C   LEU A 891      59.041 106.977  15.618  1.00 20.01           C  
ANISOU  153  C   LEU A 891     3503   2580   1518    705   -121   -336       C  
ATOM    154  O   LEU A 891      59.192 105.814  16.008  1.00 22.78           O  
ANISOU  154  O   LEU A 891     4404   2329   1923    443    142   -515       O  
ATOM    155  CB  LEU A 891      58.349 108.015  17.779  1.00 23.20           C  
ANISOU  155  CB  LEU A 891     4177   3316   1321    676   -289   -313       C  
ATOM    156  CG  LEU A 891      58.641 108.931  18.968  1.00 24.94           C  
ANISOU  156  CG  LEU A 891     4651   3296   1529   1084    284   -160       C  
ATOM    157  CD1 LEU A 891      57.610 108.727  20.066  1.00 27.17           C  
ANISOU  157  CD1 LEU A 891     5512   3058   1752   1085    921    130       C  
ATOM    158  CD2 LEU A 891      60.046 108.687  19.495  1.00 28.09           C  
ANISOU  158  CD2 LEU A 891     5361   3579   1732    496    -46   -142       C  
ATOM    159  N   SER A 892      58.658 107.270  14.378  1.00 20.84           N  
ANISOU  159  N   SER A 892     3955   2671   1292    827   -327   -121       N  
ATOM    160  CA  SER A 892      58.371 106.214  13.421  1.00 20.30           C  
ANISOU  160  CA  SER A 892     3473   2728   1513    525    -82    -55       C  
ATOM    161  C   SER A 892      59.660 105.502  13.013  1.00 20.21           C  
ANISOU  161  C   SER A 892     3413   2773   1493   1051    101   -139       C  
ATOM    162  O   SER A 892      60.774 105.933  13.327  1.00 20.39           O  
ANISOU  162  O   SER A 892     3221   2878   1648    509   -250   -378       O  
ATOM    163  CB  SER A 892      57.678 106.784  12.184  1.00 19.27           C  
ANISOU  163  CB  SER A 892     3445   2421   1455   -146    -55    355       C  
ATOM    164  OG  SER A 892      58.605 107.441  11.336  1.00 18.02           O  
ANISOU  164  OG  SER A 892     2741   2470   1636    424   -506     -6       O  
ATOM    165  N   ARG A 893      59.492 104.392  12.291  1.00 19.56           N  
ANISOU  165  N   ARG A 893     3563   2442   1425    829    628   -337       N  
ATOM    166  CA  ARG A 893      60.633 103.610  11.828  1.00 20.63           C  
ANISOU  166  CA  ARG A 893     3800   2586   1451    367    624   -298       C  
ATOM    167  C   ARG A 893      61.498 104.364  10.828  1.00 20.63           C  
ANISOU  167  C   ARG A 893     3529   2674   1637    275    -45   -360       C  
ATOM    168  O   ARG A 893      62.623 103.929  10.557  1.00 21.11           O  
ANISOU  168  O   ARG A 893     3402   2792   1828    467    133   -359       O  
ATOM    169  CB  ARG A 893      60.148 102.297  11.211  1.00 22.44           C  
ANISOU  169  CB  ARG A 893     4013   2800   1714    159    124   -428       C  
ATOM    170  CG  ARG A 893      59.244 102.480  10.003  1.00 23.46           C  
ANISOU  170  CG  ARG A 893     4199   2774   1941    147     39   -461       C  
ATOM    171  CD  ARG A 893      58.584 101.171   9.602  1.00 26.40           C  
ANISOU  171  CD  ARG A 893     5056   2909   2066    111   -485   -536       C  
ATOM    172  NE  ARG A 893      57.743 101.322   8.419  1.00 30.98           N  
ANISOU  172  NE  ARG A 893     6026   3136   2608    412   -174   -511       N  
ATOM    173  CZ  ARG A 893      56.482 101.742   8.446  1.00 32.82           C  
ANISOU  173  CZ  ARG A 893     6560   3333   2579     62    -27   -443       C  
ATOM    174  NH1 ARG A 893      55.911 102.059   9.600  1.00 31.10           N  
ANISOU  174  NH1 ARG A 893     6140   3409   2268   -194    697   -349       N  
ATOM    175  NH2 ARG A 893      55.792 101.847   7.319  1.00 33.34           N  
ANISOU  175  NH2 ARG A 893     6708   3318   2643     84   -496   -437       N  
ATOM    176  N   TYR A 894      61.010 105.474  10.277  1.00 18.09           N  
ANISOU  176  N   TYR A 894     2778   2637   1460    185   -253   -650       N  
ATOM    177  CA  TYR A 894      61.784 106.248   9.316  1.00 20.28           C  
ANISOU  177  CA  TYR A 894     3191   2929   1586    337   -687   -589       C  
ATOM    178  C   TYR A 894      62.678 107.285   9.978  1.00 19.49           C  
ANISOU  178  C   TYR A 894     2547   2990   1867   1125    101   -896       C  
ATOM    179  O   TYR A 894      63.733 107.620   9.425  1.00 22.33           O  
ANISOU  179  O   TYR A 894     3146   3185   2152   1213   -177   -693       O  
ATOM    180  CB  TYR A 894      60.849 106.918   8.305  1.00 20.30           C  
ANISOU  180  CB  TYR A 894     2950   3150   1613    345   -139   -680       C  
ATOM    181  CG  TYR A 894      60.037 105.924   7.509  1.00 18.96           C  
ANISOU  181  CG  TYR A 894     2378   3280   1544   -712   -116   -760       C  
ATOM    182  CD1 TYR A 894      60.581 105.282   6.404  1.00 21.00           C  
ANISOU  182  CD1 TYR A 894     3166   3383   1431    -51    387   -574       C  
ATOM    183  CD2 TYR A 894      58.734 105.612   7.873  1.00 19.52           C  
ANISOU  183  CD2 TYR A 894     2389   3378   1651   -313    375   -874       C  
ATOM    184  CE1 TYR A 894      59.847 104.365   5.677  1.00 21.95           C  
ANISOU  184  CE1 TYR A 894     3126   3610   1606   -502    860   -365       C  
ATOM    185  CE2 TYR A 894      57.991 104.696   7.152  1.00 21.47           C  
ANISOU  185  CE2 TYR A 894     3042   3437   1678   -146    625   -709       C  
ATOM    186  CZ  TYR A 894      58.553 104.076   6.055  1.00 20.54           C  
ANISOU  186  CZ  TYR A 894     2684   3506   1613   -374    813   -279       C  
ATOM    187  OH  TYR A 894      57.818 103.164   5.334  1.00 24.25           O  
ANISOU  187  OH  TYR A 894     4069   3388   1759   -204    731   -352       O  
ATOM    188  N   ALA A 895      62.285 107.789  11.148  1.00 19.41           N  
ANISOU  188  N   ALA A 895     2883   2965   1528    438   -163   -605       N  
ATOM    189  CA  ALA A 895      63.074 108.764  11.902  1.00 18.01           C  
ANISOU  189  CA  ALA A 895     2703   2614   1527    326   -404   -445       C  
ATOM    190  C   ALA A 895      63.475 109.952  11.031  1.00 18.83           C  
ANISOU  190  C   ALA A 895     2978   2566   1609   -168   -283   -171       C  
ATOM    191  O   ALA A 895      64.651 110.308  10.918  1.00 19.54           O  
ANISOU  191  O   ALA A 895     2644   2800   1982    307   -275   -428       O  
ATOM    192  CB  ALA A 895      64.288 108.112  12.569  1.00 20.67           C  
ANISOU  192  CB  ALA A 895     3413   2722   1718    305   -764   -603       C  
ATOM    193  N   SER A 896      62.475 110.563  10.398  1.00 18.30           N  
ANISOU  193  N   SER A 896     2979   2535   1439    169   -437   -252       N  
ATOM    194  CA  SER A 896      62.729 111.691   9.514  1.00 17.72           C  
ANISOU  194  CA  SER A 896     2411   2854   1469   -231   -735   -307       C  
ATOM    195  C   SER A 896      63.307 112.862  10.298  1.00 20.19           C  
ANISOU  195  C   SER A 896     2924   3081   1666     -5   -500   -494       C  
ATOM    196  O   SER A 896      62.912 113.126  11.438  1.00 21.68           O  
ANISOU  196  O   SER A 896     3347   3279   1612    200    -98   -750       O  
ATOM    197  CB  SER A 896      61.433 112.111   8.819  1.00 18.20           C  
ANISOU  197  CB  SER A 896     2593   2914   1407   -258   -855   -568       C  
ATOM    198  OG  SER A 896      60.958 111.082   7.967  1.00 18.37           O  
ANISOU  198  OG  SER A 896     2119   3402   1458    -73   -344   -483       O  
ATOM    199  N   LYS A 897      64.252 113.564   9.679  1.00 19.85           N  
ANISOU  199  N   LYS A 897     2361   3083   2098    326   -405   -537       N  
ATOM    200  CA  LYS A 897      64.943 114.653  10.356  1.00 21.47           C  
ANISOU  200  CA  LYS A 897     2761   2929   2466    284   -632   -792       C  
ATOM    201  C   LYS A 897      64.003 115.828  10.601  1.00 21.17           C  
ANISOU  201  C   LYS A 897     3292   2646   2106    423   -744   -736       C  
ATOM    202  O   LYS A 897      63.153 116.152   9.767  1.00 19.08           O  
ANISOU  202  O   LYS A 897     2933   2370   1948    -38   -820   -687       O  
ATOM    203  CB  LYS A 897      66.145 115.111   9.529  1.00 27.92           C  
ANISOU  203  CB  LYS A 897     3761   3393   3455    180   -375   -586       C  
ATOM    204  CG  LYS A 897      66.694 116.456   9.965  1.00 34.37           C  
ANISOU  204  CG  LYS A 897     5010   3960   4090   -272   -487   -335       C  
ATOM    205  CD  LYS A 897      68.162 116.616   9.653  1.00 37.99           C  
ANISOU  205  CD  LYS A 897     5664   4399   4372   -149   -713   -109       C  
ATOM    206  CE  LYS A 897      68.710 117.833  10.375  1.00 41.48           C  
ANISOU  206  CE  LYS A 897     6817   4565   4379   -267   -873   -118       C  
ATOM    207  NZ  LYS A 897      68.532 117.730  11.849  1.00 43.37           N  
ANISOU  207  NZ  LYS A 897     7339   4726   4413   -362   -894     -4       N  
ATOM    208  N   ILE A 898      64.163 116.466  11.759  1.00 21.67           N  
ANISOU  208  N   ILE A 898     3693   2708   1832    620   -757  -1016       N  
ATOM    209  CA  ILE A 898      63.368 117.621  12.155  1.00 21.95           C  
ANISOU  209  CA  ILE A 898     3864   2553   1923    713   -351  -1075       C  
ATOM    210  C   ILE A 898      64.293 118.826  12.261  1.00 21.40           C  
ANISOU  210  C   ILE A 898     3207   2886   2037    762   -863   -848       C  
ATOM    211  O   ILE A 898      65.342 118.755  12.912  1.00 24.90           O  
ANISOU  211  O   ILE A 898     4010   3221   2230    194  -1439   -591       O  
ATOM    212  CB  ILE A 898      62.651 117.374  13.495  1.00 23.40           C  
ANISOU  212  CB  ILE A 898     4159   2617   2114    353    -52  -1252       C  
ATOM    213  CG1 ILE A 898      61.985 115.997  13.502  1.00 27.06           C  
ANISOU  213  CG1 ILE A 898     4922   3072   2288    128   -527  -1310       C  
ATOM    214  CG2 ILE A 898      61.630 118.468  13.761  1.00 25.66           C  
ANISOU  214  CG2 ILE A 898     4927   2557   2268    135   -252  -1155       C  
ATOM    215  CD1 ILE A 898      60.944 115.813  12.424  1.00 31.32           C  
ANISOU  215  CD1 ILE A 898     6032   3327   2540   -118   -223  -1192       C  
ATOM    216  N   ASN A 899      63.904 119.927  11.621  1.00 21.51           N  
ANISOU  216  N   ASN A 899     3487   2528   2159    285   -776   -679       N  
ATOM    217  CA  ASN A 899      64.604 121.202  11.726  1.00 22.91           C  
ANISOU  217  CA  ASN A 899     3150   3032   2522    367   -433   -870       C  
ATOM    218  C   ASN A 899      63.699 122.179  12.462  1.00 20.33           C  
ANISOU  218  C   ASN A 899     2457   2776   2491    320   -569   -858       C  
ATOM    219  O   ASN A 899      62.622 122.527  11.964  1.00 21.97           O  
ANISOU  219  O   ASN A 899     2728   2904   2715    263   -859   -611       O  
ATOM    220  CB  ASN A 899      64.952 121.749  10.341  1.00 26.65           C  
ANISOU  220  CB  ASN A 899     3554   3638   2935    779    218  -1065       C  
ATOM    221  CG  ASN A 899      66.056 120.963   9.662  1.00 29.59           C  
ANISOU  221  CG  ASN A 899     3696   4178   3369    678   -365   -844       C  
ATOM    222  OD1 ASN A 899      66.993 120.503  10.312  1.00 33.82           O  
ANISOU  222  OD1 ASN A 899     4589   4571   3691    921   -168   -555       O  
ATOM    223  ND2 ASN A 899      65.951 120.809   8.347  1.00 30.07           N  
ANISOU  223  ND2 ASN A 899     3861   4108   3455    701   -537   -865       N  
ATOM    224  N   ILE A 900      64.133 122.621  13.639  1.00 20.38           N  
ANISOU  224  N   ILE A 900     2649   2773   2322    388   -502   -743       N  
ATOM    225  CA  ILE A 900      63.343 123.495  14.500  1.00 22.37           C  
ANISOU  225  CA  ILE A 900     3215   2682   2601    238   -537   -743       C  
ATOM    226  C   ILE A 900      63.957 124.887  14.482  1.00 20.86           C  
ANISOU  226  C   ILE A 900     2681   2776   2468    145  -1139   -783       C  
ATOM    227  O   ILE A 900      65.160 125.046  14.727  1.00 23.94           O  
ANISOU  227  O   ILE A 900     3344   2864   2888    190   -888   -729       O  
ATOM    228  CB  ILE A 900      63.262 122.950  15.936  1.00 24.43           C  
ANISOU  228  CB  ILE A 900     3726   2651   2904     72    108   -956       C  
ATOM    229  CG1 ILE A 900      62.665 121.541  15.945  1.00 27.33           C  
ANISOU  229  CG1 ILE A 900     4570   2665   3150    696    248  -1369       C  
ATOM    230  CG2 ILE A 900      62.442 123.883  16.814  1.00 24.15           C  
ANISOU  230  CG2 ILE A 900     3746   2440   2992    -24   -114   -909       C  
ATOM    231  CD1 ILE A 900      63.695 120.442  16.099  1.00 31.05           C  
ANISOU  231  CD1 ILE A 900     5416   2992   3388    869     89  -1299       C  
ATOM    232  N   GLY A 901      63.133 125.890  14.197  1.00 20.95           N  
ANISOU  232  N   GLY A 901     3294   2759   1907    299  -1014   -402       N  
ATOM    233  CA  GLY A 901      63.582 127.264  14.255  1.00 19.95           C  
ANISOU  233  CA  GLY A 901     3005   2727   1847    513   -683   -371       C  
ATOM    234  C   GLY A 901      63.769 127.744  15.682  1.00 22.07           C  
ANISOU  234  C   GLY A 901     3412   2902   2072    100   -709   -450       C  
ATOM    235  O   GLY A 901      63.316 127.133  16.651  1.00 24.26           O  
ANISOU  235  O   GLY A 901     3970   3202   2044   -851   -750   -472       O  
ATOM    236  N   SER A 902      64.455 128.882  15.807  1.00 19.58           N  
ANISOU  236  N   SER A 902     2663   2648   2129    861   -396   -738       N  
ATOM    237  CA  SER A 902      64.803 129.401  17.125  1.00 20.67           C  
ANISOU  237  CA  SER A 902     2609   2762   2484    285    204   -609       C  
ATOM    238  C   SER A 902      63.607 129.988  17.865  1.00 20.41           C  
ANISOU  238  C   SER A 902     2444   3000   2310     81   -103   -459       C  
ATOM    239  O   SER A 902      63.634 130.057  19.098  1.00 23.00           O  
ANISOU  239  O   SER A 902     3287   3283   2168    209   -565   -413       O  
ATOM    240  CB  SER A 902      65.913 130.446  17.009  1.00 23.85           C  
ANISOU  240  CB  SER A 902     3055   2867   3140    100    -10   -361       C  
ATOM    241  OG  SER A 902      65.478 131.569  16.262  1.00 25.65           O  
ANISOU  241  OG  SER A 902     3144   2931   3671    298    389   -140       O  
ATOM    242  N   LYS A 903      62.564 130.413  17.150  1.00 19.04           N  
ANISOU  242  N   LYS A 903     2524   2688   2022     41   -265   -270       N  
ATOM    243  CA  LYS A 903      61.404 131.047  17.766  1.00 18.10           C  
ANISOU  243  CA  LYS A 903     2058   2584   2235   -343    -15   -134       C  
ATOM    244  C   LYS A 903      60.234 130.086  17.957  1.00 17.10           C  
ANISOU  244  C   LYS A 903     1686   2833   1977    185    398    225       C  
ATOM    245  O   LYS A 903      59.078 130.518  18.015  1.00 18.29           O  
ANISOU  245  O   LYS A 903     2147   2699   2102   -109    -18    274       O  
ATOM    246  CB  LYS A 903      60.981 132.294  16.988  1.00 19.81           C  
ANISOU  246  CB  LYS A 903     2579   2375   2572   -246    328   -299       C  
ATOM    247  CG  LYS A 903      61.966 133.447  17.106  1.00 21.80           C  
ANISOU  247  CG  LYS A 903     2969   2407   2906   -459    792   -727       C  
ATOM    248  CD  LYS A 903      62.199 133.825  18.560  1.00 23.27           C  
ANISOU  248  CD  LYS A 903     2612   2822   3409   -679   1099   -908       C  
ATOM    249  CE  LYS A 903      63.280 134.885  18.691  1.00 26.55           C  
ANISOU  249  CE  LYS A 903     3247   3016   3824   -249   1262  -1324       C  
ATOM    250  NZ  LYS A 903      64.596 134.396  18.195  1.00 26.33           N  
ANISOU  250  NZ  LYS A 903     3063   2934   4008    147    741  -1531       N  
ATOM    251  N   VAL A 904      60.514 128.792  18.056  1.00 19.04           N  
ANISOU  251  N   VAL A 904     2499   2799   1937    126    322    376       N  
ATOM    252  CA  VAL A 904      59.502 127.798  18.395  1.00 18.56           C  
ANISOU  252  CA  VAL A 904     2438   2888   1726   -265     93    127       C  
ATOM    253  C   VAL A 904      59.466 127.657  19.910  1.00 20.61           C  
ANISOU  253  C   VAL A 904     2959   3180   1694    201    171    -14       C  
ATOM    254  O   VAL A 904      60.511 127.503  20.553  1.00 22.44           O  
ANISOU  254  O   VAL A 904     2951   3737   1839     63   -335   -326       O  
ATOM    255  CB  VAL A 904      59.813 126.452  17.721  1.00 18.73           C  
ANISOU  255  CB  VAL A 904     3162   2481   1474   -365    141    384       C  
ATOM    256  CG1 VAL A 904      58.819 125.394  18.164  1.00 17.71           C  
ANISOU  256  CG1 VAL A 904     3695   1992   1044   -413   -308    266       C  
ATOM    257  CG2 VAL A 904      59.797 126.601  16.208  1.00 17.38           C  
ANISOU  257  CG2 VAL A 904     3138   2324   1143   -464    231    562       C  
ATOM    258  N   ASN A 905      58.267 127.716  20.483  1.00 19.79           N  
ANISOU  258  N   ASN A 905     2937   2920   1662    -88    532    -55       N  
ATOM    259  CA AASN A 905      58.082 127.624  21.923  0.39 20.95           C  
ANISOU  259  CA AASN A 905     3196   2890   1874   -541    320   -179       C  
ATOM    260  CA BASN A 905      58.074 127.629  21.923  0.61 20.96           C  
ANISOU  260  CA BASN A 905     3233   2994   1738   -330    455   -118       C  
ATOM    261  C   ASN A 905      57.461 126.283  22.286  1.00 21.75           C  
ANISOU  261  C   ASN A 905     3534   3008   1721   -689    140    -49       C  
ATOM    262  O   ASN A 905      56.537 125.811  21.616  1.00 23.04           O  
ANISOU  262  O   ASN A 905     3859   3160   1736  -1005     -6     88       O  
ATOM    263  CB AASN A 905      57.194 128.757  22.444  0.39 21.21           C  
ANISOU  263  CB AASN A 905     3088   2824   2146   -797    338   -496       C  
ATOM    264  CB BASN A 905      57.155 128.753  22.409  0.61 20.75           C  
ANISOU  264  CB BASN A 905     2999   3154   1732   -118    665   -401       C  
ATOM    265  CG AASN A 905      57.986 129.998  22.804  0.39 21.31           C  
ANISOU  265  CG AASN A 905     2960   2792   2346  -1010   -234   -650       C  
ATOM    266  CG BASN A 905      57.063 128.818  23.920  0.61 20.85           C  
ANISOU  266  CG BASN A 905     2873   3336   1712    215   -260   -428       C  
ATOM    267  OD1AASN A 905      59.207 129.948  22.947  0.39 22.26           O  
ANISOU  267  OD1AASN A 905     3087   2765   2607  -1058   -894   -759       O  
ATOM    268  OD1BASN A 905      58.041 128.568  24.624  0.61 20.89           O  
ANISOU  268  OD1BASN A 905     2440   3542   1955    126   -141   -414       O  
ATOM    269  ND2AASN A 905      57.291 131.118  22.965  0.39 22.17           N  
ANISOU  269  ND2AASN A 905     3268   2905   2250   -798   -109   -565       N  
ATOM    270  ND2BASN A 905      55.882 129.153  24.427  0.61 21.46           N  
ANISOU  270  ND2BASN A 905     2833   3396   1926    219  -1232   -554       N  
ATOM    271  N   PHE A 906      57.977 125.675  23.351  1.00 19.73           N  
ANISOU  271  N   PHE A 906     2740   3088   1669   -881   -458    121       N  
ATOM    272  CA  PHE A 906      57.472 124.413  23.871  1.00 21.31           C  
ANISOU  272  CA  PHE A 906     3291   3112   1694   -500   -281     60       C  
ATOM    273  C   PHE A 906      56.955 124.647  25.282  1.00 22.36           C  
ANISOU  273  C   PHE A 906     3562   3352   1582   -623     50   -286       C  
ATOM    274  O   PHE A 906      57.668 125.204  26.123  1.00 24.77           O  
ANISOU  274  O   PHE A 906     4285   3358   1766  -1482   -621   -283       O  
ATOM    275  CB  PHE A 906      58.573 123.348  23.887  1.00 21.90           C  
ANISOU  275  CB  PHE A 906     3618   3040   1663   -978     96    -16       C  
ATOM    276  CG  PHE A 906      59.120 123.020  22.525  1.00 21.87           C  
ANISOU  276  CG  PHE A 906     3636   3061   1611   -557   -399    302       C  
ATOM    277  CD1 PHE A 906      58.489 122.089  21.716  1.00 21.21           C  
ANISOU  277  CD1 PHE A 906     3268   3065   1727   -335    -13    201       C  
ATOM    278  CD2 PHE A 906      60.267 123.641  22.056  1.00 21.67           C  
ANISOU  278  CD2 PHE A 906     3702   3046   1484   -356   -451    515       C  
ATOM    279  CE1 PHE A 906      58.990 121.785  20.463  1.00 22.12           C  
ANISOU  279  CE1 PHE A 906     3500   2982   1923     36   -366    196       C  
ATOM    280  CE2 PHE A 906      60.773 123.340  20.804  1.00 21.47           C  
ANISOU  280  CE2 PHE A 906     3494   2978   1686   -457   -753    201       C  
ATOM    281  CZ  PHE A 906      60.133 122.411  20.007  1.00 22.24           C  
ANISOU  281  CZ  PHE A 906     3630   2950   1868    365   -494    287       C  
ATOM    282  N   ASP A 907      55.720 124.230  25.533  1.00 19.69           N  
ANISOU  282  N   ASP A 907     2814   3183   1485    288   -136   -338       N  
ATOM    283  CA  ASP A 907      55.087 124.425  26.830  1.00 20.28           C  
ANISOU  283  CA  ASP A 907     3215   3239   1252    276   -111   -588       C  
ATOM    284  C   ASP A 907      55.883 123.694  27.905  1.00 20.64           C  
ANISOU  284  C   ASP A 907     3611   2905   1325   -110   -271   -565       C  
ATOM    285  O   ASP A 907      56.069 122.473  27.802  1.00 21.24           O  
ANISOU  285  O   ASP A 907     3711   2678   1681   -126   -827   -332       O  
ATOM    286  CB  ASP A 907      53.665 123.868  26.772  1.00 21.65           C  
ANISOU  286  CB  ASP A 907     3280   3614   1333    742     77   -736       C  
ATOM    287  CG  ASP A 907      52.793 124.348  27.921  1.00 24.56           C  
ANISOU  287  CG  ASP A 907     3635   3981   1713    862   -175   -794       C  
ATOM    288  OD1 ASP A 907      51.561 124.430  27.731  1.00 24.82           O  
ANISOU  288  OD1 ASP A 907     3400   4040   1989   1189    -56   -650       O  
ATOM    289  OD2 ASP A 907      53.326 124.640  29.011  1.00 26.81           O  
ANISOU  289  OD2 ASP A 907     4201   4266   1721    245     43   -997       O  
ATOM    290  N   PRO A 908      56.371 124.385  28.939  1.00 20.22           N  
ANISOU  290  N   PRO A 908     3340   2844   1498   -649   -459   -667       N  
ATOM    291  CA  PRO A 908      57.121 123.682  29.993  1.00 23.65           C  
ANISOU  291  CA  PRO A 908     4230   3101   1654   -702   -721   -562       C  
ATOM    292  C   PRO A 908      56.298 122.643  30.734  1.00 24.78           C  
ANISOU  292  C   PRO A 908     4384   3141   1891   -404  -1155   -189       C  
ATOM    293  O   PRO A 908      56.859 121.659  31.232  1.00 27.70           O  
ANISOU  293  O   PRO A 908     5191   3054   2281     97  -1251   -159       O  
ATOM    294  CB  PRO A 908      57.583 124.818  30.918  1.00 25.69           C  
ANISOU  294  CB  PRO A 908     4946   3148   1666   -381   -527   -364       C  
ATOM    295  CG  PRO A 908      56.627 125.938  30.650  1.00 25.85           C  
ANISOU  295  CG  PRO A 908     5005   3173   1644      2   -407   -708       C  
ATOM    296  CD  PRO A 908      56.280 125.832  29.194  1.00 22.20           C  
ANISOU  296  CD  PRO A 908     3903   3026   1505   -521   -520   -744       C  
ATOM    297  N   ILE A 909      54.979 122.829  30.819  1.00 22.69           N  
ANISOU  297  N   ILE A 909     3680   3271   1668   -407   -682   -289       N  
ATOM    298  CA  ILE A 909      54.132 121.846  31.485  1.00 26.83           C  
ANISOU  298  CA  ILE A 909     4961   3385   1850   -448   -499   -230       C  
ATOM    299  C   ILE A 909      53.983 120.594  30.632  1.00 24.53           C  
ANISOU  299  C   ILE A 909     4352   3374   1594    -69   -661     28       C  
ATOM    300  O   ILE A 909      53.884 119.479  31.161  1.00 26.04           O  
ANISOU  300  O   ILE A 909     4799   3579   1517    139   -640   -131       O  
ATOM    301  CB  ILE A 909      52.768 122.472  31.829  1.00 29.24           C  
ANISOU  301  CB  ILE A 909     5183   3663   2262   -582    584   -430       C  
ATOM    302  CG1 ILE A 909      52.960 123.852  32.459  1.00 34.37           C  
ANISOU  302  CG1 ILE A 909     6485   3935   2640   -137    369   -885       C  
ATOM    303  CG2 ILE A 909      51.981 121.563  32.761  1.00 32.25           C  
ANISOU  303  CG2 ILE A 909     5948   3887   2419   -690    884   -159       C  
ATOM    304  CD1 ILE A 909      51.712 124.701  32.447  1.00 37.65           C  
ANISOU  304  CD1 ILE A 909     7266   4094   2947    -88    360  -1097       C  
ATOM    305  N   ASP A 910      53.968 120.749  29.308  1.00 23.54           N  
ANISOU  305  N   ASP A 910     4182   3314   1449   -141   -975   -114       N  
ATOM    306  CA  ASP A 910      53.761 119.630  28.386  1.00 23.92           C  
ANISOU  306  CA  ASP A 910     4588   3244   1255   -433   -299    319       C  
ATOM    307  C   ASP A 910      54.445 120.015  27.072  1.00 17.60           C  
ANISOU  307  C   ASP A 910     3100   2744    845   -308   -209     78       C  
ATOM    308  O   ASP A 910      53.841 120.655  26.209  1.00 18.34           O  
ANISOU  308  O   ASP A 910     3633   2349    987    234   -359     91       O  
ATOM    309  CB  ASP A 910      52.275 119.362  28.194  1.00 26.23           C  
ANISOU  309  CB  ASP A 910     4759   3458   1751   -729   -441    849       C  
ATOM    310  CG  ASP A 910      52.003 118.196  27.262  1.00 32.05           C  
ANISOU  310  CG  ASP A 910     5741   3888   2550   -265  -1629    873       C  
ATOM    311  OD1 ASP A 910      52.937 117.416  26.984  1.00 35.24           O  
ANISOU  311  OD1 ASP A 910     6849   3900   2641    162  -1359    935       O  
ATOM    312  OD2 ASP A 910      50.845 118.057  26.814  1.00 35.52           O  
ANISOU  312  OD2 ASP A 910     6302   4346   2847   -292  -1692   1138       O  
ATOM    313  N   LYS A 911      55.710 119.611  26.936  1.00 19.87           N  
ANISOU  313  N   LYS A 911     3561   2897   1091   -466   -167     48       N  
ATOM    314  CA  LYS A 911      56.535 120.040  25.811  1.00 19.66           C  
ANISOU  314  CA  LYS A 911     2819   3183   1469   -161   -873   -409       C  
ATOM    315  C   LYS A 911      56.072 119.491  24.468  1.00 18.01           C  
ANISOU  315  C   LYS A 911     2415   2875   1554    -66   -393   -374       C  
ATOM    316  O   LYS A 911      56.614 119.900  23.436  1.00 19.33           O  
ANISOU  316  O   LYS A 911     2582   2942   1821   -107   -299   -353       O  
ATOM    317  CB  LYS A 911      58.008 119.714  26.066  1.00 21.97           C  
ANISOU  317  CB  LYS A 911     3086   3428   1835    291  -1151   -689       C  
ATOM    318  CG  LYS A 911      58.691 120.698  27.006  1.00 24.08           C  
ANISOU  318  CG  LYS A 911     3316   3581   2251     75  -1375   -809       C  
ATOM    319  CD  LYS A 911      60.069 120.219  27.424  1.00 32.12           C  
ANISOU  319  CD  LYS A 911     5472   4091   2642   -506  -1445   -937       C  
ATOM    320  CE  LYS A 911      61.046 121.380  27.523  1.00 37.39           C  
ANISOU  320  CE  LYS A 911     6773   4465   2970   -420  -1372   -954       C  
ATOM    321  NZ  LYS A 911      60.542 122.463  28.409  1.00 40.30           N  
ANISOU  321  NZ  LYS A 911     7222   4776   3314   -643  -1550   -862       N  
ATOM    322  N   ASN A 912      55.094 118.583  24.446  1.00 16.98           N  
ANISOU  322  N   ASN A 912     2520   2495   1439    -27   -585   -649       N  
ATOM    323  CA  ASN A 912      54.487 118.202  23.177  1.00 17.10           C  
ANISOU  323  CA  ASN A 912     3213   2101   1183    132   -563   -503       C  
ATOM    324  C   ASN A 912      53.627 119.317  22.598  1.00 15.39           C  
ANISOU  324  C   ASN A 912     2756   2063   1030    317    521   -364       C  
ATOM    325  O   ASN A 912      53.366 119.319  21.391  1.00 17.05           O  
ANISOU  325  O   ASN A 912     3323   2199    958    516   -106   -308       O  
ATOM    326  CB  ASN A 912      53.664 116.922  23.328  1.00 18.24           C  
ANISOU  326  CB  ASN A 912     3519   2087   1325    762   -484   -413       C  
ATOM    327  CG  ASN A 912      54.493 115.671  23.117  1.00 19.02           C  
ANISOU  327  CG  ASN A 912     3595   2178   1452    445   -727   -638       C  
ATOM    328  OD1 ASN A 912      54.908 115.370  21.998  1.00 21.01           O  
ANISOU  328  OD1 ASN A 912     3963   2441   1578    327   -500   -826       O  
ATOM    329  ND2 ASN A 912      54.733 114.931  24.193  1.00 21.69           N  
ANISOU  329  ND2 ASN A 912     4474   2295   1472    210   -527    -54       N  
ATOM    330  N   GLN A 913      53.189 120.263  23.426  1.00 14.55           N  
ANISOU  330  N   GLN A 913     2732   2070    726    293    154     41       N  
ATOM    331  CA  GLN A 913      52.394 121.393  22.958  1.00 15.20           C  
ANISOU  331  CA  GLN A 913     2701   2126    947    307    563   -170       C  
ATOM    332  C   GLN A 913      53.338 122.451  22.399  1.00 16.53           C  
ANISOU  332  C   GLN A 913     2940   2289   1052   -483   -154   -540       C  
ATOM    333  O   GLN A 913      54.133 123.043  23.138  1.00 17.30           O  
ANISOU  333  O   GLN A 913     3026   2656    893   -503   -113   -224       O  
ATOM    334  CB  GLN A 913      51.534 121.933  24.097  1.00 17.05           C  
ANISOU  334  CB  GLN A 913     3105   2367   1005    334    225    -32       C  
ATOM    335  CG  GLN A 913      50.635 120.867  24.710  1.00 16.59           C  
ANISOU  335  CG  GLN A 913     2571   2713   1019     58    666    174       C  
ATOM    336  CD  GLN A 913      49.561 121.434  25.616  1.00 18.40           C  
ANISOU  336  CD  GLN A 913     3045   2902   1046   -407    190    453       C  
ATOM    337  OE1 GLN A 913      48.495 120.838  25.777  1.00 20.65           O  
ANISOU  337  OE1 GLN A 913     3659   3057   1131   -696    -97    430       O  
ATOM    338  NE2 GLN A 913      49.837 122.584  26.219  1.00 20.62           N  
ANISOU  338  NE2 GLN A 913     3860   2856   1118   -456   -387   -233       N  
ATOM    339  N   ILE A 914      53.253 122.683  21.091  1.00 15.43           N  
ANISOU  339  N   ILE A 914     2644   2131   1087   -234    466   -123       N  
ATOM    340  CA  ILE A 914      54.201 123.508  20.352  1.00 13.27           C  
ANISOU  340  CA  ILE A 914     2059   1734   1248     37    -18   -289       C  
ATOM    341  C   ILE A 914      53.499 124.793  19.938  1.00 14.74           C  
ANISOU  341  C   ILE A 914     2717   1516   1368    292    387   -387       C  
ATOM    342  O   ILE A 914      52.390 124.751  19.393  1.00 13.93           O  
ANISOU  342  O   ILE A 914     1987   1897   1409     71    113   -208       O  
ATOM    343  CB  ILE A 914      54.721 122.757  19.114  1.00 13.62           C  
ANISOU  343  CB  ILE A 914     2473   1600   1102    487    333   -415       C  
ATOM    344  CG1 ILE A 914      55.373 121.434  19.526  1.00 16.17           C  
ANISOU  344  CG1 ILE A 914     3080   1550   1513    574    283   -450       C  
ATOM    345  CG2 ILE A 914      55.689 123.622  18.327  1.00 15.92           C  
ANISOU  345  CG2 ILE A 914     3192   1737   1119    -56    565     21       C  
ATOM    346  CD1 ILE A 914      55.673 120.515  18.362  1.00 20.16           C  
ANISOU  346  CD1 ILE A 914     3925   2171   1563    598    469   -395       C  
ATOM    347  N   GLN A 915      54.145 125.929  20.184  1.00 13.87           N  
ANISOU  347  N   GLN A 915     2910   1216   1146    452    130   -311       N  
ATOM    348  CA  GLN A 915      53.607 127.234  19.822  1.00 14.43           C  
ANISOU  348  CA  GLN A 915     2862   1610   1010    320    199   -429       C  
ATOM    349  C   GLN A 915      54.403 127.807  18.657  1.00 15.23           C  
ANISOU  349  C   GLN A 915     2567   2141   1077     62   -203   -291       C  
ATOM    350  O   GLN A 915      55.632 127.916  18.732  1.00 16.03           O  
ANISOU  350  O   GLN A 915     2895   2092   1105   -425   -219    -52       O  
ATOM    351  CB  GLN A 915      53.653 128.197  21.009  1.00 17.01           C  
ANISOU  351  CB  GLN A 915     3315   1760   1388    179    397   -624       C  
ATOM    352  CG  GLN A 915      52.888 129.490  20.777  1.00 17.19           C  
ANISOU  352  CG  GLN A 915     3171   1997   1364    171    391   -726       C  
ATOM    353  CD  GLN A 915      52.876 130.389  21.997  1.00 19.72           C  
ANISOU  353  CD  GLN A 915     3864   2245   1385    119    118   -500       C  
ATOM    354  OE1 GLN A 915      53.746 130.291  22.862  1.00 20.32           O  
ANISOU  354  OE1 GLN A 915     3653   2446   1622   -375   -338   -112       O  
ATOM    355  NE2 GLN A 915      51.887 131.271  22.073  1.00 20.45           N  
ANISOU  355  NE2 GLN A 915     4086   2259   1426    422   -119   -479       N  
ATOM    356  N   LEU A 916      53.700 128.174  17.588  1.00 16.03           N  
ANISOU  356  N   LEU A 916     2962   2267    862     92     -9   -129       N  
ATOM    357  CA  LEU A 916      54.307 128.755  16.396  1.00 13.18           C  
ANISOU  357  CA  LEU A 916     2287   2054    665   -450    -24    -80       C  
ATOM    358  C   LEU A 916      53.758 130.162  16.214  1.00 13.30           C  
ANISOU  358  C   LEU A 916     2053   2071    929    -59   -284   -145       C  
ATOM    359  O   LEU A 916      52.546 130.341  16.059  1.00 14.36           O  
ANISOU  359  O   LEU A 916     2430   2114    912    -30   -361   -167       O  
ATOM    360  CB  LEU A 916      53.992 127.908  15.162  1.00 14.46           C  
ANISOU  360  CB  LEU A 916     2719   2089    685    -71     72     -7       C  
ATOM    361  CG  LEU A 916      54.499 126.465  15.170  1.00 14.27           C  
ANISOU  361  CG  LEU A 916     2141   2111   1170    137   -260    -60       C  
ATOM    362  CD1 LEU A 916      54.074 125.743  13.902  1.00 16.92           C  
ANISOU  362  CD1 LEU A 916     2827   2377   1223    207   -560   -122       C  
ATOM    363  CD2 LEU A 916      56.011 126.431  15.329  1.00 17.89           C  
ANISOU  363  CD2 LEU A 916     2950   2284   1566   -311   -268    118       C  
ATOM    364  N   PHE A 917      54.645 131.151  16.231  1.00 16.05           N  
ANISOU  364  N   PHE A 917     2928   1947   1222     96   -157   -235       N  
ATOM    365  CA  PHE A 917      54.254 132.539  16.045  1.00 15.83           C  
ANISOU  365  CA  PHE A 917     2718   2009   1288   -334   -351   -150       C  
ATOM    366  C   PHE A 917      54.322 132.922  14.569  1.00 15.22           C  
ANISOU  366  C   PHE A 917     2186   1999   1599    -57   -346    -81       C  
ATOM    367  O   PHE A 917      54.782 132.158  13.718  1.00 15.99           O  
ANISOU  367  O   PHE A 917     2409   2022   1645    364    -49   -111       O  
ATOM    368  CB  PHE A 917      55.155 133.465  16.861  1.00 17.52           C  
ANISOU  368  CB  PHE A 917     3325   2226   1104   -239     53   -486       C  
ATOM    369  CG  PHE A 917      55.051 133.263  18.343  1.00 18.79           C  
ANISOU  369  CG  PHE A 917     3325   2743   1072   -237   -190   -302       C  
ATOM    370  CD1 PHE A 917      54.055 133.892  19.072  1.00 21.61           C  
ANISOU  370  CD1 PHE A 917     3961   3031   1219   -177    514   -474       C  
ATOM    371  CD2 PHE A 917      55.952 132.451  19.009  1.00 21.34           C  
ANISOU  371  CD2 PHE A 917     4100   2797   1209    195    180   -411       C  
ATOM    372  CE1 PHE A 917      53.958 133.710  20.439  1.00 22.88           C  
ANISOU  372  CE1 PHE A 917     4339   3154   1200   -335    337   -333       C  
ATOM    373  CE2 PHE A 917      55.861 132.266  20.374  1.00 23.13           C  
ANISOU  373  CE2 PHE A 917     4605   2891   1292   -265    399   -299       C  
ATOM    374  CZ  PHE A 917      54.863 132.897  21.090  1.00 23.22           C  
ANISOU  374  CZ  PHE A 917     4559   2995   1268   -243    333   -392       C  
ATOM    375  N   ASN A 918      53.860 134.137  14.273  1.00 16.60           N  
ANISOU  375  N   ASN A 918     2622   2127   1557    162    102    202       N  
ATOM    376  CA  ASN A 918      53.935 134.687  12.920  1.00 17.85           C  
ANISOU  376  CA  ASN A 918     2621   2373   1789    293     70    311       C  
ATOM    377  C   ASN A 918      55.316 135.304  12.682  1.00 16.65           C  
ANISOU  377  C   ASN A 918     2126   2534   1668    246     25    267       C  
ATOM    378  O   ASN A 918      55.475 136.505  12.464  1.00 21.70           O  
ANISOU  378  O   ASN A 918     3303   2872   2068    155    406   -170       O  
ATOM    379  CB  ASN A 918      52.815 135.693  12.689  1.00 17.68           C  
ANISOU  379  CB  ASN A 918     2625   2284   1808    322   -157    543       C  
ATOM    380  CG  ASN A 918      52.575 135.969  11.217  1.00 16.25           C  
ANISOU  380  CG  ASN A 918     2013   2369   1792   -227     93    159       C  
ATOM    381  OD1 ASN A 918      53.382 135.602  10.363  1.00 17.76           O  
ANISOU  381  OD1 ASN A 918     2242   2714   1794     76    508    -67       O  
ATOM    382  ND2 ASN A 918      51.459 136.622  10.911  1.00 16.63           N  
ANISOU  382  ND2 ASN A 918     2389   2356   1572     69   -307     94       N  
ATOM    383  N   LEU A 919      56.329 134.443  12.741  1.00 17.35           N  
ANISOU  383  N   LEU A 919     2558   2476   1557    270    209   -213       N  
ATOM    384  CA  LEU A 919      57.713 134.843  12.543  1.00 17.07           C  
ANISOU  384  CA  LEU A 919     2524   2384   1577    -68    207     -3       C  
ATOM    385  C   LEU A 919      58.391 133.834  11.630  1.00 16.19           C  
ANISOU  385  C   LEU A 919     1587   2596   1967   -262    -94   -236       C  
ATOM    386  O   LEU A 919      58.053 132.647  11.632  1.00 18.77           O  
ANISOU  386  O   LEU A 919     2669   2308   2155    -61     -7   -241       O  
ATOM    387  CB  LEU A 919      58.473 134.928  13.875  1.00 17.27           C  
ANISOU  387  CB  LEU A 919     2724   2303   1533    -71    -17   -400       C  
ATOM    388  CG  LEU A 919      57.948 135.938  14.898  1.00 20.34           C  
ANISOU  388  CG  LEU A 919     3598   2293   1837    200   -406   -306       C  
ATOM    389  CD1 LEU A 919      58.644 135.759  16.239  1.00 22.81           C  
ANISOU  389  CD1 LEU A 919     4355   2363   1949    170   -417   -424       C  
ATOM    390  CD2 LEU A 919      58.123 137.359  14.386  1.00 21.68           C  
ANISOU  390  CD2 LEU A 919     3780   2208   2250    136   -398   -325       C  
ATOM    391  N   GLU A 920      59.358 134.322  10.847  1.00 17.70           N  
ANISOU  391  N   GLU A 920     1830   2818   2077    -84   -113     78       N  
ATOM    392  CA  GLU A 920      60.040 133.464   9.883  1.00 21.20           C  
ANISOU  392  CA  GLU A 920     2824   3093   2137    134    138    116       C  
ATOM    393  C   GLU A 920      60.774 132.321  10.573  1.00 19.93           C  
ANISOU  393  C   GLU A 920     2586   2914   2072    248    158   -136       C  
ATOM    394  O   GLU A 920      60.808 131.196  10.060  1.00 20.34           O  
ANISOU  394  O   GLU A 920     2513   3059   2156    423    -93   -368       O  
ATOM    395  CB  GLU A 920      61.006 134.298   9.039  1.00 28.01           C  
ANISOU  395  CB  GLU A 920     4716   3490   2435     49    102    290       C  
ATOM    396  CG  GLU A 920      61.844 133.495   8.056  1.00 35.17           C  
ANISOU  396  CG  GLU A 920     6623   3884   2857    -32   -239    271       C  
ATOM    397  CD  GLU A 920      61.002 132.756   7.035  1.00 42.23           C  
ANISOU  397  CD  GLU A 920     8519   4246   3279    -71   -293    196       C  
ATOM    398  OE1 GLU A 920      61.301 131.575   6.759  1.00 45.27           O  
ANISOU  398  OE1 GLU A 920     9403   4305   3492    -97     24   -106       O  
ATOM    399  OE2 GLU A 920      60.041 133.355   6.509  1.00 42.72           O  
ANISOU  399  OE2 GLU A 920     8381   4522   3330     82   -484    416       O  
ATOM    400  N   SER A 921      61.360 132.584  11.738  1.00 18.47           N  
ANISOU  400  N   SER A 921     2315   2817   1885    194     25    -12       N  
ATOM    401  CA  SER A 921      62.131 131.583  12.463  1.00 18.00           C  
ANISOU  401  CA  SER A 921     2379   2543   1917   -142   -189   -384       C  
ATOM    402  C   SER A 921      61.290 130.753  13.426  1.00 14.72           C  
ANISOU  402  C   SER A 921     1289   2581   1722    282   -116   -408       C  
ATOM    403  O   SER A 921      61.849 129.934  14.163  1.00 17.38           O  
ANISOU  403  O   SER A 921     2525   2496   1582    110     20    -59       O  
ATOM    404  CB  SER A 921      63.294 132.243  13.210  1.00 21.27           C  
ANISOU  404  CB  SER A 921     3189   2712   2179   -338   -548   -502       C  
ATOM    405  OG  SER A 921      62.830 133.269  14.067  1.00 21.84           O  
ANISOU  405  OG  SER A 921     3241   2921   2134   -149    348   -916       O  
ATOM    406  N   SER A 922      59.971 130.940  13.443  1.00 14.19           N  
ANISOU  406  N   SER A 922     1688   2250   1452    -88    111   -557       N  
ATOM    407  CA  SER A 922      59.080 130.120  14.264  1.00 15.80           C  
ANISOU  407  CA  SER A 922     2487   2231   1286   -142    284   -545       C  
ATOM    408  C   SER A 922      58.467 129.060  13.354  1.00 17.20           C  
ANISOU  408  C   SER A 922     2807   2199   1529   -236    202   -583       C  
ATOM    409  O   SER A 922      57.325 129.162  12.906  1.00 16.92           O  
ANISOU  409  O   SER A 922     2506   2162   1761     68   -334   -655       O  
ATOM    410  CB  SER A 922      58.019 130.986  14.937  1.00 14.36           C  
ANISOU  410  CB  SER A 922     2445   2085    925   -422    565     67       C  
ATOM    411  OG  SER A 922      57.253 130.229  15.859  1.00 14.78           O  
ANISOU  411  OG  SER A 922     2588   1710   1318   -569    235   -327       O  
ATOM    412  N   LYS A 923      59.254 128.022  13.077  1.00 15.35           N  
ANISOU  412  N   LYS A 923     2648   2075   1111    -99   -100   -621       N  
ATOM    413  CA  LYS A 923      58.854 127.011  12.111  1.00 13.91           C  
ANISOU  413  CA  LYS A 923     2154   1956   1175    -24   -238   -290       C  
ATOM    414  C   LYS A 923      59.496 125.678  12.461  1.00 15.38           C  
ANISOU  414  C   LYS A 923     2507   2025   1311    226   -417   -492       C  
ATOM    415  O   LYS A 923      60.517 125.615  13.150  1.00 16.91           O  
ANISOU  415  O   LYS A 923     2686   2437   1302     27   -328   -519       O  
ATOM    416  CB  LYS A 923      59.243 127.419  10.684  1.00 15.69           C  
ANISOU  416  CB  LYS A 923     2122   2601   1240      0    132    -70       C  
ATOM    417  CG  LYS A 923      60.733 127.662  10.501  1.00 18.97           C  
ANISOU  417  CG  LYS A 923     2862   2999   1347   -297   -124   -231       C  
ATOM    418  CD  LYS A 923      61.062 128.059   9.071  1.00 24.49           C  
ANISOU  418  CD  LYS A 923     4338   3333   1636   -327    420   -402       C  
ATOM    419  CE  LYS A 923      62.543 128.365   8.914  1.00 24.85           C  
ANISOU  419  CE  LYS A 923     4093   3546   1802    141   1076   -411       C  
ATOM    420  NZ  LYS A 923      62.881 128.785   7.525  1.00 27.75           N  
ANISOU  420  NZ  LYS A 923     4792   3656   2096    146   1148   -479       N  
ATOM    421  N   ILE A 924      58.876 124.607  11.970  1.00 14.78           N  
ANISOU  421  N   ILE A 924     2396   2051   1170    167   -222   -291       N  
ATOM    422  CA  ILE A 924      59.390 123.250  12.099  1.00 15.13           C  
ANISOU  422  CA  ILE A 924     2625   2031   1091    -80    -16   -568       C  
ATOM    423  C   ILE A 924      59.331 122.599  10.726  1.00 17.70           C  
ANISOU  423  C   ILE A 924     3393   2136   1196     17   -280   -627       C  
ATOM    424  O   ILE A 924      58.269 122.573  10.093  1.00 15.77           O  
ANISOU  424  O   ILE A 924     2722   2218   1051    -42    -99   -548       O  
ATOM    425  CB  ILE A 924      58.576 122.425  13.116  1.00 16.87           C  
ANISOU  425  CB  ILE A 924     2782   2227   1401   -469    564   -484       C  
ATOM    426  CG1 ILE A 924      58.673 123.042  14.513  1.00 18.58           C  
ANISOU  426  CG1 ILE A 924     2868   2603   1588   -957    847   -398       C  
ATOM    427  CG2 ILE A 924      59.051 120.980  13.132  1.00 16.41           C  
ANISOU  427  CG2 ILE A 924     2485   2425   1323    164    221   -783       C  
ATOM    428  CD1 ILE A 924      57.826 122.334  15.548  1.00 21.01           C  
ANISOU  428  CD1 ILE A 924     3411   2746   1827   -535    805    -46       C  
ATOM    429  N   GLU A 925      60.465 122.080  10.263  1.00 16.79           N  
ANISOU  429  N   GLU A 925     2733   2523   1122    438    207   -509       N  
ATOM    430  CA  GLU A 925      60.556 121.427   8.964  1.00 17.78           C  
ANISOU  430  CA  GLU A 925     2939   2540   1275    329    753   -450       C  
ATOM    431  C   GLU A 925      60.920 119.963   9.158  1.00 17.74           C  
ANISOU  431  C   GLU A 925     3076   2341   1323    595    238   -575       C  
ATOM    432  O   GLU A 925      61.913 119.648   9.821  1.00 18.17           O  
ANISOU  432  O   GLU A 925     2521   2535   1849    670   -177   -474       O  
ATOM    433  CB  GLU A 925      61.599 122.107   8.073  1.00 18.12           C  
ANISOU  433  CB  GLU A 925     3013   2959    913     12    383   -384       C  
ATOM    434  CG  GLU A 925      61.655 121.543   6.662  1.00 24.25           C  
ANISOU  434  CG  GLU A 925     4347   3487   1381   -414    782   -247       C  
ATOM    435  CD  GLU A 925      62.724 122.198   5.810  1.00 30.10           C  
ANISOU  435  CD  GLU A 925     5645   3988   1802  -1064    891   -398       C  
ATOM    436  OE1 GLU A 925      63.714 122.703   6.378  1.00 32.94           O  
ANISOU  436  OE1 GLU A 925     6047   4237   2231  -1531   1258   -674       O  
ATOM    437  OE2 GLU A 925      62.572 122.209   4.570  1.00 34.22           O  
ANISOU  437  OE2 GLU A 925     6826   4215   1960  -1004    799   -112       O  
ATOM    438  N   VAL A 926      60.116 119.078   8.578  1.00 16.09           N  
ANISOU  438  N   VAL A 926     2520   2073   1519    452     39   -670       N  
ATOM    439  CA  VAL A 926      60.362 117.641   8.611  1.00 16.67           C  
ANISOU  439  CA  VAL A 926     2810   1975   1550    -50    103   -696       C  
ATOM    440  C   VAL A 926      60.902 117.231   7.249  1.00 17.69           C  
ANISOU  440  C   VAL A 926     3076   2172   1474    -69   -293   -939       C  
ATOM    441  O   VAL A 926      60.219 117.389   6.231  1.00 17.88           O  
ANISOU  441  O   VAL A 926     2934   2586   1276    342   -421   -779       O  
ATOM    442  CB  VAL A 926      59.079 116.864   8.943  1.00 15.01           C  
ANISOU  442  CB  VAL A 926     2444   1455   1805    120    -13   -672       C  
ATOM    443  CG1 VAL A 926      59.366 115.368   9.007  1.00 16.50           C  
ANISOU  443  CG1 VAL A 926     3011   1399   1861    277    116   -466       C  
ATOM    444  CG2 VAL A 926      58.475 117.362  10.245  1.00 16.87           C  
ANISOU  444  CG2 VAL A 926     2418   2085   1906    355     66   -573       C  
ATOM    445  N   ILE A 927      62.126 116.708   7.224  1.00 17.69           N  
ANISOU  445  N   ILE A 927     2838   2211   1674   -132   -113  -1063       N  
ATOM    446  CA  ILE A 927      62.731 116.202   5.996  1.00 18.41           C  
ANISOU  446  CA  ILE A 927     2411   2560   2022   -196      0  -1135       C  
ATOM    447  C   ILE A 927      62.327 114.736   5.878  1.00 19.17           C  
ANISOU  447  C   ILE A 927     2713   2740   1829   -153     60  -1148       C  
ATOM    448  O   ILE A 927      62.893 113.867   6.542  1.00 20.46           O  
ANISOU  448  O   ILE A 927     3539   2827   1407    485   -299   -753       O  
ATOM    449  CB  ILE A 927      64.250 116.379   5.993  1.00 20.61           C  
ANISOU  449  CB  ILE A 927     2469   2995   2369    -77    823  -1218       C  
ATOM    450  CG1 ILE A 927      64.625 117.801   6.414  1.00 26.97           C  
ANISOU  450  CG1 ILE A 927     4339   3210   2699   -168    400  -1243       C  
ATOM    451  CG2 ILE A 927      64.817 116.065   4.616  1.00 25.51           C  
ANISOU  451  CG2 ILE A 927     4105   3056   2532   -239    642  -1105       C  
ATOM    452  CD1 ILE A 927      64.118 118.872   5.477  1.00 28.91           C  
ANISOU  452  CD1 ILE A 927     4678   3509   2799   -458    -75  -1017       C  
ATOM    453  N   LEU A 928      61.341 114.462   5.027  1.00 19.27           N  
ANISOU  453  N   LEU A 928     2754   2829   1739   -242    -64  -1110       N  
ATOM    454  CA  LEU A 928      60.818 113.110   4.897  1.00 16.55           C  
ANISOU  454  CA  LEU A 928     1815   2713   1762    119   -216   -948       C  
ATOM    455  C   LEU A 928      61.844 112.197   4.241  1.00 19.38           C  
ANISOU  455  C   LEU A 928     3193   2323   1848     87   -199   -579       C  
ATOM    456  O   LEU A 928      62.544 112.591   3.304  1.00 20.10           O  
ANISOU  456  O   LEU A 928     2905   2358   2374    272    -97   -430       O  
ATOM    457  CB  LEU A 928      59.547 113.122   4.049  1.00 18.17           C  
ANISOU  457  CB  LEU A 928     2379   2677   1848     78     37   -843       C  
ATOM    458  CG  LEU A 928      58.349 113.906   4.586  1.00 17.79           C  
ANISOU  458  CG  LEU A 928     2393   2558   1809    134   -193   -856       C  
ATOM    459  CD1 LEU A 928      57.234 113.944   3.550  1.00 18.57           C  
ANISOU  459  CD1 LEU A 928     2514   2619   1922    447  -1015   -604       C  
ATOM    460  CD2 LEU A 928      57.855 113.297   5.887  1.00 19.28           C  
ANISOU  460  CD2 LEU A 928     2959   2380   1987     27    438   -860       C  
ATOM    461  N   LYS A 929      61.935 110.968   4.746  1.00 18.48           N  
ANISOU  461  N   LYS A 929     3374   2195   1452    611     -4   -476       N  
ATOM    462  CA  LYS A 929      62.692 109.942   4.047  1.00 16.43           C  
ANISOU  462  CA  LYS A 929     2879   2012   1351    881    -43   -617       C  
ATOM    463  C   LYS A 929      62.076 109.711   2.672  1.00 16.51           C  
ANISOU  463  C   LYS A 929     2868   2046   1359    684     88   -696       C  
ATOM    464  O   LYS A 929      60.862 109.829   2.483  1.00 17.27           O  
ANISOU  464  O   LYS A 929     3055   1991   1516    322    -68   -581       O  
ATOM    465  CB  LYS A 929      62.685 108.640   4.847  1.00 16.73           C  
ANISOU  465  CB  LYS A 929     2553   2379   1426    692   -575   -425       C  
ATOM    466  CG  LYS A 929      63.484 108.695   6.143  1.00 19.20           C  
ANISOU  466  CG  LYS A 929     2864   2665   1765    303   -382   -349       C  
ATOM    467  CD  LYS A 929      64.964 108.923   5.872  1.00 21.95           C  
ANISOU  467  CD  LYS A 929     3255   3091   1995     88   -566   -604       C  
ATOM    468  CE  LYS A 929      65.793 108.766   7.138  1.00 25.03           C  
ANISOU  468  CE  LYS A 929     3851   3503   2158     35   -222  -1046       C  
ATOM    469  NZ  LYS A 929      65.404 109.744   8.191  1.00 27.81           N  
ANISOU  469  NZ  LYS A 929     4350   3836   2379    118   -296   -900       N  
ATOM    470  N   ASN A 930      62.932 109.384   1.701  1.00 18.14           N  
ANISOU  470  N   ASN A 930     2885   2554   1453    328    362   -696       N  
ATOM    471  CA  ASN A 930      62.484 109.306   0.313  1.00 18.45           C  
ANISOU  471  CA  ASN A 930     3089   2770   1150    265    213   -497       C  
ATOM    472  C   ASN A 930      61.379 108.274   0.121  1.00 19.15           C  
ANISOU  472  C   ASN A 930     3299   2908   1069   -174    577   -343       C  
ATOM    473  O   ASN A 930      60.538 108.428  -0.773  1.00 22.40           O  
ANISOU  473  O   ASN A 930     3897   3246   1370   -275     37   -359       O  
ATOM    474  CB  ASN A 930      63.669 109.008  -0.606  1.00 20.25           C  
ANISOU  474  CB  ASN A 930     3261   2940   1494    995    294   -146       C  
ATOM    475  CG  ASN A 930      63.255 108.840  -2.054  1.00 30.49           C  
ANISOU  475  CG  ASN A 930     5322   3545   2719    291    278    277       C  
ATOM    476  OD1 ASN A 930      63.303 107.738  -2.601  1.00 34.73           O  
ANISOU  476  OD1 ASN A 930     6217   3815   3165   -197    319    192       O  
ATOM    477  ND2 ASN A 930      62.837 109.933  -2.681  1.00 33.54           N  
ANISOU  477  ND2 ASN A 930     5897   3738   3110    -64    449    683       N  
ATOM    478  N   ALA A 931      61.351 107.230   0.952  1.00 17.35           N  
ANISOU  478  N   ALA A 931     3008   2618    967    155    413   -396       N  
ATOM    479  CA  ALA A 931      60.373 106.164   0.766  1.00 17.34           C  
ANISOU  479  CA  ALA A 931     2779   2784   1026    -96    -44   -275       C  
ATOM    480  C   ALA A 931      58.947 106.634   1.031  1.00 18.39           C  
ANISOU  480  C   ALA A 931     2457   3242   1287     19   -135   -495       C  
ATOM    481  O   ALA A 931      57.999 106.052   0.489  1.00 22.50           O  
ANISOU  481  O   ALA A 931     3696   3279   1576    761   -407   -775       O  
ATOM    482  CB  ALA A 931      60.717 104.968   1.654  1.00 18.61           C  
ANISOU  482  CB  ALA A 931     3402   2589   1079    254   -574    242       C  
ATOM    483  N   ILE A 932      58.768 107.672   1.846  1.00 20.32           N  
ANISOU  483  N   ILE A 932     3081   3468   1172    304   -241   -521       N  
ATOM    484  CA  ILE A 932      57.440 108.136   2.231  1.00 20.99           C  
ANISOU  484  CA  ILE A 932     3083   3657   1237    112   -422   -706       C  
ATOM    485  C   ILE A 932      57.073 109.464   1.581  1.00 21.66           C  
ANISOU  485  C   ILE A 932     3095   3714   1420    281   -116   -894       C  
ATOM    486  O   ILE A 932      56.050 110.060   1.937  1.00 23.03           O  
ANISOU  486  O   ILE A 932     2667   4211   1871    450    145   -786       O  
ATOM    487  CB  ILE A 932      57.245 108.169   3.757  1.00 21.03           C  
ANISOU  487  CB  ILE A 932     3109   3692   1188    -69   -291   -646       C  
ATOM    488  CG1 ILE A 932      58.301 109.057   4.417  1.00 20.04           C  
ANISOU  488  CG1 ILE A 932     2881   3480   1252   -290    -15   -848       C  
ATOM    489  CG2 ILE A 932      57.281 106.762   4.325  1.00 22.02           C  
ANISOU  489  CG2 ILE A 932     3094   3544   1729   -252   -267   -529       C  
ATOM    490  CD1 ILE A 932      58.125 109.197   5.914  1.00 21.43           C  
ANISOU  490  CD1 ILE A 932     3326   3545   1270    -61   -160   -875       C  
ATOM    491  N   VAL A 933      57.880 109.950   0.641  1.00 18.30           N  
ANISOU  491  N   VAL A 933     2520   3348   1086    473   -225   -551       N  
ATOM    492  CA  VAL A 933      57.487 111.116  -0.143  1.00 17.70           C  
ANISOU  492  CA  VAL A 933     2390   3090   1245   -458    -61   -241       C  
ATOM    493  C   VAL A 933      56.316 110.720  -1.032  1.00 18.37           C  
ANISOU  493  C   VAL A 933     2834   3056   1091   -344    234   -569       C  
ATOM    494  O   VAL A 933      56.405 109.762  -1.809  1.00 22.95           O  
ANISOU  494  O   VAL A 933     4111   2942   1667    202    -47   -786       O  
ATOM    495  CB  VAL A 933      58.667 111.646  -0.967  1.00 18.17           C  
ANISOU  495  CB  VAL A 933     2722   2899   1284    -91   -299   -237       C  
ATOM    496  CG1 VAL A 933      58.201 112.744  -1.913  1.00 19.61           C  
ANISOU  496  CG1 VAL A 933     2885   2977   1590   -383   -479    -42       C  
ATOM    497  CG2 VAL A 933      59.765 112.161  -0.047  1.00 19.42           C  
ANISOU  497  CG2 VAL A 933     3325   2721   1332    -78   -424   -394       C  
ATOM    498  N   TYR A 934      55.207 111.447  -0.914  1.00 17.09           N  
ANISOU  498  N   TYR A 934     2707   2789    997    118     36   -418       N  
ATOM    499  CA  TYR A 934      53.988 111.069  -1.614  1.00 15.55           C  
ANISOU  499  CA  TYR A 934     2181   2871    857   -148   -130   -445       C  
ATOM    500  C   TYR A 934      54.078 111.440  -3.088  1.00 15.08           C  
ANISOU  500  C   TYR A 934     1965   2841    922   -157    323   -464       C  
ATOM    501  O   TYR A 934      54.319 112.600  -3.436  1.00 18.14           O  
ANISOU  501  O   TYR A 934     3188   2582   1121    -91   -260   -311       O  
ATOM    502  CB  TYR A 934      52.765 111.733  -0.980  1.00 14.84           C  
ANISOU  502  CB  TYR A 934     1669   3013    958    218     36    -50       C  
ATOM    503  CG  TYR A 934      51.456 111.148  -1.465  1.00 17.17           C  
ANISOU  503  CG  TYR A 934     2538   2716   1268   -309    -86    -32       C  
ATOM    504  CD1 TYR A 934      50.871 111.584  -2.648  1.00 17.12           C  
ANISOU  504  CD1 TYR A 934     2676   2574   1257   -186    -92     64       C  
ATOM    505  CD2 TYR A 934      50.813 110.147  -0.748  1.00 14.59           C  
ANISOU  505  CD2 TYR A 934     1979   2469   1095    166    192   -176       C  
ATOM    506  CE1 TYR A 934      49.683 111.046  -3.100  1.00 15.50           C  
ANISOU  506  CE1 TYR A 934     2385   2225   1280   -388    119   -344       C  
ATOM    507  CE2 TYR A 934      49.620 109.603  -1.191  1.00 14.96           C  
ANISOU  507  CE2 TYR A 934     2313   2004   1367     89   -168   -290       C  
ATOM    508  CZ  TYR A 934      49.061 110.057  -2.368  1.00 15.34           C  
ANISOU  508  CZ  TYR A 934     2317   2111   1400   -215    -34   -223       C  
ATOM    509  OH  TYR A 934      47.876 109.522  -2.818  1.00 16.66           O  
ANISOU  509  OH  TYR A 934     2638   2303   1390   -223     58    -61       O  
ATOM    510  N   ASN A 935      53.872 110.445  -3.952  1.00 16.20           N  
ANISOU  510  N   ASN A 935     2590   2641    924   -232      6   -537       N  
ATOM    511  CA  ASN A 935      53.832 110.669  -5.399  1.00 15.29           C  
ANISOU  511  CA  ASN A 935     2172   2523   1113   -800    604   -352       C  
ATOM    512  C   ASN A 935      53.039 109.496  -5.984  1.00 15.82           C  
ANISOU  512  C   ASN A 935     2323   2546   1142   -343    520   -665       C  
ATOM    513  O   ASN A 935      53.616 108.473  -6.352  1.00 18.25           O  
ANISOU  513  O   ASN A 935     2501   2726   1708    -76    269   -792       O  
ATOM    514  CB  ASN A 935      55.223 110.753  -5.994  1.00 18.71           C  
ANISOU  514  CB  ASN A 935     3049   2859   1199   -475    356   -392       C  
ATOM    515  CG  ASN A 935      55.202 111.016  -7.487  1.00 21.76           C  
ANISOU  515  CG  ASN A 935     3600   3116   1553   -115    468   -300       C  
ATOM    516  OD1 ASN A 935      54.209 111.498  -8.031  1.00 21.22           O  
ANISOU  516  OD1 ASN A 935     3582   2983   1499     20    308    159       O  
ATOM    517  ND2 ASN A 935      56.303 110.699  -8.159  1.00 23.63           N  
ANISOU  517  ND2 ASN A 935     3677   3425   1875     38    413   -479       N  
ATOM    518  N   SER A 936      51.720 109.661  -6.055  1.00 15.91           N  
ANISOU  518  N   SER A 936     2607   2476    962   -103    478   -480       N  
ATOM    519  CA  SER A 936      50.858 108.544  -6.411  1.00 16.31           C  
ANISOU  519  CA  SER A 936     2732   2293   1171   -169    -96   -374       C  
ATOM    520  C   SER A 936      49.521 109.058  -6.922  1.00 15.61           C  
ANISOU  520  C   SER A 936     2983   1897   1051   -118     16   -466       C  
ATOM    521  O   SER A 936      49.101 110.177  -6.616  1.00 16.17           O  
ANISOU  521  O   SER A 936     3163   1928   1051   -127   -281     74       O  
ATOM    522  CB  SER A 936      50.637 107.614  -5.212  1.00 16.13           C  
ANISOU  522  CB  SER A 936     3118   2142    871   -241    362   -120       C  
ATOM    523  OG  SER A 936      49.685 106.609  -5.512  1.00 16.28           O  
ANISOU  523  OG  SER A 936     2989   2229    967   -380    214   -144       O  
ATOM    524  N   MET A 937      48.861 108.211  -7.713  1.00 14.04           N  
ANISOU  524  N   MET A 937     2309   2209    815    -41   -117   -286       N  
ATOM    525  CA  MET A 937      47.481 108.423  -8.123  1.00 15.36           C  
ANISOU  525  CA  MET A 937     2687   2366    782   -250    228   -271       C  
ATOM    526  C   MET A 937      46.492 107.617  -7.294  1.00 17.56           C  
ANISOU  526  C   MET A 937     3131   2379   1163     66    770   -264       C  
ATOM    527  O   MET A 937      45.281 107.804  -7.453  1.00 18.54           O  
ANISOU  527  O   MET A 937     3437   2342   1267    196    208   -215       O  
ATOM    528  CB  MET A 937      47.297 108.031  -9.597  1.00 16.22           C  
ANISOU  528  CB  MET A 937     2443   2810    911   -467    330   -358       C  
ATOM    529  CG  MET A 937      48.243 108.708 -10.572  1.00 22.66           C  
ANISOU  529  CG  MET A 937     4007   3294   1308   -833    291   -554       C  
ATOM    530  SD  MET A 937      47.942 108.182 -12.273  1.00 29.97           S  
ANISOU  530  SD  MET A 937     5349   4438   1599  -1231     93   -348       S  
ATOM    531  CE  MET A 937      46.218 108.632 -12.461  1.00 30.19           C  
ANISOU  531  CE  MET A 937     4983   4575   1914  -1403   -859   -217       C  
ATOM    532  N   TYR A 938      46.970 106.730  -6.419  1.00 18.73           N  
ANISOU  532  N   TYR A 938     3603   2516    997    -32     29   -393       N  
ATOM    533  CA  TYR A 938      46.093 105.741  -5.794  1.00 18.04           C  
ANISOU  533  CA  TYR A 938     3314   2596    946   -506    322    -64       C  
ATOM    534  C   TYR A 938      46.277 105.564  -4.294  1.00 15.06           C  
ANISOU  534  C   TYR A 938     1782   2983    956    275   -120   -287       C  
ATOM    535  O   TYR A 938      45.336 105.102  -3.640  1.00 17.88           O  
ANISOU  535  O   TYR A 938     2639   2996   1157   -234    499   -132       O  
ATOM    536  CB  TYR A 938      46.269 104.370  -6.462  1.00 19.41           C  
ANISOU  536  CB  TYR A 938     3856   2531    987    -26    210    -82       C  
ATOM    537  CG  TYR A 938      46.276 104.395  -7.973  1.00 21.03           C  
ANISOU  537  CG  TYR A 938     4199   2651   1143    237    458     53       C  
ATOM    538  CD1 TYR A 938      47.473 104.410  -8.679  1.00 21.79           C  
ANISOU  538  CD1 TYR A 938     4326   2505   1448   -109    903    214       C  
ATOM    539  CD2 TYR A 938      45.090 104.388  -8.694  1.00 24.06           C  
ANISOU  539  CD2 TYR A 938     5111   2697   1334   -253    201   -228       C  
ATOM    540  CE1 TYR A 938      47.487 104.428 -10.062  1.00 23.27           C  
ANISOU  540  CE1 TYR A 938     4813   2624   1405    357    730     90       C  
ATOM    541  CE2 TYR A 938      45.095 104.406 -10.077  1.00 24.72           C  
ANISOU  541  CE2 TYR A 938     5196   2760   1435   -185    358   -292       C  
ATOM    542  CZ  TYR A 938      46.296 104.426 -10.755  1.00 26.98           C  
ANISOU  542  CZ  TYR A 938     5715   3000   1538   -162    194   -261       C  
ATOM    543  OH  TYR A 938      46.304 104.443 -12.131  1.00 30.41           O  
ANISOU  543  OH  TYR A 938     6295   3495   1764   -488    143   -562       O  
ATOM    544  N   GLU A 939      47.428 105.899  -3.715  1.00 16.98           N  
ANISOU  544  N   GLU A 939     2067   3115   1270    635   -349    -99       N  
ATOM    545  CA AGLU A 939      47.669 105.569  -2.318  0.48 18.40           C  
ANISOU  545  CA AGLU A 939     2560   3170   1263    657    234    -71       C  
ATOM    546  CA BGLU A 939      47.695 105.586  -2.313  0.52 17.91           C  
ANISOU  546  CA BGLU A 939     2551   3188   1067    622    108    -97       C  
ATOM    547  C   GLU A 939      46.875 106.485  -1.394  1.00 18.37           C  
ANISOU  547  C   GLU A 939     2618   3084   1278    196    172     81       C  
ATOM    548  O   GLU A 939      46.953 107.714  -1.489  1.00 17.60           O  
ANISOU  548  O   GLU A 939     2415   2951   1320     12     51   -185       O  
ATOM    549  CB AGLU A 939      49.162 105.630  -2.004  0.48 21.62           C  
ANISOU  549  CB AGLU A 939     3166   3398   1651   1007    581    -48       C  
ATOM    550  CB BGLU A 939      49.181 105.765  -2.014  0.52 20.60           C  
ANISOU  550  CB BGLU A 939     3231   3430   1165    744    143    -55       C  
ATOM    551  CG AGLU A 939      49.949 104.512  -2.668  0.48 22.02           C  
ANISOU  551  CG AGLU A 939     3155   3408   1802   1228    832   -178       C  
ATOM    552  CG BGLU A 939      49.513 105.695  -0.530  0.52 20.09           C  
ANISOU  552  CG BGLU A 939     3154   3497    981    502   -125   -154       C  
ATOM    553  CD AGLU A 939      49.292 103.155  -2.479  0.48 22.92           C  
ANISOU  553  CD AGLU A 939     3408   3363   1937   1530    524   -417       C  
ATOM    554  CD BGLU A 939      50.859 106.308  -0.196  0.52 23.94           C  
ANISOU  554  CD BGLU A 939     4245   3689   1162    134   -365     28       C  
ATOM    555  OE1AGLU A 939      49.073 102.754  -1.316  0.48 25.15           O  
ANISOU  555  OE1AGLU A 939     4003   3440   2112   1250    903   -242       O  
ATOM    556  OE1BGLU A 939      51.663 106.528  -1.126  0.52 23.52           O  
ANISOU  556  OE1BGLU A 939     3798   3693   1446   -157    -63    255       O  
ATOM    557  OE2AGLU A 939      48.981 102.495  -3.492  0.48 22.02           O  
ANISOU  557  OE2AGLU A 939     2948   3337   2083   1701     62   -545       O  
ATOM    558  OE2BGLU A 939      51.111 106.577   0.998  0.52 25.53           O  
ANISOU  558  OE2BGLU A 939     4467   3872   1360   -226   -773     61       O  
ATOM    559  N   ASN A 940      46.106 105.872  -0.499  1.00 15.53           N  
ANISOU  559  N   ASN A 940     2219   2711    969   -276    377   -294       N  
ATOM    560  CA  ASN A 940      45.344 106.610   0.493  1.00 13.65           C  
ANISOU  560  CA  ASN A 940     1978   2410    798   -209    471     34       C  
ATOM    561  C   ASN A 940      46.261 107.035   1.634  1.00 13.66           C  
ANISOU  561  C   ASN A 940     2162   2238    790   -140   -153    104       C  
ATOM    562  O   ASN A 940      47.263 106.378   1.930  1.00 16.37           O  
ANISOU  562  O   ASN A 940     2837   2597    785    110   -254    118       O  
ATOM    563  CB  ASN A 940      44.223 105.734   1.051  1.00 13.33           C  
ANISOU  563  CB  ASN A 940     1963   2316    787   -217   -233    -19       C  
ATOM    564  CG  ASN A 940      43.306 105.200  -0.031  1.00 15.44           C  
ANISOU  564  CG  ASN A 940     2312   2322   1232    -21   -190   -232       C  
ATOM    565  OD1 ASN A 940      43.156 105.808  -1.091  1.00 18.25           O  
ANISOU  565  OD1 ASN A 940     3029   2774   1133    327   -191   -362       O  
ATOM    566  ND2 ASN A 940      42.683 104.057   0.232  1.00 18.24           N  
ANISOU  566  ND2 ASN A 940     3187   2248   1495   -436   -163   -257       N  
ATOM    567  N   PHE A 941      45.910 108.145   2.276  1.00 14.27           N  
ANISOU  567  N   PHE A 941     2523   2240    659    196    -53     40       N  
ATOM    568  CA  PHE A 941      46.715 108.646   3.381  1.00 13.24           C  
ANISOU  568  CA  PHE A 941     2122   2056    853    324    495   -220       C  
ATOM    569  C   PHE A 941      45.848 109.503   4.289  1.00 11.76           C  
ANISOU  569  C   PHE A 941     1897   1929    644    242   -134    -66       C  
ATOM    570  O   PHE A 941      44.805 110.021   3.880  1.00 12.46           O  
ANISOU  570  O   PHE A 941     2144   1963    628     62   -327     75       O  
ATOM    571  CB  PHE A 941      47.945 109.421   2.890  1.00 14.52           C  
ANISOU  571  CB  PHE A 941     2381   2180    958     19    551     80       C  
ATOM    572  CG  PHE A 941      47.623 110.753   2.271  1.00 15.91           C  
ANISOU  572  CG  PHE A 941     2622   2288   1133     54     27    -10       C  
ATOM    573  CD1 PHE A 941      47.813 111.926   2.983  1.00 16.69           C  
ANISOU  573  CD1 PHE A 941     2815   2226   1299    -64     66   -283       C  
ATOM    574  CD2 PHE A 941      47.141 110.833   0.974  1.00 17.39           C  
ANISOU  574  CD2 PHE A 941     3112   2288   1207    103   -478   -196       C  
ATOM    575  CE1 PHE A 941      47.523 113.153   2.417  1.00 16.28           C  
ANISOU  575  CE1 PHE A 941     2440   2405   1341   -418    213   -463       C  
ATOM    576  CE2 PHE A 941      46.850 112.057   0.402  1.00 17.24           C  
ANISOU  576  CE2 PHE A 941     2618   2602   1332    140    -86   -134       C  
ATOM    577  CZ  PHE A 941      47.041 113.219   1.124  1.00 16.97           C  
ANISOU  577  CZ  PHE A 941     2577   2620   1251   -162    244   -296       C  
ATOM    578  N   SER A 942      46.297 109.641   5.535  1.00 13.53           N  
ANISOU  578  N   SER A 942     2498   1719    924   -229   -231   -487       N  
ATOM    579  CA  SER A 942      45.576 110.403   6.541  1.00 14.95           C  
ANISOU  579  CA  SER A 942     2793   1917    970   -379   -289   -411       C  
ATOM    580  C   SER A 942      46.569 111.177   7.396  1.00 14.43           C  
ANISOU  580  C   SER A 942     2628   1898    956    390    -22   -530       C  
ATOM    581  O   SER A 942      47.759 110.857   7.450  1.00 15.94           O  
ANISOU  581  O   SER A 942     2562   2256   1241    327   -233   -185       O  
ATOM    582  CB  SER A 942      44.725 109.495   7.441  1.00 13.82           C  
ANISOU  582  CB  SER A 942     2470   1981    800   -719     75   -239       C  
ATOM    583  OG  SER A 942      43.811 108.724   6.681  1.00 14.19           O  
ANISOU  583  OG  SER A 942     2572   1857    961   -148   -171   -176       O  
ATOM    584  N   THR A 943      46.061 112.208   8.066  1.00 14.13           N  
ANISOU  584  N   THR A 943     2440   1986    944    -85   -116   -592       N  
ATOM    585  CA  THR A 943      46.849 112.981   9.013  1.00 13.53           C  
ANISOU  585  CA  THR A 943     2250   2013    878   -296    -23   -534       C  
ATOM    586  C   THR A 943      45.984 113.332  10.214  1.00 12.10           C  
ANISOU  586  C   THR A 943     1552   2177    870   -149     46   -410       C  
ATOM    587  O   THR A 943      44.768 113.509  10.094  1.00 14.60           O  
ANISOU  587  O   THR A 943     2128   2624    797    178     61   -437       O  
ATOM    588  CB  THR A 943      47.434 114.255   8.380  1.00 14.34           C  
ANISOU  588  CB  THR A 943     2224   2316    911   -534   -293   -363       C  
ATOM    589  OG1 THR A 943      48.231 114.949   9.348  1.00 17.96           O  
ANISOU  589  OG1 THR A 943     2609   2783   1432    194   -114   -253       O  
ATOM    590  CG2 THR A 943      46.326 115.175   7.889  1.00 12.59           C  
ANISOU  590  CG2 THR A 943     2122   2086    575    172     76     37       C  
ATOM    591  N   SER A 944      46.622 113.418  11.378  1.00 15.28           N  
ANISOU  591  N   SER A 944     2922   2017    864     65    -13   -413       N  
ATOM    592  CA  SER A 944      45.934 113.760  12.612  1.00 13.00           C  
ANISOU  592  CA  SER A 944     2125   2082    732     13     33   -374       C  
ATOM    593  C   SER A 944      46.838 114.641  13.460  1.00 13.64           C  
ANISOU  593  C   SER A 944     2533   1792    858     10   -182   -482       C  
ATOM    594  O   SER A 944      48.063 114.491  13.450  1.00 14.46           O  
ANISOU  594  O   SER A 944     2674   1817   1002     42   -141   -580       O  
ATOM    595  CB  SER A 944      45.533 112.512  13.411  1.00 14.13           C  
ANISOU  595  CB  SER A 944     1859   2670    839   -146   -185   -253       C  
ATOM    596  OG  SER A 944      46.674 111.810  13.872  1.00 16.88           O  
ANISOU  596  OG  SER A 944     2989   2648    776   -198    -74    -73       O  
ATOM    597  N   PHE A 945      46.217 115.561  14.193  1.00 14.63           N  
ANISOU  597  N   PHE A 945     3042   1516   1000    -15     74   -423       N  
ATOM    598  CA  PHE A 945      46.933 116.479  15.067  1.00 14.09           C  
ANISOU  598  CA  PHE A 945     2701   1830    822    188     87   -379       C  
ATOM    599  C   PHE A 945      45.916 117.217  15.922  1.00 14.70           C  
ANISOU  599  C   PHE A 945     2583   2126    876    144    463   -318       C  
ATOM    600  O   PHE A 945      44.728 117.274  15.594  1.00 14.34           O  
ANISOU  600  O   PHE A 945     2552   2142    756    293    -39   -277       O  
ATOM    601  CB  PHE A 945      47.781 117.480  14.270  1.00 13.43           C  
ANISOU  601  CB  PHE A 945     2328   2146    629     86    193   -139       C  
ATOM    602  CG  PHE A 945      46.993 118.299  13.284  1.00 15.15           C  
ANISOU  602  CG  PHE A 945     2544   2408    803     40    162   -150       C  
ATOM    603  CD1 PHE A 945      46.486 119.539  13.639  1.00 15.68           C  
ANISOU  603  CD1 PHE A 945     2666   2411    882    -60    112     45       C  
ATOM    604  CD2 PHE A 945      46.762 117.829  12.000  1.00 16.28           C  
ANISOU  604  CD2 PHE A 945     2801   2549    835   -333   -159   -103       C  
ATOM    605  CE1 PHE A 945      45.761 120.293  12.735  1.00 15.67           C  
ANISOU  605  CE1 PHE A 945     2303   2561   1090   -153    -94    115       C  
ATOM    606  CE2 PHE A 945      46.038 118.578  11.092  1.00 17.25           C  
ANISOU  606  CE2 PHE A 945     3035   2644    873   -444   -275     -1       C  
ATOM    607  CZ  PHE A 945      45.537 119.812  11.459  1.00 17.54           C  
ANISOU  607  CZ  PHE A 945     3068   2653    944   -342     -6     82       C  
ATOM    608  N   TRP A 946      46.400 117.775  17.027  1.00 14.87           N  
ANISOU  608  N   TRP A 946     2609   2231    807     69    232   -425       N  
ATOM    609  CA  TRP A 946      45.609 118.658  17.871  1.00 14.51           C  
ANISOU  609  CA  TRP A 946     2620   2142    750    -47    245   -285       C  
ATOM    610  C   TRP A 946      46.066 120.092  17.645  1.00 13.79           C  
ANISOU  610  C   TRP A 946     2643   1861    737    201    239   -163       C  
ATOM    611  O   TRP A 946      47.254 120.348  17.424  1.00 13.86           O  
ANISOU  611  O   TRP A 946     2480   2039    747    117    348   -219       O  
ATOM    612  CB  TRP A 946      45.782 118.303  19.348  1.00 15.87           C  
ANISOU  612  CB  TRP A 946     3211   1980    837   -392    102     14       C  
ATOM    613  CG  TRP A 946      45.316 116.927  19.716  1.00 14.49           C  
ANISOU  613  CG  TRP A 946     2487   2244    774   -337   -261    231       C  
ATOM    614  CD1 TRP A 946      45.891 115.742  19.358  1.00 17.27           C  
ANISOU  614  CD1 TRP A 946     2908   2377   1278   -564   -561    -22       C  
ATOM    615  CD2 TRP A 946      44.191 116.594  20.539  1.00 15.46           C  
ANISOU  615  CD2 TRP A 946     2726   2345    804   -355    319     77       C  
ATOM    616  NE1 TRP A 946      45.187 114.692  19.897  1.00 18.61           N  
ANISOU  616  NE1 TRP A 946     3246   2407   1419   -264   -222     17       N  
ATOM    617  CE2 TRP A 946      44.139 115.188  20.627  1.00 16.95           C  
ANISOU  617  CE2 TRP A 946     3232   2331    877   -178    205    176       C  
ATOM    618  CE3 TRP A 946      43.219 117.348  21.204  1.00 17.49           C  
ANISOU  618  CE3 TRP A 946     3332   2444    869   -145    245    -12       C  
ATOM    619  CZ2 TRP A 946      43.154 114.522  21.353  1.00 17.77           C  
ANISOU  619  CZ2 TRP A 946     3448   2328    977   -291    -17    273       C  
ATOM    620  CZ3 TRP A 946      42.242 116.684  21.925  1.00 18.49           C  
ANISOU  620  CZ3 TRP A 946     3657   2329   1041   -916    -69    106       C  
ATOM    621  CH2 TRP A 946      42.217 115.285  21.994  1.00 18.44           C  
ANISOU  621  CH2 TRP A 946     3675   2258   1075  -1022    -87    152       C  
ATOM    622  N   ILE A 947      45.123 121.027  17.700  1.00 12.01           N  
ANISOU  622  N   ILE A 947     2420   1447    698    -97    235   -216       N  
ATOM    623  CA  ILE A 947      45.418 122.435  17.463  1.00 12.94           C  
ANISOU  623  CA  ILE A 947     2777   1366    775    236    -30   -214       C  
ATOM    624  C   ILE A 947      44.593 123.286  18.420  1.00 14.43           C  
ANISOU  624  C   ILE A 947     2754   1869    860     99   -425   -269       C  
ATOM    625  O   ILE A 947      43.460 122.934  18.765  1.00 14.30           O  
ANISOU  625  O   ILE A 947     2224   2122   1089     29    -30   -402       O  
ATOM    626  CB  ILE A 947      45.182 122.828  15.987  1.00 12.88           C  
ANISOU  626  CB  ILE A 947     2219   1870    806    -89   -214   -125       C  
ATOM    627  CG1 ILE A 947      45.760 124.215  15.693  1.00 14.39           C  
ANISOU  627  CG1 ILE A 947     3036   1643    790     62    227    -29       C  
ATOM    628  CG2 ILE A 947      43.699 122.773  15.636  1.00 12.04           C  
ANISOU  628  CG2 ILE A 947     1794   1990    792    497    112    -71       C  
ATOM    629  CD1 ILE A 947      45.666 124.619  14.235  1.00 13.70           C  
ANISOU  629  CD1 ILE A 947     2822   1612    773    173    250    162       C  
ATOM    630  N   ARG A 948      45.177 124.396  18.868  1.00 13.52           N  
ANISOU  630  N   ARG A 948     2423   2029    686    254   -260    -78       N  
ATOM    631  CA  ARG A 948      44.479 125.383  19.686  1.00 13.16           C  
ANISOU  631  CA  ARG A 948     2435   1851    715    462   -102   -210       C  
ATOM    632  C   ARG A 948      44.670 126.740  19.023  1.00 14.40           C  
ANISOU  632  C   ARG A 948     2686   2056    728   -152   -278     -5       C  
ATOM    633  O   ARG A 948      45.785 127.271  18.995  1.00 15.44           O  
ANISOU  633  O   ARG A 948     2708   2070   1086     31   -400    176       O  
ATOM    634  CB  ARG A 948      45.003 125.390  21.123  1.00 15.29           C  
ANISOU  634  CB  ARG A 948     2374   2681    756    370    152    -98       C  
ATOM    635  CG  ARG A 948      44.118 126.165  22.085  1.00 15.37           C  
ANISOU  635  CG  ARG A 948     2378   2707    755    411    -41   -115       C  
ATOM    636  CD  ARG A 948      44.310 125.714  23.527  1.00 18.68           C  
ANISOU  636  CD  ARG A 948     3164   3075    858    104    -45   -317       C  
ATOM    637  NE  ARG A 948      45.491 126.303  24.152  1.00 16.84           N  
ANISOU  637  NE  ARG A 948     2782   2835    783     13   -157   -315       N  
ATOM    638  CZ  ARG A 948      45.489 127.463  24.802  1.00 15.57           C  
ANISOU  638  CZ  ARG A 948     2034   2966    916   -273    432   -140       C  
ATOM    639  NH1 ARG A 948      46.608 127.924  25.345  1.00 15.23           N  
ANISOU  639  NH1 ARG A 948     2088   2902    795   -439   -141    -65       N  
ATOM    640  NH2 ARG A 948      44.369 128.165  24.905  1.00 17.88           N  
ANISOU  640  NH2 ARG A 948     2609   3145   1039   -151    615   -221       N  
ATOM    641  N   ILE A 949      43.589 127.293  18.490  1.00 13.48           N  
ANISOU  641  N   ILE A 949     2472   1917    731    146   -352    143       N  
ATOM    642  CA  ILE A 949      43.630 128.500  17.670  1.00 13.08           C  
ANISOU  642  CA  ILE A 949     2423   1704    843    226   -528    110       C  
ATOM    643  C   ILE A 949      43.113 129.662  18.510  1.00 12.68           C  
ANISOU  643  C   ILE A 949     2477   1526    815   -521   -445    110       C  
ATOM    644  O   ILE A 949      41.931 129.656  18.887  1.00 12.76           O  
ANISOU  644  O   ILE A 949     2377   1489    982     22    306     13       O  
ATOM    645  CB  ILE A 949      42.787 128.330  16.398  1.00 15.01           C  
ANISOU  645  CB  ILE A 949     2951   1882    869    266   -418     91       C  
ATOM    646  CG1 ILE A 949      43.198 127.058  15.655  1.00 14.39           C  
ANISOU  646  CG1 ILE A 949     2740   1990    736    139   -254     69       C  
ATOM    647  CG2 ILE A 949      42.923 129.550  15.500  1.00 14.71           C  
ANISOU  647  CG2 ILE A 949     2987   1771    829    398    119    220       C  
ATOM    648  CD1 ILE A 949      42.274 126.692  14.515  1.00 17.01           C  
ANISOU  648  CD1 ILE A 949     3236   2270    957    219   -512    -51       C  
ATOM    649  N   PRO A 950      43.934 130.668  18.810  1.00 12.94           N  
ANISOU  649  N   PRO A 950     2382   1760    775     38    447    106       N  
ATOM    650  CA  PRO A 950      43.442 131.810  19.586  1.00 13.14           C  
ANISOU  650  CA  PRO A 950     2326   1836    830   -234    119    137       C  
ATOM    651  C   PRO A 950      42.338 132.541  18.840  1.00 14.31           C  
ANISOU  651  C   PRO A 950     2799   1763    874    185    331     11       C  
ATOM    652  O   PRO A 950      42.251 132.495  17.611  1.00 12.34           O  
ANISOU  652  O   PRO A 950     2318   1659    712    303    160     92       O  
ATOM    653  CB  PRO A 950      44.686 132.694  19.742  1.00 17.01           C  
ANISOU  653  CB  PRO A 950     3396   2078    988    108    497   -111       C  
ATOM    654  CG  PRO A 950      45.574 132.302  18.607  1.00 16.20           C  
ANISOU  654  CG  PRO A 950     2729   2062   1363    496    198     18       C  
ATOM    655  CD  PRO A 950      45.339 130.834  18.409  1.00 13.88           C  
ANISOU  655  CD  PRO A 950     2817   1424   1032    -72    178   -100       C  
ATOM    656  N   LYS A 951      41.480 133.212  19.606  1.00 13.61           N  
ANISOU  656  N   LYS A 951     2324   1922    924    360    163    166       N  
ATOM    657  CA  LYS A 951      40.377 133.951  19.011  1.00 12.53           C  
ANISOU  657  CA  LYS A 951     1747   1852   1161    621    401      3       C  
ATOM    658  C   LYS A 951      40.909 135.018  18.064  1.00 13.32           C  
ANISOU  658  C   LYS A 951     2318   1832    910   -199    291    -60       C  
ATOM    659  O   LYS A 951      41.928 135.661  18.332  1.00 14.41           O  
ANISOU  659  O   LYS A 951     2180   1913   1383   -209    447    110       O  
ATOM    660  CB  LYS A 951      39.532 134.604  20.107  1.00 13.46           C  
ANISOU  660  CB  LYS A 951     1765   1964   1384    541    286    133       C  
ATOM    661  CG  LYS A 951      38.282 135.304  19.590  1.00 15.72           C  
ANISOU  661  CG  LYS A 951     2334   2240   1400   1101    464   -130       C  
ATOM    662  CD  LYS A 951      37.239 135.485  20.684  1.00 14.63           C  
ANISOU  662  CD  LYS A 951     2155   2283   1120   1139     60   -234       C  
ATOM    663  CE  LYS A 951      37.711 136.445  21.761  1.00 13.89           C  
ANISOU  663  CE  LYS A 951     1958   2234   1085    302    234   -319       C  
ATOM    664  NZ  LYS A 951      36.680 136.627  22.822  1.00 15.84           N  
ANISOU  664  NZ  LYS A 951     2758   2126   1135    276    103   -444       N  
ATOM    665  N   TYR A 952      40.232 135.184  16.934  1.00 13.67           N  
ANISOU  665  N   TYR A 952     2636   1703    855    592    270     91       N  
ATOM    666  CA  TYR A 952      40.547 136.276  16.028  1.00 12.22           C  
ANISOU  666  CA  TYR A 952     2120   1858    666    351      0    145       C  
ATOM    667  C   TYR A 952      39.996 137.570  16.612  1.00 14.63           C  
ANISOU  667  C   TYR A 952     2493   1946   1121    754     81   -141       C  
ATOM    668  O   TYR A 952      38.817 137.645  16.973  1.00 14.15           O  
ANISOU  668  O   TYR A 952     2214   1901   1262    247     48   -279       O  
ATOM    669  CB  TYR A 952      39.954 135.999  14.647  1.00 15.04           C  
ANISOU  669  CB  TYR A 952     2870   2014    830    637    186    -25       C  
ATOM    670  CG  TYR A 952      40.586 134.807  13.958  1.00 14.76           C  
ANISOU  670  CG  TYR A 952     2709   2101    797    267    -64   -176       C  
ATOM    671  CD1 TYR A 952      41.766 134.944  13.239  1.00 15.23           C  
ANISOU  671  CD1 TYR A 952     2704   2149    932   -137     47   -275       C  
ATOM    672  CD2 TYR A 952      40.011 133.545  14.039  1.00 15.08           C  
ANISOU  672  CD2 TYR A 952     3005   1877    847    -26    264   -253       C  
ATOM    673  CE1 TYR A 952      42.352 133.861  12.611  1.00 14.87           C  
ANISOU  673  CE1 TYR A 952     2844   1926    878   -283    131   -407       C  
ATOM    674  CE2 TYR A 952      40.592 132.453  13.414  1.00 13.55           C  
ANISOU  674  CE2 TYR A 952     2360   1813    975     14     18   -108       C  
ATOM    675  CZ  TYR A 952      41.763 132.619  12.702  1.00 14.80           C  
ANISOU  675  CZ  TYR A 952     2796   1859    967    -25    193   -532       C  
ATOM    676  OH  TYR A 952      42.350 131.542  12.077  1.00 16.57           O  
ANISOU  676  OH  TYR A 952     3225   2047   1025    157    -95   -272       O  
ATOM    677  N   PHE A 953      40.859 138.583  16.729  1.00 17.51           N  
ANISOU  677  N   PHE A 953     3236   2046   1370    524    -26    131       N  
ATOM    678  CA  PHE A 953      40.505 139.822  17.408  1.00 19.27           C  
ANISOU  678  CA  PHE A 953     3366   2295   1661    523   -227    271       C  
ATOM    679  C   PHE A 953      40.321 141.013  16.481  1.00 19.20           C  
ANISOU  679  C   PHE A 953     2965   2480   1850    285   -277    392       C  
ATOM    680  O   PHE A 953      39.606 141.951  16.849  1.00 20.92           O  
ANISOU  680  O   PHE A 953     3507   2677   1764    129   -519    157       O  
ATOM    681  CB  PHE A 953      41.575 140.195  18.448  1.00 21.29           C  
ANISOU  681  CB  PHE A 953     3772   2533   1786    309  -1095    380       C  
ATOM    682  CG  PHE A 953      41.756 139.176  19.537  1.00 24.50           C  
ANISOU  682  CG  PHE A 953     4215   2857   2239    125  -1424    384       C  
ATOM    683  CD1 PHE A 953      40.818 139.047  20.549  1.00 27.26           C  
ANISOU  683  CD1 PHE A 953     4637   3043   2678    -23  -1347    654       C  
ATOM    684  CD2 PHE A 953      42.879 138.366  19.565  1.00 26.64           C  
ANISOU  684  CD2 PHE A 953     4714   3006   2402     56  -1422    444       C  
ATOM    685  CE1 PHE A 953      40.988 138.116  21.557  1.00 26.26           C  
ANISOU  685  CE1 PHE A 953     3967   3155   2855   -151  -1697    560       C  
ATOM    686  CE2 PHE A 953      43.056 137.434  20.573  1.00 28.69           C  
ANISOU  686  CE2 PHE A 953     4942   3182   2779   -368  -1438    491       C  
ATOM    687  CZ  PHE A 953      42.108 137.309  21.569  1.00 29.24           C  
ANISOU  687  CZ  PHE A 953     5193   3088   2827   -644  -1578    774       C  
ATOM    688  N   ASN A 954      40.942 141.009  15.305  1.00 20.73           N  
ANISOU  688  N   ASN A 954     3495   2577   1805   -331    -14    545       N  
ATOM    689  CA  ASN A 954      41.009 142.187  14.457  1.00 24.07           C  
ANISOU  689  CA  ASN A 954     4347   2705   2092   -575   -407    587       C  
ATOM    690  C   ASN A 954      40.449 141.883  13.072  1.00 21.24           C  
ANISOU  690  C   ASN A 954     3676   2511   1883   -633   -204    733       C  
ATOM    691  O   ASN A 954      40.436 140.735  12.620  1.00 21.87           O  
ANISOU  691  O   ASN A 954     3882   2548   1881   -165   -559    620       O  
ATOM    692  CB  ASN A 954      42.457 142.685  14.334  1.00 25.75           C  
ANISOU  692  CB  ASN A 954     4185   2926   2673  -1027   -204    227       C  
ATOM    693  CG  ASN A 954      42.549 144.069  13.727  1.00 31.14           C  
ANISOU  693  CG  ASN A 954     5566   3416   2849   -766     68   -351       C  
ATOM    694  OD1 ASN A 954      42.626 144.221  12.508  1.00 33.84           O  
ANISOU  694  OD1 ASN A 954     6063   3891   2905   -552    110   -390       O  
ATOM    695  ND2 ASN A 954      42.543 145.089  14.578  1.00 32.83           N  
ANISOU  695  ND2 ASN A 954     6283   3364   2826  -1097    215   -905       N  
ATOM    696  N   SER A 955      39.990 142.942  12.398  1.00 19.57           N  
ANISOU  696  N   SER A 955     3487   2570   1377   -173    -22    807       N  
ATOM    697  CA  SER A 955      39.452 142.802  11.049  1.00 18.81           C  
ANISOU  697  CA  SER A 955     2997   2648   1503    281     74    829       C  
ATOM    698  C   SER A 955      40.518 142.409  10.035  1.00 19.07           C  
ANISOU  698  C   SER A 955     3138   2627   1481    661   -194    664       C  
ATOM    699  O   SER A 955      40.173 141.978   8.929  1.00 18.86           O  
ANISOU  699  O   SER A 955     3512   2396   1258    444    299    126       O  
ATOM    700  CB  SER A 955      38.769 144.099  10.612  1.00 21.65           C  
ANISOU  700  CB  SER A 955     3968   2511   1748     50    -36    723       C  
ATOM    701  OG  SER A 955      39.700 145.164  10.526  1.00 20.94           O  
ANISOU  701  OG  SER A 955     3715   2407   1834    450   -165    690       O  
ATOM    702  N   ILE A 956      41.800 142.546  10.385  1.00 18.38           N  
ANISOU  702  N   ILE A 956     2759   2375   1849    660     -4    452       N  
ATOM    703  CA  ILE A 956      42.875 142.145   9.486  1.00 17.86           C  
ANISOU  703  CA  ILE A 956     2055   2529   2204    281    503    443       C  
ATOM    704  C   ILE A 956      42.863 140.643   9.236  1.00 21.13           C  
ANISOU  704  C   ILE A 956     3330   2525   2173    429    296    693       C  
ATOM    705  O   ILE A 956      43.455 140.172   8.258  1.00 22.10           O  
ANISOU  705  O   ILE A 956     3775   2508   2115    848    674    653       O  
ATOM    706  CB  ILE A 956      44.235 142.638  10.029  1.00 23.80           C  
ANISOU  706  CB  ILE A 956     3459   2905   2678    405    613    482       C  
ATOM    707  CG1 ILE A 956      45.291 142.653   8.922  1.00 27.42           C  
ANISOU  707  CG1 ILE A 956     3806   3423   3190     83    878    583       C  
ATOM    708  CG2 ILE A 956      44.691 141.772  11.195  1.00 26.51           C  
ANISOU  708  CG2 ILE A 956     4063   3066   2943    161    224    363       C  
ATOM    709  CD1 ILE A 956      46.614 143.248   9.354  1.00 30.94           C  
ANISOU  709  CD1 ILE A 956     4666   3624   3467    -55    896    664       C  
ATOM    710  N   SER A 957      42.189 139.875  10.094  1.00 18.98           N  
ANISOU  710  N   SER A 957     2871   2469   1873    662   -112    824       N  
ATOM    711  CA  SER A 957      42.092 138.432   9.927  1.00 17.94           C  
ANISOU  711  CA  SER A 957     2702   2583   1533    544   -706    594       C  
ATOM    712  C   SER A 957      40.967 138.012   8.989  1.00 17.58           C  
ANISOU  712  C   SER A 957     2603   2707   1368    937   -379    496       C  
ATOM    713  O   SER A 957      40.905 136.837   8.613  1.00 20.61           O  
ANISOU  713  O   SER A 957     3695   2761   1374    762   -101    274       O  
ATOM    714  CB  SER A 957      41.906 137.757  11.287  1.00 17.22           C  
ANISOU  714  CB  SER A 957     2599   2518   1427    100   -636    503       C  
ATOM    715  OG  SER A 957      43.052 137.926  12.102  1.00 18.47           O  
ANISOU  715  OG  SER A 957     2994   2281   1742    378   -450    367       O  
ATOM    716  N   LEU A 958      40.080 138.929   8.611  1.00 18.13           N  
ANISOU  716  N   LEU A 958     2886   2713   1289    735   -322    456       N  
ATOM    717  CA  LEU A 958      39.013 138.594   7.680  1.00 18.22           C  
ANISOU  717  CA  LEU A 958     3207   2474   1243    566   -326    278       C  
ATOM    718  C   LEU A 958      39.573 138.436   6.273  1.00 19.70           C  
ANISOU  718  C   LEU A 958     3756   2284   1446    217    207    148       C  
ATOM    719  O   LEU A 958      40.414 139.224   5.830  1.00 21.69           O  
ANISOU  719  O   LEU A 958     4212   2391   1638   -477     17    194       O  
ATOM    720  CB  LEU A 958      37.948 139.691   7.682  1.00 19.13           C  
ANISOU  720  CB  LEU A 958     3309   2487   1475    918    -32    378       C  
ATOM    721  CG  LEU A 958      37.166 139.925   8.976  1.00 20.19           C  
ANISOU  721  CG  LEU A 958     3618   2481   1571    814    171    561       C  
ATOM    722  CD1 LEU A 958      36.248 141.130   8.828  1.00 20.80           C  
ANISOU  722  CD1 LEU A 958     3461   2614   1829    389    -49    564       C  
ATOM    723  CD2 LEU A 958      36.368 138.688   9.354  1.00 21.28           C  
ANISOU  723  CD2 LEU A 958     3558   2750   1779    447    157    540       C  
ATOM    724  N   ASN A 959      39.096 137.407   5.569  1.00 19.67           N  
ANISOU  724  N   ASN A 959     3766   2179   1529    936    331      3       N  
ATOM    725  CA  ASN A 959      39.491 137.139   4.184  1.00 19.55           C  
ANISOU  725  CA  ASN A 959     3336   2439   1652    620    400    354       C  
ATOM    726  C   ASN A 959      41.008 137.008   4.046  1.00 19.09           C  
ANISOU  726  C   ASN A 959     3281   2387   1587    535   -132    319       C  
ATOM    727  O   ASN A 959      41.639 137.651   3.203  1.00 22.33           O  
ANISOU  727  O   ASN A 959     3973   2774   1738    377     10     93       O  
ATOM    728  CB  ASN A 959      38.925 138.184   3.218  1.00 21.92           C  
ANISOU  728  CB  ASN A 959     3453   2809   2065    857    -22    454       C  
ATOM    729  CG  ASN A 959      37.417 138.303   3.306  1.00 29.27           C  
ANISOU  729  CG  ASN A 959     5363   3268   2489    879   -232    181       C  
ATOM    730  OD1 ASN A 959      36.876 139.401   3.442  1.00 33.53           O  
ANISOU  730  OD1 ASN A 959     6544   3499   2696    687   -402     90       O  
ATOM    731  ND2 ASN A 959      36.728 137.171   3.230  1.00 29.67           N  
ANISOU  731  ND2 ASN A 959     5118   3596   2558    749   -682    175       N  
ATOM    732  N   ASN A 960      41.600 136.157   4.893  1.00 18.33           N  
ANISOU  732  N   ASN A 960     3141   2308   1517    652   -361     95       N  
ATOM    733  CA  ASN A 960      43.053 135.980   4.902  1.00 17.64           C  
ANISOU  733  CA  ASN A 960     2921   2363   1418    357   -302    -15       C  
ATOM    734  C   ASN A 960      43.356 134.523   5.269  1.00 15.69           C  
ANISOU  734  C   ASN A 960     2724   2175   1062    470   -295   -391       C  
ATOM    735  O   ASN A 960      43.672 134.184   6.412  1.00 18.20           O  
ANISOU  735  O   ASN A 960     3474   2363   1080    -10   -172   -171       O  
ATOM    736  CB  ASN A 960      43.745 136.965   5.845  1.00 18.20           C  
ANISOU  736  CB  ASN A 960     2797   2471   1646    201   -514     61       C  
ATOM    737  CG  ASN A 960      45.242 136.735   5.937  1.00 21.14           C  
ANISOU  737  CG  ASN A 960     3258   2758   2017    240   -355    152       C  
ATOM    738  OD1 ASN A 960      45.815 136.742   7.026  1.00 20.95           O  
ANISOU  738  OD1 ASN A 960     2752   2773   2436     42   -282    -75       O  
ATOM    739  ND2 ASN A 960      45.881 136.522   4.792  1.00 21.83           N  
ANISOU  739  ND2 ASN A 960     3216   2804   2276    309   -271   -206       N  
ATOM    740  N   GLU A 961      43.251 133.646   4.274  1.00 17.39           N  
ANISOU  740  N   GLU A 961     2868   2358   1383    508      3    -10       N  
ATOM    741  CA  GLU A 961      43.626 132.252   4.457  1.00 16.40           C  
ANISOU  741  CA  GLU A 961     2702   2335   1197    182    166   -346       C  
ATOM    742  C   GLU A 961      45.145 132.137   4.467  1.00 18.11           C  
ANISOU  742  C   GLU A 961     3051   2587   1243    495     29    139       C  
ATOM    743  O   GLU A 961      45.821 132.652   3.571  1.00 21.75           O  
ANISOU  743  O   GLU A 961     3833   2942   1489    716    176    592       O  
ATOM    744  CB  GLU A 961      43.045 131.391   3.336  1.00 19.00           C  
ANISOU  744  CB  GLU A 961     3594   2289   1337   -194    -83   -337       C  
ATOM    745  CG  GLU A 961      43.471 129.932   3.405  1.00 20.33           C  
ANISOU  745  CG  GLU A 961     3832   2408   1484   -145   -585   -284       C  
ATOM    746  CD  GLU A 961      42.814 129.074   2.341  1.00 23.88           C  
ANISOU  746  CD  GLU A 961     4305   2827   1942    455   -721   -256       C  
ATOM    747  OE1 GLU A 961      41.713 129.437   1.877  1.00 30.45           O  
ANISOU  747  OE1 GLU A 961     5574   3437   2560    871   -811   -843       O  
ATOM    748  OE2 GLU A 961      43.401 128.037   1.969  1.00 21.45           O  
ANISOU  748  OE2 GLU A 961     3909   2527   1713     28   -542    -44       O  
ATOM    749  N   TYR A 962      45.679 131.464   5.484  1.00 16.28           N  
ANISOU  749  N   TYR A 962     2722   2461   1004     81   -457    131       N  
ATOM    750  CA  TYR A 962      47.118 131.317   5.649  1.00 15.76           C  
ANISOU  750  CA  TYR A 962     2830   2240    919   -406   -489    -87       C  
ATOM    751  C   TYR A 962      47.461 129.865   5.947  1.00 13.53           C  
ANISOU  751  C   TYR A 962     2306   1878    957    257     12    -47       C  
ATOM    752  O   TYR A 962      46.799 129.212   6.759  1.00 17.44           O  
ANISOU  752  O   TYR A 962     3463   1758   1403    -10    615    132       O  
ATOM    753  CB  TYR A 962      47.655 132.236   6.761  1.00 16.02           C  
ANISOU  753  CB  TYR A 962     2940   2222    925   -376   -198    112       C  
ATOM    754  CG  TYR A 962      47.010 132.041   8.118  1.00 15.35           C  
ANISOU  754  CG  TYR A 962     3173   1784    874    -75   -305     71       C  
ATOM    755  CD1 TYR A 962      47.637 131.290   9.104  1.00 14.51           C  
ANISOU  755  CD1 TYR A 962     3248   1441    824    -49    132    -46       C  
ATOM    756  CD2 TYR A 962      45.781 132.617   8.416  1.00 14.63           C  
ANISOU  756  CD2 TYR A 962     2502   2103    952   -354     72     79       C  
ATOM    757  CE1 TYR A 962      47.055 131.113  10.346  1.00 15.16           C  
ANISOU  757  CE1 TYR A 962     3025   1828    906   -124    483   -150       C  
ATOM    758  CE2 TYR A 962      45.191 132.445   9.655  1.00 15.30           C  
ANISOU  758  CE2 TYR A 962     2430   2155   1228    -91    182     53       C  
ATOM    759  CZ  TYR A 962      45.833 131.692  10.616  1.00 15.89           C  
ANISOU  759  CZ  TYR A 962     2942   2080   1016    -38    568     27       C  
ATOM    760  OH  TYR A 962      45.250 131.517  11.851  1.00 16.80           O  
ANISOU  760  OH  TYR A 962     3136   2190   1056   -246     34   -299       O  
ATOM    761  N   THR A 963      48.497 129.366   5.278  1.00 14.62           N  
ANISOU  761  N   THR A 963     2940   1664    952    696    304     43       N  
ATOM    762  CA  THR A 963      48.938 127.993   5.473  1.00 13.84           C  
ANISOU  762  CA  THR A 963     2559   1789    910    807    260   -142       C  
ATOM    763  C   THR A 963      49.646 127.851   6.818  1.00 12.23           C  
ANISOU  763  C   THR A 963     1951   2006    691    224   -399   -129       C  
ATOM    764  O   THR A 963      50.336 128.764   7.280  1.00 16.62           O  
ANISOU  764  O   THR A 963     2993   2256   1066   -276    -50    -64       O  
ATOM    765  CB  THR A 963      49.893 127.595   4.345  1.00 13.76           C  
ANISOU  765  CB  THR A 963     2627   1833    767    277    287    -19       C  
ATOM    766  OG1 THR A 963      49.287 127.888   3.080  1.00 21.44           O  
ANISOU  766  OG1 THR A 963     4391   2603   1152    543    140    127       O  
ATOM    767  CG2 THR A 963      50.220 126.109   4.406  1.00 14.07           C  
ANISOU  767  CG2 THR A 963     2467   1431   1449     42    521   -205       C  
ATOM    768  N   ILE A 964      49.462 126.692   7.452  1.00 15.71           N  
ANISOU  768  N   ILE A 964     3101   2046    821    149    273      4       N  
ATOM    769  CA  ILE A 964      50.137 126.397   8.713  1.00 15.07           C  
ANISOU  769  CA  ILE A 964     2906   2051    769     47    247     98       C  
ATOM    770  C   ILE A 964      50.967 125.123   8.595  1.00 12.65           C  
ANISOU  770  C   ILE A 964     2252   1921    635    -47     24   -306       C  
ATOM    771  O   ILE A 964      52.029 125.005   9.215  1.00 15.30           O  
ANISOU  771  O   ILE A 964     2758   2191    865    511   -395      5       O  
ATOM    772  CB  ILE A 964      49.156 126.335   9.900  1.00 15.30           C  
ANISOU  772  CB  ILE A 964     2955   2036    824     23    386    -10       C  
ATOM    773  CG1 ILE A 964      48.041 125.322   9.634  1.00 14.33           C  
ANISOU  773  CG1 ILE A 964     2621   2002    824   -481    267    202       C  
ATOM    774  CG2 ILE A 964      48.581 127.716  10.189  1.00 16.65           C  
ANISOU  774  CG2 ILE A 964     3359   2111    857    251     35    -74       C  
ATOM    775  CD1 ILE A 964      47.207 125.002  10.858  1.00 15.08           C  
ANISOU  775  CD1 ILE A 964     2955   1907    869   -253     -9     46       C  
ATOM    776  N   ILE A 965      50.490 124.161   7.807  1.00 15.79           N  
ANISOU  776  N   ILE A 965     3054   2108    838     -7    -88   -173       N  
ATOM    777  CA  ILE A 965      51.196 122.905   7.562  1.00 14.66           C  
ANISOU  777  CA  ILE A 965     2649   2200    721    -77     83   -280       C  
ATOM    778  C   ILE A 965      51.236 122.710   6.053  1.00 15.44           C  
ANISOU  778  C   ILE A 965     2823   2285    760    169    246    106       C  
ATOM    779  O   ILE A 965      50.192 122.497   5.425  1.00 16.54           O  
ANISOU  779  O   ILE A 965     2958   2542    785      1     64   -278       O  
ATOM    780  CB  ILE A 965      50.519 121.710   8.248  1.00 15.96           C  
ANISOU  780  CB  ILE A 965     3093   2141    829     50    271   -139       C  
ATOM    781  CG1 ILE A 965      50.260 122.011   9.726  1.00 14.75           C  
ANISOU  781  CG1 ILE A 965     2557   2357    689      8    271     46       C  
ATOM    782  CG2 ILE A 965      51.379 120.462   8.111  1.00 18.82           C  
ANISOU  782  CG2 ILE A 965     3843   2261   1048     89    238   -275       C  
ATOM    783  CD1 ILE A 965      49.558 120.890  10.464  1.00 15.38           C  
ANISOU  783  CD1 ILE A 965     2470   2634    741   -334    153     44       C  
ATOM    784  N   ASN A 966      52.432 122.772   5.471  1.00 14.09           N  
ANISOU  784  N   ASN A 966     2443   2174    738    217    228     40       N  
ATOM    785  CA  ASN A 966      52.598 122.842   4.025  1.00 13.64           C  
ANISOU  785  CA  ASN A 966     2524   1874    786    440    185   -250       C  
ATOM    786  C   ASN A 966      53.372 121.628   3.532  1.00 14.86           C  
ANISOU  786  C   ASN A 966     2472   2393    780    -75   -282   -422       C  
ATOM    787  O   ASN A 966      54.505 121.390   3.963  1.00 17.06           O  
ANISOU  787  O   ASN A 966     2892   2684    907    396   -249   -263       O  
ATOM    788  CB  ASN A 966      53.328 124.129   3.635  1.00 17.19           C  
ANISOU  788  CB  ASN A 966     3279   2370    883     -9    340     80       C  
ATOM    789  CG  ASN A 966      53.224 124.434   2.155  1.00 21.72           C  
ANISOU  789  CG  ASN A 966     4336   2766   1153   -164    372    123       C  
ATOM    790  OD1 ASN A 966      52.480 123.780   1.425  1.00 27.47           O  
ANISOU  790  OD1 ASN A 966     6031   2895   1510     43    -70    -24       O  
ATOM    791  ND2 ASN A 966      53.968 125.437   1.706  1.00 27.51           N  
ANISOU  791  ND2 ASN A 966     5674   3224   1554   -646    352    264       N  
ATOM    792  N   CYS A 967      52.761 120.869   2.627  1.00 13.58           N  
ANISOU  792  N   CYS A 967     2251   2249    657     42    265   -259       N  
ATOM    793  CA  CYS A 967      53.426 119.788   1.909  1.00 15.27           C  
ANISOU  793  CA  CYS A 967     2789   2276    739    -42     23   -251       C  
ATOM    794  C   CYS A 967      53.166 119.915   0.415  1.00 15.45           C  
ANISOU  794  C   CYS A 967     2723   2310    838   -472     69   -335       C  
ATOM    795  O   CYS A 967      52.911 118.928  -0.283  1.00 16.65           O  
ANISOU  795  O   CYS A 967     2971   2590    765   -112     35   -159       O  
ATOM    796  CB  CYS A 967      53.006 118.418   2.438  1.00 17.23           C  
ANISOU  796  CB  CYS A 967     3402   2133   1011    342    239   -340       C  
ATOM    797  SG  CYS A 967      54.114 117.057   1.980  1.00 16.07           S  
ANISOU  797  SG  CYS A 967     2807   2172   1126   -139     79    -75       S  
ATOM    798  N   MET A 968      53.217 121.143  -0.089  1.00 14.59           N  
ANISOU  798  N   MET A 968     2752   2059    733   -145    239     55       N  
ATOM    799  CA  MET A 968      52.995 121.434  -1.497  1.00 15.57           C  
ANISOU  799  CA  MET A 968     2732   2220    962   -337    287     61       C  
ATOM    800  C   MET A 968      54.326 121.704  -2.183  1.00 16.36           C  
ANISOU  800  C   MET A 968     2462   2620   1135   -822    476   -239       C  
ATOM    801  O   MET A 968      55.202 122.372  -1.625  1.00 19.70           O  
ANISOU  801  O   MET A 968     2978   2885   1622  -1100    -70   -282       O  
ATOM    802  CB  MET A 968      52.097 122.664  -1.653  1.00 17.39           C  
ANISOU  802  CB  MET A 968     2896   2362   1349   -684   -260    109       C  
ATOM    803  CG  MET A 968      50.637 122.437  -1.301  1.00 17.50           C  
ANISOU  803  CG  MET A 968     2657   2761   1230   -696   -418   -150       C  
ATOM    804  SD  MET A 968      49.742 121.562  -2.598  1.00 21.16           S  
ANISOU  804  SD  MET A 968     3694   3189   1158   -195     84    137       S  
ATOM    805  CE  MET A 968      48.063 121.676  -1.986  1.00 20.53           C  
ANISOU  805  CE  MET A 968     3038   3284   1477     39    451    -77       C  
ATOM    806  N   GLU A 969      54.472 121.179  -3.397  1.00 16.49           N  
ANISOU  806  N   GLU A 969     2470   2784   1011   -566    522   -179       N  
ATOM    807  CA  GLU A 969      55.622 121.470  -4.246  1.00 19.51           C  
ANISOU  807  CA  GLU A 969     3107   3149   1156     21    176    343       C  
ATOM    808  C   GLU A 969      55.113 121.648  -5.665  1.00 20.00           C  
ANISOU  808  C   GLU A 969     3450   3165    986    -93    423    266       C  
ATOM    809  O   GLU A 969      54.463 120.748  -6.206  1.00 21.69           O  
ANISOU  809  O   GLU A 969     3686   3430   1124   -654    -57    379       O  
ATOM    810  CB  GLU A 969      56.660 120.346  -4.188  1.00 24.34           C  
ANISOU  810  CB  GLU A 969     3838   3618   1791    450    700    373       C  
ATOM    811  CG  GLU A 969      57.740 120.442  -5.260  1.00 29.84           C  
ANISOU  811  CG  GLU A 969     4870   4172   2297   -329   1119    455       C  
ATOM    812  CD  GLU A 969      58.543 121.730  -5.183  1.00 33.41           C  
ANISOU  812  CD  GLU A 969     5446   4713   2536   -658   1325    312       C  
ATOM    813  OE1 GLU A 969      58.691 122.282  -4.072  1.00 33.78           O  
ANISOU  813  OE1 GLU A 969     5505   4894   2435  -1248    975    108       O  
ATOM    814  OE2 GLU A 969      59.027 122.191  -6.238  1.00 35.85           O  
ANISOU  814  OE2 GLU A 969     5778   4949   2895   -574    749    367       O  
ATOM    815  N   ASN A 970      55.405 122.805  -6.260  1.00 21.00           N  
ANISOU  815  N   ASN A 970     3600   3273   1106   -272    255    301       N  
ATOM    816  CA  ASN A 970      54.876 123.166  -7.577  1.00 19.26           C  
ANISOU  816  CA  ASN A 970     3401   2917   1000   -129   -121    283       C  
ATOM    817  C   ASN A 970      53.349 123.118  -7.587  1.00 19.68           C  
ANISOU  817  C   ASN A 970     3770   2639   1068   -282     18    199       C  
ATOM    818  O   ASN A 970      52.724 122.720  -8.572  1.00 19.53           O  
ANISOU  818  O   ASN A 970     3505   2774   1142   -508   -176     -6       O  
ATOM    819  CB  ASN A 970      55.484 122.314  -8.695  1.00 19.56           C  
ANISOU  819  CB  ASN A 970     3535   2853   1042     20    401    127       C  
ATOM    820  CG  ASN A 970      55.327 122.948 -10.063  1.00 19.35           C  
ANISOU  820  CG  ASN A 970     3275   2993   1083   -148    375    207       C  
ATOM    821  OD1 ASN A 970      55.115 124.155 -10.179  1.00 19.25           O  
ANISOU  821  OD1 ASN A 970     3228   2858   1228   -784     28    292       O  
ATOM    822  ND2 ASN A 970      55.433 122.135 -11.108  1.00 22.18           N  
ANISOU  822  ND2 ASN A 970     3963   3157   1308    489    718   -204       N  
ATOM    823  N   ASN A 971      52.748 123.518  -6.464  1.00 21.42           N  
ANISOU  823  N   ASN A 971     4554   2278   1308   -637    585    -75       N  
ATOM    824  CA  ASN A 971      51.294 123.549  -6.290  1.00 20.14           C  
ANISOU  824  CA  ASN A 971     3872   2387   1393   -519    572    -60       C  
ATOM    825  C   ASN A 971      50.651 122.169  -6.409  1.00 19.40           C  
ANISOU  825  C   ASN A 971     3840   2181   1349   -249   -360    387       C  
ATOM    826  O   ASN A 971      49.482 122.048  -6.779  1.00 22.17           O  
ANISOU  826  O   ASN A 971     3805   2360   2258   -687    249    550       O  
ATOM    827  CB  ASN A 971      50.611 124.580  -7.195  1.00 25.90           C  
ANISOU  827  CB  ASN A 971     5334   2875   1633   -294    887    -92       C  
ATOM    828  CG  ASN A 971      50.712 125.991  -6.647  1.00 33.18           C  
ANISOU  828  CG  ASN A 971     7150   3457   1999    333    764   -286       C  
ATOM    829  OD1 ASN A 971      49.898 126.407  -5.822  1.00 37.07           O  
ANISOU  829  OD1 ASN A 971     7760   3941   2384    696   1246   -231       O  
ATOM    830  ND2 ASN A 971      51.718 126.730  -7.095  1.00 33.65           N  
ANISOU  830  ND2 ASN A 971     7344   3504   1939    425    506   -196       N  
ATOM    831  N   SER A 972      51.401 121.117  -6.092  1.00 18.28           N  
ANISOU  831  N   SER A 972     4002   1939   1005   -132    -28     41       N  
ATOM    832  CA  SER A 972      50.850 119.774  -5.984  1.00 16.75           C  
ANISOU  832  CA  SER A 972     3416   1931   1019    149    176   -385       C  
ATOM    833  C   SER A 972      51.193 119.209  -4.616  1.00 15.31           C  
ANISOU  833  C   SER A 972     2670   2321    826    112    453   -179       C  
ATOM    834  O   SER A 972      52.288 119.442  -4.095  1.00 15.54           O  
ANISOU  834  O   SER A 972     2406   2459   1039   -523    442    -94       O  
ATOM    835  CB  SER A 972      51.385 118.844  -7.078  1.00 18.38           C  
ANISOU  835  CB  SER A 972     3870   1872   1242    147    131   -480       C  
ATOM    836  OG  SER A 972      50.752 117.577  -7.009  1.00 18.08           O  
ANISOU  836  OG  SER A 972     3684   2180   1005    125    -22   -318       O  
ATOM    837  N   GLY A 973      50.252 118.471  -4.036  1.00 15.95           N  
ANISOU  837  N   GLY A 973     2834   2255    970    -22    658      0       N  
ATOM    838  CA  GLY A 973      50.439 117.920  -2.709  1.00 14.51           C  
ANISOU  838  CA  GLY A 973     2453   2249    812    -18    534    -12       C  
ATOM    839  C   GLY A 973      49.267 118.203  -1.794  1.00 13.44           C  
ANISOU  839  C   GLY A 973     2292   2207    609     44    208      2       C  
ATOM    840  O   GLY A 973      48.117 118.236  -2.241  1.00 15.22           O  
ANISOU  840  O   GLY A 973     2804   2241    736   -176    187    -56       O  
ATOM    841  N   TRP A 974      49.544 118.410  -0.508  1.00 13.02           N  
ANISOU  841  N   TRP A 974     2281   2038    628   -160    230     21       N  
ATOM    842  CA  TRP A 974      48.504 118.710   0.463  1.00 13.60           C  
ANISOU  842  CA  TRP A 974     2400   2121    645    -50    248    -29       C  
ATOM    843  C   TRP A 974      48.985 119.807   1.400  1.00 13.74           C  
ANISOU  843  C   TRP A 974     2300   2196    723    -13    432   -120       C  
ATOM    844  O   TRP A 974      50.184 120.065   1.526  1.00 14.29           O  
ANISOU  844  O   TRP A 974     2173   2445    813   -358    430   -116       O  
ATOM    845  CB  TRP A 974      48.088 117.468   1.264  1.00 13.09           C  
ANISOU  845  CB  TRP A 974     2205   2148    621   -121    -11    254       C  
ATOM    846  CG  TRP A 974      49.209 116.792   2.001  1.00 14.32           C  
ANISOU  846  CG  TRP A 974     2185   2562    694   -142    212   -137       C  
ATOM    847  CD1 TRP A 974      49.952 115.732   1.566  1.00 14.14           C  
ANISOU  847  CD1 TRP A 974     2022   2597    754   -156    -82   -124       C  
ATOM    848  CD2 TRP A 974      49.703 117.117   3.308  1.00 15.47           C  
ANISOU  848  CD2 TRP A 974     2317   2775    784   -462     98   -140       C  
ATOM    849  NE1 TRP A 974      50.880 115.382   2.517  1.00 16.76           N  
ANISOU  849  NE1 TRP A 974     2757   2726    886   -278     -9   -356       N  
ATOM    850  CE2 TRP A 974      50.747 116.215   3.596  1.00 15.81           C  
ANISOU  850  CE2 TRP A 974     2624   2579    803   -474    137   -206       C  
ATOM    851  CE3 TRP A 974      49.366 118.085   4.259  1.00 16.07           C  
ANISOU  851  CE3 TRP A 974     2566   2759    780   -361    185    -26       C  
ATOM    852  CZ2 TRP A 974      51.457 116.254   4.795  1.00 15.54           C  
ANISOU  852  CZ2 TRP A 974     2509   2444    952   -555    437   -395       C  
ATOM    853  CZ3 TRP A 974      50.072 118.120   5.449  1.00 16.63           C  
ANISOU  853  CZ3 TRP A 974     2747   2698    875   -452    215   -323       C  
ATOM    854  CH2 TRP A 974      51.105 117.211   5.706  1.00 16.66           C  
ANISOU  854  CH2 TRP A 974     2752   2695    885   -489    206   -332       C  
ATOM    855  N   LYS A 975      48.028 120.455   2.059  1.00 14.83           N  
ANISOU  855  N   LYS A 975     2750   2157    728    -96    209   -126       N  
ATOM    856  CA  LYS A 975      48.352 121.499   3.019  1.00 13.34           C  
ANISOU  856  CA  LYS A 975     2196   2165    708    238    296   -224       C  
ATOM    857  C   LYS A 975      47.168 121.713   3.950  1.00 15.17           C  
ANISOU  857  C   LYS A 975     2423   2561    780    404   -197   -237       C  
ATOM    858  O   LYS A 975      46.012 121.508   3.567  1.00 15.91           O  
ANISOU  858  O   LYS A 975     2396   2852    796    350   -184   -172       O  
ATOM    859  CB  LYS A 975      48.719 122.817   2.325  1.00 17.86           C  
ANISOU  859  CB  LYS A 975     3446   2397    941    347    -94    257       C  
ATOM    860  CG  LYS A 975      47.583 123.445   1.533  1.00 17.83           C  
ANISOU  860  CG  LYS A 975     3193   2350   1231    371   -313    671       C  
ATOM    861  CD  LYS A 975      47.983 124.799   0.966  1.00 18.85           C  
ANISOU  861  CD  LYS A 975     3539   2185   1439    394   -196    734       C  
ATOM    862  CE  LYS A 975      46.848 125.418   0.164  1.00 22.16           C  
ANISOU  862  CE  LYS A 975     4204   2470   1747     78   -151    982       C  
ATOM    863  NZ  LYS A 975      47.215 126.751  -0.389  1.00 22.80           N  
ANISOU  863  NZ  LYS A 975     4129   2608   1925    256    250    975       N  
ATOM    864  N   VAL A 976      47.476 122.118   5.178  1.00 15.13           N  
ANISOU  864  N   VAL A 976     2659   2374    716    284      6   -103       N  
ATOM    865  CA  VAL A 976      46.482 122.569   6.144  1.00 15.38           C  
ANISOU  865  CA  VAL A 976     2673   2274    897    672    355    -61       C  
ATOM    866  C   VAL A 976      46.609 124.080   6.256  1.00 15.15           C  
ANISOU  866  C   VAL A 976     2756   2202    799    287   -129   -322       C  
ATOM    867  O   VAL A 976      47.714 124.603   6.447  1.00 15.93           O  
ANISOU  867  O   VAL A 976     2831   2231    992    -40    111    -53       O  
ATOM    868  CB  VAL A 976      46.680 121.900   7.516  1.00 13.89           C  
ANISOU  868  CB  VAL A 976     2011   2405    862    513    290   -293       C  
ATOM    869  CG1 VAL A 976      45.656 122.423   8.513  1.00 14.03           C  
ANISOU  869  CG1 VAL A 976     1955   2542    835   -152    117   -246       C  
ATOM    870  CG2 VAL A 976      46.584 120.387   7.390  1.00 16.14           C  
ANISOU  870  CG2 VAL A 976     2412   2485   1236    534   -151   -194       C  
ATOM    871  N   SER A 977      45.488 124.781   6.122  1.00 15.09           N  
ANISOU  871  N   SER A 977     3044   1868    823    345    151   -144       N  
ATOM    872  CA ASER A 977      45.470 126.231   6.220  0.65 14.25           C  
ANISOU  872  CA ASER A 977     2737   1927    752    364    191    -83       C  
ATOM    873  CA BSER A 977      45.459 126.232   6.205  0.35 14.20           C  
ANISOU  873  CA BSER A 977     2694   1919    783    352    200   -213       C  
ATOM    874  C   SER A 977      44.363 126.666   7.168  1.00 16.01           C  
ANISOU  874  C   SER A 977     3202   2010    870    468      7   -175       C  
ATOM    875  O   SER A 977      43.461 125.894   7.505  1.00 15.25           O  
ANISOU  875  O   SER A 977     2903   2132    759    173      2   -181       O  
ATOM    876  CB ASER A 977      45.290 126.898   4.847  0.65 13.75           C  
ANISOU  876  CB ASER A 977     2536   1958    731    211   -183    258       C  
ATOM    877  CB BSER A 977      45.220 126.871   4.829  0.35 12.20           C  
ANISOU  877  CB BSER A 977     2147   1864    624    216    166   -205       C  
ATOM    878  OG ASER A 977      44.063 126.520   4.250  0.65 14.87           O  
ANISOU  878  OG ASER A 977     2954   1907    787   -142   -279     13       O  
ATOM    879  OG BSER A 977      46.192 126.440   3.893  0.35 13.52           O  
ANISOU  879  OG BSER A 977     2414   1955    770    109    331   -322       O  
ATOM    880  N   LEU A 978      44.451 127.918   7.604  1.00 14.09           N  
ANISOU  880  N   LEU A 978     2722   1812    821    418     77   -294       N  
ATOM    881  CA  LEU A 978      43.473 128.500   8.505  1.00 13.60           C  
ANISOU  881  CA  LEU A 978     2503   1863    802    734   -160   -231       C  
ATOM    882  C   LEU A 978      42.950 129.799   7.912  1.00 13.35           C  
ANISOU  882  C   LEU A 978     2098   2234    739    690     81   -111       C  
ATOM    883  O   LEU A 978      43.607 130.446   7.092  1.00 15.77           O  
ANISOU  883  O   LEU A 978     2871   2372    748      9    228     -7       O  
ATOM    884  CB  LEU A 978      44.071 128.778   9.893  1.00 13.97           C  
ANISOU  884  CB  LEU A 978     2534   2055    719    505     11    -76       C  
ATOM    885  CG  LEU A 978      44.590 127.586  10.699  1.00 16.61           C  
ANISOU  885  CG  LEU A 978     2879   2562    869    223   -459     -4       C  
ATOM    886  CD1 LEU A 978      45.130 128.048  12.044  1.00 14.48           C  
ANISOU  886  CD1 LEU A 978     1926   2794    781   -200   -227   -197       C  
ATOM    887  CD2 LEU A 978      43.502 126.541  10.888  1.00 15.48           C  
ANISOU  887  CD2 LEU A 978     2602   2454    828    335      3      1       C  
ATOM    888  N   ASN A 979      41.744 130.165   8.333  1.00 14.86           N  
ANISOU  888  N   ASN A 979     2426   2242    978    783     20   -441       N  
ATOM    889  CA  ASN A 979      41.153 131.453   8.007  1.00 15.10           C  
ANISOU  889  CA  ASN A 979     2503   2353    880    827     49   -241       C  
ATOM    890  C   ASN A 979      40.275 131.859   9.183  1.00 14.53           C  
ANISOU  890  C   ASN A 979     2543   2189    789    416   -172   -316       C  
ATOM    891  O   ASN A 979      40.190 131.148  10.189  1.00 17.91           O  
ANISOU  891  O   ASN A 979     3665   2153    988    302    338    104       O  
ATOM    892  CB  ASN A 979      40.368 131.389   6.692  1.00 15.71           C  
ANISOU  892  CB  ASN A 979     2753   2294    922    577     97   -218       C  
ATOM    893  CG  ASN A 979      40.233 132.747   6.023  1.00 16.08           C  
ANISOU  893  CG  ASN A 979     2933   2282    896    177   -236   -429       C  
ATOM    894  OD1 ASN A 979      40.403 133.788   6.660  1.00 17.09           O  
ANISOU  894  OD1 ASN A 979     3265   2307    920   -453   -337     22       O  
ATOM    895  ND2 ASN A 979      39.923 132.742   4.731  1.00 19.35           N  
ANISOU  895  ND2 ASN A 979     4214   2041   1099    359   -178   -148       N  
ATOM    896  N   TYR A 980      39.623 133.014   9.057  1.00 16.16           N  
ANISOU  896  N   TYR A 980     3087   1977   1078    235    240    -47       N  
ATOM    897  CA  TYR A 980      38.716 133.483  10.098  1.00 15.12           C  
ANISOU  897  CA  TYR A 980     2572   1965   1208    225    257    208       C  
ATOM    898  C   TYR A 980      37.623 132.452  10.355  1.00 15.21           C  
ANISOU  898  C   TYR A 980     2068   2260   1453    420   -271    507       C  
ATOM    899  O   TYR A 980      36.712 132.284   9.538  1.00 20.46           O  
ANISOU  899  O   TYR A 980     3252   2881   1640    238   -889    601       O  
ATOM    900  CB  TYR A 980      38.108 134.836   9.719  1.00 16.42           C  
ANISOU  900  CB  TYR A 980     3024   1977   1237    597    177   -104       C  
ATOM    901  CG  TYR A 980      37.010 135.300  10.651  1.00 15.08           C  
ANISOU  901  CG  TYR A 980     2962   1946    821    174   -343   -105       C  
ATOM    902  CD1 TYR A 980      37.310 135.866  11.883  1.00 15.89           C  
ANISOU  902  CD1 TYR A 980     3136   1995    905     63   -117   -251       C  
ATOM    903  CD2 TYR A 980      35.673 135.179  10.294  1.00 16.67           C  
ANISOU  903  CD2 TYR A 980     3151   2343    840    362   -151   -104       C  
ATOM    904  CE1 TYR A 980      36.308 136.292  12.737  1.00 15.16           C  
ANISOU  904  CE1 TYR A 980     2659   2343    757    440    -77      4       C  
ATOM    905  CE2 TYR A 980      34.666 135.602  11.139  1.00 17.41           C  
ANISOU  905  CE2 TYR A 980     3160   2497    959    311   -127   -462       C  
ATOM    906  CZ  TYR A 980      34.988 136.158  12.359  1.00 16.54           C  
ANISOU  906  CZ  TYR A 980     2907   2552    823    435   -130   -164       C  
ATOM    907  OH  TYR A 980      33.986 136.580  13.202  1.00 17.82           O  
ANISOU  907  OH  TYR A 980     3054   2879    836    333    -74   -101       O  
ATOM    908  N   GLY A 981      37.722 131.746  11.479  1.00 17.62           N  
ANISOU  908  N   GLY A 981     3481   2139   1076    141    242    383       N  
ATOM    909  CA  GLY A 981      36.741 130.737  11.826  1.00 17.83           C  
ANISOU  909  CA  GLY A 981     3497   2183   1096    438    610     -7       C  
ATOM    910  C   GLY A 981      36.720 129.529  10.917  1.00 15.69           C  
ANISOU  910  C   GLY A 981     2749   2265    947    634    227    115       C  
ATOM    911  O   GLY A 981      35.654 128.943  10.705  1.00 18.34           O  
ANISOU  911  O   GLY A 981     3144   2412   1414    407    422     69       O  
ATOM    912  N   GLU A 982      37.870 129.130  10.376  1.00 15.87           N  
ANISOU  912  N   GLU A 982     2686   2540    803    573     23     89       N  
ATOM    913  CA  GLU A 982      37.927 128.015   9.441  1.00 17.43           C  
ANISOU  913  CA  GLU A 982     3134   2597    890    517    101   -152       C  
ATOM    914  C   GLU A 982      39.212 127.221   9.626  1.00 17.49           C  
ANISOU  914  C   GLU A 982     3333   2327    984    160   -193   -212       C  
ATOM    915  O   GLU A 982      40.269 127.775   9.940  1.00 16.86           O  
ANISOU  915  O   GLU A 982     3344   2009   1053   -104   -343   -366       O  
ATOM    916  CB  GLU A 982      37.848 128.486   7.981  1.00 18.45           C  
ANISOU  916  CB  GLU A 982     3048   3115    846    102   -313     74       C  
ATOM    917  CG  GLU A 982      36.487 129.006   7.558  1.00 22.11           C  
ANISOU  917  CG  GLU A 982     3360   3714   1327    439   -634    330       C  
ATOM    918  CD  GLU A 982      36.408 129.287   6.071  1.00 27.15           C  
ANISOU  918  CD  GLU A 982     4261   4382   1673    836   -421    722       C  
ATOM    919  OE1 GLU A 982      37.461 129.259   5.400  1.00 27.43           O  
ANISOU  919  OE1 GLU A 982     3791   4842   1789    918    174    996       O  
ATOM    920  OE2 GLU A 982      35.290 129.536   5.573  1.00 32.08           O  
ANISOU  920  OE2 GLU A 982     5230   4637   2322    911   -314    599       O  
ATOM    921  N   ILE A 983      39.100 125.910   9.426  1.00 16.66           N  
ANISOU  921  N   ILE A 983     3240   2161    928    521    -81   -207       N  
ATOM    922  CA  ILE A 983      40.238 125.012   9.262  1.00 16.97           C  
ANISOU  922  CA  ILE A 983     3274   2226    947    312   -425   -176       C  
ATOM    923  C   ILE A 983      40.071 124.344   7.905  1.00 16.68           C  
ANISOU  923  C   ILE A 983     3013   2344    981   -102   -586   -197       C  
ATOM    924  O   ILE A 983      39.030 123.731   7.636  1.00 14.04           O  
ANISOU  924  O   ILE A 983     2374   2209    751    -15   -263   -100       O  
ATOM    925  CB  ILE A 983      40.309 123.964  10.384  1.00 16.58           C  
ANISOU  925  CB  ILE A 983     3224   2185    891    437    -40   -240       C  
ATOM    926  CG1 ILE A 983      40.361 124.646  11.753  1.00 17.09           C  
ANISOU  926  CG1 ILE A 983     3434   2182    878    183    131    -68       C  
ATOM    927  CG2 ILE A 983      41.519 123.060  10.193  1.00 16.42           C  
ANISOU  927  CG2 ILE A 983     3106   2229    903    137    -16   -380       C  
ATOM    928  CD1 ILE A 983      40.424 123.677  12.914  1.00 18.45           C  
ANISOU  928  CD1 ILE A 983     3614   2420    976   -345    327    -36       C  
ATOM    929  N   ILE A 984      41.085 124.466   7.049  1.00 17.18           N  
ANISOU  929  N   ILE A 984     3391   2276    861    167    -55    -95       N  
ATOM    930  CA  ILE A 984      40.969 124.107   5.640  1.00 16.51           C  
ANISOU  930  CA  ILE A 984     3255   2072    946    595   -160   -275       C  
ATOM    931  C   ILE A 984      42.009 123.052   5.289  1.00 17.62           C  
ANISOU  931  C   ILE A 984     3392   2271   1034     53   -153   -497       C  
ATOM    932  O   ILE A 984      43.178 123.159   5.676  1.00 16.84           O  
ANISOU  932  O   ILE A 984     2877   2445   1076    256    168   -386       O  
ATOM    933  CB  ILE A 984      41.117 125.347   4.734  1.00 16.39           C  
ANISOU  933  CB  ILE A 984     3035   2018   1174    810    -56   -209       C  
ATOM    934  CG1 ILE A 984      40.100 126.421   5.127  1.00 19.44           C  
ANISOU  934  CG1 ILE A 984     3589   1931   1867    864    -62   -442       C  
ATOM    935  CG2 ILE A 984      40.955 124.970   3.268  1.00 16.71           C  
ANISOU  935  CG2 ILE A 984     3167   2065   1118    812   -100   -217       C  
ATOM    936  CD1 ILE A 984      40.680 127.817   5.191  1.00 20.48           C  
ANISOU  936  CD1 ILE A 984     3118   2309   2357    327   -341   -468       C  
ATOM    937  N   TRP A 985      41.576 122.034   4.549  1.00 15.88           N  
ANISOU  937  N   TRP A 985     2815   2301    918   -172    174   -530       N  
ATOM    938  CA  TRP A 985      42.451 121.017   3.981  1.00 14.39           C  
ANISOU  938  CA  TRP A 985     2438   2283    746    228    189   -324       C  
ATOM    939  C   TRP A 985      42.354 121.104   2.466  1.00 16.77           C  
ANISOU  939  C   TRP A 985     2960   2467    946    597     25   -378       C  
ATOM    940  O   TRP A 985      41.250 121.156   1.916  1.00 16.47           O  
ANISOU  940  O   TRP A 985     2699   2777    782    326     13   -165       O  
ATOM    941  CB  TRP A 985      42.021 119.627   4.453  1.00 15.44           C  
ANISOU  941  CB  TRP A 985     2293   2476   1099    132    399   -505       C  
ATOM    942  CG  TRP A 985      42.695 118.491   3.745  1.00 15.85           C  
ANISOU  942  CG  TRP A 985     2851   2373    798   -403   -214    -24       C  
ATOM    943  CD1 TRP A 985      42.198 117.764   2.701  1.00 15.59           C  
ANISOU  943  CD1 TRP A 985     2555   2352   1015    429    384    192       C  
ATOM    944  CD2 TRP A 985      43.983 117.939   4.041  1.00 17.25           C  
ANISOU  944  CD2 TRP A 985     3074   2642    837     -3    -25     50       C  
ATOM    945  NE1 TRP A 985      43.101 116.798   2.325  1.00 17.59           N  
ANISOU  945  NE1 TRP A 985     3105   2598    982   -377    -26   -139       N  
ATOM    946  CE2 TRP A 985      44.204 116.885   3.133  1.00 16.54           C  
ANISOU  946  CE2 TRP A 985     2571   2701   1013   -322   -285     42       C  
ATOM    947  CE3 TRP A 985      44.971 118.236   4.983  1.00 16.14           C  
ANISOU  947  CE3 TRP A 985     2409   2765    958    -16   -548   -141       C  
ATOM    948  CZ2 TRP A 985      45.373 116.127   3.141  1.00 16.61           C  
ANISOU  948  CZ2 TRP A 985     2378   2776   1159   -307   -151     42       C  
ATOM    949  CZ3 TRP A 985      46.128 117.483   4.991  1.00 15.36           C  
ANISOU  949  CZ3 TRP A 985     1840   2814   1183   -173    -32    234       C  
ATOM    950  CH2 TRP A 985      46.320 116.441   4.076  1.00 16.01           C  
ANISOU  950  CH2 TRP A 985     2136   2778   1170    179    343      9       C  
ATOM    951  N   THR A 986      43.503 121.128   1.794  1.00 15.55           N  
ANISOU  951  N   THR A 986     2615   2552    742    136     75   -315       N  
ATOM    952  CA  THR A 986      43.550 121.306   0.348  1.00 18.31           C  
ANISOU  952  CA  THR A 986     3322   2752    885    167    186   -215       C  
ATOM    953  C   THR A 986      44.402 120.216  -0.282  1.00 15.48           C  
ANISOU  953  C   THR A 986     2682   2439    761    467      8     -2       C  
ATOM    954  O   THR A 986      45.527 119.966   0.163  1.00 15.08           O  
ANISOU  954  O   THR A 986     2675   2189    866    364    125   -320       O  
ATOM    955  CB  THR A 986      44.117 122.684  -0.018  1.00 18.11           C  
ANISOU  955  CB  THR A 986     3185   2838    859    152    299    -74       C  
ATOM    956  OG1 THR A 986      43.325 123.709   0.595  1.00 17.53           O  
ANISOU  956  OG1 THR A 986     3133   2662    867    412    -34   -200       O  
ATOM    957  CG2 THR A 986      44.109 122.882  -1.528  1.00 16.80           C  
ANISOU  957  CG2 THR A 986     2814   2838    732    -48    144    -60       C  
ATOM    958  N   LEU A 987      43.860 119.572  -1.314  1.00 14.57           N  
ANISOU  958  N   LEU A 987     2491   2396    650     54     83   -175       N  
ATOM    959  CA  LEU A 987      44.589 118.631  -2.153  1.00 12.33           C  
ANISOU  959  CA  LEU A 987     1782   2214    690   -262    343    -64       C  
ATOM    960  C   LEU A 987      44.642 119.183  -3.569  1.00 15.12           C  
ANISOU  960  C   LEU A 987     2660   2205    881    150    562    -51       C  
ATOM    961  O   LEU A 987      43.676 119.788  -4.042  1.00 18.26           O  
ANISOU  961  O   LEU A 987     2979   2942   1017    234    368   -190       O  
ATOM    962  CB  LEU A 987      43.886 117.271  -2.201  1.00 17.78           C  
ANISOU  962  CB  LEU A 987     2514   2497   1744   -854    249    380       C  
ATOM    963  CG  LEU A 987      43.992 116.323  -1.009  1.00 21.08           C  
ANISOU  963  CG  LEU A 987     2617   2648   2742   -593   -504    432       C  
ATOM    964  CD1 LEU A 987      43.257 115.030  -1.318  1.00 21.73           C  
ANISOU  964  CD1 LEU A 987     2506   2562   3188   -477   -895    438       C  
ATOM    965  CD2 LEU A 987      45.445 116.042  -0.681  1.00 21.74           C  
ANISOU  965  CD2 LEU A 987     2438   2713   3110   -281  -1341    476       C  
ATOM    966  N   GLN A 988      45.767 118.969  -4.247  1.00 16.27           N  
ANISOU  966  N   GLN A 988     3000   2203    978    -57    625    -97       N  
ATOM    967  CA  GLN A 988      45.895 119.388  -5.635  1.00 16.49           C  
ANISOU  967  CA  GLN A 988     2961   2246   1061    101    740     34       C  
ATOM    968  C   GLN A 988      46.839 118.442  -6.361  1.00 14.23           C  
ANISOU  968  C   GLN A 988     2165   2528    714     11    138      0       C  
ATOM    969  O   GLN A 988      47.894 118.081  -5.833  1.00 15.25           O  
ANISOU  969  O   GLN A 988     2145   2688    962   -224    -97   -129       O  
ATOM    970  CB  GLN A 988      46.395 120.833  -5.750  1.00 18.52           C  
ANISOU  970  CB  GLN A 988     3612   2377   1046    -79    549    -50       C  
ATOM    971  CG  GLN A 988      46.375 121.373  -7.174  1.00 20.14           C  
ANISOU  971  CG  GLN A 988     4064   2424   1164     10    510    235       C  
ATOM    972  CD  GLN A 988      46.621 122.868  -7.243  1.00 22.58           C  
ANISOU  972  CD  GLN A 988     4834   2520   1224   -258     89    -89       C  
ATOM    973  OE1 GLN A 988      46.318 123.603  -6.304  1.00 27.04           O  
ANISOU  973  OE1 GLN A 988     5769   2924   1580   -471    138   -120       O  
ATOM    974  NE2 GLN A 988      47.178 123.325  -8.359  1.00 22.93           N  
ANISOU  974  NE2 GLN A 988     4838   2429   1446    -19     40    -85       N  
ATOM    975  N   ASP A 989      46.451 118.041  -7.571  1.00 14.11           N  
ANISOU  975  N   ASP A 989     2345   2384    633    -19    189   -128       N  
ATOM    976  CA  ASP A 989      47.263 117.136  -8.370  1.00 16.28           C  
ANISOU  976  CA  ASP A 989     2837   2523    825   -308    344    -36       C  
ATOM    977  C   ASP A 989      48.289 117.929  -9.182  1.00 16.30           C  
ANISOU  977  C   ASP A 989     2862   2443    888   -373    440     48       C  
ATOM    978  O   ASP A 989      48.522 119.117  -8.943  1.00 16.99           O  
ANISOU  978  O   ASP A 989     3277   2268    912   -205    392   -100       O  
ATOM    979  CB  ASP A 989      46.388 116.193  -9.203  1.00 13.65           C  
ANISOU  979  CB  ASP A 989     2142   2261    785    -71   -542    -95       C  
ATOM    980  CG  ASP A 989      45.551 116.916 -10.254  1.00 15.57           C  
ANISOU  980  CG  ASP A 989     2487   2360   1070   -752   -321   -371       C  
ATOM    981  OD1 ASP A 989      45.788 118.112 -10.526  1.00 19.11           O  
ANISOU  981  OD1 ASP A 989     3682   2481   1099   -665    -37     -6       O  
ATOM    982  OD2 ASP A 989      44.654 116.266 -10.831  1.00 17.13           O  
ANISOU  982  OD2 ASP A 989     3202   2394    912   -646   -193    -13       O  
ATOM    983  N   THR A 990      48.911 117.275 -10.157  1.00 16.34           N  
ANISOU  983  N   THR A 990     2830   2542    836   -590    143     11       N  
ATOM    984  CA  THR A 990      49.907 117.913 -11.007  1.00 16.47           C  
ANISOU  984  CA  THR A 990     2876   2511    870   -266    429    106       C  
ATOM    985  C   THR A 990      49.303 118.566 -12.243  1.00 18.48           C  
ANISOU  985  C   THR A 990     3316   2776    931   -261    387     16       C  
ATOM    986  O   THR A 990      50.053 119.060 -13.091  1.00 19.54           O  
ANISOU  986  O   THR A 990     3404   2984   1036   -198    481    318       O  
ATOM    987  CB  THR A 990      50.974 116.897 -11.428  1.00 17.57           C  
ANISOU  987  CB  THR A 990     3229   2565    881   -111    359     63       C  
ATOM    988  OG1 THR A 990      50.354 115.816 -12.137  1.00 17.83           O  
ANISOU  988  OG1 THR A 990     3511   2274    990   -288    383   -215       O  
ATOM    989  CG2 THR A 990      51.701 116.348 -10.208  1.00 17.41           C  
ANISOU  989  CG2 THR A 990     2802   2911    901   -145    522     11       C  
ATOM    990  N   GLN A 991      47.974 118.586 -12.365  1.00 19.52           N  
ANISOU  990  N   GLN A 991     3508   2877   1031   -100    -18    -11       N  
ATOM    991  CA  GLN A 991      47.301 119.145 -13.533  1.00 19.94           C  
ANISOU  991  CA  GLN A 991     3502   2923   1150   -166   -255     27       C  
ATOM    992  C   GLN A 991      46.276 120.204 -13.139  1.00 17.57           C  
ANISOU  992  C   GLN A 991     2874   2748   1054   -529   -116    -57       C  
ATOM    993  O   GLN A 991      45.243 120.352 -13.799  1.00 19.71           O  
ANISOU  993  O   GLN A 991     3509   2924   1058   -643    -49   -150       O  
ATOM    994  CB  GLN A 991      46.666 118.047 -14.386  1.00 24.06           C  
ANISOU  994  CB  GLN A 991     4719   3124   1299    209   -547   -127       C  
ATOM    995  CG  GLN A 991      47.673 117.094 -15.010  1.00 30.81           C  
ANISOU  995  CG  GLN A 991     6301   3660   1744   -558   -504   -328       C  
ATOM    996  CD  GLN A 991      47.025 115.843 -15.569  1.00 37.46           C  
ANISOU  996  CD  GLN A 991     7843   4364   2025   -796    197   -188       C  
ATOM    997  OE1 GLN A 991      46.358 115.100 -14.848  1.00 39.13           O  
ANISOU  997  OE1 GLN A 991     7975   4642   2252  -1114    171   -279       O  
ATOM    998  NE2 GLN A 991      47.218 115.602 -16.861  1.00 40.01           N  
ANISOU  998  NE2 GLN A 991     8263   4727   2210   -567    776    -30       N  
ATOM    999  N   GLU A 992      46.547 120.940 -12.061  1.00 20.22           N  
ANISOU  999  N   GLU A 992     3789   2851   1041   -378    361     45       N  
ATOM   1000  CA  GLU A 992      45.746 122.079 -11.615  1.00 22.17           C  
ANISOU 1000  CA  GLU A 992     4113   2940   1372   -306    148    302       C  
ATOM   1001  C   GLU A 992      44.339 121.701 -11.161  1.00 22.06           C  
ANISOU 1001  C   GLU A 992     4224   2836   1323   -480   -235    608       C  
ATOM   1002  O   GLU A 992      43.433 122.540 -11.197  1.00 23.77           O  
ANISOU 1002  O   GLU A 992     4494   2676   1860   -263    -85    618       O  
ATOM   1003  CB  GLU A 992      45.702 123.210 -12.652  1.00 23.16           C  
ANISOU 1003  CB  GLU A 992     3876   3201   1723    -16    582    358       C  
ATOM   1004  CG  GLU A 992      47.070 123.686 -13.124  1.00 25.47           C  
ANISOU 1004  CG  GLU A 992     4025   3583   2068   -270    848    191       C  
ATOM   1005  CD  GLU A 992      47.823 124.476 -12.069  1.00 32.50           C  
ANISOU 1005  CD  GLU A 992     5170   4117   3062   -347   1407    287       C  
ATOM   1006  OE1 GLU A 992      47.216 124.839 -11.039  1.00 35.42           O  
ANISOU 1006  OE1 GLU A 992     5198   4512   3746   -616   1200    235       O  
ATOM   1007  OE2 GLU A 992      49.027 124.737 -12.272  1.00 35.49           O  
ANISOU 1007  OE2 GLU A 992     5932   4383   3172   -276   1935    371       O  
ATOM   1008  N   ILE A 993      44.126 120.461 -10.727  1.00 20.89           N  
ANISOU 1008  N   ILE A 993     3843   2846   1248  -1151   -269    377       N  
ATOM   1009  CA  ILE A 993      42.843 120.028 -10.182  1.00 20.02           C  
ANISOU 1009  CA  ILE A 993     3406   3077   1124   -690   -525    144       C  
ATOM   1010  C   ILE A 993      42.944 120.032  -8.664  1.00 18.60           C  
ANISOU 1010  C   ILE A 993     2712   3373    981   -381   -368    214       C  
ATOM   1011  O   ILE A 993      43.863 119.433  -8.094  1.00 18.33           O  
ANISOU 1011  O   ILE A 993     2632   3456    877   -114    -38    130       O  
ATOM   1012  CB  ILE A 993      42.450 118.639 -10.713  1.00 21.08           C  
ANISOU 1012  CB  ILE A 993     3643   3151   1214   -700   -571   -123       C  
ATOM   1013  CG1 ILE A 993      42.362 118.661 -12.241  1.00 21.36           C  
ANISOU 1013  CG1 ILE A 993     3691   3291   1133    -54   -671     80       C  
ATOM   1014  CG2 ILE A 993      41.126 118.195 -10.112  1.00 20.82           C  
ANISOU 1014  CG2 ILE A 993     3628   2975   1309   -898   -370   -422       C  
ATOM   1015  CD1 ILE A 993      41.371 119.671 -12.781  1.00 24.11           C  
ANISOU 1015  CD1 ILE A 993     4332   3409   1420    199   -911    -87       C  
ATOM   1016  N   LYS A 994      41.995 120.700  -8.009  1.00 19.56           N  
ANISOU 1016  N   LYS A 994     3002   3450    981   -197    413    185       N  
ATOM   1017  CA  LYS A 994      42.068 120.982  -6.583  1.00 22.25           C  
ANISOU 1017  CA  LYS A 994     3332   3842   1279   -243    784    215       C  
ATOM   1018  C   LYS A 994      40.745 120.637  -5.913  1.00 21.08           C  
ANISOU 1018  C   LYS A 994     3518   3553    938    -15    293    187       C  
ATOM   1019  O   LYS A 994      39.675 120.749  -6.518  1.00 22.28           O  
ANISOU 1019  O   LYS A 994     3516   3913   1036     55   -363     91       O  
ATOM   1020  CB  LYS A 994      42.380 122.474  -6.358  1.00 26.76           C  
ANISOU 1020  CB  LYS A 994     4216   4056   1896   -809    876    121       C  
ATOM   1021  CG  LYS A 994      42.349 122.936  -4.910  1.00 33.63           C  
ANISOU 1021  CG  LYS A 994     5581   4380   2816   -467    379    268       C  
ATOM   1022  CD  LYS A 994      42.122 124.437  -4.822  1.00 38.74           C  
ANISOU 1022  CD  LYS A 994     6559   4736   3424   -604    423    465       C  
ATOM   1023  CE  LYS A 994      43.227 125.208  -5.524  1.00 41.14           C  
ANISOU 1023  CE  LYS A 994     6757   5092   3781   -388    877    824       C  
ATOM   1024  NZ  LYS A 994      44.547 125.003  -4.867  1.00 44.42           N  
ANISOU 1024  NZ  LYS A 994     7421   5328   4128   -244   1361    892       N  
ATOM   1025  N   GLN A 995      40.828 120.207  -4.653  1.00 19.20           N  
ANISOU 1025  N   GLN A 995     3063   3370    863    -46    203     31       N  
ATOM   1026  CA  GLN A 995      39.654 119.986  -3.821  1.00 20.44           C  
ANISOU 1026  CA  GLN A 995     3346   3503    919    129   -220    -83       C  
ATOM   1027  C   GLN A 995      39.956 120.446  -2.402  1.00 18.01           C  
ANISOU 1027  C   GLN A 995     2722   3231    891    334   -245   -146       C  
ATOM   1028  O   GLN A 995      41.086 120.307  -1.925  1.00 18.38           O  
ANISOU 1028  O   GLN A 995     2722   3241   1020    501   -408   -317       O  
ATOM   1029  CB  GLN A 995      39.231 118.510  -3.814  1.00 19.82           C  
ANISOU 1029  CB  GLN A 995     2911   3630    990    433   -176   -197       C  
ATOM   1030  CG  GLN A 995      37.956 118.224  -3.027  1.00 19.59           C  
ANISOU 1030  CG  GLN A 995     2560   3701   1181    880   -370   -423       C  
ATOM   1031  CD  GLN A 995      36.761 119.015  -3.531  1.00 21.03           C  
ANISOU 1031  CD  GLN A 995     2791   3822   1379    826    -32   -799       C  
ATOM   1032  OE1 GLN A 995      36.551 120.165  -3.143  1.00 24.95           O  
ANISOU 1032  OE1 GLN A 995     3522   4221   1738     71   -812   -506       O  
ATOM   1033  NE2 GLN A 995      35.968 118.398  -4.399  1.00 24.07           N  
ANISOU 1033  NE2 GLN A 995     3624   3815   1706   1085   -459   -995       N  
ATOM   1034  N   ARG A 996      38.943 121.000  -1.736  1.00 19.64           N  
ANISOU 1034  N   ARG A 996     3284   3317    861     20    123   -222       N  
ATOM   1035  CA  ARG A 996      39.078 121.519  -0.383  1.00 22.14           C  
ANISOU 1035  CA  ARG A 996     3697   3595   1120    135    213    -12       C  
ATOM   1036  C   ARG A 996      37.969 120.960   0.495  1.00 19.55           C  
ANISOU 1036  C   ARG A 996     3049   3422    957    428   -246      2       C  
ATOM   1037  O   ARG A 996      36.831 120.796   0.045  1.00 20.11           O  
ANISOU 1037  O   ARG A 996     2754   3659   1226    152   -373   -385       O  
ATOM   1038  CB  ARG A 996      38.996 123.055  -0.371  1.00 24.74           C  
ANISOU 1038  CB  ARG A 996     4193   3805   1402   -369    151    -19       C  
ATOM   1039  CG  ARG A 996      40.053 123.746  -1.220  1.00 28.96           C  
ANISOU 1039  CG  ARG A 996     5175   4000   1830    204   -514     65       C  
ATOM   1040  CD  ARG A 996      39.699 125.203  -1.502  1.00 31.64           C  
ANISOU 1040  CD  ARG A 996     5912   4253   1857    927   -783    -61       C  
ATOM   1041  NE  ARG A 996      39.880 126.067  -0.337  1.00 35.39           N  
ANISOU 1041  NE  ARG A 996     6758   4582   2105   1344   -648    -14       N  
ATOM   1042  CZ  ARG A 996      38.884 126.593   0.368  1.00 35.98           C  
ANISOU 1042  CZ  ARG A 996     6765   4704   2202   1357  -1157   -176       C  
ATOM   1043  NH1 ARG A 996      37.626 126.347   0.029  1.00 35.94           N  
ANISOU 1043  NH1 ARG A 996     6152   4964   2541   1548  -1034   -178       N  
ATOM   1044  NH2 ARG A 996      39.145 127.370   1.411  1.00 33.69           N  
ANISOU 1044  NH2 ARG A 996     6105   4515   2179   1035  -1365   -321       N  
ATOM   1045  N   VAL A 997      38.310 120.660   1.747  1.00 19.47           N  
ANISOU 1045  N   VAL A 997     3130   3253   1017    438   -352   -331       N  
ATOM   1046  CA  VAL A 997      37.334 120.345   2.784  1.00 20.21           C  
ANISOU 1046  CA  VAL A 997     3527   2926   1226    779   -450   -526       C  
ATOM   1047  C   VAL A 997      37.579 121.283   3.957  1.00 18.34           C  
ANISOU 1047  C   VAL A 997     2842   2996   1131    240   -500   -612       C  
ATOM   1048  O   VAL A 997      38.728 121.526   4.341  1.00 18.47           O  
ANISOU 1048  O   VAL A 997     3077   3005    936    -70   -259   -518       O  
ATOM   1049  CB  VAL A 997      37.373 118.861   3.216  1.00 23.83           C  
ANISOU 1049  CB  VAL A 997     4260   3093   1701    752  -1046   -603       C  
ATOM   1050  CG1 VAL A 997      36.995 117.960   2.050  1.00 27.08           C  
ANISOU 1050  CG1 VAL A 997     5204   3209   1877    717  -1127   -576       C  
ATOM   1051  CG2 VAL A 997      38.741 118.482   3.752  1.00 28.91           C  
ANISOU 1051  CG2 VAL A 997     5925   3295   1765    103   -699   -518       C  
ATOM   1052  N   VAL A 998      36.500 121.834   4.510  1.00 18.27           N  
ANISOU 1052  N   VAL A 998     2457   3216   1270    599     24   -813       N  
ATOM   1053  CA  VAL A 998      36.583 122.933   5.463  1.00 17.13           C  
ANISOU 1053  CA  VAL A 998     2653   2847   1008    547   -118   -555       C  
ATOM   1054  C   VAL A 998      35.758 122.605   6.699  1.00 18.54           C  
ANISOU 1054  C   VAL A 998     2984   2916   1145    126    -30   -821       C  
ATOM   1055  O   VAL A 998      34.661 122.045   6.597  1.00 21.20           O  
ANISOU 1055  O   VAL A 998     3413   3314   1329   -401     27   -887       O  
ATOM   1056  CB  VAL A 998      36.105 124.261   4.832  1.00 19.93           C  
ANISOU 1056  CB  VAL A 998     3422   3095   1056    558   -133   -422       C  
ATOM   1057  CG1 VAL A 998      36.282 125.417   5.806  1.00 23.50           C  
ANISOU 1057  CG1 VAL A 998     4321   3406   1201    323    377   -280       C  
ATOM   1058  CG2 VAL A 998      36.846 124.539   3.530  1.00 20.73           C  
ANISOU 1058  CG2 VAL A 998     3409   3302   1165    377   -336   -623       C  
ATOM   1059  N   PHE A 999      36.294 122.952   7.866  1.00 17.97           N  
ANISOU 1059  N   PHE A 999     3083   2707   1038    195    205   -640       N  
ATOM   1060  CA  PHE A 999      35.542 122.988   9.112  1.00 19.07           C  
ANISOU 1060  CA  PHE A 999     3389   2916    942    191   -138   -369       C  
ATOM   1061  C   PHE A 999      35.336 124.446   9.498  1.00 17.83           C  
ANISOU 1061  C   PHE A 999     3058   2701   1017    367   -385   -471       C  
ATOM   1062  O   PHE A 999      36.304 125.208   9.589  1.00 17.51           O  
ANISOU 1062  O   PHE A 999     2996   2336   1324    302   -326   -499       O  
ATOM   1063  CB  PHE A 999      36.291 122.258  10.229  1.00 19.83           C  
ANISOU 1063  CB  PHE A 999     3563   3038    932    278    -24   -150       C  
ATOM   1064  CG  PHE A 999      35.770 122.561  11.608  1.00 18.52           C  
ANISOU 1064  CG  PHE A 999     3190   2913    933    125   -200   -327       C  
ATOM   1065  CD1 PHE A 999      34.494 122.171  11.984  1.00 19.07           C  
ANISOU 1065  CD1 PHE A 999     3104   3052   1090    401    328   -338       C  
ATOM   1066  CD2 PHE A 999      36.557 123.234  12.529  1.00 20.83           C  
ANISOU 1066  CD2 PHE A 999     4116   2684   1116     83   -214   -337       C  
ATOM   1067  CE1 PHE A 999      34.013 122.449  13.251  1.00 21.63           C  
ANISOU 1067  CE1 PHE A 999     4005   2953   1259    510     75   -368       C  
ATOM   1068  CE2 PHE A 999      36.081 123.514  13.798  1.00 19.05           C  
ANISOU 1068  CE2 PHE A 999     3459   2603   1176    784     59   -245       C  
ATOM   1069  CZ  PHE A 999      34.808 123.121  14.159  1.00 20.15           C  
ANISOU 1069  CZ  PHE A 999     3796   2574   1285    504    445   -482       C  
ATOM   1070  N   LYS A1000      34.082 124.831   9.712  1.00 18.63           N  
ANISOU 1070  N   LYS A1000     3136   2935   1010    520   -180    -89       N  
ATOM   1071  CA  LYS A1000      33.725 126.207  10.022  1.00 17.18           C  
ANISOU 1071  CA  LYS A1000     2627   2950    950    830    -98    194       C  
ATOM   1072  C   LYS A1000      33.218 126.307  11.454  1.00 18.69           C  
ANISOU 1072  C   LYS A1000     2895   2978   1230    418    159    -45       C  
ATOM   1073  O   LYS A1000      32.415 125.480  11.898  1.00 20.38           O  
ANISOU 1073  O   LYS A1000     3388   2956   1398   -261    499   -162       O  
ATOM   1074  CB  LYS A1000      32.640 126.715   9.069  1.00 22.53           C  
ANISOU 1074  CB  LYS A1000     4037   3279   1246    811   -177    381       C  
ATOM   1075  CG  LYS A1000      33.059 126.762   7.609  1.00 23.85           C  
ANISOU 1075  CG  LYS A1000     4043   3734   1285    758   -401    279       C  
ATOM   1076  CD  LYS A1000      31.916 127.243   6.729  1.00 27.04           C  
ANISOU 1076  CD  LYS A1000     4620   4049   1606    970   -721    275       C  
ATOM   1077  CE  LYS A1000      32.348 127.370   5.278  1.00 30.72           C  
ANISOU 1077  CE  LYS A1000     5370   4371   1932    972  -1119    126       C  
ATOM   1078  NZ  LYS A1000      31.230 127.829   4.407  1.00 36.58           N  
ANISOU 1078  NZ  LYS A1000     7006   4623   2270    889   -610     34       N  
ATOM   1079  N   TYR A1001      33.692 127.324  12.172  1.00 16.09           N  
ANISOU 1079  N   TYR A1001     2435   2552   1126    641    325   -263       N  
ATOM   1080  CA  TYR A1001      33.210 127.619  13.512  1.00 17.12           C  
ANISOU 1080  CA  TYR A1001     2873   2378   1254    248    187   -361       C  
ATOM   1081  C   TYR A1001      32.995 129.119  13.646  1.00 14.78           C  
ANISOU 1081  C   TYR A1001     1721   2487   1407    148    471   -221       C  
ATOM   1082  O   TYR A1001      33.720 129.922  13.053  1.00 18.43           O  
ANISOU 1082  O   TYR A1001     2680   2547   1775    156    677   -163       O  
ATOM   1083  CB  TYR A1001      34.157 127.100  14.607  1.00 15.64           C  
ANISOU 1083  CB  TYR A1001     2888   2003   1053    301   -207     36       C  
ATOM   1084  CG  TYR A1001      35.539 127.716  14.602  1.00 16.51           C  
ANISOU 1084  CG  TYR A1001     3023   2247   1003    399   -321   -178       C  
ATOM   1085  CD1 TYR A1001      35.841 128.797  15.420  1.00 14.58           C  
ANISOU 1085  CD1 TYR A1001     2258   2269   1011   -390    -83   -234       C  
ATOM   1086  CD2 TYR A1001      36.545 127.207  13.791  1.00 18.35           C  
ANISOU 1086  CD2 TYR A1001     3440   2460   1071    428    262   -416       C  
ATOM   1087  CE1 TYR A1001      37.103 129.360  15.425  1.00 14.75           C  
ANISOU 1087  CE1 TYR A1001     2336   2279    990   -143    226    -46       C  
ATOM   1088  CE2 TYR A1001      37.811 127.763  13.789  1.00 17.34           C  
ANISOU 1088  CE2 TYR A1001     3267   2403    919    100    186   -354       C  
ATOM   1089  CZ  TYR A1001      38.085 128.840  14.608  1.00 16.34           C  
ANISOU 1089  CZ  TYR A1001     2848   2324   1035     -7    659    -38       C  
ATOM   1090  OH  TYR A1001      39.343 129.397  14.610  1.00 17.27           O  
ANISOU 1090  OH  TYR A1001     3134   2426   1000   -213    512     22       O  
ATOM   1091  N   SER A1002      31.987 129.487  14.428  1.00 16.36           N  
ANISOU 1091  N   SER A1002     2347   2592   1276    129   -123   -405       N  
ATOM   1092  CA  SER A1002      31.567 130.872  14.564  1.00 15.19           C  
ANISOU 1092  CA  SER A1002     1736   2741   1294    144   -171   -640       C  
ATOM   1093  C   SER A1002      32.220 131.523  15.776  1.00 15.49           C  
ANISOU 1093  C   SER A1002     2006   2786   1093   -325    -73   -301       C  
ATOM   1094  O   SER A1002      32.535 130.861  16.769  1.00 17.71           O  
ANISOU 1094  O   SER A1002     2699   2867   1162   -107   -278     35       O  
ATOM   1095  CB  SER A1002      30.046 130.958  14.705  1.00 20.26           C  
ANISOU 1095  CB  SER A1002     2875   2914   1910    351   -415   -850       C  
ATOM   1096  OG  SER A1002      29.637 132.279  15.014  1.00 19.89           O  
ANISOU 1096  OG  SER A1002     2662   3081   1816    201   -464  -1051       O  
ATOM   1097  N   GLN A1003      32.423 132.835  15.679  1.00 17.08           N  
ANISOU 1097  N   GLN A1003     2841   2751    898     28    276   -119       N  
ATOM   1098  CA  GLN A1003      32.835 133.647  16.815  1.00 16.41           C  
ANISOU 1098  CA  GLN A1003     2839   2614    780     12    304   -171       C  
ATOM   1099  C   GLN A1003      31.707 134.517  17.349  1.00 16.84           C  
ANISOU 1099  C   GLN A1003     2807   2804    786    265    121     11       C  
ATOM   1100  O   GLN A1003      31.923 135.280  18.297  1.00 16.19           O  
ANISOU 1100  O   GLN A1003     2463   2832    855    178     17   -173       O  
ATOM   1101  CB  GLN A1003      34.062 134.499  16.467  1.00 14.77           C  
ANISOU 1101  CB  GLN A1003     2226   2403    982    152    365   -205       C  
ATOM   1102  CG  GLN A1003      35.300 133.676  16.138  1.00 15.50           C  
ANISOU 1102  CG  GLN A1003     2484   2259   1146    112    316   -176       C  
ATOM   1103  CD  GLN A1003      36.592 134.444  16.340  1.00 16.10           C  
ANISOU 1103  CD  GLN A1003     2781   2141   1196    741    264   -124       C  
ATOM   1104  OE1 GLN A1003      37.665 133.852  16.464  1.00 15.08           O  
ANISOU 1104  OE1 GLN A1003     2895   1798   1035     41    446     32       O  
ATOM   1105  NE2 GLN A1003      36.497 135.769  16.376  1.00 13.92           N  
ANISOU 1105  NE2 GLN A1003     2370   1792   1127    383    215   -103       N  
ATOM   1106  N   MET A1004      30.512 134.424  16.763  1.00 15.35           N  
ANISOU 1106  N   MET A1004     2043   2779   1012    392    -32    -91       N  
ATOM   1107  CA  MET A1004      29.318 135.086  17.282  1.00 15.46           C  
ANISOU 1107  CA  MET A1004     2211   2662   1000     58    131     -7       C  
ATOM   1108  C   MET A1004      28.520 134.025  18.034  1.00 15.37           C  
ANISOU 1108  C   MET A1004     1805   3020   1017    391    311    110       C  
ATOM   1109  O   MET A1004      27.522 133.492  17.549  1.00 16.37           O  
ANISOU 1109  O   MET A1004     1924   2974   1322    155   -286     -3       O  
ATOM   1110  CB  MET A1004      28.510 135.697  16.142  1.00 18.33           C  
ANISOU 1110  CB  MET A1004     2899   2831   1235     11   -411    151       C  
ATOM   1111  CG  MET A1004      29.323 136.560  15.195  1.00 21.23           C  
ANISOU 1111  CG  MET A1004     3494   3048   1524   -217   -682    316       C  
ATOM   1112  SD  MET A1004      30.124 137.942  16.027  1.00 24.75           S  
ANISOU 1112  SD  MET A1004     4017   3517   1869   -510   -895    732       S  
ATOM   1113  CE  MET A1004      30.922 138.744  14.641  1.00 24.52           C  
ANISOU 1113  CE  MET A1004     3922   3276   2117   -152   -642    922       C  
ATOM   1114  N   ILE A1005      28.984 133.714  19.240  1.00 16.46           N  
ANISOU 1114  N   ILE A1005     2375   3031    849    419    237     97       N  
ATOM   1115  CA  ILE A1005      28.446 132.594  20.002  1.00 14.29           C  
ANISOU 1115  CA  ILE A1005     1681   2655   1095    385    600     70       C  
ATOM   1116  C   ILE A1005      28.735 132.840  21.476  1.00 15.11           C  
ANISOU 1116  C   ILE A1005     2004   2888    850    423    304    172       C  
ATOM   1117  O   ILE A1005      29.795 133.359  21.836  1.00 17.25           O  
ANISOU 1117  O   ILE A1005     2551   3174    828    305    -80    -10       O  
ATOM   1118  CB  ILE A1005      29.035 131.255  19.492  1.00 15.51           C  
ANISOU 1118  CB  ILE A1005     2056   2768   1070    890    332     39       C  
ATOM   1119  CG1 ILE A1005      28.423 130.064  20.231  1.00 20.13           C  
ANISOU 1119  CG1 ILE A1005     3962   2487   1201    126     49    173       C  
ATOM   1120  CG2 ILE A1005      30.555 131.255  19.605  1.00 18.37           C  
ANISOU 1120  CG2 ILE A1005     2900   2716   1364    544    350    292       C  
ATOM   1121  CD1 ILE A1005      28.857 128.724  19.673  1.00 22.21           C  
ANISOU 1121  CD1 ILE A1005     4456   2567   1415   -759    314    241       C  
ATOM   1122  N   ASN A1006      27.772 132.477  22.328  1.00 15.39           N  
ANISOU 1122  N   ASN A1006     2372   2630    846    433    395    102       N  
ATOM   1123  CA  ASN A1006      27.921 132.696  23.764  1.00 15.93           C  
ANISOU 1123  CA  ASN A1006     2387   2570   1097    285    415    328       C  
ATOM   1124  C   ASN A1006      29.091 131.895  24.324  1.00 16.76           C  
ANISOU 1124  C   ASN A1006     2728   2391   1248    213    387    196       C  
ATOM   1125  O   ASN A1006      30.028 132.457  24.904  1.00 17.17           O  
ANISOU 1125  O   ASN A1006     3147   2400    977     45    470   -120       O  
ATOM   1126  CB  ASN A1006      26.619 132.339  24.486  1.00 16.47           C  
ANISOU 1126  CB  ASN A1006     1879   2805   1573    801    503    571       C  
ATOM   1127  CG  ASN A1006      25.538 133.383  24.290  1.00 23.49           C  
ANISOU 1127  CG  ASN A1006     3073   3352   2502   -145   1201    624       C  
ATOM   1128  OD1 ASN A1006      25.674 134.288  23.467  1.00 25.98           O  
ANISOU 1128  OD1 ASN A1006     3320   3438   3113   -320    962    853       O  
ATOM   1129  ND2 ASN A1006      24.455 133.262  25.049  1.00 28.21           N  
ANISOU 1129  ND2 ASN A1006     4110   3656   2954    160   1088    545       N  
ATOM   1130  N   ILE A1007      29.049 130.574  24.165  1.00 15.86           N  
ANISOU 1130  N   ILE A1007     2440   2265   1321    317    604    303       N  
ATOM   1131  CA  ILE A1007      30.111 129.683  24.617  1.00 16.34           C  
ANISOU 1131  CA  ILE A1007     2597   2452   1158    597    459    202       C  
ATOM   1132  C   ILE A1007      30.501 128.799  23.443  1.00 16.31           C  
ANISOU 1132  C   ILE A1007     2633   2529   1036    549    479   -129       C  
ATOM   1133  O   ILE A1007      29.666 128.049  22.924  1.00 19.24           O  
ANISOU 1133  O   ILE A1007     2944   2879   1485   -116    461   -301       O  
ATOM   1134  CB  ILE A1007      29.674 128.824  25.815  1.00 19.06           C  
ANISOU 1134  CB  ILE A1007     3358   2629   1254    532    531    240       C  
ATOM   1135  CG1 ILE A1007      29.252 129.710  26.990  1.00 21.98           C  
ANISOU 1135  CG1 ILE A1007     3839   2824   1689    741    509   -145       C  
ATOM   1136  CG2 ILE A1007      30.793 127.879  26.227  1.00 19.88           C  
ANISOU 1136  CG2 ILE A1007     3533   2716   1304    934    502    412       C  
ATOM   1137  CD1 ILE A1007      30.387 130.506  27.596  1.00 24.16           C  
ANISOU 1137  CD1 ILE A1007     4495   2731   1952   1233    568   -454       C  
ATOM   1138  N   SER A1008      31.761 128.884  23.026  1.00 14.68           N  
ANISOU 1138  N   SER A1008     2075   2541    961    642    421   -135       N  
ATOM   1139  CA  SER A1008      32.257 128.132  21.884  1.00 16.52           C  
ANISOU 1139  CA  SER A1008     2837   2401   1037    430    620   -135       C  
ATOM   1140  C   SER A1008      33.053 126.921  22.350  1.00 17.01           C  
ANISOU 1140  C   SER A1008     2958   2315   1192    -50    299   -220       C  
ATOM   1141  O   SER A1008      33.855 127.011  23.284  1.00 15.93           O  
ANISOU 1141  O   SER A1008     2230   2231   1594      4     42   -274       O  
ATOM   1142  CB  SER A1008      33.146 129.010  21.003  1.00 15.91           C  
ANISOU 1142  CB  SER A1008     2443   2611    992    117    702   -178       C  
ATOM   1143  OG  SER A1008      33.751 128.245  19.974  1.00 16.84           O  
ANISOU 1143  OG  SER A1008     2660   2748    990    500    145   -123       O  
ATOM   1144  N   ASP A1009      32.827 125.787  21.686  1.00 16.26           N  
ANISOU 1144  N   ASP A1009     2915   2008   1256    164    -33     85       N  
ATOM   1145  CA  ASP A1009      33.604 124.585  21.950  1.00 17.20           C  
ANISOU 1145  CA  ASP A1009     2789   2363   1382    525    128   -159       C  
ATOM   1146  C   ASP A1009      34.955 124.592  21.250  1.00 14.76           C  
ANISOU 1146  C   ASP A1009     2283   2326   1001   -159    404    -46       C  
ATOM   1147  O   ASP A1009      35.764 123.691  21.495  1.00 16.25           O  
ANISOU 1147  O   ASP A1009     3007   2316    849    543    129   -110       O  
ATOM   1148  CB  ASP A1009      32.827 123.342  21.504  1.00 20.08           C  
ANISOU 1148  CB  ASP A1009     2834   2704   2090   -278     50   -467       C  
ATOM   1149  CG  ASP A1009      31.513 123.177  22.239  1.00 22.21           C  
ANISOU 1149  CG  ASP A1009     2739   3133   2567   -769     51   -546       C  
ATOM   1150  OD1 ASP A1009      31.360 123.763  23.331  1.00 27.55           O  
ANISOU 1150  OD1 ASP A1009     4105   3481   2883   -385    883   -422       O  
ATOM   1151  OD2 ASP A1009      30.633 122.454  21.725  1.00 27.53           O  
ANISOU 1151  OD2 ASP A1009     4491   3314   2656  -1147    719   -487       O  
ATOM   1152  N   TYR A1010      35.222 125.580  20.397  1.00 15.00           N  
ANISOU 1152  N   TYR A1010     2518   2425    755   -466    -59    -62       N  
ATOM   1153  CA  TYR A1010      36.380 125.546  19.516  1.00 14.60           C  
ANISOU 1153  CA  TYR A1010     2645   2189    715   -210   -113    110       C  
ATOM   1154  C   TYR A1010      37.311 126.741  19.650  1.00 15.58           C  
ANISOU 1154  C   TYR A1010     3089   2020    812    -66     38   -219       C  
ATOM   1155  O   TYR A1010      38.519 126.580  19.463  1.00 15.34           O  
ANISOU 1155  O   TYR A1010     2605   2109   1115    327    170   -343       O  
ATOM   1156  CB  TYR A1010      35.926 125.417  18.053  1.00 14.96           C  
ANISOU 1156  CB  TYR A1010     2765   1942    978     75   -495   -183       C  
ATOM   1157  CG  TYR A1010      34.900 124.325  17.854  1.00 14.51           C  
ANISOU 1157  CG  TYR A1010     2365   2217    929   -433   -238   -476       C  
ATOM   1158  CD1 TYR A1010      35.264 122.987  17.920  1.00 16.89           C  
ANISOU 1158  CD1 TYR A1010     3204   2093   1122    402    -57   -585       C  
ATOM   1159  CD2 TYR A1010      33.567 124.631  17.612  1.00 16.71           C  
ANISOU 1159  CD2 TYR A1010     2975   2273   1102   -228    -37   -679       C  
ATOM   1160  CE1 TYR A1010      34.331 121.983  17.746  1.00 18.21           C  
ANISOU 1160  CE1 TYR A1010     3657   2049   1211   -623    548   -397       C  
ATOM   1161  CE2 TYR A1010      32.626 123.633  17.436  1.00 19.61           C  
ANISOU 1161  CE2 TYR A1010     3663   2433   1356   -157   -178   -543       C  
ATOM   1162  CZ  TYR A1010      33.015 122.311  17.504  1.00 17.35           C  
ANISOU 1162  CZ  TYR A1010     2985   2154   1454   -616    -51   -560       C  
ATOM   1163  OH  TYR A1010      32.085 121.312  17.330  1.00 23.68           O  
ANISOU 1163  OH  TYR A1010     4644   2220   2134   -962    -91   -648       O  
ATOM   1164  N   ILE A1011      36.794 127.927  19.969  1.00 15.11           N  
ANISOU 1164  N   ILE A1011     3001   1892    848    131   -390   -116       N  
ATOM   1165  CA  ILE A1011      37.628 129.122  20.038  1.00 15.63           C  
ANISOU 1165  CA  ILE A1011     2949   1816   1175    259   -202   -180       C  
ATOM   1166  C   ILE A1011      38.630 128.977  21.177  1.00 11.88           C  
ANISOU 1166  C   ILE A1011     1452   1894   1166    281    -41    -22       C  
ATOM   1167  O   ILE A1011      38.249 128.870  22.348  1.00 14.63           O  
ANISOU 1167  O   ILE A1011     2495   2218    844   -239    110   -178       O  
ATOM   1168  CB  ILE A1011      36.769 130.379  20.217  1.00 13.89           C  
ANISOU 1168  CB  ILE A1011     2700   1351   1226    495   -471    228       C  
ATOM   1169  CG1 ILE A1011      35.823 130.563  19.030  1.00 15.47           C  
ANISOU 1169  CG1 ILE A1011     3102   1426   1350    774   -439    190       C  
ATOM   1170  CG2 ILE A1011      37.652 131.601  20.382  1.00 14.63           C  
ANISOU 1170  CG2 ILE A1011     3149   1456    953     62   -425     44       C  
ATOM   1171  CD1 ILE A1011      34.879 131.732  19.193  1.00 19.37           C  
ANISOU 1171  CD1 ILE A1011     3973   1673   1712    410   -177    379       C  
ATOM   1172  N   ASN A1012      39.919 128.977  20.833  1.00 13.09           N  
ANISOU 1172  N   ASN A1012     2068   1953    954   -163    -34    104       N  
ATOM   1173  CA  ASN A1012      41.017 128.966  21.801  1.00 13.25           C  
ANISOU 1173  CA  ASN A1012     2029   2234    770    -24   -132    -17       C  
ATOM   1174  C   ASN A1012      41.057 127.694  22.645  1.00 15.26           C  
ANISOU 1174  C   ASN A1012     2922   2003    874   -116    490    -61       C  
ATOM   1175  O   ASN A1012      41.679 127.670  23.712  1.00 15.45           O  
ANISOU 1175  O   ASN A1012     2799   2286    784   -141    349     50       O  
ATOM   1176  CB  ASN A1012      41.024 130.222  22.683  1.00 13.92           C  
ANISOU 1176  CB  ASN A1012     2170   2251    867     70   -295   -276       C  
ATOM   1177  CG  ASN A1012      42.368 130.468  23.340  1.00 15.71           C  
ANISOU 1177  CG  ASN A1012     2079   2687   1203   -293   -396   -407       C  
ATOM   1178  OD1 ASN A1012      43.418 130.265  22.729  1.00 16.05           O  
ANISOU 1178  OD1 ASN A1012     2283   2472   1343   -121     62   -117       O  
ATOM   1179  ND2 ASN A1012      42.341 130.894  24.598  1.00 15.16           N  
ANISOU 1179  ND2 ASN A1012     1875   2999    887   -116   -207   -249       N  
ATOM   1180  N   ARG A1013      40.412 126.625  22.188  1.00 13.81           N  
ANISOU 1180  N   ARG A1013     2316   2095    837    -84    330   -136       N  
ATOM   1181  CA AARG A1013      40.386 125.364  22.909  0.37 13.40           C  
ANISOU 1181  CA AARG A1013     2195   1991    905     55    356     22       C  
ATOM   1182  CA BARG A1013      40.374 125.360  22.906  0.63 13.77           C  
ANISOU 1182  CA BARG A1013     2252   2067    912    113    364     77       C  
ATOM   1183  C   ARG A1013      40.981 124.266  22.038  1.00 14.63           C  
ANISOU 1183  C   ARG A1013     2692   1942    924     94    517   -114       C  
ATOM   1184  O   ARG A1013      40.888 124.307  20.808  1.00 15.74           O  
ANISOU 1184  O   ARG A1013     2836   2325    820    -59    253   -336       O  
ATOM   1185  CB AARG A1013      38.957 125.002  23.317  0.37 12.63           C  
ANISOU 1185  CB AARG A1013     1960   1986    853    124    307    143       C  
ATOM   1186  CB BARG A1013      38.934 124.980  23.283  0.63 14.78           C  
ANISOU 1186  CB BARG A1013     2551   2127    938    402    592    177       C  
ATOM   1187  CG AARG A1013      38.238 126.139  24.024  0.37 10.85           C  
ANISOU 1187  CG AARG A1013     1222   1948    954    -52    150    224       C  
ATOM   1188  CG BARG A1013      38.187 126.069  24.040  0.63 15.55           C  
ANISOU 1188  CG BARG A1013     2579   2262   1067    373    449    380       C  
ATOM   1189  CD AARG A1013      36.788 125.807  24.297  0.37 10.78           C  
ANISOU 1189  CD AARG A1013     1452   1839    804    -99    -25    307       C  
ATOM   1190  CD BARG A1013      36.741 125.683  24.330  0.63 17.64           C  
ANISOU 1190  CD BARG A1013     3346   2242   1114    504    427    474       C  
ATOM   1191  NE AARG A1013      36.646 124.811  25.352  0.37 12.26           N  
ANISOU 1191  NE AARG A1013     1657   2024    979    -62    -33    291       N  
ATOM   1192  NE BARG A1013      36.623 124.759  25.456  0.63 19.77           N  
ANISOU 1192  NE BARG A1013     3753   2542   1217    866    283    466       N  
ATOM   1193  CZ AARG A1013      35.477 124.396  25.826  0.37 12.29           C  
ANISOU 1193  CZ AARG A1013     1207   2251   1211    155    -45    301       C  
ATOM   1194  CZ BARG A1013      36.323 123.469  25.341  0.63 21.13           C  
ANISOU 1194  CZ BARG A1013     3917   2855   1256   1076    249    405       C  
ATOM   1195  NH1AARG A1013      34.352 124.897  25.334  0.37 14.09           N  
ANISOU 1195  NH1AARG A1013     1590   2421   1342    142   -196    101       N  
ATOM   1196  NH1BARG A1013      36.102 122.940  24.146  0.63 23.43           N  
ANISOU 1196  NH1BARG A1013     4544   3057   1301    924   -106    251       N  
ATOM   1197  NH2AARG A1013      35.433 123.487  26.790  0.37 12.83           N  
ANISOU 1197  NH2AARG A1013     1439   2148   1289    -27    468    362       N  
ATOM   1198  NH2BARG A1013      36.237 122.709  26.424  0.63 20.64           N  
ANISOU 1198  NH2BARG A1013     3447   2904   1490   1330     76    330       N  
ATOM   1199  N   TRP A1014      41.605 123.287  22.690  1.00 14.27           N  
ANISOU 1199  N   TRP A1014     2714   1759    950    454    -87   -100       N  
ATOM   1200  CA  TRP A1014      42.247 122.199  21.963  1.00 13.17           C  
ANISOU 1200  CA  TRP A1014     2112   1934    959    567    -73   -336       C  
ATOM   1201  C   TRP A1014      41.225 121.420  21.145  1.00 13.71           C  
ANISOU 1201  C   TRP A1014     1911   2258   1042   -962    241   -419       C  
ATOM   1202  O   TRP A1014      40.195 120.980  21.664  1.00 16.75           O  
ANISOU 1202  O   TRP A1014     2552   2626   1187   -561    604   -582       O  
ATOM   1203  CB  TRP A1014      42.975 121.267  22.932  1.00 15.77           C  
ANISOU 1203  CB  TRP A1014     3031   2101    861    186   -196    -72       C  
ATOM   1204  CG  TRP A1014      44.320 121.778  23.359  1.00 14.87           C  
ANISOU 1204  CG  TRP A1014     2616   2220    813    215   -119     -6       C  
ATOM   1205  CD1 TRP A1014      44.658 122.279  24.582  1.00 13.15           C  
ANISOU 1205  CD1 TRP A1014     1986   2268    743    341    -51   -109       C  
ATOM   1206  CD2 TRP A1014      45.507 121.845  22.557  1.00 15.31           C  
ANISOU 1206  CD2 TRP A1014     2794   2280    743     39    -72   -255       C  
ATOM   1207  NE1 TRP A1014      45.981 122.649  24.594  1.00 13.39           N  
ANISOU 1207  NE1 TRP A1014     2182   2253    652    200   -142   -218       N  
ATOM   1208  CE2 TRP A1014      46.525 122.394  23.362  1.00 16.09           C  
ANISOU 1208  CE2 TRP A1014     3047   2184    883    425   -111   -315       C  
ATOM   1209  CE3 TRP A1014      45.807 121.493  21.237  1.00 14.90           C  
ANISOU 1209  CE3 TRP A1014     2569   2289    803   -266    333   -287       C  
ATOM   1210  CZ2 TRP A1014      47.820 122.599  22.891  1.00 14.81           C  
ANISOU 1210  CZ2 TRP A1014     2678   2027    922    350     17   -509       C  
ATOM   1211  CZ3 TRP A1014      47.094 121.697  20.771  1.00 13.79           C  
ANISOU 1211  CZ3 TRP A1014     2281   2222    735   -271    -38    -27       C  
ATOM   1212  CH2 TRP A1014      48.085 122.244  21.596  1.00 14.04           C  
ANISOU 1212  CH2 TRP A1014     2584   2007    744    175    -42   -335       C  
ATOM   1213  N   ILE A1015      41.517 121.259  19.856  1.00 15.76           N  
ANISOU 1213  N   ILE A1015     2881   2111    998   -109    280   -560       N  
ATOM   1214  CA  ILE A1015      40.657 120.559  18.911  1.00 17.04           C  
ANISOU 1214  CA  ILE A1015     3005   2290   1178     87     94   -799       C  
ATOM   1215  C   ILE A1015      41.465 119.422  18.305  1.00 14.16           C  
ANISOU 1215  C   ILE A1015     2391   2038    950    -38    -65   -707       C  
ATOM   1216  O   ILE A1015      42.612 119.626  17.893  1.00 14.98           O  
ANISOU 1216  O   ILE A1015     2055   2184   1455    -88    605   -750       O  
ATOM   1217  CB  ILE A1015      40.168 121.506  17.800  1.00 15.25           C  
ANISOU 1217  CB  ILE A1015     2177   2242   1376    696   -508   -856       C  
ATOM   1218  CG1 ILE A1015      39.389 122.683  18.390  1.00 20.95           C  
ANISOU 1218  CG1 ILE A1015     3635   2529   1796   1102   -969     38       C  
ATOM   1219  CG2 ILE A1015      39.323 120.753  16.783  1.00 21.57           C  
ANISOU 1219  CG2 ILE A1015     3793   2544   1860    706   -238   -928       C  
ATOM   1220  CD1 ILE A1015      39.048 123.746  17.370  1.00 21.76           C  
ANISOU 1220  CD1 ILE A1015     3367   2887   2015    549  -1241   -123       C  
ATOM   1221  N   PHE A1016      40.872 118.233  18.246  1.00 15.13           N  
ANISOU 1221  N   PHE A1016     2780   2165    804     70   -105   -383       N  
ATOM   1222  CA  PHE A1016      41.502 117.094  17.589  1.00 15.41           C  
ANISOU 1222  CA  PHE A1016     3122   1945    790    111    -59    -81       C  
ATOM   1223  C   PHE A1016      41.048 117.045  16.135  1.00 14.72           C  
ANISOU 1223  C   PHE A1016     2463   2490    642      1   -176    -53       C  
ATOM   1224  O   PHE A1016      39.856 116.869  15.856  1.00 14.67           O  
ANISOU 1224  O   PHE A1016     2103   2744    725     43     20   -249       O  
ATOM   1225  CB  PHE A1016      41.158 115.788  18.302  1.00 16.44           C  
ANISOU 1225  CB  PHE A1016     3397   1961    887    -51    -52   -200       C  
ATOM   1226  CG  PHE A1016      41.761 114.572  17.656  1.00 15.01           C  
ANISOU 1226  CG  PHE A1016     2524   2182    999    357   -234    124       C  
ATOM   1227  CD1 PHE A1016      43.126 114.496  17.432  1.00 15.10           C  
ANISOU 1227  CD1 PHE A1016     2673   2169    894    940    221    206       C  
ATOM   1228  CD2 PHE A1016      40.966 113.503  17.276  1.00 16.51           C  
ANISOU 1228  CD2 PHE A1016     2900   2298   1075    322    -65    100       C  
ATOM   1229  CE1 PHE A1016      43.687 113.380  16.839  1.00 17.51           C  
ANISOU 1229  CE1 PHE A1016     3391   2230   1033    555    380    328       C  
ATOM   1230  CE2 PHE A1016      41.520 112.383  16.685  1.00 17.29           C  
ANISOU 1230  CE2 PHE A1016     2997   2349   1225    399    114    324       C  
ATOM   1231  CZ  PHE A1016      42.883 112.322  16.465  1.00 19.64           C  
ANISOU 1231  CZ  PHE A1016     3875   2406   1182    516     80    245       C  
ATOM   1232  N   VAL A1017      41.996 117.200  15.215  1.00 15.49           N  
ANISOU 1232  N   VAL A1017     2725   2401    760   -164    288   -142       N  
ATOM   1233  CA  VAL A1017      41.723 117.224  13.783  1.00 13.66           C  
ANISOU 1233  CA  VAL A1017     2328   2174    688   -272    238   -158       C  
ATOM   1234  C   VAL A1017      42.197 115.914  13.174  1.00 14.00           C  
ANISOU 1234  C   VAL A1017     2437   2198    682   -114    -42   -303       C  
ATOM   1235  O   VAL A1017      43.288 115.428  13.493  1.00 15.29           O  
ANISOU 1235  O   VAL A1017     2624   2473    712    205   -170    -71       O  
ATOM   1236  CB  VAL A1017      42.413 118.425  13.106  1.00 16.35           C  
ANISOU 1236  CB  VAL A1017     2847   2604    762   -193     87   -183       C  
ATOM   1237  CG1 VAL A1017      42.076 118.470  11.621  1.00 16.24           C  
ANISOU 1237  CG1 VAL A1017     2930   2336    906   -336    252   -403       C  
ATOM   1238  CG2 VAL A1017      42.015 119.723  13.790  1.00 18.57           C  
ANISOU 1238  CG2 VAL A1017     3244   2786   1024    -15   -417   -480       C  
ATOM   1239  N   THR A1018      41.374 115.341  12.299  1.00 14.58           N  
ANISOU 1239  N   THR A1018     2632   1923    985   -187     59   -361       N  
ATOM   1240  CA  THR A1018      41.744 114.148  11.551  1.00 14.52           C  
ANISOU 1240  CA  THR A1018     2627   2096    792    -35   -186   -301       C  
ATOM   1241  C   THR A1018      41.232 114.297  10.129  1.00 14.01           C  
ANISOU 1241  C   THR A1018     2269   2304    751    -39     40   -383       C  
ATOM   1242  O   THR A1018      40.052 114.590   9.918  1.00 14.32           O  
ANISOU 1242  O   THR A1018     2125   2397    920    128   -231   -186       O  
ATOM   1243  CB  THR A1018      41.152 112.885  12.183  1.00 15.42           C  
ANISOU 1243  CB  THR A1018     2521   1983   1356   -163   -140   -250       C  
ATOM   1244  OG1 THR A1018      41.456 112.861  13.582  1.00 16.98           O  
ANISOU 1244  OG1 THR A1018     3058   1992   1402   -324     72    222       O  
ATOM   1245  CG2 THR A1018      41.738 111.644  11.525  1.00 16.72           C  
ANISOU 1245  CG2 THR A1018     2490   2493   1369   -123   -231   -195       C  
ATOM   1246  N   ILE A1019      42.120 114.101   9.159  1.00 14.14           N  
ANISOU 1246  N   ILE A1019     2293   2311    767   -331     68   -348       N  
ATOM   1247  CA  ILE A1019      41.784 114.221   7.747  1.00 15.13           C  
ANISOU 1247  CA  ILE A1019     2488   2216   1044   -247    462   -264       C  
ATOM   1248  C   ILE A1019      42.201 112.933   7.055  1.00 14.22           C  
ANISOU 1248  C   ILE A1019     2087   2176   1139   -101    620   -338       C  
ATOM   1249  O   ILE A1019      43.370 112.537   7.129  1.00 15.84           O  
ANISOU 1249  O   ILE A1019     2860   2031   1128    241    333   -199       O  
ATOM   1250  CB  ILE A1019      42.466 115.434   7.097  1.00 15.76           C  
ANISOU 1250  CB  ILE A1019     2553   2116   1319    107    355   -179       C  
ATOM   1251  CG1 ILE A1019      42.045 116.720   7.812  1.00 17.36           C  
ANISOU 1251  CG1 ILE A1019     2978   2128   1490    247   -219   -366       C  
ATOM   1252  CG2 ILE A1019      42.122 115.503   5.618  1.00 15.77           C  
ANISOU 1252  CG2 ILE A1019     2585   1843   1565    140    653    -20       C  
ATOM   1253  CD1 ILE A1019      43.130 117.767   7.886  1.00 19.62           C  
ANISOU 1253  CD1 ILE A1019     3594   2284   1578     63   -238   -408       C  
ATOM   1254  N   THR A1020      41.250 112.277   6.395  1.00 13.67           N  
ANISOU 1254  N   THR A1020     2015   2213    967    139     86    -16       N  
ATOM   1255  CA  THR A1020      41.505 111.046   5.664  1.00 16.50           C  
ANISOU 1255  CA  THR A1020     3053   2426    791   -137    158   -114       C  
ATOM   1256  C   THR A1020      41.254 111.280   4.181  1.00 15.88           C  
ANISOU 1256  C   THR A1020     2913   2277    844   -296     35   -354       C  
ATOM   1257  O   THR A1020      40.420 112.105   3.798  1.00 15.38           O  
ANISOU 1257  O   THR A1020     2758   2217    870   -503   -217   -275       O  
ATOM   1258  CB  THR A1020      40.610 109.903   6.164  1.00 15.42           C  
ANISOU 1258  CB  THR A1020     2471   2480    908   -160    -73    235       C  
ATOM   1259  OG1 THR A1020      39.239 110.200   5.872  1.00 15.18           O  
ANISOU 1259  OG1 THR A1020     2275   2521    971   -319   -176    160       O  
ATOM   1260  CG2 THR A1020      40.774 109.716   7.665  1.00 14.67           C  
ANISOU 1260  CG2 THR A1020     2118   2550    905   -152   -291    208       C  
ATOM   1261  N   ASN A1021      41.987 110.546   3.346  1.00 14.04           N  
ANISOU 1261  N   ASN A1021     2434   2176    727     73     95   -408       N  
ATOM   1262  CA  ASN A1021      41.911 110.718   1.900  1.00 14.89           C  
ANISOU 1262  CA  ASN A1021     2673   2012    974   -321    104   -577       C  
ATOM   1263  C   ASN A1021      41.868 109.350   1.241  1.00 12.83           C  
ANISOU 1263  C   ASN A1021     2138   1994    743    -28   -171   -501       C  
ATOM   1264  O   ASN A1021      42.809 108.563   1.381  1.00 14.68           O  
ANISOU 1264  O   ASN A1021     2495   2194    890     -9     99    -62       O  
ATOM   1265  CB  ASN A1021      43.113 111.514   1.383  1.00 16.48           C  
ANISOU 1265  CB  ASN A1021     2845   2217   1200   -513    237   -635       C  
ATOM   1266  CG  ASN A1021      43.255 112.860   2.066  1.00 16.10           C  
ANISOU 1266  CG  ASN A1021     2744   2090   1283   -641    455   -723       C  
ATOM   1267  OD1 ASN A1021      42.666 113.851   1.637  1.00 18.77           O  
ANISOU 1267  OD1 ASN A1021     3565   2158   1410   -379    372   -650       O  
ATOM   1268  ND2 ASN A1021      44.038 112.900   3.138  1.00 14.93           N  
ANISOU 1268  ND2 ASN A1021     2362   2291   1019   -342    -22   -437       N  
ATOM   1269  N   ASN A1022      40.780 109.070   0.530  1.00 13.93           N  
ANISOU 1269  N   ASN A1022     2365   2109    817   -295    -16   -482       N  
ATOM   1270  CA  ASN A1022      40.646 107.872  -0.292  1.00 15.63           C  
ANISOU 1270  CA  ASN A1022     2641   2571    726    -55    118   -286       C  
ATOM   1271  C   ASN A1022      40.713 108.329  -1.743  1.00 16.64           C  
ANISOU 1271  C   ASN A1022     2777   2724    820   -415    160   -169       C  
ATOM   1272  O   ASN A1022      39.809 109.022  -2.223  1.00 17.02           O  
ANISOU 1272  O   ASN A1022     2402   3103    962   -455   -222   -379       O  
ATOM   1273  CB  ASN A1022      39.327 107.159   0.002  1.00 16.31           C  
ANISOU 1273  CB  ASN A1022     2842   2509    846   -442    -69   -284       C  
ATOM   1274  CG  ASN A1022      39.219 105.807  -0.689  1.00 17.56           C  
ANISOU 1274  CG  ASN A1022     3116   2553   1005   -617    145   -170       C  
ATOM   1275  OD1 ASN A1022      39.584 105.657  -1.855  1.00 19.21           O  
ANISOU 1275  OD1 ASN A1022     3750   2555    992   -480   -144    -46       O  
ATOM   1276  ND2 ASN A1022      38.715 104.814   0.035  1.00 23.35           N  
ANISOU 1276  ND2 ASN A1022     4714   2709   1449  -1010    632    -23       N  
ATOM   1277  N   ARG A1023      41.785 107.941  -2.439  1.00 14.97           N  
ANISOU 1277  N   ARG A1023     2184   2646    860   -606    309   -255       N  
ATOM   1278  CA  ARG A1023      41.999 108.407  -3.804  1.00 11.99           C  
ANISOU 1278  CA  ARG A1023     1356   2382    817   -766    205    -35       C  
ATOM   1279  C   ARG A1023      40.912 107.937  -4.761  1.00 14.59           C  
ANISOU 1279  C   ARG A1023     2247   2392    903   -693     -9   -222       C  
ATOM   1280  O   ARG A1023      40.745 108.532  -5.831  1.00 15.24           O  
ANISOU 1280  O   ARG A1023     2421   2445    923   -542     82    158       O  
ATOM   1281  CB  ARG A1023      43.374 107.965  -4.307  1.00 14.30           C  
ANISOU 1281  CB  ARG A1023     1796   2361   1279   -405    284   -160       C  
ATOM   1282  CG  ARG A1023      44.536 108.476  -3.469  1.00 16.53           C  
ANISOU 1282  CG  ARG A1023     2288   2359   1632   -534   -123   -364       C  
ATOM   1283  CD  ARG A1023      44.502 109.991  -3.331  1.00 14.37           C  
ANISOU 1283  CD  ARG A1023     1488   2349   1624   -298     36   -439       C  
ATOM   1284  NE  ARG A1023      44.282 110.649  -4.615  1.00 15.15           N  
ANISOU 1284  NE  ARG A1023     2192   2354   1209   -514    117     37       N  
ATOM   1285  CZ  ARG A1023      45.240 110.909  -5.498  1.00 17.46           C  
ANISOU 1285  CZ  ARG A1023     2573   2489   1572   -694    333    -57       C  
ATOM   1286  NH1 ARG A1023      46.496 110.569  -5.239  1.00 17.54           N  
ANISOU 1286  NH1 ARG A1023     2629   2500   1536   -345    104   -235       N  
ATOM   1287  NH2 ARG A1023      44.941 111.509  -6.643  1.00 16.92           N  
ANISOU 1287  NH2 ARG A1023     2593   2707   1130   -445   -304    -66       N  
ATOM   1288  N   LEU A1024      40.173 106.889  -4.407  1.00 14.52           N  
ANISOU 1288  N   LEU A1024     2023   2287   1206   -486   -320   -418       N  
ATOM   1289  CA  LEU A1024      39.080 106.393  -5.229  1.00 16.27           C  
ANISOU 1289  CA  LEU A1024     2769   2102   1311   -214   -233   -449       C  
ATOM   1290  C   LEU A1024      37.721 106.914  -4.786  1.00 17.43           C  
ANISOU 1290  C   LEU A1024     2916   2340   1364   -266   -320   -383       C  
ATOM   1291  O   LEU A1024      36.705 106.531  -5.376  1.00 17.51           O  
ANISOU 1291  O   LEU A1024     2841   2463   1349    -84    -89   -209       O  
ATOM   1292  CB  LEU A1024      39.071 104.859  -5.239  1.00 17.74           C  
ANISOU 1292  CB  LEU A1024     3612   1756   1373    -39   -595   -484       C  
ATOM   1293  CG  LEU A1024      40.376 104.164  -5.633  1.00 21.01           C  
ANISOU 1293  CG  LEU A1024     4148   2013   1820    524    -54   -262       C  
ATOM   1294  CD1 LEU A1024      40.184 102.656  -5.694  1.00 18.18           C  
ANISOU 1294  CD1 LEU A1024     3275   1860   1773    157   -321   -948       C  
ATOM   1295  CD2 LEU A1024      40.895 104.694  -6.958  1.00 20.70           C  
ANISOU 1295  CD2 LEU A1024     3861   2122   1881    678    759    243       C  
ATOM   1296  N   ASN A1025      37.675 107.773  -3.767  1.00 18.88           N  
ANISOU 1296  N   ASN A1025     3084   2686   1402     29    424   -606       N  
ATOM   1297  CA  ASN A1025      36.398 108.271  -3.271  1.00 19.85           C  
ANISOU 1297  CA  ASN A1025     3275   2776   1493    -47    530   -802       C  
ATOM   1298  C   ASN A1025      36.499 109.702  -2.752  1.00 18.94           C  
ANISOU 1298  C   ASN A1025     2579   2887   1729     85    -29   -870       C  
ATOM   1299  O   ASN A1025      36.543 110.650  -3.542  1.00 21.28           O  
ANISOU 1299  O   ASN A1025     3480   2768   1837   -145    -48   -738       O  
ATOM   1300  CB  ASN A1025      35.837 107.340  -2.192  1.00 24.34           C  
ANISOU 1300  CB  ASN A1025     3355   3569   2323   -107   1225   -242       C  
ATOM   1301  CG  ASN A1025      34.374 107.610  -1.893  1.00 33.03           C  
ANISOU 1301  CG  ASN A1025     5242   4355   2954   -266    832    377       C  
ATOM   1302  OD1 ASN A1025      33.692 108.307  -2.646  1.00 35.94           O  
ANISOU 1302  OD1 ASN A1025     5558   4752   3346    -18    706    421       O  
ATOM   1303  ND2 ASN A1025      33.883 107.055  -0.791  1.00 35.93           N  
ANISOU 1303  ND2 ASN A1025     5922   4700   3032   -337    836    607       N  
ATOM   1304  N   ASN A1026      36.541 109.873  -1.432  1.00 20.33           N  
ANISOU 1304  N   ASN A1026     2744   3182   1801    140    -63   -885       N  
ATOM   1305  CA  ASN A1026      36.351 111.180  -0.823  1.00 17.89           C  
ANISOU 1305  CA  ASN A1026     1998   3061   1741    -86   -288  -1032       C  
ATOM   1306  C   ASN A1026      37.483 111.516   0.138  1.00 19.09           C  
ANISOU 1306  C   ASN A1026     3028   2743   1481    171    115   -756       C  
ATOM   1307  O   ASN A1026      38.212 110.643   0.617  1.00 17.28           O  
ANISOU 1307  O   ASN A1026     2557   2664   1345   -251    337   -744       O  
ATOM   1308  CB  ASN A1026      35.037 111.240  -0.022  1.00 20.53           C  
ANISOU 1308  CB  ASN A1026     1579   3663   2558    291   -118  -1085       C  
ATOM   1309  CG  ASN A1026      33.816 110.928  -0.865  1.00 26.60           C  
ANISOU 1309  CG  ASN A1026     2567   4232   3310    171    140   -731       C  
ATOM   1310  OD1 ASN A1026      33.783 111.199  -2.063  1.00 30.41           O  
ANISOU 1310  OD1 ASN A1026     3566   4348   3640     54      1   -290       O  
ATOM   1311  ND2 ASN A1026      32.794 110.360  -0.231  1.00 34.24           N  
ANISOU 1311  ND2 ASN A1026     4491   4601   3920    -25    628   -526       N  
ATOM   1312  N   SER A1027      37.618 112.813   0.399  1.00 16.70           N  
ANISOU 1312  N   SER A1027     2759   2585   1000   -124   -116   -625       N  
ATOM   1313  CA ASER A1027      38.450 113.325   1.478  0.54 14.86           C  
ANISOU 1313  CA ASER A1027     2254   2435    956   -327     77   -366       C  
ATOM   1314  CA BSER A1027      38.449 113.326   1.479  0.46 14.86           C  
ANISOU 1314  CA BSER A1027     2246   2598    804   -230     66   -359       C  
ATOM   1315  C   SER A1027      37.531 113.769   2.608  1.00 18.23           C  
ANISOU 1315  C   SER A1027     3353   2550   1025     75    378   -217       C  
ATOM   1316  O   SER A1027      36.522 114.438   2.365  1.00 18.26           O  
ANISOU 1316  O   SER A1027     2863   3047   1027    290   -424     45       O  
ATOM   1317  CB ASER A1027      39.290 114.510   1.000  0.54 16.36           C  
ANISOU 1317  CB ASER A1027     2736   2376   1106   -505     43   -310       C  
ATOM   1318  CB BSER A1027      39.290 114.513   1.009  0.46 16.28           C  
ANISOU 1318  CB BSER A1027     2583   2827    776   -261     63   -213       C  
ATOM   1319  OG ASER A1027      40.073 115.042   2.054  0.54 17.13           O  
ANISOU 1319  OG ASER A1027     2835   2438   1237   -527    295     47       O  
ATOM   1320  OG BSER A1027      40.393 114.089   0.229  0.46 16.86           O  
ANISOU 1320  OG BSER A1027     2577   2936    894   -192    479    115       O  
ATOM   1321  N   LYS A1028      37.873 113.391   3.836  1.00 16.46           N  
ANISOU 1321  N   LYS A1028     2644   2728    884   -161    100   -276       N  
ATOM   1322  CA  LYS A1028      37.026 113.666   4.987  1.00 16.22           C  
ANISOU 1322  CA  LYS A1028     2565   2661    936   -185    172   -596       C  
ATOM   1323  C   LYS A1028      37.819 114.394   6.059  1.00 15.87           C  
ANISOU 1323  C   LYS A1028     2363   2530   1136    227    703   -465       C  
ATOM   1324  O   LYS A1028      38.991 114.086   6.291  1.00 16.63           O  
ANISOU 1324  O   LYS A1028     2228   2848   1245    253    149   -321       O  
ATOM   1325  CB  LYS A1028      36.471 112.362   5.567  1.00 18.79           C  
ANISOU 1325  CB  LYS A1028     3339   2682   1117   -330     81   -475       C  
ATOM   1326  CG  LYS A1028      35.726 111.508   4.558  1.00 17.89           C  
ANISOU 1326  CG  LYS A1028     2938   2617   1241   -933     16   -609       C  
ATOM   1327  CD  LYS A1028      35.218 110.220   5.180  1.00 22.42           C  
ANISOU 1327  CD  LYS A1028     3636   3095   1789  -1019     85   -540       C  
ATOM   1328  CE  LYS A1028      34.467 109.382   4.159  1.00 26.48           C  
ANISOU 1328  CE  LYS A1028     4349   3290   2422  -1181   -159   -300       C  
ATOM   1329  NZ  LYS A1028      33.905 108.144   4.763  1.00 26.94           N  
ANISOU 1329  NZ  LYS A1028     3873   3531   2832   -843    344    -79       N  
ATOM   1330  N   ILE A1029      37.174 115.355   6.715  1.00 16.13           N  
ANISOU 1330  N   ILE A1029     2448   2792    889   -337     18   -485       N  
ATOM   1331  CA  ILE A1029      37.758 116.071   7.842  1.00 16.08           C  
ANISOU 1331  CA  ILE A1029     2545   2729    838    -14     41   -498       C  
ATOM   1332  C   ILE A1029      36.941 115.761   9.089  1.00 15.22           C  
ANISOU 1332  C   ILE A1029     1834   2835   1115    154    205   -320       C  
ATOM   1333  O   ILE A1029      35.708 115.864   9.075  1.00 16.45           O  
ANISOU 1333  O   ILE A1029     2309   2930   1013    212     49    -95       O  
ATOM   1334  CB  ILE A1029      37.859 117.588   7.586  1.00 17.94           C  
ANISOU 1334  CB  ILE A1029     3172   2493   1150    330   -705   -355       C  
ATOM   1335  CG1 ILE A1029      38.414 118.302   8.822  1.00 19.56           C  
ANISOU 1335  CG1 ILE A1029     3779   2280   1372   -182   -477   -148       C  
ATOM   1336  CG2 ILE A1029      36.513 118.169   7.164  1.00 21.48           C  
ANISOU 1336  CG2 ILE A1029     3662   2831   1668    313    -64   -258       C  
ATOM   1337  CD1 ILE A1029      38.760 119.755   8.588  1.00 21.20           C  
ANISOU 1337  CD1 ILE A1029     4414   2270   1371   -776   -397   -274       C  
ATOM   1338  N   TYR A1030      37.627 115.362  10.156  1.00 16.02           N  
ANISOU 1338  N   TYR A1030     2753   2609    726    -83    198    -85       N  
ATOM   1339  CA  TYR A1030      37.006 115.026  11.426  1.00 15.42           C  
ANISOU 1339  CA  TYR A1030     2647   2482    730    126   -145   -252       C  
ATOM   1340  C   TYR A1030      37.428 116.039  12.481  1.00 14.71           C  
ANISOU 1340  C   TYR A1030     2255   2459    874    108    287   -490       C  
ATOM   1341  O   TYR A1030      38.561 116.530  12.476  1.00 16.00           O  
ANISOU 1341  O   TYR A1030     2326   2648   1107   -214    363   -262       O  
ATOM   1342  CB  TYR A1030      37.425 113.624  11.887  1.00 16.09           C  
ANISOU 1342  CB  TYR A1030     3009   2310    793   -112     76   -190       C  
ATOM   1343  CG  TYR A1030      36.944 112.491  11.001  1.00 16.40           C  
ANISOU 1343  CG  TYR A1030     2530   2607   1093   -265    115   -158       C  
ATOM   1344  CD1 TYR A1030      35.911 111.655  11.408  1.00 18.03           C  
ANISOU 1344  CD1 TYR A1030     3045   2658   1148   -617    301   -387       C  
ATOM   1345  CD2 TYR A1030      37.529 112.252   9.764  1.00 16.87           C  
ANISOU 1345  CD2 TYR A1030     2651   2865    896   -168   -365   -300       C  
ATOM   1346  CE1 TYR A1030      35.472 110.615  10.605  1.00 17.97           C  
ANISOU 1346  CE1 TYR A1030     2690   3007   1130   -599     85   -454       C  
ATOM   1347  CE2 TYR A1030      37.096 111.218   8.954  1.00 17.36           C  
ANISOU 1347  CE2 TYR A1030     2497   2927   1171   -122     -3   -392       C  
ATOM   1348  CZ  TYR A1030      36.069 110.402   9.380  1.00 18.29           C  
ANISOU 1348  CZ  TYR A1030     2629   3100   1221   -814   -167   -506       C  
ATOM   1349  OH  TYR A1030      35.638 109.371   8.576  1.00 21.32           O  
ANISOU 1349  OH  TYR A1030     3093   3273   1733  -1271     64   -556       O  
ATOM   1350  N   ILE A1031      36.505 116.351  13.387  1.00 14.85           N  
ANISOU 1350  N   ILE A1031     2049   2487   1106    434    176   -596       N  
ATOM   1351  CA  ILE A1031      36.758 117.270  14.491  1.00 15.47           C  
ANISOU 1351  CA  ILE A1031     2087   2684   1107    216    420   -336       C  
ATOM   1352  C   ILE A1031      36.343 116.580  15.781  1.00 14.95           C  
ANISOU 1352  C   ILE A1031     1884   2662   1136    327    236   -335       C  
ATOM   1353  O   ILE A1031      35.171 116.218  15.944  1.00 16.91           O  
ANISOU 1353  O   ILE A1031     2485   2810   1131   -116     26     43       O  
ATOM   1354  CB  ILE A1031      36.011 118.602  14.323  1.00 16.94           C  
ANISOU 1354  CB  ILE A1031     2170   2856   1410    -39    292   -256       C  
ATOM   1355  CG1 ILE A1031      36.570 119.376  13.127  1.00 18.01           C  
ANISOU 1355  CG1 ILE A1031     2316   3001   1527    -31    133    -40       C  
ATOM   1356  CG2 ILE A1031      36.109 119.431  15.595  1.00 18.73           C  
ANISOU 1356  CG2 ILE A1031     2732   2925   1461   -288    432   -302       C  
ATOM   1357  CD1 ILE A1031      38.034 119.729  13.261  1.00 16.80           C  
ANISOU 1357  CD1 ILE A1031     1918   3036   1430    122    -50   -105       C  
ATOM   1358  N   ASN A1032      37.300 116.402  16.693  1.00 16.74           N  
ANISOU 1358  N   ASN A1032     2588   2652   1122    122    -28   -340       N  
ATOM   1359  CA  ASN A1032      37.065 115.695  17.952  1.00 17.47           C  
ANISOU 1359  CA  ASN A1032     2954   2498   1186   -473     53   -414       C  
ATOM   1360  C   ASN A1032      36.468 114.312  17.710  1.00 18.61           C  
ANISOU 1360  C   ASN A1032     3134   2469   1467   -725    363    -95       C  
ATOM   1361  O   ASN A1032      35.649 113.815  18.486  1.00 21.65           O  
ANISOU 1361  O   ASN A1032     3714   2555   1957  -1151    917   -212       O  
ATOM   1362  CB  ASN A1032      36.224 116.522  18.926  1.00 17.42           C  
ANISOU 1362  CB  ASN A1032     2738   2757   1124   -439    193   -323       C  
ATOM   1363  CG  ASN A1032      36.928 117.786  19.365  1.00 18.84           C  
ANISOU 1363  CG  ASN A1032     3166   2996    996   -259    -10   -295       C  
ATOM   1364  OD1 ASN A1032      38.157 117.839  19.414  1.00 19.43           O  
ANISOU 1364  OD1 ASN A1032     3324   3050   1009    -86    295   -202       O  
ATOM   1365  ND2 ASN A1032      36.154 118.817  19.682  1.00 20.25           N  
ANISOU 1365  ND2 ASN A1032     3436   2995   1262    243    738   -436       N  
ATOM   1366  N   GLY A1033      36.877 113.693  16.608  1.00 17.20           N  
ANISOU 1366  N   GLY A1033     2614   2364   1559   -665   -127   -355       N  
ATOM   1367  CA  GLY A1033      36.451 112.349  16.303  1.00 18.56           C  
ANISOU 1367  CA  GLY A1033     2696   2567   1790   -806    582   -252       C  
ATOM   1368  C   GLY A1033      35.141 112.225  15.560  1.00 19.24           C  
ANISOU 1368  C   GLY A1033     2556   2721   2035   -776    167   -125       C  
ATOM   1369  O   GLY A1033      34.651 111.102  15.396  1.00 23.82           O  
ANISOU 1369  O   GLY A1033     3896   2693   2461   -235      0     17       O  
ATOM   1370  N   ARG A1034      34.559 113.328  15.093  1.00 19.35           N  
ANISOU 1370  N   ARG A1034     2216   3289   1849   -280     18    -80       N  
ATOM   1371  CA  ARG A1034      33.286 113.297  14.385  1.00 21.03           C  
ANISOU 1371  CA  ARG A1034     2495   3704   1793   -665     10   -227       C  
ATOM   1372  C   ARG A1034      33.448 113.868  12.985  1.00 20.29           C  
ANISOU 1372  C   ARG A1034     2795   3538   1375   -715    497   -398       C  
ATOM   1373  O   ARG A1034      34.059 114.928  12.806  1.00 20.11           O  
ANISOU 1373  O   ARG A1034     2959   3102   1581   -814     58   -475       O  
ATOM   1374  CB  ARG A1034      32.205 114.064  15.149  1.00 23.67           C  
ANISOU 1374  CB  ARG A1034     2876   4203   1913   -375    182   -333       C  
ATOM   1375  CG  ARG A1034      31.831 113.398  16.449  1.00 31.08           C  
ANISOU 1375  CG  ARG A1034     4697   4700   2411   -406    648   -593       C  
ATOM   1376  CD  ARG A1034      30.943 114.270  17.302  1.00 39.47           C  
ANISOU 1376  CD  ARG A1034     6863   5168   2967     17    846   -620       C  
ATOM   1377  NE  ARG A1034      31.156 113.971  18.711  1.00 46.52           N  
ANISOU 1377  NE  ARG A1034     8915   5472   3289    570   1015   -605       N  
ATOM   1378  CZ  ARG A1034      30.489 114.533  19.709  1.00 53.25           C  
ANISOU 1378  CZ  ARG A1034    10822   5685   3727    906    841   -482       C  
ATOM   1379  NH1 ARG A1034      29.544 115.431  19.464  1.00 55.84           N  
ANISOU 1379  NH1 ARG A1034    11508   5823   3885   1005    796   -361       N  
ATOM   1380  NH2 ARG A1034      30.768 114.190  20.956  1.00 55.11           N  
ANISOU 1380  NH2 ARG A1034    11274   5669   3995    940    566   -407       N  
ATOM   1381  N   LEU A1035      32.893 113.162  12.003  1.00 21.09           N  
ANISOU 1381  N   LEU A1035     3111   3475   1428   -272     69  -1031       N  
ATOM   1382  CA  LEU A1035      32.953 113.609  10.620  1.00 21.93           C  
ANISOU 1382  CA  LEU A1035     3011   3756   1566   -494   -521   -877       C  
ATOM   1383  C   LEU A1035      32.214 114.929  10.462  1.00 20.93           C  
ANISOU 1383  C   LEU A1035     2168   3875   1910   -106   -186   -858       C  
ATOM   1384  O   LEU A1035      31.049 115.055  10.853  1.00 22.39           O  
ANISOU 1384  O   LEU A1035     2162   3840   2504    -61    186   -667       O  
ATOM   1385  CB  LEU A1035      32.320 112.552   9.716  1.00 24.28           C  
ANISOU 1385  CB  LEU A1035     3622   3995   1607   -814   -322   -878       C  
ATOM   1386  CG  LEU A1035      32.290 112.893   8.228  1.00 24.98           C  
ANISOU 1386  CG  LEU A1035     3474   4301   1717  -1050   -222   -909       C  
ATOM   1387  CD1 LEU A1035      33.702 113.119   7.725  1.00 25.07           C  
ANISOU 1387  CD1 LEU A1035     3418   4336   1771   -973   -122   -832       C  
ATOM   1388  CD2 LEU A1035      31.603 111.793   7.436  1.00 27.65           C  
ANISOU 1388  CD2 LEU A1035     4194   4478   1834   -816   -246  -1115       C  
ATOM   1389  N   ILE A1036      32.895 115.913   9.886  1.00 21.75           N  
ANISOU 1389  N   ILE A1036     2719   3912   1634    164   -196   -539       N  
ATOM   1390  CA  ILE A1036      32.345 117.247   9.682  1.00 24.31           C  
ANISOU 1390  CA  ILE A1036     3485   4221   1530    493   -299   -640       C  
ATOM   1391  C   ILE A1036      31.980 117.486   8.221  1.00 24.33           C  
ANISOU 1391  C   ILE A1036     3471   4311   1463   1122   -417   -635       C  
ATOM   1392  O   ILE A1036      30.878 117.941   7.913  1.00 26.39           O  
ANISOU 1392  O   ILE A1036     3916   4490   1621   1286   -692   -490       O  
ATOM   1393  CB  ILE A1036      33.301 118.338  10.213  1.00 27.87           C  
ANISOU 1393  CB  ILE A1036     4504   4329   1758    317   -429   -767       C  
ATOM   1394  CG1 ILE A1036      33.423 118.238  11.733  1.00 27.07           C  
ANISOU 1394  CG1 ILE A1036     4095   4522   1667    145   -356   -883       C  
ATOM   1395  CG2 ILE A1036      32.821 119.721   9.798  1.00 27.80           C  
ANISOU 1395  CG2 ILE A1036     4610   4310   1645    413   -404   -689       C  
ATOM   1396  CD1 ILE A1036      32.108 118.403  12.464  1.00 27.55           C  
ANISOU 1396  CD1 ILE A1036     4054   4654   1761    428   -299   -942       C  
ATOM   1397  N   ASP A1037      32.895 117.180   7.306  1.00 23.23           N  
ANISOU 1397  N   ASP A1037     3059   4266   1501    953    220   -697       N  
ATOM   1398  CA  ASP A1037      32.659 117.436   5.896  1.00 24.97           C  
ANISOU 1398  CA  ASP A1037     3631   4371   1487   1019    174   -634       C  
ATOM   1399  C   ASP A1037      33.431 116.420   5.070  1.00 21.74           C  
ANISOU 1399  C   ASP A1037     2723   4221   1316    692     12   -667       C  
ATOM   1400  O   ASP A1037      34.490 115.939   5.482  1.00 22.91           O  
ANISOU 1400  O   ASP A1037     2631   4480   1595    875   -451   -726       O  
ATOM   1401  CB  ASP A1037      33.087 118.859   5.516  1.00 29.83           C  
ANISOU 1401  CB  ASP A1037     4804   4828   1703   1681   -150   -457       C  
ATOM   1402  CG  ASP A1037      32.672 119.238   4.111  1.00 38.71           C  
ANISOU 1402  CG  ASP A1037     7051   5561   2096   1637   -477   -331       C  
ATOM   1403  OD1 ASP A1037      31.567 118.835   3.688  1.00 39.32           O  
ANISOU 1403  OD1 ASP A1037     6833   5881   2225   1508   -983   -276       O  
ATOM   1404  OD2 ASP A1037      33.449 119.939   3.430  1.00 42.21           O  
ANISOU 1404  OD2 ASP A1037     7980   5777   2283   1815   -309   -266       O  
ATOM   1405  N   GLN A1038      32.884 116.092   3.902  1.00 20.75           N  
ANISOU 1405  N   GLN A1038     2615   4138   1131    539   -176   -320       N  
ATOM   1406  CA  GLN A1038      33.541 115.197   2.963  1.00 20.23           C  
ANISOU 1406  CA  GLN A1038     2402   4139   1145    287    -25     42       C  
ATOM   1407  C   GLN A1038      33.248 115.657   1.544  1.00 19.30           C  
ANISOU 1407  C   GLN A1038     2342   3957   1033    224    -43    280       C  
ATOM   1408  O   GLN A1038      32.137 116.102   1.244  1.00 21.96           O  
ANISOU 1408  O   GLN A1038     2628   4526   1188    326   -155    246       O  
ATOM   1409  CB  GLN A1038      33.096 113.740   3.155  1.00 25.57           C  
ANISOU 1409  CB  GLN A1038     3767   4100   1847    -22    309     72       C  
ATOM   1410  CG  GLN A1038      31.598 113.514   3.051  1.00 28.56           C  
ANISOU 1410  CG  GLN A1038     4069   4255   2528   -346    282    -41       C  
ATOM   1411  CD  GLN A1038      31.220 112.057   3.231  1.00 34.68           C  
ANISOU 1411  CD  GLN A1038     5298   4735   3143   -428    485   -315       C  
ATOM   1412  OE1 GLN A1038      31.890 111.162   2.716  1.00 37.26           O  
ANISOU 1412  OE1 GLN A1038     5873   4891   3394   -200    304   -532       O  
ATOM   1413  NE2 GLN A1038      30.142 111.811   3.967  1.00 38.67           N  
ANISOU 1413  NE2 GLN A1038     6228   5052   3412   -554    897    -77       N  
ATOM   1414  N   LYS A1039      34.254 115.557   0.681  1.00 18.41           N  
ANISOU 1414  N   LYS A1039     2415   3636    942    378     59     95       N  
ATOM   1415  CA  LYS A1039      34.156 115.975  -0.708  1.00 17.80           C  
ANISOU 1415  CA  LYS A1039     2487   3180   1097    332    145    -69       C  
ATOM   1416  C   LYS A1039      34.851 114.942  -1.583  1.00 16.92           C  
ANISOU 1416  C   LYS A1039     2233   3015   1183    593   -584   -227       C  
ATOM   1417  O   LYS A1039      35.856 114.352  -1.171  1.00 18.23           O  
ANISOU 1417  O   LYS A1039     2497   2978   1451     84   -223   -164       O  
ATOM   1418  CB  LYS A1039      34.820 117.343  -0.928  1.00 19.83           C  
ANISOU 1418  CB  LYS A1039     3120   2823   1590    163    505    -21       C  
ATOM   1419  CG  LYS A1039      34.142 118.493  -0.201  1.00 21.53           C  
ANISOU 1419  CG  LYS A1039     3094   2805   2280    270    621   -129       C  
ATOM   1420  CD  LYS A1039      32.717 118.691  -0.690  1.00 25.37           C  
ANISOU 1420  CD  LYS A1039     3762   3062   2814    703    426   -163       C  
ATOM   1421  CE  LYS A1039      32.020 119.799   0.082  1.00 30.11           C  
ANISOU 1421  CE  LYS A1039     4611   3354   3474   1231    300   -208       C  
ATOM   1422  NZ  LYS A1039      30.632 120.028  -0.407  1.00 33.61           N  
ANISOU 1422  NZ  LYS A1039     5199   3720   3850   1040    908   -307       N  
ATOM   1423  N   PRO A1040      34.339 114.707  -2.790  1.00 18.58           N  
ANISOU 1423  N   PRO A1040     2730   3206   1124    710   -550   -223       N  
ATOM   1424  CA  PRO A1040      34.981 113.730  -3.678  1.00 18.42           C  
ANISOU 1424  CA  PRO A1040     2895   3031   1072    880   -228   -430       C  
ATOM   1425  C   PRO A1040      36.301 114.258  -4.217  1.00 18.42           C  
ANISOU 1425  C   PRO A1040     2888   2895   1214    535     87    -51       C  
ATOM   1426  O   PRO A1040      36.454 115.453  -4.481  1.00 18.08           O  
ANISOU 1426  O   PRO A1040     2866   2618   1386    740   -202    323       O  
ATOM   1427  CB  PRO A1040      33.955 113.551  -4.803  1.00 21.39           C  
ANISOU 1427  CB  PRO A1040     3459   3256   1413   1214   -705   -223       C  
ATOM   1428  CG  PRO A1040      33.197 114.837  -4.820  1.00 21.17           C  
ANISOU 1428  CG  PRO A1040     3401   3208   1436    654   -939   -204       C  
ATOM   1429  CD  PRO A1040      33.126 115.290  -3.387  1.00 20.21           C  
ANISOU 1429  CD  PRO A1040     3167   3182   1328    667   -825   -132       C  
ATOM   1430  N   ILE A1041      37.264 113.349  -4.376  1.00 18.16           N  
ANISOU 1430  N   ILE A1041     2964   2839   1097    631   -268    -52       N  
ATOM   1431  CA  ILE A1041      38.584 113.702  -4.889  1.00 15.76           C  
ANISOU 1431  CA  ILE A1041     2264   2676   1048     47     44     14       C  
ATOM   1432  C   ILE A1041      38.989 112.736  -5.995  1.00 15.15           C  
ANISOU 1432  C   ILE A1041     2191   2379   1188   -464   -642    -98       C  
ATOM   1433  O   ILE A1041      40.136 112.752  -6.456  1.00 15.87           O  
ANISOU 1433  O   ILE A1041     2249   2524   1257   -433   -229    128       O  
ATOM   1434  CB  ILE A1041      39.643 113.716  -3.772  1.00 15.55           C  
ANISOU 1434  CB  ILE A1041     2755   2228    926     70   -341    126       C  
ATOM   1435  CG1 ILE A1041      39.766 112.326  -3.143  1.00 13.88           C  
ANISOU 1435  CG1 ILE A1041     2039   2382    853    134   -111    359       C  
ATOM   1436  CG2 ILE A1041      39.312 114.773  -2.727  1.00 16.81           C  
ANISOU 1436  CG2 ILE A1041     3261   2197    928    -40   -286   -130       C  
ATOM   1437  CD1 ILE A1041      40.985 112.154  -2.266  1.00 13.66           C  
ANISOU 1437  CD1 ILE A1041     2221   2349    621     47   -128    -15       C  
ATOM   1438  N   SER A1042      38.054 111.888  -6.427  1.00 16.16           N  
ANISOU 1438  N   SER A1042     2374   2579   1187    189   -476   -164       N  
ATOM   1439  CA  SER A1042      38.380 110.867  -7.418  1.00 16.55           C  
ANISOU 1439  CA  SER A1042     2373   2613   1302   -640   -221    -27       C  
ATOM   1440  C   SER A1042      38.753 111.458  -8.773  1.00 19.29           C  
ANISOU 1440  C   SER A1042     3676   2606   1047   -307   -329   -280       C  
ATOM   1441  O   SER A1042      39.383 110.768  -9.581  1.00 19.88           O  
ANISOU 1441  O   SER A1042     3696   2669   1187   -377   -377   -100       O  
ATOM   1442  CB  SER A1042      37.226 109.873  -7.562  1.00 21.31           C  
ANISOU 1442  CB  SER A1042     2592   3362   2145   -520   -695    158       C  
ATOM   1443  OG  SER A1042      36.018 110.536  -7.887  1.00 27.00           O  
ANISOU 1443  OG  SER A1042     3503   3942   2814  -1363  -1307    584       O  
ATOM   1444  N   ASN A1043      38.387 112.713  -9.039  1.00 18.43           N  
ANISOU 1444  N   ASN A1043     3292   2700   1008     63    -30   -154       N  
ATOM   1445  CA  ASN A1043      38.758 113.350 -10.296  1.00 18.01           C  
ANISOU 1445  CA  ASN A1043     2634   2914   1296    -93   -250    -89       C  
ATOM   1446  C   ASN A1043      40.211 113.804 -10.322  1.00 18.45           C  
ANISOU 1446  C   ASN A1043     3060   2913   1037    -65   -506   -107       C  
ATOM   1447  O   ASN A1043      40.746 114.060 -11.407  1.00 19.98           O  
ANISOU 1447  O   ASN A1043     3500   3088   1005   -250   -238    -35       O  
ATOM   1448  CB  ASN A1043      37.836 114.537 -10.586  1.00 21.63           C  
ANISOU 1448  CB  ASN A1043     3462   3090   1667    135   -156   -210       C  
ATOM   1449  CG  ASN A1043      37.873 115.584  -9.491  1.00 25.25           C  
ANISOU 1449  CG  ASN A1043     3751   3353   2491    114   -649   -282       C  
ATOM   1450  OD1 ASN A1043      37.856 115.258  -8.304  1.00 28.11           O  
ANISOU 1450  OD1 ASN A1043     4701   3409   2570    358   -835   -532       O  
ATOM   1451  ND2 ASN A1043      37.928 116.851  -9.886  1.00 29.23           N  
ANISOU 1451  ND2 ASN A1043     4069   3869   3169   -389   -324     23       N  
ATOM   1452  N   LEU A1044      40.858 113.915  -9.164  1.00 15.78           N  
ANISOU 1452  N   LEU A1044     2392   2547   1056   -231   -349   -178       N  
ATOM   1453  CA  LEU A1044      42.262 114.295  -9.127  1.00 15.36           C  
ANISOU 1453  CA  LEU A1044     2361   2504    971   -289   -170   -288       C  
ATOM   1454  C   LEU A1044      43.133 113.169  -9.669  1.00 15.77           C  
ANISOU 1454  C   LEU A1044     2679   2291   1023   -358    211   -257       C  
ATOM   1455  O   LEU A1044      42.841 111.984  -9.490  1.00 18.01           O  
ANISOU 1455  O   LEU A1044     3512   2204   1126   -607     83     49       O  
ATOM   1456  CB  LEU A1044      42.692 114.631  -7.697  1.00 16.31           C  
ANISOU 1456  CB  LEU A1044     2627   2529   1041   -153   -321    -16       C  
ATOM   1457  CG  LEU A1044      42.412 116.043  -7.172  1.00 17.44           C  
ANISOU 1457  CG  LEU A1044     2858   2683   1085   -525   -594    -38       C  
ATOM   1458  CD1 LEU A1044      40.927 116.266  -6.922  1.00 16.90           C  
ANISOU 1458  CD1 LEU A1044     2407   2710   1306   -609   -111    -74       C  
ATOM   1459  CD2 LEU A1044      43.221 116.318  -5.910  1.00 18.99           C  
ANISOU 1459  CD2 LEU A1044     3265   2948   1000   -232   -551    -14       C  
ATOM   1460  N   GLY A1045      44.214 113.552 -10.342  1.00 15.14           N  
ANISOU 1460  N   GLY A1045     2178   2470   1104   -104    246   -232       N  
ATOM   1461  CA  GLY A1045      45.124 112.586 -10.923  1.00 15.29           C  
ANISOU 1461  CA  GLY A1045     1992   2718   1098    -28      7     92       C  
ATOM   1462  C   GLY A1045      46.300 112.265 -10.025  1.00 17.36           C  
ANISOU 1462  C   GLY A1045     2507   2966   1122   -622    172    -82       C  
ATOM   1463  O   GLY A1045      46.119 111.832  -8.883  1.00 19.15           O  
ANISOU 1463  O   GLY A1045     2672   3395   1209    -90     98    251       O  
ATOM   1464  N   ASN A1046      47.513 112.475 -10.529  1.00 16.45           N  
ANISOU 1464  N   ASN A1046     2443   2944    862   -458     13   -319       N  
ATOM   1465  CA  ASN A1046      48.712 112.198  -9.753  1.00 16.38           C  
ANISOU 1465  CA  ASN A1046     2461   2782    980   -526     39   -552       C  
ATOM   1466  C   ASN A1046      48.995 113.357  -8.808  1.00 16.92           C  
ANISOU 1466  C   ASN A1046     2679   2731   1020   -853    262   -436       C  
ATOM   1467  O   ASN A1046      49.089 114.511  -9.235  1.00 20.22           O  
ANISOU 1467  O   ASN A1046     4060   2368   1254  -1038    244   -355       O  
ATOM   1468  CB  ASN A1046      49.908 111.992 -10.680  1.00 19.03           C  
ANISOU 1468  CB  ASN A1046     2918   3312   1001    -74    -47   -267       C  
ATOM   1469  CG  ASN A1046      51.147 111.537  -9.935  1.00 19.63           C  
ANISOU 1469  CG  ASN A1046     3022   3325   1110   -234    598   -354       C  
ATOM   1470  OD1 ASN A1046      51.093 110.605  -9.133  1.00 21.13           O  
ANISOU 1470  OD1 ASN A1046     3504   3394   1128   -441    411   -434       O  
ATOM   1471  ND2 ASN A1046      52.270 112.199 -10.190  1.00 21.39           N  
ANISOU 1471  ND2 ASN A1046     3370   3160   1599   -769    186   -364       N  
ATOM   1472  N   ILE A1047      49.128 113.047  -7.524  1.00 15.04           N  
ANISOU 1472  N   ILE A1047     2482   2527    704   -155     18   -250       N  
ATOM   1473  CA  ILE A1047      49.499 114.027  -6.511  1.00 13.78           C  
ANISOU 1473  CA  ILE A1047     2196   2351    690   -426    -49   -122       C  
ATOM   1474  C   ILE A1047      50.956 113.785  -6.145  1.00 14.19           C  
ANISOU 1474  C   ILE A1047     2273   2449    668   -264    109    -10       C  
ATOM   1475  O   ILE A1047      51.306 112.715  -5.632  1.00 17.80           O  
ANISOU 1475  O   ILE A1047     3307   2263   1193    -39     92   -236       O  
ATOM   1476  CB  ILE A1047      48.590 113.929  -5.277  1.00 13.67           C  
ANISOU 1476  CB  ILE A1047     2272   2285    639    -32   -253   -197       C  
ATOM   1477  CG1 ILE A1047      47.144 114.259  -5.654  1.00 13.61           C  
ANISOU 1477  CG1 ILE A1047     2328   2142    700   -239   -189    277       C  
ATOM   1478  CG2 ILE A1047      49.084 114.855  -4.177  1.00 16.60           C  
ANISOU 1478  CG2 ILE A1047     3038   2309    961    216     12   -349       C  
ATOM   1479  CD1 ILE A1047      46.175 114.175  -4.494  1.00 14.47           C  
ANISOU 1479  CD1 ILE A1047     2533   2094    870     51    336    350       C  
ATOM   1480  N   HIS A1048      51.807 114.769  -6.418  1.00 14.03           N  
ANISOU 1480  N   HIS A1048     2290   2378    662   -229    140    103       N  
ATOM   1481  CA  HIS A1048      53.233 114.700  -6.110  1.00 16.20           C  
ANISOU 1481  CA  HIS A1048     2474   2722    960   -596     89   -411       C  
ATOM   1482  C   HIS A1048      53.513 115.763  -5.053  1.00 15.47           C  
ANISOU 1482  C   HIS A1048     2387   2432   1060   -547    240   -567       C  
ATOM   1483  O   HIS A1048      53.685 116.942  -5.373  1.00 17.34           O  
ANISOU 1483  O   HIS A1048     3484   1911   1192   -619    443   -107       O  
ATOM   1484  CB  HIS A1048      54.066 114.927  -7.369  1.00 17.87           C  
ANISOU 1484  CB  HIS A1048     2481   3127   1183   -166    155   -442       C  
ATOM   1485  CG  HIS A1048      55.514 114.579  -7.209  1.00 21.95           C  
ANISOU 1485  CG  HIS A1048     3215   3579   1546    247    349   -424       C  
ATOM   1486  ND1 HIS A1048      56.349 114.359  -8.283  1.00 24.42           N  
ANISOU 1486  ND1 HIS A1048     3704   3779   1795    848    198   -525       N  
ATOM   1487  CD2 HIS A1048      56.275 114.410  -6.101  1.00 23.59           C  
ANISOU 1487  CD2 HIS A1048     3370   3725   1867    765    704   -406       C  
ATOM   1488  CE1 HIS A1048      57.561 114.072  -7.845  1.00 28.39           C  
ANISOU 1488  CE1 HIS A1048     4524   4081   2184    673    592   -327       C  
ATOM   1489  NE2 HIS A1048      57.543 114.097  -6.524  1.00 25.48           N  
ANISOU 1489  NE2 HIS A1048     3753   3841   2086   1033    576   -432       N  
ATOM   1490  N   ALA A1049      53.560 115.338  -3.792  1.00 15.36           N  
ANISOU 1490  N   ALA A1049     2576   2378    883    -75    388   -452       N  
ATOM   1491  CA  ALA A1049      53.717 116.259  -2.678  1.00 15.45           C  
ANISOU 1491  CA  ALA A1049     2280   2443   1148   -334   -140   -418       C  
ATOM   1492  C   ALA A1049      55.180 116.668  -2.515  1.00 16.64           C  
ANISOU 1492  C   ALA A1049     2931   2312   1079   -366   -130   -528       C  
ATOM   1493  O   ALA A1049      56.072 116.213  -3.237  1.00 17.81           O  
ANISOU 1493  O   ALA A1049     3059   2444   1264   -122   -263   -400       O  
ATOM   1494  CB  ALA A1049      53.158 115.643  -1.397  1.00 16.37           C  
ANISOU 1494  CB  ALA A1049     2440   2606   1174    113    161    -77       C  
ATOM   1495  N   SER A1050      55.425 117.543  -1.544  1.00 15.45           N  
ANISOU 1495  N   SER A1050     2600   2125   1145   -304    136   -312       N  
ATOM   1496  CA  SER A1050      56.758 118.061  -1.290  1.00 18.51           C  
ANISOU 1496  CA  SER A1050     3179   2495   1359    107   -255   -591       C  
ATOM   1497  C   SER A1050      57.620 117.018  -0.585  1.00 18.25           C  
ANISOU 1497  C   SER A1050     2904   2745   1285    108    358   -777       C  
ATOM   1498  O   SER A1050      57.124 116.091   0.061  1.00 18.58           O  
ANISOU 1498  O   SER A1050     3074   2748   1239   -591    177   -507       O  
ATOM   1499  CB  SER A1050      56.680 119.321  -0.428  1.00 19.11           C  
ANISOU 1499  CB  SER A1050     2792   2722   1745   -115   -643   -546       C  
ATOM   1500  OG  SER A1050      57.971 119.763  -0.047  1.00 21.87           O  
ANISOU 1500  OG  SER A1050     3352   3008   1949     63   -526   -365       O  
ATOM   1501  N   ASN A1051      58.938 117.186  -0.719  1.00 18.57           N  
ANISOU 1501  N   ASN A1051     2636   2992   1427    310    223   -995       N  
ATOM   1502  CA  ASN A1051      59.873 116.335   0.006  1.00 19.30           C  
ANISOU 1502  CA  ASN A1051     2556   3183   1595    390    237   -773       C  
ATOM   1503  C   ASN A1051      59.890 116.644   1.496  1.00 18.53           C  
ANISOU 1503  C   ASN A1051     2698   2804   1539    380    -87   -531       C  
ATOM   1504  O   ASN A1051      60.405 115.838   2.278  1.00 19.90           O  
ANISOU 1504  O   ASN A1051     2989   2803   1768    107   -413   -756       O  
ATOM   1505  CB  ASN A1051      61.286 116.499  -0.556  1.00 22.61           C  
ANISOU 1505  CB  ASN A1051     2711   3772   2106    391    429   -839       C  
ATOM   1506  CG  ASN A1051      61.387 116.103  -2.014  1.00 26.07           C  
ANISOU 1506  CG  ASN A1051     3085   4153   2668    150    895   -673       C  
ATOM   1507  OD1 ASN A1051      60.612 115.281  -2.502  1.00 29.16           O  
ANISOU 1507  OD1 ASN A1051     3669   4481   2930   -806    318   -643       O  
ATOM   1508  ND2 ASN A1051      62.350 116.686  -2.720  1.00 28.58           N  
ANISOU 1508  ND2 ASN A1051     3750   4120   2990    567   1114   -526       N  
ATOM   1509  N   ASN A1052      59.342 117.787   1.903  1.00 17.02           N  
ANISOU 1509  N   ASN A1052     2824   2472   1170    287    119   -799       N  
ATOM   1510  CA AASN A1052      59.359 118.221   3.291  0.37 16.59           C  
ANISOU 1510  CA AASN A1052     2396   2618   1291    175    157   -779       C  
ATOM   1511  CA BASN A1052      59.356 118.208   3.294  0.63 17.13           C  
ANISOU 1511  CA BASN A1052     2523   2737   1249     96   -145   -830       C  
ATOM   1512  C   ASN A1052      57.953 118.616   3.723  1.00 15.89           C  
ANISOU 1512  C   ASN A1052     2381   2476   1181    240    244   -664       C  
ATOM   1513  O   ASN A1052      57.055 118.813   2.901  1.00 16.21           O  
ANISOU 1513  O   ASN A1052     2500   2567   1092     -2    338   -453       O  
ATOM   1514  CB AASN A1052      60.307 119.411   3.493  0.37 17.82           C  
ANISOU 1514  CB AASN A1052     2436   2834   1502    -49    204   -703       C  
ATOM   1515  CB BASN A1052      60.331 119.372   3.516  0.63 20.97           C  
ANISOU 1515  CB BASN A1052     3334   3126   1510   -277   -718   -688       C  
ATOM   1516  CG AASN A1052      61.707 119.140   2.979  0.37 18.77           C  
ANISOU 1516  CG AASN A1052     2433   3074   1625     22    488   -728       C  
ATOM   1517  CG BASN A1052      59.913 120.631   2.780  0.63 24.64           C  
ANISOU 1517  CG BASN A1052     4088   3573   1701   -219   -953   -606       C  
ATOM   1518  OD1AASN A1052      62.169 118.000   2.970  0.37 19.26           O  
ANISOU 1518  OD1AASN A1052     2312   3257   1749   -291    202   -588       O  
ATOM   1519  OD1BASN A1052      59.277 120.568   1.729  0.63 28.30           O  
ANISOU 1519  OD1BASN A1052     4859   3813   2079   -291   -563   -606       O  
ATOM   1520  ND2AASN A1052      62.391 120.194   2.549  0.37 22.40           N  
ANISOU 1520  ND2AASN A1052     3702   3143   1665    454    625   -718       N  
ATOM   1521  ND2BASN A1052      60.268 121.785   3.334  0.63 27.86           N  
ANISOU 1521  ND2BASN A1052     5063   3692   1830   -322   -670   -497       N  
ATOM   1522  N   ILE A1053      57.778 118.735   5.036  1.00 13.23           N  
ANISOU 1522  N   ILE A1053     1699   2143   1184    185    310   -290       N  
ATOM   1523  CA  ILE A1053      56.549 119.231   5.643  1.00 14.02           C  
ANISOU 1523  CA  ILE A1053     2077   2041   1211   -274    416   -353       C  
ATOM   1524  C   ILE A1053      56.933 120.436   6.486  1.00 15.48           C  
ANISOU 1524  C   ILE A1053     2914   1888   1081     91    262   -587       C  
ATOM   1525  O   ILE A1053      57.740 120.315   7.417  1.00 17.40           O  
ANISOU 1525  O   ILE A1053     3213   2178   1221    -60   -459   -625       O  
ATOM   1526  CB  ILE A1053      55.860 118.163   6.506  1.00 14.08           C  
ANISOU 1526  CB  ILE A1053     2084   1982   1284    -71    367   -385       C  
ATOM   1527  CG1 ILE A1053      55.541 116.918   5.677  1.00 15.26           C  
ANISOU 1527  CG1 ILE A1053     2103   1973   1722   -418    530   -368       C  
ATOM   1528  CG2 ILE A1053      54.590 118.725   7.128  1.00 17.67           C  
ANISOU 1528  CG2 ILE A1053     3391   2042   1282   -361    -79   -658       C  
ATOM   1529  CD1 ILE A1053      54.877 115.814   6.474  1.00 16.24           C  
ANISOU 1529  CD1 ILE A1053     1973   2203   1995    290    479   -178       C  
ATOM   1530  N   MET A1054      56.370 121.595   6.159  1.00 15.88           N  
ANISOU 1530  N   MET A1054     3252   1532   1250    395    173   -476       N  
ATOM   1531  CA  MET A1054      56.728 122.853   6.807  1.00 15.21           C  
ANISOU 1531  CA  MET A1054     2775   1744   1261     54     42   -332       C  
ATOM   1532  C   MET A1054      55.592 123.280   7.728  1.00 14.44           C  
ANISOU 1532  C   MET A1054     2465   2054    969    401    414   -316       C  
ATOM   1533  O   MET A1054      54.498 123.615   7.261  1.00 15.55           O  
ANISOU 1533  O   MET A1054     2539   2171   1199    611   -124    -22       O  
ATOM   1534  CB  MET A1054      57.024 123.934   5.770  1.00 16.89           C  
ANISOU 1534  CB  MET A1054     2827   2159   1432   -543    346     29       C  
ATOM   1535  CG  MET A1054      57.424 125.270   6.375  1.00 17.25           C  
ANISOU 1535  CG  MET A1054     2287   2563   1705   -297   -212     82       C  
ATOM   1536  SD  MET A1054      58.954 125.170   7.324  1.00 21.24           S  
ANISOU 1536  SD  MET A1054     3336   2681   2053   -545     27   -237       S  
ATOM   1537  CE  MET A1054      60.141 124.865   6.019  1.00 23.37           C  
ANISOU 1537  CE  MET A1054     3517   3133   2230   -447    448    -99       C  
ATOM   1538  N   PHE A1055      55.855 123.265   9.033  1.00 13.70           N  
ANISOU 1538  N   PHE A1055     2224   2246    736    262    232   -311       N  
ATOM   1539  CA  PHE A1055      54.939 123.812  10.028  1.00 15.49           C  
ANISOU 1539  CA  PHE A1055     2897   2032    958     84     43   -277       C  
ATOM   1540  C   PHE A1055      55.314 125.275  10.229  1.00 14.57           C  
ANISOU 1540  C   PHE A1055     2897   1790    851    140   -273   -299       C  
ATOM   1541  O   PHE A1055      56.328 125.579  10.864  1.00 14.24           O  
ANISOU 1541  O   PHE A1055     2423   1904   1085     72   -654   -261       O  
ATOM   1542  CB  PHE A1055      55.061 123.043  11.341  1.00 14.58           C  
ANISOU 1542  CB  PHE A1055     2210   2276   1052     59     54   -264       C  
ATOM   1543  CG  PHE A1055      54.641 121.603  11.247  1.00 15.69           C  
ANISOU 1543  CG  PHE A1055     2587   2119   1257   -150   -235   -407       C  
ATOM   1544  CD1 PHE A1055      53.378 121.209  11.658  1.00 15.33           C  
ANISOU 1544  CD1 PHE A1055     2332   2244   1249   -212   -348   -310       C  
ATOM   1545  CD2 PHE A1055      55.509 120.643  10.753  1.00 14.14           C  
ANISOU 1545  CD2 PHE A1055     2161   1911   1302    -84   -296   -517       C  
ATOM   1546  CE1 PHE A1055      52.988 119.885  11.575  1.00 14.71           C  
ANISOU 1546  CE1 PHE A1055     2429   1980   1180     92   -126   -277       C  
ATOM   1547  CE2 PHE A1055      55.125 119.318  10.667  1.00 13.95           C  
ANISOU 1547  CE2 PHE A1055     2248   1671   1380    378    -60   -381       C  
ATOM   1548  CZ  PHE A1055      53.863 118.938  11.078  1.00 14.34           C  
ANISOU 1548  CZ  PHE A1055     2490   1852   1108    394    -63    -78       C  
ATOM   1549  N   LYS A1056      54.501 126.180   9.689  1.00 17.82           N  
ANISOU 1549  N   LYS A1056     3908   1790   1074   -316    435     10       N  
ATOM   1550  CA  LYS A1056      54.856 127.591   9.671  1.00 15.77           C  
ANISOU 1550  CA  LYS A1056     2745   1927   1321    105    473     68       C  
ATOM   1551  C   LYS A1056      53.647 128.392   9.216  1.00 15.78           C  
ANISOU 1551  C   LYS A1056     2816   1971   1208    202    583   -188       C  
ATOM   1552  O   LYS A1056      52.943 127.984   8.290  1.00 17.05           O  
ANISOU 1552  O   LYS A1056     3214   2122   1142   -422    297   -394       O  
ATOM   1553  CB  LYS A1056      56.022 127.824   8.701  1.00 15.63           C  
ANISOU 1553  CB  LYS A1056     2221   2104   1614    262    762     92       C  
ATOM   1554  CG  LYS A1056      56.515 129.255   8.613  1.00 18.30           C  
ANISOU 1554  CG  LYS A1056     2863   2251   1840    358    391    170       C  
ATOM   1555  CD  LYS A1056      57.640 129.364   7.594  1.00 21.39           C  
ANISOU 1555  CD  LYS A1056     3566   2335   2227   -113    626    272       C  
ATOM   1556  CE  LYS A1056      58.237 130.759   7.569  1.00 25.56           C  
ANISOU 1556  CE  LYS A1056     4856   2532   2324    160    176    459       C  
ATOM   1557  NZ  LYS A1056      57.245 131.786   7.148  1.00 29.91           N  
ANISOU 1557  NZ  LYS A1056     6303   2791   2270    445   -368    570       N  
ATOM   1558  N   LEU A1057      53.413 129.528   9.870  1.00 14.93           N  
ANISOU 1558  N   LEU A1057     2433   2068   1171    256    315   -235       N  
ATOM   1559  CA  LEU A1057      52.362 130.446   9.442  1.00 15.50           C  
ANISOU 1559  CA  LEU A1057     2662   2001   1224    614    448   -130       C  
ATOM   1560  C   LEU A1057      52.812 131.140   8.162  1.00 17.43           C  
ANISOU 1560  C   LEU A1057     3142   2286   1196    324    293     -1       C  
ATOM   1561  O   LEU A1057      53.758 131.934   8.176  1.00 17.07           O  
ANISOU 1561  O   LEU A1057     2726   2295   1466    -77    161    -86       O  
ATOM   1562  CB  LEU A1057      52.066 131.462  10.542  1.00 14.74           C  
ANISOU 1562  CB  LEU A1057     2705   1941    955    353    506     33       C  
ATOM   1563  CG  LEU A1057      51.038 131.061  11.607  1.00 14.45           C  
ANISOU 1563  CG  LEU A1057     2713   1655   1121    352    439     47       C  
ATOM   1564  CD1 LEU A1057      51.551 129.928  12.487  1.00 17.82           C  
ANISOU 1564  CD1 LEU A1057     3876   1722   1172    482    397    323       C  
ATOM   1565  CD2 LEU A1057      50.641 132.263  12.452  1.00 18.86           C  
ANISOU 1565  CD2 LEU A1057     3899   1865   1401   -124    208   -529       C  
ATOM   1566  N   ASP A1058      52.137 130.841   7.054  1.00 16.07           N  
ANISOU 1566  N   ASP A1058     2681   2471    955   -167   -120     58       N  
ATOM   1567  CA  ASP A1058      52.536 131.298   5.727  1.00 16.05           C  
ANISOU 1567  CA  ASP A1058     2393   2676   1029    164    237     21       C  
ATOM   1568  C   ASP A1058      51.426 132.179   5.168  1.00 15.47           C  
ANISOU 1568  C   ASP A1058     2354   2445   1079   -110    127    188       C  
ATOM   1569  O   ASP A1058      50.319 131.698   4.906  1.00 16.81           O  
ANISOU 1569  O   ASP A1058     2166   2899   1320   -161   -114    284       O  
ATOM   1570  CB  ASP A1058      52.789 130.099   4.813  1.00 20.40           C  
ANISOU 1570  CB  ASP A1058     3487   2862   1404    901    650   -285       C  
ATOM   1571  CG  ASP A1058      53.488 130.478   3.519  1.00 27.71           C  
ANISOU 1571  CG  ASP A1058     4996   3519   2012   1008   1280    -25       C  
ATOM   1572  OD1 ASP A1058      53.539 131.681   3.186  1.00 31.61           O  
ANISOU 1572  OD1 ASP A1058     5855   3884   2271   1487   1056    172       O  
ATOM   1573  OD2 ASP A1058      53.986 129.563   2.830  1.00 31.64           O  
ANISOU 1573  OD2 ASP A1058     5725   3864   2435   1184   1179    190       O  
ATOM   1574  N   GLY A1059      51.724 133.463   4.981  1.00 16.56           N  
ANISOU 1574  N   GLY A1059     2891   2217   1184    196    554    114       N  
ATOM   1575  CA  GLY A1059      50.767 134.376   4.390  1.00 16.82           C  
ANISOU 1575  CA  GLY A1059     3002   2032   1356     21    735    203       C  
ATOM   1576  C   GLY A1059      49.765 134.974   5.348  1.00 17.91           C  
ANISOU 1576  C   GLY A1059     3017   2491   1298    -49    447    281       C  
ATOM   1577  O   GLY A1059      48.716 135.455   4.907  1.00 18.33           O  
ANISOU 1577  O   GLY A1059     2926   2711   1328    439     57    228       O  
ATOM   1578  N   CYS A1060      50.051 134.965   6.647  1.00 16.21           N  
ANISOU 1578  N   CYS A1060     2637   2542    979    110    611     88       N  
ATOM   1579  CA  CYS A1060      49.148 135.524   7.644  1.00 16.61           C  
ANISOU 1579  CA  CYS A1060     2692   2440   1178    265    494     41       C  
ATOM   1580  C   CYS A1060      49.500 136.990   7.867  1.00 18.12           C  
ANISOU 1580  C   CYS A1060     2920   2434   1532    590    282   -173       C  
ATOM   1581  O   CYS A1060      50.647 137.316   8.192  1.00 19.79           O  
ANISOU 1581  O   CYS A1060     3373   2520   1626    455     27   -424       O  
ATOM   1582  CB  CYS A1060      49.258 134.746   8.954  1.00 16.39           C  
ANISOU 1582  CB  CYS A1060     2461   2445   1323    228    468    197       C  
ATOM   1583  SG  CYS A1060      48.119 135.303  10.237  1.00 16.73           S  
ANISOU 1583  SG  CYS A1060     2904   2197   1258    174    295     67       S  
ATOM   1584  N   ARG A1061      48.514 137.870   7.697  1.00 16.72           N  
ANISOU 1584  N   ARG A1061     2558   2233   1561    344    -43   -211       N  
ATOM   1585  CA  ARG A1061      48.731 139.304   7.845  1.00 17.77           C  
ANISOU 1585  CA  ARG A1061     3086   2202   1464    818    -43   -121       C  
ATOM   1586  C   ARG A1061      48.593 139.794   9.281  1.00 17.39           C  
ANISOU 1586  C   ARG A1061     3174   2026   1409    590    -55     55       C  
ATOM   1587  O   ARG A1061      48.978 140.933   9.567  1.00 21.74           O  
ANISOU 1587  O   ARG A1061     4714   1866   1679    198    298    -23       O  
ATOM   1588  CB  ARG A1061      47.793 140.088   6.918  1.00 20.89           C  
ANISOU 1588  CB  ARG A1061     4166   2526   1245   1077    -62    105       C  
ATOM   1589  CG  ARG A1061      48.143 139.949   5.442  1.00 23.06           C  
ANISOU 1589  CG  ARG A1061     4437   2769   1556   1027   -393    449       C  
ATOM   1590  CD  ARG A1061      47.258 140.817   4.561  1.00 28.53           C  
ANISOU 1590  CD  ARG A1061     5685   3208   1948    323    -10    636       C  
ATOM   1591  NE  ARG A1061      45.961 140.201   4.299  1.00 30.26           N  
ANISOU 1591  NE  ARG A1061     5861   3412   2225   -171    276    394       N  
ATOM   1592  CZ  ARG A1061      45.724 139.358   3.299  1.00 31.94           C  
ANISOU 1592  CZ  ARG A1061     6495   3538   2101   -268    635    798       C  
ATOM   1593  NH1 ARG A1061      46.699 139.024   2.465  1.00 33.47           N  
ANISOU 1593  NH1 ARG A1061     6968   3585   2164    -22    468    819       N  
ATOM   1594  NH2 ARG A1061      44.512 138.846   3.133  1.00 31.03           N  
ANISOU 1594  NH2 ARG A1061     6242   3544   2003   -244    306    877       N  
ATOM   1595  N   ASP A1062      48.064 138.973  10.185  1.00 17.43           N  
ANISOU 1595  N   ASP A1062     3104   2139   1381     49     15     36       N  
ATOM   1596  CA  ASP A1062      47.980 139.331  11.598  1.00 17.69           C  
ANISOU 1596  CA  ASP A1062     2959   2225   1539   -434    558     45       C  
ATOM   1597  C   ASP A1062      49.326 139.033  12.247  1.00 16.06           C  
ANISOU 1597  C   ASP A1062     2264   2130   1709   -217     71    -54       C  
ATOM   1598  O   ASP A1062      49.670 137.868  12.473  1.00 17.29           O  
ANISOU 1598  O   ASP A1062     2738   1903   1929   -317   -130    371       O  
ATOM   1599  CB  ASP A1062      46.859 138.543  12.269  1.00 18.80           C  
ANISOU 1599  CB  ASP A1062     3495   2112   1535   -474    663    -53       C  
ATOM   1600  CG  ASP A1062      46.762 138.812  13.761  1.00 20.47           C  
ANISOU 1600  CG  ASP A1062     3875   2153   1750     76    540    -31       C  
ATOM   1601  OD1 ASP A1062      47.259 139.863  14.220  1.00 22.81           O  
ANISOU 1601  OD1 ASP A1062     4374   2601   1690   -367    687   -223       O  
ATOM   1602  OD2 ASP A1062      46.179 137.971  14.477  1.00 19.88           O  
ANISOU 1602  OD2 ASP A1062     3081   2551   1923   -220    251   -244       O  
ATOM   1603  N   THR A1063      50.090 140.086  12.550  1.00 16.17           N  
ANISOU 1603  N   THR A1063     2833   1881   1429   -370    -28     30       N  
ATOM   1604  CA  THR A1063      51.425 139.911  13.113  1.00 18.92           C  
ANISOU 1604  CA  THR A1063     3470   1935   1786   -382     47     93       C  
ATOM   1605  C   THR A1063      51.402 139.281  14.500  1.00 18.86           C  
ANISOU 1605  C   THR A1063     3509   2013   1645   -516    217    180       C  
ATOM   1606  O   THR A1063      52.421 138.733  14.933  1.00 19.94           O  
ANISOU 1606  O   THR A1063     3650   2258   1668   -257    188     92       O  
ATOM   1607  CB  THR A1063      52.164 141.250  13.157  1.00 21.55           C  
ANISOU 1607  CB  THR A1063     4261   1875   2051   -350   -102    268       C  
ATOM   1608  OG1 THR A1063      51.454 142.164  14.003  1.00 24.36           O  
ANISOU 1608  OG1 THR A1063     5204   1812   2239   -928    -53     54       O  
ATOM   1609  CG2 THR A1063      52.277 141.844  11.760  1.00 20.48           C  
ANISOU 1609  CG2 THR A1063     4131   1578   2072   -693   -195    442       C  
ATOM   1610  N   HIS A1064      50.275 139.346  15.204  1.00 18.16           N  
ANISOU 1610  N   HIS A1064     3225   2006   1667   -629    327    143       N  
ATOM   1611  CA  HIS A1064      50.156 138.775  16.538  1.00 19.43           C  
ANISOU 1611  CA  HIS A1064     3693   2105   1586    -85    145   -273       C  
ATOM   1612  C   HIS A1064      49.597 137.359  16.531  1.00 18.92           C  
ANISOU 1612  C   HIS A1064     3921   2087   1182   -186     53   -203       C  
ATOM   1613  O   HIS A1064      49.411 136.776  17.604  1.00 19.35           O  
ANISOU 1613  O   HIS A1064     4203   2017   1132    -56    307    -67       O  
ATOM   1614  CB  HIS A1064      49.278 139.670  17.419  1.00 21.29           C  
ANISOU 1614  CB  HIS A1064     3995   2020   2073    584    524   -581       C  
ATOM   1615  CG  HIS A1064      49.681 141.112  17.405  1.00 27.11           C  
ANISOU 1615  CG  HIS A1064     5528   2287   2484    221    791   -623       C  
ATOM   1616  ND1 HIS A1064      50.789 141.582  18.075  1.00 31.59           N  
ANISOU 1616  ND1 HIS A1064     6367   2687   2949   -123    408   -414       N  
ATOM   1617  CD2 HIS A1064      49.123 142.187  16.800  1.00 30.67           C  
ANISOU 1617  CD2 HIS A1064     6443   2527   2684   -142   1052   -540       C  
ATOM   1618  CE1 HIS A1064      50.896 142.885  17.884  1.00 32.48           C  
ANISOU 1618  CE1 HIS A1064     6570   2746   3024    -23    302   -197       C  
ATOM   1619  NE2 HIS A1064      49.898 143.277  17.114  1.00 32.89           N  
ANISOU 1619  NE2 HIS A1064     6899   2698   2900    -81    958   -328       N  
ATOM   1620  N   ARG A1065      49.332 136.794  15.357  1.00 18.07           N  
ANISOU 1620  N   ARG A1065     3762   1995   1108   -191    -77    -41       N  
ATOM   1621  CA  ARG A1065      48.716 135.479  15.277  1.00 16.45           C  
ANISOU 1621  CA  ARG A1065     3614   1726    909     17   -112     -8       C  
ATOM   1622  C   ARG A1065      49.711 134.388  15.658  1.00 16.34           C  
ANISOU 1622  C   ARG A1065     3080   2011   1116     68    173    237       C  
ATOM   1623  O   ARG A1065      50.912 134.485  15.391  1.00 16.11           O  
ANISOU 1623  O   ARG A1065     2888   2054   1179   -284    369    238       O  
ATOM   1624  CB  ARG A1065      48.198 135.232  13.859  1.00 15.22           C  
ANISOU 1624  CB  ARG A1065     2966   1836    982   -231   -177    -53       C  
ATOM   1625  CG  ARG A1065      47.356 133.977  13.707  1.00 14.92           C  
ANISOU 1625  CG  ARG A1065     2842   1910    919     69    139   -107       C  
ATOM   1626  CD  ARG A1065      45.926 134.321  13.320  1.00 15.34           C  
ANISOU 1626  CD  ARG A1065     2634   2356    837    444    369    -73       C  
ATOM   1627  NE  ARG A1065      45.271 135.163  14.319  1.00 17.19           N  
ANISOU 1627  NE  ARG A1065     2502   2991   1039    649    416     49       N  
ATOM   1628  CZ  ARG A1065      44.564 134.699  15.345  1.00 16.24           C  
ANISOU 1628  CZ  ARG A1065     2252   2772   1146   1216    -13   -382       C  
ATOM   1629  NH1 ARG A1065      44.413 133.392  15.517  1.00 21.02           N  
ANISOU 1629  NH1 ARG A1065     3668   3236   1082    736    203    -73       N  
ATOM   1630  NH2 ARG A1065      44.004 135.544  16.201  1.00 15.69           N  
ANISOU 1630  NH2 ARG A1065     1771   3239    950     76    181    197       N  
ATOM   1631  N   TYR A1066      49.194 133.344  16.301  1.00 15.81           N  
ANISOU 1631  N   TYR A1066     2962   2074    969   -219     69    140       N  
ATOM   1632  CA  TYR A1066      49.976 132.158  16.614  1.00 14.15           C  
ANISOU 1632  CA  TYR A1066     2535   1876    963   -386    179     41       C  
ATOM   1633  C   TYR A1066      49.039 130.960  16.647  1.00 13.69           C  
ANISOU 1633  C   TYR A1066     2233   1990    979   -431     75    136       C  
ATOM   1634  O   TYR A1066      47.817 131.101  16.557  1.00 14.23           O  
ANISOU 1634  O   TYR A1066     2144   2235   1029   -479     51    -30       O  
ATOM   1635  CB  TYR A1066      50.738 132.305  17.939  1.00 14.34           C  
ANISOU 1635  CB  TYR A1066     2525   1778   1145    210    316   -269       C  
ATOM   1636  CG  TYR A1066      49.855 132.501  19.154  1.00 15.94           C  
ANISOU 1636  CG  TYR A1066     2697   2302   1055    703    428    -83       C  
ATOM   1637  CD1 TYR A1066      49.324 131.413  19.838  1.00 16.66           C  
ANISOU 1637  CD1 TYR A1066     2957   2494    877    458     85   -268       C  
ATOM   1638  CD2 TYR A1066      49.561 133.775  19.623  1.00 18.36           C  
ANISOU 1638  CD2 TYR A1066     3358   2262   1356    902    688   -124       C  
ATOM   1639  CE1 TYR A1066      48.519 131.590  20.949  1.00 16.82           C  
ANISOU 1639  CE1 TYR A1066     2893   2633    865    502    215     17       C  
ATOM   1640  CE2 TYR A1066      48.758 133.961  20.733  1.00 18.75           C  
ANISOU 1640  CE2 TYR A1066     3243   2641   1239    611    724   -147       C  
ATOM   1641  CZ  TYR A1066      48.240 132.866  21.392  1.00 18.51           C  
ANISOU 1641  CZ  TYR A1066     3230   2662   1142    488    663    -96       C  
ATOM   1642  OH  TYR A1066      47.441 133.047  22.499  1.00 20.30           O  
ANISOU 1642  OH  TYR A1066     3520   2728   1465    274    471   -136       O  
ATOM   1643  N   ILE A1067      49.626 129.770  16.765  1.00 14.06           N  
ANISOU 1643  N   ILE A1067     2280   2002   1062    277   -117   -201       N  
ATOM   1644  CA  ILE A1067      48.868 128.541  16.966  1.00 13.39           C  
ANISOU 1644  CA  ILE A1067     2070   2057    963     29   -584   -415       C  
ATOM   1645  C   ILE A1067      49.602 127.666  17.971  1.00 12.59           C  
ANISOU 1645  C   ILE A1067     1929   2017    839    373   -148    -84       C  
ATOM   1646  O   ILE A1067      50.822 127.761  18.135  1.00 13.84           O  
ANISOU 1646  O   ILE A1067     2487   2012    761    -74     21    -33       O  
ATOM   1647  CB  ILE A1067      48.617 127.745  15.660  1.00 14.86           C  
ANISOU 1647  CB  ILE A1067     2261   2372   1015    209   -288   -276       C  
ATOM   1648  CG1 ILE A1067      49.937 127.249  15.065  1.00 15.24           C  
ANISOU 1648  CG1 ILE A1067     2121   2340   1330    367   -379   -494       C  
ATOM   1649  CG2 ILE A1067      47.828 128.567  14.647  1.00 15.64           C  
ANISOU 1649  CG2 ILE A1067     2576   2458    908    575   -354    192       C  
ATOM   1650  CD1 ILE A1067      49.760 126.299  13.899  1.00 16.69           C  
ANISOU 1650  CD1 ILE A1067     2527   2382   1433    151    -48   -576       C  
ATOM   1651  N   TRP A1068      48.841 126.816  18.654  1.00 15.11           N  
ANISOU 1651  N   TRP A1068     2786   2071    884     57     93     94       N  
ATOM   1652  CA  TRP A1068      49.381 125.705  19.422  1.00 14.15           C  
ANISOU 1652  CA  TRP A1068     2694   1882    802    166   -298   -169       C  
ATOM   1653  C   TRP A1068      49.055 124.413  18.686  1.00 14.50           C  
ANISOU 1653  C   TRP A1068     2873   1794    844     25    168   -340       C  
ATOM   1654  O   TRP A1068      47.951 124.255  18.158  1.00 16.98           O  
ANISOU 1654  O   TRP A1068     3519   2019    915   -224   -225    -42       O  
ATOM   1655  CB  TRP A1068      48.774 125.651  20.827  1.00 15.63           C  
ANISOU 1655  CB  TRP A1068     3241   1747    951    -57    -91   -355       C  
ATOM   1656  CG  TRP A1068      49.293 126.695  21.773  1.00 17.37           C  
ANISOU 1656  CG  TRP A1068     3873   1718   1011   -195    -92   -153       C  
ATOM   1657  CD1 TRP A1068      48.711 127.893  22.070  1.00 17.67           C  
ANISOU 1657  CD1 TRP A1068     3973   1693   1048   -127   -264   -116       C  
ATOM   1658  CD2 TRP A1068      50.492 126.626  22.555  1.00 17.58           C  
ANISOU 1658  CD2 TRP A1068     3765   1790   1123    -95   -263    -57       C  
ATOM   1659  NE1 TRP A1068      49.476 128.577  22.986  1.00 19.89           N  
ANISOU 1659  NE1 TRP A1068     4378   2035   1143    371   -112    107       N  
ATOM   1660  CE2 TRP A1068      50.574 127.821  23.299  1.00 18.12           C  
ANISOU 1660  CE2 TRP A1068     3587   1973   1324    278   -589    158       C  
ATOM   1661  CE3 TRP A1068      51.505 125.672  22.698  1.00 17.84           C  
ANISOU 1661  CE3 TRP A1068     3171   2115   1493   -321   -152   -114       C  
ATOM   1662  CZ2 TRP A1068      51.629 128.086  24.172  1.00 17.15           C  
ANISOU 1662  CZ2 TRP A1068     3284   1916   1316    609   -851    -21       C  
ATOM   1663  CZ3 TRP A1068      52.551 125.938  23.565  1.00 19.02           C  
ANISOU 1663  CZ3 TRP A1068     3730   1879   1617     69   -391   -304       C  
ATOM   1664  CH2 TRP A1068      52.605 127.135  24.290  1.00 17.53           C  
ANISOU 1664  CH2 TRP A1068     3501   1748   1412    166   -770    -24       C  
ATOM   1665  N   ILE A1069      50.018 123.494  18.645  1.00 15.49           N  
ANISOU 1665  N   ILE A1069     2832   2155    899    264    193   -321       N  
ATOM   1666  CA  ILE A1069      49.857 122.232  17.931  1.00 12.95           C  
ANISOU 1666  CA  ILE A1069     2137   2066    716    268    235   -312       C  
ATOM   1667  C   ILE A1069      50.579 121.133  18.701  1.00 13.33           C  
ANISOU 1667  C   ILE A1069     2076   1798   1189    708   -224     32       C  
ATOM   1668  O   ILE A1069      51.575 121.381  19.387  1.00 16.16           O  
ANISOU 1668  O   ILE A1069     2776   2008   1355    -88   -817    -89       O  
ATOM   1669  CB  ILE A1069      50.353 122.336  16.467  1.00 16.09           C  
ANISOU 1669  CB  ILE A1069     2379   2585   1150   -118    399   -760       C  
ATOM   1670  CG1 ILE A1069      49.934 121.106  15.657  1.00 19.83           C  
ANISOU 1670  CG1 ILE A1069     3262   2948   1323   -527    415   -799       C  
ATOM   1671  CG2 ILE A1069      51.862 122.531  16.419  1.00 15.98           C  
ANISOU 1671  CG2 ILE A1069     2092   2945   1034   -645    429   -436       C  
ATOM   1672  CD1 ILE A1069      50.287 121.195  14.187  1.00 22.37           C  
ANISOU 1672  CD1 ILE A1069     3757   3079   1665  -1027    339   -942       C  
ATOM   1673  N   LYS A1070      50.058 119.910  18.597  1.00 15.12           N  
ANISOU 1673  N   LYS A1070     3311   1584    850     70     93    -17       N  
ATOM   1674  CA  LYS A1070      50.654 118.771  19.282  1.00 16.63           C  
ANISOU 1674  CA  LYS A1070     3599   1694   1024     98     64   -231       C  
ATOM   1675  C   LYS A1070      50.175 117.480  18.634  1.00 15.80           C  
ANISOU 1675  C   LYS A1070     3094   1993    917   -150    -53   -307       C  
ATOM   1676  O   LYS A1070      49.116 117.433  18.002  1.00 17.00           O  
ANISOU 1676  O   LYS A1070     3113   2292   1053    238    264    -24       O  
ATOM   1677  CB  LYS A1070      50.319 118.770  20.779  1.00 15.49           C  
ANISOU 1677  CB  LYS A1070     2675   2125   1083   -134    522   -368       C  
ATOM   1678  CG  LYS A1070      48.847 118.558  21.095  1.00 15.62           C  
ANISOU 1678  CG  LYS A1070     2742   2256    936   -126    363   -495       C  
ATOM   1679  CD  LYS A1070      48.588 118.565  22.596  1.00 16.81           C  
ANISOU 1679  CD  LYS A1070     2545   2715   1128   -565    578   -196       C  
ATOM   1680  CE  LYS A1070      47.106 118.402  22.902  1.00 20.89           C  
ANISOU 1680  CE  LYS A1070     3912   2776   1249   -308    756     26       C  
ATOM   1681  NZ  LYS A1070      46.823 118.462  24.365  1.00 24.91           N  
ANISOU 1681  NZ  LYS A1070     4810   3213   1441   -584    704     87       N  
ATOM   1682  N   TYR A1071      50.985 116.431  18.797  1.00 16.71           N  
ANISOU 1682  N   TYR A1071     3206   2194    949   -127   -333   -329       N  
ATOM   1683  CA  TYR A1071      50.620 115.063  18.415  1.00 16.21           C  
ANISOU 1683  CA  TYR A1071     2873   2318    966   -595   -478    -45       C  
ATOM   1684  C   TYR A1071      50.335 114.931  16.918  1.00 17.82           C  
ANISOU 1684  C   TYR A1071     3272   2649    851    -31   -238     88       C  
ATOM   1685  O   TYR A1071      49.320 114.365  16.507  1.00 22.28           O  
ANISOU 1685  O   TYR A1071     4517   2638   1311   -746   -533     -8       O  
ATOM   1686  CB  TYR A1071      49.448 114.532  19.246  1.00 18.53           C  
ANISOU 1686  CB  TYR A1071     3468   2556   1018   -528    115    336       C  
ATOM   1687  CG  TYR A1071      49.671 114.522  20.742  1.00 17.95           C  
ANISOU 1687  CG  TYR A1071     3304   2643    874   -154     71    255       C  
ATOM   1688  CD1 TYR A1071      50.947 114.416  21.280  1.00 18.94           C  
ANISOU 1688  CD1 TYR A1071     3510   2785    901    255     82     19       C  
ATOM   1689  CD2 TYR A1071      48.597 114.614  21.618  1.00 20.52           C  
ANISOU 1689  CD2 TYR A1071     3739   3032   1025     17   -243    364       C  
ATOM   1690  CE1 TYR A1071      51.147 114.404  22.650  1.00 19.98           C  
ANISOU 1690  CE1 TYR A1071     3355   3309    926    -36    311    305       C  
ATOM   1691  CE2 TYR A1071      48.786 114.604  22.986  1.00 19.72           C  
ANISOU 1691  CE2 TYR A1071     3156   3395    943    -16   -345    285       C  
ATOM   1692  CZ  TYR A1071      50.061 114.499  23.497  1.00 22.63           C  
ANISOU 1692  CZ  TYR A1071     3860   3713   1026      2    -70    400       C  
ATOM   1693  OH  TYR A1071      50.248 114.489  24.861  1.00 28.80           O  
ANISOU 1693  OH  TYR A1071     5234   4270   1440   -291    399    406       O  
ATOM   1694  N   PHE A1072      51.244 115.446  16.095  1.00 18.20           N  
ANISOU 1694  N   PHE A1072     3369   2596    949    520     56   -240       N  
ATOM   1695  CA  PHE A1072      51.081 115.322  14.653  1.00 16.98           C  
ANISOU 1695  CA  PHE A1072     3081   2468    904    335    235   -304       C  
ATOM   1696  C   PHE A1072      51.457 113.920  14.195  1.00 15.74           C  
ANISOU 1696  C   PHE A1072     2682   2519    780    366   -155   -197       C  
ATOM   1697  O   PHE A1072      52.484 113.369  14.603  1.00 18.20           O  
ANISOU 1697  O   PHE A1072     3068   2602   1245    379   -467   -443       O  
ATOM   1698  CB  PHE A1072      51.934 116.349  13.908  1.00 15.75           C  
ANISOU 1698  CB  PHE A1072     2827   2333    825     66    268   -252       C  
ATOM   1699  CG  PHE A1072      51.743 116.316  12.416  1.00 15.14           C  
ANISOU 1699  CG  PHE A1072     2467   2477    807      0    134   -330       C  
ATOM   1700  CD1 PHE A1072      50.708 117.021  11.822  1.00 17.44           C  
ANISOU 1700  CD1 PHE A1072     3291   2462    873    -13    267   -152       C  
ATOM   1701  CD2 PHE A1072      52.588 115.571  11.608  1.00 15.33           C  
ANISOU 1701  CD2 PHE A1072     2492   2489    844   -118    228   -332       C  
ATOM   1702  CE1 PHE A1072      50.524 116.988  10.451  1.00 18.13           C  
ANISOU 1702  CE1 PHE A1072     3253   2555   1080     -1    703   -114       C  
ATOM   1703  CE2 PHE A1072      52.408 115.534  10.238  1.00 18.92           C  
ANISOU 1703  CE2 PHE A1072     3601   2498   1090     93    446   -374       C  
ATOM   1704  CZ  PHE A1072      51.375 116.244   9.659  1.00 18.17           C  
ANISOU 1704  CZ  PHE A1072     3209   2567   1128    -45    177   -318       C  
ATOM   1705  N   ASN A1073      50.619 113.347  13.333  1.00 14.71           N  
ANISOU 1705  N   ASN A1073     2448   2443    698      7   -136   -325       N  
ATOM   1706  CA  ASN A1073      50.859 112.021  12.786  1.00 16.16           C  
ANISOU 1706  CA  ASN A1073     2931   2417    792   -223   -119   -215       C  
ATOM   1707  C   ASN A1073      50.471 111.992  11.316  1.00 15.37           C  
ANISOU 1707  C   ASN A1073     2785   2244    811    -13   -111   -407       C  
ATOM   1708  O   ASN A1073      49.545 112.685  10.886  1.00 15.55           O  
ANISOU 1708  O   ASN A1073     2566   2480    863    174    -35   -381       O  
ATOM   1709  CB  ASN A1073      50.075 110.937  13.539  1.00 17.62           C  
ANISOU 1709  CB  ASN A1073     3396   2391    907   -369    236    -10       C  
ATOM   1710  CG  ASN A1073      50.657 110.640  14.904  1.00 17.48           C  
ANISOU 1710  CG  ASN A1073     3108   2618    915    134   -275    395       C  
ATOM   1711  OD1 ASN A1073      50.239 111.216  15.909  1.00 19.78           O  
ANISOU 1711  OD1 ASN A1073     3908   2570   1036    236   -264   -190       O  
ATOM   1712  ND2 ASN A1073      51.630 109.737  14.949  1.00 18.77           N  
ANISOU 1712  ND2 ASN A1073     3158   2837   1137    571     48    289       N  
ATOM   1713  N   LEU A1074      51.195 111.181  10.552  1.00 15.84           N  
ANISOU 1713  N   LEU A1074     3060   2051    908    108    154   -397       N  
ATOM   1714  CA  LEU A1074      50.897 110.928   9.150  1.00 15.00           C  
ANISOU 1714  CA  LEU A1074     2970   1949    782    131    227    -76       C  
ATOM   1715  C   LEU A1074      50.720 109.428   8.969  1.00 15.59           C  
ANISOU 1715  C   LEU A1074     2547   2252   1124    353    -27   -572       C  
ATOM   1716  O   LEU A1074      51.535 108.641   9.462  1.00 17.54           O  
ANISOU 1716  O   LEU A1074     2616   2684   1364    -53   -296   -412       O  
ATOM   1717  CB  LEU A1074      52.031 111.433   8.255  1.00 16.18           C  
ANISOU 1717  CB  LEU A1074     2914   2292    942    153    587    -61       C  
ATOM   1718  CG  LEU A1074      51.721 111.592   6.765  1.00 19.96           C  
ANISOU 1718  CG  LEU A1074     3327   2937   1320    115    567    257       C  
ATOM   1719  CD1 LEU A1074      50.633 112.634   6.551  1.00 22.58           C  
ANISOU 1719  CD1 LEU A1074     3695   3172   1712    578    438    857       C  
ATOM   1720  CD2 LEU A1074      52.979 111.962   5.995  1.00 19.49           C  
ANISOU 1720  CD2 LEU A1074     3013   3158   1236   -114   -114    218       C  
ATOM   1721  N   PHE A1075      49.655 109.037   8.275  1.00 14.84           N  
ANISOU 1721  N   PHE A1075     2329   2348    961   -184    -18   -680       N  
ATOM   1722  CA  PHE A1075      49.329 107.637   8.049  1.00 16.86           C  
ANISOU 1722  CA  PHE A1075     2823   2648    934     42      2   -640       C  
ATOM   1723  C   PHE A1075      49.265 107.373   6.552  1.00 19.28           C  
ANISOU 1723  C   PHE A1075     3321   2889   1118    261    161   -680       C  
ATOM   1724  O   PHE A1075      48.819 108.229   5.783  1.00 19.72           O  
ANISOU 1724  O   PHE A1075     3188   3120   1183    495   -306   -680       O  
ATOM   1725  CB  PHE A1075      47.975 107.284   8.674  1.00 17.72           C  
ANISOU 1725  CB  PHE A1075     3052   2662   1019   -112    329   -578       C  
ATOM   1726  CG  PHE A1075      47.884 107.589  10.142  1.00 17.70           C  
ANISOU 1726  CG  PHE A1075     2918   2793   1015   -154    214   -643       C  
ATOM   1727  CD1 PHE A1075      48.185 106.618  11.084  1.00 19.53           C  
ANISOU 1727  CD1 PHE A1075     3309   2955   1156   -278   -285   -694       C  
ATOM   1728  CD2 PHE A1075      47.493 108.843  10.582  1.00 17.11           C  
ANISOU 1728  CD2 PHE A1075     2552   2952    995    -13    179   -642       C  
ATOM   1729  CE1 PHE A1075      48.101 106.894  12.436  1.00 21.72           C  
ANISOU 1729  CE1 PHE A1075     3871   3238   1143   -120   -213   -579       C  
ATOM   1730  CE2 PHE A1075      47.407 109.126  11.932  1.00 18.69           C  
ANISOU 1730  CE2 PHE A1075     2907   3063   1132   -350    319   -687       C  
ATOM   1731  CZ  PHE A1075      47.712 108.150  12.860  1.00 18.87           C  
ANISOU 1731  CZ  PHE A1075     3223   2876   1070   -236    181   -642       C  
ATOM   1732  N   ASP A1076      49.710 106.187   6.142  1.00 20.29           N  
ANISOU 1732  N   ASP A1076     3619   2880   1210     81    140   -759       N  
ATOM   1733  CA  ASP A1076      49.669 105.778   4.739  1.00 18.27           C  
ANISOU 1733  CA  ASP A1076     2788   2799   1354    506     54   -908       C  
ATOM   1734  C   ASP A1076      48.444 104.930   4.421  1.00 17.77           C  
ANISOU 1734  C   ASP A1076     2811   2638   1302    299     -9   -703       C  
ATOM   1735  O   ASP A1076      48.514 103.981   3.635  1.00 21.11           O  
ANISOU 1735  O   ASP A1076     3653   2730   1639     92    -14  -1139       O  
ATOM   1736  CB  ASP A1076      50.961 105.071   4.333  1.00 22.60           C  
ANISOU 1736  CB  ASP A1076     3750   3044   1794    854    123  -1026       C  
ATOM   1737  CG  ASP A1076      51.212 103.804   5.126  1.00 25.80           C  
ANISOU 1737  CG  ASP A1076     4623   3021   2158    929   -190  -1076       C  
ATOM   1738  OD1 ASP A1076      50.572 103.619   6.182  1.00 27.99           O  
ANISOU 1738  OD1 ASP A1076     5023   3139   2475    219   -276   -446       O  
ATOM   1739  OD2 ASP A1076      52.058 102.993   4.693  1.00 31.63           O  
ANISOU 1739  OD2 ASP A1076     5757   3505   2755    358   -398   -856       O  
ATOM   1740  N   LYS A1077      47.305 105.256   5.028  1.00 17.14           N  
ANISOU 1740  N   LYS A1077     2999   2315   1199    393    -59   -408       N  
ATOM   1741  CA  LYS A1077      46.046 104.588   4.732  1.00 17.26           C  
ANISOU 1741  CA  LYS A1077     2969   2298   1291    136     55     41       C  
ATOM   1742  C   LYS A1077      44.911 105.524   5.119  1.00 17.53           C  
ANISOU 1742  C   LYS A1077     3037   2534   1089    307    337   -188       C  
ATOM   1743  O   LYS A1077      45.122 106.552   5.768  1.00 16.72           O  
ANISOU 1743  O   LYS A1077     2850   2517    984    137    259   -283       O  
ATOM   1744  CB  LYS A1077      45.924 103.252   5.474  1.00 18.92           C  
ANISOU 1744  CB  LYS A1077     3580   2338   1270   -300   -124    314       C  
ATOM   1745  CG  LYS A1077      45.628 103.391   6.960  1.00 21.37           C  
ANISOU 1745  CG  LYS A1077     4036   2424   1660   -391    -55    660       C  
ATOM   1746  CD  LYS A1077      45.321 102.041   7.587  1.00 24.82           C  
ANISOU 1746  CD  LYS A1077     4641   2780   2011   -753    166    993       C  
ATOM   1747  CE  LYS A1077      44.890 102.188   9.038  1.00 30.24           C  
ANISOU 1747  CE  LYS A1077     5628   2965   2897  -1127    476    798       C  
ATOM   1748  NZ  LYS A1077      44.508 100.880   9.638  1.00 33.56           N  
ANISOU 1748  NZ  LYS A1077     6244   3138   3368   -942    591    610       N  
ATOM   1749  N   GLU A1078      43.700 105.157   4.708  1.00 16.28           N  
ANISOU 1749  N   GLU A1078     2513   2655   1018   -189    313     78       N  
ATOM   1750  CA  GLU A1078      42.497 105.889   5.086  1.00 16.61           C  
ANISOU 1750  CA  GLU A1078     2552   2800    958   -121   -332    -23       C  
ATOM   1751  C   GLU A1078      42.007 105.335   6.419  1.00 15.73           C  
ANISOU 1751  C   GLU A1078     2415   2370   1192   -279    288      2       C  
ATOM   1752  O   GLU A1078      41.503 104.210   6.482  1.00 19.23           O  
ANISOU 1752  O   GLU A1078     3159   2503   1644   -752    422   -326       O  
ATOM   1753  CB  GLU A1078      41.420 105.746   4.015  1.00 17.41           C  
ANISOU 1753  CB  GLU A1078     2700   2889   1027   -274   -270   -142       C  
ATOM   1754  CG  GLU A1078      40.132 106.491   4.340  1.00 16.00           C  
ANISOU 1754  CG  GLU A1078     2484   2671    923    -83   -474   -431       C  
ATOM   1755  CD  GLU A1078      38.975 106.088   3.445  1.00 17.33           C  
ANISOU 1755  CD  GLU A1078     2681   2967    938    206    288   -370       C  
ATOM   1756  OE1 GLU A1078      39.023 104.981   2.867  1.00 19.58           O  
ANISOU 1756  OE1 GLU A1078     3591   2923    925     28     41   -230       O  
ATOM   1757  OE2 GLU A1078      38.016 106.878   3.321  1.00 21.01           O  
ANISOU 1757  OE2 GLU A1078     3721   3216   1047    145     66   -486       O  
ATOM   1758  N   LEU A1079      42.165 106.118   7.483  1.00 15.92           N  
ANISOU 1758  N   LEU A1079     2784   2164   1102    174    107   -175       N  
ATOM   1759  CA  LEU A1079      41.688 105.699   8.793  1.00 15.93           C  
ANISOU 1759  CA  LEU A1079     2579   2263   1211   -492     14   -133       C  
ATOM   1760  C   LEU A1079      40.168 105.596   8.789  1.00 17.51           C  
ANISOU 1760  C   LEU A1079     2624   2499   1529   -484    316    -67       C  
ATOM   1761  O   LEU A1079      39.475 106.437   8.209  1.00 18.23           O  
ANISOU 1761  O   LEU A1079     2890   2639   1398   -702    734   -191       O  
ATOM   1762  CB  LEU A1079      42.125 106.708   9.854  1.00 15.98           C  
ANISOU 1762  CB  LEU A1079     2519   2179   1375   -516      9   -480       C  
ATOM   1763  CG  LEU A1079      43.630 106.907  10.048  1.00 17.23           C  
ANISOU 1763  CG  LEU A1079     2539   2349   1660   -742    251   -495       C  
ATOM   1764  CD1 LEU A1079      43.900 108.015  11.057  1.00 18.70           C  
ANISOU 1764  CD1 LEU A1079     2792   2612   1703   -719    305   -604       C  
ATOM   1765  CD2 LEU A1079      44.286 105.608  10.484  1.00 19.33           C  
ANISOU 1765  CD2 LEU A1079     2841   2698   1805   -402   -177   -292       C  
ATOM   1766  N   ASN A1080      39.648 104.554   9.435  1.00 17.05           N  
ANISOU 1766  N   ASN A1080     2528   2567   1383   -949    245   -131       N  
ATOM   1767  CA  ASN A1080      38.209 104.386   9.560  1.00 17.94           C  
ANISOU 1767  CA  ASN A1080     2730   2484   1603  -1032    392   -330       C  
ATOM   1768  C   ASN A1080      37.698 105.147  10.785  1.00 18.93           C  
ANISOU 1768  C   ASN A1080     2947   2753   1493  -1009     95   -307       C  
ATOM   1769  O   ASN A1080      38.470 105.717  11.558  1.00 17.78           O  
ANISOU 1769  O   ASN A1080     2849   2622   1284   -882    -83   -428       O  
ATOM   1770  CB  ASN A1080      37.825 102.902   9.558  1.00 20.99           C  
ANISOU 1770  CB  ASN A1080     3782   2362   1833   -792     90   -490       C  
ATOM   1771  CG  ASN A1080      38.423 102.130  10.724  1.00 22.80           C  
ANISOU 1771  CG  ASN A1080     4409   2396   1858   -663    111   -598       C  
ATOM   1772  OD1 ASN A1080      38.378 102.576  11.869  1.00 22.32           O  
ANISOU 1772  OD1 ASN A1080     4250   2448   1785   -721    162   -595       O  
ATOM   1773  ND2 ASN A1080      38.972 100.955  10.435  1.00 26.41           N  
ANISOU 1773  ND2 ASN A1080     5468   2627   1941     32    422   -701       N  
ATOM   1774  N   GLU A1081      36.376 105.151  10.973  1.00 21.45           N  
ANISOU 1774  N   GLU A1081     3178   3191   1782   -855    498   -299       N  
ATOM   1775  CA  GLU A1081      35.792 105.942  12.053  1.00 25.64           C  
ANISOU 1775  CA  GLU A1081     3862   3558   2322   -309    594   -463       C  
ATOM   1776  C   GLU A1081      36.199 105.407  13.421  1.00 23.60           C  
ANISOU 1776  C   GLU A1081     3706   3320   1941   -688    649   -452       C  
ATOM   1777  O   GLU A1081      36.429 106.184  14.354  1.00 23.53           O  
ANISOU 1777  O   GLU A1081     3714   3342   1885   -683    409   -768       O  
ATOM   1778  CB  GLU A1081      34.271 105.983  11.916  1.00 32.26           C  
ANISOU 1778  CB  GLU A1081     4733   4078   3445     35   1095   -249       C  
ATOM   1779  CG  GLU A1081      33.598 107.010  12.819  1.00 43.20           C  
ANISOU 1779  CG  GLU A1081     6974   4637   4803    368    821    257       C  
ATOM   1780  CD  GLU A1081      32.127 107.194  12.478  1.00 54.22           C  
ANISOU 1780  CD  GLU A1081     9337   5110   6154    433    723    709       C  
ATOM   1781  OE1 GLU A1081      31.656 108.355  12.481  1.00 57.41           O  
ANISOU 1781  OE1 GLU A1081    10079   5211   6523    916    777    879       O  
ATOM   1782  OE2 GLU A1081      31.447 106.185  12.207  1.00 57.67           O  
ANISOU 1782  OE2 GLU A1081     9728   5398   6785     14    751    864       O  
ATOM   1783  N   LYS A1082      36.284 104.082  13.568  1.00 22.82           N  
ANISOU 1783  N   LYS A1082     3785   3150   1737   -951    681   -192       N  
ATOM   1784  CA  LYS A1082      36.673 103.512  14.856  1.00 24.11           C  
ANISOU 1784  CA  LYS A1082     4273   3141   1748  -1600    544    -69       C  
ATOM   1785  C   LYS A1082      38.121 103.842  15.193  1.00 23.01           C  
ANISOU 1785  C   LYS A1082     4100   3221   1420   -917    210    -66       C  
ATOM   1786  O   LYS A1082      38.443 104.140  16.349  1.00 24.94           O  
ANISOU 1786  O   LYS A1082     4602   3490   1385   -891    442   -364       O  
ATOM   1787  CB  LYS A1082      36.447 102.000  14.862  1.00 28.02           C  
ANISOU 1787  CB  LYS A1082     5365   3140   2141  -1651    530    -91       C  
ATOM   1788  CG  LYS A1082      36.823 101.337  16.179  1.00 32.71           C  
ANISOU 1788  CG  LYS A1082     6498   3408   2523  -1334     32    105       C  
ATOM   1789  CD  LYS A1082      36.435  99.867  16.223  1.00 37.40           C  
ANISOU 1789  CD  LYS A1082     7639   3833   2739   -927   -180    501       C  
ATOM   1790  CE  LYS A1082      36.557  99.319  17.639  1.00 38.82           C  
ANISOU 1790  CE  LYS A1082     7953   4090   2705   -864   -425    779       C  
ATOM   1791  NZ  LYS A1082      37.893  99.609  18.232  1.00 39.31           N  
ANISOU 1791  NZ  LYS A1082     8031   4214   2692   -879   -383   1118       N  
ATOM   1792  N   GLU A1083      39.009 103.794  14.197  1.00 21.27           N  
ANISOU 1792  N   GLU A1083     4002   2849   1231   -314    -62   -106       N  
ATOM   1793  CA  GLU A1083      40.407 104.135  14.438  1.00 20.68           C  
ANISOU 1793  CA  GLU A1083     3838   2680   1340   -280    189   -229       C  
ATOM   1794  C   GLU A1083      40.553 105.593  14.856  1.00 19.55           C  
ANISOU 1794  C   GLU A1083     3504   2548   1376   -262   -118   -195       C  
ATOM   1795  O   GLU A1083      41.404 105.927  15.689  1.00 21.38           O  
ANISOU 1795  O   GLU A1083     3920   2577   1626   -108    -97     32       O  
ATOM   1796  CB  GLU A1083      41.241 103.841  13.191  1.00 19.57           C  
ANISOU 1796  CB  GLU A1083     3518   2618   1301    -49    832   -249       C  
ATOM   1797  CG  GLU A1083      41.404 102.359  12.885  1.00 22.05           C  
ANISOU 1797  CG  GLU A1083     4393   2515   1469    -11    526   -397       C  
ATOM   1798  CD  GLU A1083      42.011 102.110  11.519  1.00 24.05           C  
ANISOU 1798  CD  GLU A1083     4678   2442   2017     32    211   -187       C  
ATOM   1799  OE1 GLU A1083      41.824 102.957  10.621  1.00 23.54           O  
ANISOU 1799  OE1 GLU A1083     4318   2651   1974   -540   -431   -336       O  
ATOM   1800  OE2 GLU A1083      42.678 101.069  11.342  1.00 25.89           O  
ANISOU 1800  OE2 GLU A1083     5327   2334   2176    921   -116     22       O  
ATOM   1801  N   ILE A1084      39.718 106.472  14.298  1.00 16.95           N  
ANISOU 1801  N   ILE A1084     3127   2350    963   -124    182     21       N  
ATOM   1802  CA  ILE A1084      39.788 107.887  14.648  1.00 18.97           C  
ANISOU 1802  CA  ILE A1084     3659   2515   1033    -77    500    -70       C  
ATOM   1803  C   ILE A1084      39.263 108.122  16.063  1.00 21.23           C  
ANISOU 1803  C   ILE A1084     4139   2685   1243   -412    576   -324       C  
ATOM   1804  O   ILE A1084      39.858 108.878  16.839  1.00 21.41           O  
ANISOU 1804  O   ILE A1084     3891   2712   1532   -682    385   -362       O  
ATOM   1805  CB  ILE A1084      39.074 108.746  13.587  1.00 19.00           C  
ANISOU 1805  CB  ILE A1084     3551   2662   1007    -36    215   -166       C  
ATOM   1806  CG1 ILE A1084      39.765 108.591  12.231  1.00 17.97           C  
ANISOU 1806  CG1 ILE A1084     3220   2662    945   -509    235    207       C  
ATOM   1807  CG2 ILE A1084      39.089 110.212  13.985  1.00 19.89           C  
ANISOU 1807  CG2 ILE A1084     3678   2715   1163    281   -544   -225       C  
ATOM   1808  CD1 ILE A1084      39.007 109.214  11.077  1.00 20.59           C  
ANISOU 1808  CD1 ILE A1084     3844   2880   1101   -283   -422    246       C  
ATOM   1809  N   LYS A1085      38.155 107.470  16.430  1.00 22.65           N  
ANISOU 1809  N   LYS A1085     4110   3123   1372   -178    902    -43       N  
ATOM   1810  CA  LYS A1085      37.663 107.585  17.801  1.00 24.84           C  
ANISOU 1810  CA  LYS A1085     4481   3477   1478   -300    606    -73       C  
ATOM   1811  C   LYS A1085      38.687 107.061  18.801  1.00 25.20           C  
ANISOU 1811  C   LYS A1085     4982   3215   1377   -406    515    152       C  
ATOM   1812  O   LYS A1085      38.884 107.654  19.868  1.00 24.41           O  
ANISOU 1812  O   LYS A1085     4821   3040   1412  -1002    486      3       O  
ATOM   1813  CB  LYS A1085      36.329 106.857  17.950  1.00 29.38           C  
ANISOU 1813  CB  LYS A1085     5072   3993   2098    247    872    124       C  
ATOM   1814  CG  LYS A1085      35.203 107.525  17.204  1.00 34.92           C  
ANISOU 1814  CG  LYS A1085     6019   4490   2758    233    865    152       C  
ATOM   1815  CD  LYS A1085      34.196 108.136  18.156  1.00 37.73           C  
ANISOU 1815  CD  LYS A1085     6232   4862   3239    351    902    113       C  
ATOM   1816  CE  LYS A1085      33.258 109.071  17.405  1.00 40.50           C  
ANISOU 1816  CE  LYS A1085     7105   4975   3307    390    316    -54       C  
ATOM   1817  NZ  LYS A1085      32.672 108.456  16.169  1.00 40.42           N  
ANISOU 1817  NZ  LYS A1085     6728   5039   3590    337    201   -303       N  
ATOM   1818  N   ASP A1086      39.364 105.962  18.464  1.00 25.24           N  
ANISOU 1818  N   ASP A1086     5097   3214   1280   -145     42     71       N  
ATOM   1819  CA  ASP A1086      40.359 105.407  19.377  1.00 28.35           C  
ANISOU 1819  CA  ASP A1086     6085   3152   1537   -302   -169     18       C  
ATOM   1820  C   ASP A1086      41.559 106.336  19.519  1.00 26.88           C  
ANISOU 1820  C   ASP A1086     5582   3191   1442   -456   -289     59       C  
ATOM   1821  O   ASP A1086      42.079 106.522  20.626  1.00 30.12           O  
ANISOU 1821  O   ASP A1086     6319   3523   1603   -371   -190     72       O  
ATOM   1822  CB  ASP A1086      40.779 104.015  18.908  1.00 31.93           C  
ANISOU 1822  CB  ASP A1086     7198   3053   1882   -600   -219   -188       C  
ATOM   1823  CG  ASP A1086      39.655 103.001  19.023  1.00 36.36           C  
ANISOU 1823  CG  ASP A1086     8343   3173   2299   -419     45   -466       C  
ATOM   1824  OD1 ASP A1086      38.682 103.267  19.762  1.00 39.03           O  
ANISOU 1824  OD1 ASP A1086     8928   3336   2564   -519    475   -573       O  
ATOM   1825  OD2 ASP A1086      39.745 101.935  18.380  1.00 35.68           O  
ANISOU 1825  OD2 ASP A1086     8301   2861   2394   -491    -84   -468       O  
ATOM   1826  N   LEU A1087      42.007 106.934  18.413  1.00 23.96           N  
ANISOU 1826  N   LEU A1087     4929   2913   1262   -330    184     74       N  
ATOM   1827  CA  LEU A1087      43.074 107.927  18.491  1.00 25.37           C  
ANISOU 1827  CA  LEU A1087     5309   2909   1423    -84    237    166       C  
ATOM   1828  C   LEU A1087      42.655 109.114  19.348  1.00 23.38           C  
ANISOU 1828  C   LEU A1087     4949   2592   1343   -696    413    -64       C  
ATOM   1829  O   LEU A1087      43.455 109.640  20.130  1.00 24.03           O  
ANISOU 1829  O   LEU A1087     5255   2410   1467   -502     48   -236       O  
ATOM   1830  CB  LEU A1087      43.456 108.395  17.087  1.00 25.84           C  
ANISOU 1830  CB  LEU A1087     4958   3380   1479    268    604     71       C  
ATOM   1831  CG  LEU A1087      44.452 107.543  16.300  1.00 27.92           C  
ANISOU 1831  CG  LEU A1087     4509   4030   2069    -77    131    326       C  
ATOM   1832  CD1 LEU A1087      44.588 108.066  14.878  1.00 29.15           C  
ANISOU 1832  CD1 LEU A1087     4414   4288   2373   -257   -285    295       C  
ATOM   1833  CD2 LEU A1087      45.803 107.522  16.996  1.00 28.31           C  
ANISOU 1833  CD2 LEU A1087     4018   4305   2435   -256   -227    357       C  
ATOM   1834  N   TYR A1088      41.398 109.545  19.216  1.00 21.03           N  
ANISOU 1834  N   TYR A1088     4289   2539   1164   -412    192   -293       N  
ATOM   1835  CA  TYR A1088      40.912 110.681  19.993  1.00 18.92           C  
ANISOU 1835  CA  TYR A1088     3628   2511   1049   -647    215   -291       C  
ATOM   1836  C   TYR A1088      40.895 110.364  21.483  1.00 20.98           C  
ANISOU 1836  C   TYR A1088     4191   2611   1168   -720    353    -96       C  
ATOM   1837  O   TYR A1088      41.182 111.233  22.314  1.00 25.72           O  
ANISOU 1837  O   TYR A1088     5282   3140   1352   -385     97   -153       O  
ATOM   1838  CB  TYR A1088      39.521 111.081  19.498  1.00 17.45           C  
ANISOU 1838  CB  TYR A1088     3083   2614    932   -660    101   -261       C  
ATOM   1839  CG  TYR A1088      38.880 112.221  20.256  1.00 19.24           C  
ANISOU 1839  CG  TYR A1088     3431   2783   1095   -716    465   -254       C  
ATOM   1840  CD1 TYR A1088      39.534 113.436  20.410  1.00 21.43           C  
ANISOU 1840  CD1 TYR A1088     4070   2914   1158   -555     25   -382       C  
ATOM   1841  CD2 TYR A1088      37.610 112.087  20.801  1.00 20.66           C  
ANISOU 1841  CD2 TYR A1088     3491   2988   1370   -779    779   -486       C  
ATOM   1842  CE1 TYR A1088      38.946 114.482  21.097  1.00 21.34           C  
ANISOU 1842  CE1 TYR A1088     3783   3017   1306   -545    268   -268       C  
ATOM   1843  CE2 TYR A1088      37.014 113.127  21.489  1.00 22.71           C  
ANISOU 1843  CE2 TYR A1088     3705   3105   1819   -947    595   -561       C  
ATOM   1844  CZ  TYR A1088      37.686 114.321  21.633  1.00 24.34           C  
ANISOU 1844  CZ  TYR A1088     4215   3230   1803   -509    125   -458       C  
ATOM   1845  OH  TYR A1088      37.095 115.359  22.317  1.00 26.46           O  
ANISOU 1845  OH  TYR A1088     4359   3546   2148   -575    486   -612       O  
ATOM   1846  N   ASP A1089      40.572 109.119  21.841  1.00 24.39           N  
ANISOU 1846  N   ASP A1089     5159   2638   1468  -1345    311    -89       N  
ATOM   1847  CA  ASP A1089      40.543 108.731  23.247  1.00 25.74           C  
ANISOU 1847  CA  ASP A1089     5366   2883   1533  -1518     98     44       C  
ATOM   1848  C   ASP A1089      41.945 108.496  23.798  1.00 29.27           C  
ANISOU 1848  C   ASP A1089     6187   3249   1683  -1327   -171     13       C  
ATOM   1849  O   ASP A1089      42.246 108.902  24.927  1.00 32.11           O  
ANISOU 1849  O   ASP A1089     7037   3200   1962  -1263   -522    -87       O  
ATOM   1850  CB  ASP A1089      39.676 107.484  23.435  1.00 30.44           C  
ANISOU 1850  CB  ASP A1089     6624   3155   1786  -1432     35     17       C  
ATOM   1851  CG  ASP A1089      38.222 107.721  23.071  1.00 34.31           C  
ANISOU 1851  CG  ASP A1089     7504   3483   2048  -1630    301   -164       C  
ATOM   1852  OD1 ASP A1089      37.786 108.891  23.088  1.00 37.10           O  
ANISOU 1852  OD1 ASP A1089     8077   3801   2218  -1357    510   -358       O  
ATOM   1853  OD2 ASP A1089      37.513 106.737  22.774  1.00 37.49           O  
ANISOU 1853  OD2 ASP A1089     8195   3831   2220  -1436    549   -167       O  
ATOM   1854  N   ASN A1090      42.814 107.843  23.020  1.00 31.83           N  
ANISOU 1854  N   ASN A1090     6630   3575   1890  -1424   -422    363       N  
ATOM   1855  CA  ASN A1090      44.156 107.530  23.505  1.00 34.42           C  
ANISOU 1855  CA  ASN A1090     6919   3764   2395  -1151   -373   1013       C  
ATOM   1856  C   ASN A1090      44.972 108.795  23.743  1.00 31.71           C  
ANISOU 1856  C   ASN A1090     6078   3628   2343  -1007   -931   1084       C  
ATOM   1857  O   ASN A1090      45.697 108.896  24.740  1.00 37.09           O  
ANISOU 1857  O   ASN A1090     7157   3995   2939  -1050  -1228   1330       O  
ATOM   1858  CB  ASN A1090      44.872 106.608  22.518  1.00 40.07           C  
ANISOU 1858  CB  ASN A1090     8145   4150   2930   -821    181   1171       C  
ATOM   1859  CG  ASN A1090      44.173 105.273  22.353  1.00 46.11           C  
ANISOU 1859  CG  ASN A1090     9499   4697   3324   -222    452   1171       C  
ATOM   1860  OD1 ASN A1090      43.485 104.803  23.259  1.00 48.64           O  
ANISOU 1860  OD1 ASN A1090    10110   4765   3605   -210    565   1491       O  
ATOM   1861  ND2 ASN A1090      44.346 104.654  21.190  1.00 48.65           N  
ANISOU 1861  ND2 ASN A1090     9737   5017   3731    109    677    837       N  
ATOM   1862  N   GLN A1091      44.866 109.769  22.843  1.00 26.08           N  
ANISOU 1862  N   GLN A1091     4854   3407   1647   -489   -494    836       N  
ATOM   1863  CA  GLN A1091      45.636 111.003  22.939  1.00 23.67           C  
ANISOU 1863  CA  GLN A1091     4307   3213   1475   -585   -452    185       C  
ATOM   1864  C   GLN A1091      44.979 112.056  23.823  1.00 26.91           C  
ANISOU 1864  C   GLN A1091     5272   3309   1645   -416   -231     88       C  
ATOM   1865  O   GLN A1091      45.526 113.155  23.961  1.00 25.46           O  
ANISOU 1865  O   GLN A1091     5025   2943   1704  -1006   -147   -118       O  
ATOM   1866  CB  GLN A1091      45.894 111.578  21.541  1.00 23.55           C  
ANISOU 1866  CB  GLN A1091     4450   3089   1409   -472   -142    -37       C  
ATOM   1867  CG  GLN A1091      46.687 110.652  20.631  1.00 21.46           C  
ANISOU 1867  CG  GLN A1091     3759   3071   1323   -238    110    -78       C  
ATOM   1868  CD  GLN A1091      46.935 111.248  19.260  1.00 22.05           C  
ANISOU 1868  CD  GLN A1091     4167   2950   1260     82   -324   -345       C  
ATOM   1869  OE1 GLN A1091      46.416 112.314  18.929  1.00 23.59           O  
ANISOU 1869  OE1 GLN A1091     4839   2800   1326   -132    218   -378       O  
ATOM   1870  NE2 GLN A1091      47.736 110.562  18.453  1.00 23.94           N  
ANISOU 1870  NE2 GLN A1091     4466   2988   1640    370   -689   -120       N  
ATOM   1871  N   SER A1092      43.829 111.751  24.427  1.00 28.31           N  
ANISOU 1871  N   SER A1092     5734   3465   1557   -651   -237     42       N  
ATOM   1872  CA  SER A1092      43.151 112.720  25.278  1.00 29.29           C  
ANISOU 1872  CA  SER A1092     6120   3461   1549   -418    -35    -65       C  
ATOM   1873  C   SER A1092      43.736 112.793  26.681  1.00 30.04           C  
ANISOU 1873  C   SER A1092     6463   3315   1636   -196     46    167       C  
ATOM   1874  O   SER A1092      43.474 113.770  27.392  1.00 30.81           O  
ANISOU 1874  O   SER A1092     6675   3340   1693    106   -210   -147       O  
ATOM   1875  CB  SER A1092      41.655 112.404  25.362  1.00 30.69           C  
ANISOU 1875  CB  SER A1092     6355   3590   1714  -1004    202   -272       C  
ATOM   1876  OG  SER A1092      41.011 112.639  24.123  1.00 33.43           O  
ANISOU 1876  OG  SER A1092     6955   3753   1992   -988   -282     72       O  
ATOM   1877  N   ASN A1093      44.519 111.796  27.091  1.00 30.55           N  
ANISOU 1877  N   ASN A1093     6726   2930   1951   -124    478    500       N  
ATOM   1878  CA  ASN A1093      45.074 111.721  28.442  1.00 32.96           C  
ANISOU 1878  CA  ASN A1093     7323   3044   2157   -383    391    550       C  
ATOM   1879  C   ASN A1093      43.962 111.810  29.490  1.00 32.66           C  
ANISOU 1879  C   ASN A1093     7624   2814   1972   -489    158    189       C  
ATOM   1880  O   ASN A1093      43.930 112.703  30.338  1.00 33.80           O  
ANISOU 1880  O   ASN A1093     7816   2944   2084   -249    765     11       O  
ATOM   1881  CB  ASN A1093      46.162 112.776  28.667  1.00 36.52           C  
ANISOU 1881  CB  ASN A1093     7814   3498   2563   -538    770    756       C  
ATOM   1882  CG  ASN A1093      47.222 112.762  27.581  1.00 42.34           C  
ANISOU 1882  CG  ASN A1093     8818   4000   3268   -649    925   1050       C  
ATOM   1883  OD1 ASN A1093      47.527 113.794  26.982  1.00 45.32           O  
ANISOU 1883  OD1 ASN A1093     9332   4424   3465   -670    777   1044       O  
ATOM   1884  ND2 ASN A1093      47.786 111.589  27.320  1.00 44.29           N  
ANISOU 1884  ND2 ASN A1093     8968   4238   3623   -541   1314   1163       N  
ATOM   1885  N   SER A1094      43.040 110.847  29.410  1.00 31.98           N  
ANISOU 1885  N   SER A1094     7429   2805   1917   -938    -86    110       N  
ATOM   1886  CA  SER A1094      41.823 110.888  30.214  1.00 31.41           C  
ANISOU 1886  CA  SER A1094     6950   2804   2182   -909   -858   -278       C  
ATOM   1887  C   SER A1094      42.090 110.780  31.711  1.00 32.27           C  
ANISOU 1887  C   SER A1094     7362   2790   2110   -615   -723   -252       C  
ATOM   1888  O   SER A1094      41.227 111.164  32.507  1.00 33.82           O  
ANISOU 1888  O   SER A1094     7620   3128   2102   -561   -430   -359       O  
ATOM   1889  CB  SER A1094      40.855 109.791  29.766  1.00 35.69           C  
ANISOU 1889  CB  SER A1094     7815   3012   2732  -1321   -840   -402       C  
ATOM   1890  OG  SER A1094      41.457 108.512  29.858  1.00 40.07           O  
ANISOU 1890  OG  SER A1094     8756   3346   3123  -1447   -914   -499       O  
ATOM   1891  N   GLY A1095      43.251 110.268  32.113  1.00 29.47           N  
ANISOU 1891  N   GLY A1095     6550   2631   2017   -471   -962   -246       N  
ATOM   1892  CA  GLY A1095      43.589 110.216  33.522  1.00 25.43           C  
ANISOU 1892  CA  GLY A1095     5299   2655   1708   -268   -918   -309       C  
ATOM   1893  C   GLY A1095      43.938 111.550  34.143  1.00 22.02           C  
ANISOU 1893  C   GLY A1095     4591   2462   1312     32   -656    -98       C  
ATOM   1894  O   GLY A1095      44.173 111.613  35.354  1.00 19.60           O  
ANISOU 1894  O   GLY A1095     4045   2290   1112     14   -489     38       O  
ATOM   1895  N   ILE A1096      43.971 112.617  33.349  1.00 22.76           N  
ANISOU 1895  N   ILE A1096     4852   2416   1380   -128   -636   -150       N  
ATOM   1896  CA  ILE A1096      44.344 113.949  33.806  1.00 17.83           C  
ANISOU 1896  CA  ILE A1096     3393   2465    918   -361   -171   -174       C  
ATOM   1897  C   ILE A1096      43.183 114.890  33.522  1.00 18.72           C  
ANISOU 1897  C   ILE A1096     3625   2534    956   -213    293     -3       C  
ATOM   1898  O   ILE A1096      42.675 114.933  32.395  1.00 22.42           O  
ANISOU 1898  O   ILE A1096     4414   2989   1115     51    -92    120       O  
ATOM   1899  CB  ILE A1096      45.621 114.438  33.100  1.00 20.95           C  
ANISOU 1899  CB  ILE A1096     3855   2594   1510   -521   -638   -209       C  
ATOM   1900  CG1 ILE A1096      46.830 113.605  33.537  1.00 21.19           C  
ANISOU 1900  CG1 ILE A1096     3665   2647   1741   -370   -227   -359       C  
ATOM   1901  CG2 ILE A1096      45.842 115.915  33.362  1.00 22.29           C  
ANISOU 1901  CG2 ILE A1096     4013   2744   1712   -824   -254   -234       C  
ATOM   1902  CD1 ILE A1096      48.103 113.935  32.786  1.00 24.31           C  
ANISOU 1902  CD1 ILE A1096     4584   2578   2075    -85   -346   -320       C  
ATOM   1903  N   LEU A1097      42.763 115.639  34.539  1.00 16.79           N  
ANISOU 1903  N   LEU A1097     3348   2192    838    -71     -4    -11       N  
ATOM   1904  CA  LEU A1097      41.711 116.626  34.342  1.00 18.63           C  
ANISOU 1904  CA  LEU A1097     3831   2232   1015    -44    327    111       C  
ATOM   1905  C   LEU A1097      42.230 117.796  33.515  1.00 15.52           C  
ANISOU 1905  C   LEU A1097     2891   2195    810   -193    296    171       C  
ATOM   1906  O   LEU A1097      43.417 118.132  33.544  1.00 16.17           O  
ANISOU 1906  O   LEU A1097     2906   2438    800    151    -67   -134       O  
ATOM   1907  CB  LEU A1097      41.187 117.138  35.684  1.00 18.17           C  
ANISOU 1907  CB  LEU A1097     3465   2147   1292   -307    757    304       C  
ATOM   1908  CG  LEU A1097      40.123 116.290  36.384  1.00 24.95           C  
ANISOU 1908  CG  LEU A1097     4985   2621   1874   -812    403    268       C  
ATOM   1909  CD1 LEU A1097      40.757 115.113  37.094  1.00 25.50           C  
ANISOU 1909  CD1 LEU A1097     4628   2774   2288   -645     57    396       C  
ATOM   1910  CD2 LEU A1097      39.330 117.133  37.367  1.00 27.91           C  
ANISOU 1910  CD2 LEU A1097     5674   2844   2087  -1026    630    248       C  
ATOM   1911  N   LYS A1098      41.321 118.419  32.771  1.00 15.99           N  
ANISOU 1911  N   LYS A1098     2826   2524    726    125     -4    119       N  
ATOM   1912  CA  LYS A1098      41.659 119.515  31.879  1.00 15.85           C  
ANISOU 1912  CA  LYS A1098     2771   2508    743    234     28    160       C  
ATOM   1913  C   LYS A1098      40.935 120.782  32.312  1.00 15.61           C  
ANISOU 1913  C   LYS A1098     2471   2616    845    -63    533    215       C  
ATOM   1914  O   LYS A1098      39.861 120.726  32.918  1.00 16.31           O  
ANISOU 1914  O   LYS A1098     2851   2553    795    -18    243    293       O  
ATOM   1915  CB  LYS A1098      41.258 119.192  30.434  1.00 21.56           C  
ANISOU 1915  CB  LYS A1098     4365   2647   1180    643   -295    -97       C  
ATOM   1916  CG  LYS A1098      41.711 117.828  29.940  1.00 24.09           C  
ANISOU 1916  CG  LYS A1098     4773   3024   1356    969     39   -271       C  
ATOM   1917  CD  LYS A1098      43.221 117.683  30.002  1.00 22.32           C  
ANISOU 1917  CD  LYS A1098     4002   3150   1330    858    472   -305       C  
ATOM   1918  CE  LYS A1098      43.677 116.416  29.297  1.00 24.33           C  
ANISOU 1918  CE  LYS A1098     4738   3197   1311    619    326   -204       C  
ATOM   1919  NZ  LYS A1098      42.977 115.206  29.812  1.00 26.63           N  
ANISOU 1919  NZ  LYS A1098     5484   3188   1446    806   -133   -121       N  
ATOM   1920  N   ASP A1099      41.531 121.928  31.994  1.00 17.30           N  
ANISOU 1920  N   ASP A1099     3277   2410    886    -63    119    301       N  
ATOM   1921  CA  ASP A1099      40.852 123.203  32.178  1.00 15.30           C  
ANISOU 1921  CA  ASP A1099     2462   2544    805   -223   -260    103       C  
ATOM   1922  C   ASP A1099      39.946 123.468  30.975  1.00 14.74           C  
ANISOU 1922  C   ASP A1099     2334   2240   1026   -564   -645    133       C  
ATOM   1923  O   ASP A1099      39.792 122.627  30.085  1.00 15.23           O  
ANISOU 1923  O   ASP A1099     3098   1863    826   -425   -170     74       O  
ATOM   1924  CB  ASP A1099      41.845 124.325  32.489  1.00 14.85           C  
ANISOU 1924  CB  ASP A1099     1930   2934    777    281    168     45       C  
ATOM   1925  CG  ASP A1099      42.839 124.582  31.361  1.00 15.27           C  
ANISOU 1925  CG  ASP A1099     2001   3026    775     15      8    183       C  
ATOM   1926  OD1 ASP A1099      42.564 124.224  30.196  1.00 14.83           O  
ANISOU 1926  OD1 ASP A1099     2268   2631    737    130    310    104       O  
ATOM   1927  OD2 ASP A1099      43.904 125.169  31.647  1.00 15.04           O  
ANISOU 1927  OD2 ASP A1099     1967   2982    765   -162     82    106       O  
ATOM   1928  N   PHE A1100      39.347 124.660  30.932  1.00 14.24           N  
ANISOU 1928  N   PHE A1100     2422   2300    689    208   -116    229       N  
ATOM   1929  CA  PHE A1100      38.407 124.984  29.862  1.00 14.64           C  
ANISOU 1929  CA  PHE A1100     2402   2447    714    409     80     43       C  
ATOM   1930  C   PHE A1100      39.082 124.952  28.496  1.00 14.59           C  
ANISOU 1930  C   PHE A1100     2604   2240    701    158    168   -160       C  
ATOM   1931  O   PHE A1100      38.469 124.543  27.502  1.00 16.09           O  
ANISOU 1931  O   PHE A1100     3017   2334    761    -80     57    -70       O  
ATOM   1932  CB  PHE A1100      37.781 126.352  30.127  1.00 16.07           C  
ANISOU 1932  CB  PHE A1100     2480   2702    925    786    293    -43       C  
ATOM   1933  CG  PHE A1100      36.800 126.789  29.077  1.00 15.16           C  
ANISOU 1933  CG  PHE A1100     2083   2911    766    344     22    115       C  
ATOM   1934  CD1 PHE A1100      35.499 126.315  29.084  1.00 17.45           C  
ANISOU 1934  CD1 PHE A1100     2725   3101    806     15      1    237       C  
ATOM   1935  CD2 PHE A1100      37.175 127.687  28.090  1.00 17.51           C  
ANISOU 1935  CD2 PHE A1100     2728   3103    823    288    -83     88       C  
ATOM   1936  CE1 PHE A1100      34.592 126.720  28.122  1.00 17.47           C  
ANISOU 1936  CE1 PHE A1100     2586   3202    848    -43     42    295       C  
ATOM   1937  CE2 PHE A1100      36.274 128.096  27.126  1.00 16.79           C  
ANISOU 1937  CE2 PHE A1100     2606   3002    772    132     56    137       C  
ATOM   1938  CZ  PHE A1100      34.981 127.612  27.141  1.00 15.21           C  
ANISOU 1938  CZ  PHE A1100     1921   3004    853    197    291    213       C  
ATOM   1939  N   TRP A1101      40.346 125.369  28.426  1.00 14.05           N  
ANISOU 1939  N   TRP A1101     2496   2112    730    -32    290   -264       N  
ATOM   1940  CA  TRP A1101      41.053 125.437  27.153  1.00 16.08           C  
ANISOU 1940  CA  TRP A1101     3117   2146    848    -29    301    162       C  
ATOM   1941  C   TRP A1101      41.598 124.090  26.694  1.00 15.33           C  
ANISOU 1941  C   TRP A1101     2994   2025    805   -103    -29    262       C  
ATOM   1942  O   TRP A1101      42.033 123.979  25.543  1.00 13.82           O  
ANISOU 1942  O   TRP A1101     2610   1947    693   -101    -26    163       O  
ATOM   1943  CB  TRP A1101      42.196 126.453  27.235  1.00 14.98           C  
ANISOU 1943  CB  TRP A1101     2646   2051    994     63    -91    185       C  
ATOM   1944  CG  TRP A1101      41.792 127.768  27.830  1.00 14.19           C  
ANISOU 1944  CG  TRP A1101     2801   1853    737   -356     -8     62       C  
ATOM   1945  CD1 TRP A1101      42.247 128.314  28.995  1.00 13.78           C  
ANISOU 1945  CD1 TRP A1101     2570   1720    946   -186    201    224       C  
ATOM   1946  CD2 TRP A1101      40.841 128.698  27.296  1.00 13.31           C  
ANISOU 1946  CD2 TRP A1101     2606   1756    695   -165    128   -158       C  
ATOM   1947  NE1 TRP A1101      41.645 129.528  29.216  1.00 13.40           N  
ANISOU 1947  NE1 TRP A1101     2644   1413   1033    233    334    309       N  
ATOM   1948  CE2 TRP A1101      40.777 129.787  28.188  1.00 13.13           C  
ANISOU 1948  CE2 TRP A1101     2651   1635    702    279     28   -135       C  
ATOM   1949  CE3 TRP A1101      40.041 128.717  26.149  1.00 13.79           C  
ANISOU 1949  CE3 TRP A1101     2642   1860    737    129    -23   -290       C  
ATOM   1950  CZ2 TRP A1101      39.945 130.883  27.969  1.00 15.38           C  
ANISOU 1950  CZ2 TRP A1101     2886   2031    926   -237    546   -174       C  
ATOM   1951  CZ3 TRP A1101      39.215 129.806  25.934  1.00 14.56           C  
ANISOU 1951  CZ3 TRP A1101     2608   2134    792   -244    116   -279       C  
ATOM   1952  CH2 TRP A1101      39.174 130.874  26.839  1.00 14.62           C  
ANISOU 1952  CH2 TRP A1101     2687   2041    828   -284    425   -182       C  
ATOM   1953  N   GLY A1102      41.589 123.074  27.553  1.00 14.35           N  
ANISOU 1953  N   GLY A1102     2512   2190    751    153    399    -59       N  
ATOM   1954  CA  GLY A1102      42.124 121.775  27.208  1.00 14.99           C  
ANISOU 1954  CA  GLY A1102     2834   2055    807    665    -77    -12       C  
ATOM   1955  C   GLY A1102      43.497 121.475  27.766  1.00 17.74           C  
ANISOU 1955  C   GLY A1102     3621   2146    974    211   -311    121       C  
ATOM   1956  O   GLY A1102      43.992 120.358  27.576  1.00 16.70           O  
ANISOU 1956  O   GLY A1102     3390   2090    865    -61   -162    -65       O  
ATOM   1957  N   ASP A1103      44.131 122.434  28.437  1.00 16.43           N  
ANISOU 1957  N   ASP A1103     3258   2131    853    361     39    119       N  
ATOM   1958  CA  ASP A1103      45.403 122.185  29.091  1.00 15.32           C  
ANISOU 1958  CA  ASP A1103     2710   2331    779     -9    329    234       C  
ATOM   1959  C   ASP A1103      45.181 121.411  30.388  1.00 14.16           C  
ANISOU 1959  C   ASP A1103     2213   2408    759   -221    224    351       C  
ATOM   1960  O   ASP A1103      44.056 121.267  30.872  1.00 15.92           O  
ANISOU 1960  O   ASP A1103     2543   2605    902     67    438    426       O  
ATOM   1961  CB  ASP A1103      46.118 123.502  29.389  1.00 15.19           C  
ANISOU 1961  CB  ASP A1103     2657   2325    789    -55    270    353       C  
ATOM   1962  CG  ASP A1103      46.564 124.220  28.133  1.00 16.50           C  
ANISOU 1962  CG  ASP A1103     2969   2417    886     -9    502    -13       C  
ATOM   1963  OD1 ASP A1103      46.918 123.537  27.150  1.00 16.54           O  
ANISOU 1963  OD1 ASP A1103     2917   2566    801   -216    209   -194       O  
ATOM   1964  OD2 ASP A1103      46.561 125.469  28.131  1.00 19.62           O  
ANISOU 1964  OD2 ASP A1103     3699   2609   1149    420    615    -83       O  
ATOM   1965  N   TYR A1104      46.278 120.912  30.953  1.00 17.88           N  
ANISOU 1965  N   TYR A1104     3384   2517    892    233   -113   -209       N  
ATOM   1966  CA  TYR A1104      46.201 120.170  32.204  1.00 14.62           C  
ANISOU 1966  CA  TYR A1104     2284   2453    816    453    381    -12       C  
ATOM   1967  C   TYR A1104      45.684 121.067  33.321  1.00 15.88           C  
ANISOU 1967  C   TYR A1104     2696   2523    816    204    381   -187       C  
ATOM   1968  O   TYR A1104      46.153 122.196  33.496  1.00 17.78           O  
ANISOU 1968  O   TYR A1104     3269   2487   1000    307    500   -167       O  
ATOM   1969  CB  TYR A1104      47.585 119.638  32.579  1.00 16.13           C  
ANISOU 1969  CB  TYR A1104     2541   2592    995    974    388    214       C  
ATOM   1970  CG  TYR A1104      48.120 118.556  31.667  1.00 21.81           C  
ANISOU 1970  CG  TYR A1104     4160   2768   1357   1324    488     86       C  
ATOM   1971  CD1 TYR A1104      47.278 117.854  30.814  1.00 24.34           C  
ANISOU 1971  CD1 TYR A1104     4754   2944   1552   1253    486   -197       C  
ATOM   1972  CD2 TYR A1104      49.471 118.232  31.667  1.00 24.62           C  
ANISOU 1972  CD2 TYR A1104     4713   3119   1524   1329    263     65       C  
ATOM   1973  CE1 TYR A1104      47.769 116.861  29.983  1.00 25.74           C  
ANISOU 1973  CE1 TYR A1104     4876   3035   1870   1443    890    -49       C  
ATOM   1974  CE2 TYR A1104      49.970 117.243  30.841  1.00 24.90           C  
ANISOU 1974  CE2 TYR A1104     4670   3018   1773   1339    989    152       C  
ATOM   1975  CZ  TYR A1104      49.116 116.561  30.002  1.00 26.39           C  
ANISOU 1975  CZ  TYR A1104     4921   3015   2089   1548   1128    114       C  
ATOM   1976  OH  TYR A1104      49.611 115.576  29.178  1.00 26.89           O  
ANISOU 1976  OH  TYR A1104     4684   3153   2380   1425   1228     82       O  
ATOM   1977  N   LEU A1105      44.708 120.564  34.071  1.00 15.74           N  
ANISOU 1977  N   LEU A1105     2566   2535    879    111    535   -255       N  
ATOM   1978  CA  LEU A1105      44.251 121.257  35.266  1.00 14.14           C  
ANISOU 1978  CA  LEU A1105     2185   2391    798    317    428    147       C  
ATOM   1979  C   LEU A1105      45.343 121.201  36.327  1.00 14.98           C  
ANISOU 1979  C   LEU A1105     2552   2498    644    -10    -68     61       C  
ATOM   1980  O   LEU A1105      46.021 120.182  36.486  1.00 15.18           O  
ANISOU 1980  O   LEU A1105     2802   2215    751    296     87   -141       O  
ATOM   1981  CB  LEU A1105      42.979 120.592  35.791  1.00 14.76           C  
ANISOU 1981  CB  LEU A1105     2198   2475    933    -32    646    222       C  
ATOM   1982  CG  LEU A1105      42.146 121.357  36.820  1.00 15.27           C  
ANISOU 1982  CG  LEU A1105     2276   2695    832    344    354    227       C  
ATOM   1983  CD1 LEU A1105      41.559 122.614  36.200  1.00 17.39           C  
ANISOU 1983  CD1 LEU A1105     3025   2647    936    879     48     -9       C  
ATOM   1984  CD2 LEU A1105      41.046 120.467  37.376  1.00 16.77           C  
ANISOU 1984  CD2 LEU A1105     2220   3108   1045    -15    608    137       C  
ATOM   1985  N   GLN A1106      45.521 122.303  37.053  1.00 13.52           N  
ANISOU 1985  N   GLN A1106     2099   2372    666   -210    238     61       N  
ATOM   1986  CA  GLN A1106      46.642 122.440  37.971  1.00 16.07           C  
ANISOU 1986  CA  GLN A1106     2717   2666    724     17    177   -224       C  
ATOM   1987  C   GLN A1106      46.173 122.869  39.353  1.00 14.26           C  
ANISOU 1987  C   GLN A1106     2023   2572    822   -299   -148   -424       C  
ATOM   1988  O   GLN A1106      45.119 123.490  39.517  1.00 14.63           O  
ANISOU 1988  O   GLN A1106     2305   2522    733    -40    -36   -388       O  
ATOM   1989  CB  GLN A1106      47.666 123.463  37.466  1.00 17.58           C  
ANISOU 1989  CB  GLN A1106     2763   3026    891    304    322    236       C  
ATOM   1990  CG  GLN A1106      48.473 123.012  36.268  1.00 19.06           C  
ANISOU 1990  CG  GLN A1106     2519   3480   1243   -232    647    399       C  
ATOM   1991  CD  GLN A1106      49.641 123.935  35.990  1.00 26.85           C  
ANISOU 1991  CD  GLN A1106     4046   4223   1934    224    763    654       C  
ATOM   1992  OE1 GLN A1106      49.721 124.548  34.927  1.00 29.28           O  
ANISOU 1992  OE1 GLN A1106     4560   4125   2439    336    320    849       O  
ATOM   1993  NE2 GLN A1106      50.551 124.043  36.951  1.00 30.26           N  
ANISOU 1993  NE2 GLN A1106     4709   4691   2096    145    821    712       N  
ATOM   1994  N   TYR A1107      46.988 122.528  40.348  1.00 12.87           N  
ANISOU 1994  N   TYR A1107     1869   2297    725   -231    -87   -375       N  
ATOM   1995  CA  TYR A1107      46.841 123.061  41.691  1.00 13.46           C  
ANISOU 1995  CA  TYR A1107     2231   2136    749    -86   -346   -375       C  
ATOM   1996  C   TYR A1107      47.443 124.461  41.763  1.00 15.41           C  
ANISOU 1996  C   TYR A1107     2331   2442   1080   -116    136   -339       C  
ATOM   1997  O   TYR A1107      48.302 124.838  40.961  1.00 17.91           O  
ANISOU 1997  O   TYR A1107     2657   2842   1306   -249    326   -589       O  
ATOM   1998  CB  TYR A1107      47.566 122.170  42.701  1.00 14.16           C  
ANISOU 1998  CB  TYR A1107     2432   1948    999    -60   -109   -423       C  
ATOM   1999  CG  TYR A1107      46.972 120.791  42.876  1.00 13.85           C  
ANISOU 1999  CG  TYR A1107     2236   1825   1201    143    106   -355       C  
ATOM   2000  CD1 TYR A1107      45.894 120.583  43.725  1.00 15.04           C  
ANISOU 2000  CD1 TYR A1107     2361   2092   1260    327    221    120       C  
ATOM   2001  CD2 TYR A1107      47.502 119.693  42.208  1.00 13.18           C  
ANISOU 2001  CD2 TYR A1107     2150   1900    956   -255   -151   -265       C  
ATOM   2002  CE1 TYR A1107      45.351 119.325  43.896  1.00 16.42           C  
ANISOU 2002  CE1 TYR A1107     2638   2170   1433    110   -288   -142       C  
ATOM   2003  CE2 TYR A1107      46.964 118.429  42.373  1.00 16.22           C  
ANISOU 2003  CE2 TYR A1107     2717   2255   1192   -376   -136   -385       C  
ATOM   2004  CZ  TYR A1107      45.888 118.252  43.219  1.00 16.81           C  
ANISOU 2004  CZ  TYR A1107     2989   2254   1144   -187   -358   -231       C  
ATOM   2005  OH  TYR A1107      45.346 116.998  43.391  1.00 16.53           O  
ANISOU 2005  OH  TYR A1107     2576   2518   1186    -33     32   -225       O  
ATOM   2006  N   ASP A1108      46.978 125.234  42.747  1.00 13.47           N  
ANISOU 2006  N   ASP A1108     1686   2219   1212     54    291   -306       N  
ATOM   2007  CA  ASP A1108      47.519 126.566  43.030  1.00 16.58           C  
ANISOU 2007  CA  ASP A1108     2387   2626   1287   -170    -77   -199       C  
ATOM   2008  C   ASP A1108      47.429 127.493  41.818  1.00 18.39           C  
ANISOU 2008  C   ASP A1108     2802   2756   1430    -86     78    200       C  
ATOM   2009  O   ASP A1108      48.331 128.292  41.558  1.00 20.90           O  
ANISOU 2009  O   ASP A1108     3232   2967   1743   -650   -254    213       O  
ATOM   2010  CB  ASP A1108      48.949 126.498  43.574  1.00 14.89           C  
ANISOU 2010  CB  ASP A1108     1631   2704   1323    -46     57   -117       C  
ATOM   2011  CG  ASP A1108      49.056 125.653  44.827  1.00 20.29           C  
ANISOU 2011  CG  ASP A1108     3148   2842   1720    245   -294   -227       C  
ATOM   2012  OD1 ASP A1108      48.065 125.578  45.582  1.00 21.39           O  
ANISOU 2012  OD1 ASP A1108     3093   3131   1905    458   -230   -164       O  
ATOM   2013  OD2 ASP A1108      50.133 125.062  45.057  1.00 23.71           O  
ANISOU 2013  OD2 ASP A1108     4175   3018   1818    863   -597   -378       O  
ATOM   2014  N   LYS A1109      46.331 127.388  41.071  1.00 15.30           N  
ANISOU 2014  N   LYS A1109     2169   2658    986     63     44     17       N  
ATOM   2015  CA  LYS A1109      46.121 128.194  39.872  1.00 16.53           C  
ANISOU 2015  CA  LYS A1109     2967   2530    785    -39    239   -138       C  
ATOM   2016  C   LYS A1109      44.706 128.753  39.911  1.00 15.48           C  
ANISOU 2016  C   LYS A1109     2798   2058   1024    119    289   -152       C  
ATOM   2017  O   LYS A1109      43.736 127.972  39.990  1.00 17.98           O  
ANISOU 2017  O   LYS A1109     3383   2131   1319    166    299     54       O  
ATOM   2018  CB  LYS A1109      46.342 127.349  38.615  1.00 17.43           C  
ANISOU 2018  CB  LYS A1109     2958   2767    896    138    488   -118       C  
ATOM   2019  CG  LYS A1109      46.306 128.137  37.318  1.00 19.60           C  
ANISOU 2019  CG  LYS A1109     3499   2859   1087    509    140    -72       C  
ATOM   2020  CD  LYS A1109      46.768 127.282  36.150  1.00 21.92           C  
ANISOU 2020  CD  LYS A1109     3971   3258   1099    614    116   -139       C  
ATOM   2021  CE  LYS A1109      46.754 128.067  34.849  1.00 26.33           C  
ANISOU 2021  CE  LYS A1109     4734   3937   1333    806    240    -66       C  
ATOM   2022  NZ  LYS A1109      47.301 127.268  33.718  1.00 31.06           N  
ANISOU 2022  NZ  LYS A1109     5582   4339   1880    761    -35     18       N  
ATOM   2023  N   PRO A1110      44.529 130.073  39.866  1.00 15.58           N  
ANISOU 2023  N   PRO A1110     2487   1961   1472   -141    127    -31       N  
ATOM   2024  CA  PRO A1110      43.176 130.638  39.939  1.00 16.42           C  
ANISOU 2024  CA  PRO A1110     2451   2120   1667   -184   -201   -196       C  
ATOM   2025  C   PRO A1110      42.383 130.353  38.672  1.00 15.95           C  
ANISOU 2025  C   PRO A1110     2440   2234   1387     25    270     33       C  
ATOM   2026  O   PRO A1110      42.885 130.498  37.555  1.00 18.33           O  
ANISOU 2026  O   PRO A1110     3083   2099   1783   -651    275    536       O  
ATOM   2027  CB  PRO A1110      43.426 132.143  40.106  1.00 19.07           C  
ANISOU 2027  CB  PRO A1110     3269   2257   1722    -91   -569   -262       C  
ATOM   2028  CG  PRO A1110      44.857 132.259  40.550  1.00 21.04           C  
ANISOU 2028  CG  PRO A1110     3703   2286   2004   -200    137   -340       C  
ATOM   2029  CD  PRO A1110      45.566 131.117  39.897  1.00 19.07           C  
ANISOU 2029  CD  PRO A1110     3353   2044   1849   -226    171   -430       C  
ATOM   2030  N   TYR A1111      41.125 129.954  38.859  1.00 14.61           N  
ANISOU 2030  N   TYR A1111     2245   2161   1143      3     54   -189       N  
ATOM   2031  CA  TYR A1111      40.234 129.606  37.760  1.00 14.56           C  
ANISOU 2031  CA  TYR A1111     2444   2202    887    205   -159   -411       C  
ATOM   2032  C   TYR A1111      38.902 130.317  37.937  1.00 14.23           C  
ANISOU 2032  C   TYR A1111     2576   2094    734    229   -229   -226       C  
ATOM   2033  O   TYR A1111      38.342 130.325  39.038  1.00 16.05           O  
ANISOU 2033  O   TYR A1111     3484   1734    881     57    -22    -90       O  
ATOM   2034  CB  TYR A1111      39.966 128.098  37.725  1.00 14.91           C  
ANISOU 2034  CB  TYR A1111     2628   2105    933    457     86   -255       C  
ATOM   2035  CG  TYR A1111      41.148 127.246  37.329  1.00 13.54           C  
ANISOU 2035  CG  TYR A1111     2296   2040    807    418     33   -425       C  
ATOM   2036  CD1 TYR A1111      41.660 127.293  36.039  1.00 14.28           C  
ANISOU 2036  CD1 TYR A1111     2415   2194    818     78    306   -470       C  
ATOM   2037  CD2 TYR A1111      41.733 126.374  38.236  1.00 14.00           C  
ANISOU 2037  CD2 TYR A1111     2395   2207    718    176    -43   -365       C  
ATOM   2038  CE1 TYR A1111      42.734 126.508  35.670  1.00 15.56           C  
ANISOU 2038  CE1 TYR A1111     2637   2319    957    335    409   -418       C  
ATOM   2039  CE2 TYR A1111      42.808 125.585  37.876  1.00 13.67           C  
ANISOU 2039  CE2 TYR A1111     2121   2283    790    151    200   -296       C  
ATOM   2040  CZ  TYR A1111      43.304 125.656  36.592  1.00 15.52           C  
ANISOU 2040  CZ  TYR A1111     2818   2353    725    104     80   -136       C  
ATOM   2041  OH  TYR A1111      44.373 124.870  36.229  1.00 16.15           O  
ANISOU 2041  OH  TYR A1111     2930   2439    767    192    175     40       O  
ATOM   2042  N   TYR A1112      38.395 130.902  36.855  1.00 13.54           N  
ANISOU 2042  N   TYR A1112     1834   2566    743    254   -156    -63       N  
ATOM   2043  CA  TYR A1112      37.006 131.333  36.814  1.00 12.47           C  
ANISOU 2043  CA  TYR A1112     1885   2238    615   -241    140    -37       C  
ATOM   2044  C   TYR A1112      36.125 130.128  36.518  1.00 14.60           C  
ANISOU 2044  C   TYR A1112     2601   2131    814   -396    331    172       C  
ATOM   2045  O   TYR A1112      36.468 129.281  35.688  1.00 17.44           O  
ANISOU 2045  O   TYR A1112     3238   2202   1187   -194    793   -258       O  
ATOM   2046  CB  TYR A1112      36.806 132.392  35.731  1.00 13.94           C  
ANISOU 2046  CB  TYR A1112     2505   1968    825     17    -92    150       C  
ATOM   2047  CG  TYR A1112      37.529 133.694  35.991  1.00 17.47           C  
ANISOU 2047  CG  TYR A1112     3127   2149   1362      9    -83     26       C  
ATOM   2048  CD1 TYR A1112      36.990 134.652  36.841  1.00 18.01           C  
ANISOU 2048  CD1 TYR A1112     3247   2104   1492   -454    -28   -241       C  
ATOM   2049  CD2 TYR A1112      38.745 133.971  35.379  1.00 18.48           C  
ANISOU 2049  CD2 TYR A1112     3299   2144   1577   -383   -123    170       C  
ATOM   2050  CE1 TYR A1112      37.646 135.846  37.079  1.00 18.05           C  
ANISOU 2050  CE1 TYR A1112     3148   2134   1575   -483    274   -638       C  
ATOM   2051  CE2 TYR A1112      39.407 135.162  35.611  1.00 18.61           C  
ANISOU 2051  CE2 TYR A1112     3327   2041   1705   -346   -172   -109       C  
ATOM   2052  CZ  TYR A1112      38.853 136.095  36.461  1.00 19.21           C  
ANISOU 2052  CZ  TYR A1112     3418   1933   1947  -1000    164   -315       C  
ATOM   2053  OH  TYR A1112      39.509 137.282  36.694  1.00 23.48           O  
ANISOU 2053  OH  TYR A1112     4449   1899   2573   -882    338   -366       O  
ATOM   2054  N   MET A1113      34.987 130.051  37.198  1.00 15.32           N  
ANISOU 2054  N   MET A1113     2666   2360    797   -633     13     81       N  
ATOM   2055  CA  MET A1113      34.145 128.864  37.159  1.00 15.31           C  
ANISOU 2055  CA  MET A1113     2484   2523    811   -588   -216    -45       C  
ATOM   2056  C   MET A1113      32.993 129.034  36.178  1.00 17.67           C  
ANISOU 2056  C   MET A1113     3123   2706    886   -498   -205     45       C  
ATOM   2057  O   MET A1113      32.408 130.115  36.066  1.00 17.07           O  
ANISOU 2057  O   MET A1113     2821   2615   1050   -173   -383    -21       O  
ATOM   2058  CB  MET A1113      33.602 128.539  38.551  1.00 14.99           C  
ANISOU 2058  CB  MET A1113     2431   2514    751   -296    298      9       C  
ATOM   2059  CG  MET A1113      34.689 128.232  39.561  1.00 14.73           C  
ANISOU 2059  CG  MET A1113     2393   2455    747    310    304     74       C  
ATOM   2060  SD  MET A1113      35.843 126.978  38.967  1.00 16.21           S  
ANISOU 2060  SD  MET A1113     2716   2485    958   -146     45     44       S  
ATOM   2061  CE  MET A1113      34.740 125.588  38.722  1.00 19.77           C  
ANISOU 2061  CE  MET A1113     3638   2381   1492   -787   -232    124       C  
ATOM   2062  N   LEU A1114      32.674 127.951  35.473  1.00 16.11           N  
ANISOU 2062  N   LEU A1114     2187   3001    934   -684   -281    -77       N  
ATOM   2063  CA  LEU A1114      31.563 127.911  34.531  1.00 16.42           C  
ANISOU 2063  CA  LEU A1114     2457   2971    812   -200   -272   -106       C  
ATOM   2064  C   LEU A1114      30.738 126.668  34.821  1.00 13.36           C  
ANISOU 2064  C   LEU A1114     1636   2566    875   -169    239   -290       C  
ATOM   2065  O   LEU A1114      31.247 125.546  34.721  1.00 17.46           O  
ANISOU 2065  O   LEU A1114     2946   2579   1108   -206    218    -38       O  
ATOM   2066  CB  LEU A1114      32.073 127.878  33.087  1.00 16.50           C  
ANISOU 2066  CB  LEU A1114     2056   3243    970    -34   -444    -21       C  
ATOM   2067  CG  LEU A1114      31.032 127.606  31.998  1.00 20.13           C  
ANISOU 2067  CG  LEU A1114     2946   3727    975    370   -103     38       C  
ATOM   2068  CD1 LEU A1114      29.974 128.697  31.976  1.00 22.64           C  
ANISOU 2068  CD1 LEU A1114     3192   4102   1309    433   -695    -28       C  
ATOM   2069  CD2 LEU A1114      31.698 127.470  30.635  1.00 19.32           C  
ANISOU 2069  CD2 LEU A1114     2308   3894   1140     17   -469     59       C  
ATOM   2070  N   ASN A1115      29.476 126.866  35.191  1.00 13.46           N  
ANISOU 2070  N   ASN A1115     1663   2479    970   -406    293     86       N  
ATOM   2071  CA  ASN A1115      28.539 125.764  35.359  1.00 14.54           C  
ANISOU 2071  CA  ASN A1115     2063   2447   1013   -623    -58      9       C  
ATOM   2072  C   ASN A1115      27.779 125.571  34.055  1.00 16.15           C  
ANISOU 2072  C   ASN A1115     2561   2549   1026   -738   -478    -89       C  
ATOM   2073  O   ASN A1115      27.196 126.521  33.522  1.00 17.45           O  
ANISOU 2073  O   ASN A1115     2878   2668   1086    -74   -713    313       O  
ATOM   2074  CB  ASN A1115      27.563 126.056  36.499  1.00 17.60           C  
ANISOU 2074  CB  ASN A1115     2395   2753   1538    178    775    225       C  
ATOM   2075  CG  ASN A1115      26.632 124.892  36.778  1.00 19.10           C  
ANISOU 2075  CG  ASN A1115     2588   2935   1736    400    371    473       C  
ATOM   2076  OD1 ASN A1115      25.611 124.726  36.112  1.00 23.36           O  
ANISOU 2076  OD1 ASN A1115     3711   3205   1958    100   -101    854       O  
ATOM   2077  ND2 ASN A1115      26.982 124.076  37.767  1.00 17.95           N  
ANISOU 2077  ND2 ASN A1115     2235   3147   1441    637    184     24       N  
ATOM   2078  N   LEU A1116      27.783 124.340  33.545  1.00 18.35           N  
ANISOU 2078  N   LEU A1116     3020   2780   1171   -705   -542   -182       N  
ATOM   2079  CA  LEU A1116      27.272 124.088  32.204  1.00 17.73           C  
ANISOU 2079  CA  LEU A1116     2865   2821   1053   -428   -350   -358       C  
ATOM   2080  C   LEU A1116      25.750 124.109  32.112  1.00 20.54           C  
ANISOU 2080  C   LEU A1116     3530   3071   1202   -710   -381   -387       C  
ATOM   2081  O   LEU A1116      25.218 124.312  31.016  1.00 22.01           O  
ANISOU 2081  O   LEU A1116     4068   3175   1121   -325   -378   -173       O  
ATOM   2082  CB  LEU A1116      27.845 122.781  31.654  1.00 18.42           C  
ANISOU 2082  CB  LEU A1116     2727   2797   1475   -302   -144   -106       C  
ATOM   2083  CG  LEU A1116      29.348 122.850  31.377  1.00 24.21           C  
ANISOU 2083  CG  LEU A1116     4354   2987   1858   -102    536    156       C  
ATOM   2084  CD1 LEU A1116      29.898 121.483  31.020  1.00 27.14           C  
ANISOU 2084  CD1 LEU A1116     5135   3163   2012    223    811     41       C  
ATOM   2085  CD2 LEU A1116      29.638 123.857  30.272  1.00 24.91           C  
ANISOU 2085  CD2 LEU A1116     4368   3084   2011   -829    852    173       C  
ATOM   2086  N   TYR A1117      25.037 123.909  33.223  1.00 21.16           N  
ANISOU 2086  N   TYR A1117     3229   3375   1435   -466    -15   -206       N  
ATOM   2087  CA  TYR A1117      23.581 124.010  33.170  1.00 22.35           C  
ANISOU 2087  CA  TYR A1117     2789   3890   1815   -563     66    -26       C  
ATOM   2088  C   TYR A1117      23.130 125.466  33.090  1.00 23.91           C  
ANISOU 2088  C   TYR A1117     3216   3667   2202   -375   -163    -21       C  
ATOM   2089  O   TYR A1117      22.156 125.780  32.395  1.00 24.16           O  
ANISOU 2089  O   TYR A1117     3005   3579   2597   -549   -440   -124       O  
ATOM   2090  CB  TYR A1117      22.946 123.287  34.364  1.00 26.97           C  
ANISOU 2090  CB  TYR A1117     3192   4890   2167  -1059    181    456       C  
ATOM   2091  CG  TYR A1117      21.432 123.173  34.302  1.00 30.57           C  
ANISOU 2091  CG  TYR A1117     3712   5720   2181  -1044    205    631       C  
ATOM   2092  CD1 TYR A1117      20.816 122.036  33.796  1.00 34.64           C  
ANISOU 2092  CD1 TYR A1117     4105   6107   2949  -1016   -185    674       C  
ATOM   2093  CD2 TYR A1117      20.621 124.196  34.765  1.00 30.65           C  
ANISOU 2093  CD2 TYR A1117     3467   6198   1981   -946    521    629       C  
ATOM   2094  CE1 TYR A1117      19.433 121.934  33.746  1.00 34.17           C  
ANISOU 2094  CE1 TYR A1117     3386   6486   3113  -1003   -584    578       C  
ATOM   2095  CE2 TYR A1117      19.244 124.106  34.718  1.00 29.73           C  
ANISOU 2095  CE2 TYR A1117     2516   6597   2185   -926   -512    496       C  
ATOM   2096  CZ  TYR A1117      18.653 122.974  34.209  1.00 34.05           C  
ANISOU 2096  CZ  TYR A1117     3456   6756   2727   -851   -593    499       C  
ATOM   2097  OH  TYR A1117      17.280 122.886  34.164  1.00 38.29           O  
ANISOU 2097  OH  TYR A1117     4588   7116   2843   -589   -243    515       O  
ATOM   2098  N   ASP A1118      23.830 126.369  33.789  1.00 25.00           N  
ANISOU 2098  N   ASP A1118     3807   3503   2191  -1692    297   -558       N  
ATOM   2099  CA  ASP A1118      23.593 127.812  33.724  1.00 28.83           C  
ANISOU 2099  CA  ASP A1118     4903   3796   2255  -1291    919   -208       C  
ATOM   2100  C   ASP A1118      24.836 128.486  33.148  1.00 23.12           C  
ANISOU 2100  C   ASP A1118     3292   3462   2032   -409    372    -97       C  
ATOM   2101  O   ASP A1118      25.619 129.094  33.890  1.00 25.15           O  
ANISOU 2101  O   ASP A1118     4502   3327   1725   -143    202   -309       O  
ATOM   2102  CB  ASP A1118      23.281 128.410  35.097  1.00 35.47           C  
ANISOU 2102  CB  ASP A1118     6654   4426   2397  -1599   1411   -489       C  
ATOM   2103  CG  ASP A1118      22.154 127.698  35.810  1.00 42.61           C  
ANISOU 2103  CG  ASP A1118     8574   5013   2603  -1549   1103   -646       C  
ATOM   2104  OD1 ASP A1118      21.442 126.916  35.155  1.00 47.00           O  
ANISOU 2104  OD1 ASP A1118     9619   5545   2692  -1470    706   -593       O  
ATOM   2105  OD2 ASP A1118      21.976 127.932  37.026  1.00 39.59           O  
ANISOU 2105  OD2 ASP A1118     7444   4881   2716  -1929   1589   -552       O  
ATOM   2106  N   PRO A1119      25.038 128.418  31.829  1.00 21.54           N  
ANISOU 2106  N   PRO A1119     3554   3164   1466     86   -394   -292       N  
ATOM   2107  CA  PRO A1119      26.245 129.028  31.249  1.00 21.11           C  
ANISOU 2107  CA  PRO A1119     3196   3366   1459   -105   -179   -330       C  
ATOM   2108  C   PRO A1119      26.256 130.545  31.314  1.00 21.35           C  
ANISOU 2108  C   PRO A1119     3252   3417   1442   -219   -437   -220       C  
ATOM   2109  O   PRO A1119      27.333 131.140  31.192  1.00 20.98           O  
ANISOU 2109  O   PRO A1119     2574   3590   1806   -302    -22   -211       O  
ATOM   2110  CB  PRO A1119      26.234 128.527  29.799  1.00 22.29           C  
ANISOU 2110  CB  PRO A1119     3766   3459   1243     17   -405   -724       C  
ATOM   2111  CG  PRO A1119      24.796 128.286  29.508  1.00 23.87           C  
ANISOU 2111  CG  PRO A1119     3995   3574   1501   -430   -764   -621       C  
ATOM   2112  CD  PRO A1119      24.189 127.800  30.800  1.00 22.67           C  
ANISOU 2112  CD  PRO A1119     3648   3471   1496   -367   -910   -478       C  
ATOM   2113  N   ASN A1120      25.105 131.187  31.503  1.00 20.57           N  
ANISOU 2113  N   ASN A1120     3171   3439   1204   -237   -304    113       N  
ATOM   2114  CA  ASN A1120      25.021 132.640  31.563  1.00 20.72           C  
ANISOU 2114  CA  ASN A1120     3194   3414   1262    144   -422    201       C  
ATOM   2115  C   ASN A1120      25.161 133.183  32.981  1.00 19.35           C  
ANISOU 2115  C   ASN A1120     3041   3071   1240    347   -327    614       C  
ATOM   2116  O   ASN A1120      24.946 134.380  33.200  1.00 22.55           O  
ANISOU 2116  O   ASN A1120     4004   3194   1370    598   -457    489       O  
ATOM   2117  CB  ASN A1120      23.713 133.124  30.929  1.00 24.63           C  
ANISOU 2117  CB  ASN A1120     3904   3745   1708   -241   -902    249       C  
ATOM   2118  CG  ASN A1120      23.772 134.580  30.505  1.00 29.39           C  
ANISOU 2118  CG  ASN A1120     5002   4014   2152   -233   -513    174       C  
ATOM   2119  OD1 ASN A1120      24.851 135.134  30.297  1.00 30.49           O  
ANISOU 2119  OD1 ASN A1120     5447   3896   2241   -987    -71    354       O  
ATOM   2120  ND2 ASN A1120      22.608 135.206  30.374  1.00 33.31           N  
ANISOU 2120  ND2 ASN A1120     5941   4244   2473    193   -590    189       N  
ATOM   2121  N   LYS A1121      25.517 132.338  33.944  1.00 16.97           N  
ANISOU 2121  N   LYS A1121     2541   2994    911    -11   -165    509       N  
ATOM   2122  CA  LYS A1121      25.713 132.761  35.320  1.00 16.45           C  
ANISOU 2122  CA  LYS A1121     2716   2675    861     13   -167    343       C  
ATOM   2123  C   LYS A1121      27.146 132.480  35.752  1.00 17.44           C  
ANISOU 2123  C   LYS A1121     2947   2538   1143    -84   -408    154       C  
ATOM   2124  O   LYS A1121      27.845 131.649  35.165  1.00 17.57           O  
ANISOU 2124  O   LYS A1121     2937   2568   1171   -104   -434     15       O  
ATOM   2125  CB  LYS A1121      24.731 132.060  36.271  1.00 17.36           C  
ANISOU 2125  CB  LYS A1121     2394   2828   1374   -679    134    438       C  
ATOM   2126  CG  LYS A1121      23.274 132.426  36.034  1.00 17.33           C  
ANISOU 2126  CG  LYS A1121     2013   3056   1517   -619    414    593       C  
ATOM   2127  CD  LYS A1121      22.379 131.900  37.146  1.00 19.25           C  
ANISOU 2127  CD  LYS A1121     1778   3645   1891   -410    413    388       C  
ATOM   2128  CE  LYS A1121      20.935 132.337  36.944  1.00 23.39           C  
ANISOU 2128  CE  LYS A1121     2294   4101   2494   -529    814    636       C  
ATOM   2129  NZ  LYS A1121      20.058 131.921  38.073  1.00 28.65           N  
ANISOU 2129  NZ  LYS A1121     3559   4435   2890   -258    364    626       N  
ATOM   2130  N   TYR A1122      27.579 133.196  36.786  1.00 15.25           N  
ANISOU 2130  N   TYR A1122     2749   2191    855     41   -510     98       N  
ATOM   2131  CA  TYR A1122      28.906 133.032  37.357  1.00 14.15           C  
ANISOU 2131  CA  TYR A1122     2582   2098    695   -133      5    240       C  
ATOM   2132  C   TYR A1122      28.787 132.885  38.867  1.00 14.67           C  
ANISOU 2132  C   TYR A1122     2872   1904    800    171   -207    228       C  
ATOM   2133  O   TYR A1122      27.775 133.248  39.471  1.00 15.35           O  
ANISOU 2133  O   TYR A1122     2772   2198    861     46    -74    126       O  
ATOM   2134  CB  TYR A1122      29.827 134.211  37.005  1.00 14.53           C  
ANISOU 2134  CB  TYR A1122     2757   1837    927   -227    313    398       C  
ATOM   2135  CG  TYR A1122      29.270 135.567  37.379  1.00 18.08           C  
ANISOU 2135  CG  TYR A1122     3684   1953   1232   -317    387    345       C  
ATOM   2136  CD1 TYR A1122      29.538 136.132  38.619  1.00 19.95           C  
ANISOU 2136  CD1 TYR A1122     3905   2130   1545     40    847    336       C  
ATOM   2137  CD2 TYR A1122      28.481 136.284  36.489  1.00 18.51           C  
ANISOU 2137  CD2 TYR A1122     3637   1920   1476   -347    491    580       C  
ATOM   2138  CE1 TYR A1122      29.035 137.370  38.964  1.00 19.22           C  
ANISOU 2138  CE1 TYR A1122     3419   2033   1851    324    513    118       C  
ATOM   2139  CE2 TYR A1122      27.972 137.524  36.826  1.00 19.15           C  
ANISOU 2139  CE2 TYR A1122     3462   1952   1862    252    333    577       C  
ATOM   2140  CZ  TYR A1122      28.251 138.062  38.064  1.00 20.85           C  
ANISOU 2140  CZ  TYR A1122     3769   2067   2084    298    348    410       C  
ATOM   2141  OH  TYR A1122      27.748 139.296  38.405  1.00 24.03           O  
ANISOU 2141  OH  TYR A1122     4246   2198   2687    100     61    430       O  
ATOM   2142  N   VAL A1123      29.839 132.347  39.474  1.00 16.15           N  
ANISOU 2142  N   VAL A1123     3259   2012    866    -35   -148    218       N  
ATOM   2143  CA  VAL A1123      29.832 132.064  40.904  1.00 15.63           C  
ANISOU 2143  CA  VAL A1123     3040   2135    764   -107    -25     18       C  
ATOM   2144  C   VAL A1123      30.109 133.348  41.674  1.00 17.26           C  
ANISOU 2144  C   VAL A1123     3282   2407    870   -237    258     20       C  
ATOM   2145  O   VAL A1123      31.012 134.116  41.324  1.00 16.66           O  
ANISOU 2145  O   VAL A1123     2926   2609    794   -250    158    151       O  
ATOM   2146  CB  VAL A1123      30.861 130.974  41.245  1.00 18.23           C  
ANISOU 2146  CB  VAL A1123     3458   2555    913     10   -223    201       C  
ATOM   2147  CG1 VAL A1123      30.816 130.646  42.728  1.00 17.71           C  
ANISOU 2147  CG1 VAL A1123     3404   2409    918   -141   -310    160       C  
ATOM   2148  CG2 VAL A1123      30.605 129.727  40.418  1.00 20.26           C  
ANISOU 2148  CG2 VAL A1123     3923   2671   1104   -609   -378     92       C  
ATOM   2149  N   ASP A1124      29.326 133.587  42.724  1.00 15.72           N  
ANISOU 2149  N   ASP A1124     2852   2289    831   -337     31   -195       N  
ATOM   2150  CA  ASP A1124      29.544 134.711  43.623  1.00 15.12           C  
ANISOU 2150  CA  ASP A1124     3102   1858    786   -143     61     64       C  
ATOM   2151  C   ASP A1124      29.317 134.235  45.050  1.00 14.71           C  
ANISOU 2151  C   ASP A1124     2969   1785    835   -118     35   -305       C  
ATOM   2152  O   ASP A1124      28.854 133.116  45.289  1.00 13.28           O  
ANISOU 2152  O   ASP A1124     2626   1737    681     -6    149    -40       O  
ATOM   2153  CB  ASP A1124      28.631 135.897  43.287  1.00 19.51           C  
ANISOU 2153  CB  ASP A1124     3854   2121   1438   -294     21    384       C  
ATOM   2154  CG  ASP A1124      29.186 137.221  43.782  1.00 25.63           C  
ANISOU 2154  CG  ASP A1124     5462   2363   1912   -230   -397    710       C  
ATOM   2155  OD1 ASP A1124      30.152 137.205  44.574  1.00 26.14           O  
ANISOU 2155  OD1 ASP A1124     5804   2411   1718   -697   -314    203       O  
ATOM   2156  OD2 ASP A1124      28.656 138.277  43.380  1.00 30.40           O  
ANISOU 2156  OD2 ASP A1124     6127   2623   2803    -52   -822    371       O  
ATOM   2157  N   VAL A1125      29.646 135.098  46.008  1.00 14.24           N  
ANISOU 2157  N   VAL A1125     2174   2387    851    199    197   -156       N  
ATOM   2158  CA AVAL A1125      29.531 134.786  47.427  0.50 15.04           C  
ANISOU 2158  CA AVAL A1125     2302   2433    978    100    121   -207       C  
ATOM   2159  CA BVAL A1125      29.532 134.787  47.428  0.50 14.11           C  
ANISOU 2159  CA BVAL A1125     1921   2534    907    199     76   -284       C  
ATOM   2160  C   VAL A1125      28.576 135.783  48.068  1.00 16.41           C  
ANISOU 2160  C   VAL A1125     2608   2289   1339     -4    199   -155       C  
ATOM   2161  O   VAL A1125      28.666 136.991  47.816  1.00 20.32           O  
ANISOU 2161  O   VAL A1125     3589   2099   2034     59    717     87       O  
ATOM   2162  CB AVAL A1125      30.904 134.796  48.126  0.50 16.82           C  
ANISOU 2162  CB AVAL A1125     2907   2421   1063     12    197      6       C  
ATOM   2163  CB BVAL A1125      30.905 134.818  48.125  0.50 13.89           C  
ANISOU 2163  CB BVAL A1125     1684   2749    842    350    124   -238       C  
ATOM   2164  CG1AVAL A1125      31.613 136.127  47.912  0.50 18.69           C  
ANISOU 2164  CG1AVAL A1125     3497   2341   1264     -3    270     83       C  
ATOM   2165  CG1BVAL A1125      30.758 134.506  49.608  0.50 15.01           C  
ANISOU 2165  CG1BVAL A1125     2039   2857    806    409    -66   -113       C  
ATOM   2166  CG2AVAL A1125      30.753 134.493  49.611  0.50 17.87           C  
ANISOU 2166  CG2AVAL A1125     3226   2538   1025    132     65    175       C  
ATOM   2167  CG2BVAL A1125      31.857 133.834  47.463  0.50 14.63           C  
ANISOU 2167  CG2BVAL A1125     1727   2778   1055    757    300   -232       C  
ATOM   2168  N   ASN A1126      27.655 135.274  48.883  1.00 16.51           N  
ANISOU 2168  N   ASN A1126     2949   2438    887     84    336   -193       N  
ATOM   2169  CA  ASN A1126      26.745 136.098  49.672  1.00 14.49           C  
ANISOU 2169  CA  ASN A1126     1727   2736   1041    226    453   -142       C  
ATOM   2170  C   ASN A1126      27.245 136.027  51.111  1.00 15.65           C  
ANISOU 2170  C   ASN A1126     2457   2678    812    430   -138   -264       C  
ATOM   2171  O   ASN A1126      26.756 135.238  51.920  1.00 16.47           O  
ANISOU 2171  O   ASN A1126     2396   2759   1105    121    -33   -250       O  
ATOM   2172  CB  ASN A1126      25.305 135.597  49.551  1.00 15.25           C  
ANISOU 2172  CB  ASN A1126     1874   2726   1196    313    317   -276       C  
ATOM   2173  CG  ASN A1126      24.341 136.384  50.421  1.00 15.98           C  
ANISOU 2173  CG  ASN A1126     2137   2509   1427    -39    243   -124       C  
ATOM   2174  OD1 ASN A1126      24.414 137.610  50.496  1.00 17.56           O  
ANISOU 2174  OD1 ASN A1126     2972   2446   1253    299    385   -376       O  
ATOM   2175  ND2 ASN A1126      23.442 135.678  51.095  1.00 15.89           N  
ANISOU 2175  ND2 ASN A1126     2418   2208   1411    271    186    -85       N  
ATOM   2176  N   ASN A1127      28.251 136.852  51.414  1.00 16.14           N  
ANISOU 2176  N   ASN A1127     2629   2369   1136    -70    123   -257       N  
ATOM   2177  CA  ASN A1127      28.909 136.909  52.719  1.00 13.32           C  
ANISOU 2177  CA  ASN A1127     2086   2017    960   -218   -222    -18       C  
ATOM   2178  C   ASN A1127      29.766 135.679  53.005  1.00 14.07           C  
ANISOU 2178  C   ASN A1127     1722   2231   1394   -418   -249   -268       C  
ATOM   2179  O   ASN A1127      29.378 134.547  52.696  1.00 15.85           O  
ANISOU 2179  O   ASN A1127     2037   2464   1519   -119    -97   -491       O  
ATOM   2180  CB  ASN A1127      27.909 137.152  53.856  1.00 14.09           C  
ANISOU 2180  CB  ASN A1127     2476   1881    998     18    467   -237       C  
ATOM   2181  CG  ASN A1127      27.205 138.486  53.738  1.00 15.72           C  
ANISOU 2181  CG  ASN A1127     2766   1891   1317    434    496   -315       C  
ATOM   2182  OD1 ASN A1127      27.809 139.488  53.354  1.00 21.65           O  
ANISOU 2182  OD1 ASN A1127     3672   2644   1910    380    574   -283       O  
ATOM   2183  ND2 ASN A1127      25.919 138.507  54.069  1.00 17.78           N  
ANISOU 2183  ND2 ASN A1127     2903   2070   1783    -32     70   -185       N  
ATOM   2184  N   VAL A1128      30.935 135.901  53.597  1.00 15.22           N  
ANISOU 2184  N   VAL A1128     1823   2356   1603   -202    -80     76       N  
ATOM   2185  CA  VAL A1128      31.812 134.818  54.024  1.00 15.70           C  
ANISOU 2185  CA  VAL A1128     2274   2112   1577   -276   -133     72       C  
ATOM   2186  C   VAL A1128      31.290 134.245  55.334  1.00 17.47           C  
ANISOU 2186  C   VAL A1128     2699   2221   1717   -802   -277   -372       C  
ATOM   2187  O   VAL A1128      30.789 134.978  56.196  1.00 20.54           O  
ANISOU 2187  O   VAL A1128     3004   2623   2176   -151    147   -489       O  
ATOM   2188  CB  VAL A1128      33.255 135.341  54.169  1.00 16.64           C  
ANISOU 2188  CB  VAL A1128     2337   2106   1880    109     55    172       C  
ATOM   2189  CG1 VAL A1128      34.140 134.325  54.877  1.00 17.86           C  
ANISOU 2189  CG1 VAL A1128     2466   2259   2063   -321     76     64       C  
ATOM   2190  CG2 VAL A1128      33.831 135.693  52.805  1.00 16.54           C  
ANISOU 2190  CG2 VAL A1128     2410   2091   1784    134    536    -42       C  
ATOM   2191  N   GLY A1129      31.390 132.932  55.485  1.00 15.52           N  
ANISOU 2191  N   GLY A1129     2195   2133   1571   -782   -170   -555       N  
ATOM   2192  CA  GLY A1129      31.018 132.260  56.713  1.00 17.29           C  
ANISOU 2192  CA  GLY A1129     3019   2230   1319   -788    125   -489       C  
ATOM   2193  C   GLY A1129      29.857 131.302  56.514  1.00 15.02           C  
ANISOU 2193  C   GLY A1129     2703   1990   1015   -225    614   -360       C  
ATOM   2194  O   GLY A1129      29.199 131.272  55.475  1.00 14.41           O  
ANISOU 2194  O   GLY A1129     2805   1945    726    308     22    -14       O  
ATOM   2195  N   ILE A1130      29.618 130.510  57.562  1.00 14.68           N  
ANISOU 2195  N   ILE A1130     2260   2574    745   -263    249   -169       N  
ATOM   2196  CA  ILE A1130      28.543 129.525  57.533  1.00 14.40           C  
ANISOU 2196  CA  ILE A1130     2534   2245    694   -281    139    -92       C  
ATOM   2197  C   ILE A1130      27.179 130.186  57.393  1.00 15.38           C  
ANISOU 2197  C   ILE A1130     2357   2708    778   -460   -113   -126       C  
ATOM   2198  O   ILE A1130      26.227 129.550  56.926  1.00 18.75           O  
ANISOU 2198  O   ILE A1130     3067   3088    971   -779    -36    109       O  
ATOM   2199  CB  ILE A1130      28.622 128.600  58.767  1.00 19.36           C  
ANISOU 2199  CB  ILE A1130     3918   2440    997   -281      8    -79       C  
ATOM   2200  CG1 ILE A1130      27.860 127.298  58.514  1.00 24.07           C  
ANISOU 2200  CG1 ILE A1130     5240   2466   1439   -327   -259   -312       C  
ATOM   2201  CG2 ILE A1130      28.088 129.305  60.006  1.00 19.98           C  
ANISOU 2201  CG2 ILE A1130     3728   2857   1006    470    205    104       C  
ATOM   2202  CD1 ILE A1130      28.468 126.442  57.425  1.00 24.00           C  
ANISOU 2202  CD1 ILE A1130     5181   2456   1481   -758    -32   -327       C  
ATOM   2203  N   ARG A1131      27.059 131.456  57.781  1.00 15.92           N  
ANISOU 2203  N   ARG A1131     2779   2379    891    876     71   -111       N  
ATOM   2204  CA AARG A1131      25.831 132.236  57.662  0.53 17.68           C  
ANISOU 2204  CA AARG A1131     3059   2735    925    415   -319   -275       C  
ATOM   2205  CA BARG A1131      25.769 132.109  57.629  0.47 15.32           C  
ANISOU 2205  CA BARG A1131     2397   2601    821    636   -176   -185       C  
ATOM   2206  C   ARG A1131      25.550 132.683  56.236  1.00 14.35           C  
ANISOU 2206  C   ARG A1131     2166   2509    777    438   -173   -310       C  
ATOM   2207  O   ARG A1131      24.439 133.140  55.946  1.00 14.23           O  
ANISOU 2207  O   ARG A1131     1831   2778    798   -115    306   -116       O  
ATOM   2208  CB AARG A1131      25.950 133.501  58.516  0.53 24.95           C  
ANISOU 2208  CB AARG A1131     4976   3101   1403      6   -194   -401       C  
ATOM   2209  CB BARG A1131      25.532 133.129  58.747  0.47 18.48           C  
ANISOU 2209  CB BARG A1131     3283   2788    952    693     39   -107       C  
ATOM   2210  CG AARG A1131      27.141 134.384  58.130  0.53 30.93           C  
ANISOU 2210  CG AARG A1131     6308   3498   1947    -88   -344   -397       C  
ATOM   2211  CG BARG A1131      25.323 132.447  60.096  0.47 22.83           C  
ANISOU 2211  CG BARG A1131     4368   3168   1136    429   -159    -45       C  
ATOM   2212  CD AARG A1131      26.716 135.799  57.757  0.53 33.83           C  
ANISOU 2212  CD AARG A1131     6761   3820   2273   -246   -553   -165       C  
ATOM   2213  CD BARG A1131      25.054 133.426  61.224  0.47 26.62           C  
ANISOU 2213  CD BARG A1131     5223   3463   1430    329   -461    -19       C  
ATOM   2214  NE AARG A1131      27.856 136.687  57.540  0.53 33.93           N  
ANISOU 2214  NE AARG A1131     6653   3933   2307   -112   -560   -307       N  
ATOM   2215  NE BARG A1131      26.178 134.329  61.452  0.47 32.13           N  
ANISOU 2215  NE BARG A1131     6443   3811   1955    169  -1019     52       N  
ATOM   2216  CZ AARG A1131      27.760 138.002  57.364  0.53 31.50           C  
ANISOU 2216  CZ AARG A1131     6155   3837   1976    196   -544   -606       C  
ATOM   2217  CZ BARG A1131      27.304 133.985  62.069  0.47 34.72           C  
ANISOU 2217  CZ BARG A1131     6867   4005   2321   -314  -1530    248       C  
ATOM   2218  NH1AARG A1131      26.572 138.591  57.385  0.53 32.89           N  
ANISOU 2218  NH1AARG A1131     6670   3939   1890    580   -540   -356       N  
ATOM   2219  NH1BARG A1131      27.470 132.749  62.521  0.47 35.76           N  
ANISOU 2219  NH1BARG A1131     6964   4098   2526   -328  -1694    470       N  
ATOM   2220  NH2AARG A1131      28.852 138.730  57.172  0.53 29.95           N  
ANISOU 2220  NH2AARG A1131     5622   3728   2029    -34   -753  -1003       N  
ATOM   2221  NH2BARG A1131      28.270 134.879  62.232  0.47 35.72           N  
ANISOU 2221  NH2BARG A1131     7187   4019   2368   -625  -1503     55       N  
ATOM   2222  N   GLY A1132      26.552 132.618  55.359  1.00 13.38           N  
ANISOU 2222  N   GLY A1132     2222   2225    635     -2    103   -305       N  
ATOM   2223  CA  GLY A1132      26.402 132.973  53.971  1.00 13.16           C  
ANISOU 2223  CA  GLY A1132     2215   2045    742    114    214   -448       C  
ATOM   2224  C   GLY A1132      26.416 131.750  53.074  1.00 11.60           C  
ANISOU 2224  C   GLY A1132     1840   1997    571     23     76   -281       C  
ATOM   2225  O   GLY A1132      26.340 130.606  53.528  1.00 13.67           O  
ANISOU 2225  O   GLY A1132     2397   2052    744    -67     89   -222       O  
ATOM   2226  N   TYR A1133      26.526 132.008  51.774  1.00 11.98           N  
ANISOU 2226  N   TYR A1133     1821   2104    627     52   -212   -280       N  
ATOM   2227  CA  TYR A1133      26.538 130.912  50.818  1.00 13.65           C  
ANISOU 2227  CA  TYR A1133     2416   2066    705   -158     83   -336       C  
ATOM   2228  C   TYR A1133      27.144 131.375  49.503  1.00 11.64           C  
ANISOU 2228  C   TYR A1133     1897   1765    762    -12     83   -218       C  
ATOM   2229  O   TYR A1133      27.212 132.572  49.211  1.00 12.20           O  
ANISOU 2229  O   TYR A1133     2075   1560   1002   -344    -92   -126       O  
ATOM   2230  CB  TYR A1133      25.130 130.349  50.578  1.00 14.80           C  
ANISOU 2230  CB  TYR A1133     2710   2063    852   -258   -155   -412       C  
ATOM   2231  CG  TYR A1133      24.109 131.364  50.097  1.00 15.23           C  
ANISOU 2231  CG  TYR A1133     2739   2234    814     -3   -425   -162       C  
ATOM   2232  CD1 TYR A1133      24.077 131.779  48.769  1.00 13.17           C  
ANISOU 2232  CD1 TYR A1133     1960   2334    709     10   -158   -384       C  
ATOM   2233  CD2 TYR A1133      23.166 131.893  50.968  1.00 14.09           C  
ANISOU 2233  CD2 TYR A1133     2370   2282    701    161   -158   -275       C  
ATOM   2234  CE1 TYR A1133      23.146 132.701  48.329  1.00 13.73           C  
ANISOU 2234  CE1 TYR A1133     2075   2436    706    137    148   -317       C  
ATOM   2235  CE2 TYR A1133      22.228 132.814  50.535  1.00 11.78           C  
ANISOU 2235  CE2 TYR A1133     1547   2296    633    128    -63   -265       C  
ATOM   2236  CZ  TYR A1133      22.224 133.215  49.215  1.00 14.85           C  
ANISOU 2236  CZ  TYR A1133     2418   2335    890    296   -354   -468       C  
ATOM   2237  OH  TYR A1133      21.292 134.131  48.781  1.00 14.91           O  
ANISOU 2237  OH  TYR A1133     2616   2188    860    180   -133   -277       O  
ATOM   2238  N   MET A1134      27.586 130.399  48.719  1.00 11.44           N  
ANISOU 2238  N   MET A1134     1636   2054    655    266     70   -345       N  
ATOM   2239  CA AMET A1134      28.005 130.616  47.343  0.59 12.58           C  
ANISOU 2239  CA AMET A1134     1881   2156    742    185    314   -255       C  
ATOM   2240  CA BMET A1134      27.994 130.643  47.347  0.41 14.02           C  
ANISOU 2240  CA BMET A1134     2000   2328    998    158     63   -295       C  
ATOM   2241  C   MET A1134      26.822 130.349  46.421  1.00 12.97           C  
ANISOU 2241  C   MET A1134     2002   2066    861    -17   -396   -352       C  
ATOM   2242  O   MET A1134      26.005 129.462  46.683  1.00 13.78           O  
ANISOU 2242  O   MET A1134     2368   2062    806    -19      6   -146       O  
ATOM   2243  CB AMET A1134      29.140 129.657  46.983  0.59 12.37           C  
ANISOU 2243  CB AMET A1134     1559   2328    813    -51    295   -136       C  
ATOM   2244  CB BMET A1134      29.200 129.784  46.967  0.41 17.36           C  
ANISOU 2244  CB BMET A1134     2143   2948   1505      7   -138   -242       C  
ATOM   2245  CG AMET A1134      30.316 129.681  47.944  0.59 15.18           C  
ANISOU 2245  CG AMET A1134     2248   2589    930    137    139   -338       C  
ATOM   2246  CG BMET A1134      30.519 130.325  47.492  0.41 21.70           C  
ANISOU 2246  CG BMET A1134     2800   3470   1974     36   -458   -362       C  
ATOM   2247  SD AMET A1134      31.227 131.233  47.891  0.59 18.11           S  
ANISOU 2247  SD AMET A1134     2790   3084   1007   -292    190   -207       S  
ATOM   2248  SD BMET A1134      31.924 129.295  47.041  0.41 25.03           S  
ANISOU 2248  SD BMET A1134     3151   3813   2545    125   -628   -350       S  
ATOM   2249  CE AMET A1134      31.656 131.318  46.156  0.59 16.76           C  
ANISOU 2249  CE AMET A1134     2267   2924   1179   -638   -218   -350       C  
ATOM   2250  CE BMET A1134      31.542 127.805  47.952  0.41 17.53           C  
ANISOU 2250  CE BMET A1134     1173   3602   1887     19   -182   -428       C  
ATOM   2251  N   TYR A1135      26.734 131.117  45.339  1.00 12.88           N  
ANISOU 2251  N   TYR A1135     2019   2216    660    299    -55   -207       N  
ATOM   2252  CA  TYR A1135      25.607 130.974  44.431  1.00 11.94           C  
ANISOU 2252  CA  TYR A1135     1444   2386    708    181     42    -24       C  
ATOM   2253  C   TYR A1135      26.021 131.371  43.023  1.00 13.72           C  
ANISOU 2253  C   TYR A1135     2237   2269    707    -61    366    265       C  
ATOM   2254  O   TYR A1135      27.116 131.890  42.792  1.00 13.83           O  
ANISOU 2254  O   TYR A1135     2196   2377    681    -49    225    272       O  
ATOM   2255  CB  TYR A1135      24.389 131.775  44.911  1.00 13.22           C  
ANISOU 2255  CB  TYR A1135     1818   2061   1143    296    112     33       C  
ATOM   2256  CG  TYR A1135      24.561 133.279  44.876  1.00 14.60           C  
ANISOU 2256  CG  TYR A1135     2385   2069   1094    -83    -70    145       C  
ATOM   2257  CD1 TYR A1135      23.902 134.050  43.927  1.00 14.45           C  
ANISOU 2257  CD1 TYR A1135     2485   1898   1107    -44    -72    422       C  
ATOM   2258  CD2 TYR A1135      25.373 133.930  45.798  1.00 14.09           C  
ANISOU 2258  CD2 TYR A1135     2150   1858   1346   -601     94     23       C  
ATOM   2259  CE1 TYR A1135      24.050 135.424  43.894  1.00 16.31           C  
ANISOU 2259  CE1 TYR A1135     3022   1947   1229    190   -149    380       C  
ATOM   2260  CE2 TYR A1135      25.528 135.304  45.770  1.00 15.47           C  
ANISOU 2260  CE2 TYR A1135     2608   2019   1252   -205    374     55       C  
ATOM   2261  CZ  TYR A1135      24.864 136.046  44.816  1.00 16.46           C  
ANISOU 2261  CZ  TYR A1135     3145   1726   1385     -6    348    295       C  
ATOM   2262  OH  TYR A1135      25.013 137.414  44.784  1.00 18.99           O  
ANISOU 2262  OH  TYR A1135     3606   1874   1734    242    457    329       O  
ATOM   2263  N   LEU A1136      25.124 131.104  42.080  1.00 13.56           N  
ANISOU 2263  N   LEU A1136     2255   2211    685    198   -118    309       N  
ATOM   2264  CA  LEU A1136      25.293 131.478  40.684  1.00 15.00           C  
ANISOU 2264  CA  LEU A1136     2549   2422    726    184   -239    182       C  
ATOM   2265  C   LEU A1136      24.380 132.657  40.386  1.00 17.61           C  
ANISOU 2265  C   LEU A1136     3046   2458   1187    109   -175     -2       C
[truncated: 267,301 more chars]
