# Supplementary material for: High resolution crystal structures of the receptor-binding domain of Clostridium botulinum neurotoxin serotypes A and FA
Source: PeerJ. 2018 Mar 21;6:e4552. doi: 10.7717/peerj.4552 (PMC5866713; doi:10.7717/peerj.4552)
Supplement: Supplemental Information 1 [file peerj-06-4552-s001.zip › 5MK7.pdb]

HEADER    TOXIN                                   02-DEC-16   5MK7              
TITLE     CRYSTAL STRUCTURE OF THE RECEPTOR-BINDING DOMAIN OF BOTULINUM         
TITLE    2 NEUROTOXIN A1 (CRYSTAL FORM 2)                                       
COMPND    MOL_ID: 1;                                                            
COMPND   2 MOLECULE: BOTULINUM NEUROTOXIN TYPE A;                               
COMPND   3 CHAIN: A;                                                            
COMPND   4 SYNONYM: BONT/A,BONTOXILYSIN-A,BOTOX;                                
COMPND   5 EC: 3.4.24.69;                                                       
COMPND   6 ENGINEERED: YES                                                      
SOURCE    MOL_ID: 1;                                                            
SOURCE   2 ORGANISM_SCIENTIFIC: CLOSTRIDIUM BOTULINUM;                          
SOURCE   3 ORGANISM_TAXID: 1491;                                                
SOURCE   4 GENE: BOTA, ATX, BNA;                                                
SOURCE   5 EXPRESSION_SYSTEM: ESCHERICHIA COLI;                                 
SOURCE   6 EXPRESSION_SYSTEM_TAXID: 562                                         
KEYWDS    BACTERIAL, TOXIN, TOXIN RECEPTOR BINDING DOMAIN, JELLY ROLL FOLD,     
KEYWDS   2 BETA TREFOIL FOLD                                                    
EXPDTA    X-RAY DIFFRACTION                                                     
AUTHOR    J.R.DAVIES,K.R.ACHARYA                                                
JRNL        AUTH   J.R.DAVIES,G.HACKETT,S.M.LIU,K.R.ACHARYA                     
JRNL        TITL   CRYSTAL STRUCTURE OF THE RECEPTOR-BINDING DOMAIN OF THE FA   
JRNL        TITL 2 HYBRID CLOSTRIDIUM BOTULINUM NEUROTOXIN                      
JRNL        REF    TO BE PUBLISHED                                              
JRNL        REFN                                                                
REMARK   2                                                                      
REMARK   2 RESOLUTION.    1.90 ANGSTROMS.                                       
REMARK   3                                                                      
REMARK   3 REFINEMENT.                                                          
REMARK   3   PROGRAM     : PHENIX (1.10.1_2155)                                 
REMARK   3   AUTHORS     : PAUL ADAMS,PAVEL AFONINE,VINCENT CHEN,IAN            
REMARK   3               : DAVIS,KRESHNA GOPAL,RALF GROSSE-KUNSTLEVE,           
REMARK   3               : LI-WEI HUNG,ROBERT IMMORMINO,TOM IOERGER,            
REMARK   3               : AIRLIE MCCOY,ERIK MCKEE,NIGEL MORIARTY,              
REMARK   3               : REETAL PAI,RANDY READ,JANE RICHARDSON,               
REMARK   3               : DAVID RICHARDSON,TOD ROMO,JIM SACCHETTINI,           
REMARK   3               : NICHOLAS SAUTER,JACOB SMITH,LAURENT                  
REMARK   3               : STORONI,TOM TERWILLIGER,PETER ZWART                  
REMARK   3                                                                      
REMARK   3    REFINEMENT TARGET : NULL                                          
REMARK   3                                                                      
REMARK   3  DATA USED IN REFINEMENT.                                            
REMARK   3   RESOLUTION RANGE HIGH (ANGSTROMS) : 1.90                           
REMARK   3   RESOLUTION RANGE LOW  (ANGSTROMS) : 60.24                          
REMARK   3   MIN(FOBS/SIGMA_FOBS)              : 1.340                          
REMARK   3   COMPLETENESS FOR RANGE        (%) : 97.4                           
REMARK   3   NUMBER OF REFLECTIONS             : 35708                          
REMARK   3                                                                      
REMARK   3  FIT TO DATA USED IN REFINEMENT.                                     
REMARK   3   R VALUE     (WORKING + TEST SET) : 0.189                           
REMARK   3   R VALUE            (WORKING SET) : 0.188                           
REMARK   3   FREE R VALUE                     : 0.223                           
REMARK   3   FREE R VALUE TEST SET SIZE   (%) : 4.910                           
REMARK   3   FREE R VALUE TEST SET COUNT      : 1752                            
REMARK   3                                                                      
REMARK   3  FIT TO DATA USED IN REFINEMENT (IN BINS).                           
REMARK   3   BIN  RESOLUTION RANGE  COMPL.    NWORK NFREE   RWORK  RFREE        
REMARK   3     1 60.2760 -  4.2323    1.00     2770   156  0.1665 0.1963        
REMARK   3     2  4.2323 -  3.3594    1.00     2694   142  0.1599 0.1846        
REMARK   3     3  3.3594 -  2.9347    1.00     2685   150  0.1807 0.2023        
REMARK   3     4  2.9347 -  2.6664    1.00     2683   132  0.1916 0.2517        
REMARK   3     5  2.6664 -  2.4753    1.00     2670   142  0.1972 0.2345        
REMARK   3     6  2.4753 -  2.3293    1.00     2698   122  0.1889 0.2464        
REMARK   3     7  2.3293 -  2.2127    0.98     2615   132  0.1993 0.2544        
REMARK   3     8  2.2127 -  2.1164    1.00     2687   124  0.1853 0.2382        
REMARK   3     9  2.1164 -  2.0349    0.98     2594   152  0.2311 0.2506        
REMARK   3    10  2.0349 -  1.9647    1.00     2670   140  0.1918 0.2539        
REMARK   3    11  1.9647 -  1.9032    0.89     2368   116  0.2802 0.3101        
REMARK   3    12  1.9032 -  1.8488    0.92     2449   131  0.2458 0.2823        
REMARK   3    13  1.8488 -  1.8001    0.89     2373   113  0.1904 0.2351        
REMARK   3                                                                      
REMARK   3  BULK SOLVENT MODELLING.                                             
REMARK   3   METHOD USED        : NULL                                          
REMARK   3   SOLVENT RADIUS     : 1.11                                          
REMARK   3   SHRINKAGE RADIUS   : 0.90                                          
REMARK   3   K_SOL              : NULL                                          
REMARK   3   B_SOL              : NULL                                          
REMARK   3                                                                      
REMARK   3  ERROR ESTIMATES.                                                    
REMARK   3   COORDINATE ERROR (MAXIMUM-LIKELIHOOD BASED)     : 0.170            
REMARK   3   PHASE ERROR (DEGREES, MAXIMUM-LIKELIHOOD BASED) : 24.280           
REMARK   3                                                                      
REMARK   3  B VALUES.                                                           
REMARK   3   FROM WILSON PLOT           (A**2) : NULL                           
REMARK   3   MEAN B VALUE      (OVERALL, A**2) : NULL                           
REMARK   3   OVERALL ANISOTROPIC B VALUE.                                       
REMARK   3    B11 (A**2) : NULL                                                 
REMARK   3    B22 (A**2) : NULL                                                 
REMARK   3    B33 (A**2) : NULL                                                 
REMARK   3    B12 (A**2) : NULL                                                 
REMARK   3    B13 (A**2) : NULL                                                 
REMARK   3    B23 (A**2) : NULL                                                 
REMARK   3                                                                      
REMARK   3  TWINNING INFORMATION.                                               
REMARK   3   FRACTION: NULL                                                     
REMARK   3   OPERATOR: NULL                                                     
REMARK   3                                                                      
REMARK   3  DEVIATIONS FROM IDEAL VALUES.                                       
REMARK   3                 RMSD          COUNT                                  
REMARK   3   BOND      :  0.003           3331                                  
REMARK   3   ANGLE     :  0.683           4504                                  
REMARK   3   CHIRALITY :  0.052            482                                  
REMARK   3   PLANARITY :  0.003            576                                  
REMARK   3   DIHEDRAL  : 15.299           1985                                  
REMARK   3                                                                      
REMARK   3  TLS DETAILS                                                         
REMARK   3   NUMBER OF TLS GROUPS  : NULL                                       
REMARK   3                                                                      
REMARK   3  NCS DETAILS                                                         
REMARK   3   NUMBER OF NCS GROUPS : NULL                                        
REMARK   3                                                                      
REMARK   3  OTHER REFINEMENT REMARKS: NULL                                      
REMARK   4                                                                      
REMARK   4 5MK7 COMPLIES WITH FORMAT V. 3.30, 13-JUL-11                         
REMARK 100                                                                      
REMARK 100 THIS ENTRY HAS BEEN PROCESSED BY PDBE ON 02-DEC-16.                  
REMARK 100 THE DEPOSITION ID IS D_1200002584.                                   
REMARK 200                                                                      
REMARK 200 EXPERIMENTAL DETAILS                                                 
REMARK 200  EXPERIMENT TYPE                : X-RAY DIFFRACTION                  
REMARK 200  DATE OF DATA COLLECTION        : 25-JUN-16                          
REMARK 200  TEMPERATURE           (KELVIN) : 100                                
REMARK 200  PH                             : 4.0                                
REMARK 200  NUMBER OF CRYSTALS USED        : 1                                  
REMARK 200                                                                      
REMARK 200  SYNCHROTRON              (Y/N) : Y                                  
REMARK 200  RADIATION SOURCE               : DIAMOND                            
REMARK 200  BEAMLINE                       : I02                                
REMARK 200  X-RAY GENERATOR MODEL          : NULL                               
REMARK 200  MONOCHROMATIC OR LAUE    (M/L) : M                                  
REMARK 200  WAVELENGTH OR RANGE        (A) : 0.97949                            
REMARK 200  MONOCHROMATOR                  : NULL                               
REMARK 200  OPTICS                         : NULL                               
REMARK 200                                                                      
REMARK 200  DETECTOR TYPE                  : PIXEL                              
REMARK 200  DETECTOR MANUFACTURER          : DECTRIS PILATUS 6M-F               
REMARK 200  INTENSITY-INTEGRATION SOFTWARE : DIALS                              
REMARK 200  DATA SCALING SOFTWARE          : AIMLESS                            
REMARK 200                                                                      
REMARK 200  NUMBER OF UNIQUE REFLECTIONS   : 36131                              
REMARK 200  RESOLUTION RANGE HIGH      (A) : 1.900                              
REMARK 200  RESOLUTION RANGE LOW       (A) : 60.500                             
REMARK 200  REJECTION CRITERIA  (SIGMA(I)) : NULL                               
REMARK 200                                                                      
REMARK 200 OVERALL.                                                             
REMARK 200  COMPLETENESS FOR RANGE     (%) : 98.6                               
REMARK 200  DATA REDUNDANCY                : 20.40                              
REMARK 200  R MERGE                    (I) : NULL                               
REMARK 200  R SYM                      (I) : NULL                               
REMARK 200  <I/SIGMA(I)> FOR THE DATA SET  : 14.4000                            
REMARK 200                                                                      
REMARK 200 IN THE HIGHEST RESOLUTION SHELL.                                     
REMARK 200  HIGHEST RESOLUTION SHELL, RANGE HIGH (A) : 1.80                     
REMARK 200  HIGHEST RESOLUTION SHELL, RANGE LOW  (A) : 1.84                     
REMARK 200  COMPLETENESS FOR SHELL     (%) : 89.1                               
REMARK 200  DATA REDUNDANCY IN SHELL       : 11.70                              
REMARK 200  R MERGE FOR SHELL          (I) : NULL                               
REMARK 200  R SYM FOR SHELL            (I) : NULL                               
REMARK 200  <I/SIGMA(I)> FOR SHELL         : 3.700                              
REMARK 200                                                                      
REMARK 200 DIFFRACTION PROTOCOL: SINGLE WAVELENGTH                              
REMARK 200 METHOD USED TO DETERMINE THE STRUCTURE: MOLECULAR REPLACEMENT        
REMARK 200 SOFTWARE USED: PHASER                                                
REMARK 200 STARTING MODEL: 2VUA                                                 
REMARK 200                                                                      
REMARK 200 REMARK: NULL                                                         
REMARK 280                                                                      
REMARK 280 CRYSTAL                                                              
REMARK 280 SOLVENT CONTENT, VS   (%): 37.42                                     
REMARK 280 MATTHEWS COEFFICIENT, VM (ANGSTROMS**3/DA): 1.97                     
REMARK 280                                                                      
REMARK 280 CRYSTALLIZATION CONDITIONS: 0.1 M MIB, 25% W/V PEG 1500, PH 4.0,     
REMARK 280  VAPOR DIFFUSION, SITTING DROP, TEMPERATURE 289.15K                  
REMARK 290                                                                      
REMARK 290 CRYSTALLOGRAPHIC SYMMETRY                                            
REMARK 290 SYMMETRY OPERATORS FOR SPACE GROUP: P 1 21 1                         
REMARK 290                                                                      
REMARK 290      SYMOP   SYMMETRY                                                
REMARK 290     NNNMMM   OPERATOR                                                
REMARK 290       1555   X,Y,Z                                                   
REMARK 290       2555   -X,Y+1/2,-Z                                             
REMARK 290                                                                      
REMARK 290     WHERE NNN -> OPERATOR NUMBER                                     
REMARK 290           MMM -> TRANSLATION VECTOR                                  
REMARK 290                                                                      
REMARK 290 CRYSTALLOGRAPHIC SYMMETRY TRANSFORMATIONS                            
REMARK 290 THE FOLLOWING TRANSFORMATIONS OPERATE ON THE ATOM/HETATM             
REMARK 290 RECORDS IN THIS ENTRY TO PRODUCE CRYSTALLOGRAPHICALLY                
REMARK 290 RELATED MOLECULES.                                                   
REMARK 290   SMTRY1   1  1.000000  0.000000  0.000000        0.00000            
REMARK 290   SMTRY2   1  0.000000  1.000000  0.000000        0.00000            
REMARK 290   SMTRY3   1  0.000000  0.000000  1.000000        0.00000            
REMARK 290   SMTRY1   2 -1.000000  0.000000  0.000000        0.00000            
REMARK 290   SMTRY2   2  0.000000  1.000000  0.000000       26.96350            
REMARK 290   SMTRY3   2  0.000000  0.000000 -1.000000        0.00000            
REMARK 290                                                                      
REMARK 290 REMARK: NULL                                                         
REMARK 300                                                                      
REMARK 300 BIOMOLECULE: 1                                                       
REMARK 300 SEE REMARK 350 FOR THE AUTHOR PROVIDED AND/OR PROGRAM                
REMARK 300 GENERATED ASSEMBLY INFORMATION FOR THE STRUCTURE IN                  
REMARK 300 THIS ENTRY. THE REMARK MAY ALSO PROVIDE INFORMATION ON               
REMARK 300 BURIED SURFACE AREA.                                                 
REMARK 350                                                                      
REMARK 350 COORDINATES FOR A COMPLETE MULTIMER REPRESENTING THE KNOWN           
REMARK 350 BIOLOGICALLY SIGNIFICANT OLIGOMERIZATION STATE OF THE                
REMARK 350 MOLECULE CAN BE GENERATED BY APPLYING BIOMT TRANSFORMATIONS          
REMARK 350 GIVEN BELOW.  BOTH NON-CRYSTALLOGRAPHIC AND                          
REMARK 350 CRYSTALLOGRAPHIC OPERATIONS ARE GIVEN.                               
REMARK 350                                                                      
REMARK 350 BIOMOLECULE: 1                                                       
REMARK 350 AUTHOR DETERMINED BIOLOGICAL UNIT: MONOMERIC                         
REMARK 350 SOFTWARE DETERMINED QUATERNARY STRUCTURE: MONOMERIC                  
REMARK 350 SOFTWARE USED: PISA                                                  
REMARK 350 TOTAL BURIED SURFACE AREA: 0 ANGSTROM**2                             
REMARK 350 SURFACE AREA OF THE COMPLEX: 18210 ANGSTROM**2                       
REMARK 350 CHANGE IN SOLVENT FREE ENERGY: 0.0 KCAL/MOL                          
REMARK 350 APPLY THE FOLLOWING TO CHAINS: A                                     
REMARK 350   BIOMT1   1  1.000000  0.000000  0.000000        0.00000            
REMARK 350   BIOMT2   1  0.000000  1.000000  0.000000        0.00000            
REMARK 350   BIOMT3   1  0.000000  0.000000  1.000000        0.00000            
REMARK 465                                                                      
REMARK 465 MISSING RESIDUES                                                     
REMARK 465 THE FOLLOWING RESIDUES WERE NOT LOCATED IN THE                       
REMARK 465 EXPERIMENT. (M=MODEL NUMBER; RES=RESIDUE NAME; C=CHAIN               
REMARK 465 IDENTIFIER; SSSEQ=SEQUENCE NUMBER; I=INSERTION CODE.)                
REMARK 465                                                                      
REMARK 465   M RES C SSSEQI                                                     
REMARK 465     MET A   864                                                      
REMARK 465     HIS A   865                                                      
REMARK 465     HIS A   866                                                      
REMARK 465     HIS A   867                                                      
REMARK 465     HIS A   868                                                      
REMARK 465     HIS A   869                                                      
REMARK 465     HIS A   870                                                      
REMARK 465     LYS A   871                                                      
REMARK 465     ASN A   872                                                      
REMARK 465     ILE A   873                                                      
REMARK 465     ILE A   874                                                      
REMARK 465     ASN A   875                                                      
REMARK 465     THR A   876                                                      
REMARK 465     SER A   877                                                      
REMARK 465     ILE A   878                                                      
REMARK 465     LEU A   879                                                      
REMARK 465     ASN A   880                                                      
REMARK 465     LEU A   881                                                      
REMARK 465     ARG A   882                                                      
REMARK 465     TYR A   883                                                      
REMARK 465     GLU A   884                                                      
REMARK 465     SER A   885                                                      
REMARK 465     ASN A  1227                                                      
REMARK 465     ASP A  1228                                                      
REMARK 465     GLN A  1229                                                      
REMARK 465     GLY A  1230                                                      
REMARK 465     ILE A  1231                                                      
REMARK 465     THR A  1232                                                      
REMARK 465     ASN A  1233                                                      
REMARK 465     ILE A  1271                                                      
REMARK 465     GLU A  1272                                                      
REMARK 465     ARG A  1273                                                      
REMARK 465     SER A  1274                                                      
REMARK 465     SER A  1275                                                      
REMARK 465     ARG A  1276                                                      
REMARK 465     LEU A  1296                                                      
REMARK 470                                                                      
REMARK 470 MISSING ATOM                                                         
REMARK 470 THE FOLLOWING RESIDUES HAVE MISSING ATOMS (M=MODEL NUMBER;           
REMARK 470 RES=RESIDUE NAME; C=CHAIN IDENTIFIER; SSEQ=SEQUENCE NUMBER;          
REMARK 470 I=INSERTION CODE):                                                   
REMARK 470   M RES CSSEQI  ATOMS                                                
REMARK 470     LYS A1234    CG   CD   CE   NZ                                   
REMARK 470     GLN A1270    CG   CD   OE1  NE2                                  
REMARK 500                                                                      
REMARK 500 GEOMETRY AND STEREOCHEMISTRY                                         
REMARK 500 SUBTOPIC: CLOSE CONTACTS IN SAME ASYMMETRIC UNIT                     
REMARK 500                                                                      
REMARK 500 THE FOLLOWING ATOMS ARE IN CLOSE CONTACT.                            
REMARK 500                                                                      
REMARK 500  ATM1  RES C  SSEQI   ATM2  RES C  SSEQI           DISTANCE          
REMARK 500   OD1  ASP A  1118     O    HOH A  1301              2.13            
REMARK 500   O    HOH A  1383     O    HOH A  1602              2.19            
REMARK 500   O    HOH A  1350     O    HOH A  1580              2.19            
REMARK 500                                                                      
REMARK 500 REMARK: NULL                                                         
REMARK 500                                                                      
REMARK 500 GEOMETRY AND STEREOCHEMISTRY                                         
REMARK 500 SUBTOPIC: TORSION ANGLES                                             
REMARK 500                                                                      
REMARK 500 TORSION ANGLES OUTSIDE THE EXPECTED RAMACHANDRAN REGIONS:            
REMARK 500 (M=MODEL NUMBER; RES=RESIDUE NAME; C=CHAIN IDENTIFIER;               
REMARK 500 SSEQ=SEQUENCE NUMBER; I=INSERTION CODE).                             
REMARK 500                                                                      
REMARK 500 STANDARD TABLE:                                                      
REMARK 500 FORMAT:(10X,I3,1X,A3,1X,A1,I4,A1,4X,F7.2,3X,F7.2)                    
REMARK 500                                                                      
REMARK 500 EXPECTED VALUES: GJ KLEYWEGT AND TA JONES (1996). PHI/PSI-           
REMARK 500 CHOLOGY: RAMACHANDRAN REVISITED. STRUCTURE 4, 1395 - 1400            
REMARK 500                                                                      
REMARK 500  M RES CSSEQI        PSI       PHI                                   
REMARK 500    ASN A 935       91.21   -164.07                                   
REMARK 500    ASN A 959       65.18     39.27                                   
REMARK 500    MET A1004       78.64   -104.88                                   
REMARK 500    ASN A1025     -112.58   -140.29                                   
REMARK 500    LYS A1056      136.36   -175.60                                   
REMARK 500    ASP A1076       30.19    -93.41                                   
REMARK 500    ASN A1127      136.11     72.77                                   
REMARK 500    THR A1146     -138.02     48.42                                   
REMARK 500    TYR A1165      -58.07   -136.69                                   
REMARK 500    GLN A1219      -12.92   -152.21                                   
REMARK 500                                                                      
REMARK 500 REMARK: NULL                                                         
DBREF  5MK7 A  871  1296  UNP    P10845   BXA1_CLOBO     871   1296             
SEQADV 5MK7 MET A  864  UNP  P10845              INITIATING METHIONINE          
SEQADV 5MK7 HIS A  865  UNP  P10845              EXPRESSION TAG                 
SEQADV 5MK7 HIS A  866  UNP  P10845              EXPRESSION TAG                 
SEQADV 5MK7 HIS A  867  UNP  P10845              EXPRESSION TAG                 
SEQADV 5MK7 HIS A  868  UNP  P10845              EXPRESSION TAG                 
SEQADV 5MK7 HIS A  869  UNP  P10845              EXPRESSION TAG                 
SEQADV 5MK7 HIS A  870  UNP  P10845              EXPRESSION TAG                 
SEQRES   1 A  433  MET HIS HIS HIS HIS HIS HIS LYS ASN ILE ILE ASN THR          
SEQRES   2 A  433  SER ILE LEU ASN LEU ARG TYR GLU SER ASN HIS LEU ILE          
SEQRES   3 A  433  ASP LEU SER ARG TYR ALA SER LYS ILE ASN ILE GLY SER          
SEQRES   4 A  433  LYS VAL ASN PHE ASP PRO ILE ASP LYS ASN GLN ILE GLN          
SEQRES   5 A  433  LEU PHE ASN LEU GLU SER SER LYS ILE GLU VAL ILE LEU          
SEQRES   6 A  433  LYS ASN ALA ILE VAL TYR ASN SER MET TYR GLU ASN PHE          
SEQRES   7 A  433  SER THR SER PHE TRP ILE ARG ILE PRO LYS TYR PHE ASN          
SEQRES   8 A  433  SER ILE SER LEU ASN ASN GLU TYR THR ILE ILE ASN CYS          
SEQRES   9 A  433  MET GLU ASN ASN SER GLY TRP LYS VAL SER LEU ASN TYR          
SEQRES  10 A  433  GLY GLU ILE ILE TRP THR LEU GLN ASP THR GLN GLU ILE          
SEQRES  11 A  433  LYS GLN ARG VAL VAL PHE LYS TYR SER GLN MET ILE ASN          
SEQRES  12 A  433  ILE SER ASP TYR ILE ASN ARG TRP ILE PHE VAL THR ILE          
SEQRES  13 A  433  THR ASN ASN ARG LEU ASN ASN SER LYS ILE TYR ILE ASN          
SEQRES  14 A  433  GLY ARG LEU ILE ASP GLN LYS PRO ILE SER ASN LEU GLY          
SEQRES  15 A  433  ASN ILE HIS ALA SER ASN ASN ILE MET PHE LYS LEU ASP          
SEQRES  16 A  433  GLY CYS ARG ASP THR HIS ARG TYR ILE TRP ILE LYS TYR          
SEQRES  17 A  433  PHE ASN LEU PHE ASP LYS GLU LEU ASN GLU LYS GLU ILE          
SEQRES  18 A  433  LYS ASP LEU TYR ASP ASN GLN SER ASN SER GLY ILE LEU          
SEQRES  19 A  433  LYS ASP PHE TRP GLY ASP TYR LEU GLN TYR ASP LYS PRO          
SEQRES  20 A  433  TYR TYR MET LEU ASN LEU TYR ASP PRO ASN LYS TYR VAL          
SEQRES  21 A  433  ASP VAL ASN ASN VAL GLY ILE ARG GLY TYR MET TYR LEU          
SEQRES  22 A  433  LYS GLY PRO ARG GLY SER VAL MET THR THR ASN ILE TYR          
SEQRES  23 A  433  LEU ASN SER SER LEU TYR ARG GLY THR LYS PHE ILE ILE          
SEQRES  24 A  433  LYS LYS TYR ALA SER GLY ASN LYS ASP ASN ILE VAL ARG          
SEQRES  25 A  433  ASN ASN ASP ARG VAL TYR ILE ASN VAL VAL VAL LYS ASN          
SEQRES  26 A  433  LYS GLU TYR ARG LEU ALA THR ASN ALA SER GLN ALA GLY          
SEQRES  27 A  433  VAL GLU LYS ILE LEU SER ALA LEU GLU ILE PRO ASP VAL          
SEQRES  28 A  433  GLY ASN LEU SER GLN VAL VAL VAL MET LYS SER LYS ASN          
SEQRES  29 A  433  ASP GLN GLY ILE THR ASN LYS CYS LYS MET ASN LEU GLN          
SEQRES  30 A  433  ASP ASN ASN GLY ASN ASP ILE GLY PHE ILE GLY PHE HIS          
SEQRES  31 A  433  GLN PHE ASN ASN ILE ALA LYS LEU VAL ALA SER ASN TRP          
SEQRES  32 A  433  TYR ASN ARG GLN ILE GLU ARG SER SER ARG THR LEU GLY          
SEQRES  33 A  433  CYS SER TRP GLU PHE ILE PRO VAL ASP ASP GLY TRP GLY          
SEQRES  34 A  433  GLU ARG PRO LEU                                              
FORMUL   2  HOH   *322(H2 O)                                                    
HELIX    1 AA1 ILE A  889  ARG A  893  5                                   5    
HELIX    2 AA2 ASN A  930  VAL A  933  5                                   4    
HELIX    3 AA3 ASN A  954  LEU A  958  5                                   5    
HELIX    4 AA4 ASN A 1080  GLN A 1091  1                                  12    
HELIX    5 AA5 GLU A 1210  VAL A 1214  5                                   5    
HELIX    6 AA6 ASN A 1265  GLN A 1270  1                                   6    
SHEET    1 AA1 7 ALA A 895  ILE A 900  0                                        
SHEET    2 AA1 7 ILE A 924  LEU A 928 -1  O  ILE A 927   N  SER A 896           
SHEET    3 AA1 7 ASN A1052  ASP A1058 -1  O  PHE A1055   N  ILE A 924           
SHEET    4 AA1 7 TYR A 962  GLU A 969 -1  N  ASN A 966   O  MET A1054           
SHEET    5 AA1 7 SER A 972  ASN A 979 -1  O  SER A 972   N  GLU A 969           
SHEET    6 AA1 7 GLU A 982  GLN A 988 -1  O  ILE A 984   N  SER A 977           
SHEET    7 AA1 7 LYS A 994  LYS A1000 -1  O  GLN A 995   N  LEU A 987           
SHEET    1 AA2 7 VAL A 904  PHE A 906  0                                        
SHEET    2 AA2 7 ILE A 914  PHE A 917 -1  O  GLN A 915   N  ASN A 905           
SHEET    3 AA2 7 TYR A1066  PHE A1075 -1  O  ILE A1069   N  ILE A 914           
SHEET    4 AA2 7 PHE A 941  ARG A 948 -1  N  TRP A 946   O  LYS A1070           
SHEET    5 AA2 7 ILE A1015  ASN A1021 -1  O  VAL A1017   N  PHE A 945           
SHEET    6 AA2 7 ASN A1026  ILE A1031 -1  O  TYR A1030   N  THR A1018           
SHEET    7 AA2 7 ARG A1034  PRO A1040 -1  O  LYS A1039   N  SER A1027           
SHEET    1 AA3 2 ASN A 935  SER A 936  0                                        
SHEET    2 AA3 2 ILE A1047  HIS A1048 -1  O  ILE A1047   N  SER A 936           
SHEET    1 AA4 9 TYR A1122  ASN A1126  0                                        
SHEET    2 AA4 9 TYR A1133  LYS A1137 -1  O  TYR A1133   N  ASN A1126           
SHEET    3 AA4 9 ALA A1259  SER A1264 -1  O  ALA A1259   N  LEU A1136           
SHEET    4 AA4 9 ASP A1246  GLN A1254 -1  N  GLY A1251   O  VAL A1262           
SHEET    5 AA4 9 MET A1237  GLN A1240 -1  N  LEU A1239   O  ILE A1247           
SHEET    6 AA4 9 VAL A1220  MET A1223 -1  N  VAL A1220   O  GLN A1240           
SHEET    7 AA4 9 ARG A1179  VAL A1186 -1  N  VAL A1180   O  VAL A1221           
SHEET    8 AA4 9 LYS A1189  ALA A1194 -1  O  TYR A1191   N  VAL A1184           
SHEET    9 AA4 9 SER A1207  LEU A1209 -1  O  LEU A1209   N  ARG A1192           
SHEET    1 AA5 9 LYS A1204  ILE A1205  0                                        
SHEET    2 AA5 9 ALA A1259  SER A1264 -1  O  ALA A1263   N  LYS A1204           
SHEET    3 AA5 9 ASP A1246  GLN A1254 -1  N  GLY A1251   O  VAL A1262           
SHEET    4 AA5 9 MET A1237  GLN A1240 -1  N  LEU A1239   O  ILE A1247           
SHEET    5 AA5 9 VAL A1220  MET A1223 -1  N  VAL A1220   O  GLN A1240           
SHEET    6 AA5 9 ARG A1179  VAL A1186 -1  N  VAL A1180   O  VAL A1221           
SHEET    7 AA5 9 LYS A1159  ALA A1166 -1  N  ILE A1161   O  ASN A1183           
SHEET    8 AA5 9 TYR A1111  ASN A1115 -1  N  TYR A1111   O  PHE A1160           
SHEET    9 AA5 9 TRP A1282  ILE A1285 -1  O  ILE A1285   N  TYR A1112           
SHEET    1 AA6 2 SER A1142  THR A1145  0                                        
SHEET    2 AA6 2 TYR A1149  SER A1152 -1  O  ASN A1151   N  VAL A1143           
SSBOND   1 CYS A 1235    CYS A 1280                          1555   1555  2.03  
CISPEP   1 GLY A 1138    PRO A 1139          0        -5.44                     
CRYST1   61.363   53.927   62.687  90.00 106.05  90.00 P 1 21 1      2          
ORIGX1      1.000000  0.000000  0.000000        0.00000                         
ORIGX2      0.000000  1.000000  0.000000        0.00000                         
ORIGX3      0.000000  0.000000  1.000000        0.00000                         
SCALE1      0.016297  0.000000  0.004689        0.00000                         
SCALE2      0.000000  0.018544  0.000000        0.00000                         
SCALE3      0.000000  0.000000  0.016600        0.00000                         
ATOM      1  N   ASN A 886     -22.463  16.959  16.140  1.00 37.05           N  
ATOM      2  CA  ASN A 886     -22.507  17.551  14.807  1.00 36.11           C  
ATOM      3  C   ASN A 886     -21.706  16.715  13.814  1.00 36.29           C  
ATOM      4  O   ASN A 886     -20.474  16.730  13.826  1.00 36.56           O  
ATOM      5  CB  ASN A 886     -21.977  18.988  14.836  1.00 38.82           C  
ATOM      6  CG  ASN A 886     -22.143  19.695  13.504  1.00 40.81           C  
ATOM      7  OD1 ASN A 886     -23.031  19.360  12.718  1.00 37.70           O  
ATOM      8  ND2 ASN A 886     -21.287  20.677  13.243  1.00 44.49           N  
ATOM      9  N   HIS A 887     -22.416  15.994  12.950  1.00 27.47           N  
ATOM     10  CA  HIS A 887     -21.781  15.069  12.022  1.00 26.93           C  
ATOM     11  C   HIS A 887     -21.304  15.812  10.780  1.00 25.79           C  
ATOM     12  O   HIS A 887     -22.080  16.525  10.135  1.00 22.74           O  
ATOM     13  CB  HIS A 887     -22.754  13.953  11.644  1.00 23.00           C  
ATOM     14  CG  HIS A 887     -23.316  13.221  12.824  1.00 31.94           C  
ATOM     15  ND1 HIS A 887     -22.528  12.521  13.711  1.00 29.62           N  
ATOM     16  CD2 HIS A 887     -24.589  13.092  13.269  1.00 31.71           C  
ATOM     17  CE1 HIS A 887     -23.291  11.986  14.648  1.00 32.05           C  
ATOM     18  NE2 HIS A 887     -24.546  12.318  14.403  1.00 31.53           N  
ATOM     19  N   LEU A 888     -20.026  15.638  10.447  1.00 26.60           N  
ATOM     20  CA  LEU A 888     -19.390  16.312   9.321  1.00 24.53           C  
ATOM     21  C   LEU A 888     -19.025  15.376   8.181  1.00 28.49           C  
ATOM     22  O   LEU A 888     -19.110  15.769   7.016  1.00 24.42           O  
ATOM     23  CB  LEU A 888     -18.123  17.036   9.790  1.00 31.37           C  
ATOM     24  CG  LEU A 888     -18.293  18.292  10.648  1.00 31.72           C  
ATOM     25  CD1 LEU A 888     -16.939  18.946  10.908  1.00 32.65           C  
ATOM     26  CD2 LEU A 888     -19.258  19.272   9.994  1.00 25.58           C  
ATOM     27  N   ILE A 889     -18.605  14.153   8.491  1.00 25.67           N  
ATOM     28  CA  ILE A 889     -18.194  13.189   7.477  1.00 23.31           C  
ATOM     29  C   ILE A 889     -19.437  12.606   6.819  1.00 20.55           C  
ATOM     30  O   ILE A 889     -20.425  12.300   7.495  1.00 23.70           O  
ATOM     31  CB  ILE A 889     -17.326  12.087   8.115  1.00 25.39           C  
ATOM     32  CG1 ILE A 889     -16.215  12.697   8.978  1.00 31.15           C  
ATOM     33  CG2 ILE A 889     -16.734  11.178   7.050  1.00 27.11           C  
ATOM     34  CD1 ILE A 889     -15.117  13.355   8.191  1.00 28.51           C  
ATOM     35  N   ASP A 890     -19.402  12.447   5.492  1.00 24.21           N  
ATOM     36  CA  ASP A 890     -20.586  11.949   4.791  1.00 21.35           C  
ATOM     37  C   ASP A 890     -20.904  10.505   5.161  1.00 22.38           C  
ATOM     38  O   ASP A 890     -22.071  10.100   5.118  1.00 18.19           O  
ATOM     39  CB  ASP A 890     -20.409  12.090   3.278  1.00 21.58           C  
ATOM     40  CG  ASP A 890     -19.462  11.056   2.688  1.00 29.26           C  
ATOM     41  OD1 ASP A 890     -18.540  10.590   3.393  1.00 36.68           O  
ATOM     42  OD2 ASP A 890     -19.642  10.714   1.502  1.00 35.62           O  
ATOM     43  N   LEU A 891     -19.889   9.718   5.529  1.00 19.19           N  
ATOM     44  CA  LEU A 891     -20.133   8.340   5.941  1.00 20.11           C  
ATOM     45  C   LEU A 891     -20.947   8.255   7.226  1.00 19.48           C  
ATOM     46  O   LEU A 891     -21.548   7.209   7.494  1.00 17.86           O  
ATOM     47  CB  LEU A 891     -18.806   7.596   6.117  1.00 18.18           C  
ATOM     48  CG  LEU A 891     -18.044   7.274   4.830  1.00 20.17           C  
ATOM     49  CD1 LEU A 891     -16.732   6.577   5.139  1.00 21.87           C  
ATOM     50  CD2 LEU A 891     -18.895   6.412   3.919  1.00 19.42           C  
ATOM     51  N   SER A 892     -20.987   9.329   8.022  1.00 19.21           N  
ATOM     52  CA  SER A 892     -21.746   9.318   9.270  1.00 20.01           C  
ATOM     53  C   SER A 892     -23.227   9.040   9.054  1.00 20.73           C  
ATOM     54  O   SER A 892     -23.908   8.617   9.994  1.00 21.18           O  
ATOM     55  CB  SER A 892     -21.583  10.652   9.995  1.00 22.46           C  
ATOM     56  OG  SER A 892     -22.152  11.702   9.232  1.00 19.57           O  
ATOM     57  N   ARG A 893     -23.742   9.295   7.848  1.00 18.86           N  
ATOM     58  CA  ARG A 893     -25.128   8.967   7.524  1.00 21.07           C  
ATOM     59  C   ARG A 893     -25.443   7.499   7.786  1.00 22.00           C  
ATOM     60  O   ARG A 893     -26.567   7.159   8.175  1.00 20.22           O  
ATOM     61  CB  ARG A 893     -25.401   9.317   6.056  1.00 19.42           C  
ATOM     62  CG  ARG A 893     -26.534   8.538   5.408  1.00 23.72           C  
ATOM     63  CD  ARG A 893     -26.794   9.016   3.987  1.00 22.64           C  
ATOM     64  NE  ARG A 893     -27.750  10.118   3.928  1.00 19.19           N  
ATOM     65  CZ  ARG A 893     -27.519  11.279   3.326  1.00 21.01           C  
ATOM     66  NH1 ARG A 893     -28.454  12.220   3.319  1.00 21.21           N  
ATOM     67  NH2 ARG A 893     -26.356  11.504   2.731  1.00 19.33           N  
ATOM     68  N   TYR A 894     -24.463   6.621   7.599  1.00 18.33           N  
ATOM     69  CA  TYR A 894     -24.670   5.183   7.691  1.00 17.37           C  
ATOM     70  C   TYR A 894     -24.139   4.582   8.982  1.00 18.86           C  
ATOM     71  O   TYR A 894     -24.300   3.377   9.200  1.00 22.55           O  
ATOM     72  CB  TYR A 894     -24.005   4.498   6.497  1.00 16.98           C  
ATOM     73  CG  TYR A 894     -24.515   5.030   5.185  1.00 17.39           C  
ATOM     74  CD1 TYR A 894     -25.797   4.732   4.756  1.00 16.94           C  
ATOM     75  CD2 TYR A 894     -23.732   5.862   4.393  1.00 19.33           C  
ATOM     76  CE1 TYR A 894     -26.283   5.222   3.567  1.00 15.21           C  
ATOM     77  CE2 TYR A 894     -24.212   6.364   3.195  1.00 14.38           C  
ATOM     78  CZ  TYR A 894     -25.492   6.035   2.789  1.00 14.63           C  
ATOM     79  OH  TYR A 894     -26.000   6.519   1.605  1.00 16.39           O  
ATOM     80  N   ALA A 895     -23.533   5.387   9.851  1.00 23.91           N  
ATOM     81  CA  ALA A 895     -22.685   4.882  10.918  1.00 19.70           C  
ATOM     82  C   ALA A 895     -23.195   5.293  12.290  1.00 20.99           C  
ATOM     83  O   ALA A 895     -23.748   6.384  12.460  1.00 24.00           O  
ATOM     84  CB  ALA A 895     -21.251   5.384  10.745  1.00 20.68           C  
ATOM     85  N   SER A 896     -23.007   4.402  13.263  1.00 19.56           N  
ATOM     86  CA  SER A 896     -23.053   4.772  14.670  1.00 20.97           C  
ATOM     87  C   SER A 896     -21.682   5.166  15.200  1.00 26.07           C  
ATOM     88  O   SER A 896     -21.597   5.815  16.249  1.00 23.76           O  
ATOM     89  CB  SER A 896     -23.613   3.619  15.508  1.00 23.62           C  
ATOM     90  OG  SER A 896     -22.774   2.482  15.424  1.00 28.15           O  
ATOM     91  N   LYS A 897     -20.615   4.801  14.488  1.00 23.51           N  
ATOM     92  CA  LYS A 897     -19.254   5.161  14.857  1.00 19.11           C  
ATOM     93  C   LYS A 897     -18.368   4.972  13.633  1.00 19.26           C  
ATOM     94  O   LYS A 897     -18.579   4.042  12.853  1.00 20.00           O  
ATOM     95  CB  LYS A 897     -18.749   4.309  16.027  1.00 24.07           C  
ATOM     96  CG  LYS A 897     -17.487   4.842  16.679  1.00 25.51           C  
ATOM     97  CD  LYS A 897     -16.918   3.861  17.690  1.00 34.15           C  
ATOM     98  CE  LYS A 897     -15.621   4.388  18.280  1.00 32.33           C  
ATOM     99  NZ  LYS A 897     -14.795   3.313  18.896  1.00 37.91           N  
ATOM    100  N   ILE A 898     -17.394   5.863  13.457  1.00 18.50           N  
ATOM    101  CA  ILE A 898     -16.446   5.774  12.350  1.00 17.89           C  
ATOM    102  C   ILE A 898     -15.040   5.829  12.927  1.00 20.29           C  
ATOM    103  O   ILE A 898     -14.688   6.794  13.618  1.00 24.46           O  
ATOM    104  CB  ILE A 898     -16.644   6.891  11.312  1.00 16.94           C  
ATOM    105  CG1 ILE A 898     -18.087   6.907  10.816  1.00 20.80           C  
ATOM    106  CG2 ILE A 898     -15.703   6.689  10.135  1.00 23.37           C  
ATOM    107  CD1 ILE A 898     -18.364   7.983   9.796  1.00 22.91           C  
ATOM    108  N   ASN A 899     -14.240   4.804  12.645  1.00 20.94           N  
ATOM    109  CA  ASN A 899     -12.860   4.713  13.108  1.00 18.38           C  
ATOM    110  C   ASN A 899     -11.936   4.978  11.927  1.00 21.01           C  
ATOM    111  O   ASN A 899     -11.951   4.228  10.946  1.00 20.04           O  
ATOM    112  CB  ASN A 899     -12.586   3.340  13.720  1.00 20.71           C  
ATOM    113  CG  ASN A 899     -13.604   2.963  14.778  1.00 23.05           C  
ATOM    114  OD1 ASN A 899     -13.921   3.758  15.659  1.00 24.22           O  
ATOM    115  ND2 ASN A 899     -14.128   1.745  14.690  1.00 22.74           N  
ATOM    116  N   ILE A 900     -11.134   6.037  12.023  1.00 15.02           N  
ATOM    117  CA  ILE A 900     -10.313   6.513  10.914  1.00 19.33           C  
ATOM    118  C   ILE A 900      -8.849   6.348  11.291  1.00 16.38           C  
ATOM    119  O   ILE A 900      -8.389   6.932  12.281  1.00 18.91           O  
ATOM    120  CB  ILE A 900     -10.626   7.977  10.565  1.00 17.00           C  
ATOM    121  CG1 ILE A 900     -12.110   8.138  10.232  1.00 22.00           C  
ATOM    122  CG2 ILE A 900      -9.757   8.449   9.408  1.00 18.81           C  
ATOM    123  CD1 ILE A 900     -12.538   9.571  10.014  1.00 24.64           C  
ATOM    124  N   GLY A 901      -8.115   5.564  10.504  1.00 18.93           N  
ATOM    125  CA  GLY A 901      -6.703   5.377  10.762  1.00 20.08           C  
ATOM    126  C   GLY A 901      -5.893   6.619  10.441  1.00 18.47           C  
ATOM    127  O   GLY A 901      -6.306   7.489   9.674  1.00 17.55           O  
ATOM    128  N   SER A 902      -4.701   6.691  11.039  1.00 18.64           N  
ATOM    129  CA  SER A 902      -3.880   7.890  10.924  1.00 17.59           C  
ATOM    130  C   SER A 902      -3.340   8.106   9.516  1.00 19.40           C  
ATOM    131  O   SER A 902      -2.976   9.238   9.175  1.00 22.36           O  
ATOM    132  CB  SER A 902      -2.722   7.830  11.918  1.00 18.06           C  
ATOM    133  OG  SER A 902      -1.905   6.700  11.675  1.00 18.39           O  
ATOM    134  N   LYS A 903      -3.278   7.062   8.690  1.00 16.12           N  
ATOM    135  CA  LYS A 903      -2.779   7.184   7.327  1.00 16.80           C  
ATOM    136  C   LYS A 903      -3.893   7.345   6.299  1.00 21.74           C  
ATOM    137  O   LYS A 903      -3.672   7.100   5.108  1.00 22.50           O  
ATOM    138  CB  LYS A 903      -1.899   5.988   6.969  1.00 15.72           C  
ATOM    139  CG  LYS A 903      -0.426   6.234   7.227  1.00 20.57           C  
ATOM    140  CD  LYS A 903       0.144   7.271   6.266  1.00 21.36           C  
ATOM    141  CE  LYS A 903       1.652   7.405   6.422  1.00 26.44           C  
ATOM    142  NZ  LYS A 903       2.203   8.465   5.532  1.00 30.58           N  
ATOM    143  N   VAL A 904      -5.082   7.744   6.732  1.00 18.96           N  
ATOM    144  CA  VAL A 904      -6.117   8.187   5.807  1.00 17.85           C  
ATOM    145  C   VAL A 904      -5.891   9.659   5.498  1.00 19.68           C  
ATOM    146  O   VAL A 904      -5.673  10.469   6.409  1.00 19.28           O  
ATOM    147  CB  VAL A 904      -7.513   7.949   6.400  1.00 16.30           C  
ATOM    148  CG1 VAL A 904      -8.580   8.455   5.454  1.00 16.64           C  
ATOM    149  CG2 VAL A 904      -7.705   6.472   6.694  1.00 19.33           C  
ATOM    150  N   ASN A 905      -5.932  10.015   4.216  1.00 16.80           N  
ATOM    151  CA  ASN A 905      -5.664  11.376   3.765  1.00 21.19           C  
ATOM    152  C   ASN A 905      -6.938  11.983   3.194  1.00 21.61           C  
ATOM    153  O   ASN A 905      -7.500  11.457   2.229  1.00 19.35           O  
ATOM    154  CB  ASN A 905      -4.549  11.397   2.720  1.00 19.45           C  
ATOM    155  CG  ASN A 905      -4.312  12.784   2.150  1.00 29.20           C  
ATOM    156  OD1 ASN A 905      -4.215  13.761   2.891  1.00 35.03           O  
ATOM    157  ND2 ASN A 905      -4.236  12.879   0.826  1.00 24.39           N  
ATOM    158  N   PHE A 906      -7.391  13.083   3.791  1.00 19.32           N  
ATOM    159  CA  PHE A 906      -8.538  13.830   3.287  1.00 21.35           C  
ATOM    160  C   PHE A 906      -8.023  15.003   2.462  1.00 22.88           C  
ATOM    161  O   PHE A 906      -7.243  15.819   2.964  1.00 24.08           O  
ATOM    162  CB  PHE A 906      -9.423  14.319   4.436  1.00 19.08           C  
ATOM    163  CG  PHE A 906     -10.152  13.217   5.160  1.00 20.24           C  
ATOM    164  CD1 PHE A 906      -9.521  12.478   6.150  1.00 25.18           C  
ATOM    165  CD2 PHE A 906     -11.474  12.928   4.859  1.00 23.03           C  
ATOM    166  CE1 PHE A 906     -10.191  11.468   6.817  1.00 23.69           C  
ATOM    167  CE2 PHE A 906     -12.149  11.918   5.523  1.00 24.99           C  
ATOM    168  CZ  PHE A 906     -11.506  11.189   6.503  1.00 25.71           C  
ATOM    169  N   ASP A 907      -8.451  15.082   1.205  1.00 19.82           N  
ATOM    170  CA  ASP A 907      -7.929  16.094   0.292  1.00 20.13           C  
ATOM    171  C   ASP A 907      -8.192  17.493   0.847  1.00 21.69           C  
ATOM    172  O   ASP A 907      -9.345  17.833   1.144  1.00 22.69           O  
ATOM    173  CB  ASP A 907      -8.572  15.933  -1.089  1.00 19.69           C  
ATOM    174  CG  ASP A 907      -8.012  16.897  -2.134  1.00 26.75           C  
ATOM    175  OD1 ASP A 907      -7.840  18.102  -1.854  1.00 30.92           O  
ATOM    176  OD2 ASP A 907      -7.756  16.436  -3.265  1.00 32.40           O  
ATOM    177  N   PRO A 908      -7.159  18.333   0.990  1.00 24.59           N  
ATOM    178  CA  PRO A 908      -7.377  19.666   1.579  1.00 25.80           C  
ATOM    179  C   PRO A 908      -8.207  20.596   0.709  1.00 26.27           C  
ATOM    180  O   PRO A 908      -8.856  21.505   1.242  1.00 28.60           O  
ATOM    181  CB  PRO A 908      -5.950  20.201   1.773  1.00 28.05           C  
ATOM    182  CG  PRO A 908      -5.106  19.413   0.822  1.00 30.58           C  
ATOM    183  CD  PRO A 908      -5.736  18.059   0.722  1.00 26.98           C  
ATOM    184  N   ILE A 909      -8.204  20.407  -0.611  1.00 24.20           N  
ATOM    185  CA  ILE A 909      -9.016  21.245  -1.488  1.00 24.56           C  
ATOM    186  C   ILE A 909     -10.461  20.762  -1.518  1.00 28.03           C  
ATOM    187  O   ILE A 909     -11.398  21.566  -1.589  1.00 27.40           O  
ATOM    188  CB  ILE A 909      -8.397  21.278  -2.898  1.00 27.00           C  
ATOM    189  CG1 ILE A 909      -7.020  21.947  -2.857  1.00 32.75           C  
ATOM    190  CG2 ILE A 909      -9.321  21.985  -3.880  1.00 27.74           C  
ATOM    191  CD1 ILE A 909      -7.022  23.321  -2.214  1.00 30.97           C  
ATOM    192  N   ASP A 910     -10.664  19.446  -1.455  1.00 27.26           N  
ATOM    193  CA  ASP A 910     -11.981  18.816  -1.562  1.00 25.95           C  
ATOM    194  C   ASP A 910     -12.058  17.771  -0.448  1.00 22.24           C  
ATOM    195  O   ASP A 910     -11.640  16.625  -0.632  1.00 20.75           O  
ATOM    196  CB  ASP A 910     -12.165  18.207  -2.951  1.00 25.43           C  
ATOM    197  CG  ASP A 910     -13.565  17.674  -3.187  1.00 26.02           C  
ATOM    198  OD1 ASP A 910     -14.378  17.652  -2.240  1.00 26.51           O  
ATOM    199  OD2 ASP A 910     -13.850  17.269  -4.333  1.00 27.08           O  
ATOM    200  N   LYS A 911     -12.600  18.169   0.708  1.00 21.52           N  
ATOM    201  CA  LYS A 911     -12.518  17.355   1.918  1.00 23.48           C  
ATOM    202  C   LYS A 911     -13.312  16.059   1.836  1.00 23.80           C  
ATOM    203  O   LYS A 911     -13.183  15.219   2.732  1.00 24.25           O  
ATOM    204  CB  LYS A 911     -12.993  18.160   3.126  1.00 29.01           C  
ATOM    205  CG  LYS A 911     -14.318  18.861   2.904  1.00 35.73           C  
ATOM    206  CD  LYS A 911     -14.453  20.074   3.807  1.00 41.56           C  
ATOM    207  CE  LYS A 911     -15.583  20.977   3.349  1.00 39.66           C  
ATOM    208  NZ  LYS A 911     -16.837  20.211   3.118  1.00 41.33           N  
ATOM    209  N   ASN A 912     -14.134  15.879   0.810  1.00 19.73           N  
ATOM    210  CA  ASN A 912     -14.861  14.630   0.651  1.00 18.71           C  
ATOM    211  C   ASN A 912     -14.064  13.576  -0.104  1.00 18.56           C  
ATOM    212  O   ASN A 912     -14.501  12.423  -0.169  1.00 18.66           O  
ATOM    213  CB  ASN A 912     -16.189  14.880  -0.064  1.00 18.96           C  
ATOM    214  CG  ASN A 912     -17.148  15.711   0.766  1.00 21.20           C  
ATOM    215  OD1 ASN A 912     -17.447  15.371   1.911  1.00 26.19           O  
ATOM    216  ND2 ASN A 912     -17.637  16.800   0.191  1.00 24.01           N  
ATOM    217  N   GLN A 913     -12.911  13.939  -0.667  1.00 15.30           N  
ATOM    218  CA  GLN A 913     -12.063  12.998  -1.390  1.00 14.67           C  
ATOM    219  C   GLN A 913     -11.081  12.356  -0.415  1.00 16.65           C  
ATOM    220  O   GLN A 913     -10.324  13.058   0.268  1.00 19.55           O  
ATOM    221  CB  GLN A 913     -11.333  13.705  -2.530  1.00 14.97           C  
ATOM    222  CG  GLN A 913     -12.285  14.373  -3.509  1.00 19.45           C  
ATOM    223  CD  GLN A 913     -11.612  14.797  -4.796  1.00 19.58           C  
ATOM    224  OE1 GLN A 913     -12.256  14.885  -5.843  1.00 26.11           O  
ATOM    225  NE2 GLN A 913     -10.314  15.060  -4.729  1.00 23.07           N  
ATOM    226  N   ILE A 914     -11.099  11.025  -0.359  1.00 15.40           N  
ATOM    227  CA  ILE A 914     -10.390  10.248   0.650  1.00 15.69           C  
ATOM    228  C   ILE A 914      -9.357   9.379  -0.049  1.00 15.67           C  
ATOM    229  O   ILE A 914      -9.683   8.674  -1.009  1.00 14.16           O  
ATOM    230  CB  ILE A 914     -11.361   9.376   1.466  1.00 15.41           C  
ATOM    231  CG1 ILE A 914     -12.379  10.254   2.192  1.00 15.45           C  
ATOM    232  CG2 ILE A 914     -10.596   8.489   2.442  1.00 15.96           C  
ATOM    233  CD1 ILE A 914     -13.606   9.508   2.676  1.00 17.83           C  
ATOM    234  N   GLN A 915      -8.120   9.419   0.437  1.00 12.33           N  
ATOM    235  CA  GLN A 915      -7.038   8.632  -0.134  1.00 13.30           C  
ATOM    236  C   GLN A 915      -6.658   7.522   0.833  1.00 16.54           C  
ATOM    237  O   GLN A 915      -6.394   7.781   2.012  1.00 16.64           O  
ATOM    238  CB  GLN A 915      -5.818   9.501  -0.447  1.00 18.51           C  
ATOM    239  CG  GLN A 915      -4.727   8.753  -1.205  1.00 16.69           C  
ATOM    240  CD  GLN A 915      -3.552   9.637  -1.573  1.00 20.91           C  
ATOM    241  OE1 GLN A 915      -3.266  10.626  -0.898  1.00 21.72           O  
ATOM    242  NE2 GLN A 915      -2.870   9.289  -2.658  1.00 15.88           N  
ATOM    243  N   LEU A 916      -6.634   6.294   0.327  1.00 12.53           N  
ATOM    244  CA  LEU A 916      -6.307   5.112   1.111  1.00 15.25           C  
ATOM    245  C   LEU A 916      -5.073   4.465   0.505  1.00 14.60           C  
ATOM    246  O   LEU A 916      -5.082   4.094  -0.674  1.00 16.34           O  
ATOM    247  CB  LEU A 916      -7.478   4.126   1.128  1.00 14.34           C  
ATOM    248  CG  LEU A 916      -8.784   4.640   1.738  1.00 15.00           C  
ATOM    249  CD1 LEU A 916      -9.923   3.662   1.505  1.00 16.47           C  
ATOM    250  CD2 LEU A 916      -8.623   4.921   3.221  1.00 19.37           C  
ATOM    251  N   PHE A 917      -4.018   4.335   1.303  1.00 17.14           N  
ATOM    252  CA  PHE A 917      -2.769   3.744   0.850  1.00 15.03           C  
ATOM    253  C   PHE A 917      -2.729   2.259   1.185  1.00 15.08           C  
ATOM    254  O   PHE A 917      -3.534   1.743   1.962  1.00 16.55           O  
ATOM    255  CB  PHE A 917      -1.568   4.445   1.491  1.00 15.90           C  
ATOM    256  CG  PHE A 917      -1.501   5.917   1.212  1.00 19.69           C  
ATOM    257  CD1 PHE A 917      -0.846   6.395   0.089  1.00 21.17           C  
ATOM    258  CD2 PHE A 917      -2.073   6.824   2.088  1.00 19.65           C  
ATOM    259  CE1 PHE A 917      -0.779   7.757  -0.166  1.00 21.12           C  
ATOM    260  CE2 PHE A 917      -2.008   8.185   1.841  1.00 24.71           C  
ATOM    261  CZ  PHE A 917      -1.358   8.651   0.713  1.00 21.81           C  
ATOM    262  N   ASN A 918      -1.747   1.572   0.604  1.00 15.90           N  
ATOM    263  CA  ASN A 918      -1.512   0.164   0.916  1.00 18.21           C  
ATOM    264  C   ASN A 918      -0.717   0.036   2.219  1.00 18.76           C  
ATOM    265  O   ASN A 918       0.405  -0.469   2.265  1.00 19.36           O  
ATOM    266  CB  ASN A 918      -0.808  -0.530  -0.243  1.00 15.91           C  
ATOM    267  CG  ASN A 918      -0.857  -2.042  -0.126  1.00 17.99           C  
ATOM    268  OD1 ASN A 918      -1.504  -2.581   0.771  1.00 18.32           O  
ATOM    269  ND2 ASN A 918      -0.189  -2.733  -1.044  1.00 17.71           N  
ATOM    270  N   LEU A 919      -1.338   0.512   3.296  1.00 16.47           N  
ATOM    271  CA  LEU A 919      -0.768   0.485   4.635  1.00 20.86           C  
ATOM    272  C   LEU A 919      -1.870   0.101   5.607  1.00 19.92           C  
ATOM    273  O   LEU A 919      -3.025   0.492   5.422  1.00 20.37           O  
ATOM    274  CB  LEU A 919      -0.170   1.846   5.022  1.00 16.35           C  
ATOM    275  CG  LEU A 919       1.063   2.306   4.243  1.00 19.95           C  
ATOM    276  CD1 LEU A 919       1.303   3.794   4.459  1.00 18.71           C  
ATOM    277  CD2 LEU A 919       2.291   1.494   4.645  1.00 23.09           C  
ATOM    278  N   GLU A 920      -1.513  -0.662   6.643  1.00 20.83           N  
ATOM    279  CA  GLU A 920      -2.529  -1.199   7.542  1.00 22.91           C  
ATOM    280  C   GLU A 920      -3.231  -0.122   8.365  1.00 21.23           C  
ATOM    281  O   GLU A 920      -4.354  -0.354   8.828  1.00 22.18           O  
ATOM    282  CB  GLU A 920      -1.910  -2.253   8.460  1.00 22.83           C  
ATOM    283  CG  GLU A 920      -1.685  -3.595   7.781  1.00 25.49           C  
ATOM    284  CD  GLU A 920      -2.959  -4.413   7.667  1.00 39.41           C  
ATOM    285  OE1 GLU A 920      -3.120  -5.135   6.661  1.00 39.15           O  
ATOM    286  OE2 GLU A 920      -3.806  -4.336   8.584  1.00 41.02           O  
ATOM    287  N   SER A 921      -2.614   1.042   8.553  1.00 19.44           N  
ATOM    288  CA  SER A 921      -3.277   2.133   9.256  1.00 20.54           C  
ATOM    289  C   SER A 921      -4.025   3.075   8.321  1.00 17.72           C  
ATOM    290  O   SER A 921      -4.587   4.072   8.788  1.00 19.97           O  
ATOM    291  CB  SER A 921      -2.266   2.930  10.090  1.00 20.56           C  
ATOM    292  OG  SER A 921      -1.310   3.567   9.264  1.00 23.06           O  
ATOM    293  N   SER A 922      -4.049   2.791   7.018  1.00 15.45           N  
ATOM    294  CA  SER A 922      -4.821   3.590   6.066  1.00 16.92           C  
ATOM    295  C   SER A 922      -6.157   2.886   5.843  1.00 16.70           C  
ATOM    296  O   SER A 922      -6.365   2.173   4.861  1.00 17.11           O  
ATOM    297  CB  SER A 922      -4.052   3.780   4.763  1.00 16.81           C  
ATOM    298  OG  SER A 922      -4.696   4.724   3.924  1.00 17.78           O  
ATOM    299  N   LYS A 923      -7.076   3.095   6.784  1.00 16.24           N  
ATOM    300  CA  LYS A 923      -8.342   2.382   6.766  1.00 16.03           C  
ATOM    301  C   LYS A 923      -9.417   3.223   7.437  1.00 17.94           C  
ATOM    302  O   LYS A 923      -9.140   4.002   8.353  1.00 15.77           O  
ATOM    303  CB  LYS A 923      -8.233   1.024   7.470  1.00 16.25           C  
ATOM    304  CG  LYS A 923      -7.979   1.128   8.967  1.00 18.91           C  
ATOM    305  CD  LYS A 923      -7.707  -0.225   9.603  1.00 24.88           C  
ATOM    306  CE  LYS A 923      -7.512  -0.073  11.104  1.00 28.69           C  
ATOM    307  NZ  LYS A 923      -7.230  -1.368  11.781  1.00 30.64           N  
ATOM    308  N   ILE A 924     -10.648   3.059   6.963  1.00 16.34           N  
ATOM    309  CA  ILE A 924     -11.831   3.621   7.600  1.00 13.84           C  
ATOM    310  C   ILE A 924     -12.763   2.464   7.918  1.00 16.59           C  
ATOM    311  O   ILE A 924     -13.135   1.697   7.019  1.00 16.87           O  
ATOM    312  CB  ILE A 924     -12.536   4.657   6.711  1.00 12.84           C  
ATOM    313  CG1 ILE A 924     -11.669   5.903   6.526  1.00 16.84           C  
ATOM    314  CG2 ILE A 924     -13.888   5.025   7.301  1.00 16.62           C  
ATOM    315  CD1 ILE A 924     -12.310   6.959   5.653  1.00 23.54           C  
ATOM    316  N   GLU A 925     -13.132   2.329   9.186  1.00 16.14           N  
ATOM    317  CA  GLU A 925     -14.091   1.323   9.621  1.00 20.42           C  
ATOM    318  C   GLU A 925     -15.392   2.022   9.982  1.00 18.85           C  
ATOM    319  O   GLU A 925     -15.408   2.898  10.853  1.00 18.25           O  
ATOM    320  CB  GLU A 925     -13.568   0.522  10.812  1.00 21.35           C  
ATOM    321  CG  GLU A 925     -14.520  -0.576  11.258  1.00 25.24           C  
ATOM    322  CD  GLU A 925     -14.029  -1.316  12.483  1.00 31.04           C  
ATOM    323  OE1 GLU A 925     -13.547  -0.652  13.423  1.00 32.54           O  
ATOM    324  OE2 GLU A 925     -14.124  -2.562  12.505  1.00 36.41           O  
ATOM    325  N   VAL A 926     -16.471   1.643   9.308  1.00 14.15           N  
ATOM    326  CA  VAL A 926     -17.801   2.169   9.586  1.00 14.38           C  
ATOM    327  C   VAL A 926     -18.569   1.110  10.362  1.00 17.74           C  
ATOM    328  O   VAL A 926     -18.795   0.005   9.858  1.00 17.21           O  
ATOM    329  CB  VAL A 926     -18.538   2.550   8.291  1.00 16.23           C  
ATOM    330  CG1 VAL A 926     -19.985   2.926   8.584  1.00 18.80           C  
ATOM    331  CG2 VAL A 926     -17.824   3.693   7.589  1.00 19.39           C  
ATOM    332  N   ILE A 927     -18.949   1.439  11.594  1.00 16.85           N  
ATOM    333  CA  ILE A 927     -19.863   0.606  12.370  1.00 14.73           C  
ATOM    334  C   ILE A 927     -21.279   0.989  11.952  1.00 19.39           C  
ATOM    335  O   ILE A 927     -21.742   2.092  12.252  1.00 17.32           O  
ATOM    336  CB  ILE A 927     -19.661   0.797  13.877  1.00 18.04           C  
ATOM    337  CG1 ILE A 927     -18.173   0.731  14.249  1.00 22.48           C  
ATOM    338  CG2 ILE A 927     -20.475  -0.225  14.651  1.00 20.99           C  
ATOM    339  CD1 ILE A 927     -17.495  -0.570  13.915  1.00 21.78           C  
ATOM    340  N   LEU A 928     -21.969   0.084  11.263  1.00 17.87           N  
ATOM    341  CA  LEU A 928     -23.231   0.439  10.626  1.00 21.13           C  
ATOM    342  C   LEU A 928     -24.342   0.634  11.649  1.00 20.75           C  
ATOM    343  O   LEU A 928     -24.443  -0.106  12.632  1.00 20.57           O  
ATOM    344  CB  LEU A 928     -23.645  -0.641   9.625  1.00 16.81           C  
ATOM    345  CG  LEU A 928     -22.808  -0.745   8.349  1.00 18.44           C  
ATOM    346  CD1 LEU A 928     -23.172  -1.998   7.564  1.00 17.12           C  
ATOM    347  CD2 LEU A 928     -22.967   0.508   7.493  1.00 17.37           C  
ATOM    348  N   LYS A 929     -25.177   1.645  11.413  1.00 19.78           N  
ATOM    349  CA  LYS A 929     -26.451   1.731  12.112  1.00 19.12           C  
ATOM    350  C   LYS A 929     -27.252   0.463  11.843  1.00 23.10           C  
ATOM    351  O   LYS A 929     -27.217  -0.083  10.738  1.00 21.48           O  
ATOM    352  CB  LYS A 929     -27.238   2.960  11.650  1.00 21.50           C  
ATOM    353  CG  LYS A 929     -26.513   4.291  11.823  1.00 21.70           C  
ATOM    354  CD  LYS A 929     -27.349   5.447  11.283  1.00 26.09           C  
ATOM    355  CE  LYS A 929     -26.740   6.797  11.640  1.00 24.38           C  
ATOM    356  NZ  LYS A 929     -27.408   7.915  10.918  1.00 26.26           N  
ATOM    357  N   ASN A 930     -27.984  -0.002  12.858  1.00 23.25           N  
ATOM    358  CA  ASN A 930     -28.594  -1.327  12.777  1.00 29.36           C  
ATOM    359  C   ASN A 930     -29.539  -1.447  11.586  1.00 28.38           C  
ATOM    360  O   ASN A 930     -29.596  -2.498  10.937  1.00 30.67           O  
ATOM    361  CB  ASN A 930     -29.330  -1.655  14.075  1.00 30.66           C  
ATOM    362  CG  ASN A 930     -29.982  -3.022  14.036  1.00 41.00           C  
ATOM    363  OD1 ASN A 930     -31.202  -3.140  13.921  1.00 43.80           O  
ATOM    364  ND2 ASN A 930     -29.164  -4.068  14.111  1.00 40.22           N  
ATOM    365  N   ALA A 931     -30.273  -0.380  11.270  1.00 28.85           N  
ATOM    366  CA  ALA A 931     -31.208  -0.426  10.152  1.00 34.22           C  
ATOM    367  C   ALA A 931     -30.516  -0.546   8.799  1.00 30.93           C  
ATOM    368  O   ALA A 931     -31.195  -0.804   7.798  1.00 32.66           O  
ATOM    369  CB  ALA A 931     -32.104   0.815  10.171  1.00 36.85           C  
ATOM    370  N   ILE A 932     -29.195  -0.371   8.743  1.00 25.38           N  
ATOM    371  CA  ILE A 932     -28.471  -0.445   7.479  1.00 24.22           C  
ATOM    372  C   ILE A 932     -27.879  -1.831   7.232  1.00 21.98           C  
ATOM    373  O   ILE A 932     -27.624  -2.189   6.073  1.00 27.59           O  
ATOM    374  CB  ILE A 932     -27.373   0.637   7.440  1.00 21.84           C  
ATOM    375  CG1 ILE A 932     -27.980   2.020   7.680  1.00 27.61           C  
ATOM    376  CG2 ILE A 932     -26.653   0.658   6.103  1.00 25.81           C  
ATOM    377  CD1 ILE A 932     -28.995   2.442   6.631  1.00 24.86           C  
ATOM    378  N   VAL A 933     -27.673  -2.628   8.283  1.00 21.58           N  
ATOM    379  CA  VAL A 933     -27.071  -3.947   8.121  1.00 22.74           C  
ATOM    380  C   VAL A 933     -27.935  -4.791   7.200  1.00 23.59           C  
ATOM    381  O   VAL A 933     -29.154  -4.897   7.392  1.00 22.09           O  
ATOM    382  CB  VAL A 933     -26.891  -4.615   9.492  1.00 21.44           C  
ATOM    383  CG1 VAL A 933     -26.362  -6.034   9.334  1.00 21.31           C  
ATOM    384  CG2 VAL A 933     -25.971  -3.778  10.374  1.00 22.56           C  
ATOM    385  N   TYR A 934     -27.314  -5.402   6.191  1.00 21.19           N  
ATOM    386  CA  TYR A 934     -28.042  -6.219   5.228  1.00 19.38           C  
ATOM    387  C   TYR A 934     -28.107  -7.667   5.700  1.00 22.45           C  
ATOM    388  O   TYR A 934     -27.078  -8.278   6.005  1.00 20.16           O  
ATOM    389  CB  TYR A 934     -27.418  -6.153   3.836  1.00 18.20           C  
ATOM    390  CG  TYR A 934     -28.333  -6.782   2.813  1.00 17.15           C  
ATOM    391  CD1 TYR A 934     -28.313  -8.152   2.586  1.00 16.76           C  
ATOM    392  CD2 TYR A 934     -29.250  -6.015   2.112  1.00 15.63           C  
ATOM    393  CE1 TYR A 934     -29.163  -8.736   1.676  1.00 19.56           C  
ATOM    394  CE2 TYR A 934     -30.106  -6.592   1.195  1.00 16.54           C  
ATOM    395  CZ  TYR A 934     -30.057  -7.953   0.982  1.00 14.12           C  
ATOM    396  OH  TYR A 934     -30.907  -8.534   0.070  1.00 16.98           O  
ATOM    397  N   ASN A 935     -29.316  -8.226   5.701  1.00 20.07           N  
ATOM    398  CA  ASN A 935     -29.529  -9.593   6.174  1.00 20.89           C  
ATOM    399  C   ASN A 935     -30.909 -10.017   5.659  1.00 20.75           C  
ATOM    400  O   ASN A 935     -31.918  -9.783   6.318  1.00 20.19           O  
ATOM    401  CB  ASN A 935     -29.441  -9.664   7.686  1.00 24.50           C  
ATOM    402  CG  ASN A 935     -29.608 -11.067   8.216  1.00 25.72           C  
ATOM    403  OD1 ASN A 935     -29.603 -12.036   7.459  1.00 25.36           O  
ATOM    404  ND2 ASN A 935     -29.746 -11.186   9.531  1.00 30.90           N  
ATOM    405  N   SER A 936     -30.932 -10.627   4.472  1.00 18.60           N  
ATOM    406  CA  SER A 936     -32.204 -10.902   3.814  1.00 19.62           C  
ATOM    407  C   SER A 936     -31.994 -11.820   2.618  1.00 18.17           C  
ATOM    408  O   SER A 936     -30.911 -11.859   2.029  1.00 16.99           O  
ATOM    409  CB  SER A 936     -32.880  -9.598   3.356  1.00 19.03           C  
ATOM    410  OG  SER A 936     -34.084  -9.849   2.652  1.00 18.00           O  
ATOM    411  N   MET A 937     -33.055 -12.555   2.269  1.00 15.50           N  
ATOM    412  CA  MET A 937     -33.136 -13.265   0.999  1.00 14.89           C  
ATOM    413  C   MET A 937     -33.845 -12.457  -0.083  1.00 15.02           C  
ATOM    414  O   MET A 937     -33.801 -12.848  -1.255  1.00 16.03           O  
ATOM    415  CB  MET A 937     -33.875 -14.606   1.169  1.00 13.11           C  
ATOM    416  CG  MET A 937     -33.356 -15.524   2.269  1.00 19.20           C  
ATOM    417  SD  MET A 937     -34.195 -17.128   2.269  1.00 16.95           S  
ATOM    418  CE  MET A 937     -33.725 -17.744   0.656  1.00 15.53           C  
ATOM    419  N   TYR A 938     -34.484 -11.340   0.272  1.00 15.42           N  
ATOM    420  CA  TYR A 938     -35.407 -10.660  -0.630  1.00 14.63           C  
ATOM    421  C   TYR A 938     -35.106  -9.192  -0.879  1.00 17.08           C  
ATOM    422  O   TYR A 938     -35.442  -8.691  -1.954  1.00 18.19           O  
ATOM    423  CB  TYR A 938     -36.840 -10.750  -0.090  1.00 17.62           C  
ATOM    424  CG  TYR A 938     -37.324 -12.161   0.101  1.00 16.11           C  
ATOM    425  CD1 TYR A 938     -37.471 -13.011  -0.985  1.00 15.30           C  
ATOM    426  CD2 TYR A 938     -37.640 -12.640   1.363  1.00 19.23           C  
ATOM    427  CE1 TYR A 938     -37.916 -14.304  -0.819  1.00 17.79           C  
ATOM    428  CE2 TYR A 938     -38.089 -13.934   1.541  1.00 20.19           C  
ATOM    429  CZ  TYR A 938     -38.225 -14.761   0.446  1.00 17.98           C  
ATOM    430  OH  TYR A 938     -38.676 -16.053   0.612  1.00 18.84           O  
ATOM    431  N   GLU A 939     -34.510  -8.485   0.074  1.00 17.63           N  
ATOM    432  CA  GLU A 939     -34.434  -7.032  -0.019  1.00 18.05           C  
ATOM    433  C   GLU A 939     -33.485  -6.607  -1.134  1.00 16.82           C  
ATOM    434  O   GLU A 939     -32.300  -6.955  -1.121  1.00 19.10           O  
ATOM    435  CB  GLU A 939     -33.993  -6.439   1.315  1.00 19.05           C  
ATOM    436  CG  GLU A 939     -33.559  -4.982   1.196  1.00 28.92           C  
ATOM    437  CD  GLU A 939     -33.622  -4.237   2.516  1.00 41.10           C  
ATOM    438  OE1 GLU A 939     -34.533  -3.390   2.671  1.00 45.50           O  
ATOM    439  OE2 GLU A 939     -32.762  -4.498   3.390  1.00 49.31           O  
ATOM    440  N   ASN A 940     -34.005  -5.848  -2.095  1.00 15.18           N  
ATOM    441  CA  ASN A 940     -33.161  -5.264  -3.125  1.00 17.24           C  
ATOM    442  C   ASN A 940     -32.285  -4.175  -2.515  1.00 15.34           C  
ATOM    443  O   ASN A 940     -32.686  -3.485  -1.574  1.00 17.10           O  
ATOM    444  CB  ASN A 940     -34.015  -4.672  -4.246  1.00 17.38           C  
ATOM    445  CG  ASN A 940     -34.896  -5.707  -4.930  1.00 19.76           C  
ATOM    446  OD1 ASN A 940     -34.638  -6.911  -4.867  1.00 16.66           O  
ATOM    447  ND2 ASN A 940     -35.943  -5.235  -5.595  1.00 20.02           N  
ATOM    448  N   PHE A 941     -31.076  -4.016  -3.053  1.00 15.98           N  
ATOM    449  CA  PHE A 941     -30.210  -2.967  -2.528  1.00 14.87           C  
ATOM    450  C   PHE A 941     -29.185  -2.555  -3.574  1.00 14.35           C  
ATOM    451  O   PHE A 941     -28.896  -3.288  -4.523  1.00 13.57           O  
ATOM    452  CB  PHE A 941     -29.521  -3.398  -1.226  1.00 15.19           C  
ATOM    453  CG  PHE A 941     -28.392  -4.371  -1.415  1.00 14.90           C  
ATOM    454  CD1 PHE A 941     -28.640  -5.695  -1.735  1.00 17.93           C  
ATOM    455  CD2 PHE A 941     -27.079  -3.964  -1.237  1.00 18.62           C  
ATOM    456  CE1 PHE A 941     -27.597  -6.594  -1.892  1.00 19.07           C  
ATOM    457  CE2 PHE A 941     -26.034  -4.856  -1.391  1.00 15.40           C  
ATOM    458  CZ  PHE A 941     -26.292  -6.170  -1.720  1.00 18.57           C  
ATOM    459  N   SER A 942     -28.641  -1.358  -3.377  1.00 14.33           N  
ATOM    460  CA  SER A 942     -27.724  -0.753  -4.324  1.00 14.85           C  
ATOM    461  C   SER A 942     -26.623  -0.040  -3.555  1.00 14.13           C  
ATOM    462  O   SER A 942     -26.764   0.269  -2.369  1.00 13.34           O  
ATOM    463  CB  SER A 942     -28.436   0.242  -5.256  1.00 13.06           C  
ATOM    464  OG  SER A 942     -29.496  -0.366  -5.977  1.00 19.06           O  
ATOM    465  N   THR A 943     -25.520   0.222  -4.249  1.00 12.69           N  
ATOM    466  CA  THR A 943     -24.434   1.022  -3.704  1.00 11.71           C  
ATOM    467  C   THR A 943     -23.878   1.912  -4.804  1.00 11.20           C  
ATOM    468  O   THR A 943     -23.930   1.569  -5.988  1.00 14.12           O  
ATOM    469  CB  THR A 943     -23.311   0.152  -3.115  1.00 16.57           C  
ATOM    470  OG1 THR A 943     -22.308   1.000  -2.546  1.00 20.02           O  
ATOM    471  CG2 THR A 943     -22.669  -0.703  -4.192  1.00 15.40           C  
ATOM    472  N   SER A 944     -23.353   3.066  -4.405  1.00 12.65           N  
ATOM    473  CA  SER A 944     -22.702   3.961  -5.345  1.00 14.20           C  
ATOM    474  C   SER A 944     -21.498   4.597  -4.667  1.00 11.92           C  
ATOM    475  O   SER A 944     -21.461   4.744  -3.443  1.00 12.31           O  
ATOM    476  CB  SER A 944     -23.658   5.047  -5.873  1.00 13.60           C  
ATOM    477  OG  SER A 944     -24.109   5.894  -4.835  1.00 15.10           O  
ATOM    478  N   PHE A 945     -20.507   4.955  -5.477  1.00 11.01           N  
ATOM    479  CA  PHE A 945     -19.317   5.638  -4.991  1.00  8.82           C  
ATOM    480  C   PHE A 945     -18.530   6.132  -6.195  1.00  9.24           C  
ATOM    481  O   PHE A 945     -18.679   5.619  -7.307  1.00 11.86           O  
ATOM    482  CB  PHE A 945     -18.443   4.727  -4.111  1.00 11.95           C  
ATOM    483  CG  PHE A 945     -17.990   3.463  -4.796  1.00 13.49           C  
ATOM    484  CD1 PHE A 945     -18.774   2.318  -4.764  1.00 11.30           C  
ATOM    485  CD2 PHE A 945     -16.779   3.416  -5.467  1.00 13.10           C  
ATOM    486  CE1 PHE A 945     -18.358   1.152  -5.395  1.00 14.11           C  
ATOM    487  CE2 PHE A 945     -16.357   2.255  -6.100  1.00 14.18           C  
ATOM    488  CZ  PHE A 945     -17.148   1.121  -6.063  1.00 11.99           C  
ATOM    489  N   TRP A 946     -17.708   7.147  -5.959  1.00 13.37           N  
ATOM    490  CA  TRP A 946     -16.734   7.613  -6.933  1.00  9.96           C  
ATOM    491  C   TRP A 946     -15.362   7.075  -6.553  1.00 11.53           C  
ATOM    492  O   TRP A 946     -15.043   6.949  -5.367  1.00 11.45           O  
ATOM    493  CB  TRP A 946     -16.692   9.140  -6.993  1.00 11.80           C  
ATOM    494  CG  TRP A 946     -17.974   9.795  -7.435  1.00 11.11           C  
ATOM    495  CD1 TRP A 946     -19.131   9.902  -6.719  1.00 13.48           C  
ATOM    496  CD2 TRP A 946     -18.202  10.470  -8.674  1.00 13.14           C  
ATOM    497  NE1 TRP A 946     -20.075  10.584  -7.449  1.00 14.91           N  
ATOM    498  CE2 TRP A 946     -19.527  10.946  -8.651  1.00 13.30           C  
ATOM    499  CE3 TRP A 946     -17.416  10.714  -9.806  1.00 13.91           C  
ATOM    500  CZ2 TRP A 946     -20.086  11.650  -9.718  1.00 15.68           C  
ATOM    501  CZ3 TRP A 946     -17.974  11.412 -10.861  1.00 14.11           C  
ATOM    502  CH2 TRP A 946     -19.296  11.871 -10.809  1.00 13.46           C  
ATOM    503  N   ILE A 947     -14.549   6.758  -7.557  1.00  9.96           N  
ATOM    504  CA  ILE A 947     -13.234   6.180  -7.321  1.00 12.29           C  
ATOM    505  C   ILE A 947     -12.268   6.703  -8.372  1.00 11.87           C  
ATOM    506  O   ILE A 947     -12.654   6.999  -9.507  1.00 13.25           O  
ATOM    507  CB  ILE A 947     -13.285   4.632  -7.324  1.00  8.15           C  
ATOM    508  CG1 ILE A 947     -11.976   4.034  -6.811  1.00  8.40           C  
ATOM    509  CG2 ILE A 947     -13.614   4.100  -8.711  1.00 11.09           C  
ATOM    510  CD1 ILE A 947     -12.091   2.568  -6.454  1.00 12.60           C  
ATOM    511  N   ARG A 948     -11.005   6.841  -7.976  1.00 12.11           N  
ATOM    512  CA  ARG A 948      -9.941   7.226  -8.896  1.00 11.39           C  
ATOM    513  C   ARG A 948      -8.765   6.291  -8.680  1.00 12.02           C  
ATOM    514  O   ARG A 948      -8.160   6.293  -7.604  1.00 13.96           O  
ATOM    515  CB  ARG A 948      -9.516   8.682  -8.694  1.00 11.25           C  
ATOM    516  CG  ARG A 948      -8.643   9.196  -9.824  1.00 11.92           C  
ATOM    517  CD  ARG A 948      -8.655  10.717  -9.916  1.00 12.25           C  
ATOM    518  NE  ARG A 948      -7.768  11.379  -8.955  1.00 11.32           N  
ATOM    519  CZ  ARG A 948      -6.485  11.649  -9.177  1.00 18.29           C  
ATOM    520  NH1 ARG A 948      -5.769  12.270  -8.250  1.00 13.36           N  
ATOM    521  NH2 ARG A 948      -5.913  11.303 -10.325  1.00 15.08           N  
ATOM    522  N   ILE A 949      -8.434   5.510  -9.704  1.00 11.27           N  
ATOM    523  CA  ILE A 949      -7.518   4.384  -9.593  1.00 11.06           C  
ATOM    524  C   ILE A 949      -6.244   4.727 -10.369  1.00 10.08           C  
ATOM    525  O   ILE A 949      -6.283   4.830 -11.601  1.00 12.00           O  
ATOM    526  CB  ILE A 949      -8.160   3.096 -10.127  1.00 11.66           C  
ATOM    527  CG1 ILE A 949      -9.448   2.798  -9.363  1.00 10.92           C  
ATOM    528  CG2 ILE A 949      -7.203   1.926 -10.007  1.00 13.64           C  
ATOM    529  CD1 ILE A 949     -10.363   1.822 -10.074  1.00 12.04           C  
ATOM    530  N   PRO A 950      -5.099   4.878  -9.701  1.00 12.26           N  
ATOM    531  CA  PRO A 950      -3.858   5.165 -10.433  1.00 14.04           C  
ATOM    532  C   PRO A 950      -3.502   4.047 -11.400  1.00 12.22           C  
ATOM    533  O   PRO A 950      -3.847   2.881 -11.197  1.00 14.05           O  
ATOM    534  CB  PRO A 950      -2.808   5.302  -9.321  1.00 15.08           C  
ATOM    535  CG  PRO A 950      -3.411   4.696  -8.109  1.00 19.53           C  
ATOM    536  CD  PRO A 950      -4.897   4.784  -8.249  1.00 12.17           C  
ATOM    537  N   LYS A 951      -2.807   4.424 -12.469  1.00 12.26           N  
ATOM    538  CA  LYS A 951      -2.437   3.469 -13.502  1.00 14.02           C  
ATOM    539  C   LYS A 951      -1.597   2.345 -12.912  1.00 16.04           C  
ATOM    540  O   LYS A 951      -0.758   2.566 -12.036  1.00 14.57           O  
ATOM    541  CB  LYS A 951      -1.667   4.172 -14.622  1.00 14.69           C  
ATOM    542  CG  LYS A 951      -1.296   3.268 -15.780  1.00 16.90           C  
ATOM    543  CD  LYS A 951      -0.967   4.066 -17.028  1.00 17.00           C  
ATOM    544  CE  LYS A 951       0.304   4.883 -16.860  1.00 16.03           C  
ATOM    545  NZ  LYS A 951       0.490   5.834 -17.991  1.00 17.84           N  
ATOM    546  N   TYR A 952      -1.858   1.125 -13.367  1.00 15.46           N  
ATOM    547  CA  TYR A 952      -1.059  -0.022 -12.964  1.00 14.35           C  
ATOM    548  C   TYR A 952       0.252   0.003 -13.739  1.00 19.20           C  
ATOM    549  O   TYR A 952       0.248  -0.013 -14.975  1.00 17.11           O  
ATOM    550  CB  TYR A 952      -1.830  -1.319 -13.206  1.00 15.09           C  
ATOM    551  CG  TYR A 952      -3.036  -1.462 -12.303  1.00 15.11           C  
ATOM    552  CD1 TYR A 952      -2.906  -1.981 -11.023  1.00 15.57           C  
ATOM    553  CD2 TYR A 952      -4.298  -1.054 -12.720  1.00 13.70           C  
ATOM    554  CE1 TYR A 952      -3.997  -2.110 -10.187  1.00 17.37           C  
ATOM    555  CE2 TYR A 952      -5.401  -1.179 -11.885  1.00 14.78           C  
ATOM    556  CZ  TYR A 952      -5.240  -1.707 -10.621  1.00 14.25           C  
ATOM    557  OH  TYR A 952      -6.322  -1.839  -9.776  1.00 17.02           O  
ATOM    558  N   PHE A 953       1.369   0.059 -13.013  1.00 21.87           N  
ATOM    559  CA  PHE A 953       2.687   0.214 -13.615  1.00 20.48           C  
ATOM    560  C   PHE A 953       3.504  -1.070 -13.662  1.00 24.26           C  
ATOM    561  O   PHE A 953       4.323  -1.228 -14.570  1.00 27.65           O  
ATOM    562  CB  PHE A 953       3.506   1.270 -12.856  1.00 24.63           C  
ATOM    563  CG  PHE A 953       2.840   2.619 -12.752  1.00 24.67           C  
ATOM    564  CD1 PHE A 953       2.857   3.502 -13.818  1.00 21.75           C  
ATOM    565  CD2 PHE A 953       2.232   3.017 -11.572  1.00 27.21           C  
ATOM    566  CE1 PHE A 953       2.256   4.748 -13.720  1.00 23.07           C  
ATOM    567  CE2 PHE A 953       1.631   4.265 -11.465  1.00 23.62           C  
ATOM    568  CZ  PHE A 953       1.642   5.128 -12.541  1.00 25.68           C  
ATOM    569  N   ASN A 954       3.311  -1.986 -12.715  1.00 20.74           N  
ATOM    570  CA  ASN A 954       4.216  -3.110 -12.518  1.00 28.57           C  
ATOM    571  C   ASN A 954       3.503  -4.436 -12.762  1.00 24.14           C  
ATOM    572  O   ASN A 954       2.295  -4.560 -12.539  1.00 23.58           O  
ATOM    573  CB  ASN A 954       4.802  -3.088 -11.102  1.00 29.61           C  
ATOM    574  CG  ASN A 954       5.623  -1.842 -10.829  1.00 36.65           C  
ATOM    575  OD1 ASN A 954       6.364  -1.365 -11.690  1.00 46.17           O  
ATOM    576  ND2 ASN A 954       5.485  -1.299  -9.625  1.00 40.30           N  
ATOM    577  N   SER A 955       4.273  -5.436 -13.208  1.00 27.26           N  
ATOM    578  CA  SER A 955       3.718  -6.758 -13.487  1.00 21.42           C  
ATOM    579  C   SER A 955       3.187  -7.441 -12.233  1.00 18.36           C  
ATOM    580  O   SER A 955       2.375  -8.367 -12.340  1.00 19.83           O  
ATOM    581  CB  SER A 955       4.774  -7.648 -14.145  1.00 24.23           C  
ATOM    582  OG  SER A 955       5.903  -7.804 -13.302  1.00 28.13           O  
ATOM    583  N   ILE A 956       3.630  -7.000 -11.054  1.00 22.63           N  
ATOM    584  CA  ILE A 956       3.141  -7.534  -9.790  1.00 30.16           C  
ATOM    585  C   ILE A 956       1.632  -7.367  -9.664  1.00 21.74           C  
ATOM    586  O   ILE A 956       0.981  -8.127  -8.939  1.00 26.62           O  
ATOM    587  CB  ILE A 956       3.898  -6.843  -8.630  1.00 32.53           C  
ATOM    588  CG1 ILE A 956       3.673  -7.567  -7.303  1.00 32.93           C  
ATOM    589  CG2 ILE A 956       3.490  -5.381  -8.511  1.00 30.87           C  
ATOM    590  CD1 ILE A 956       4.500  -6.998  -6.160  1.00 38.13           C  
ATOM    591  N   SER A 957       1.057  -6.395 -10.374  1.00 21.81           N  
ATOM    592  CA  SER A 957      -0.367  -6.100 -10.314  1.00 21.65           C  
ATOM    593  C   SER A 957      -1.191  -6.951 -11.269  1.00 20.90           C  
ATOM    594  O   SER A 957      -2.425  -6.942 -11.176  1.00 16.20           O  
ATOM    595  CB  SER A 957      -0.604  -4.618 -10.617  1.00 17.36           C  
ATOM    596  OG  SER A 957      -0.107  -3.802  -9.572  1.00 24.87           O  
ATOM    597  N   LEU A 958      -0.550  -7.671 -12.185  1.00 17.32           N  
ATOM    598  CA  LEU A 958      -1.282  -8.577 -13.053  1.00 20.86           C  
ATOM    599  C   LEU A 958      -1.897  -9.700 -12.228  1.00 21.90           C  
ATOM    600  O   LEU A 958      -1.220 -10.340 -11.416  1.00 28.36           O  
ATOM    601  CB  LEU A 958      -0.362  -9.147 -14.134  1.00 21.37           C  
ATOM    602  CG  LEU A 958       0.242  -8.124 -15.104  1.00 17.14           C  
ATOM    603  CD1 LEU A 958       1.209  -8.795 -16.068  1.00 19.65           C  
ATOM    604  CD2 LEU A 958      -0.848  -7.395 -15.866  1.00 20.13           C  
ATOM    605  N   ASN A 959      -3.194  -9.923 -12.446  1.00 20.05           N  
ATOM    606  CA  ASN A 959      -4.025 -10.861 -11.696  1.00 17.03           C  
ATOM    607  C   ASN A 959      -3.712 -10.867 -10.205  1.00 19.76           C  
ATOM    608  O   ASN A 959      -3.242 -11.874  -9.664  1.00 18.10           O  
ATOM    609  CB  ASN A 959      -3.898 -12.279 -12.249  1.00 17.85           C  
ATOM    610  CG  ASN A 959      -5.064 -13.151 -11.837  1.00 21.76           C  
ATOM    611  OD1 ASN A 959      -6.124 -12.638 -11.473  1.00 22.17           O  
ATOM    612  ND2 ASN A 959      -4.878 -14.464 -11.877  1.00 17.25           N  
ATOM    613  N   ASN A 960      -3.972  -9.746  -9.536  1.00 15.52           N  
ATOM    614  CA  ASN A 960      -3.842  -9.625  -8.084  1.00 14.14           C  
ATOM    615  C   ASN A 960      -5.099  -8.906  -7.599  1.00 14.10           C  
ATOM    616  O   ASN A 960      -5.094  -7.685  -7.420  1.00 17.16           O  
ATOM    617  CB  ASN A 960      -2.556  -8.879  -7.703  1.00 15.96           C  
ATOM    618  CG  ASN A 960      -2.508  -8.492  -6.234  1.00 19.34           C  
ATOM    619  OD1 ASN A 960      -1.970  -7.445  -5.875  1.00 19.23           O  
ATOM    620  ND2 ASN A 960      -3.080  -9.331  -5.379  1.00 20.38           N  
ATOM    621  N   GLU A 961      -6.178  -9.664  -7.405  1.00 13.70           N  
ATOM    622  CA  GLU A 961      -7.417  -9.075  -6.910  1.00 14.00           C  
ATOM    623  C   GLU A 961      -7.254  -8.678  -5.449  1.00 16.32           C  
ATOM    624  O   GLU A 961      -6.857  -9.497  -4.617  1.00 17.95           O  
ATOM    625  CB  GLU A 961      -8.584 -10.053  -7.060  1.00 17.18           C  
ATOM    626  CG  GLU A 961      -9.886  -9.522  -6.472  1.00 17.70           C  
ATOM    627  CD  GLU A 961     -11.074 -10.429  -6.721  1.00 20.61           C  
ATOM    628  OE1 GLU A 961     -10.898 -11.501  -7.338  1.00 22.68           O  
ATOM    629  OE2 GLU A 961     -12.195 -10.062  -6.304  1.00 22.58           O  
ATOM    630  N   TYR A 962      -7.548  -7.418  -5.135  1.00 14.14           N  
ATOM    631  CA  TYR A 962      -7.442  -6.923  -3.771  1.00 11.72           C  
ATOM    632  C   TYR A 962      -8.733  -6.217  -3.387  1.00 11.32           C  
ATOM    633  O   TYR A 962      -9.283  -5.439  -4.170  1.00 14.56           O  
ATOM    634  CB  TYR A 962      -6.231  -5.972  -3.595  1.00 14.71           C  
ATOM    635  CG  TYR A 962      -6.169  -4.788  -4.547  1.00 13.10           C  
ATOM    636  CD1 TYR A 962      -5.679  -4.929  -5.841  1.00 14.56           C  
ATOM    637  CD2 TYR A 962      -6.566  -3.520  -4.136  1.00 14.21           C  
ATOM    638  CE1 TYR A 962      -5.613  -3.849  -6.702  1.00 14.68           C  
ATOM    639  CE2 TYR A 962      -6.501  -2.434  -4.994  1.00 14.26           C  
ATOM    640  CZ  TYR A 962      -6.023  -2.604  -6.272  1.00 13.27           C  
ATOM    641  OH  TYR A 962      -5.965  -1.517  -7.116  1.00 12.69           O  
ATOM    642  N   THR A 963      -9.217  -6.509  -2.183  1.00 12.43           N  
ATOM    643  CA  THR A 963     -10.420  -5.873  -1.665  1.00 12.28           C  
ATOM    644  C   THR A 963     -10.142  -4.406  -1.349  1.00 14.09           C  
ATOM    645  O   THR A 963      -9.036  -4.038  -0.946  1.00 13.12           O  
ATOM    646  CB  THR A 963     -10.892  -6.604  -0.402  1.00 16.89           C  
ATOM    647  OG1 THR A 963     -11.084  -7.992  -0.698  1.00 20.75           O  
ATOM    648  CG2 THR A 963     -12.203  -6.025   0.121  1.00 14.67           C  
ATOM    649  N   ILE A 964     -11.157  -3.557  -1.538  1.00 12.19           N  
ATOM    650  CA  ILE A 964     -11.037  -2.158  -1.132  1.00 11.09           C  
ATOM    651  C   ILE A 964     -12.182  -1.751  -0.207  1.00 12.06           C  
ATOM    652  O   ILE A 964     -11.992  -0.924   0.691  1.00 12.45           O  
ATOM    653  CB  ILE A 964     -10.949  -1.215  -2.349  1.00 10.08           C  
ATOM    654  CG1 ILE A 964     -12.122  -1.427  -3.305  1.00 13.60           C  
ATOM    655  CG2 ILE A 964      -9.614  -1.395  -3.074  1.00 13.21           C  
ATOM    656  CD1 ILE A 964     -12.327  -0.271  -4.261  1.00 12.32           C  
ATOM    657  N   ILE A 965     -13.371  -2.317  -0.412  1.00 13.63           N  
ATOM    658  CA  ILE A 965     -14.528  -2.055   0.442  1.00 12.59           C  
ATOM    659  C   ILE A 965     -15.117  -3.400   0.841  1.00 14.22           C  
ATOM    660  O   ILE A 965     -15.592  -4.148  -0.020  1.00 15.62           O  
ATOM    661  CB  ILE A 965     -15.591  -1.193  -0.257  1.00 13.57           C  
ATOM    662  CG1 ILE A 965     -14.963   0.034  -0.923  1.00 14.17           C  
ATOM    663  CG2 ILE A 965     -16.646  -0.756   0.741  1.00 13.62           C  
ATOM    664  CD1 ILE A 965     -15.969   0.884  -1.672  1.00 16.44           C  
ATOM    665  N   ASN A 966     -15.110  -3.699   2.137  1.00 14.13           N  
ATOM    666  CA  ASN A 966     -15.397  -5.043   2.623  1.00 12.72           C  
ATOM    667  C   ASN A 966     -16.583  -5.013   3.576  1.00 13.95           C  
ATOM    668  O   ASN A 966     -16.519  -4.377   4.635  1.00 15.83           O  
ATOM    669  CB  ASN A 966     -14.168  -5.640   3.312  1.00 14.12           C  
ATOM    670  CG  ASN A 966     -14.285  -7.136   3.510  1.00 21.18           C  
ATOM    671  OD1 ASN A 966     -15.257  -7.749   3.074  1.00 21.83           O  
ATOM    672  ND2 ASN A 966     -13.288  -7.734   4.153  1.00 21.46           N  
ATOM    673  N   CYS A 967     -17.661  -5.696   3.198  1.00 15.20           N  
ATOM    674  CA  CYS A 967     -18.815  -5.931   4.057  1.00 17.59           C  
ATOM    675  C   CYS A 967     -19.118  -7.420   4.129  1.00 18.01           C  
ATOM    676  O   CYS A 967     -20.272  -7.849   4.048  1.00 15.13           O  
ATOM    677  CB  CYS A 967     -20.037  -5.158   3.573  1.00 15.83           C  
ATOM    678  SG  CYS A 967     -21.294  -4.854   4.847  1.00 16.24           S  
ATOM    679  N   MET A 968     -18.069  -8.222   4.260  1.00 17.52           N  
ATOM    680  CA  MET A 968     -18.184  -9.665   4.393  1.00 21.50           C  
ATOM    681  C   MET A 968     -17.995 -10.073   5.845  1.00 20.14           C  
ATOM    682  O   MET A 968     -17.119  -9.551   6.541  1.00 24.07           O  
ATOM    683  CB  MET A 968     -17.144 -10.377   3.529  1.00 16.44           C  
ATOM    684  CG  MET A 968     -17.351 -10.237   2.036  1.00 18.35           C  
ATOM    685  SD  MET A 968     -18.723 -11.242   1.444  1.00 24.12           S  
ATOM    686  CE  MET A 968     -18.643 -10.923  -0.320  1.00 21.93           C  
ATOM    687  N   GLU A 969     -18.815 -11.017   6.294  1.00 21.92           N  
ATOM    688  CA  GLU A 969     -18.643 -11.620   7.607  1.00 25.58           C  
ATOM    689  C   GLU A 969     -18.984 -13.094   7.501  1.00 22.13           C  
ATOM    690  O   GLU A 969     -20.075 -13.444   7.043  1.00 23.18           O  
ATOM    691  CB  GLU A 969     -19.527 -10.952   8.666  1.00 27.30           C  
ATOM    692  CG  GLU A 969     -19.260 -11.448  10.086  1.00 30.69           C  
ATOM    693  CD  GLU A 969     -17.890 -11.035  10.607  1.00 39.41           C  
ATOM    694  OE1 GLU A 969     -16.876 -11.653  10.214  1.00 43.97           O  
ATOM    695  OE2 GLU A 969     -17.826 -10.080  11.407  1.00 43.17           O  
ATOM    696  N   ASN A 970     -18.051 -13.951   7.918  1.00 21.01           N  
ATOM    697  CA  ASN A 970     -18.256 -15.399   7.880  1.00 26.70           C  
ATOM    698  C   ASN A 970     -18.627 -15.862   6.471  1.00 22.80           C  
ATOM    699  O   ASN A 970     -19.547 -16.661   6.280  1.00 27.86           O  
ATOM    700  CB  ASN A 970     -19.316 -15.830   8.897  1.00 28.39           C  
ATOM    701  CG  ASN A 970     -19.342 -17.331   9.115  1.00 34.18           C  
ATOM    702  OD1 ASN A 970     -18.300 -17.987   9.133  1.00 42.35           O  
ATOM    703  ND2 ASN A 970     -20.539 -17.884   9.267  1.00 37.67           N  
ATOM    704  N   ASN A 971     -17.924 -15.319   5.477  1.00 24.35           N  
ATOM    705  CA  ASN A 971     -18.036 -15.706   4.072  1.00 25.85           C  
ATOM    706  C   ASN A 971     -19.386 -15.365   3.451  1.00 23.76           C  
ATOM    707  O   ASN A 971     -19.765 -15.963   2.444  1.00 28.12           O  
ATOM    708  CB  ASN A 971     -17.747 -17.199   3.882  1.00 28.11           C  
ATOM    709  CG  ASN A 971     -16.333 -17.569   4.269  1.00 27.98           C  
ATOM    710  OD1 ASN A 971     -15.371 -16.939   3.826  1.00 33.40           O  
ATOM    711  ND2 ASN A 971     -16.197 -18.586   5.110  1.00 33.95           N  
ATOM    712  N   SER A 972     -20.134 -14.424   4.018  1.00 21.25           N  
ATOM    713  CA  SER A 972     -21.332 -13.912   3.370  1.00 17.13           C  
ATOM    714  C   SER A 972     -21.332 -12.394   3.460  1.00 16.55           C  
ATOM    715  O   SER A 972     -20.752 -11.808   4.377  1.00 19.78           O  
ATOM    716  CB  SER A 972     -22.619 -14.471   3.988  1.00 15.83           C  
ATOM    717  OG  SER A 972     -23.750 -14.045   3.245  1.00 18.96           O  
ATOM    718  N   GLY A 973     -21.987 -11.763   2.488  1.00 16.45           N  
ATOM    719  CA  GLY A 973     -22.034 -10.315   2.415  1.00 16.90           C  
ATOM    720  C   GLY A 973     -21.715  -9.781   1.034  1.00 15.77           C  
ATOM    721  O   GLY A 973     -21.970 -10.448   0.027  1.00 13.63           O  
ATOM    722  N   TRP A 974     -21.155  -8.578   0.966  1.00 14.14           N  
ATOM    723  CA  TRP A 974     -20.765  -7.994  -0.308  1.00 14.18           C  
ATOM    724  C   TRP A 974     -19.399  -7.348  -0.152  1.00 11.60           C  
ATOM    725  O   TRP A 974     -18.964  -7.046   0.959  1.00 13.08           O  
ATOM    726  CB  TRP A 974     -21.795  -6.968  -0.803  1.00  9.29           C  
ATOM    727  CG  TRP A 974     -22.083  -5.838   0.157  1.00 13.57           C  
ATOM    728  CD1 TRP A 974     -23.118  -5.760   1.040  1.00 18.24           C  
ATOM    729  CD2 TRP A 974     -21.342  -4.614   0.300  1.00 14.68           C  
ATOM    730  NE1 TRP A 974     -23.064  -4.574   1.733  1.00 15.16           N  
ATOM    731  CE2 TRP A 974     -21.988  -3.850   1.294  1.00 13.57           C  
ATOM    732  CE3 TRP A 974     -20.198  -4.095  -0.312  1.00 14.11           C  
ATOM    733  CZ2 TRP A 974     -21.520  -2.599   1.696  1.00 15.24           C  
ATOM    734  CZ3 TRP A 974     -19.739  -2.847   0.085  1.00 15.79           C  
ATOM    735  CH2 TRP A 974     -20.398  -2.115   1.079  1.00 15.53           C  
ATOM    736  N   LYS A 975     -18.717  -7.151  -1.280  1.00 13.97           N  
ATOM    737  CA  LYS A 975     -17.433  -6.465  -1.267  1.00 12.75           C  
ATOM    738  C   LYS A 975     -17.156  -5.868  -2.637  1.00 13.21           C  
ATOM    739  O   LYS A 975     -17.624  -6.365  -3.664  1.00 13.00           O  
ATOM    740  CB  LYS A 975     -16.286  -7.400  -0.868  1.00 14.89           C  
ATOM    741  CG  LYS A 975     -16.049  -8.563  -1.825  1.00 15.89           C  
ATOM    742  CD  LYS A 975     -14.864  -9.407  -1.364  1.00 19.87           C  
ATOM    743  CE  LYS A 975     -14.558 -10.527  -2.345  1.00 22.73           C  
ATOM    744  NZ  LYS A 975     -13.324 -11.274  -1.964  1.00 26.48           N  
ATOM    745  N   VAL A 976     -16.374  -4.796  -2.632  1.00 10.47           N  
ATOM    746  CA  VAL A 976     -15.800  -4.227  -3.843  1.00 10.49           C  
ATOM    747  C   VAL A 976     -14.315  -4.551  -3.848  1.00 11.63           C  
ATOM    748  O   VAL A 976     -13.629  -4.380  -2.834  1.00 11.66           O  
ATOM    749  CB  VAL A 976     -16.018  -2.703  -3.933  1.00 11.79           C  
ATOM    750  CG1 VAL A 976     -15.383  -2.158  -5.202  1.00 12.70           C  
ATOM    751  CG2 VAL A 976     -17.497  -2.376  -3.889  1.00 10.99           C  
ATOM    752  N   SER A 977     -13.823  -5.027  -4.983  1.00 11.35           N  
ATOM    753  CA  SER A 977     -12.414  -5.330  -5.135  1.00 12.73           C  
ATOM    754  C   SER A 977     -11.937  -4.757  -6.456  1.00 12.43           C  
ATOM    755  O   SER A 977     -12.735  -4.398  -7.325  1.00 11.97           O  
ATOM    756  CB  SER A 977     -12.144  -6.842  -5.067  1.00 12.77           C  
ATOM    757  OG  SER A 977     -13.001  -7.561  -5.930  1.00 17.73           O  
ATOM    758  N   LEU A 978     -10.619  -4.674  -6.589  1.00 11.12           N  
ATOM    759  CA  LEU A 978      -9.980  -4.208  -7.806  1.00 12.28           C  
ATOM    760  C   LEU A 978      -8.981  -5.251  -8.280  1.00 12.70           C  
ATOM    761  O   LEU A 978      -8.499  -6.080  -7.507  1.00 14.44           O  
ATOM    762  CB  LEU A 978      -9.261  -2.865  -7.602  1.00 10.83           C  
ATOM    763  CG  LEU A 978     -10.084  -1.683  -7.092  1.00  9.79           C  
ATOM    764  CD1 LEU A 978      -9.211  -0.429  -7.006  1.00 11.02           C  
ATOM    765  CD2 LEU A 978     -11.280  -1.457  -8.001  1.00 11.27           C  
ATOM    766  N   ASN A 979      -8.689  -5.199  -9.573  1.00 14.49           N  
ATOM    767  CA  ASN A 979      -7.634  -5.990 -10.186  1.00 15.91           C  
ATOM    768  C   ASN A 979      -7.093  -5.155 -11.337  1.00 17.78           C  
ATOM    769  O   ASN A 979      -7.598  -4.062 -11.611  1.00 15.94           O  
ATOM    770  CB  ASN A 979      -8.162  -7.357 -10.640  1.00 14.81           C  
ATOM    771  CG  ASN A 979      -7.066  -8.406 -10.780  1.00 16.04           C  
ATOM    772  OD1 ASN A 979      -5.888  -8.087 -10.909  1.00 15.35           O  
ATOM    773  ND2 ASN A 979      -7.465  -9.677 -10.752  1.00 16.21           N  
ATOM    774  N   TYR A 980      -6.051  -5.657 -11.999  1.00 15.31           N  
ATOM    775  CA  TYR A 980      -5.489  -4.954 -13.149  1.00 16.70           C  
ATOM    776  C   TYR A 980      -6.582  -4.617 -14.159  1.00 16.16           C  
ATOM    777  O   TYR A 980      -7.180  -5.510 -14.769  1.00 18.85           O  
ATOM    778  CB  TYR A 980      -4.395  -5.812 -13.790  1.00 17.92           C  
ATOM    779  CG  TYR A 980      -3.852  -5.307 -15.112  1.00 14.34           C  
ATOM    780  CD1 TYR A 980      -2.890  -4.305 -15.158  1.00 16.48           C  
ATOM    781  CD2 TYR A 980      -4.273  -5.863 -16.312  1.00 17.73           C  
ATOM    782  CE1 TYR A 980      -2.382  -3.854 -16.366  1.00 17.41           C  
ATOM    783  CE2 TYR A 980      -3.771  -5.421 -17.522  1.00 19.12           C  
ATOM    784  CZ  TYR A 980      -2.829  -4.418 -17.542  1.00 17.99           C  
ATOM    785  OH  TYR A 980      -2.333  -3.982 -18.751  1.00 17.52           O  
ATOM    786  N   GLY A 981      -6.857  -3.319 -14.301  1.00 15.31           N  
ATOM    787  CA  GLY A 981      -7.879  -2.810 -15.199  1.00 15.44           C  
ATOM    788  C   GLY A 981      -9.276  -3.342 -14.946  1.00 16.60           C  
ATOM    789  O   GLY A 981     -10.008  -3.633 -15.896  1.00 16.20           O  
ATOM    790  N   GLU A 982      -9.671  -3.452 -13.677  1.00 12.96           N  
ATOM    791  CA  GLU A 982     -10.927  -4.101 -13.335  1.00 15.86           C  
ATOM    792  C   GLU A 982     -11.476  -3.545 -12.025  1.00 13.10           C  
ATOM    793  O   GLU A 982     -10.723  -3.256 -11.090  1.00 12.87           O  
ATOM    794  CB  GLU A 982     -10.717  -5.619 -13.244  1.00 18.84           C  
ATOM    795  CG  GLU A 982     -11.968  -6.454 -13.145  1.00 17.18           C  
ATOM    796  CD  GLU A 982     -11.675  -7.949 -13.234  1.00 22.06           C  
ATOM    797  OE1 GLU A 982     -12.628  -8.738 -13.385  1.00 27.83           O  
ATOM    798  OE2 GLU A 982     -10.492  -8.339 -13.160  1.00 25.62           O  
ATOM    799  N   ILE A 983     -12.800  -3.384 -11.982  1.00 14.31           N  
ATOM    800  CA  ILE A 983     -13.561  -3.130 -10.760  1.00 11.52           C  
ATOM    801  C   ILE A 983     -14.551  -4.275 -10.593  1.00 13.23           C  
ATOM    802  O   ILE A 983     -15.304  -4.584 -11.526  1.00 14.53           O  
ATOM    803  CB  ILE A 983     -14.309  -1.782 -10.806  1.00 12.67           C  
ATOM    804  CG1 ILE A 983     -13.357  -0.620 -11.098  1.00 12.30           C  
ATOM    805  CG2 ILE A 983     -15.054  -1.536  -9.497  1.00 12.49           C  
ATOM    806  CD1 ILE A 983     -14.070   0.718 -11.240  1.00 13.38           C  
ATOM    807  N   ILE A 984     -14.560  -4.898  -9.413  1.00 13.12           N  
ATOM    808  CA  ILE A 984     -15.308  -6.129  -9.175  1.00 15.38           C  
ATOM    809  C   ILE A 984     -16.278  -5.923  -8.022  1.00 12.92           C  
ATOM    810  O   ILE A 984     -15.889  -5.430  -6.956  1.00 12.32           O  
ATOM    811  CB  ILE A 984     -14.377  -7.317  -8.867  1.00 13.22           C  
ATOM    812  CG1 ILE A 984     -13.341  -7.501  -9.974  1.00 16.61           C  
ATOM    813  CG2 ILE A 984     -15.188  -8.597  -8.698  1.00 14.03           C  
ATOM    814  CD1 ILE A 984     -11.961  -7.833  -9.455  1.00 20.96           C  
ATOM    815  N   TRP A 985     -17.530  -6.315  -8.236  1.00 13.61           N  
ATOM    816  CA  TRP A 985     -18.542  -6.429  -7.194  1.00 10.12           C  
ATOM    817  C   TRP A 985     -18.788  -7.910  -6.957  1.00 14.81           C  
ATOM    818  O   TRP A 985     -18.964  -8.664  -7.915  1.00 13.90           O  
ATOM    819  CB  TRP A 985     -19.839  -5.733  -7.619  1.00 14.00           C  
ATOM    820  CG  TRP A 985     -21.030  -5.929  -6.702  1.00 11.75           C  
ATOM    821  CD1 TRP A 985     -22.088  -6.777  -6.893  1.00 18.34           C  
ATOM    822  CD2 TRP A 985     -21.292  -5.239  -5.470  1.00 11.80           C  
ATOM    823  NE1 TRP A 985     -22.985  -6.658  -5.855  1.00 13.44           N  
ATOM    824  CE2 TRP A 985     -22.518  -5.723  -4.968  1.00 13.71           C  
ATOM    825  CE3 TRP A 985     -20.605  -4.263  -4.743  1.00 16.31           C  
ATOM    826  CZ2 TRP A 985     -23.071  -5.263  -3.770  1.00 13.54           C  
ATOM    827  CZ3 TRP A 985     -21.153  -3.808  -3.554  1.00 11.30           C  
ATOM    828  CH2 TRP A 985     -22.374  -4.304  -3.081  1.00 13.23           C  
ATOM    829  N   THR A 986     -18.789  -8.327  -5.694  1.00 13.95           N  
ATOM    830  CA  THR A 986     -19.020  -9.723  -5.347  1.00 11.97           C  
ATOM    831  C   THR A 986     -20.097  -9.813  -4.277  1.00 11.89           C  
ATOM    832  O   THR A 986     -20.017  -9.126  -3.254  1.00 12.60           O  
ATOM    833  CB  THR A 986     -17.736 -10.404  -4.848  1.00 17.87           C  
ATOM    834  OG1 THR A 986     -16.706 -10.280  -5.838  1.00 14.15           O  
ATOM    835  CG2 THR A 986     -17.989 -11.880  -4.578  1.00 15.99           C  
ATOM    836  N   LEU A 987     -21.103 -10.652  -4.526  1.00 14.69           N  
ATOM    837  CA  LEU A 987     -22.089 -11.054  -3.532  1.00 14.75           C  
ATOM    838  C   LEU A 987     -21.843 -12.507  -3.161  1.00 12.70           C  
ATOM    839  O   LEU A 987     -21.495 -13.318  -4.022  1.00 15.26           O  
ATOM    840  CB  LEU A 987     -23.520 -10.926  -4.062  1.00 15.91           C  
ATOM    841  CG  LEU A 987     -24.184  -9.585  -4.362  1.00 15.44           C  
ATOM    842  CD1 LEU A 987     -25.619  -9.836  -4.822  1.00 15.70           C  
ATOM    843  CD2 LEU A 987     -24.152  -8.666  -3.150  1.00 18.61           C  
ATOM    844  N   GLN A 988     -22.034 -12.843  -1.889  1.00 15.84           N  
ATOM    845  CA  GLN A 988     -21.944 -14.233  -1.464  1.00 17.00           C  
ATOM    846  C   GLN A 988     -23.001 -14.500  -0.408  1.00 19.30           C  
ATOM    847  O   GLN A 988     -23.091 -13.766   0.581  1.00 17.07           O  
ATOM    848  CB  GLN A 988     -20.552 -14.576  -0.916  1.00 18.96           C  
ATOM    849  CG  GLN A 988     -20.387 -16.053  -0.581  1.00 19.84           C  
ATOM    850  CD  GLN A 988     -18.941 -16.446  -0.334  1.00 23.01           C  
ATOM    851  OE1 GLN A 988     -18.016 -15.800  -0.827  1.00 29.16           O  
ATOM    852  NE2 GLN A 988     -18.741 -17.502   0.446  1.00 25.66           N  
ATOM    853  N   ASP A 989     -23.799 -15.544  -0.619  1.00 16.38           N  
ATOM    854  CA  ASP A 989     -24.814 -15.896   0.358  1.00 14.54           C  
ATOM    855  C   ASP A 989     -24.195 -16.744   1.468  1.00 20.98           C  
ATOM    856  O   ASP A 989     -22.989 -17.009   1.492  1.00 22.30           O  
ATOM    857  CB  ASP A 989     -25.999 -16.597  -0.315  1.00 18.82           C  
ATOM    858  CG  ASP A 989     -25.680 -18.006  -0.824  1.00 23.54           C  
ATOM    859  OD1 ASP A 989     -24.607 -18.572  -0.529  1.00 24.16           O  
ATOM    860  OD2 ASP A 989     -26.549 -18.570  -1.525  1.00 25.76           O  
ATOM    861  N   THR A 990     -25.035 -17.185   2.397  1.00 20.41           N  
ATOM    862  CA  THR A 990     -24.564 -18.005   3.502  1.00 22.29           C  
ATOM    863  C   THR A 990     -24.372 -19.469   3.113  1.00 24.59           C  
ATOM    864  O   THR A 990     -24.040 -20.280   3.985  1.00 25.94           O  
ATOM    865  CB  THR A 990     -25.541 -17.893   4.678  1.00 22.71           C  
ATOM    866  OG1 THR A 990     -26.809 -18.441   4.297  1.00 25.15           O  
ATOM    867  CG2 THR A 990     -25.736 -16.431   5.074  1.00 20.28           C  
ATOM    868  N   GLN A 991     -24.551 -19.820   1.832  1.00 27.34           N  
ATOM    869  CA  GLN A 991     -24.507 -21.202   1.358  1.00 27.81           C  
ATOM    870  C   GLN A 991     -23.333 -21.485   0.424  1.00 31.73           C  
ATOM    871  O   GLN A 991     -23.382 -22.462  -0.328  1.00 31.65           O  
ATOM    872  CB  GLN A 991     -25.795 -21.568   0.622  1.00 27.51           C  
ATOM    873  CG  GLN A 991     -27.067 -21.623   1.424  1.00 31.65           C  
ATOM    874  CD  GLN A 991     -28.254 -21.791   0.506  1.00 36.99           C  
ATOM    875  OE1 GLN A 991     -29.106 -20.908   0.397  1.00 32.48           O  
ATOM    876  NE2 GLN A 991     -28.295 -22.918  -0.196  1.00 36.26           N  
ATOM    877  N   GLU A 992     -22.300 -20.645   0.430  1.00 31.88           N  
ATOM    878  CA  GLU A 992     -21.083 -20.765  -0.387  1.00 34.37           C  
ATOM    879  C   GLU A 992     -21.312 -20.386  -1.843  1.00 30.88           C  
ATOM    880  O   GLU A 992     -20.460 -20.705  -2.685  1.00 32.13           O  
ATOM    881  CB  GLU A 992     -20.472 -22.173  -0.374  1.00 39.18           C  
ATOM    882  CG  GLU A 992     -20.184 -22.793   1.006  1.00 45.52           C  
ATOM    883  CD  GLU A 992     -19.217 -22.003   1.893  1.00 49.31           C  
ATOM    884  OE1 GLU A 992     -18.314 -22.652   2.472  1.00 52.78           O  
ATOM    885  OE2 GLU A 992     -19.353 -20.764   2.033  1.00 47.50           O  
ATOM    886  N   ILE A 993     -22.415 -19.725  -2.177  1.00 22.08           N  
ATOM    887  CA  ILE A 993     -22.712 -19.356  -3.554  1.00 21.04           C  
ATOM    888  C   ILE A 993     -22.408 -17.877  -3.729  1.00 20.22           C  
ATOM    889  O   ILE A 993     -22.882 -17.039  -2.950  1.00 19.32           O  
ATOM    890  CB  ILE A 993     -24.171 -19.676  -3.915  1.00 25.92           C  
ATOM    891  CG1 ILE A 993     -24.432 -21.171  -3.739  1.00 23.76           C  
ATOM    892  CG2 ILE A 993     -24.477 -19.251  -5.344  1.00 18.66           C  
ATOM    893  CD1 ILE A 993     -23.599 -22.043  -4.655  1.00 27.86           C  
ATOM    894  N   LYS A 994     -21.606 -17.555  -4.740  1.00 17.13           N  
ATOM    895  CA  LYS A 994     -21.208 -16.182  -4.997  1.00 18.33           C  
ATOM    896  C   LYS A 994     -21.445 -15.836  -6.459  1.00 19.91           C  
ATOM    897  O   LYS A 994     -21.463 -16.710  -7.331  1.00 18.54           O  
ATOM    898  CB  LYS A 994     -19.732 -15.932  -4.633  1.00 22.09           C  
ATOM    899  CG  LYS A 994     -18.730 -16.567  -5.582  1.00 20.71           C  
ATOM    900  CD  LYS A 994     -17.325 -16.006  -5.373  1.00 31.02           C  
ATOM    901  CE  LYS A 994     -16.911 -16.045  -3.910  1.00 25.81           C  
ATOM    902  NZ  LYS A 994     -15.494 -15.614  -3.724  1.00 26.60           N  
ATOM    903  N   GLN A 995     -21.639 -14.545  -6.713  1.00 15.14           N  
ATOM    904  CA  GLN A 995     -21.762 -14.024  -8.064  1.00 15.21           C  
ATOM    905  C   GLN A 995     -21.054 -12.680  -8.131  1.00 13.71           C  
ATOM    906  O   GLN A 995     -21.066 -11.909  -7.169  1.00 16.74           O  
ATOM    907  CB  GLN A 995     -23.229 -13.870  -8.485  1.00 17.89           C  
ATOM    908  CG  GLN A 995     -23.410 -13.372  -9.905  1.00 16.17           C  
ATOM    909  CD  GLN A 995     -22.748 -14.282 -10.917  1.00 20.50           C  
ATOM    910  OE1 GLN A 995     -23.129 -15.445 -11.063  1.00 25.89           O  
ATOM    911  NE2 GLN A 995     -21.749 -13.763 -11.618  1.00 20.74           N  
ATOM    912  N   ARG A 996     -20.432 -12.413  -9.274  1.00 13.62           N  
ATOM    913  CA  ARG A 996     -19.748 -11.157  -9.520  1.00 14.91           C  
ATOM    914  C   ARG A 996     -20.373 -10.440 -10.707  1.00 15.76           C  
ATOM    915  O   ARG A 996     -20.964 -11.061 -11.594  1.00 16.82           O  
ATOM    916  CB  ARG A 996     -18.257 -11.375  -9.807  1.00 14.71           C  
ATOM    917  CG  ARG A 996     -17.478 -12.085  -8.723  1.00 14.72           C  
ATOM    918  CD  ARG A 996     -16.115 -12.477  -9.266  1.00 18.96           C  
ATOM    919  NE  ARG A 996     -15.276 -13.164  -8.293  1.00 18.09           N  
ATOM    920  CZ  ARG A 996     -15.298 -14.477  -8.092  1.00 19.65           C  
ATOM    921  NH1 ARG A 996     -16.131 -15.235  -8.790  1.00 18.69           N  
ATOM    922  NH2 ARG A 996     -14.495 -15.030  -7.192  1.00 20.78           N  
ATOM    923  N   VAL A 997     -20.238  -9.116 -10.707  1.00 13.13           N  
ATOM    924  CA  VAL A 997     -20.379  -8.304 -11.910  1.00 12.15           C  
ATOM    925  C   VAL A 997     -19.175  -7.377 -11.963  1.00 15.23           C  
ATOM    926  O   VAL A 997     -18.678  -6.924 -10.924  1.00 14.32           O  
ATOM    927  CB  VAL A 997     -21.705  -7.509 -11.958  1.00 16.95           C  
ATOM    928  CG1 VAL A 997     -22.901  -8.454 -11.976  1.00 17.58           C  
ATOM    929  CG2 VAL A 997     -21.811  -6.530 -10.803  1.00 14.95           C  
ATOM    930  N   VAL A 998     -18.684  -7.117 -13.169  1.00 11.66           N  
ATOM    931  CA  VAL A 998     -17.341  -6.586 -13.350  1.00 14.61           C  
ATOM    932  C   VAL A 998     -17.335  -5.521 -14.436  1.00 14.44           C  
ATOM    933  O   VAL A 998     -18.050  -5.635 -15.438  1.00 14.90           O  
ATOM    934  CB  VAL A 998     -16.371  -7.735 -13.689  1.00 18.39           C  
ATOM    935  CG1 VAL A 998     -15.102  -7.207 -14.303  1.00 23.74           C  
ATOM    936  CG2 VAL A 998     -16.084  -8.550 -12.441  1.00 15.93           C  
ATOM    937  N   PHE A 999     -16.540  -4.474 -14.221  1.00 13.89           N  
ATOM    938  CA  PHE A 999     -16.186  -3.510 -15.254  1.00 14.45           C  
ATOM    939  C   PHE A 999     -14.702  -3.648 -15.567  1.00 14.78           C  
ATOM    940  O   PHE A 999     -13.869  -3.626 -14.656  1.00 14.70           O  
ATOM    941  CB  PHE A 999     -16.510  -2.085 -14.804  1.00 14.22           C  
ATOM    942  CG  PHE A 999     -15.907  -1.019 -15.672  1.00 15.85           C  
ATOM    943  CD1 PHE A 999     -16.291  -0.884 -16.996  1.00 16.49           C  
ATOM    944  CD2 PHE A 999     -14.975  -0.133 -15.154  1.00 17.21           C  
ATOM    945  CE1 PHE A 999     -15.742   0.102 -17.792  1.00 18.03           C  
ATOM    946  CE2 PHE A 999     -14.426   0.857 -15.945  1.00 18.71           C  
ATOM    947  CZ  PHE A 999     -14.808   0.973 -17.265  1.00 17.26           C  
ATOM    948  N   LYS A1000     -14.373  -3.803 -16.846  1.00 16.07           N  
ATOM    949  CA  LYS A1000     -12.988  -3.929 -17.283  1.00 16.31           C  
ATOM    950  C   LYS A1000     -12.634  -2.767 -18.200  1.00 18.85           C  
ATOM    951  O   LYS A1000     -13.432  -2.375 -19.058  1.00 17.44           O  
ATOM    952  CB  LYS A1000     -12.749  -5.266 -17.996  1.00 20.20           C  
ATOM    953  CG  LYS A1000     -12.887  -6.466 -17.063  1.00 20.04           C  
ATOM    954  CD  LYS A1000     -12.827  -7.807 -17.786  1.00 25.27           C  
ATOM    955  CE  LYS A1000     -11.400  -8.254 -18.054  1.00 29.48           C  
ATOM    956  NZ  LYS A1000     -11.341  -9.718 -18.322  1.00 30.42           N  
ATOM    957  N   TYR A1001     -11.443  -2.208 -18.001  1.00 15.16           N  
ATOM    958  CA  TYR A1001     -10.931  -1.129 -18.831  1.00 16.72           C  
ATOM    959  C   TYR A1001      -9.493  -1.436 -19.217  1.00 14.35           C  
ATOM    960  O   TYR A1001      -8.709  -1.922 -18.395  1.00 14.91           O  
ATOM    961  CB  TYR A1001     -11.013   0.235 -18.118  1.00 16.65           C  
ATOM    962  CG  TYR A1001     -10.270   0.331 -16.799  1.00 16.34           C  
ATOM    963  CD1 TYR A1001     -10.855  -0.100 -15.615  1.00 13.87           C  
ATOM    964  CD2 TYR A1001      -8.996   0.886 -16.733  1.00 18.01           C  
ATOM    965  CE1 TYR A1001     -10.187  -0.002 -14.406  1.00 14.96           C  
ATOM    966  CE2 TYR A1001      -8.320   0.986 -15.527  1.00 13.59           C  
ATOM    967  CZ  TYR A1001      -8.921   0.540 -14.368  1.00 18.02           C  
ATOM    968  OH  TYR A1001      -8.251   0.637 -13.170  1.00 18.54           O  
ATOM    969  N   SER A1002      -9.158  -1.155 -20.472  1.00 17.89           N  
ATOM    970  CA  SER A1002      -7.832  -1.447 -20.994  1.00 18.37           C  
ATOM    971  C   SER A1002      -6.841  -0.351 -20.620  1.00 16.00           C  
ATOM    972  O   SER A1002      -7.200   0.821 -20.477  1.00 19.14           O  
ATOM    973  CB  SER A1002      -7.884  -1.600 -22.515  1.00 19.42           C  
ATOM    974  OG  SER A1002      -6.595  -1.806 -23.058  1.00 20.19           O  
ATOM    975  N   GLN A1003      -5.580  -0.744 -20.451  1.00 14.58           N  
ATOM    976  CA  GLN A1003      -4.493   0.216 -20.335  1.00 16.12           C  
ATOM    977  C   GLN A1003      -3.695   0.330 -21.627  1.00 18.96           C  
ATOM    978  O   GLN A1003      -2.670   1.018 -21.655  1.00 17.23           O  
ATOM    979  CB  GLN A1003      -3.573  -0.144 -19.163  1.00 15.72           C  
ATOM    980  CG  GLN A1003      -4.252  -0.033 -17.802  1.00 17.43           C  
ATOM    981  CD  GLN A1003      -3.273   0.152 -16.655  1.00 16.72           C  
ATOM    982  OE1 GLN A1003      -3.641   0.646 -15.587  1.00 14.66           O  
ATOM    983  NE2 GLN A1003      -2.021  -0.239 -16.868  1.00 16.70           N  
ATOM    984  N   MET A1004      -4.151  -0.324 -22.693  1.00 17.48           N  
ATOM    985  CA  MET A1004      -3.553  -0.234 -24.023  1.00 21.77           C  
ATOM    986  C   MET A1004      -4.471   0.643 -24.869  1.00 19.93           C  
ATOM    987  O   MET A1004      -5.258   0.158 -25.684  1.00 27.34           O  
ATOM    988  CB  MET A1004      -3.372  -1.626 -24.640  1.00 21.15           C  
ATOM    989  CG  MET A1004      -2.753  -2.638 -23.699  1.00 27.25           C  
ATOM    990  SD  MET A1004      -1.066  -2.174 -23.273  1.00 27.26           S  
ATOM    991  CE  MET A1004      -0.221  -2.533 -24.811  1.00 30.74           C  
ATOM    992  N   ILE A1005      -4.361   1.953 -24.669  1.00 19.61           N  
ATOM    993  CA  ILE A1005      -5.296   2.906 -25.257  1.00 19.66           C  
ATOM    994  C   ILE A1005      -4.636   4.278 -25.235  1.00 21.02           C  
ATOM    995  O   ILE A1005      -3.935   4.627 -24.280  1.00 18.89           O  
ATOM    996  CB  ILE A1005      -6.650   2.882 -24.503  1.00 22.07           C  
ATOM    997  CG1 ILE A1005      -7.692   3.766 -25.186  1.00 25.05           C  
ATOM    998  CG2 ILE A1005      -6.472   3.271 -23.037  1.00 21.83           C  
ATOM    999  CD1 ILE A1005      -9.032   3.769 -24.471  1.00 28.33           C  
ATOM   1000  N   ASN A1006      -4.846   5.050 -26.307  1.00 20.83           N  
ATOM   1001  CA  ASN A1006      -4.178   6.343 -26.440  1.00 23.34           C  
ATOM   1002  C   ASN A1006      -4.575   7.290 -25.312  1.00 22.29           C  
ATOM   1003  O   ASN A1006      -3.721   7.803 -24.581  1.00 20.37           O  
ATOM   1004  CB  ASN A1006      -4.494   6.967 -27.803  1.00 25.41           C  
ATOM   1005  CG  ASN A1006      -3.649   6.392 -28.924  1.00 33.15           C  
ATOM   1006  OD1 ASN A1006      -3.073   5.311 -28.795  1.00 35.08           O  
ATOM   1007  ND2 ASN A1006      -3.565   7.120 -30.033  1.00 34.02           N  
ATOM   1008  N   ILE A1007      -5.873   7.547 -25.172  1.00 22.23           N  
ATOM   1009  CA  ILE A1007      -6.405   8.400 -24.115  1.00 22.01           C  
ATOM   1010  C   ILE A1007      -7.564   7.654 -23.474  1.00 21.51           C  
ATOM   1011  O   ILE A1007      -8.555   7.350 -24.149  1.00 23.81           O  
ATOM   1012  CB  ILE A1007      -6.873   9.767 -24.643  1.00 23.74           C  
ATOM   1013  CG1 ILE A1007      -5.809  10.405 -25.541  1.00 26.47           C  
ATOM   1014  CG2 ILE A1007      -7.227  10.689 -23.484  1.00 24.07           C  
ATOM   1015  CD1 ILE A1007      -4.667  11.023 -24.789  1.00 28.96           C  
ATOM   1016  N   SER A1008      -7.442   7.353 -22.185  1.00 19.57           N  
ATOM   1017  CA  SER A1008      -8.447   6.579 -21.468  1.00 17.08           C  
ATOM   1018  C   SER A1008      -9.410   7.491 -20.726  1.00 18.17           C  
ATOM   1019  O   SER A1008      -9.000   8.481 -20.113  1.00 17.02           O  
ATOM   1020  CB  SER A1008      -7.802   5.622 -20.466  1.00 17.17           C  
ATOM   1021  OG  SER A1008      -8.804   5.005 -19.674  1.00 17.81           O  
ATOM   1022  N   ASP A1009     -10.695   7.137 -20.773  1.00 16.26           N  
ATOM   1023  CA  ASP A1009     -11.693   7.788 -19.938  1.00 19.91           C  
ATOM   1024  C   ASP A1009     -11.578   7.383 -18.476  1.00 17.08           C  
ATOM   1025  O   ASP A1009     -12.171   8.047 -17.619  1.00 16.65           O  
ATOM   1026  CB  ASP A1009     -13.103   7.453 -20.440  1.00 21.19           C  
ATOM   1027  CG  ASP A1009     -13.453   8.167 -21.737  1.00 30.58           C  
ATOM   1028  OD1 ASP A1009     -12.885   9.248 -21.998  1.00 31.26           O  
ATOM   1029  OD2 ASP A1009     -14.301   7.646 -22.492  1.00 36.30           O  
ATOM   1030  N   TYR A1010     -10.825   6.328 -18.170  1.00 15.75           N  
ATOM   1031  CA  TYR A1010     -10.930   5.671 -16.874  1.00 15.53           C  
ATOM   1032  C   TYR A1010      -9.636   5.629 -16.079  1.00 14.85           C  
ATOM   1033  O   TYR A1010      -9.680   5.744 -14.851  1.00 16.89           O  
ATOM   1034  CB  TYR A1010     -11.459   4.245 -17.070  1.00 16.88           C  
ATOM   1035  CG  TYR A1010     -12.714   4.213 -17.900  1.00 16.55           C  
ATOM   1036  CD1 TYR A1010     -13.905   4.720 -17.399  1.00 15.65           C  
ATOM   1037  CD2 TYR A1010     -12.709   3.699 -19.190  1.00 18.83           C  
ATOM   1038  CE1 TYR A1010     -15.060   4.709 -18.153  1.00 19.81           C  
ATOM   1039  CE2 TYR A1010     -13.869   3.682 -19.955  1.00 20.01           C  
ATOM   1040  CZ  TYR A1010     -15.039   4.191 -19.428  1.00 23.41           C  
ATOM   1041  OH  TYR A1010     -16.198   4.185 -20.173  1.00 24.12           O  
ATOM   1042  N   ILE A1011      -8.484   5.466 -16.731  1.00 13.25           N  
ATOM   1043  CA  ILE A1011      -7.229   5.312 -15.997  1.00 12.82           C  
ATOM   1044  C   ILE A1011      -6.922   6.592 -15.232  1.00 13.91           C  
ATOM   1045  O   ILE A1011      -6.739   7.658 -15.830  1.00 15.47           O  
ATOM   1046  CB  ILE A1011      -6.080   4.961 -16.946  1.00 18.39           C  
ATOM   1047  CG1 ILE A1011      -6.383   3.680 -17.724  1.00 17.71           C  
ATOM   1048  CG2 ILE A1011      -4.788   4.808 -16.169  1.00 16.92           C  
ATOM   1049  CD1 ILE A1011      -5.376   3.394 -18.810  1.00 19.47           C  
ATOM   1050  N   ASN A1012      -6.854   6.485 -13.903  1.00 11.61           N  
ATOM   1051  CA  ASN A1012      -6.459   7.576 -13.014  1.00 12.21           C  
ATOM   1052  C   ASN A1012      -7.416   8.761 -13.071  1.00 13.13           C  
ATOM   1053  O   ASN A1012      -7.041   9.879 -12.709  1.00 10.91           O  
ATOM   1054  CB  ASN A1012      -5.033   8.051 -13.316  1.00 13.06           C  
ATOM   1055  CG  ASN A1012      -4.403   8.781 -12.149  1.00 13.30           C  
ATOM   1056  OD1 ASN A1012      -4.595   8.407 -10.989  1.00 13.06           O  
ATOM   1057  ND2 ASN A1012      -3.650   9.837 -12.447  1.00 12.55           N  
ATOM   1058  N   ARG A1013      -8.644   8.548 -13.527  1.00 11.22           N  
ATOM   1059  CA  ARG A1013      -9.641   9.602 -13.615  1.00 12.03           C  
ATOM   1060  C   ARG A1013     -10.844   9.208 -12.773  1.00 14.18           C  
ATOM   1061  O   ARG A1013     -11.136   8.022 -12.612  1.00 14.12           O  
ATOM   1062  CB  ARG A1013     -10.058   9.846 -15.072  1.00 13.32           C  
ATOM   1063  CG  ARG A1013      -8.884  10.227 -15.968  1.00 11.80           C  
ATOM   1064  CD  ARG A1013      -9.295  10.355 -17.422  1.00 15.29           C  
ATOM   1065  NE  ARG A1013      -9.973  11.620 -17.686  1.00 16.98           N  
ATOM   1066  CZ  ARG A1013     -10.407  12.005 -18.881  1.00 24.57           C  
ATOM   1067  NH1 ARG A1013     -10.245  11.220 -19.938  1.00 20.39           N  
ATOM   1068  NH2 ARG A1013     -11.010  13.179 -19.020  1.00 20.20           N  
ATOM   1069  N   TRP A1014     -11.536  10.207 -12.222  1.00 11.28           N  
ATOM   1070  CA  TRP A1014     -12.671   9.918 -11.352  1.00 14.35           C  
ATOM   1071  C   TRP A1014     -13.751   9.156 -12.110  1.00 12.83           C  
ATOM   1072  O   TRP A1014     -14.148   9.545 -13.213  1.00 16.32           O  
ATOM   1073  CB  TRP A1014     -13.243  11.211 -10.760  1.00 14.97           C  
ATOM   1074  CG  TRP A1014     -12.481  11.704  -9.565  1.00 16.39           C  
ATOM   1075  CD1 TRP A1014     -11.604  12.748  -9.524  1.00 12.24           C  
ATOM   1076  CD2 TRP A1014     -12.520  11.161  -8.238  1.00 13.60           C  
ATOM   1077  NE1 TRP A1014     -11.100  12.894  -8.254  1.00 14.46           N  
ATOM   1078  CE2 TRP A1014     -11.645  11.932  -7.446  1.00 15.62           C  
ATOM   1079  CE3 TRP A1014     -13.210  10.099  -7.645  1.00 14.83           C  
ATOM   1080  CZ2 TRP A1014     -11.442  11.674  -6.091  1.00 14.08           C  
ATOM   1081  CZ3 TRP A1014     -13.007   9.845  -6.300  1.00 10.80           C  
ATOM   1082  CH2 TRP A1014     -12.133  10.630  -5.538  1.00 13.64           C  
ATOM   1083  N   ILE A1015     -14.210   8.057 -11.510  1.00 12.55           N  
ATOM   1084  CA  ILE A1015     -15.207   7.159 -12.083  1.00 15.11           C  
ATOM   1085  C   ILE A1015     -16.379   7.085 -11.120  1.00 12.25           C  
ATOM   1086  O   ILE A1015     -16.181   6.851  -9.924  1.00 10.47           O  
ATOM   1087  CB  ILE A1015     -14.639   5.744 -12.313  1.00 12.17           C  
ATOM   1088  CG1 ILE A1015     -13.496   5.758 -13.324  1.00 16.01           C  
ATOM   1089  CG2 ILE A1015     -15.744   4.787 -12.757  1.00 16.55           C  
ATOM   1090  CD1 ILE A1015     -12.761   4.434 -13.410  1.00 14.96           C  
ATOM   1091  N   PHE A1016     -17.593   7.253 -11.631  1.00 12.34           N  
ATOM   1092  CA  PHE A1016     -18.788   7.036 -10.826  1.00 12.88           C  
ATOM   1093  C   PHE A1016     -19.258   5.596 -11.013  1.00 13.84           C  
ATOM   1094  O   PHE A1016     -19.573   5.185 -12.135  1.00 12.83           O  
ATOM   1095  CB  PHE A1016     -19.895   8.020 -11.202  1.00 10.46           C  
ATOM   1096  CG  PHE A1016     -21.131   7.883 -10.361  1.00 13.76           C  
ATOM   1097  CD1 PHE A1016     -21.042   7.887  -8.978  1.00 13.48           C  
ATOM   1098  CD2 PHE A1016     -22.376   7.731 -10.947  1.00 13.87           C  
ATOM   1099  CE1 PHE A1016     -22.172   7.756  -8.194  1.00 13.93           C  
ATOM   1100  CE2 PHE A1016     -23.513   7.598 -10.167  1.00 14.20           C  
ATOM   1101  CZ  PHE A1016     -23.409   7.610  -8.789  1.00 12.05           C  
ATOM   1102  N   VAL A1017     -19.305   4.834  -9.921  1.00 10.39           N  
ATOM   1103  CA  VAL A1017     -19.696   3.425  -9.939  1.00  9.67           C  
ATOM   1104  C   VAL A1017     -21.037   3.274  -9.233  1.00 13.68           C  
ATOM   1105  O   VAL A1017     -21.241   3.835  -8.152  1.00 12.59           O  
ATOM   1106  CB  VAL A1017     -18.635   2.534  -9.268  1.00  9.39           C  
ATOM   1107  CG1 VAL A1017     -19.070   1.070  -9.292  1.00 13.04           C  
ATOM   1108  CG2 VAL A1017     -17.290   2.697  -9.950  1.00 12.57           C  
ATOM   1109  N   THR A1018     -21.943   2.507  -9.835  1.00 12.57           N  
ATOM   1110  CA  THR A1018     -23.206   2.173  -9.188  1.00 11.54           C  
ATOM   1111  C   THR A1018     -23.491   0.700  -9.425  1.00 13.96           C  
ATOM   1112  O   THR A1018     -23.435   0.226 -10.565  1.00 12.05           O  
ATOM   1113  CB  THR A1018     -24.373   3.027  -9.710  1.00 15.54           C  
ATOM   1114  OG1 THR A1018     -24.000   4.411  -9.724  1.00 19.08           O  
ATOM   1115  CG2 THR A1018     -25.591   2.856  -8.812  1.00 15.02           C  
ATOM   1116  N   ILE A1019     -23.778  -0.025  -8.350  1.00 12.07           N  
ATOM   1117  CA  ILE A1019     -24.148  -1.432  -8.424  1.00 13.94           C  
ATOM   1118  C   ILE A1019     -25.532  -1.569  -7.820  1.00 16.03           C  
ATOM   1119  O   ILE A1019     -25.772  -1.111  -6.696  1.00 13.96           O  
ATOM   1120  CB  ILE A1019     -23.138  -2.342  -7.701  1.00 14.59           C  
ATOM   1121  CG1 ILE A1019     -21.771  -2.270  -8.384  1.00 16.25           C  
ATOM   1122  CG2 ILE A1019     -23.630  -3.788  -7.688  1.00 14.38           C  
ATOM   1123  CD1 ILE A1019     -20.647  -1.845  -7.455  1.00 18.91           C  
ATOM   1124  N   THR A1020     -26.448  -2.166  -8.570  1.00 15.72           N  
ATOM   1125  CA  THR A1020     -27.804  -2.399  -8.103  1.00 13.25           C  
ATOM   1126  C   THR A1020     -28.042  -3.899  -8.043  1.00 14.20           C  
ATOM   1127  O   THR A1020     -27.537  -4.650  -8.887  1.00 14.98           O  
ATOM   1128  CB  THR A1020     -28.841  -1.732  -9.014  1.00 15.67           C  
ATOM   1129  OG1 THR A1020     -28.845  -2.377 -10.295  1.00 17.58           O  
ATOM   1130  CG2 THR A1020     -28.532  -0.231  -9.186  1.00 15.17           C  
ATOM   1131  N   ASN A1021     -28.808  -4.335  -7.046  1.00 14.33           N  
ATOM   1132  CA  ASN A1021     -29.034  -5.756  -6.815  1.00 14.72           C  
ATOM   1133  C   ASN A1021     -30.519  -6.019  -6.623  1.00 16.05           C  
ATOM   1134  O   ASN A1021     -31.122  -5.540  -5.655  1.00 16.18           O  
ATOM   1135  CB  ASN A1021     -28.225  -6.244  -5.612  1.00 14.20           C  
ATOM   1136  CG  ASN A1021     -26.743  -5.940  -5.756  1.00 15.02           C  
ATOM   1137  OD1 ASN A1021     -25.990  -6.732  -6.323  1.00 14.75           O  
ATOM   1138  ND2 ASN A1021     -26.323  -4.781  -5.260  1.00 18.39           N  
ATOM   1139  N   ASN A1022     -31.102  -6.777  -7.547  1.00 16.73           N  
ATOM   1140  CA  ASN A1022     -32.497  -7.201  -7.489  1.00 16.38           C  
ATOM   1141  C   ASN A1022     -32.473  -8.693  -7.180  1.00 13.37           C  
ATOM   1142  O   ASN A1022     -32.005  -9.494  -7.997  1.00 13.71           O  
ATOM   1143  CB  ASN A1022     -33.214  -6.881  -8.805  1.00 22.38           C  
ATOM   1144  CG  ASN A1022     -34.695  -7.231  -8.785  1.00 17.45           C  
ATOM   1145  OD1 ASN A1022     -35.097  -8.272  -8.274  1.00 19.28           O  
ATOM   1146  ND2 ASN A1022     -35.517  -6.346  -9.344  1.00 21.25           N  
ATOM   1147  N   ARG A1023     -32.955  -9.058  -5.990  1.00 14.88           N  
ATOM   1148  CA  ARG A1023     -32.722 -10.400  -5.465  1.00 15.10           C  
ATOM   1149  C   ARG A1023     -33.372 -11.481  -6.319  1.00 17.46           C  
ATOM   1150  O   ARG A1023     -32.856 -12.602  -6.391  1.00 18.32           O  
ATOM   1151  CB  ARG A1023     -33.225 -10.490  -4.024  1.00 15.07           C  
ATOM   1152  CG  ARG A1023     -32.479  -9.579  -3.047  1.00 16.40           C  
ATOM   1153  CD  ARG A1023     -30.951  -9.726  -3.129  1.00 16.04           C  
ATOM   1154  NE  ARG A1023     -30.549 -11.129  -3.114  1.00 15.94           N  
ATOM   1155  CZ  ARG A1023     -30.386 -11.852  -2.011  1.00 14.82           C  
ATOM   1156  NH1 ARG A1023     -30.580 -11.306  -0.818  1.00 16.28           N  
ATOM   1157  NH2 ARG A1023     -30.037 -13.125  -2.102  1.00 17.21           N  
ATOM   1158  N   LEU A1024     -34.496 -11.179  -6.962  1.00 15.83           N  
ATOM   1159  CA  LEU A1024     -35.171 -12.143  -7.821  1.00 16.49           C  
ATOM   1160  C   LEU A1024     -34.735 -12.033  -9.271  1.00 19.25           C  
ATOM   1161  O   LEU A1024     -35.281 -12.737 -10.128  1.00 17.51           O  
ATOM   1162  CB  LEU A1024     -36.689 -11.977  -7.724  1.00 17.16           C  
ATOM   1163  CG  LEU A1024     -37.320 -12.260  -6.363  1.00 20.10           C  
ATOM   1164  CD1 LEU A1024     -38.826 -12.032  -6.411  1.00 16.69           C  
ATOM   1165  CD2 LEU A1024     -36.987 -13.674  -5.922  1.00 19.50           C  
ATOM   1166  N   ASN A1025     -33.775 -11.160  -9.569  1.00 17.26           N  
ATOM   1167  CA  ASN A1025     -33.341 -10.946 -10.942  1.00 18.84           C  
ATOM   1168  C   ASN A1025     -31.826 -10.777 -11.011  1.00 16.14           C  
ATOM   1169  O   ASN A1025     -31.090 -11.730 -10.735  1.00 16.05           O  
ATOM   1170  CB  ASN A1025     -34.077  -9.745 -11.538  1.00 18.71           C  
ATOM   1171  CG  ASN A1025     -35.585  -9.961 -11.597  1.00 21.08           C  
ATOM   1172  OD1 ASN A1025     -36.115 -10.443 -12.597  1.00 26.03           O  
ATOM   1173  ND2 ASN A1025     -36.277  -9.624 -10.513  1.00 18.61           N  
ATOM   1174  N   ASN A1026     -31.341  -9.584 -11.356  1.00 19.82           N  
ATOM   1175  CA  ASN A1026     -29.937  -9.404 -11.700  1.00 17.08           C  
ATOM   1176  C   ASN A1026     -29.221  -8.445 -10.758  1.00 14.07           C  
ATOM   1177  O   ASN A1026     -29.829  -7.580 -10.122  1.00 15.28           O  
ATOM   1178  CB  ASN A1026     -29.777  -8.871 -13.132  1.00 20.26           C  
ATOM   1179  CG  ASN A1026     -30.431  -9.760 -14.164  1.00 22.99           C  
ATOM   1180  OD1 ASN A1026     -30.404 -10.984 -14.052  1.00 25.06           O  
ATOM   1181  ND2 ASN A1026     -31.019  -9.146 -15.184  1.00 32.44           N  
ATOM   1182  N   SER A1027     -27.903  -8.617 -10.690  1.00 16.29           N  
ATOM   1183  CA  SER A1027     -26.999  -7.550 -10.287  1.00 13.59           C  
ATOM   1184  C   SER A1027     -26.538  -6.817 -11.536  1.00 17.00           C  
ATOM   1185  O   SER A1027     -26.279  -7.439 -12.567  1.00 16.61           O  
ATOM   1186  CB  SER A1027     -25.788  -8.101  -9.534  1.00 15.79           C  
ATOM   1187  OG  SER A1027     -26.124  -8.461  -8.208  1.00 23.43           O  
ATOM   1188  N   LYS A1028     -26.449  -5.492 -11.446  1.00 15.33           N  
ATOM   1189  CA  LYS A1028     -26.040  -4.669 -12.575  1.00 17.85           C  
ATOM   1190  C   LYS A1028     -24.993  -3.679 -12.096  1.00 16.52           C  
ATOM   1191  O   LYS A1028     -25.103  -3.144 -10.990  1.00 16.82           O  
ATOM   1192  CB  LYS A1028     -27.225  -3.906 -13.188  1.00 19.76           C  
ATOM   1193  CG  LYS A1028     -28.390  -4.771 -13.643  1.00 17.00           C  
ATOM   1194  CD  LYS A1028     -29.480  -3.924 -14.288  1.00 20.74           C  
ATOM   1195  CE  LYS A1028     -30.650  -4.781 -14.738  1.00 28.21           C  
ATOM   1196  NZ  LYS A1028     -31.798  -3.950 -15.192  1.00 28.68           N  
ATOM   1197  N   ILE A1029     -23.979  -3.434 -12.919  1.00 15.90           N  
ATOM   1198  CA  ILE A1029     -22.953  -2.449 -12.601  1.00 12.99           C  
ATOM   1199  C   ILE A1029     -23.012  -1.342 -13.642  1.00 16.66           C  
ATOM   1200  O   ILE A1029     -23.107  -1.611 -14.846  1.00 17.35           O  
ATOM   1201  CB  ILE A1029     -21.545  -3.072 -12.517  1.00 11.83           C  
ATOM   1202  CG1 ILE A1029     -20.524  -2.018 -12.071  1.00 16.87           C  
ATOM   1203  CG2 ILE A1029     -21.126  -3.720 -13.839  1.00 20.01           C  
ATOM   1204  CD1 ILE A1029     -19.200  -2.598 -11.630  1.00 16.79           C  
ATOM   1205  N   TYR A1030     -22.994  -0.102 -13.169  1.00 17.05           N  
ATOM   1206  CA  TYR A1030     -23.029   1.079 -14.015  1.00 16.89           C  
ATOM   1207  C   TYR A1030     -21.737   1.854 -13.820  1.00 14.99           C  
ATOM   1208  O   TYR A1030     -21.248   1.977 -12.694  1.00 16.54           O  
ATOM   1209  CB  TYR A1030     -24.213   1.985 -13.668  1.00 14.33           C  
ATOM   1210  CG  TYR A1030     -25.581   1.374 -13.875  1.00 15.61           C  
ATOM   1211  CD1 TYR A1030     -26.068   0.408 -13.007  1.00 14.28           C  
ATOM   1212  CD2 TYR A1030     -26.400   1.795 -14.914  1.00 16.84           C  
ATOM   1213  CE1 TYR A1030     -27.328  -0.148 -13.183  1.00 18.36           C  
ATOM   1214  CE2 TYR A1030     -27.665   1.248 -15.097  1.00 19.74           C  
ATOM   1215  CZ  TYR A1030     -28.122   0.278 -14.228  1.00 19.49           C  
ATOM   1216  OH  TYR A1030     -29.374  -0.272 -14.400  1.00 24.68           O  
ATOM   1217  N   ILE A1031     -21.196   2.393 -14.908  1.00 14.82           N  
ATOM   1218  CA  ILE A1031     -20.020   3.256 -14.854  1.00 15.74           C  
ATOM   1219  C   ILE A1031     -20.382   4.599 -15.473  1.00 14.85           C  
ATOM   1220  O   ILE A1031     -20.788   4.657 -16.640  1.00 15.76           O  
ATOM   1221  CB  ILE A1031     -18.814   2.623 -15.570  1.00 13.38           C  
ATOM   1222  CG1 ILE A1031     -18.404   1.326 -14.870  1.00 15.31           C  
ATOM   1223  CG2 ILE A1031     -17.647   3.595 -15.615  1.00 17.97           C  
ATOM   1224  CD1 ILE A1031     -17.864   1.529 -13.464  1.00 14.67           C  
ATOM   1225  N   ASN A1032     -20.231   5.673 -14.694  1.00 13.41           N  
ATOM   1226  CA  ASN A1032     -20.626   7.020 -15.118  1.00 15.05           C  
ATOM   1227  C   ASN A1032     -22.060   7.035 -15.642  1.00 18.25           C  
ATOM   1228  O   ASN A1032     -22.375   7.671 -16.651  1.00 15.93           O  
ATOM   1229  CB  ASN A1032     -19.651   7.578 -16.158  1.00 18.25           C  
ATOM   1230  CG  ASN A1032     -18.257   7.779 -15.594  1.00 21.50           C  
ATOM   1231  OD1 ASN A1032     -18.090   7.983 -14.391  1.00 16.80           O  
ATOM   1232  ND2 ASN A1032     -17.248   7.715 -16.457  1.00 21.21           N  
ATOM   1233  N   GLY A1033     -22.940   6.328 -14.935  1.00 17.15           N  
ATOM   1234  CA  GLY A1033     -24.342   6.275 -15.271  1.00 16.93           C  
ATOM   1235  C   GLY A1033     -24.702   5.314 -16.378  1.00 22.57           C  
ATOM   1236  O   GLY A1033     -25.888   5.191 -16.708  1.00 23.90           O  
ATOM   1237  N   ARG A1034     -23.737   4.618 -16.957  1.00 17.86           N  
ATOM   1238  CA  ARG A1034     -24.023   3.726 -18.065  1.00 22.68           C  
ATOM   1239  C   ARG A1034     -23.952   2.262 -17.659  1.00 18.51           C  
ATOM   1240  O   ARG A1034     -22.969   1.822 -17.053  1.00 18.51           O  
ATOM   1241  CB  ARG A1034     -23.069   3.956 -19.221  1.00 25.26           C  
ATOM   1242  CG  ARG A1034     -23.424   3.050 -20.336  1.00 36.10           C  
ATOM   1243  CD  ARG A1034     -22.317   2.105 -20.615  1.00 37.04           C  
ATOM   1244  NE  ARG A1034     -21.365   2.913 -21.314  1.00 46.08           N  
ATOM   1245  CZ  ARG A1034     -21.565   3.434 -22.515  1.00 49.80           C  
ATOM   1246  NH1 ARG A1034     -22.654   3.136 -23.221  1.00 49.89           N  
ATOM   1247  NH2 ARG A1034     -20.633   4.235 -23.020  1.00 55.21           N  
ATOM   1248  N   LEU A1035     -24.963   1.501 -18.073  1.00 20.22           N  
ATOM   1249  CA  LEU A1035     -24.989   0.069 -17.822  1.00 21.52           C  
ATOM   1250  C   LEU A1035     -23.853  -0.635 -18.555  1.00 25.04           C  
ATOM   1251  O   LEU A1035     -23.721  -0.529 -19.778  1.00 25.12           O  
ATOM   1252  CB  LEU A1035     -26.334  -0.505 -18.256  1.00 22.87           C  
ATOM   1253  CG  LEU A1035     -26.480  -2.014 -18.088  1.00 23.26           C  
ATOM   1254  CD1 LEU A1035     -26.395  -2.401 -16.619  1.00 21.60           C  
ATOM   1255  CD2 LEU A1035     -27.784  -2.487 -18.700  1.00 23.75           C  
ATOM   1256  N   ILE A1036     -23.046  -1.372 -17.798  1.00 19.44           N  
ATOM   1257  CA  ILE A1036     -21.882  -2.079 -18.320  1.00 21.96           C  
ATOM   1258  C   ILE A1036     -22.133  -3.579 -18.411  1.00 26.27           C  
ATOM   1259  O   ILE A1036     -21.858  -4.202 -19.437  1.00 25.85           O  
ATOM   1260  CB  ILE A1036     -20.627  -1.783 -17.468  1.00 22.13           C  
ATOM   1261  CG1 ILE A1036     -20.269  -0.301 -17.545  1.00 20.81           C  
ATOM   1262  CG2 ILE A1036     -19.452  -2.621 -17.940  1.00 24.07           C  
ATOM   1263  CD1 ILE A1036     -19.971   0.173 -18.949  1.00 24.73           C  
ATOM   1264  N   ASP A1037     -22.646  -4.180 -17.340  1.00 26.42           N  
ATOM   1265  CA  ASP A1037     -22.851  -5.620 -17.324  1.00 24.76           C  
ATOM   1266  C   ASP A1037     -23.900  -5.967 -16.279  1.00 24.60           C  
ATOM   1267  O   ASP A1037     -24.222  -5.163 -15.399  1.00 19.93           O  
ATOM   1268  CB  ASP A1037     -21.543  -6.363 -17.039  1.00 27.14           C  
ATOM   1269  CG  ASP A1037     -21.631  -7.838 -17.359  1.00 34.04           C  
ATOM   1270  OD1 ASP A1037     -22.346  -8.197 -18.321  1.00 35.29           O  
ATOM   1271  OD2 ASP A1037     -20.988  -8.639 -16.652  1.00 37.40           O  
ATOM   1272  N   GLN A1038     -24.427  -7.183 -16.392  1.00 24.23           N  
ATOM   1273  CA  GLN A1038     -25.400  -7.683 -15.437  1.00 21.87           C  
ATOM   1274  C   GLN A1038     -25.351  -9.202 -15.429  1.00 22.06           C  
ATOM   1275  O   GLN A1038     -25.039  -9.831 -16.443  1.00 23.41           O  
ATOM   1276  CB  GLN A1038     -26.813  -7.187 -15.762  1.00 21.98           C  
ATOM   1277  CG  GLN A1038     -27.359  -7.665 -17.095  1.00 24.69           C  
ATOM   1278  CD  GLN A1038     -28.757  -7.145 -17.367  1.00 29.99           C  
ATOM   1279  OE1 GLN A1038     -29.749  -7.763 -16.982  1.00 39.35           O  
ATOM   1280  NE2 GLN A1038     -28.841  -5.999 -18.033  1.00 28.89           N  
ATOM   1281  N   LYS A1039     -25.650  -9.782 -14.270  1.00 19.84           N  
ATOM   1282  CA  LYS A1039     -25.626 -11.222 -14.067  1.00 19.26           C  
ATOM   1283  C   LYS A1039     -26.790 -11.633 -13.176  1.00 19.47           C  
ATOM   1284  O   LYS A1039     -27.155 -10.894 -12.251  1.00 16.59           O  
ATOM   1285  CB  LYS A1039     -24.304 -11.682 -13.429  1.00 21.72           C  
ATOM   1286  CG  LYS A1039     -23.086 -11.533 -14.329  1.00 24.50           C  
ATOM   1287  CD  LYS A1039     -23.003 -12.680 -15.324  1.00 27.01           C  
ATOM   1288  CE  LYS A1039     -21.836 -12.505 -16.282  1.00 32.08           C  
ATOM   1289  NZ  LYS A1039     -22.017 -11.329 -17.175  1.00 37.23           N  
ATOM   1290  N   PRO A1040     -27.384 -12.797 -13.427  1.00 19.18           N  
ATOM   1291  CA  PRO A1040     -28.471 -13.272 -12.560  1.00 19.59           C  
ATOM   1292  C   PRO A1040     -27.949 -13.606 -11.171  1.00 15.88           C  
ATOM   1293  O   PRO A1040     -26.844 -14.134 -11.017  1.00 18.58           O  
ATOM   1294  CB  PRO A1040     -28.987 -14.527 -13.280  1.00 24.79           C  
ATOM   1295  CG  PRO A1040     -28.373 -14.485 -14.662  1.00 26.85           C  
ATOM   1296  CD  PRO A1040     -27.089 -13.742 -14.518  1.00 28.29           C  
ATOM   1297  N   ILE A1041     -28.748 -13.291 -10.150  1.00 15.98           N  
ATOM   1298  CA  ILE A1041     -28.327 -13.571  -8.779  1.00 18.33           C  
ATOM   1299  C   ILE A1041     -29.415 -14.289  -7.988  1.00 18.17           C  
ATOM   1300  O   ILE A1041     -29.292 -14.447  -6.769  1.00 17.37           O  
ATOM   1301  CB  ILE A1041     -27.910 -12.288  -8.033  1.00 17.07           C  
ATOM   1302  CG1 ILE A1041     -29.094 -11.328  -7.893  1.00 18.14           C  
ATOM   1303  CG2 ILE A1041     -26.735 -11.612  -8.723  1.00 16.25           C  
ATOM   1304  CD1 ILE A1041     -28.857 -10.221  -6.882  1.00 19.55           C  
ATOM   1305  N   SER A1042     -30.485 -14.731  -8.656  1.00 17.95           N  
ATOM   1306  CA  SER A1042     -31.586 -15.344  -7.914  1.00 19.78           C  
ATOM   1307  C   SER A1042     -31.211 -16.689  -7.302  1.00 21.93           C  
ATOM   1308  O   SER A1042     -31.912 -17.154  -6.398  1.00 23.02           O  
ATOM   1309  CB  SER A1042     -32.822 -15.510  -8.803  1.00 22.00           C  
ATOM   1310  OG  SER A1042     -32.626 -16.492  -9.804  1.00 25.69           O  
ATOM   1311  N   ASN A1043     -30.130 -17.324  -7.765  1.00 19.25           N  
ATOM   1312  CA  ASN A1043     -29.660 -18.552  -7.136  1.00 22.72           C  
ATOM   1313  C   ASN A1043     -29.026 -18.308  -5.773  1.00 25.59           C  
ATOM   1314  O   ASN A1043     -28.770 -19.275  -5.047  1.00 24.78           O  
ATOM   1315  CB  ASN A1043     -28.664 -19.271  -8.050  1.00 22.35           C  
ATOM   1316  CG  ASN A1043     -27.500 -18.390  -8.452  1.00 26.73           C  
ATOM   1317  OD1 ASN A1043     -27.682 -17.222  -8.792  1.00 26.71           O  
ATOM   1318  ND2 ASN A1043     -26.292 -18.942  -8.402  1.00 26.82           N  
ATOM   1319  N   LEU A1044     -28.766 -17.055  -5.409  1.00 20.88           N  
ATOM   1320  CA  LEU A1044     -28.242 -16.749  -4.088  1.00 17.40           C  
ATOM   1321  C   LEU A1044     -29.377 -16.715  -3.072  1.00 20.72           C  
ATOM   1322  O   LEU A1044     -30.462 -16.193  -3.346  1.00 22.40           O  
ATOM   1323  CB  LEU A1044     -27.496 -15.411  -4.100  1.00 16.51           C  
ATOM   1324  CG  LEU A1044     -26.025 -15.440  -4.534  1.00 18.08           C  
ATOM   1325  CD1 LEU A1044     -25.876 -15.740  -6.022  1.00 21.57           C  
ATOM   1326  CD2 LEU A1044     -25.336 -14.122  -4.171  1.00 19.65           C  
ATOM   1327  N   GLY A1045     -29.125 -17.290  -1.898  1.00 22.39           N  
ATOM   1328  CA  GLY A1045     -30.126 -17.347  -0.851  1.00 21.54           C  
ATOM   1329  C   GLY A1045     -30.035 -16.183   0.112  1.00 20.69           C  
ATOM   1330  O   GLY A1045     -30.101 -15.021  -0.300  1.00 18.35           O  
ATOM   1331  N   ASN A1046     -29.889 -16.479   1.400  1.00 17.15           N  
ATOM   1332  CA  ASN A1046     -29.757 -15.428   2.397  1.00 18.78           C  
ATOM   1333  C   ASN A1046     -28.363 -14.826   2.319  1.00 18.76           C  
ATOM   1334  O   ASN A1046     -27.363 -15.548   2.357  1.00 18.27           O  
ATOM   1335  CB  ASN A1046     -30.011 -15.971   3.802  1.00 21.17           C  
ATOM   1336  CG  ASN A1046     -30.255 -14.867   4.812  1.00 21.82           C  
ATOM   1337  OD1 ASN A1046     -31.092 -13.993   4.594  1.00 22.80           O  
ATOM   1338  ND2 ASN A1046     -29.509 -14.886   5.911  1.00 22.39           N  
ATOM   1339  N   ILE A1047     -28.300 -13.505   2.192  1.00 17.18           N  
ATOM   1340  CA  ILE A1047     -27.051 -12.765   2.303  1.00 16.84           C  
ATOM   1341  C   ILE A1047     -27.065 -12.073   3.655  1.00 19.51           C  
ATOM   1342  O   ILE A1047     -27.927 -11.226   3.912  1.00 20.50           O  
ATOM   1343  CB  ILE A1047     -26.877 -11.742   1.172  1.00 17.68           C  
ATOM   1344  CG1 ILE A1047     -26.834 -12.439  -0.184  1.00 17.36           C  
ATOM   1345  CG2 ILE A1047     -25.610 -10.933   1.389  1.00 17.80           C  
ATOM   1346  CD1 ILE A1047     -26.945 -11.481  -1.348  1.00 17.36           C  
ATOM   1347  N   HIS A1048     -26.130 -12.443   4.524  1.00 15.36           N  
ATOM   1348  CA  HIS A1048     -25.984 -11.809   5.832  1.00 17.02           C  
ATOM   1349  C   HIS A1048     -24.645 -11.083   5.814  1.00 20.03           C  
ATOM   1350  O   HIS A1048     -23.598 -11.681   6.072  1.00 17.09           O  
ATOM   1351  CB  HIS A1048     -26.062 -12.818   6.971  1.00 22.91           C  
ATOM   1352  CG  HIS A1048     -26.069 -12.190   8.330  1.00 23.75           C  
ATOM   1353  ND1 HIS A1048     -26.228 -12.920   9.488  1.00 32.09           N  
ATOM   1354  CD2 HIS A1048     -25.946 -10.898   8.715  1.00 31.32           C  
ATOM   1355  CE1 HIS A1048     -26.198 -12.105  10.527  1.00 34.07           C  
ATOM   1356  NE2 HIS A1048     -26.027 -10.872  10.086  1.00 30.16           N  
ATOM   1357  N   ALA A1049     -24.692  -9.789   5.519  1.00 16.27           N  
ATOM   1358  CA  ALA A1049     -23.494  -8.977   5.395  1.00 17.15           C  
ATOM   1359  C   ALA A1049     -22.944  -8.618   6.772  1.00 17.30           C  
ATOM   1360  O   ALA A1049     -23.497  -8.985   7.812  1.00 20.07           O  
ATOM   1361  CB  ALA A1049     -23.789  -7.725   4.572  1.00 16.90           C  
ATOM   1362  N   SER A1050     -21.839  -7.881   6.777  1.00 19.12           N  
ATOM   1363  CA  SER A1050     -21.162  -7.535   8.015  1.00 17.16           C  
ATOM   1364  C   SER A1050     -21.883  -6.398   8.735  1.00 18.89           C  
ATOM   1365  O   SER A1050     -22.603  -5.596   8.133  1.00 18.58           O  
ATOM   1366  CB  SER A1050     -19.708  -7.141   7.734  1.00 16.85           C  
ATOM   1367  OG  SER A1050     -19.052  -6.701   8.911  1.00 19.24           O  
ATOM   1368  N   ASN A1051     -21.684  -6.344  10.054  1.00 17.11           N  
ATOM   1369  CA  ASN A1051     -22.123  -5.192  10.832  1.00 19.52           C  
ATOM   1370  C   ASN A1051     -21.266  -3.963  10.574  1.00 20.25           C  
ATOM   1371  O   ASN A1051     -21.650  -2.865  10.991  1.00 21.06           O  
ATOM   1372  CB  ASN A1051     -22.103  -5.521  12.325  1.00 20.84           C  
ATOM   1373  CG  ASN A1051     -23.128  -6.568  12.704  1.00 24.67           C  
ATOM   1374  OD1 ASN A1051     -24.206  -6.637  12.116  1.00 27.17           O  
ATOM   1375  ND2 ASN A1051     -22.794  -7.395  13.688  1.00 27.00           N  
ATOM   1376  N   ASN A1052     -20.128  -4.120   9.904  1.00 17.79           N  
ATOM   1377  CA  ASN A1052     -19.233  -3.020   9.589  1.00 20.06           C  
ATOM   1378  C   ASN A1052     -18.946  -2.981   8.095  1.00 18.81           C  
ATOM   1379  O   ASN A1052     -19.157  -3.956   7.368  1.00 19.06           O  
ATOM   1380  CB  ASN A1052     -17.905  -3.138  10.347  1.00 20.73           C  
ATOM   1381  CG  ASN A1052     -18.096  -3.342  11.831  1.00 22.09           C  
ATOM   1382  OD1 ASN A1052     -19.031  -2.812  12.426  1.00 26.59           O  
ATOM   1383  ND2 ASN A1052     -17.210  -4.124  12.439  1.00 32.36           N  
ATOM   1384  N   ILE A1053     -18.462  -1.829   7.644  1.00 16.22           N  
ATOM   1385  CA  ILE A1053     -17.857  -1.684   6.328  1.00 12.36           C  
ATOM   1386  C   ILE A1053     -16.418  -1.251   6.545  1.00 16.92           C  
ATOM   1387  O   ILE A1053     -16.163  -0.259   7.238  1.00 15.65           O  
ATOM   1388  CB  ILE A1053     -18.605  -0.666   5.448  1.00 13.48           C  
ATOM   1389  CG1 ILE A1053     -20.069  -1.070   5.267  1.00 14.41           C  
ATOM   1390  CG2 ILE A1053     -17.940  -0.568   4.088  1.00 13.94           C  
ATOM   1391  CD1 ILE A1053     -20.892  -0.057   4.489  1.00 11.86           C  
ATOM   1392  N   MET A1054     -15.480  -1.995   5.975  1.00 15.76           N  
ATOM   1393  CA  MET A1054     -14.065  -1.676   6.101  1.00 17.21           C  
ATOM   1394  C   MET A1054     -13.558  -1.145   4.767  1.00 13.11           C  
ATOM   1395  O   MET A1054     -13.537  -1.876   3.769  1.00 14.06           O  
ATOM   1396  CB  MET A1054     -13.260  -2.900   6.544  1.00 20.74           C  
ATOM   1397  CG  MET A1054     -11.769  -2.643   6.681  1.00 20.84           C  
ATOM   1398  SD  MET A1054     -11.360  -1.446   7.974  1.00 26.90           S  
ATOM   1399  CE  MET A1054     -11.454  -2.475   9.441  1.00 30.13           C  
ATOM   1400  N   PHE A1055     -13.168   0.126   4.748  1.00 14.40           N  
ATOM   1401  CA  PHE A1055     -12.506   0.733   3.599  1.00 14.43           C  
ATOM   1402  C   PHE A1055     -11.006   0.586   3.814  1.00 14.54           C  
ATOM   1403  O   PHE A1055     -10.440   1.219   4.710  1.00 16.86           O  
ATOM   1404  CB  PHE A1055     -12.902   2.200   3.445  1.00  7.76           C  
ATOM   1405  CG  PHE A1055     -14.372   2.408   3.221  1.00 13.88           C  
ATOM   1406  CD1 PHE A1055     -15.260   2.406   4.287  1.00 15.17           C  
ATOM   1407  CD2 PHE A1055     -14.867   2.611   1.945  1.00 14.15           C  
ATOM   1408  CE1 PHE A1055     -16.614   2.601   4.082  1.00 11.39           C  
ATOM   1409  CE2 PHE A1055     -16.222   2.805   1.732  1.00 15.64           C  
ATOM   1410  CZ  PHE A1055     -17.095   2.800   2.802  1.00 15.06           C  
ATOM   1411  N   LYS A1056     -10.368  -0.245   2.992  1.00 16.32           N  
ATOM   1412  CA  LYS A1056      -9.000  -0.673   3.250  1.00 18.48           C  
ATOM   1413  C   LYS A1056      -8.486  -1.528   2.102  1.00 15.68           C  
ATOM   1414  O   LYS A1056      -9.208  -2.397   1.604  1.00 16.84           O  
ATOM   1415  CB  LYS A1056      -8.939  -1.458   4.565  1.00 17.11           C  
ATOM   1416  CG  LYS A1056      -7.564  -1.959   4.962  1.00 21.99           C  
ATOM   1417  CD  LYS A1056      -7.699  -2.981   6.086  1.00 23.72           C  
ATOM   1418  CE  LYS A1056      -6.393  -3.698   6.374  1.00 31.64           C  
ATOM   1419  NZ  LYS A1056      -5.345  -2.736   6.786  1.00 35.50           N  
ATOM   1420  N   LEU A1057      -7.250  -1.295   1.666  1.00 16.17           N  
ATOM   1421  CA  LEU A1057      -6.640  -2.160   0.663  1.00 14.22           C  
ATOM   1422  C   LEU A1057      -6.212  -3.454   1.341  1.00 19.15           C  
ATOM   1423  O   LEU A1057      -5.413  -3.432   2.284  1.00 20.49           O  
ATOM   1424  CB  LEU A1057      -5.453  -1.473  -0.009  1.00 16.48           C  
ATOM   1425  CG  LEU A1057      -5.768  -0.581  -1.214  1.00 15.08           C  
ATOM   1426  CD1 LEU A1057      -6.606   0.632  -0.810  1.00 12.63           C  
ATOM   1427  CD2 LEU A1057      -4.487  -0.159  -1.937  1.00 21.66           C  
ATOM   1428  N   ASP A1058      -6.754  -4.576   0.874  1.00 17.91           N  
ATOM   1429  CA  ASP A1058      -6.541  -5.876   1.500  1.00 20.40           C  
ATOM   1430  C   ASP A1058      -6.115  -6.873   0.436  1.00 17.89           C  
ATOM   1431  O   ASP A1058      -6.867  -7.133  -0.508  1.00 19.69           O  
ATOM   1432  CB  ASP A1058      -7.814  -6.352   2.208  1.00 23.40           C  
ATOM   1433  CG  ASP A1058      -7.666  -6.376   3.716  1.00 36.56           C  
ATOM   1434  OD1 ASP A1058      -8.619  -6.791   4.409  1.00 40.04           O  
ATOM   1435  OD2 ASP A1058      -6.588  -5.987   4.212  1.00 38.07           O  
ATOM   1436  N   GLY A1059      -4.918  -7.433   0.591  1.00 17.32           N  
ATOM   1437  CA  GLY A1059      -4.399  -8.395  -0.357  1.00 17.14           C  
ATOM   1438  C   GLY A1059      -3.664  -7.809  -1.541  1.00 18.32           C  
ATOM   1439  O   GLY A1059      -3.365  -8.548  -2.488  1.00 14.64           O  
ATOM   1440  N   CYS A1060      -3.364  -6.512  -1.521  1.00 17.13           N  
ATOM   1441  CA  CYS A1060      -2.670  -5.862  -2.627  1.00 20.23           C  
ATOM   1442  C   CYS A1060      -1.166  -6.029  -2.456  1.00 17.88           C  
ATOM   1443  O   CYS A1060      -0.610  -5.674  -1.411  1.00 16.39           O  
ATOM   1444  CB  CYS A1060      -3.036  -4.381  -2.694  1.00 20.35           C  
ATOM   1445  SG  CYS A1060      -2.300  -3.510  -4.096  1.00 19.81           S  
ATOM   1446  N   ARG A1061      -0.507  -6.551  -3.487  1.00 19.70           N  
ATOM   1447  CA  ARG A1061       0.920  -6.825  -3.407  1.00 23.91           C  
ATOM   1448  C   ARG A1061       1.789  -5.659  -3.864  1.00 20.13           C  
ATOM   1449  O   ARG A1061       3.000  -5.680  -3.624  1.00 22.85           O  
ATOM   1450  CB  ARG A1061       1.256  -8.082  -4.218  1.00 26.64           C  
ATOM   1451  CG  ARG A1061       0.383  -9.275  -3.848  1.00 23.61           C  
ATOM   1452  CD  ARG A1061       0.973 -10.599  -4.304  1.00 35.87           C  
ATOM   1453  NE  ARG A1061       2.294 -10.825  -3.726  1.00 38.82           N  
ATOM   1454  CZ  ARG A1061       3.431 -10.717  -4.403  1.00 36.53           C  
ATOM   1455  NH1 ARG A1061       3.407 -10.408  -5.691  1.00 38.40           N  
ATOM   1456  NH2 ARG A1061       4.590 -10.933  -3.797  1.00 36.00           N  
ATOM   1457  N   ASP A1062       1.210  -4.643  -4.501  1.00 19.83           N  
ATOM   1458  CA  ASP A1062       1.952  -3.459  -4.931  1.00 17.01           C  
ATOM   1459  C   ASP A1062       2.019  -2.485  -3.757  1.00 20.20           C  
ATOM   1460  O   ASP A1062       1.009  -1.877  -3.389  1.00 16.63           O  
ATOM   1461  CB  ASP A1062       1.285  -2.825  -6.152  1.00 20.88           C  
ATOM   1462  CG  ASP A1062       1.855  -1.453  -6.503  1.00 22.47           C  
ATOM   1463  OD1 ASP A1062       2.979  -1.124  -6.070  1.00 23.43           O  
ATOM   1464  OD2 ASP A1062       1.170  -0.695  -7.227  1.00 21.54           O  
ATOM   1465  N   THR A1063       3.215  -2.325  -3.179  1.00 19.26           N  
ATOM   1466  CA  THR A1063       3.361  -1.529  -1.962  1.00 19.78           C  
ATOM   1467  C   THR A1063       3.026  -0.058  -2.182  1.00 20.05           C  
ATOM   1468  O   THR A1063       2.691   0.647  -1.222  1.00 20.56           O  
ATOM   1469  CB  THR A1063       4.783  -1.654  -1.413  1.00 23.75           C  
ATOM   1470  OG1 THR A1063       5.697  -0.979  -2.287  1.00 28.00           O  
ATOM   1471  CG2 THR A1063       5.182  -3.117  -1.288  1.00 25.54           C  
ATOM   1472  N   HIS A1064       3.123   0.430  -3.416  1.00 18.59           N  
ATOM   1473  CA  HIS A1064       2.854   1.833  -3.709  1.00 19.45           C  
ATOM   1474  C   HIS A1064       1.402   2.095  -4.096  1.00 18.57           C  
ATOM   1475  O   HIS A1064       1.048   3.248  -4.367  1.00 21.58           O  
ATOM   1476  CB  HIS A1064       3.782   2.326  -4.825  1.00 25.23           C  
ATOM   1477  CG  HIS A1064       5.231   2.045  -4.573  1.00 29.07           C  
ATOM   1478  ND1 HIS A1064       5.890   2.481  -3.443  1.00 31.24           N  
ATOM   1479  CD2 HIS A1064       6.147   1.369  -5.305  1.00 35.35           C  
ATOM   1480  CE1 HIS A1064       7.149   2.085  -3.491  1.00 34.56           C  
ATOM   1481  NE2 HIS A1064       7.332   1.408  -4.610  1.00 31.63           N  
ATOM   1482  N   ARG A1065       0.561   1.062  -4.117  1.00 18.61           N  
ATOM   1483  CA  ARG A1065      -0.824   1.206  -4.549  1.00 15.84           C  
ATOM   1484  C   ARG A1065      -1.611   2.100  -3.597  1.00 16.08           C  
ATOM   1485  O   ARG A1065      -1.374   2.125  -2.386  1.00 16.60           O  
ATOM   1486  CB  ARG A1065      -1.499  -0.163  -4.630  1.00 17.60           C  
ATOM   1487  CG  ARG A1065      -2.747  -0.238  -5.508  1.00 17.65           C  
ATOM   1488  CD  ARG A1065      -2.404  -0.622  -6.943  1.00 18.02           C  
ATOM   1489  NE  ARG A1065      -1.487   0.332  -7.556  1.00 22.47           N  
ATOM   1490  CZ  ARG A1065      -1.878   1.350  -8.317  1.00 28.17           C  
ATOM   1491  NH1 ARG A1065      -3.177   1.532  -8.564  1.00 22.22           N  
ATOM   1492  NH2 ARG A1065      -0.978   2.191  -8.831  1.00 33.06           N  
ATOM   1493  N   TYR A1066      -2.555   2.847  -4.164  1.00 14.33           N  
ATOM   1494  CA  TYR A1066      -3.502   3.624  -3.374  1.00 13.34           C  
ATOM   1495  C   TYR A1066      -4.755   3.817  -4.212  1.00 13.92           C  
ATOM   1496  O   TYR A1066      -4.776   3.519  -5.407  1.00 12.61           O  
ATOM   1497  CB  TYR A1066      -2.920   4.975  -2.935  1.00 14.91           C  
ATOM   1498  CG  TYR A1066      -2.544   5.915  -4.066  1.00 16.54           C  
ATOM   1499  CD1 TYR A1066      -3.500   6.717  -4.684  1.00 13.73           C  
ATOM   1500  CD2 TYR A1066      -1.234   6.003  -4.511  1.00 16.09           C  
ATOM   1501  CE1 TYR A1066      -3.156   7.578  -5.714  1.00 18.94           C  
ATOM   1502  CE2 TYR A1066      -0.882   6.861  -5.541  1.00 16.62           C  
ATOM   1503  CZ  TYR A1066      -1.847   7.646  -6.137  1.00 18.40           C  
ATOM   1504  OH  TYR A1066      -1.507   8.502  -7.163  1.00 22.33           O  
ATOM   1505  N   ILE A1067      -5.810   4.318  -3.571  1.00 12.06           N  
ATOM   1506  CA  ILE A1067      -7.015   4.720  -4.284  1.00 12.10           C  
ATOM   1507  C   ILE A1067      -7.523   6.014  -3.675  1.00 14.42           C  
ATOM   1508  O   ILE A1067      -7.221   6.353  -2.529  1.00 11.89           O  
ATOM   1509  CB  ILE A1067      -8.151   3.664  -4.256  1.00 12.22           C  
ATOM   1510  CG1 ILE A1067      -8.619   3.404  -2.824  1.00 10.94           C  
ATOM   1511  CG2 ILE A1067      -7.721   2.361  -4.915  1.00 14.41           C  
ATOM   1512  CD1 ILE A1067      -9.835   2.491  -2.728  1.00 15.80           C  
ATOM   1513  N   TRP A1068      -8.291   6.746  -4.476  1.00 11.08           N  
ATOM   1514  CA  TRP A1068      -9.126   7.843  -4.012  1.00 12.79           C  
ATOM   1515  C   TRP A1068     -10.584   7.413  -4.097  1.00 11.93           C  
ATOM   1516  O   TRP A1068     -10.989   6.768  -5.068  1.00 12.90           O  
ATOM   1517  CB  TRP A1068      -8.922   9.109  -4.854  1.00 14.13           C  
ATOM   1518  CG  TRP A1068      -7.636   9.869  -4.617  1.00 14.14           C  
ATOM   1519  CD1 TRP A1068      -6.489   9.787  -5.355  1.00 17.34           C  
ATOM   1520  CD2 TRP A1068      -7.391  10.857  -3.606  1.00 15.40           C  
ATOM   1521  NE1 TRP A1068      -5.542  10.645  -4.855  1.00 19.14           N  
ATOM   1522  CE2 TRP A1068      -6.069  11.315  -3.780  1.00 17.56           C  
ATOM   1523  CE3 TRP A1068      -8.155  11.392  -2.562  1.00 13.71           C  
ATOM   1524  CZ2 TRP A1068      -5.492  12.281  -2.951  1.00 19.49           C  
ATOM   1525  CZ3 TRP A1068      -7.581  12.353  -1.740  1.00 17.67           C  
ATOM   1526  CH2 TRP A1068      -6.266  12.785  -1.941  1.00 14.86           C  
ATOM   1527  N   ILE A1069     -11.373   7.774  -3.089  1.00 12.30           N  
ATOM   1528  CA  ILE A1069     -12.794   7.452  -3.059  1.00 12.23           C  
ATOM   1529  C   ILE A1069     -13.561   8.660  -2.535  1.00 11.75           C  
ATOM   1530  O   ILE A1069     -13.021   9.480  -1.783  1.00 13.78           O  
ATOM   1531  CB  ILE A1069     -13.061   6.196  -2.194  1.00 14.15           C  
ATOM   1532  CG1 ILE A1069     -14.513   5.728  -2.315  1.00 19.08           C  
ATOM   1533  CG2 ILE A1069     -12.699   6.463  -0.745  1.00 14.92           C  
ATOM   1534  CD1 ILE A1069     -14.761   4.360  -1.715  1.00 21.64           C  
ATOM   1535  N   LYS A1070     -14.822   8.790  -2.952  1.00 12.34           N  
ATOM   1536  CA  LYS A1070     -15.695   9.814  -2.391  1.00 13.18           C  
ATOM   1537  C   LYS A1070     -17.155   9.425  -2.596  1.00 13.57           C  
ATOM   1538  O   LYS A1070     -17.494   8.690  -3.529  1.00 12.34           O  
ATOM   1539  CB  LYS A1070     -15.410  11.198  -2.999  1.00 17.58           C  
ATOM   1540  CG  LYS A1070     -15.585  11.287  -4.501  1.00 14.09           C  
ATOM   1541  CD  LYS A1070     -15.464  12.724  -5.003  1.00 20.54           C  
ATOM   1542  CE  LYS A1070     -15.292  12.762  -6.517  1.00 23.28           C  
ATOM   1543  NZ  LYS A1070     -14.983  14.123  -7.039  1.00 23.68           N  
ATOM   1544  N   TYR A1071     -18.007   9.910  -1.685  1.00 14.27           N  
ATOM   1545  CA  TYR A1071     -19.465   9.782  -1.776  1.00 17.14           C  
ATOM   1546  C   TYR A1071     -19.915   8.324  -1.845  1.00 13.80           C  
ATOM   1547  O   TYR A1071     -20.663   7.926  -2.741  1.00 12.97           O  
ATOM   1548  CB  TYR A1071     -20.018  10.566  -2.969  1.00 15.67           C  
ATOM   1549  CG  TYR A1071     -19.905  12.065  -2.829  1.00 19.19           C  
ATOM   1550  CD1 TYR A1071     -19.832  12.881  -3.950  1.00 21.86           C  
ATOM   1551  CD2 TYR A1071     -19.875  12.665  -1.577  1.00 18.94           C  
ATOM   1552  CE1 TYR A1071     -19.725  14.254  -3.827  1.00 29.39           C  
ATOM   1553  CE2 TYR A1071     -19.769  14.037  -1.447  1.00 27.12           C  
ATOM   1554  CZ  TYR A1071     -19.696  14.826  -2.575  1.00 32.62           C  
ATOM   1555  OH  TYR A1071     -19.592  16.195  -2.450  1.00 42.40           O  
ATOM   1556  N   PHE A1072     -19.476   7.525  -0.877  1.00 12.77           N  
ATOM   1557  CA  PHE A1072     -20.011   6.176  -0.766  1.00 13.85           C  
ATOM   1558  C   PHE A1072     -21.433   6.237  -0.228  1.00 15.16           C  
ATOM   1559  O   PHE A1072     -21.703   6.931   0.756  1.00 14.40           O  
ATOM   1560  CB  PHE A1072     -19.152   5.305   0.146  1.00 14.06           C  
ATOM   1561  CG  PHE A1072     -19.724   3.931   0.355  1.00 13.81           C  
ATOM   1562  CD1 PHE A1072     -19.456   2.916  -0.548  1.00 14.52           C  
ATOM   1563  CD2 PHE A1072     -20.562   3.663   1.429  1.00 17.01           C  
ATOM   1564  CE1 PHE A1072     -19.997   1.654  -0.374  1.00 17.46           C  
ATOM   1565  CE2 PHE A1072     -21.107   2.402   1.605  1.00 17.33           C  
ATOM   1566  CZ  PHE A1072     -20.821   1.398   0.703  1.00 14.86           C  
ATOM   1567  N   ASN A1073     -22.342   5.501  -0.864  1.00 12.36           N  
ATOM   1568  CA  ASN A1073     -23.734   5.489  -0.442  1.00 13.23           C  
ATOM   1569  C   ASN A1073     -24.316   4.091  -0.573  1.00 15.57           C  
ATOM   1570  O   ASN A1073     -23.850   3.269  -1.366  1.00 15.74           O  
ATOM   1571  CB  ASN A1073     -24.581   6.475  -1.253  1.00 13.61           C  
ATOM   1572  CG  ASN A1073     -24.334   7.910  -0.850  1.00 16.22           C  
ATOM   1573  OD1 ASN A1073     -24.663   8.316   0.264  1.00 15.85           O  
ATOM   1574  ND2 ASN A1073     -23.762   8.690  -1.757  1.00 16.39           N  
ATOM   1575  N   LEU A1074     -25.356   3.842   0.223  1.00 14.17           N  
ATOM   1576  CA  LEU A1074     -26.121   2.604   0.204  1.00 15.25           C  
ATOM   1577  C   LEU A1074     -27.599   2.937   0.084  1.00 16.35           C  
ATOM   1578  O   LEU A1074     -28.063   3.944   0.626  1.00 18.33           O  
ATOM   1579  CB  LEU A1074     -25.870   1.772   1.467  1.00 17.68           C  
ATOM   1580  CG  LEU A1074     -24.529   1.045   1.490  1.00 16.70           C  
ATOM   1581  CD1 LEU A1074     -24.291   0.390   2.839  1.00 21.27           C  
ATOM   1582  CD2 LEU A1074     -24.507   0.006   0.379  1.00 19.96           C  
ATOM   1583  N   PHE A1075     -28.335   2.089  -0.630  1.00 14.32           N  
ATOM   1584  CA  PHE A1075     -29.753   2.301  -0.883  1.00 17.12           C  
ATOM   1585  C   PHE A1075     -30.479   0.984  -0.665  1.00 19.46           C  
ATOM   1586  O   PHE A1075     -29.947  -0.079  -0.995  1.00 17.59           O  
ATOM   1587  CB  PHE A1075     -30.003   2.806  -2.315  1.00 16.40           C  
ATOM   1588  CG  PHE A1075     -29.139   3.976  -2.710  1.00 19.39           C  
ATOM   1589  CD1 PHE A1075     -27.877   3.772  -3.248  1.00 17.17           C  
ATOM   1590  CD2 PHE A1075     -29.588   5.277  -2.541  1.00 19.26           C  
ATOM   1591  CE1 PHE A1075     -27.075   4.844  -3.608  1.00 17.77           C  
ATOM   1592  CE2 PHE A1075     -28.790   6.353  -2.900  1.00 17.46           C  
ATOM   1593  CZ  PHE A1075     -27.533   6.135  -3.433  1.00 17.25           C  
ATOM   1594  N   ASP A1076     -31.689   1.051  -0.101  1.00 20.73           N  
ATOM   1595  CA  ASP A1076     -32.486  -0.146   0.153  1.00 22.24           C  
ATOM   1596  C   ASP A1076     -33.456  -0.465  -0.981  1.00 24.02           C  
ATOM   1597  O   ASP A1076     -34.533  -1.025  -0.733  1.00 25.57           O  
ATOM   1598  CB  ASP A1076     -33.232  -0.020   1.485  1.00 30.52           C  
ATOM   1599  CG  ASP A1076     -34.088   1.234   1.576  1.00 38.39           C  
ATOM   1600  OD1 ASP A1076     -34.286   1.726   2.708  1.00 50.10           O  
ATOM   1601  OD2 ASP A1076     -34.572   1.729   0.536  1.00 40.17           O  
ATOM   1602  N   LYS A1077     -33.109  -0.112  -2.217  1.00 18.38           N  
ATOM   1603  CA  LYS A1077     -33.878  -0.515  -3.384  1.00 18.90           C  
ATOM   1604  C   LYS A1077     -32.916  -0.728  -4.540  1.00 20.31           C  
ATOM   1605  O   LYS A1077     -31.718  -0.448  -4.444  1.00 18.54           O  
ATOM   1606  CB  LYS A1077     -34.935   0.526  -3.774  1.00 21.30           C  
ATOM   1607  CG  LYS A1077     -34.345   1.800  -4.366  1.00 28.11           C  
ATOM   1608  CD  LYS A1077     -35.417   2.756  -4.885  1.00 31.70           C  
ATOM   1609  CE  LYS A1077     -36.029   2.276  -6.198  1.00 34.03           C  
ATOM   1610  NZ  LYS A1077     -37.130   3.180  -6.654  1.00 34.36           N  
ATOM   1611  N   GLU A1078     -33.461  -1.226  -5.645  1.00 21.88           N  
ATOM   1612  CA  GLU A1078     -32.747  -1.277  -6.915  1.00 21.22           C  
ATOM   1613  C   GLU A1078     -32.965   0.055  -7.624  1.00 23.79           C  
ATOM   1614  O   GLU A1078     -34.067   0.331  -8.112  1.00 25.24           O  
ATOM   1615  CB  GLU A1078     -33.248  -2.441  -7.764  1.00 20.85           C  
ATOM   1616  CG  GLU A1078     -32.646  -2.513  -9.156  1.00 20.93           C  
ATOM   1617  CD  GLU A1078     -33.397  -3.479 -10.050  1.00 32.20           C  
ATOM   1618  OE1 GLU A1078     -34.636  -3.569  -9.917  1.00 28.34           O  
ATOM   1619  OE2 GLU A1078     -32.751  -4.155 -10.879  1.00 32.67           O  
ATOM   1620  N   LEU A1079     -31.929   0.892  -7.658  1.00 18.74           N  
ATOM   1621  CA  LEU A1079     -32.032   2.168  -8.352  1.00 20.78           C  
ATOM   1622  C   LEU A1079     -32.313   1.945  -9.832  1.00 20.61           C  
ATOM   1623  O   LEU A1079     -31.763   1.031 -10.451  1.00 22.24           O  
ATOM   1624  CB  LEU A1079     -30.742   2.974  -8.181  1.00 18.94           C  
ATOM   1625  CG  LEU A1079     -30.323   3.354  -6.758  1.00 17.82           C  
ATOM   1626  CD1 LEU A1079     -28.961   4.035  -6.774  1.00 20.11           C  
ATOM   1627  CD2 LEU A1079     -31.369   4.246  -6.104  1.00 23.54           C  
ATOM   1628  N   ASN A1080     -33.181   2.777 -10.400  1.00 21.29           N  
ATOM   1629  CA  ASN A1080     -33.420   2.712 -11.832  1.00 19.25           C  
ATOM   1630  C   ASN A1080     -32.428   3.611 -12.566  1.00 23.76           C  
ATOM   1631  O   ASN A1080     -31.728   4.430 -11.968  1.00 22.31           O  
ATOM   1632  CB  ASN A1080     -34.865   3.095 -12.172  1.00 24.64           C  
ATOM   1633  CG  ASN A1080     -35.246   4.473 -11.668  1.00 30.49           C  
ATOM   1634  OD1 ASN A1080     -34.602   5.470 -11.994  1.00 26.43           O  
ATOM   1635  ND2 ASN A1080     -36.312   4.539 -10.880  1.00 28.42           N  
ATOM   1636  N   GLU A1081     -32.378   3.444 -13.889  1.00 21.52           N  
ATOM   1637  CA  GLU A1081     -31.424   4.191 -14.703  1.00 25.83           C  
ATOM   1638  C   GLU A1081     -31.589   5.696 -14.520  1.00 25.47           C  
ATOM   1639  O   GLU A1081     -30.601   6.441 -14.520  1.00 26.24           O  
ATOM   1640  CB  GLU A1081     -31.592   3.807 -16.171  1.00 31.45           C  
ATOM   1641  CG  GLU A1081     -30.299   3.489 -16.890  1.00 36.91           C  
ATOM   1642  CD  GLU A1081     -30.546   2.952 -18.281  1.00 44.76           C  
ATOM   1643  OE1 GLU A1081     -30.100   1.824 -18.579  1.00 45.67           O  
ATOM   1644  OE2 GLU A1081     -31.204   3.656 -19.070  1.00 44.12           O  
ATOM   1645  N   LYS A1082     -32.830   6.160 -14.351  1.00 23.98           N  
ATOM   1646  CA  LYS A1082     -33.071   7.585 -14.148  1.00 29.42           C  
ATOM   1647  C   LYS A1082     -32.467   8.070 -12.834  1.00 24.80           C  
ATOM   1648  O   LYS A1082     -31.834   9.131 -12.789  1.00 24.92           O  
ATOM   1649  CB  LYS A1082     -34.572   7.873 -14.186  1.00 26.55           C  
ATOM   1650  CG  LYS A1082     -34.970   9.049 -15.059  1.00 34.70           C  
ATOM   1651  CD  LYS A1082     -36.476   9.262 -15.032  1.00 33.12           C  
ATOM   1652  CE  LYS A1082     -36.932   9.788 -13.685  1.00 34.15           C  
ATOM   1653  NZ  LYS A1082     -36.385  11.144 -13.405  1.00 37.80           N  
ATOM   1654  N   GLU A1083     -32.660   7.309 -11.750  1.00 20.08           N  
ATOM   1655  CA  GLU A1083     -32.092   7.700 -10.463  1.00 21.19           C  
ATOM   1656  C   GLU A1083     -30.571   7.703 -10.507  1.00 20.36           C  
ATOM   1657  O   GLU A1083     -29.929   8.569  -9.900  1.00 19.80           O  
ATOM   1658  CB  GLU A1083     -32.580   6.766  -9.356  1.00 25.58           C  
ATOM   1659  CG  GLU A1083     -34.079   6.755  -9.138  1.00 29.61           C  
ATOM   1660  CD  GLU A1083     -34.523   5.605  -8.256  1.00 34.24           C  
ATOM   1661  OE1 GLU A1083     -34.466   4.444  -8.713  1.00 31.73           O  
ATOM   1662  OE2 GLU A1083     -34.923   5.862  -7.101  1.00 39.40           O  
ATOM   1663  N   ILE A1084     -29.975   6.740 -11.212  1.00 17.45           N  
ATOM   1664  CA  ILE A1084     -28.521   6.656 -11.274  1.00 19.76           C  
ATOM   1665  C   ILE A1084     -27.943   7.864 -12.002  1.00 19.20           C  
ATOM   1666  O   ILE A1084     -26.957   8.459 -11.556  1.00 17.04           O  
ATOM   1667  CB  ILE A1084     -28.086   5.335 -11.931  1.00 20.28           C  
ATOM   1668  CG1 ILE A1084     -28.600   4.151 -11.111  1.00 17.59           C  
ATOM   1669  CG2 ILE A1084     -26.568   5.278 -12.068  1.00 19.73           C  
ATOM   1670  CD1 ILE A1084     -28.342   2.812 -11.744  1.00 17.63           C  
ATOM   1671  N   LYS A1085     -28.555   8.254 -13.125  1.00 18.90           N  
ATOM   1672  CA  LYS A1085     -28.066   9.434 -13.834  1.00 22.32           C  
ATOM   1673  C   LYS A1085     -28.213  10.696 -12.993  1.00 20.98           C  
ATOM   1674  O   LYS A1085     -27.386  11.609 -13.100  1.00 21.11           O  
ATOM   1675  CB  LYS A1085     -28.788   9.605 -15.173  1.00 29.38           C  
ATOM   1676  CG  LYS A1085     -28.208  10.745 -16.015  1.00 32.92           C  
ATOM   1677  CD  LYS A1085     -28.933  10.936 -17.338  1.00 32.91           C  
ATOM   1678  CE  LYS A1085     -28.228  11.976 -18.207  1.00 37.35           C  
ATOM   1679  NZ  LYS A1085     -28.310  13.351 -17.640  1.00 33.90           N  
ATOM   1680  N   ASP A1086     -29.241  10.765 -12.144  1.00 21.78           N  
ATOM   1681  CA  ASP A1086     -29.415  11.955 -11.318  1.00 25.11           C  
ATOM   1682  C   ASP A1086     -28.365  12.028 -10.215  1.00 21.56           C  
ATOM   1683  O   ASP A1086     -27.910  13.122  -9.860  1.00 21.70           O  
ATOM   1684  CB  ASP A1086     -30.824  11.997 -10.730  1.00 27.06           C  
ATOM   1685  CG  ASP A1086     -31.717  12.999 -11.436  1.00 35.06           C  
ATOM   1686  OD1 ASP A1086     -31.902  12.876 -12.665  1.00 37.41           O  
ATOM   1687  OD2 ASP A1086     -32.212  13.928 -10.764  1.00 38.55           O  
ATOM   1688  N   LEU A1087     -27.975  10.881  -9.651  1.00 19.28           N  
ATOM   1689  CA  LEU A1087     -26.861  10.872  -8.706  1.00 16.59           C  
ATOM   1690  C   LEU A1087     -25.567  11.276  -9.394  1.00 18.84           C  
ATOM   1691  O   LEU A1087     -24.784  12.064  -8.851  1.00 16.47           O  
ATOM   1692  CB  LEU A1087     -26.704   9.490  -8.074  1.00 17.66           C  
ATOM   1693  CG  LEU A1087     -27.826   8.933  -7.204  1.00 26.03           C  
ATOM   1694  CD1 LEU A1087     -27.505   7.497  -6.810  1.00 24.65           C  
ATOM   1695  CD2 LEU A1087     -28.030   9.806  -5.973  1.00 25.26           C  
ATOM   1696  N   TYR A1088     -25.328  10.735 -10.588  1.00 16.04           N  
ATOM   1697  CA  TYR A1088     -24.146  11.101 -11.358  1.00 15.22           C  
ATOM   1698  C   TYR A1088     -24.104  12.601 -11.598  1.00 19.73           C  
ATOM   1699  O   TYR A1088     -23.066  13.246 -11.418  1.00 16.17           O  
ATOM   1700  CB  TYR A1088     -24.151  10.332 -12.678  1.00 13.82           C  
ATOM   1701  CG  TYR A1088     -22.960  10.571 -13.576  1.00 17.13           C  
ATOM   1702  CD1 TYR A1088     -21.663  10.419 -13.103  1.00 12.94           C  
ATOM   1703  CD2 TYR A1088     -23.133  10.907 -14.911  1.00 22.23           C  
ATOM   1704  CE1 TYR A1088     -20.571  10.619 -13.930  1.00 16.36           C  
ATOM   1705  CE2 TYR A1088     -22.047  11.109 -15.748  1.00 22.97           C  
ATOM   1706  CZ  TYR A1088     -20.768  10.962 -15.250  1.00 20.53           C  
ATOM   1707  OH  TYR A1088     -19.677  11.158 -16.066  1.00 21.33           O  
ATOM   1708  N   ASP A1089     -25.243  13.178 -11.977  1.00 15.38           N  
ATOM   1709  CA  ASP A1089     -25.287  14.603 -12.274  1.00 19.32           C  
ATOM   1710  C   ASP A1089     -25.214  15.445 -11.006  1.00 19.05           C  
ATOM   1711  O   ASP A1089     -24.484  16.443 -10.966  1.00 19.54           O  
ATOM   1712  CB  ASP A1089     -26.549  14.928 -13.071  1.00 20.75           C  
ATOM   1713  CG  ASP A1089     -26.510  14.358 -14.474  1.00 25.39           C  
ATOM   1714  OD1 ASP A1089     -25.420  13.942 -14.921  1.00 27.92           O  
ATOM   1715  OD2 ASP A1089     -27.572  14.322 -15.131  1.00 30.97           O  
ATOM   1716  N   ASN A1090     -25.951  15.070  -9.956  1.00 18.64           N  
ATOM   1717  CA  ASN A1090     -25.990  15.943  -8.787  1.00 22.01           C  
ATOM   1718  C   ASN A1090     -24.802  15.751  -7.853  1.00 23.63           C  
ATOM   1719  O   ASN A1090     -24.700  16.470  -6.853  1.00 22.45           O  
ATOM   1720  CB  ASN A1090     -27.331  15.795  -8.035  1.00 21.67           C  
ATOM   1721  CG  ASN A1090     -27.430  14.544  -7.143  1.00 26.41           C  
ATOM   1722  OD1 ASN A1090     -26.442  13.988  -6.669  1.00 23.45           O  
ATOM   1723  ND2 ASN A1090     -28.668  14.118  -6.896  1.00 22.51           N  
ATOM   1724  N   GLN A1091     -23.912  14.805  -8.143  1.00 18.37           N  
ATOM   1725  CA  GLN A1091     -22.644  14.689  -7.438  1.00 15.31           C  
ATOM   1726  C   GLN A1091     -21.463  15.113  -8.303  1.00 19.73           C  
ATOM   1727  O   GLN A1091     -20.314  14.998  -7.867  1.00 15.81           O  
ATOM   1728  CB  GLN A1091     -22.460  13.253  -6.924  1.00 16.09           C  
ATOM   1729  CG  GLN A1091     -23.427  12.931  -5.789  1.00 19.20           C  
ATOM   1730  CD  GLN A1091     -23.384  11.487  -5.337  1.00 17.07           C  
ATOM   1731  OE1 GLN A1091     -22.562  10.697  -5.803  1.00 13.63           O  
ATOM   1732  NE2 GLN A1091     -24.281  11.134  -4.423  1.00 18.38           N  
ATOM   1733  N   SER A1092     -21.724  15.635  -9.503  1.00 18.17           N  
ATOM   1734  CA  SER A1092     -20.660  16.068 -10.398  1.00 19.12           C  
ATOM   1735  C   SER A1092     -20.186  17.492 -10.132  1.00 23.26           C  
ATOM   1736  O   SER A1092     -19.184  17.901 -10.727  1.00 23.01           O  
ATOM   1737  CB  SER A1092     -21.114  15.954 -11.855  1.00 23.00           C  
ATOM   1738  OG  SER A1092     -21.111  14.609 -12.292  1.00 29.38           O  
ATOM   1739  N   ASN A1093     -20.866  18.244  -9.266  1.00 23.78           N  
ATOM   1740  CA  ASN A1093     -20.518  19.636  -8.967  1.00 23.57           C  
ATOM   1741  C   ASN A1093     -20.305  20.427 -10.260  1.00 20.49           C  
ATOM   1742  O   ASN A1093     -19.237  20.987 -10.511  1.00 22.86           O  
ATOM   1743  CB  ASN A1093     -19.273  19.712  -8.075  1.00 24.42           C  
ATOM   1744  CG  ASN A1093     -19.452  18.999  -6.749  1.00 32.44           C  
ATOM   1745  OD1 ASN A1093     -18.636  18.155  -6.376  1.00 34.54           O  
ATOM   1746  ND2 ASN A1093     -20.508  19.346  -6.022  1.00 35.31           N  
ATOM   1747  N   SER A1094     -21.349  20.453 -11.091  1.00 21.68           N  
ATOM   1748  CA  SER A1094     -21.199  20.935 -12.460  1.00 22.65           C  
ATOM   1749  C   SER A1094     -20.902  22.429 -12.551  1.00 23.07           C  
ATOM   1750  O   SER A1094     -20.480  22.888 -13.618  1.00 23.32           O  
ATOM   1751  CB  SER A1094     -22.449  20.601 -13.276  1.00 26.90           C  
ATOM   1752  OG  SER A1094     -23.608  21.195 -12.724  1.00 31.80           O  
ATOM   1753  N   GLY A1095     -21.106  23.192 -11.478  1.00 19.73           N  
ATOM   1754  CA  GLY A1095     -20.729  24.590 -11.473  1.00 21.54           C  
ATOM   1755  C   GLY A1095     -19.256  24.848 -11.281  1.00 20.85           C  
ATOM   1756  O   GLY A1095     -18.819  26.003 -11.309  1.00 16.63           O  
ATOM   1757  N   ILE A1096     -18.476  23.788 -11.087  1.00 20.61           N  
ATOM   1758  CA  ILE A1096     -17.036  23.872 -10.871  1.00 17.03           C  
ATOM   1759  C   ILE A1096     -16.334  23.204 -12.044  1.00 18.34           C  
ATOM   1760  O   ILE A1096     -16.657  22.066 -12.403  1.00 18.69           O  
ATOM   1761  CB  ILE A1096     -16.625  23.205  -9.547  1.00 18.80           C  
ATOM   1762  CG1 ILE A1096     -17.297  23.895  -8.357  1.00 21.62           C  
ATOM   1763  CG2 ILE A1096     -15.113  23.203  -9.405  1.00 18.88           C  
ATOM   1764  CD1 ILE A1096     -17.052  23.196  -7.035  1.00 25.14           C  
ATOM   1765  N   LEU A1097     -15.374  23.904 -12.636  1.00 13.96           N  
ATOM   1766  CA  LEU A1097     -14.602  23.314 -13.715  1.00 15.05           C  
ATOM   1767  C   LEU A1097     -13.707  22.209 -13.171  1.00 13.19           C  
ATOM   1768  O   LEU A1097     -13.244  22.259 -12.029  1.00 14.44           O  
ATOM   1769  CB  LEU A1097     -13.757  24.377 -14.422  1.00 14.15           C  
ATOM   1770  CG  LEU A1097     -14.456  25.195 -15.512  1.00 16.63           C  
ATOM   1771  CD1 LEU A1097     -15.367  26.257 -14.910  1.00 16.60           C  
ATOM   1772  CD2 LEU A1097     -13.440  25.823 -16.449  1.00 13.98           C  
ATOM   1773  N   LYS A1098     -13.470  21.201 -14.000  1.00 15.60           N  
ATOM   1774  CA  LYS A1098     -12.655  20.058 -13.621  1.00 13.73           C  
ATOM   1775  C   LYS A1098     -11.390  19.994 -14.465  1.00 15.33           C  
ATOM   1776  O   LYS A1098     -11.380  20.404 -15.629  1.00 15.95           O  
ATOM   1777  CB  LYS A1098     -13.432  18.749 -13.782  1.00 17.09           C  
ATOM   1778  CG  LYS A1098     -14.822  18.760 -13.173  1.00 21.77           C  
ATOM   1779  CD  LYS A1098     -14.760  19.006 -11.675  1.00 19.17           C  
ATOM   1780  CE  LYS A1098     -16.133  18.857 -11.037  1.00 22.32           C  
ATOM   1781  NZ  LYS A1098     -17.212  19.424 -11.885  1.00 21.53           N  
ATOM   1782  N   ASP A1099     -10.320  19.462 -13.875  1.00 12.59           N  
ATOM   1783  CA  ASP A1099      -9.150  19.137 -14.672  1.00 13.62           C  
ATOM   1784  C   ASP A1099      -9.337  17.761 -15.309  1.00 16.08           C  
ATOM   1785  O   ASP A1099     -10.388  17.124 -15.183  1.00 13.69           O  
ATOM   1786  CB  ASP A1099      -7.865  19.248 -13.838  1.00 16.14           C  
ATOM   1787  CG  ASP A1099      -7.707  18.148 -12.777  1.00 13.69           C  
ATOM   1788  OD1 ASP A1099      -8.406  17.116 -12.813  1.00 16.99           O  
ATOM   1789  OD2 ASP A1099      -6.845  18.329 -11.887  1.00 16.25           O  
ATOM   1790  N   PHE A1100      -8.304  17.301 -16.011  1.00 15.01           N  
ATOM   1791  CA  PHE A1100      -8.432  16.083 -16.806  1.00 17.65           C  
ATOM   1792  C   PHE A1100      -8.714  14.869 -15.928  1.00 14.87           C  
ATOM   1793  O   PHE A1100      -9.473  13.976 -16.324  1.00 17.01           O  
ATOM   1794  CB  PHE A1100      -7.161  15.887 -17.629  1.00 17.24           C  
ATOM   1795  CG  PHE A1100      -7.119  14.607 -18.412  1.00 16.82           C  
ATOM   1796  CD1 PHE A1100      -7.727  14.520 -19.652  1.00 19.23           C  
ATOM   1797  CD2 PHE A1100      -6.421  13.509 -17.933  1.00 14.45           C  
ATOM   1798  CE1 PHE A1100      -7.670  13.350 -20.387  1.00 21.86           C  
ATOM   1799  CE2 PHE A1100      -6.361  12.335 -18.664  1.00 16.06           C  
ATOM   1800  CZ  PHE A1100      -6.987  12.256 -19.893  1.00 17.44           C  
ATOM   1801  N   TRP A1101      -8.126  14.826 -14.729  1.00 13.72           N  
ATOM   1802  CA  TRP A1101      -8.310  13.699 -13.822  1.00 16.84           C  
ATOM   1803  C   TRP A1101      -9.664  13.711 -13.126  1.00 15.62           C  
ATOM   1804  O   TRP A1101     -10.019  12.717 -12.482  1.00 12.47           O  
ATOM   1805  CB  TRP A1101      -7.193  13.680 -12.772  1.00 14.56           C  
ATOM   1806  CG  TRP A1101      -5.819  13.808 -13.362  1.00 14.99           C  
ATOM   1807  CD1 TRP A1101      -4.922  14.814 -13.143  1.00 14.61           C  
ATOM   1808  CD2 TRP A1101      -5.195  12.908 -14.285  1.00 13.31           C  
ATOM   1809  NE1 TRP A1101      -3.775  14.592 -13.866  1.00 15.04           N  
ATOM   1810  CE2 TRP A1101      -3.918  13.429 -14.576  1.00 13.03           C  
ATOM   1811  CE3 TRP A1101      -5.592  11.713 -14.891  1.00 14.53           C  
ATOM   1812  CZ2 TRP A1101      -3.036  12.792 -15.448  1.00 13.76           C  
ATOM   1813  CZ3 TRP A1101      -4.716  11.083 -15.753  1.00 13.14           C  
ATOM   1814  CH2 TRP A1101      -3.453  11.624 -16.025  1.00 14.96           C  
ATOM   1815  N   GLY A1102     -10.424  14.794 -13.237  1.00 13.33           N  
ATOM   1816  CA  GLY A1102     -11.693  14.905 -12.556  1.00 17.65           C  
ATOM   1817  C   GLY A1102     -11.661  15.725 -11.287  1.00 15.05           C  
ATOM   1818  O   GLY A1102     -12.718  15.930 -10.679  1.00 16.78           O  
ATOM   1819  N   ASP A1103     -10.489  16.192 -10.867  1.00 14.34           N  
ATOM   1820  CA  ASP A1103     -10.383  17.057  -9.705  1.00 14.61           C  
ATOM   1821  C   ASP A1103     -10.824  18.476 -10.054  1.00 14.83           C  
ATOM   1822  O   ASP A1103     -10.884  18.865 -11.224  1.00 15.48           O  
ATOM   1823  CB  ASP A1103      -8.947  17.085  -9.181  1.00 17.17           C  
ATOM   1824  CG  ASP A1103      -8.549  15.796  -8.493  1.00 19.54           C  
ATOM   1825  OD1 ASP A1103      -9.405  15.196  -7.808  1.00 20.50           O  
ATOM   1826  OD2 ASP A1103      -7.376  15.390  -8.632  1.00 25.46           O  
ATOM   1827  N   TYR A1104     -11.133  19.252  -9.014  1.00 12.78           N  
ATOM   1828  CA  TYR A1104     -11.436  20.666  -9.199  1.00 18.35           C  
ATOM   1829  C   TYR A1104     -10.289  21.373  -9.911  1.00 13.99           C  
ATOM   1830  O   TYR A1104      -9.126  21.252  -9.515  1.00 14.64           O  
ATOM   1831  CB  TYR A1104     -11.680  21.345  -7.849  1.00 19.98           C  
ATOM   1832  CG  TYR A1104     -12.937  20.934  -7.118  1.00 17.31           C  
ATOM   1833  CD1 TYR A1104     -13.977  20.292  -7.772  1.00 21.52           C  
ATOM   1834  CD2 TYR A1104     -13.089  21.218  -5.767  1.00 23.44           C  
ATOM   1835  CE1 TYR A1104     -15.133  19.927  -7.092  1.00 26.14           C  
ATOM   1836  CE2 TYR A1104     -14.234  20.861  -5.083  1.00 22.87           C  
ATOM   1837  CZ  TYR A1104     -15.252  20.217  -5.747  1.00 28.12           C  
ATOM   1838  OH  TYR A1104     -16.392  19.863  -5.057  1.00 27.55           O  
ATOM   1839  N   LEU A1105     -10.624  22.119 -10.958  1.00 13.74           N  
ATOM   1840  CA  LEU A1105      -9.656  23.014 -11.577  1.00 16.09           C  
ATOM   1841  C   LEU A1105      -9.280  24.119 -10.596  1.00 15.07           C  
ATOM   1842  O   LEU A1105     -10.126  24.619  -9.849  1.00 15.98           O  
ATOM   1843  CB  LEU A1105     -10.236  23.612 -12.858  1.00 12.41           C  
ATOM   1844  CG  LEU A1105      -9.262  24.228 -13.862  1.00 16.78           C  
ATOM   1845  CD1 LEU A1105      -8.407  23.158 -14.521  1.00 14.20           C  
ATOM   1846  CD2 LEU A1105     -10.032  25.019 -14.902  1.00 16.03           C  
ATOM   1847  N   GLN A1106      -8.001  24.498 -10.589  1.00 13.48           N  
ATOM   1848  CA  GLN A1106      -7.495  25.444  -9.603  1.00 14.06           C  
ATOM   1849  C   GLN A1106      -6.748  26.591 -10.267  1.00 14.42           C  
ATOM   1850  O   GLN A1106      -6.231  26.473 -11.380  1.00 12.39           O  
ATOM   1851  CB  GLN A1106      -6.545  24.783  -8.596  1.00 14.62           C  
ATOM   1852  CG  GLN A1106      -7.181  23.772  -7.670  1.00 19.42           C  
ATOM   1853  CD  GLN A1106      -6.214  23.314  -6.596  1.00 22.74           C  
ATOM   1854  OE1 GLN A1106      -5.564  24.136  -5.945  1.00 32.86           O  
ATOM   1855  NE2 GLN A1106      -6.093  22.006  -6.422  1.00 25.23           N  
ATOM   1856  N   TYR A1107      -6.682  27.702  -9.543  1.00 11.54           N  
ATOM   1857  CA  TYR A1107      -5.838  28.821  -9.926  1.00 13.56           C  
ATOM   1858  C   TYR A1107      -4.387  28.556  -9.546  1.00 11.54           C  
ATOM   1859  O   TYR A1107      -4.096  27.840  -8.583  1.00 17.42           O  
ATOM   1860  CB  TYR A1107      -6.313  30.104  -9.242  1.00 15.43           C  
ATOM   1861  CG  TYR A1107      -7.641  30.612  -9.742  1.00 12.35           C  
ATOM   1862  CD1 TYR A1107      -7.722  31.342 -10.916  1.00 13.72           C  
ATOM   1863  CD2 TYR A1107      -8.813  30.368  -9.037  1.00 14.60           C  
ATOM   1864  CE1 TYR A1107      -8.933  31.821 -11.379  1.00 11.96           C  
ATOM   1865  CE2 TYR A1107     -10.034  30.840  -9.493  1.00 16.57           C  
ATOM   1866  CZ  TYR A1107     -10.087  31.567 -10.665  1.00 11.54           C  
ATOM   1867  OH  TYR A1107     -11.296  32.043 -11.130  1.00 15.88           O  
ATOM   1868  N   ASP A1108      -3.474  29.147 -10.323  1.00 13.85           N  
ATOM   1869  CA  ASP A1108      -2.045  29.182  -9.997  1.00 15.11           C  
ATOM   1870  C   ASP A1108      -1.434  27.781  -9.958  1.00 14.23           C  
ATOM   1871  O   ASP A1108      -0.585  27.479  -9.117  1.00 17.47           O  
ATOM   1872  CB  ASP A1108      -1.806  29.922  -8.680  1.00 16.70           C  
ATOM   1873  CG  ASP A1108      -1.994  31.419  -8.823  1.00 20.84           C  
ATOM   1874  OD1 ASP A1108      -1.221  32.034  -9.584  1.00 28.79           O  
ATOM   1875  OD2 ASP A1108      -2.919  31.974  -8.194  1.00 23.44           O  
ATOM   1876  N   LYS A1109      -1.857  26.933 -10.891  1.00 14.62           N  
ATOM   1877  CA  LYS A1109      -1.429  25.542 -10.994  1.00 13.33           C  
ATOM   1878  C   LYS A1109      -1.128  25.242 -12.456  1.00 13.53           C  
ATOM   1879  O   LYS A1109      -2.011  25.400 -13.309  1.00 15.93           O  
ATOM   1880  CB  LYS A1109      -2.521  24.616 -10.447  1.00 17.25           C  
ATOM   1881  CG  LYS A1109      -2.208  23.123 -10.443  1.00 20.32           C  
ATOM   1882  CD  LYS A1109      -3.331  22.368  -9.733  1.00 19.84           C  
ATOM   1883  CE  LYS A1109      -3.115  20.863  -9.722  1.00 25.02           C  
ATOM   1884  NZ  LYS A1109      -1.900  20.459  -8.965  1.00 27.14           N  
ATOM   1885  N   PRO A1110       0.091  24.816 -12.790  1.00 13.31           N  
ATOM   1886  CA  PRO A1110       0.441  24.595 -14.202  1.00 14.49           C  
ATOM   1887  C   PRO A1110      -0.318  23.413 -14.789  1.00 18.38           C  
ATOM   1888  O   PRO A1110      -0.405  22.345 -14.177  1.00 14.89           O  
ATOM   1889  CB  PRO A1110       1.952  24.322 -14.163  1.00 17.68           C  
ATOM   1890  CG  PRO A1110       2.390  24.591 -12.747  1.00 21.30           C  
ATOM   1891  CD  PRO A1110       1.188  24.441 -11.884  1.00 17.43           C  
ATOM   1892  N   TYR A1111      -0.842  23.602 -15.999  1.00 17.74           N  
ATOM   1893  CA  TYR A1111      -1.597  22.570 -16.697  1.00 12.98           C  
ATOM   1894  C   TYR A1111      -1.039  22.372 -18.095  1.00 18.29           C  
ATOM   1895  O   TYR A1111      -0.877  23.341 -18.843  1.00 14.79           O  
ATOM   1896  CB  TYR A1111      -3.078  22.939 -16.806  1.00 14.92           C  
ATOM   1897  CG  TYR A1111      -3.832  22.923 -15.502  1.00 14.33           C  
ATOM   1898  CD1 TYR A1111      -4.036  21.738 -14.809  1.00 14.28           C  
ATOM   1899  CD2 TYR A1111      -4.360  24.091 -14.974  1.00 13.83           C  
ATOM   1900  CE1 TYR A1111      -4.738  21.721 -13.617  1.00 13.67           C  
ATOM   1901  CE2 TYR A1111      -5.060  24.086 -13.787  1.00 14.72           C  
ATOM   1902  CZ  TYR A1111      -5.248  22.902 -13.110  1.00 16.01           C  
ATOM   1903  OH  TYR A1111      -5.955  22.904 -11.926  1.00 12.78           O  
ATOM   1904  N   TYR A1112      -0.766  21.121 -18.450  1.00 16.31           N  
ATOM   1905  CA  TYR A1112      -0.600  20.760 -19.848  1.00 13.70           C  
ATOM   1906  C   TYR A1112      -1.969  20.712 -20.517  1.00 15.61           C  
ATOM   1907  O   TYR A1112      -2.965  20.310 -19.909  1.00 20.14           O  
ATOM   1908  CB  TYR A1112       0.094  19.407 -19.983  1.00 16.78           C  
ATOM   1909  CG  TYR A1112       1.495  19.370 -19.421  1.00 17.40           C  
ATOM   1910  CD1 TYR A1112       2.575  19.830 -20.162  1.00 20.47           C  
ATOM   1911  CD2 TYR A1112       1.738  18.877 -18.147  1.00 18.43           C  
ATOM   1912  CE1 TYR A1112       3.859  19.796 -19.648  1.00 19.90           C  
ATOM   1913  CE2 TYR A1112       3.018  18.840 -17.625  1.00 23.50           C  
ATOM   1914  CZ  TYR A1112       4.076  19.300 -18.378  1.00 21.03           C  
ATOM   1915  OH  TYR A1112       5.351  19.261 -17.857  1.00 26.89           O  
ATOM   1916  N   MET A1113      -2.021  21.129 -21.778  1.00 19.63           N  
ATOM   1917  CA  MET A1113      -3.284  21.269 -22.492  1.00 17.72           C  
ATOM   1918  C   MET A1113      -3.476  20.113 -23.465  1.00 20.82           C  
ATOM   1919  O   MET A1113      -2.552  19.751 -24.204  1.00 24.28           O  
ATOM   1920  CB  MET A1113      -3.353  22.608 -23.233  1.00 20.49           C  
ATOM   1921  CG  MET A1113      -3.243  23.833 -22.327  1.00 19.30           C  
ATOM   1922  SD  MET A1113      -4.327  23.758 -20.882  1.00 19.73           S  
ATOM   1923  CE  MET A1113      -5.935  23.601 -21.657  1.00 20.56           C  
ATOM   1924  N   LEU A1114      -4.669  19.530 -23.446  1.00 22.08           N  
ATOM   1925  CA  LEU A1114      -5.100  18.549 -24.431  1.00 19.13           C  
ATOM   1926  C   LEU A1114      -6.300  19.130 -25.165  1.00 20.81           C  
ATOM   1927  O   LEU A1114      -7.283  19.523 -24.531  1.00 21.57           O  
ATOM   1928  CB  LEU A1114      -5.463  17.221 -23.765  1.00 20.26           C  
ATOM   1929  CG  LEU A1114      -6.160  16.168 -24.632  1.00 23.82           C  
ATOM   1930  CD1 LEU A1114      -5.180  15.555 -25.623  1.00 22.47           C  
ATOM   1931  CD2 LEU A1114      -6.813  15.095 -23.765  1.00 25.45           C  
ATOM   1932  N   ASN A1115      -6.205  19.220 -26.488  1.00 23.07           N  
ATOM   1933  CA  ASN A1115      -7.344  19.604 -27.313  1.00 20.57           C  
ATOM   1934  C   ASN A1115      -8.029  18.331 -27.796  1.00 25.81           C  
ATOM   1935  O   ASN A1115      -7.407  17.506 -28.474  1.00 28.40           O  
ATOM   1936  CB  ASN A1115      -6.909  20.468 -28.495  1.00 21.12           C  
ATOM   1937  CG  ASN A1115      -8.088  21.054 -29.249  1.00 27.64           C  
ATOM   1938  OD1 ASN A1115      -8.789  20.349 -29.976  1.00 27.16           O  
ATOM   1939  ND2 ASN A1115      -8.317  22.351 -29.073  1.00 24.20           N  
ATOM   1940  N   LEU A1116      -9.306  18.168 -27.443  1.00 25.78           N  
ATOM   1941  CA  LEU A1116     -10.018  16.923 -27.709  1.00 29.26           C  
ATOM   1942  C   LEU A1116     -10.351  16.718 -29.181  1.00 31.90           C  
ATOM   1943  O   LEU A1116     -10.657  15.587 -29.575  1.00 28.68           O  
ATOM   1944  CB  LEU A1116     -11.303  16.869 -26.879  1.00 26.10           C  
ATOM   1945  CG  LEU A1116     -11.110  16.772 -25.364  1.00 27.09           C  
ATOM   1946  CD1 LEU A1116     -12.449  16.837 -24.647  1.00 31.50           C  
ATOM   1947  CD2 LEU A1116     -10.359  15.502 -24.998  1.00 26.51           C  
ATOM   1948  N   TYR A1117     -10.305  17.769 -29.999  1.00 30.44           N  
ATOM   1949  CA  TYR A1117     -10.563  17.629 -31.427  1.00 34.85           C  
ATOM   1950  C   TYR A1117      -9.318  17.212 -32.197  1.00 33.75           C  
ATOM   1951  O   TYR A1117      -9.433  16.589 -33.260  1.00 31.84           O  
ATOM   1952  CB  TYR A1117     -11.121  18.943 -31.986  1.00 33.26           C  
ATOM   1953  CG  TYR A1117     -11.582  18.883 -33.430  1.00 38.10           C  
ATOM   1954  CD1 TYR A1117     -12.681  18.118 -33.800  1.00 40.66           C  
ATOM   1955  CD2 TYR A1117     -10.935  19.616 -34.417  1.00 35.84           C  
ATOM   1956  CE1 TYR A1117     -13.110  18.069 -35.117  1.00 43.20           C  
ATOM   1957  CE2 TYR A1117     -11.356  19.575 -35.736  1.00 42.19           C  
ATOM   1958  CZ  TYR A1117     -12.444  18.800 -36.080  1.00 46.41           C  
ATOM   1959  OH  TYR A1117     -12.865  18.759 -37.390  1.00 57.21           O  
ATOM   1960  N   ASP A1118      -8.134  17.529 -31.674  1.00 29.59           N  
ATOM   1961  CA  ASP A1118      -6.857  17.095 -32.241  1.00 30.47           C  
ATOM   1962  C   ASP A1118      -6.023  16.533 -31.095  1.00 31.06           C  
ATOM   1963  O   ASP A1118      -5.068  17.170 -30.633  1.00 28.11           O  
ATOM   1964  CB  ASP A1118      -6.146  18.250 -32.951  1.00 35.76           C  
ATOM   1965  CG  ASP A1118      -5.250  17.780 -34.084  1.00 40.63           C  
ATOM   1966  OD1 ASP A1118      -4.690  16.670 -33.987  1.00 43.51           O  
ATOM   1967  OD2 ASP A1118      -5.107  18.524 -35.076  1.00 42.19           O  
ATOM   1968  N   PRO A1119      -6.368  15.337 -30.604  1.00 30.74           N  
ATOM   1969  CA  PRO A1119      -5.739  14.837 -29.372  1.00 23.48           C  
ATOM   1970  C   PRO A1119      -4.291  14.392 -29.516  1.00 25.84           C  
ATOM   1971  O   PRO A1119      -3.621  14.225 -28.488  1.00 30.45           O  
ATOM   1972  CB  PRO A1119      -6.640  13.655 -28.982  1.00 32.12           C  
ATOM   1973  CG  PRO A1119      -7.246  13.208 -30.258  1.00 32.90           C  
ATOM   1974  CD  PRO A1119      -7.447  14.452 -31.072  1.00 31.37           C  
ATOM   1975  N   ASN A1120      -3.775  14.195 -30.728  1.00 24.14           N  
ATOM   1976  CA  ASN A1120      -2.383  13.791 -30.888  1.00 27.47           C  
ATOM   1977  C   ASN A1120      -1.442  14.975 -31.063  1.00 28.34           C  
ATOM   1978  O   ASN A1120      -0.275  14.779 -31.415  1.00 26.61           O  
ATOM   1979  CB  ASN A1120      -2.230  12.833 -32.070  1.00 30.42           C  
ATOM   1980  CG  ASN A1120      -1.007  11.943 -31.937  1.00 34.88           C  
ATOM   1981  OD1 ASN A1120      -0.531  11.683 -30.829  1.00 33.92           O  
ATOM   1982  ND2 ASN A1120      -0.484  11.483 -33.066  1.00 36.55           N  
ATOM   1983  N   LYS A1121      -1.919  16.190 -30.826  1.00 27.88           N  
ATOM   1984  CA  LYS A1121      -1.100  17.385 -30.929  1.00 24.39           C  
ATOM   1985  C   LYS A1121      -1.013  18.076 -29.577  1.00 25.60           C  
ATOM   1986  O   LYS A1121      -1.814  17.826 -28.672  1.00 26.57           O  
ATOM   1987  CB  LYS A1121      -1.663  18.341 -31.985  1.00 31.04           C  
ATOM   1988  CG  LYS A1121      -1.494  17.831 -33.401  1.00 33.15           C  
ATOM   1989  CD  LYS A1121      -1.991  18.834 -34.420  1.00 34.05           C  
ATOM   1990  CE  LYS A1121      -1.361  18.572 -35.772  1.00 38.22           C  
ATOM   1991  NZ  LYS A1121       0.101  18.840 -35.717  1.00 42.53           N  
ATOM   1992  N   TYR A1122      -0.015  18.947 -29.447  1.00 23.03           N  
ATOM   1993  CA  TYR A1122       0.194  19.701 -28.222  1.00 23.00           C  
ATOM   1994  C   TYR A1122       0.513  21.149 -28.573  1.00 23.99           C  
ATOM   1995  O   TYR A1122       0.894  21.471 -29.701  1.00 23.84           O  
ATOM   1996  CB  TYR A1122       1.302  19.075 -27.357  1.00 21.58           C  
ATOM   1997  CG  TYR A1122       2.648  18.937 -28.036  1.00 25.77           C  
ATOM   1998  CD1 TYR A1122       3.002  17.760 -28.685  1.00 32.01           C  
ATOM   1999  CD2 TYR A1122       3.575  19.969 -28.002  1.00 26.76           C  
ATOM   2000  CE1 TYR A1122       4.235  17.623 -29.298  1.00 27.66           C  
ATOM   2001  CE2 TYR A1122       4.810  19.843 -28.612  1.00 30.00           C  
ATOM   2002  CZ  TYR A1122       5.134  18.667 -29.258  1.00 29.72           C  
ATOM   2003  OH  TYR A1122       6.361  18.533 -29.866  1.00 32.16           O  
ATOM   2004  N   VAL A1123       0.344  22.020 -27.587  1.00 20.69           N  
ATOM   2005  CA  VAL A1123       0.464  23.461 -27.779  1.00 24.12           C  
ATOM   2006  C   VAL A1123       1.926  23.866 -27.688  1.00 26.04           C  
ATOM   2007  O   VAL A1123       2.642  23.455 -26.769  1.00 22.47           O  
ATOM   2008  CB  VAL A1123      -0.381  24.220 -26.738  1.00 21.88           C  
ATOM   2009  CG1 VAL A1123      -0.124  25.722 -26.820  1.00 25.05           C  
ATOM   2010  CG2 VAL A1123      -1.858  23.910 -26.924  1.00 18.91           C  
ATOM   2011  N   ASP A1124       2.377  24.679 -28.642  1.00 27.72           N  
ATOM   2012  CA  ASP A1124       3.683  25.311 -28.540  1.00 26.85           C  
ATOM   2013  C   ASP A1124       3.574  26.759 -28.995  1.00 25.96           C  
ATOM   2014  O   ASP A1124       2.543  27.199 -29.511  1.00 24.53           O  
ATOM   2015  CB  ASP A1124       4.752  24.568 -29.350  1.00 27.80           C  
ATOM   2016  CG  ASP A1124       6.163  24.925 -28.911  1.00 30.07           C  
ATOM   2017  OD1 ASP A1124       7.112  24.230 -29.326  1.00 41.56           O  
ATOM   2018  OD2 ASP A1124       6.317  25.899 -28.140  1.00 38.85           O  
ATOM   2019  N   VAL A1125       4.663  27.497 -28.795  1.00 23.84           N  
ATOM   2020  CA  VAL A1125       4.729  28.924 -29.073  1.00 23.49           C  
ATOM   2021  C   VAL A1125       5.813  29.161 -30.112  1.00 26.36           C  
ATOM   2022  O   VAL A1125       6.946  28.688 -29.956  1.00 25.83           O  
ATOM   2023  CB  VAL A1125       5.008  29.738 -27.795  1.00 24.24           C  
ATOM   2024  CG1 VAL A1125       5.259  31.199 -28.132  1.00 24.52           C  
ATOM   2025  CG2 VAL A1125       3.855  29.613 -26.816  1.00 25.20           C  
ATOM   2026  N   ASN A1126       5.460  29.877 -31.173  1.00 24.91           N  
ATOM   2027  CA  ASN A1126       6.392  30.343 -32.195  1.00 31.06           C  
ATOM   2028  C   ASN A1126       6.584  31.835 -31.926  1.00 25.09           C  
ATOM   2029  O   ASN A1126       5.826  32.666 -32.428  1.00 29.71           O  
ATOM   2030  CB  ASN A1126       5.837  30.063 -33.600  1.00 31.71           C  
ATOM   2031  CG  ASN A1126       6.760  30.533 -34.715  1.00 36.08           C  
ATOM   2032  OD1 ASN A1126       7.056  31.721 -34.839  1.00 37.09           O  
ATOM   2033  ND2 ASN A1126       7.193  29.597 -35.554  1.00 39.07           N  
ATOM   2034  N   ASN A1127       7.594  32.157 -31.106  1.00 30.63           N  
ATOM   2035  CA  ASN A1127       7.924  33.511 -30.657  1.00 24.32           C  
ATOM   2036  C   ASN A1127       6.925  34.050 -29.639  1.00 24.73           C  
ATOM   2037  O   ASN A1127       5.710  33.899 -29.809  1.00 28.53           O  
ATOM   2038  CB  ASN A1127       8.016  34.494 -31.831  1.00 31.29           C  
ATOM   2039  CG  ASN A1127       9.343  34.423 -32.549  1.00 31.22           C  
ATOM   2040  OD1 ASN A1127       9.392  34.340 -33.775  1.00 36.35           O  
ATOM   2041  ND2 ASN A1127      10.429  34.461 -31.788  1.00 26.27           N  
ATOM   2042  N   VAL A1128       7.431  34.681 -28.579  1.00 24.27           N  
ATOM   2043  CA  VAL A1128       6.597  35.472 -27.681  1.00 23.50           C  
ATOM   2044  C   VAL A1128       6.444  36.853 -28.299  1.00 26.78           C  
ATOM   2045  O   VAL A1128       7.159  37.201 -29.246  1.00 27.01           O  
ATOM   2046  CB  VAL A1128       7.192  35.557 -26.264  1.00 27.86           C  
ATOM   2047  CG1 VAL A1128       7.252  34.176 -25.628  1.00 26.38           C  
ATOM   2048  CG2 VAL A1128       8.573  36.213 -26.299  1.00 26.61           C  
ATOM   2049  N   GLY A1129       5.517  37.649 -27.778  1.00 24.94           N  
ATOM   2050  CA  GLY A1129       5.273  38.974 -28.303  1.00 27.18           C  
ATOM   2051  C   GLY A1129       4.209  38.984 -29.386  1.00 27.04           C  
ATOM   2052  O   GLY A1129       3.761  37.948 -29.884  1.00 25.96           O  
ATOM   2053  N   ILE A1130       3.807  40.201 -29.763  1.00 24.28           N  
ATOM   2054  CA  ILE A1130       2.665  40.374 -30.655  1.00 27.14           C  
ATOM   2055  C   ILE A1130       2.946  39.856 -32.062  1.00 25.17           C  
ATOM   2056  O   ILE A1130       2.005  39.593 -32.820  1.00 32.22           O  
ATOM   2057  CB  ILE A1130       2.242  41.856 -30.682  1.00 29.80           C  
ATOM   2058  CG1 ILE A1130       0.832  42.001 -31.259  1.00 37.36           C  
ATOM   2059  CG2 ILE A1130       3.250  42.686 -31.464  1.00 31.53           C  
ATOM   2060  CD1 ILE A1130      -0.199  41.135 -30.561  1.00 30.88           C  
ATOM   2061  N   ARG A1131       4.216  39.693 -32.434  1.00 27.87           N  
ATOM   2062  CA  ARG A1131       4.535  39.102 -33.726  1.00 28.82           C  
ATOM   2063  C   ARG A1131       4.403  37.584 -33.726  1.00 30.75           C  
ATOM   2064  O   ARG A1131       4.316  36.982 -34.801  1.00 31.39           O  
ATOM   2065  CB  ARG A1131       5.953  39.488 -34.149  1.00 29.85           C  
ATOM   2066  CG  ARG A1131       6.234  40.979 -34.070  1.00 35.21           C  
ATOM   2067  CD  ARG A1131       7.031  41.462 -35.270  1.00 43.09           C  
ATOM   2068  NE  ARG A1131       8.179  40.608 -35.561  1.00 42.95           N  
ATOM   2069  CZ  ARG A1131       8.997  40.784 -36.595  1.00 42.39           C  
ATOM   2070  NH1 ARG A1131      10.018  39.959 -36.786  1.00 37.40           N  
ATOM   2071  NH2 ARG A1131       8.796  41.787 -37.438  1.00 43.15           N  
ATOM   2072  N   GLY A1132       4.380  36.953 -32.551  1.00 25.73           N  
ATOM   2073  CA  GLY A1132       4.331  35.510 -32.463  1.00 24.80           C  
ATOM   2074  C   GLY A1132       2.915  34.972 -32.373  1.00 23.69           C  
ATOM   2075  O   GLY A1132       1.931  35.709 -32.336  1.00 24.59           O  
ATOM   2076  N   TYR A1133       2.827  33.645 -32.341  1.00 25.36           N  
ATOM   2077  CA  TYR A1133       1.551  32.959 -32.219  1.00 24.70           C  
ATOM   2078  C   TYR A1133       1.772  31.638 -31.498  1.00 24.47           C  
ATOM   2079  O   TYR A1133       2.900  31.164 -31.351  1.00 25.40           O  
ATOM   2080  CB  TYR A1133       0.900  32.725 -33.591  1.00 24.06           C  
ATOM   2081  CG  TYR A1133       1.732  31.878 -34.532  1.00 24.77           C  
ATOM   2082  CD1 TYR A1133       1.637  30.490 -34.524  1.00 24.95           C  
ATOM   2083  CD2 TYR A1133       2.610  32.466 -35.430  1.00 30.59           C  
ATOM   2084  CE1 TYR A1133       2.399  29.714 -35.380  1.00 27.18           C  
ATOM   2085  CE2 TYR A1133       3.374  31.700 -36.292  1.00 29.89           C  
ATOM   2086  CZ  TYR A1133       3.265  30.326 -36.263  1.00 32.72           C  
ATOM   2087  OH  TYR A1133       4.026  29.563 -37.121  1.00 28.51           O  
ATOM   2088  N   MET A1134       0.670  31.051 -31.046  1.00 23.16           N  
ATOM   2089  CA  MET A1134       0.658  29.717 -30.470  1.00 24.55           C  
ATOM   2090  C   MET A1134      -0.001  28.758 -31.452  1.00 28.42           C  
ATOM   2091  O   MET A1134      -0.875  29.151 -32.229  1.00 25.05           O  
ATOM   2092  CB  MET A1134      -0.082  29.704 -29.132  1.00 24.98           C  
ATOM   2093  CG  MET A1134       0.623  30.505 -28.053  1.00 30.79           C  
ATOM   2094  SD  MET A1134      -0.257  30.518 -26.482  1.00 39.56           S  
ATOM   2095  CE  MET A1134      -1.600  31.634 -26.871  1.00 23.42           C  
ATOM   2096  N   TYR A1135       0.430  27.500 -31.424  1.00 24.96           N  
ATOM   2097  CA  TYR A1135      -0.022  26.560 -32.438  1.00 26.98           C  
ATOM   2098  C   TYR A1135       0.036  25.138 -31.899  1.00 28.74           C  
ATOM   2099  O   TYR A1135       0.735  24.845 -30.925  1.00 28.96           O  
ATOM   2100  CB  TYR A1135       0.809  26.687 -33.722  1.00 27.30           C  
ATOM   2101  CG  TYR A1135       2.242  26.209 -33.601  1.00 28.75           C  
ATOM   2102  CD1 TYR A1135       3.184  26.936 -32.881  1.00 26.90           C  
ATOM   2103  CD2 TYR A1135       2.657  25.040 -34.223  1.00 32.14           C  
ATOM   2104  CE1 TYR A1135       4.496  26.503 -32.774  1.00 28.02           C  
ATOM   2105  CE2 TYR A1135       3.966  24.599 -34.124  1.00 31.12           C  
ATOM   2106  CZ  TYR A1135       4.880  25.334 -33.399  1.00 31.96           C  
ATOM   2107  OH  TYR A1135       6.183  24.896 -33.300  1.00 35.02           O  
ATOM   2108  N   LEU A1136      -0.725  24.262 -32.551  1.00 28.42           N  
ATOM   2109  CA  LEU A1136      -0.724  22.841 -32.240  1.00 24.11           C  
ATOM   2110  C   LEU A1136       0.339  22.139 -33.073  1.00 29.62           C  
ATOM   2111  O   LEU A1136       0.478  22.401 -34.272  1.00 32.65           O  
ATOM   2112  CB  LEU A1136      -2.099  22.222 -32.510  1.00 27.78           C  
ATOM   2113  CG  LEU A1136      -3.250  22.681 -31.612  1.00 25.93           C  
ATOM   2114  CD1 LEU A1136      -4.515  21.880 -31.890  1.00 31.59           C  
ATOM   2115  CD2 LEU A1136      -2.864  22.580 -30.147  1.00 30.21           C  
ATOM   2116  N   LYS A1137       1.092  21.250 -32.429  1.00 29.48           N  
ATOM   2117  CA  LYS A1137       2.180  20.530 -33.074  1.00 31.92           C  
ATOM   2118  C   LYS A1137       2.149  19.073 -32.639  1.00 29.93           C  
ATOM   2119  O   LYS A1137       1.893  18.773 -31.470  1.00 32.18           O  
ATOM   2120  CB  LYS A1137       3.536  21.167 -32.730  1.00 31.84           C  
ATOM   2121  CG  LYS A1137       4.729  20.232 -32.831  1.00 36.63           C  
ATOM   2122  CD  LYS A1137       5.971  20.976 -33.288  1.00 35.77           C  
ATOM   2123  CE  LYS A1137       7.151  20.035 -33.453  1.00 40.88           C  
ATOM   2124  NZ  LYS A1137       6.790  18.806 -34.211  1.00 45.99           N  
ATOM   2125  N   GLY A1138       2.405  18.170 -33.581  1.00 35.76           N  
ATOM   2126  CA  GLY A1138       2.429  16.750 -33.279  1.00 30.90           C  
ATOM   2127  C   GLY A1138       3.753  16.097 -33.624  1.00 34.71           C  
ATOM   2128  O   GLY A1138       4.646  16.749 -34.162  1.00 38.99           O  
ATOM   2129  N   PRO A1139       3.901  14.805 -33.299  1.00 32.48           N  
ATOM   2130  CA  PRO A1139       2.941  13.999 -32.541  1.00 31.91           C  
ATOM   2131  C   PRO A1139       3.272  13.953 -31.051  1.00 28.71           C  
ATOM   2132  O   PRO A1139       4.368  14.344 -30.648  1.00 28.33           O  
ATOM   2133  CB  PRO A1139       3.093  12.617 -33.170  1.00 33.35           C  
ATOM   2134  CG  PRO A1139       4.554  12.561 -33.530  1.00 35.25           C  
ATOM   2135  CD  PRO A1139       4.978  13.975 -33.868  1.00 35.05           C  
ATOM   2136  N   ARG A1140       2.333  13.466 -30.237  1.00 28.95           N  
ATOM   2137  CA  ARG A1140       2.587  13.389 -28.803  1.00 24.96           C  
ATOM   2138  C   ARG A1140       3.647  12.349 -28.476  1.00 27.31           C  
ATOM   2139  O   ARG A1140       4.469  12.552 -27.574  1.00 28.59           O  
ATOM   2140  CB  ARG A1140       1.297  13.075 -28.049  1.00 28.49           C  
ATOM   2141  CG  ARG A1140       0.421  14.281 -27.854  1.00 23.65           C  
ATOM   2142  CD  ARG A1140      -0.814  13.981 -27.034  1.00 26.66           C  
ATOM   2143  NE  ARG A1140      -1.524  15.222 -26.749  1.00 24.01           N  
ATOM   2144  CZ  ARG A1140      -1.234  16.023 -25.729  1.00 23.89           C  
ATOM   2145  NH1 ARG A1140      -0.259  15.701 -24.890  1.00 21.74           N  
ATOM   2146  NH2 ARG A1140      -1.921  17.142 -25.544  1.00 21.56           N  
ATOM   2147  N   GLY A1141       3.646  11.232 -29.190  1.00 26.57           N  
ATOM   2148  CA  GLY A1141       4.410  10.086 -28.758  1.00 25.79           C  
ATOM   2149  C   GLY A1141       3.694   9.393 -27.619  1.00 24.46           C  
ATOM   2150  O   GLY A1141       2.630   9.811 -27.158  1.00 23.00           O  
ATOM   2151  N   SER A1142       4.298   8.314 -27.144  1.00 24.90           N  
ATOM   2152  CA  SER A1142       3.640   7.451 -26.182  1.00 22.11           C  
ATOM   2153  C   SER A1142       4.481   7.289 -24.924  1.00 23.04           C  
ATOM   2154  O   SER A1142       5.676   7.591 -24.898  1.00 27.19           O  
ATOM   2155  CB  SER A1142       3.353   6.073 -26.789  1.00 26.47           C  
ATOM   2156  OG  SER A1142       2.646   6.198 -28.009  1.00 33.98           O  
ATOM   2157  N   VAL A1143       3.820   6.823 -23.868  1.00 20.28           N  
ATOM   2158  CA  VAL A1143       4.474   6.251 -22.699  1.00 21.11           C  
ATOM   2159  C   VAL A1143       4.084   4.783 -22.646  1.00 23.46           C  
ATOM   2160  O   VAL A1143       2.954   4.421 -23.000  1.00 19.50           O  
ATOM   2161  CB  VAL A1143       4.084   6.977 -21.396  1.00 20.90           C  
ATOM   2162  CG1 VAL A1143       4.648   8.384 -21.389  1.00 20.79           C  
ATOM   2163  CG2 VAL A1143       2.572   7.016 -21.239  1.00 21.82           C  
ATOM   2164  N   MET A1144       5.016   3.933 -22.226  1.00 23.24           N  
ATOM   2165  CA  MET A1144       4.710   2.511 -22.213  1.00 25.78           C  
ATOM   2166  C   MET A1144       5.645   1.774 -21.270  1.00 26.66           C  
ATOM   2167  O   MET A1144       6.767   2.214 -21.004  1.00 25.79           O  
ATOM   2168  CB  MET A1144       4.799   1.895 -23.618  1.00 26.40           C  
ATOM   2169  CG  MET A1144       6.197   1.856 -24.220  1.00 31.16           C  
ATOM   2170  SD  MET A1144       6.836   3.469 -24.713  1.00 48.65           S  
ATOM   2171  CE  MET A1144       5.961   3.736 -26.251  1.00 30.20           C  
ATOM   2172  N   THR A1145       5.143   0.657 -20.751  1.00 27.00           N  
ATOM   2173  CA  THR A1145       5.954  -0.393 -20.149  1.00 28.03           C  
ATOM   2174  C   THR A1145       5.422  -1.713 -20.678  1.00 32.59           C  
ATOM   2175  O   THR A1145       4.282  -2.081 -20.372  1.00 30.72           O  
ATOM   2176  CB  THR A1145       5.883  -0.379 -18.619  1.00 30.84           C  
ATOM   2177  OG1 THR A1145       6.439   0.839 -18.114  1.00 29.50           O  
ATOM   2178  CG2 THR A1145       6.651  -1.570 -18.045  1.00 30.57           C  
ATOM   2179  N   THR A1146       6.233  -2.406 -21.487  1.00 31.59           N  
ATOM   2180  CA  THR A1146       5.884  -3.720 -22.023  1.00 34.14           C  
ATOM   2181  C   THR A1146       4.467  -3.623 -22.593  1.00 37.22           C  
ATOM   2182  O   THR A1146       4.133  -2.621 -23.235  1.00 46.59           O  
ATOM   2183  CB  THR A1146       6.054  -4.780 -20.913  1.00 30.37           C  
ATOM   2184  OG1 THR A1146       7.423  -4.788 -20.492  1.00 48.27           O  
ATOM   2185  CG2 THR A1146       5.754  -6.202 -21.381  1.00 40.50           C  
ATOM   2186  N   ASN A1147       3.623  -4.625 -22.366  1.00 34.90           N  
ATOM   2187  CA  ASN A1147       2.180  -4.501 -22.537  1.00 29.29           C  
ATOM   2188  C   ASN A1147       1.489  -4.398 -21.187  1.00 29.14           C  
ATOM   2189  O   ASN A1147       0.432  -4.992 -20.973  1.00 27.18           O  
ATOM   2190  CB  ASN A1147       1.621  -5.670 -23.341  1.00 30.19           C  
ATOM   2191  CG  ASN A1147       2.235  -5.778 -24.721  1.00 35.05           C  
ATOM   2192  OD1 ASN A1147       3.389  -5.408 -24.932  1.00 38.86           O  
ATOM   2193  ND2 ASN A1147       1.458  -6.281 -25.676  1.00 39.53           N  
ATOM   2194  N   ILE A1148       2.102  -3.684 -20.241  1.00 23.43           N  
ATOM   2195  CA  ILE A1148       1.378  -3.295 -19.037  1.00 24.42           C  
ATOM   2196  C   ILE A1148       0.540  -2.056 -19.313  1.00 20.30           C  
ATOM   2197  O   ILE A1148      -0.628  -1.982 -18.916  1.00 18.11           O  
ATOM   2198  CB  ILE A1148       2.343  -3.076 -17.859  1.00 23.73           C  
ATOM   2199  CG1 ILE A1148       3.255  -4.293 -17.676  1.00 26.52           C  
ATOM   2200  CG2 ILE A1148       1.556  -2.812 -16.582  1.00 22.35           C  
ATOM   2201  CD1 ILE A1148       2.521  -5.556 -17.302  1.00 29.81           C  
ATOM   2202  N   TYR A1149       1.111  -1.077 -20.012  1.00 19.92           N  
ATOM   2203  CA  TYR A1149       0.339   0.063 -20.485  1.00 19.05           C  
ATOM   2204  C   TYR A1149       1.012   0.643 -21.720  1.00 19.64           C  
ATOM   2205  O   TYR A1149       2.221   0.498 -21.919  1.00 20.27           O  
ATOM   2206  CB  TYR A1149       0.177   1.133 -19.399  1.00 19.75           C  
ATOM   2207  CG  TYR A1149       1.469   1.748 -18.895  1.00 20.22           C  
ATOM   2208  CD1 TYR A1149       2.138   1.215 -17.801  1.00 20.89           C  
ATOM   2209  CD2 TYR A1149       2.006   2.877 -19.502  1.00 19.22           C  
ATOM   2210  CE1 TYR A1149       3.312   1.782 -17.332  1.00 21.84           C  
ATOM   2211  CE2 TYR A1149       3.177   3.450 -19.042  1.00 19.02           C  
ATOM   2212  CZ  TYR A1149       3.826   2.900 -17.957  1.00 23.21           C  
ATOM   2213  OH  TYR A1149       4.994   3.471 -17.497  1.00 23.77           O  
ATOM   2214  N   LEU A1150       0.198   1.293 -22.555  1.00 19.46           N  
ATOM   2215  CA  LEU A1150       0.698   1.992 -23.738  1.00 18.21           C  
ATOM   2216  C   LEU A1150      -0.300   3.113 -24.022  1.00 20.50           C  
ATOM   2217  O   LEU A1150      -1.400   2.848 -24.514  1.00 16.62           O  
ATOM   2218  CB  LEU A1150       0.846   1.055 -24.927  1.00 21.33           C  
ATOM   2219  CG  LEU A1150       1.187   1.725 -26.262  1.00 21.59           C  
ATOM   2220  CD1 LEU A1150       2.428   2.608 -26.140  1.00 23.95           C  
ATOM   2221  CD2 LEU A1150       1.365   0.687 -27.363  1.00 22.86           C  
ATOM   2222  N   ASN A1151       0.086   4.344 -23.695  1.00 17.12           N  
ATOM   2223  CA  ASN A1151      -0.809   5.488 -23.749  1.00 18.69           C  
ATOM   2224  C   ASN A1151      -0.110   6.656 -24.427  1.00 17.89           C  
ATOM   2225  O   ASN A1151       1.116   6.686 -24.539  1.00 21.35           O  
ATOM   2226  CB  ASN A1151      -1.249   5.914 -22.345  1.00 15.18           C  
ATOM   2227  CG  ASN A1151      -1.561   4.738 -21.450  1.00 18.21           C  
ATOM   2228  OD1 ASN A1151      -0.857   4.486 -20.471  1.00 18.36           O  
ATOM   2229  ND2 ASN A1151      -2.619   4.009 -21.778  1.00 19.62           N  
ATOM   2230  N   SER A1152      -0.903   7.632 -24.862  1.00 18.18           N  
ATOM   2231  CA  SER A1152      -0.336   8.876 -25.364  1.00 18.92           C  
ATOM   2232  C   SER A1152       0.339   9.644 -24.237  1.00 17.62           C  
ATOM   2233  O   SER A1152      -0.146   9.667 -23.102  1.00 18.13           O  
ATOM   2234  CB  SER A1152      -1.418   9.746 -26.002  1.00 21.94           C  
ATOM   2235  OG  SER A1152      -1.920   9.161 -27.190  1.00 25.72           O  
ATOM   2236  N   SER A1153       1.468  10.275 -24.554  1.00 19.24           N  
ATOM   2237  CA  SER A1153       2.126  11.142 -23.587  1.00 13.57           C  
ATOM   2238  C   SER A1153       1.253  12.360 -23.310  1.00 20.13           C  
ATOM   2239  O   SER A1153       0.798  13.035 -24.238  1.00 19.14           O  
ATOM   2240  CB  SER A1153       3.500  11.567 -24.105  1.00 20.33           C  
ATOM   2241  OG  SER A1153       4.120  12.491 -23.226  1.00 26.44           O  
ATOM   2242  N   LEU A1154       1.008  12.634 -22.029  1.00 15.18           N  
ATOM   2243  CA  LEU A1154       0.150  13.743 -21.635  1.00 15.33           C  
ATOM   2244  C   LEU A1154       0.921  14.980 -21.196  1.00 18.12           C  
ATOM   2245  O   LEU A1154       0.362  16.081 -21.235  1.00 21.38           O  
ATOM   2246  CB  LEU A1154      -0.794  13.306 -20.505  1.00 13.28           C  
ATOM   2247  CG  LEU A1154      -1.741  12.147 -20.830  1.00 16.64           C  
ATOM   2248  CD1 LEU A1154      -2.644  11.839 -19.644  1.00 16.40           C  
ATOM   2249  CD2 LEU A1154      -2.565  12.460 -22.070  1.00 15.23           C  
ATOM   2250  N   TYR A1155       2.180  14.832 -20.791  1.00 19.56           N  
ATOM   2251  CA  TYR A1155       2.973  15.958 -20.299  1.00 19.90           C  
ATOM   2252  C   TYR A1155       3.778  16.561 -21.450  1.00 18.71           C  
ATOM   2253  O   TYR A1155       5.005  16.471 -21.507  1.00 26.55           O  
ATOM   2254  CB  TYR A1155       3.894  15.506 -19.166  1.00 22.02           C  
ATOM   2255  CG  TYR A1155       3.219  14.908 -17.946  1.00 20.26           C  
ATOM   2256  CD1 TYR A1155       1.862  15.081 -17.707  1.00 19.50           C  
ATOM   2257  CD2 TYR A1155       3.957  14.179 -17.022  1.00 19.89           C  
ATOM   2258  CE1 TYR A1155       1.259  14.534 -16.586  1.00 19.31           C  
ATOM   2259  CE2 TYR A1155       3.366  13.630 -15.901  1.00 23.44           C  
ATOM   2260  CZ  TYR A1155       2.018  13.811 -15.688  1.00 18.38           C  
ATOM   2261  OH  TYR A1155       1.427  13.265 -14.572  1.00 21.14           O  
ATOM   2262  N   ARG A1156       3.065  17.187 -22.385  1.00 17.65           N  
ATOM   2263  CA  ARG A1156       3.692  17.750 -23.573  1.00 20.88           C  
ATOM   2264  C   ARG A1156       3.232  19.184 -23.786  1.00 18.59           C  
ATOM   2265  O   ARG A1156       2.070  19.516 -23.538  1.00 20.71           O  
ATOM   2266  CB  ARG A1156       3.368  16.929 -24.830  1.00 21.46           C  
ATOM   2267  CG  ARG A1156       3.893  15.499 -24.832  1.00 24.93           C  
ATOM   2268  CD  ARG A1156       5.397  15.423 -24.607  1.00 28.95           C  
ATOM   2269  NE  ARG A1156       6.164  16.239 -25.547  1.00 33.96           N  
ATOM   2270  CZ  ARG A1156       6.440  15.885 -26.798  1.00 36.29           C  
ATOM   2271  NH1 ARG A1156       5.998  14.732 -27.280  1.00 34.50           N  
ATOM   2272  NH2 ARG A1156       7.152  16.692 -27.573  1.00 39.17           N  
ATOM   2273  N   GLY A1157       4.150  20.028 -24.255  1.00 22.48           N  
ATOM   2274  CA  GLY A1157       3.794  21.358 -24.704  1.00 20.45           C  
ATOM   2275  C   GLY A1157       3.862  22.420 -23.627  1.00 20.40           C  
ATOM   2276  O   GLY A1157       4.222  22.184 -22.472  1.00 19.40           O  
ATOM   2277  N   THR A1158       3.503  23.634 -24.032  1.00 19.80           N  
ATOM   2278  CA  THR A1158       3.543  24.771 -23.126  1.00 20.48           C  
ATOM   2279  C   THR A1158       2.413  24.668 -22.113  1.00 22.44           C  
ATOM   2280  O   THR A1158       1.293  24.271 -22.447  1.00 24.94           O  
ATOM   2281  CB  THR A1158       3.438  26.084 -23.900  1.00 28.78           C  
ATOM   2282  OG1 THR A1158       2.107  26.243 -24.395  1.00 31.45           O  
ATOM   2283  CG2 THR A1158       4.396  26.087 -25.071  1.00 28.78           C  
ATOM   2284  N   LYS A1159       2.717  25.023 -20.870  1.00 18.90           N  
ATOM   2285  CA  LYS A1159       1.762  24.919 -19.781  1.00 17.93           C  
ATOM   2286  C   LYS A1159       0.971  26.213 -19.624  1.00 17.31           C  
ATOM   2287  O   LYS A1159       1.488  27.313 -19.838  1.00 19.04           O  
ATOM   2288  CB  LYS A1159       2.484  24.581 -18.476  1.00 17.24           C  
ATOM   2289  CG  LYS A1159       3.146  23.208 -18.486  1.00 22.48           C  
ATOM   2290  CD  LYS A1159       3.925  22.948 -17.202  1.00 24.60           C  
ATOM   2291  CE  LYS A1159       5.296  23.612 -17.224  1.00 27.30           C  
ATOM   2292  NZ  LYS A1159       6.153  23.083 -18.322  1.00 36.41           N  
ATOM   2293  N   PHE A1160      -0.299  26.066 -19.260  1.00 17.80           N  
ATOM   2294  CA  PHE A1160      -1.167  27.191 -18.944  1.00 16.04           C  
ATOM   2295  C   PHE A1160      -1.305  27.298 -17.433  1.00 17.95           C  
ATOM   2296  O   PHE A1160      -1.379  26.282 -16.736  1.00 15.38           O  
ATOM   2297  CB  PHE A1160      -2.565  27.039 -19.561  1.00 18.93           C  
ATOM   2298  CG  PHE A1160      -2.618  27.217 -21.059  1.00 26.00           C  
ATOM   2299  CD1 PHE A1160      -1.477  27.141 -21.839  1.00 25.15           C  
ATOM   2300  CD2 PHE A1160      -3.833  27.468 -21.684  1.00 21.17           C  
ATOM   2301  CE1 PHE A1160      -1.544  27.303 -23.213  1.00 30.88           C  
ATOM   2302  CE2 PHE A1160      -3.906  27.634 -23.055  1.00 21.18           C  
ATOM   2303  CZ  PHE A1160      -2.761  27.551 -23.820  1.00 27.55           C  
ATOM   2304  N   ILE A1161      -1.348  28.527 -16.933  1.00 11.39           N  
ATOM   2305  CA  ILE A1161      -1.626  28.808 -15.529  1.00 14.62           C  
ATOM   2306  C   ILE A1161      -2.776  29.801 -15.476  1.00 16.81           C  
ATOM   2307  O   ILE A1161      -2.708  30.862 -16.107  1.00 15.72           O  
ATOM   2308  CB  ILE A1161      -0.395  29.375 -14.797  1.00 14.71           C  
ATOM   2309  CG1 ILE A1161       0.717  28.326 -14.711  1.00 16.80           C  
ATOM   2310  CG2 ILE A1161      -0.781  29.889 -13.414  1.00 15.92           C  
ATOM   2311  CD1 ILE A1161       2.044  28.901 -14.267  1.00 18.34           C  
ATOM   2312  N   ILE A1162      -3.827  29.462 -14.735  1.00 13.30           N  
ATOM   2313  CA  ILE A1162      -5.021  30.297 -14.652  1.00 14.50           C  
ATOM   2314  C   ILE A1162      -4.862  31.281 -13.500  1.00 13.80           C  
ATOM   2315  O   ILE A1162      -4.569  30.885 -12.365  1.00 15.48           O  
ATOM   2316  CB  ILE A1162      -6.282  29.434 -14.481  1.00 14.92           C  
ATOM   2317  CG1 ILE A1162      -6.396  28.445 -15.640  1.00 16.55           C  
ATOM   2318  CG2 ILE A1162      -7.524  30.314 -14.422  1.00 16.82           C  
ATOM   2319  CD1 ILE A1162      -7.332  27.294 -15.377  1.00 15.06           C  
ATOM   2320  N   LYS A1163      -5.061  32.564 -13.790  1.00 13.04           N  
ATOM   2321  CA  LYS A1163      -4.839  33.633 -12.828  1.00 15.26           C  
ATOM   2322  C   LYS A1163      -6.162  34.265 -12.421  1.00 14.37           C  
ATOM   2323  O   LYS A1163      -7.012  34.549 -13.270  1.00 13.13           O  
ATOM   2324  CB  LYS A1163      -3.921  34.715 -13.408  1.00 14.04           C  
ATOM   2325  CG  LYS A1163      -2.578  34.206 -13.894  1.00 17.52           C  
ATOM   2326  CD  LYS A1163      -1.726  33.718 -12.738  1.00 16.93           C  
ATOM   2327  CE  LYS A1163      -1.481  34.814 -11.720  1.00 18.67           C  
ATOM   2328  NZ  LYS A1163      -0.673  34.319 -10.571  1.00 18.65           N  
ATOM   2329  N   LYS A1164      -6.322  34.498 -11.122  1.00 14.86           N  
ATOM   2330  CA  LYS A1164      -7.516  35.167 -10.626  1.00 15.70           C  
ATOM   2331  C   LYS A1164      -7.600  36.595 -11.145  1.00 15.90           C  
ATOM   2332  O   LYS A1164      -6.601  37.318 -11.193  1.00 14.54           O  
ATOM   2333  CB  LYS A1164      -7.529  35.194  -9.100  1.00 19.04           C  
ATOM   2334  CG  LYS A1164      -7.944  33.907  -8.433  1.00 21.16           C  
ATOM   2335  CD  LYS A1164      -8.772  34.233  -7.203  1.00 23.90           C  
ATOM   2336  CE  LYS A1164      -8.758  33.109  -6.195  1.00 23.74           C  
ATOM   2337  NZ  LYS A1164      -9.533  33.486  -4.980  1.00 27.27           N  
ATOM   2338  N   TYR A1165      -8.813  37.002 -11.517  1.00 14.90           N  
ATOM   2339  CA  TYR A1165      -9.089  38.389 -11.870  1.00 16.87           C  
ATOM   2340  C   TYR A1165     -10.408  38.823 -11.239  1.00 16.92           C  
ATOM   2341  O   TYR A1165     -10.445  39.777 -10.454  1.00 16.25           O  
ATOM   2342  CB  TYR A1165      -9.104  38.562 -13.391  1.00 14.42           C  
ATOM   2343  CG  TYR A1165      -9.775  39.833 -13.857  1.00 16.29           C  
ATOM   2344  CD1 TYR A1165      -9.336  41.077 -13.422  1.00 23.49           C  
ATOM   2345  CD2 TYR A1165     -10.846  39.786 -14.737  1.00 19.61           C  
ATOM   2346  CE1 TYR A1165      -9.955  42.240 -13.847  1.00 19.68           C  
ATOM   2347  CE2 TYR A1165     -11.468  40.938 -15.169  1.00 22.99           C  
ATOM   2348  CZ  TYR A1165     -11.020  42.161 -14.722  1.00 27.98           C  
ATOM   2349  OH  TYR A1165     -11.646  43.307 -15.157  1.00 25.21           O  
ATOM   2350  N   ALA A1166     -11.496  38.119 -11.555  1.00 19.20           N  
ATOM   2351  CA  ALA A1166     -12.794  38.364 -10.918  1.00 17.55           C  
ATOM   2352  C   ALA A1166     -13.482  37.007 -10.754  1.00 14.15           C  
ATOM   2353  O   ALA A1166     -14.232  36.565 -11.629  1.00 19.20           O  
ATOM   2354  CB  ALA A1166     -13.635  39.344 -11.727  1.00 15.66           C  
ATOM   2355  N   SER A1167     -13.215  36.346  -9.632  1.00 18.64           N  
ATOM   2356  CA  SER A1167     -13.745  35.017  -9.365  1.00 18.71           C  
ATOM   2357  C   SER A1167     -14.979  35.101  -8.475  1.00 20.92           C  
ATOM   2358  O   SER A1167     -15.167  36.058  -7.719  1.00 22.39           O  
ATOM   2359  CB  SER A1167     -12.685  34.131  -8.705  1.00 19.97           C  
ATOM   2360  OG  SER A1167     -12.460  34.521  -7.362  1.00 25.27           O  
ATOM   2361  N   GLY A1168     -15.822  34.072  -8.568  1.00 20.03           N  
ATOM   2362  CA  GLY A1168     -17.020  34.034  -7.749  1.00 21.40           C  
ATOM   2363  C   GLY A1168     -16.760  33.761  -6.283  1.00 22.42           C  
ATOM   2364  O   GLY A1168     -17.661  33.947  -5.459  1.00 23.87           O  
ATOM   2365  N   ASN A1169     -15.549  33.335  -5.932  1.00 20.45           N  
ATOM   2366  CA  ASN A1169     -15.271  32.901  -4.572  1.00 26.93           C  
ATOM   2367  C   ASN A1169     -13.828  33.234  -4.224  1.00 23.56           C  
ATOM   2368  O   ASN A1169     -12.976  33.390  -5.103  1.00 25.12           O  
ATOM   2369  CB  ASN A1169     -15.535  31.398  -4.407  1.00 24.33           C  
ATOM   2370  CG  ASN A1169     -15.581  30.971  -2.957  1.00 23.37           C  
ATOM   2371  OD1 ASN A1169     -14.547  30.790  -2.316  1.00 25.59           O  
ATOM   2372  ND2 ASN A1169     -16.788  30.811  -2.428  1.00 28.92           N  
ATOM   2373  N   LYS A1170     -13.560  33.338  -2.920  1.00 22.86           N  
ATOM   2374  CA  LYS A1170     -12.221  33.667  -2.450  1.00 24.68           C  
ATOM   2375  C   LYS A1170     -11.292  32.461  -2.389  1.00 24.79           C  
ATOM   2376  O   LYS A1170     -10.086  32.648  -2.200  1.00 24.07           O  
ATOM   2377  CB  LYS A1170     -12.284  34.317  -1.065  1.00 30.69           C  
ATOM   2378  CG  LYS A1170     -12.623  33.345   0.052  1.00 34.36           C  
ATOM   2379  CD  LYS A1170     -12.847  34.058   1.376  1.00 35.03           C  
ATOM   2380  CE  LYS A1170     -13.159  33.056   2.478  1.00 43.02           C  
ATOM   2381  NZ  LYS A1170     -13.468  33.717   3.776  1.00 44.39           N  
ATOM   2382  N   ASP A1171     -11.809  31.241  -2.532  1.00 24.04           N  
ATOM   2383  CA  ASP A1171     -10.951  30.063  -2.485  1.00 23.83           C  
ATOM   2384  C   ASP A1171     -10.211  29.934  -3.817  1.00 23.63           C  
ATOM   2385  O   ASP A1171     -10.259  30.824  -4.670  1.00 23.09           O  
ATOM   2386  CB  ASP A1171     -11.752  28.813  -2.106  1.00 24.43           C  
ATOM   2387  CG  ASP A1171     -12.794  28.409  -3.152  1.00 23.82           C  
ATOM   2388  OD1 ASP A1171     -12.750  28.882  -4.307  1.00 24.96           O  
ATOM   2389  OD2 ASP A1171     -13.663  27.577  -2.809  1.00 25.50           O  
ATOM   2390  N   ASN A1172      -9.515  28.814  -4.017  1.00 21.60           N  
ATOM   2391  CA  ASN A1172      -8.610  28.663  -5.148  1.00 19.85           C  
ATOM   2392  C   ASN A1172      -9.198  27.830  -6.280  1.00 18.36           C  
ATOM   2393  O   ASN A1172      -8.447  27.336  -7.128  1.00 14.80           O  
ATOM   2394  CB  ASN A1172      -7.292  28.042  -4.690  1.00 22.30           C  
ATOM   2395  CG  ASN A1172      -6.132  28.432  -5.579  1.00 21.63           C  
ATOM   2396  OD1 ASN A1172      -5.938  29.610  -5.878  1.00 24.63           O  
ATOM   2397  ND2 ASN A1172      -5.378  27.442  -6.040  1.00 20.55           N  
ATOM   2398  N   ILE A1173     -10.517  27.682  -6.325  1.00 16.96           N  
ATOM   2399  CA  ILE A1173     -11.188  26.782  -7.257  1.00 17.29           C  
ATOM   2400  C   ILE A1173     -11.797  27.586  -8.399  1.00 15.59           C  
ATOM   2401  O   ILE A1173     -12.435  28.620  -8.172  1.00 18.02           O  
ATOM   2402  CB  ILE A1173     -12.261  25.962  -6.515  1.00 18.09           C  
ATOM   2403  CG1 ILE A1173     -11.593  24.968  -5.563  1.00 22.19           C  
ATOM   2404  CG2 ILE A1173     -13.143  25.235  -7.487  1.00 16.50           C  
ATOM   2405  CD1 ILE A1173     -12.527  24.380  -4.533  1.00 25.12           C  
ATOM   2406  N   VAL A1174     -11.613  27.108  -9.629  1.00 14.74           N  
ATOM   2407  CA  VAL A1174     -12.133  27.786 -10.815  1.00 12.91           C  
ATOM   2408  C   VAL A1174     -13.579  27.357 -11.042  1.00 13.15           C  
ATOM   2409  O   VAL A1174     -13.870  26.165 -11.193  1.00 17.60           O  
ATOM   2410  CB  VAL A1174     -11.272  27.491 -12.052  1.00 16.19           C  
ATOM   2411  CG1 VAL A1174     -11.761  28.314 -13.240  1.00 16.53           C  
ATOM   2412  CG2 VAL A1174      -9.808  27.787 -11.758  1.00 13.24           C  
ATOM   2413  N   ARG A1175     -14.485  28.329 -11.088  1.00 15.00           N  
ATOM   2414  CA  ARG A1175     -15.907  28.054 -11.209  1.00 15.96           C  
ATOM   2415  C   ARG A1175     -16.475  28.617 -12.505  1.00 16.56           C  
ATOM   2416  O   ARG A1175     -15.919  29.535 -13.116  1.00 15.22           O  
ATOM   2417  CB  ARG A1175     -16.675  28.622 -10.013  1.00 19.48           C  
ATOM   2418  CG  ARG A1175     -16.435  27.847  -8.738  1.00 23.01           C  
ATOM   2419  CD  ARG A1175     -17.168  28.442  -7.558  1.00 25.42           C  
ATOM   2420  NE  ARG A1175     -16.945  27.642  -6.359  1.00 28.47           N  
ATOM   2421  CZ  ARG A1175     -15.847  27.705  -5.613  1.00 28.14           C  
ATOM   2422  NH1 ARG A1175     -14.866  28.538  -5.937  1.00 23.49           N  
ATOM   2423  NH2 ARG A1175     -15.729  26.934  -4.543  1.00 30.53           N  
ATOM   2424  N   ASN A1176     -17.601  28.034 -12.917  1.00 18.48           N  
ATOM   2425  CA  ASN A1176     -18.327  28.501 -14.090  1.00 18.40           C  
ATOM   2426  C   ASN A1176     -18.549  30.006 -14.019  1.00 16.49           C  
ATOM   2427  O   ASN A1176     -19.011  30.529 -13.002  1.00 20.77           O  
ATOM   2428  CB  ASN A1176     -19.669  27.767 -14.186  1.00 19.08           C  
ATOM   2429  CG  ASN A1176     -20.364  27.992 -15.510  1.00 23.70           C  
ATOM   2430  OD1 ASN A1176     -19.783  27.780 -16.574  1.00 23.22           O  
ATOM   2431  ND2 ASN A1176     -21.618  28.429 -15.454  1.00 29.77           N  
ATOM   2432  N   ASN A1177     -18.185  30.696 -15.102  1.00 18.70           N  
ATOM   2433  CA  ASN A1177     -18.315  32.143 -15.315  1.00 20.93           C  
ATOM   2434  C   ASN A1177     -17.275  32.960 -14.560  1.00 18.80           C  
ATOM   2435  O   ASN A1177     -17.391  34.196 -14.526  1.00 19.10           O  
ATOM   2436  CB  ASN A1177     -19.710  32.667 -14.957  1.00 18.91           C  
ATOM   2437  CG  ASN A1177     -20.767  32.203 -15.934  1.00 26.68           C  
ATOM   2438  OD1 ASN A1177     -20.474  31.963 -17.105  1.00 28.04           O  
ATOM   2439  ND2 ASN A1177     -22.000  32.064 -15.459  1.00 32.83           N  
ATOM   2440  N   ASP A1178     -16.274  32.329 -13.947  1.00 13.32           N  
ATOM   2441  CA  ASP A1178     -15.140  33.089 -13.440  1.00 17.19           C  
ATOM   2442  C   ASP A1178     -14.478  33.835 -14.589  1.00 14.80           C  
ATOM   2443  O   ASP A1178     -14.343  33.309 -15.696  1.00 17.59           O  
ATOM   2444  CB  ASP A1178     -14.113  32.178 -12.764  1.00 14.24           C  
ATOM   2445  CG  ASP A1178     -14.488  31.817 -11.344  1.00 14.04           C  
ATOM   2446  OD1 ASP A1178     -15.532  32.296 -10.855  1.00 15.85           O  
ATOM   2447  OD2 ASP A1178     -13.722  31.056 -10.707  1.00 15.88           O  
ATOM   2448  N   ARG A1179     -14.073  35.070 -14.325  1.00 15.77           N  
ATOM   2449  CA  ARG A1179     -13.322  35.861 -15.288  1.00 14.94           C  
ATOM   2450  C   ARG A1179     -11.855  35.822 -14.888  1.00 13.42           C  
ATOM   2451  O   ARG A1179     -11.506  36.174 -13.757  1.00 15.97           O  
ATOM   2452  CB  ARG A1179     -13.850  37.294 -15.341  1.00 15.83           C  
ATOM   2453  CG  ARG A1179     -15.369  37.329 -15.462  1.00 20.72           C  
ATOM   2454  CD  ARG A1179     -15.933  38.738 -15.475  1.00 23.83           C  
ATOM   2455  NE  ARG A1179     -15.600  39.438 -16.713  1.00 26.77           N  
ATOM   2456  CZ  ARG A1179     -16.253  39.271 -17.858  1.00 31.21           C  
ATOM   2457  NH1 ARG A1179     -17.273  38.425 -17.922  1.00 29.72           N  
ATOM   2458  NH2 ARG A1179     -15.889  39.946 -18.939  1.00 34.13           N  
ATOM   2459  N   VAL A1180     -11.003  35.359 -15.801  1.00 12.43           N  
ATOM   2460  CA  VAL A1180      -9.622  35.028 -15.479  1.00 13.22           C  
ATOM   2461  C   VAL A1180      -8.692  35.613 -16.536  1.00 13.38           C  
ATOM   2462  O   VAL A1180      -9.117  36.051 -17.605  1.00 14.94           O  
ATOM   2463  CB  VAL A1180      -9.395  33.501 -15.381  1.00 11.63           C  
ATOM   2464  CG1 VAL A1180     -10.428  32.855 -14.478  1.00 12.63           C  
ATOM   2465  CG2 VAL A1180      -9.416  32.866 -16.767  1.00 11.66           C  
ATOM   2466  N   TYR A1181      -7.405  35.622 -16.205  1.00 13.37           N  
ATOM   2467  CA  TYR A1181      -6.334  35.754 -17.178  1.00 13.53           C  
ATOM   2468  C   TYR A1181      -5.623  34.413 -17.295  1.00 14.92           C  
ATOM   2469  O   TYR A1181      -5.521  33.663 -16.320  1.00 17.31           O  
ATOM   2470  CB  TYR A1181      -5.320  36.833 -16.773  1.00 15.85           C  
ATOM   2471  CG  TYR A1181      -5.874  38.235 -16.643  1.00 14.08           C  
ATOM   2472  CD1 TYR A1181      -6.653  38.795 -17.645  1.00 15.01           C  
ATOM   2473  CD2 TYR A1181      -5.588  39.010 -15.526  1.00 16.71           C  
ATOM   2474  CE1 TYR A1181      -7.152  40.085 -17.531  1.00 17.46           C  
ATOM   2475  CE2 TYR A1181      -6.079  40.301 -15.401  1.00 20.39           C  
ATOM   2476  CZ  TYR A1181      -6.860  40.833 -16.407  1.00 19.01           C  
ATOM   2477  OH  TYR A1181      -7.350  42.115 -16.286  1.00 26.35           O  
ATOM   2478  N   ILE A1182      -5.131  34.109 -18.491  1.00 11.30           N  
ATOM   2479  CA  ILE A1182      -4.411  32.865 -18.743  1.00 14.10           C  
ATOM   2480  C   ILE A1182      -2.946  33.201 -18.963  1.00 15.94           C  
ATOM   2481  O   ILE A1182      -2.609  33.983 -19.861  1.00 16.49           O  
ATOM   2482  CB  ILE A1182      -4.980  32.102 -19.947  1.00 10.56           C  
ATOM   2483  CG1 ILE A1182      -6.441  31.724 -19.699  1.00 15.35           C  
ATOM   2484  CG2 ILE A1182      -4.136  30.859 -20.224  1.00 12.35           C  
ATOM   2485  CD1 ILE A1182      -6.622  30.684 -18.623  1.00 16.31           C  
ATOM   2486  N   ASN A1183      -2.077  32.618 -18.145  1.00 14.29           N  
ATOM   2487  CA  ASN A1183      -0.640  32.747 -18.320  1.00 16.81           C  
ATOM   2488  C   ASN A1183      -0.103  31.552 -19.093  1.00 16.11           C  
ATOM   2489  O   ASN A1183      -0.572  30.424 -18.919  1.00 17.30           O  
ATOM   2490  CB  ASN A1183       0.081  32.874 -16.976  1.00 16.25           C  
ATOM   2491  CG  ASN A1183       0.018  34.281 -16.414  1.00 12.87           C  
ATOM   2492  OD1 ASN A1183      -0.603  35.168 -17.004  1.00 16.80           O  
ATOM   2493  ND2 ASN A1183       0.671  34.497 -15.278  1.00 16.68           N  
ATOM   2494  N   VAL A1184       0.877  31.812 -19.954  1.00 15.75           N  
ATOM   2495  CA  VAL A1184       1.518  30.792 -20.774  1.00 16.83           C  
ATOM   2496  C   VAL A1184       2.974  30.695 -20.343  1.00 17.32           C  
ATOM   2497  O   VAL A1184       3.643  31.720 -20.175  1.00 18.22           O  
ATOM   2498  CB  VAL A1184       1.416  31.124 -22.278  1.00 20.16           C  
ATOM   2499  CG1 VAL A1184       1.924  29.963 -23.120  1.00 27.21           C  
ATOM   2500  CG2 VAL A1184      -0.011  31.497 -22.649  1.00 28.10           C  
ATOM   2501  N   VAL A1185       3.464  29.471 -20.173  1.00 18.53           N  
ATOM   2502  CA  VAL A1185       4.826  29.237 -19.703  1.00 18.76           C  
ATOM   2503  C   VAL A1185       5.688  28.893 -20.910  1.00 20.75           C  
ATOM   2504  O   VAL A1185       5.500  27.848 -21.544  1.00 19.41           O  
ATOM   2505  CB  VAL A1185       4.885  28.128 -18.643  1.00 16.11           C  
ATOM   2506  CG1 VAL A1185       6.325  27.926 -18.165  1.00 21.88           C  
ATOM   2507  CG2 VAL A1185       3.959  28.444 -17.475  1.00 18.52           C  
ATOM   2508  N   VAL A1186       6.632  29.774 -21.232  1.00 19.94           N  
ATOM   2509  CA  VAL A1186       7.617  29.543 -22.282  1.00 21.41           C  
ATOM   2510  C   VAL A1186       8.992  29.685 -21.649  1.00 23.64           C  
ATOM   2511  O   VAL A1186       9.329  30.755 -21.127  1.00 22.95           O  
ATOM   2512  CB  VAL A1186       7.458  30.520 -23.457  1.00 24.22           C  
ATOM   2513  CG1 VAL A1186       8.273  30.046 -24.655  1.00 23.38           C  
ATOM   2514  CG2 VAL A1186       5.990  30.698 -23.828  1.00 23.46           C  
ATOM   2515  N   LYS A1187       9.779  28.612 -21.693  1.00 28.87           N  
ATOM   2516  CA  LYS A1187      11.126  28.588 -21.123  1.00 25.44           C  
ATOM   2517  C   LYS A1187      11.109  28.996 -19.650  1.00 27.89           C  
ATOM   2518  O   LYS A1187      11.910  29.816 -19.194  1.00 27.42           O  
ATOM   2519  CB  LYS A1187      12.078  29.476 -21.930  1.00 29.90           C  
ATOM   2520  CG  LYS A1187      12.131  29.165 -23.424  1.00 32.98           C  
ATOM   2521  CD  LYS A1187      12.414  27.693 -23.695  1.00 33.09           C  
ATOM   2522  CE  LYS A1187      11.219  27.001 -24.337  1.00 42.80           C  
ATOM   2523  NZ  LYS A1187      11.430  25.537 -24.475  1.00 45.59           N  
ATOM   2524  N   ASN A1188      10.166  28.416 -18.905  1.00 24.01           N  
ATOM   2525  CA  ASN A1188      10.014  28.619 -17.463  1.00 27.25           C  
ATOM   2526  C   ASN A1188       9.707  30.068 -17.094  1.00 24.08           C  
ATOM   2527  O   ASN A1188       9.947  30.484 -15.956  1.00 27.87           O  
ATOM   2528  CB  ASN A1188      11.254  28.138 -16.697  1.00 27.76           C  
ATOM   2529  CG  ASN A1188      11.474  26.646 -16.827  1.00 28.88           C  
ATOM   2530  OD1 ASN A1188      10.755  25.847 -16.227  1.00 33.69           O  
ATOM   2531  ND2 ASN A1188      12.471  26.262 -17.614  1.00 29.22           N  
ATOM   2532  N   LYS A1189       9.173  30.853 -18.025  1.00 25.23           N  
ATOM   2533  CA  LYS A1189       8.758  32.219 -17.744  1.00 24.53           C  
ATOM   2534  C   LYS A1189       7.313  32.397 -18.181  1.00 21.05           C  
ATOM   2535  O   LYS A1189       6.908  31.883 -19.228  1.00 19.66           O  
ATOM   2536  CB  LYS A1189       9.654  33.242 -18.451  1.00 22.25           C  
ATOM   2537  CG  LYS A1189       9.160  34.671 -18.319  1.00 24.86           C  
ATOM   2538  CD  LYS A1189      10.150  35.656 -18.903  1.00 27.45           C  
ATOM   2539  CE  LYS A1189       9.594  37.070 -18.886  1.00 28.10           C  
ATOM   2540  NZ  LYS A1189      10.605  38.056 -19.349  1.00 36.22           N  
ATOM   2541  N   GLU A1190       6.537  33.118 -17.377  1.00 15.99           N  
ATOM   2542  CA  GLU A1190       5.110  33.262 -17.620  1.00 16.56           C  
ATOM   2543  C   GLU A1190       4.833  34.470 -18.505  1.00 19.78           C  
ATOM   2544  O   GLU A1190       5.307  35.579 -18.231  1.00 18.90           O  
ATOM   2545  CB  GLU A1190       4.344  33.374 -16.301  1.00 20.25           C  
ATOM   2546  CG  GLU A1190       4.374  32.085 -15.497  1.00 22.32           C  
ATOM   2547  CD  GLU A1190       3.653  32.186 -14.172  1.00 24.44           C  
ATOM   2548  OE1 GLU A1190       2.465  32.574 -14.161  1.00 21.19           O  
ATOM   2549  OE2 GLU A1190       4.278  31.868 -13.137  1.00 21.84           O  
ATOM   2550  N   TYR A1191       4.082  34.237 -19.574  1.00 19.11           N  
ATOM   2551  CA  TYR A1191       3.573  35.270 -20.458  1.00 15.02           C  
ATOM   2552  C   TYR A1191       2.055  35.248 -20.396  1.00 17.38           C  
ATOM   2553  O   TYR A1191       1.454  34.338 -19.826  1.00 17.57           O  
ATOM   2554  CB  TYR A1191       4.051  35.062 -21.896  1.00 15.15           C  
ATOM   2555  CG  TYR A1191       5.546  35.100 -22.022  1.00 18.66           C  
ATOM   2556  CD1 TYR A1191       6.305  33.961 -21.813  1.00 19.22           C  
ATOM   2557  CD2 TYR A1191       6.202  36.281 -22.328  1.00 21.27           C  
ATOM   2558  CE1 TYR A1191       7.680  33.991 -21.918  1.00 23.51           C  
ATOM   2559  CE2 TYR A1191       7.576  36.324 -22.436  1.00 20.46           C  
ATOM   2560  CZ  TYR A1191       8.311  35.175 -22.230  1.00 23.70           C  
ATOM   2561  OH  TYR A1191       9.684  35.204 -22.334  1.00 29.25           O  
ATOM   2562  N   ARG A1192       1.434  36.252 -21.004  1.00 13.51           N  
ATOM   2563  CA  ARG A1192      -0.011  36.432 -20.948  1.00 15.64           C  
ATOM   2564  C   ARG A1192      -0.627  36.096 -22.298  1.00 17.64           C  
ATOM   2565  O   ARG A1192      -0.208  36.632 -23.328  1.00 17.89           O  
ATOM   2566  CB  ARG A1192      -0.363  37.866 -20.547  1.00 17.91           C  
ATOM   2567  CG  ARG A1192      -1.839  38.215 -20.668  1.00 16.44           C  
ATOM   2568  CD  ARG A1192      -2.677  37.483 -19.632  1.00 15.39           C  
ATOM   2569  NE  ARG A1192      -1.976  37.322 -18.362  1.00 16.02           N  
ATOM   2570  CZ  ARG A1192      -1.858  38.269 -17.435  1.00 17.95           C  
ATOM   2571  NH1 ARG A1192      -2.385  39.471 -17.631  1.00 15.88           N  
ATOM   2572  NH2 ARG A1192      -1.204  38.013 -16.313  1.00 16.97           N  
ATOM   2573  N   LEU A1193      -1.615  35.205 -22.291  1.00 15.03           N  
ATOM   2574  CA  LEU A1193      -2.373  34.919 -23.501  1.00 15.28           C  
ATOM   2575  C   LEU A1193      -3.259  36.115 -23.835  1.00 14.70           C  
ATOM   2576  O   LEU A1193      -4.037  36.576 -22.994  1.00 15.53           O  
ATOM   2577  CB  LEU A1193      -3.208  33.648 -23.303  1.00 16.57           C  
ATOM   2578  CG  LEU A1193      -3.989  32.981 -24.440  1.00 20.01           C  
ATOM   2579  CD1 LEU A1193      -4.390  31.578 -24.019  1.00 21.95           C  
ATOM   2580  CD2 LEU A1193      -5.236  33.758 -24.839  1.00 27.13           C  
ATOM   2581  N   ALA A1194      -3.139  36.623 -25.059  1.00 14.29           N  
ATOM   2582  CA  ALA A1194      -3.884  37.812 -25.454  1.00 20.35           C  
ATOM   2583  C   ALA A1194      -3.950  37.880 -26.973  1.00 19.67           C  
ATOM   2584  O   ALA A1194      -3.298  37.107 -27.679  1.00 21.28           O  
ATOM   2585  CB  ALA A1194      -3.247  39.084 -24.882  1.00 22.37           C  
ATOM   2586  N   THR A1195      -4.746  38.825 -27.469  1.00 20.89           N  
ATOM   2587  CA  THR A1195      -4.856  39.048 -28.902  1.00 23.72           C  
ATOM   2588  C   THR A1195      -5.232  40.498 -29.164  1.00 29.84           C  
ATOM   2589  O   THR A1195      -5.753  41.197 -28.291  1.00 25.76           O  
ATOM   2590  CB  THR A1195      -5.897  38.127 -29.551  1.00 26.95           C  
ATOM   2591  OG1 THR A1195      -5.783  38.205 -30.978  1.00 31.07           O  
ATOM   2592  CG2 THR A1195      -7.301  38.545 -29.143  1.00 26.44           C  
ATOM   2593  N   ASN A1196      -4.947  40.944 -30.384  1.00 36.43           N  
ATOM   2594  CA  ASN A1196      -5.506  42.184 -30.916  1.00 35.64           C  
ATOM   2595  C   ASN A1196      -6.781  41.806 -31.659  1.00 35.20           C  
ATOM   2596  O   ASN A1196      -6.730  41.261 -32.764  1.00 36.63           O  
ATOM   2597  CB  ASN A1196      -4.504  42.884 -31.827  1.00 32.36           C  
ATOM   2598  CG  ASN A1196      -4.931  44.294 -32.196  1.00 40.81           C  
ATOM   2599  OD1 ASN A1196      -6.095  44.668 -32.047  1.00 41.69           O  
ATOM   2600  ND2 ASN A1196      -3.985  45.082 -32.693  1.00 42.96           N  
ATOM   2601  N   ALA A1197      -7.933  42.087 -31.051  1.00 33.85           N  
ATOM   2602  CA  ALA A1197      -9.210  41.721 -31.655  1.00 40.34           C  
ATOM   2603  C   ALA A1197      -9.520  42.510 -32.922  1.00 45.43           C  
ATOM   2604  O   ALA A1197     -10.540  42.235 -33.566  1.00 42.13           O  
ATOM   2605  CB  ALA A1197     -10.340  41.904 -30.640  1.00 37.76           C  
ATOM   2606  N   SER A1198      -8.677  43.467 -33.300  1.00 44.04           N  
ATOM   2607  CA  SER A1198      -8.898  44.276 -34.491  1.00 46.95           C  
ATOM   2608  C   SER A1198      -8.290  43.669 -35.748  1.00 47.01           C  
ATOM   2609  O   SER A1198      -8.384  44.279 -36.817  1.00 47.76           O  
ATOM   2610  CB  SER A1198      -8.337  45.686 -34.280  1.00 45.04           C  
ATOM   2611  OG  SER A1198      -8.961  46.319 -33.178  1.00 50.30           O  
ATOM   2612  N   GLN A1199      -7.670  42.496 -35.651  1.00 39.50           N  
ATOM   2613  CA  GLN A1199      -7.095  41.868 -36.831  1.00 45.28           C  
ATOM   2614  C   GLN A1199      -8.198  41.373 -37.761  1.00 45.70           C  
ATOM   2615  O   GLN A1199      -9.316  41.071 -37.334  1.00 43.12           O  
ATOM   2616  CB  GLN A1199      -6.172  40.716 -36.434  1.00 42.23           C  
ATOM   2617  CG  GLN A1199      -6.809  39.669 -35.538  1.00 37.15           C  
ATOM   2618  CD  GLN A1199      -5.822  38.599 -35.112  1.00 31.56           C  
ATOM   2619  OE1 GLN A1199      -5.591  37.628 -35.832  1.00 29.24           O  
ATOM   2620  NE2 GLN A1199      -5.223  38.781 -33.940  1.00 33.58           N  
ATOM   2621  N   ALA A1200      -7.870  41.297 -39.047  1.00 47.71           N  
ATOM   2622  CA  ALA A1200      -8.868  40.976 -40.058  1.00 45.35           C  
ATOM   2623  C   ALA A1200      -9.371  39.547 -39.890  1.00 48.87           C  
ATOM   2624  O   ALA A1200      -8.607  38.634 -39.567  1.00 51.41           O  
ATOM   2625  CB  ALA A1200      -8.284  41.172 -41.456  1.00 45.98           C  
ATOM   2626  N   GLY A1201     -10.667  39.357 -40.102  1.00 41.97           N  
ATOM   2627  CA  GLY A1201     -11.263  38.042 -40.003  1.00 44.15           C  
ATOM   2628  C   GLY A1201     -11.757  37.719 -38.602  1.00 42.32           C  
ATOM   2629  O   GLY A1201     -11.367  38.331 -37.609  1.00 42.75           O  
ATOM   2630  N   VAL A1202     -12.626  36.708 -38.537  1.00 39.48           N  
ATOM   2631  CA  VAL A1202     -13.310  36.355 -37.295  1.00 38.87           C  
ATOM   2632  C   VAL A1202     -12.407  35.556 -36.353  1.00 38.24           C  
ATOM   2633  O   VAL A1202     -12.555  35.643 -35.128  1.00 40.00           O  
ATOM   2634  CB  VAL A1202     -14.613  35.605 -37.636  1.00 43.64           C  
ATOM   2635  CG1 VAL A1202     -14.325  34.405 -38.525  1.00 40.25           C  
ATOM   2636  CG2 VAL A1202     -15.368  35.180 -36.377  1.00 39.23           C  
ATOM   2637  N   GLU A1203     -11.464  34.780 -36.888  1.00 35.99           N  
ATOM   2638  CA  GLU A1203     -10.506  34.043 -36.067  1.00 33.04           C  
ATOM   2639  C   GLU A1203      -9.378  34.977 -35.646  1.00 30.69           C  
ATOM   2640  O   GLU A1203      -8.553  35.380 -36.472  1.00 32.95           O  
ATOM   2641  CB  GLU A1203      -9.955  32.840 -36.826  1.00 34.03           C  
ATOM   2642  CG  GLU A1203     -10.941  31.699 -36.958  1.00 35.01           C  
ATOM   2643  CD  GLU A1203     -11.553  31.618 -38.337  1.00 42.79           C  
ATOM   2644  OE1 GLU A1203     -11.155  32.412 -39.218  1.00 46.27           O  
ATOM   2645  OE2 GLU A1203     -12.433  30.757 -38.537  1.00 45.59           O  
ATOM   2646  N   LYS A1204      -9.330  35.311 -34.360  1.00 28.93           N  
ATOM   2647  CA  LYS A1204      -8.299  36.188 -33.819  1.00 26.22           C  
ATOM   2648  C   LYS A1204      -7.143  35.324 -33.328  1.00 27.36           C  
ATOM   2649  O   LYS A1204      -7.295  34.555 -32.374  1.00 26.21           O  
ATOM   2650  CB  LYS A1204      -8.866  37.047 -32.693  1.00 27.83           C  
ATOM   2651  CG  LYS A1204     -10.253  37.608 -32.977  1.00 32.36           C  
ATOM   2652  CD  LYS A1204     -10.249  38.559 -34.161  1.00 34.15           C  
ATOM   2653  CE  LYS A1204     -11.627  39.169 -34.372  1.00 38.50           C  
ATOM   2654  NZ  LYS A1204     -11.698  40.022 -35.589  1.00 32.06           N  
ATOM   2655  N   ILE A1205      -5.989  35.443 -33.986  1.00 27.18           N  
ATOM   2656  CA  ILE A1205      -4.820  34.650 -33.618  1.00 23.53           C  
ATOM   2657  C   ILE A1205      -4.294  35.112 -32.266  1.00 24.02           C  
ATOM   2658  O   ILE A1205      -4.126  36.315 -32.024  1.00 25.22           O  
ATOM   2659  CB  ILE A1205      -3.738  34.756 -34.703  1.00 26.93           C  
ATOM   2660  CG1 ILE A1205      -4.223  34.110 -36.003  1.00 29.55           C  
ATOM   2661  CG2 ILE A1205      -2.437  34.119 -34.234  1.00 20.62           C  
ATOM   2662  CD1 ILE A1205      -3.447  34.541 -37.229  1.00 32.25           C  
ATOM   2663  N   LEU A1206      -4.016  34.155 -31.381  1.00 25.41           N  
ATOM   2664  CA  LEU A1206      -3.562  34.456 -30.029  1.00 20.40           C  
ATOM   2665  C   LEU A1206      -2.040  34.484 -29.964  1.00 23.22           C  
ATOM   2666  O   LEU A1206      -1.359  33.710 -30.642  1.00 24.94           O  
ATOM   2667  CB  LEU A1206      -4.099  33.429 -29.032  1.00 22.93           C  
ATOM   2668  CG  LEU A1206      -5.608  33.181 -29.012  1.00 22.49           C  
ATOM   2669  CD1 LEU A1206      -5.964  32.122 -27.974  1.00 23.72           C  
ATOM   2670  CD2 LEU A1206      -6.368  34.473 -28.759  1.00 26.78           C  
ATOM   2671  N   SER A1207      -1.515  35.379 -29.135  1.00 21.76           N  
ATOM   2672  CA  SER A1207      -0.087  35.505 -28.894  1.00 19.79           C  
ATOM   2673  C   SER A1207       0.195  35.325 -27.409  1.00 23.48           C  
ATOM   2674  O   SER A1207      -0.710  35.368 -26.571  1.00 21.10           O  
ATOM   2675  CB  SER A1207       0.439  36.868 -29.365  1.00 22.17           C  
ATOM   2676  OG  SER A1207       0.012  37.160 -30.682  1.00 28.55           O  
ATOM   2677  N   ALA A1208       1.471  35.123 -27.091  1.00 18.27           N  
ATOM   2678  CA  ALA A1208       1.950  35.070 -25.714  1.00 18.40           C  
ATOM   2679  C   ALA A1208       2.795  36.313 -25.466  1.00 19.90           C  
ATOM   2680  O   ALA A1208       3.927  36.408 -25.954  1.00 19.03           O  
ATOM   2681  CB  ALA A1208       2.755  33.799 -25.456  1.00 19.05           C  
ATOM   2682  N   LEU A1209       2.254  37.253 -24.699  1.00 17.65           N  
ATOM   2683  CA  LEU A1209       2.847  38.571 -24.531  1.00 21.24           C  
ATOM   2684  C   LEU A1209       3.482  38.710 -23.155  1.00 18.64           C  
ATOM   2685  O   LEU A1209       3.026  38.110 -22.178  1.00 18.10           O  
ATOM   2686  CB  LEU A1209       1.795  39.672 -24.701  1.00 20.14           C  
ATOM   2687  CG  LEU A1209       0.902  39.689 -25.942  1.00 20.43           C  
ATOM   2688  CD1 LEU A1209       0.045  40.944 -25.946  1.00 25.91           C  
ATOM   2689  CD2 LEU A1209       1.723  39.602 -27.205  1.00 25.63           C  
ATOM   2690  N   GLU A1210       4.539  39.518 -23.089  1.00 20.76           N  
ATOM   2691  CA  GLU A1210       5.010  40.002 -21.801  1.00 22.88           C  
ATOM   2692  C   GLU A1210       3.858  40.686 -21.079  1.00 20.09           C  
ATOM   2693  O   GLU A1210       3.129  41.486 -21.672  1.00 21.66           O  
ATOM   2694  CB  GLU A1210       6.177  40.975 -21.982  1.00 22.56           C  
ATOM   2695  CG  GLU A1210       7.443  40.345 -22.535  1.00 25.07           C  
ATOM   2696  CD  GLU A1210       8.239  39.596 -21.482  1.00 35.24           C  
ATOM   2697  OE1 GLU A1210       7.832  39.604 -20.300  1.00 34.79           O  
ATOM   2698  OE2 GLU A1210       9.279  39.002 -21.837  1.00 39.12           O  
ATOM   2699  N   ILE A1211       3.681  40.350 -19.807  1.00 22.05           N  
ATOM   2700  CA  ILE A1211       2.543  40.838 -19.027  1.00 19.65           C  
ATOM   2701  C   ILE A1211       2.487  42.364 -19.022  1.00 22.09           C  
ATOM   2702  O   ILE A1211       1.395  42.923 -19.207  1.00 25.13           O  
ATOM   2703  CB  ILE A1211       2.573  40.252 -17.605  1.00 21.94           C  
ATOM   2704  CG1 ILE A1211       2.468  38.727 -17.681  1.00 20.11           C  
ATOM   2705  CG2 ILE A1211       1.438  40.819 -16.765  1.00 26.90           C  
ATOM   2706  CD1 ILE A1211       2.863  38.012 -16.414  1.00 23.85           C  
ATOM   2707  N   PRO A1212       3.597  43.099 -18.844  1.00 21.59           N  
ATOM   2708  CA  PRO A1212       3.513  44.566 -18.970  1.00 24.79           C  
ATOM   2709  C   PRO A1212       3.230  45.050 -20.386  1.00 24.02           C  
ATOM   2710  O   PRO A1212       2.824  46.207 -20.553  1.00 26.78           O  
ATOM   2711  CB  PRO A1212       4.887  45.052 -18.480  1.00 25.52           C  
ATOM   2712  CG  PRO A1212       5.465  43.906 -17.721  1.00 23.94           C  
ATOM   2713  CD  PRO A1212       4.936  42.680 -18.385  1.00 26.70           C  
ATOM   2714  N   ASP A1213       3.420  44.212 -21.405  1.00 21.55           N  
ATOM   2715  CA  ASP A1213       3.229  44.627 -22.792  1.00 23.69           C  
ATOM   2716  C   ASP A1213       1.796  44.476 -23.289  1.00 26.42           C  
ATOM   2717  O   ASP A1213       1.535  44.782 -24.458  1.00 26.11           O  
ATOM   2718  CB  ASP A1213       4.151  43.826 -23.719  1.00 25.85           C  
ATOM   2719  CG  ASP A1213       5.566  44.366 -23.754  1.00 29.06           C  
ATOM   2720  OD1 ASP A1213       5.757  45.571 -23.503  1.00 31.89           O  
ATOM   2721  OD2 ASP A1213       6.493  43.583 -24.048  1.00 27.09           O  
ATOM   2722  N   VAL A1214       0.864  44.009 -22.456  1.00 24.22           N  
ATOM   2723  CA  VAL A1214      -0.482  43.734 -22.952  1.00 21.15           C  
ATOM   2724  C   VAL A1214      -1.226  45.033 -23.241  1.00 23.16           C  
ATOM   2725  O   VAL A1214      -1.950  45.140 -24.239  1.00 20.32           O  
ATOM   2726  CB  VAL A1214      -1.245  42.842 -21.955  1.00 21.05           C  
ATOM   2727  CG1 VAL A1214      -2.699  42.688 -22.378  1.00 23.89           C  
ATOM   2728  CG2 VAL A1214      -0.577  41.476 -21.853  1.00 19.49           C  
ATOM   2729  N   GLY A1215      -1.050  46.040 -22.392  1.00 19.61           N  
ATOM   2730  CA  GLY A1215      -1.759  47.293 -22.600  1.00 20.89           C  
ATOM   2731  C   GLY A1215      -3.254  47.080 -22.503  1.00 19.67           C  
ATOM   2732  O   GLY A1215      -3.758  46.474 -21.551  1.00 23.30           O  
ATOM   2733  N   ASN A1216      -3.983  47.569 -23.505  1.00 20.86           N  
ATOM   2734  CA  ASN A1216      -5.428  47.401 -23.563  1.00 18.65           C  
ATOM   2735  C   ASN A1216      -5.842  46.237 -24.458  1.00 21.31           C  
ATOM   2736  O   ASN A1216      -7.001  46.169 -24.881  1.00 23.32           O  
ATOM   2737  CB  ASN A1216      -6.096  48.695 -24.037  1.00 21.16           C  
ATOM   2738  CG  ASN A1216      -7.576  48.746 -23.693  1.00 24.41           C  
ATOM   2739  OD1 ASN A1216      -7.965  48.510 -22.550  1.00 21.76           O  
ATOM   2740  ND2 ASN A1216      -8.408  49.036 -24.688  1.00 20.34           N  
ATOM   2741  N   LEU A1217      -4.923  45.321 -24.755  1.00 21.58           N  
ATOM   2742  CA  LEU A1217      -5.263  44.200 -25.616  1.00 22.54           C  
ATOM   2743  C   LEU A1217      -6.176  43.221 -24.882  1.00 22.10           C  
ATOM   2744  O   LEU A1217      -6.202  43.153 -23.649  1.00 22.56           O  
ATOM   2745  CB  LEU A1217      -4.002  43.490 -26.111  1.00 23.35           C  
ATOM   2746  CG  LEU A1217      -3.166  44.322 -27.087  1.00 26.19           C  
ATOM   2747  CD1 LEU A1217      -1.956  43.544 -27.585  1.00 28.62           C  
ATOM   2748  CD2 LEU A1217      -4.026  44.804 -28.247  1.00 32.49           C  
ATOM   2749  N   SER A1218      -6.940  42.465 -25.667  1.00 20.59           N  
ATOM   2750  CA  SER A1218      -7.955  41.579 -25.115  1.00 19.56           C  
ATOM   2751  C   SER A1218      -7.302  40.371 -24.457  1.00 19.72           C  
ATOM   2752  O   SER A1218      -6.476  39.689 -25.070  1.00 17.95           O  
ATOM   2753  CB  SER A1218      -8.914  41.129 -26.215  1.00 23.28           C  
ATOM   2754  OG  SER A1218      -9.597  42.235 -26.778  1.00 27.82           O  
ATOM   2755  N   GLN A1219      -7.692  40.094 -23.213  1.00 19.37           N  
ATOM   2756  CA  GLN A1219      -7.039  39.049 -22.435  1.00 16.10           C  
ATOM   2757  C   GLN A1219      -7.974  38.432 -21.402  1.00 15.00           C  
ATOM   2758  O   GLN A1219      -7.653  37.395 -20.814  1.00 16.68           O  
ATOM   2759  CB  GLN A1219      -5.808  39.612 -21.729  1.00 16.70           C  
ATOM   2760  CG  GLN A1219      -6.121  40.839 -20.895  1.00 17.85           C  
ATOM   2761  CD  GLN A1219      -5.018  41.187 -19.922  1.00 19.82           C  
ATOM   2762  OE1 GLN A1219      -4.058  40.436 -19.761  1.00 20.35           O  
ATOM   2763  NE2 GLN A1219      -5.157  42.325 -19.254  1.00 21.12           N  
ATOM   2764  N   VAL A1220      -9.120  39.067 -21.155  1.00 15.63           N  
ATOM   2765  CA  VAL A1220     -10.065  38.528 -20.185  1.00 13.97           C  
ATOM   2766  C   VAL A1220     -10.721  37.281 -20.759  1.00 15.24           C  
ATOM   2767  O   VAL A1220     -11.290  37.309 -21.858  1.00 17.09           O  
ATOM   2768  CB  VAL A1220     -11.113  39.582 -19.802  1.00 13.77           C  
ATOM   2769  CG1 VAL A1220     -12.128  38.986 -18.843  1.00 18.45           C  
ATOM   2770  CG2 VAL A1220     -10.436  40.796 -19.187  1.00 17.65           C  
ATOM   2771  N   VAL A1221     -10.645  36.179 -20.018  1.00 14.71           N  
ATOM   2772  CA  VAL A1221     -11.205  34.901 -20.443  1.00 12.38           C  
ATOM   2773  C   VAL A1221     -12.282  34.498 -19.447  1.00 13.65           C  
ATOM   2774  O   VAL A1221     -12.051  34.519 -18.234  1.00 16.00           O  
ATOM   2775  CB  VAL A1221     -10.119  33.814 -20.549  1.00 13.12           C  
ATOM   2776  CG1 VAL A1221     -10.750  32.443 -20.769  1.00 15.89           C  
ATOM   2777  CG2 VAL A1221      -9.133  34.146 -21.665  1.00 14.09           C  
ATOM   2778  N   VAL A1222     -13.454  34.141 -19.959  1.00 16.34           N  
ATOM   2779  CA  VAL A1222     -14.542  33.624 -19.139  1.00 17.61           C  
ATOM   2780  C   VAL A1222     -14.479  32.105 -19.196  1.00 15.59           C  
ATOM   2781  O   VAL A1222     -14.586  31.516 -20.279  1.00 17.61           O  
ATOM   2782  CB  VAL A1222     -15.907  34.136 -19.623  1.00 18.78           C  
ATOM   2783  CG1 VAL A1222     -17.022  33.556 -18.766  1.00 20.79           C  
ATOM   2784  CG2 VAL A1222     -15.940  35.657 -19.610  1.00 19.59           C  
ATOM   2785  N   MET A1223     -14.304  31.472 -18.038  1.00 17.97           N  
ATOM   2786  CA  MET A1223     -14.225  30.020 -17.949  1.00 16.15           C  
ATOM   2787  C   MET A1223     -15.627  29.428 -17.875  1.00 16.61           C  
ATOM   2788  O   MET A1223     -16.500  29.958 -17.182  1.00 17.33           O  
ATOM   2789  CB  MET A1223     -13.411  29.598 -16.724  1.00 15.12           C  
ATOM   2790  CG  MET A1223     -12.013  30.200 -16.656  1.00 16.15           C  
ATOM   2791  SD  MET A1223     -10.942  29.688 -18.013  1.00 20.41           S  
ATOM   2792  CE  MET A1223     -10.817  27.920 -17.723  1.00 19.05           C  
ATOM   2793  N   LYS A1224     -15.841  28.325 -18.592  1.00 18.35           N  
ATOM   2794  CA  LYS A1224     -17.172  27.744 -18.735  1.00 19.05           C  
ATOM   2795  C   LYS A1224     -17.125  26.250 -18.457  1.00 19.94           C  
ATOM   2796  O   LYS A1224     -16.248  25.546 -18.970  1.00 22.28           O  
ATOM   2797  CB  LYS A1224     -17.736  27.988 -20.141  1.00 21.79           C  
ATOM   2798  CG  LYS A1224     -17.886  29.451 -20.514  1.00 23.79           C  
ATOM   2799  CD  LYS A1224     -18.901  30.165 -19.630  1.00 23.57           C  
ATOM   2800  CE  LYS A1224     -20.329  29.808 -20.011  1.00 26.45           C  
ATOM   2801  NZ  LYS A1224     -21.272  30.928 -19.724  1.00 34.69           N  
ATOM   2802  N   SER A1225     -18.071  25.773 -17.647  1.00 23.63           N  
ATOM   2803  CA  SER A1225     -18.314  24.348 -17.467  1.00 28.79           C  
ATOM   2804  C   SER A1225     -19.670  23.903 -17.986  1.00 30.84           C  
ATOM   2805  O   SER A1225     -19.818  22.744 -18.378  1.00 37.32           O  
ATOM   2806  CB  SER A1225     -18.207  23.964 -15.985  1.00 27.84           C  
ATOM   2807  OG  SER A1225     -19.268  24.526 -15.233  1.00 25.94           O  
ATOM   2808  N   LYS A1226     -20.656  24.796 -18.001  1.00 31.39           N  
ATOM   2809  CA  LYS A1226     -22.000  24.472 -18.468  1.00 38.58           C  
ATOM   2810  C   LYS A1226     -22.282  25.131 -19.813  1.00 39.77           C  
ATOM   2811  O   LYS A1226     -22.828  26.234 -19.872  1.00 44.10           O  
ATOM   2812  CB  LYS A1226     -23.044  24.911 -17.439  1.00 37.02           C  
ATOM   2813  CG  LYS A1226     -23.087  24.051 -16.187  1.00 36.06           C  
ATOM   2814  CD  LYS A1226     -24.035  24.639 -15.153  1.00 35.38           C  
ATOM   2815  CE  LYS A1226     -23.734  24.117 -13.758  1.00 32.12           C  
ATOM   2816  NZ  LYS A1226     -24.624  24.727 -12.732  1.00 40.58           N  
ATOM   2817  N   LYS A1234     -17.502  21.010 -23.457  1.00 34.64           N  
ATOM   2818  CA  LYS A1234     -16.138  20.978 -22.946  1.00 33.20           C  
ATOM   2819  C   LYS A1234     -15.339  22.193 -23.406  1.00 33.65           C  
ATOM   2820  O   LYS A1234     -14.163  22.334 -23.069  1.00 31.81           O  
ATOM   2821  CB  LYS A1234     -15.436  19.691 -23.385  1.00 34.43           C  
ATOM   2822  N   CYS A1235     -15.980  23.070 -24.175  1.00 32.08           N  
ATOM   2823  CA  CYS A1235     -15.340  24.306 -24.625  1.00 26.97           C  
ATOM   2824  C   CYS A1235     -15.278  25.272 -23.447  1.00 28.71           C  
ATOM   2825  O   CYS A1235     -16.278  25.886 -23.070  1.00 34.68           O  
ATOM   2826  CB  CYS A1235     -16.089  24.896 -25.817  1.00 32.07           C  
ATOM   2827  SG  CYS A1235     -15.869  23.937 -27.351  1.00 36.67           S  
ATOM   2828  N   LYS A1236     -14.084  25.417 -22.867  1.00 23.85           N  
ATOM   2829  CA  LYS A1236     -13.938  25.973 -21.528  1.00 25.66           C  
ATOM   2830  C   LYS A1236     -13.613  27.462 -21.471  1.00 17.68           C  
ATOM   2831  O   LYS A1236     -13.774  28.055 -20.401  1.00 22.93           O  
ATOM   2832  CB  LYS A1236     -12.836  25.229 -20.759  1.00 25.89           C  
ATOM   2833  CG  LYS A1236     -13.238  23.886 -20.166  1.00 27.72           C  
ATOM   2834  CD  LYS A1236     -12.229  23.454 -19.102  1.00 24.88           C  
ATOM   2835  CE  LYS A1236     -12.543  22.081 -18.530  1.00 26.72           C  
ATOM   2836  NZ  LYS A1236     -13.202  21.190 -19.520  1.00 32.52           N  
ATOM   2837  N   MET A1237     -13.141  28.084 -22.552  1.00 22.84           N  
ATOM   2838  CA  MET A1237     -12.521  29.406 -22.453  1.00 18.25           C  
ATOM   2839  C   MET A1237     -13.076  30.352 -23.507  1.00 17.44           C  
ATOM   2840  O   MET A1237     -12.864  30.138 -24.705  1.00 21.57           O  
ATOM   2841  CB  MET A1237     -11.000  29.301 -22.590  1.00 17.46           C  
ATOM   2842  CG  MET A1237     -10.344  28.458 -21.513  1.00 21.36           C  
ATOM   2843  SD  MET A1237      -8.551  28.479 -21.613  1.00 26.13           S  
ATOM   2844  CE  MET A1237      -8.256  27.305 -22.927  1.00 22.38           C  
ATOM   2845  N   ASN A1238     -13.740  31.422 -23.060  1.00 18.70           N  
ATOM   2846  CA  ASN A1238     -14.355  32.414 -23.943  1.00 17.76           C  
ATOM   2847  C   ASN A1238     -13.683  33.765 -23.726  1.00 19.96           C  
ATOM   2848  O   ASN A1238     -13.855  34.388 -22.672  1.00 18.19           O  
ATOM   2849  CB  ASN A1238     -15.859  32.523 -23.692  1.00 21.29           C  
ATOM   2850  CG  ASN A1238     -16.538  33.500 -24.636  1.00 26.63           C  
ATOM   2851  OD1 ASN A1238     -16.118  33.668 -25.782  1.00 29.90           O  
ATOM   2852  ND2 ASN A1238     -17.580  34.168 -24.151  1.00 30.98           N  
ATOM   2853  N   LEU A1239     -12.946  34.226 -24.732  1.00 18.01           N  
ATOM   2854  CA  LEU A1239     -12.203  35.474 -24.636  1.00 19.34           C  
ATOM   2855  C   LEU A1239     -13.133  36.664 -24.848  1.00 24.16           C  
ATOM   2856  O   LEU A1239     -13.995  36.646 -25.730  1.00 23.59           O  
ATOM   2857  CB  LEU A1239     -11.073  35.479 -25.669  1.00 21.37           C  
ATOM   2858  CG  LEU A1239     -10.091  36.643 -25.819  1.00 21.39           C  
ATOM   2859  CD1 LEU A1239      -9.382  36.924 -24.512  1.00 16.82           C  
ATOM   2860  CD2 LEU A1239      -9.071  36.307 -26.897  1.00 26.33           C  
ATOM   2861  N   GLN A1240     -12.960  37.699 -24.024  1.00 20.23           N  
ATOM   2862  CA  GLN A1240     -13.767  38.910 -24.100  1.00 21.45           C  
ATOM   2863  C   GLN A1240     -12.863  40.136 -24.124  1.00 22.75           C  
ATOM   2864  O   GLN A1240     -11.763  40.126 -23.566  1.00 21.25           O  
ATOM   2865  CB  GLN A1240     -14.747  39.015 -22.915  1.00 23.33           C  
ATOM   2866  CG  GLN A1240     -15.868  37.979 -22.925  1.00 29.00           C  
ATOM   2867  CD  GLN A1240     -16.937  38.263 -21.885  1.00 33.48           C  
ATOM   2868  OE1 GLN A1240     -16.687  38.941 -20.890  1.00 29.73           O  
ATOM   2869  NE2 GLN A1240     -18.139  37.744 -22.114  1.00 37.05           N  
ATOM   2870  N   ASP A1241     -13.332  41.200 -24.776  1.00 24.50           N  
ATOM   2871  CA  ASP A1241     -12.574  42.442 -24.760  1.00 23.20           C  
ATOM   2872  C   ASP A1241     -12.822  43.179 -23.445  1.00 25.24           C  
ATOM   2873  O   ASP A1241     -13.574  42.724 -22.578  1.00 23.33           O  
ATOM   2874  CB  ASP A1241     -12.907  43.306 -25.982  1.00 30.47           C  
ATOM   2875  CG  ASP A1241     -14.358  43.787 -26.018  1.00 31.86           C  
ATOM   2876  OD1 ASP A1241     -15.030  43.857 -24.969  1.00 33.02           O  
ATOM   2877  OD2 ASP A1241     -14.830  44.121 -27.125  1.00 33.31           O  
ATOM   2878  N   ASN A1242     -12.185  44.336 -23.288  1.00 24.40           N  
ATOM   2879  CA  ASN A1242     -12.348  45.107 -22.063  1.00 27.84           C  
ATOM   2880  C   ASN A1242     -13.638  45.917 -22.035  1.00 28.50           C  
ATOM   2881  O   ASN A1242     -13.907  46.586 -21.031  1.00 32.27           O  
ATOM   2882  CB  ASN A1242     -11.139  46.022 -21.854  1.00 25.36           C  
ATOM   2883  CG  ASN A1242      -9.900  45.249 -21.436  1.00 27.93           C  
ATOM   2884  OD1 ASN A1242      -9.995  44.107 -20.988  1.00 22.54           O  
ATOM   2885  ND2 ASN A1242      -8.735  45.870 -21.575  1.00 24.27           N  
ATOM   2886  N   ASN A1243     -14.440  45.871 -23.100  1.00 31.32           N  
ATOM   2887  CA  ASN A1243     -15.790  46.416 -23.077  1.00 33.59           C  
ATOM   2888  C   ASN A1243     -16.835  45.380 -22.687  1.00 37.32           C  
ATOM   2889  O   ASN A1243     -17.980  45.750 -22.410  1.00 36.06           O  
ATOM   2890  CB  ASN A1243     -16.155  47.006 -24.444  1.00 35.29           C  
ATOM   2891  CG  ASN A1243     -15.386  48.273 -24.758  1.00 38.27           C  
ATOM   2892  OD1 ASN A1243     -15.205  49.134 -23.897  1.00 38.05           O  
ATOM   2893  ND2 ASN A1243     -14.929  48.395 -25.999  1.00 40.92           N  
ATOM   2894  N   GLY A1244     -16.473  44.100 -22.661  1.00 29.05           N  
ATOM   2895  CA  GLY A1244     -17.393  43.041 -22.307  1.00 29.25           C  
ATOM   2896  C   GLY A1244     -17.948  42.253 -23.474  1.00 30.49           C  
ATOM   2897  O   GLY A1244     -18.738  41.329 -23.250  1.00 31.93           O  
ATOM   2898  N   ASN A1245     -17.564  42.583 -24.704  1.00 30.58           N  
ATOM   2899  CA  ASN A1245     -18.048  41.863 -25.872  1.00 32.94           C  
ATOM   2900  C   ASN A1245     -17.292  40.551 -26.042  1.00 28.75           C  
ATOM   2901  O   ASN A1245     -16.107  40.444 -25.711  1.00 27.54           O  
ATOM   2902  CB  ASN A1245     -17.888  42.713 -27.132  1.00 29.87           C  
ATOM   2903  CG  ASN A1245     -18.427  44.118 -26.963  1.00 37.89           C  
ATOM   2904  OD1 ASN A1245     -17.693  45.095 -27.108  1.00 39.14           O  
ATOM   2905  ND2 ASN A1245     -19.713  44.229 -26.656  1.00 39.53           N  
ATOM   2906  N   ASP A1246     -17.992  39.546 -26.565  1.00 29.18           N  
ATOM   2907  CA  ASP A1246     -17.359  38.266 -26.849  1.00 29.35           C  
ATOM   2908  C   ASP A1246     -16.430  38.386 -28.047  1.00 29.22           C  
ATOM   2909  O   ASP A1246     -16.794  38.951 -29.082  1.00 29.40           O  
ATOM   2910  CB  ASP A1246     -18.408  37.186 -27.128  1.00 33.45           C  
ATOM   2911  CG  ASP A1246     -19.063  36.661 -25.866  1.00 37.61           C  
ATOM   2912  OD1 ASP A1246     -18.519  36.898 -24.768  1.00 35.35           O  
ATOM   2913  OD2 ASP A1246     -20.115  35.992 -25.975  1.00 42.37           O  
ATOM   2914  N   ILE A1247     -15.220  37.850 -27.904  1.00 24.86           N  
ATOM   2915  CA  ILE A1247     -14.297  37.742 -29.027  1.00 26.14           C  
ATOM   2916  C   ILE A1247     -14.375  36.314 -29.549  1.00 26.38           C  
ATOM   2917  O   ILE A1247     -14.138  36.054 -30.734  1.00 26.77           O  
ATOM   2918  CB  ILE A1247     -12.861  38.127 -28.624  1.00 27.41           C  
ATOM   2919  CG1 ILE A1247     -12.833  39.548 -28.058  1.00 29.79           C  
ATOM   2920  CG2 ILE A1247     -11.920  38.032 -29.813  1.00 30.95           C  
ATOM   2921  CD1 ILE A1247     -13.620  40.553 -28.878  1.00 33.33           C  
ATOM   2922  N   GLY A1248     -14.722  35.380 -28.668  1.00 28.14           N  
ATOM   2923  CA  GLY A1248     -14.958  34.015 -29.087  1.00 26.30           C  
ATOM   2924  C   GLY A1248     -14.289  32.965 -28.227  1.00 24.20           C  
ATOM   2925  O   GLY A1248     -13.376  33.264 -27.450  1.00 21.16           O  
ATOM   2926  N   PHE A1249     -14.741  31.724 -28.362  1.00 24.91           N  
ATOM   2927  CA  PHE A1249     -14.127  30.629 -27.631  1.00 22.75           C  
ATOM   2928  C   PHE A1249     -12.741  30.331 -28.183  1.00 20.66           C  
ATOM   2929  O   PHE A1249     -12.472  30.483 -29.378  1.00 21.63           O  
ATOM   2930  CB  PHE A1249     -15.002  29.379 -27.698  1.00 24.70           C  
ATOM   2931  CG  PHE A1249     -16.100  29.363 -26.682  1.00 25.01           C  
ATOM   2932  CD1 PHE A1249     -15.867  28.889 -25.403  1.00 25.11           C  
ATOM   2933  CD2 PHE A1249     -17.359  29.839 -26.996  1.00 28.53           C  
ATOM   2934  CE1 PHE A1249     -16.875  28.879 -24.458  1.00 27.35           C  
ATOM   2935  CE2 PHE A1249     -18.373  29.835 -26.057  1.00 31.31           C  
ATOM   2936  CZ  PHE A1249     -18.131  29.353 -24.786  1.00 28.47           C  
ATOM   2937  N   ILE A1250     -11.855  29.899 -27.293  1.00 20.21           N  
ATOM   2938  CA  ILE A1250     -10.482  29.596 -27.674  1.00 20.74           C  
ATOM   2939  C   ILE A1250     -10.434  28.213 -28.307  1.00 22.43           C  
ATOM   2940  O   ILE A1250     -10.837  27.218 -27.691  1.00 21.81           O  
ATOM   2941  CB  ILE A1250      -9.537  29.696 -26.470  1.00 19.54           C  
ATOM   2942  CG1 ILE A1250      -9.528  31.133 -25.941  1.00 24.03           C  
ATOM   2943  CG2 ILE A1250      -8.139  29.242 -26.852  1.00 21.40           C  
ATOM   2944  CD1 ILE A1250      -8.471  31.403 -24.901  1.00 26.59           C  
ATOM   2945  N   GLY A1251      -9.963  28.152 -29.545  1.00 20.43           N  
ATOM   2946  CA  GLY A1251      -9.783  26.895 -30.255  1.00 20.34           C  
ATOM   2947  C   GLY A1251      -8.606  27.015 -31.181  1.00 23.25           C  
ATOM   2948  O   GLY A1251      -7.578  27.596 -30.807  1.00 25.20           O  
ATOM   2949  N   PHE A1252      -8.741  26.495 -32.397  1.00 23.46           N  
ATOM   2950  CA  PHE A1252      -7.652  26.594 -33.355  1.00 25.78           C  
ATOM   2951  C   PHE A1252      -8.218  26.644 -34.765  1.00 27.98           C  
ATOM   2952  O   PHE A1252      -9.371  26.275 -35.007  1.00 27.34           O  
ATOM   2953  CB  PHE A1252      -6.662  25.431 -33.210  1.00 26.29           C  
ATOM   2954  CG  PHE A1252      -7.200  24.110 -33.686  1.00 27.01           C  
ATOM   2955  CD1 PHE A1252      -7.879  23.271 -32.817  1.00 29.45           C  
ATOM   2956  CD2 PHE A1252      -7.022  23.702 -35.000  1.00 26.75           C  
ATOM   2957  CE1 PHE A1252      -8.375  22.053 -33.251  1.00 30.75           C  
ATOM   2958  CE2 PHE A1252      -7.517  22.487 -35.440  1.00 33.66           C  
ATOM   2959  CZ  PHE A1252      -8.194  21.661 -34.564  1.00 32.93           C  
ATOM   2960  N   HIS A1253      -7.380  27.091 -35.698  1.00 26.65           N  
ATOM   2961  CA  HIS A1253      -7.768  27.206 -37.095  1.00 30.86           C  
ATOM   2962  C   HIS A1253      -6.550  26.975 -37.975  1.00 34.45           C  
ATOM   2963  O   HIS A1253      -5.434  27.359 -37.615  1.00 32.05           O  
ATOM   2964  CB  HIS A1253      -8.379  28.578 -37.398  1.00 32.04           C  
ATOM   2965  CG  HIS A1253      -8.945  28.691 -38.778  1.00 35.12           C  
ATOM   2966  ND1 HIS A1253     -10.130  28.091 -39.147  1.00 32.82           N  
ATOM   2967  CD2 HIS A1253      -8.483  29.322 -39.884  1.00 35.96           C  
ATOM   2968  CE1 HIS A1253     -10.378  28.354 -40.418  1.00 39.33           C  
ATOM   2969  NE2 HIS A1253      -9.394  29.099 -40.888  1.00 41.50           N  
ATOM   2970  N   GLN A1254      -6.775  26.353 -39.130  1.00 36.06           N  
ATOM   2971  CA  GLN A1254      -5.699  26.061 -40.070  1.00 34.97           C  
ATOM   2972  C   GLN A1254      -5.394  27.295 -40.911  1.00 37.03           C  
ATOM   2973  O   GLN A1254      -6.268  27.802 -41.623  1.00 35.27           O  
ATOM   2974  CB  GLN A1254      -6.082  24.884 -40.966  1.00 38.73           C  
ATOM   2975  CG  GLN A1254      -6.243  23.557 -40.240  1.00 41.40           C  
ATOM   2976  CD  GLN A1254      -4.915  22.966 -39.813  1.00 39.60           C  
ATOM   2977  OE1 GLN A1254      -3.857  23.401 -40.266  1.00 43.95           O  
ATOM   2978  NE2 GLN A1254      -4.964  21.967 -38.938  1.00 37.99           N  
ATOM   2979  N   PHE A1255      -4.154  27.773 -40.832  1.00 38.55           N  
ATOM   2980  CA  PHE A1255      -3.658  28.869 -41.663  1.00 38.80           C  
ATOM   2981  C   PHE A1255      -2.475  28.331 -42.460  1.00 41.83           C  
ATOM   2982  O   PHE A1255      -1.344  28.315 -41.962  1.00 46.27           O  
ATOM   2983  CB  PHE A1255      -3.250  30.074 -40.821  1.00 34.88           C  
ATOM   2984  CG  PHE A1255      -4.385  30.702 -40.068  1.00 37.78           C  
ATOM   2985  CD1 PHE A1255      -5.182  31.665 -40.664  1.00 37.86           C  
ATOM   2986  CD2 PHE A1255      -4.646  30.339 -38.758  1.00 33.67           C  
ATOM   2987  CE1 PHE A1255      -6.226  32.248 -39.968  1.00 35.71           C  
ATOM   2988  CE2 PHE A1255      -5.685  30.918 -38.058  1.00 33.20           C  
ATOM   2989  CZ  PHE A1255      -6.477  31.873 -38.663  1.00 36.39           C  
ATOM   2990  N   ASN A1256      -2.760  27.909 -43.666  1.00 48.47           N  
ATOM   2991  CA  ASN A1256      -1.730  27.313 -44.458  1.00 48.16           C  
ATOM   2992  C   ASN A1256      -1.015  26.157 -43.809  1.00 43.96           C  
ATOM   2993  O   ASN A1256       0.181  26.123 -43.715  1.00 49.94           O  
ATOM   2994  CB  ASN A1256      -0.827  28.374 -45.058  1.00 30.00           C  
ATOM   2995  CG  ASN A1256      -1.498  29.073 -46.214  1.00 30.00           C  
ATOM   2996  OD1 ASN A1256      -2.698  28.938 -46.379  1.00 30.00           O  
ATOM   2997  ND2 ASN A1256      -0.747  29.817 -47.011  1.00 30.00           N  
ATOM   2998  N   ASN A1257      -1.801  25.198 -43.388  1.00 44.98           N  
ATOM   2999  CA  ASN A1257      -1.308  23.966 -42.770  1.00 44.54           C  
ATOM   3000  C   ASN A1257      -0.531  24.234 -41.482  1.00 42.20           C  
ATOM   3001  O   ASN A1257       0.380  23.483 -41.124  1.00 46.56           O  
ATOM   3002  CB  ASN A1257      -0.466  23.155 -43.759  1.00 50.68           C  
ATOM   3003  CG  ASN A1257      -1.077  23.123 -45.146  1.00 56.00           C  
ATOM   3004  OD1 ASN A1257      -2.287  23.288 -45.306  1.00 54.63           O  
ATOM   3005  ND2 ASN A1257      -0.243  22.913 -46.158  1.00 50.13           N  
ATOM   3006  N   ILE A1258      -0.889  25.308 -40.780  1.00 40.19           N  
ATOM   3007  CA  ILE A1258      -0.416  25.575 -39.426  1.00 37.79           C  
ATOM   3008  C   ILE A1258      -1.646  25.790 -38.556  1.00 36.45           C  
ATOM   3009  O   ILE A1258      -2.442  26.699 -38.819  1.00 31.73           O  
ATOM   3010  CB  ILE A1258       0.515  26.797 -39.354  1.00 37.62           C  
ATOM   3011  CG1 ILE A1258       1.791  26.560 -40.166  1.00 43.04           C  
ATOM   3012  CG2 ILE A1258       0.859  27.112 -37.907  1.00 34.04           C  
ATOM   3013  CD1 ILE A1258       2.803  27.685 -40.053  1.00 41.56           C  
ATOM   3014  N   ALA A1259      -1.805  24.957 -37.530  1.00 32.23           N  
ATOM   3015  CA  ALA A1259      -2.976  25.023 -36.655  1.00 32.68           C  
ATOM   3016  C   ALA A1259      -2.685  26.013 -35.536  1.00 29.01           C  
ATOM   3017  O   ALA A1259      -2.196  25.648 -34.468  1.00 30.30           O  
ATOM   3018  CB  ALA A1259      -3.324  23.642 -36.112  1.00 30.10           C  
ATOM   3019  N   LYS A1260      -2.998  27.282 -35.782  1.00 23.24           N  
ATOM   3020  CA  LYS A1260      -2.785  28.343 -34.809  1.00 25.72           C  
ATOM   3021  C   LYS A1260      -3.960  28.435 -33.841  1.00 23.17           C  
ATOM   3022  O   LYS A1260      -5.117  28.245 -34.223  1.00 23.26           O  
ATOM   3023  CB  LYS A1260      -2.604  29.688 -35.514  1.00 26.70           C  
ATOM   3024  CG  LYS A1260      -1.513  29.710 -36.570  1.00 26.74           C  
ATOM   3025  CD  LYS A1260      -1.315  31.119 -37.111  1.00 28.44           C  
ATOM   3026  CE  LYS A1260      -0.165  31.183 -38.103  1.00 27.98           C  
ATOM   3027  NZ  LYS A1260       0.067  32.575 -38.583  1.00 34.56           N  
ATOM   3028  N   LEU A1261      -3.654  28.741 -32.580  1.00 21.15           N  
ATOM   3029  CA  LEU A1261      -4.711  28.966 -31.600  1.00 23.21           C  
ATOM   3030  C   LEU A1261      -5.434  30.275 -31.892  1.00 22.79           C  
ATOM   3031  O   LEU A1261      -4.810  31.293 -32.207  1.00 20.32           O  
ATOM   3032  CB  LEU A1261      -4.154  29.001 -30.177  1.00 24.66           C  
ATOM   3033  CG  LEU A1261      -3.393  27.803 -29.609  1.00 28.16           C  
ATOM   3034  CD1 LEU A1261      -3.332  27.904 -28.087  1.00 28.40           C  
ATOM   3035  CD2 LEU A1261      -4.011  26.482 -30.045  1.00 26.04           C  
ATOM   3036  N   VAL A1262      -6.760  30.246 -31.776  1.00 22.57           N  
ATOM   3037  CA  VAL A1262      -7.594  31.390 -32.116  1.00 22.85           C  
ATOM   3038  C   VAL A1262      -8.700  31.548 -31.085  1.00 22.69           C  
ATOM   3039  O   VAL A1262      -9.110  30.589 -30.424  1.00 21.55           O  
ATOM   3040  CB  VAL A1262      -8.220  31.263 -33.526  1.00 23.69           C  
ATOM   3041  CG1 VAL A1262      -7.147  31.127 -34.592  1.00 25.97           C  
ATOM   3042  CG2 VAL A1262      -9.194  30.090 -33.580  1.00 24.59           C  
ATOM   3043  N   ALA A1263      -9.169  32.781 -30.945  1.00 21.06           N  
ATOM   3044  CA  ALA A1263     -10.498  33.059 -30.429  1.00 21.08           C  
ATOM   3045  C   ALA A1263     -11.411  33.278 -31.625  1.00 24.11           C  
ATOM   3046  O   ALA A1263     -11.036  33.961 -32.581  1.00 27.73           O  
ATOM   3047  CB  ALA A1263     -10.507  34.288 -29.520  1.00 22.28           C  
ATOM   3048  N   SER A1264     -12.596  32.677 -31.585  1.00 25.53           N  
ATOM   3049  CA  SER A1264     -13.474  32.698 -32.750  1.00 29.47           C  
ATOM   3050  C   SER A1264     -14.919  32.578 -32.299  1.00 29.79           C  
ATOM   3051  O   SER A1264     -15.275  31.628 -31.596  1.00 30.13           O  
ATOM   3052  CB  SER A1264     -13.114  31.568 -33.717  1.00 27.64           C  
ATOM   3053  OG  SER A1264     -14.094  31.431 -34.733  1.00 34.95           O  
ATOM   3054  N   ASN A1265     -15.751  33.537 -32.712  1.00 29.05           N  
ATOM   3055  CA  ASN A1265     -17.176  33.479 -32.414  1.00 31.68           C  
ATOM   3056  C   ASN A1265     -17.907  32.409 -33.217  1.00 31.53           C  
ATOM   3057  O   ASN A1265     -19.087  32.163 -32.945  1.00 34.71           O  
ATOM   3058  CB  ASN A1265     -17.814  34.849 -32.653  1.00 28.54           C  
ATOM   3059  CG  ASN A1265     -17.523  35.826 -31.531  1.00 36.37           C  
ATOM   3060  OD1 ASN A1265     -17.539  35.458 -30.356  1.00 35.83           O  
ATOM   3061  ND2 ASN A1265     -17.238  37.074 -31.886  1.00 38.04           N  
ATOM   3062  N   TRP A1266     -17.243  31.775 -34.193  1.00 32.36           N  
ATOM   3063  CA  TRP A1266     -17.835  30.620 -34.863  1.00 32.85           C  
ATOM   3064  C   TRP A1266     -18.192  29.528 -33.867  1.00 38.01           C  
ATOM   3065  O   TRP A1266     -19.215  28.851 -34.027  1.00 32.22           O  
ATOM   3066  CB  TRP A1266     -16.878  30.066 -35.923  1.00 38.89           C  
ATOM   3067  CG  TRP A1266     -17.511  29.034 -36.831  1.00 46.82           C  
ATOM   3068  CD1 TRP A1266     -18.392  29.272 -37.837  1.00 42.69           C  
ATOM   3069  CD2 TRP A1266     -17.306  27.613 -36.812  1.00 46.36           C  
ATOM   3070  NE1 TRP A1266     -18.759  28.091 -38.452  1.00 46.35           N  
ATOM   3071  CE2 TRP A1266     -18.102  27.056 -37.838  1.00 45.96           C  
ATOM   3072  CE3 TRP A1266     -16.529  26.752 -36.027  1.00 41.16           C  
ATOM   3073  CZ2 TRP A1266     -18.146  25.696 -38.103  1.00 43.72           C  
ATOM   3074  CZ3 TRP A1266     -16.573  25.391 -36.291  1.00 46.00           C  
ATOM   3075  CH2 TRP A1266     -17.377  24.879 -37.321  1.00 44.47           C  
ATOM   3076  N   TYR A1267     -17.365  29.348 -32.833  1.00 35.43           N  
ATOM   3077  CA  TYR A1267     -17.626  28.323 -31.827  1.00 37.37           C  
ATOM   3078  C   TYR A1267     -18.861  28.656 -31.005  1.00 36.47           C  
ATOM   3079  O   TYR A1267     -19.726  27.799 -30.794  1.00 33.97           O  
ATOM   3080  CB  TYR A1267     -16.423  28.164 -30.900  1.00 31.09           C  
ATOM   3081  CG  TYR A1267     -15.177  27.639 -31.559  1.00 32.06           C  
ATOM   3082  CD1 TYR A1267     -15.164  26.395 -32.174  1.00 32.38           C  
ATOM   3083  CD2 TYR A1267     -14.004  28.379 -31.546  1.00 25.03           C  
ATOM   3084  CE1 TYR A1267     -14.022  25.912 -32.771  1.00 29.54           C  
ATOM   3085  CE2 TYR A1267     -12.857  27.903 -32.139  1.00 29.42           C  
ATOM   3086  CZ  TYR A1267     -12.871  26.670 -32.751  1.00 30.72           C  
ATOM   3087  OH  TYR A1267     -11.731  26.189 -33.345  1.00 29.93           O  
ATOM   3088  N   ASN A1268     -18.942  29.895 -30.508  1.00 33.73           N  
ATOM   3089  CA  ASN A1268     -20.084  30.305 -29.695  1.00 35.72           C  
ATOM   3090  C   ASN A1268     -21.401  29.982 -30.382  1.00 40.42           C  
ATOM   3091  O   ASN A1268     -22.377  29.606 -29.722  1.00 43.97           O  
ATOM   3092  CB  ASN A1268     -20.001  31.799 -29.392  1.00 31.39           C  
ATOM   3093  CG  ASN A1268     -18.656  32.200 -28.840  1.00 38.09           C  
ATOM   3094  OD1 ASN A1268     -17.635  32.057 -29.511  1.00 35.19           O  
ATOM   3095  ND2 ASN A1268     -18.642  32.703 -27.612  1.00 29.77           N  
ATOM   3096  N   ARG A1269     -21.455  30.124 -31.709  1.00 42.38           N  
ATOM   3097  CA  ARG A1269     -22.678  29.757 -32.411  1.00 41.22           C  
ATOM   3098  C   ARG A1269     -22.742  28.247 -32.629  1.00 44.88           C  
ATOM   3099  O   ARG A1269     -23.817  27.646 -32.512  1.00 43.96           O  
ATOM   3100  CB  ARG A1269     -22.784  30.534 -33.729  1.00 44.51           C  
ATOM   3101  CG  ARG A1269     -24.120  30.326 -34.436  1.00 52.96           C  
ATOM   3102  CD  ARG A1269     -24.227  28.898 -35.011  1.00 51.70           C  
ATOM   3103  NE  ARG A1269     -25.513  28.556 -35.640  1.00 53.30           N  
ATOM   3104  CZ  ARG A1269     -26.071  29.195 -36.677  1.00 58.39           C  
ATOM   3105  NH1 ARG A1269     -27.236  28.790 -37.177  1.00 56.17           N  
ATOM   3106  NH2 ARG A1269     -25.527  30.292 -37.185  1.00 56.99           N  
ATOM   3107  N   GLN A1270     -21.600  27.612 -32.876  1.00 42.93           N  
ATOM   3108  CA  GLN A1270     -21.552  26.161 -33.026  1.00 45.21           C  
ATOM   3109  C   GLN A1270     -21.812  25.490 -31.685  1.00 37.79           C  
ATOM   3110  O   GLN A1270     -22.923  25.035 -31.419  1.00 48.42           O  
ATOM   3111  CB  GLN A1270     -20.202  25.710 -33.591  1.00 45.06           C  
ATOM   3112  N   THR A1277     -17.878  17.279 -29.763  1.00 36.51           N  
ATOM   3113  CA  THR A1277     -16.465  17.634 -29.704  1.00 34.54           C  
ATOM   3114  C   THR A1277     -16.116  18.665 -30.773  1.00 36.01           C  
ATOM   3115  O   THR A1277     -16.230  18.399 -31.970  1.00 35.42           O  
ATOM   3116  CB  THR A1277     -15.561  16.396 -29.877  1.00 37.23           C  
ATOM   3117  OG1 THR A1277     -15.759  15.496 -28.779  1.00 38.03           O  
ATOM   3118  CG2 THR A1277     -14.098  16.808 -29.931  1.00 37.74           C  
ATOM   3119  N   LEU A1278     -15.696  19.845 -30.330  1.00 33.02           N  
ATOM   3120  CA  LEU A1278     -15.318  20.936 -31.213  1.00 27.89           C  
ATOM   3121  C   LEU A1278     -13.843  21.261 -31.024  1.00 31.60           C  
ATOM   3122  O   LEU A1278     -13.182  20.762 -30.109  1.00 26.88           O  
ATOM   3123  CB  LEU A1278     -16.165  22.188 -30.947  1.00 28.42           C  
ATOM   3124  CG  LEU A1278     -17.678  22.101 -31.150  1.00 34.98           C  
ATOM   3125  CD1 LEU A1278     -18.310  23.475 -30.970  1.00 33.02           C  
ATOM   3126  CD2 LEU A1278     -18.020  21.523 -32.515  1.00 36.41           C  
ATOM   3127  N   GLY A1279     -13.335  22.123 -31.904  1.00 33.86           N  
ATOM   3128  CA  GLY A1279     -11.974  22.609 -31.774  1.00 34.48           C  
ATOM   3129  C   GLY A1279     -11.724  23.449 -30.541  1.00 27.58           C  
ATOM   3130  O   GLY A1279     -10.561  23.734 -30.234  1.00 28.50           O  
ATOM   3131  N   CYS A1280     -12.776  23.854 -29.830  1.00 24.33           N  
ATOM   3132  CA  CYS A1280     -12.624  24.619 -28.601  1.00 27.54           C  
ATOM   3133  C   CYS A1280     -12.701  23.751 -27.354  1.00 27.19           C  
ATOM   3134  O   CYS A1280     -12.733  24.287 -26.243  1.00 27.94           O  
ATOM   3135  CB  CYS A1280     -13.668  25.743 -28.526  1.00 28.41           C  
ATOM   3136  SG  CYS A1280     -15.423  25.318 -28.774  1.00 28.40           S  
ATOM   3137  N   SER A1281     -12.736  22.430 -27.507  1.00 24.29           N  
ATOM   3138  CA  SER A1281     -12.831  21.517 -26.374  1.00 25.38           C  
ATOM   3139  C   SER A1281     -11.432  21.233 -25.836  1.00 24.01           C  
ATOM   3140  O   SER A1281     -10.592  20.672 -26.550  1.00 20.40           O  
ATOM   3141  CB  SER A1281     -13.527  20.221 -26.789  1.00 31.51           C  
ATOM   3142  OG  SER A1281     -14.738  20.487 -27.477  1.00 30.22           O  
ATOM   3143  N   TRP A1282     -11.183  21.615 -24.582  1.00 21.26           N  
ATOM   3144  CA  TRP A1282      -9.875  21.472 -23.956  1.00 22.17           C  
ATOM   3145  C   TRP A1282      -9.979  20.689 -22.656  1.00 21.50           C  
ATOM   3146  O   TRP A1282     -10.992  20.748 -21.954  1.00 22.42           O  
ATOM   3147  CB  TRP A1282      -9.234  22.828 -23.628  1.00 19.92           C  
ATOM   3148  CG  TRP A1282      -8.954  23.708 -24.794  1.00 22.27           C  
ATOM   3149  CD1 TRP A1282      -9.745  24.716 -25.261  1.00 21.29           C  
ATOM   3150  CD2 TRP A1282      -7.787  23.693 -25.624  1.00 22.06           C  
ATOM   3151  NE1 TRP A1282      -9.149  25.321 -26.341  1.00 21.93           N  
ATOM   3152  CE2 TRP A1282      -7.946  24.711 -26.584  1.00 24.29           C  
ATOM   3153  CE3 TRP A1282      -6.627  22.912 -25.655  1.00 24.18           C  
ATOM   3154  CZ2 TRP A1282      -6.989  24.970 -27.566  1.00 24.46           C  
ATOM   3155  CZ3 TRP A1282      -5.677  23.171 -26.629  1.00 23.75           C  
ATOM   3156  CH2 TRP A1282      -5.864  24.190 -27.571  1.00 23.85           C  
ATOM   3157  N   GLU A1283      -8.903  19.974 -22.331  1.00 17.95           N  
ATOM   3158  CA  GLU A1283      -8.696  19.402 -21.010  1.00 17.53           C  
ATOM   3159  C   GLU A1283      -7.422  19.990 -20.410  1.00 17.59           C  
ATOM   3160  O   GLU A1283      -6.446  20.250 -21.120  1.00 16.06           O  
ATOM   3161  CB  GLU A1283      -8.598  17.866 -21.062  1.00 20.65           C  
ATOM   3162  CG  GLU A1283      -9.845  17.172 -21.604  1.00 21.36           C  
ATOM   3163  CD  GLU A1283     -10.864  16.855 -20.521  1.00 32.76           C  
ATOM   3164  OE1 GLU A1283     -10.667  17.285 -19.363  1.00 32.53           O  
ATOM   3165  OE2 GLU A1283     -11.867  16.174 -20.825  1.00 32.60           O  
ATOM   3166  N   PHE A1284      -7.451  20.218 -19.097  1.00 15.69           N  
ATOM   3167  CA  PHE A1284      -6.311  20.732 -18.341  1.00 12.85           C  
ATOM   3168  C   PHE A1284      -5.699  19.581 -17.550  1.00 12.19           C  
ATOM   3169  O   PHE A1284      -6.367  19.005 -16.688  1.00 13.53           O  
ATOM   3170  CB  PHE A1284      -6.740  21.845 -17.382  1.00 13.35           C  
ATOM   3171  CG  PHE A1284      -7.189  23.113 -18.059  1.00 15.23           C  
ATOM   3172  CD1 PHE A1284      -8.457  23.211 -18.613  1.00 20.40           C  
ATOM   3173  CD2 PHE A1284      -6.357  24.220 -18.104  1.00 18.75           C  
ATOM   3174  CE1 PHE A1284      -8.874  24.385 -19.225  1.00 20.26           C  
ATOM   3175  CE2 PHE A1284      -6.770  25.396 -18.712  1.00 18.51           C  
ATOM   3176  CZ  PHE A1284      -8.028  25.478 -19.272  1.00 15.78           C  
ATOM   3177  N   ILE A1285      -4.429  19.276 -17.810  1.00 12.83           N  
ATOM   3178  CA  ILE A1285      -3.774  18.088 -17.271  1.00 13.47           C  
ATOM   3179  C   ILE A1285      -2.639  18.538 -16.352  1.00 13.70           C  
ATOM   3180  O   ILE A1285      -1.576  18.938 -16.844  1.00 13.86           O  
ATOM   3181  CB  ILE A1285      -3.241  17.177 -18.382  1.00 14.54           C  
ATOM   3182  CG1 ILE A1285      -4.339  16.875 -19.404  1.00 17.18           C  
ATOM   3183  CG2 ILE A1285      -2.677  15.899 -17.785  1.00 16.14           C  
ATOM   3184  CD1 ILE A1285      -3.864  16.078 -20.592  1.00 20.55           C  
ATOM   3185  N   PRO A1286      -2.787  18.439 -15.036  1.00 13.36           N  
ATOM   3186  CA  PRO A1286      -1.644  18.644 -14.146  1.00 14.39           C  
ATOM   3187  C   PRO A1286      -0.878  17.346 -13.922  1.00 14.11           C  
ATOM   3188  O   PRO A1286      -1.396  16.241 -14.107  1.00 13.75           O  
ATOM   3189  CB  PRO A1286      -2.310  19.116 -12.850  1.00 13.18           C  
ATOM   3190  CG  PRO A1286      -3.590  18.328 -12.829  1.00 13.57           C  
ATOM   3191  CD  PRO A1286      -4.034  18.212 -14.278  1.00 14.80           C  
ATOM   3192  N   VAL A1287       0.384  17.499 -13.516  1.00 12.32           N  
ATOM   3193  CA  VAL A1287       1.177  16.333 -13.147  1.00 14.28           C  
ATOM   3194  C   VAL A1287       0.522  15.652 -11.957  1.00 17.86           C  
ATOM   3195  O   VAL A1287       0.159  16.306 -10.970  1.00 19.32           O  
ATOM   3196  CB  VAL A1287       2.626  16.736 -12.839  1.00 13.99           C  
ATOM   3197  CG1 VAL A1287       3.403  15.543 -12.281  1.00 17.25           C  
ATOM   3198  CG2 VAL A1287       3.298  17.289 -14.089  1.00 17.62           C  
ATOM   3199  N   ASP A1288       0.355  14.336 -12.047  1.00 12.29           N  
ATOM   3200  CA  ASP A1288      -0.346  13.575 -11.024  1.00 17.72           C  
ATOM   3201  C   ASP A1288       0.400  12.276 -10.767  1.00 17.90           C  
ATOM   3202  O   ASP A1288       0.865  11.622 -11.706  1.00 16.47           O  
ATOM   3203  CB  ASP A1288      -1.793  13.273 -11.439  1.00 15.45           C  
ATOM   3204  CG  ASP A1288      -2.591  12.602 -10.333  1.00 16.24           C  
ATOM   3205  OD1 ASP A1288      -3.171  13.326  -9.497  1.00 19.24           O  
ATOM   3206  OD2 ASP A1288      -2.639  11.353 -10.298  1.00 19.67           O  
ATOM   3207  N   ASP A1289       0.498  11.900  -9.490  1.00 18.19           N  
ATOM   3208  CA  ASP A1289       1.263  10.715  -9.113  1.00 19.52           C  
ATOM   3209  C   ASP A1289       0.646   9.428  -9.643  1.00 20.26           C  
ATOM   3210  O   ASP A1289       1.363   8.435  -9.813  1.00 19.55           O  
ATOM   3211  CB  ASP A1289       1.394  10.637  -7.591  1.00 19.66           C  
ATOM   3212  CG  ASP A1289       2.403  11.629  -7.041  1.00 33.09           C  
ATOM   3213  OD1 ASP A1289       3.302  12.043  -7.801  1.00 36.83           O  
ATOM   3214  OD2 ASP A1289       2.298  11.994  -5.852  1.00 37.46           O  
ATOM   3215  N   GLY A1290      -0.657   9.418  -9.900  1.00 16.08           N  
ATOM   3216  CA  GLY A1290      -1.318   8.247 -10.426  1.00 17.08           C  
ATOM   3217  C   GLY A1290      -1.110   7.995 -11.896  1.00 16.65           C  
ATOM   3218  O   GLY A1290      -1.620   7.004 -12.424  1.00 18.17           O  
ATOM   3219  N   TRP A1291      -0.381   8.869 -12.584  1.00 15.67           N  
ATOM   3220  CA  TRP A1291      -0.112   8.701 -14.006  1.00 16.19           C  
ATOM   3221  C   TRP A1291       1.333   8.324 -14.291  1.00 23.53           C  
ATOM   3222  O   TRP A1291       1.585   7.499 -15.173  1.00 23.37           O  
ATOM   3223  CB  TRP A1291      -0.493   9.974 -14.773  1.00 16.68           C  
ATOM   3224  CG  TRP A1291      -0.262   9.879 -16.251  1.00 17.53           C  
ATOM   3225  CD1 TRP A1291       0.708  10.514 -16.972  1.00 19.64           C  
ATOM   3226  CD2 TRP A1291      -1.003   9.088 -17.187  1.00 14.07           C  
ATOM   3227  NE1 TRP A1291       0.610  10.173 -18.303  1.00 15.68           N  
ATOM   3228  CE2 TRP A1291      -0.432   9.298 -18.458  1.00 15.28           C  
ATOM   3229  CE3 TRP A1291      -2.098   8.226 -17.074  1.00 16.81           C  
ATOM   3230  CZ2 TRP A1291      -0.918   8.677 -19.605  1.00 15.76           C  
ATOM   3231  CZ3 TRP A1291      -2.577   7.609 -18.213  1.00 15.37           C  
ATOM   3232  CH2 TRP A1291      -1.989   7.836 -19.462  1.00 15.03           C  
ATOM   3233  N   GLY A1292       2.291   8.901 -13.565  1.00 22.27           N  
ATOM   3234  CA  GLY A1292       3.634   8.359 -13.484  1.00 25.61           C  
ATOM   3235  C   GLY A1292       4.578   8.719 -14.609  1.00 27.08           C  
ATOM   3236  O   GLY A1292       5.750   8.322 -14.558  1.00 31.93           O  
ATOM   3237  N   GLU A1293       4.112   9.439 -15.623  1.00 24.18           N  
ATOM   3238  CA  GLU A1293       4.988   9.912 -16.685  1.00 25.17           C  
ATOM   3239  C   GLU A1293       5.986  10.923 -16.123  1.00 27.98           C  
ATOM   3240  O   GLU A1293       5.688  11.656 -15.176  1.00 33.56           O  
ATOM   3241  CB  GLU A1293       4.137  10.531 -17.797  1.00 24.51           C  
ATOM   3242  CG  GLU A1293       4.866  11.128 -18.979  1.00 28.16           C  
ATOM   3243  CD  GLU A1293       3.888  11.703 -19.985  1.00 22.58           C  
ATOM   3244  OE1 GLU A1293       2.697  11.328 -19.916  1.00 17.88           O  
ATOM   3245  OE2 GLU A1293       4.293  12.530 -20.828  1.00 20.10           O  
ATOM   3246  N   ARG A1294       7.196  10.939 -16.686  1.00 30.72           N  
ATOM   3247  CA  ARG A1294       8.222  11.876 -16.234  1.00 33.90           C  
ATOM   3248  C   ARG A1294       8.135  13.160 -17.050  1.00 34.57           C  
ATOM   3249  O   ARG A1294       8.285  13.108 -18.279  1.00 37.03           O  
ATOM   3250  CB  ARG A1294       9.612  11.274 -16.365  1.00 39.33           C  
ATOM   3251  CG  ARG A1294       9.758   9.877 -15.780  1.00 44.98           C  
ATOM   3252  CD  ARG A1294       9.520   9.841 -14.271  1.00 50.82           C  
ATOM   3253  NE  ARG A1294      10.747   9.606 -13.508  1.00 56.18           N  
ATOM   3254  CZ  ARG A1294      11.140  10.335 -12.467  1.00 59.07           C  
ATOM   3255  NH1 ARG A1294      12.271  10.043 -11.838  1.00 56.64           N  
ATOM   3256  NH2 ARG A1294      10.397  11.349 -12.044  1.00 58.75           N  
ATOM   3257  N   PRO A1295       7.905  14.324 -16.423  1.00 33.01           N  
ATOM   3258  CA  PRO A1295       7.752  15.592 -17.146  1.00 34.12           C  
ATOM   3259  C   PRO A1295       9.064  16.091 -17.745  1.00 37.23           C  
ATOM   3260  O   PRO A1295      10.107  15.502 -17.469  1.00 37.47           O  
ATOM   3261  CB  PRO A1295       7.244  16.562 -16.066  1.00 34.59           C  
ATOM   3262  CG  PRO A1295       6.887  15.702 -14.876  1.00 38.54           C  
ATOM   3263  CD  PRO A1295       7.767  14.503 -14.970  1.00 34.74           C  
TER    3264      PRO A1295                                                      
HETATM 3265  O   HOH A1301      -4.785  14.616 -33.443  1.00 27.86           O  
HETATM 3266  O   HOH A1302     -19.729  10.917 -18.341  1.00 31.96           O  
HETATM 3267  O   HOH A1303     -31.992  11.249 -14.318  1.00 30.83           O  
HETATM 3268  O   HOH A1304     -17.977  -6.373 -17.646  1.00 24.02           O  
HETATM 3269  O   HOH A1305      -2.021  37.926 -31.590  1.00 29.76           O  
HETATM 3270  O   HOH A1306      -4.108  -9.418 -14.562  1.00 22.46           O  
HETATM 3271  O   HOH A1307       1.143  10.015 -30.919  1.00 34.96           O  
HETATM 3272  O   HOH A1308      -0.132   3.713  -7.193  1.00 26.48           O  
HETATM 3273  O   HOH A1309      -0.732  -7.074 -26.222  1.00 32.68           O  
HETATM 3274  O   HOH A1310      -4.427  31.721  -6.352  1.00 25.68           O  
HETATM 3275  O   HOH A1311     -21.748   9.550   1.343  1.00 26.14           O  
HETATM 3276  O   HOH A1312     -16.955  17.216  -2.087  1.00 31.59           O  
HETATM 3277  O   HOH A1313     -11.762  26.552 -38.192  1.00 37.21           O  
HETATM 3278  O   HOH A1314      -1.330  12.081  -0.605  1.00 30.18           O  
HETATM 3279  O   HOH A1315     -23.169  30.005 -27.448  1.00 36.16           O  
HETATM 3280  O   HOH A1316     -25.598 -16.514  -9.871  1.00 32.92           O  
HETATM 3281  O   HOH A1317     -24.641   0.362  15.033  1.00 28.10           O  
HETATM 3282  O   HOH A1318      -1.393  17.498  -9.488  1.00 33.85           O  
HETATM 3283  O   HOH A1319     -14.387  35.986 -33.526  1.00 34.26           O  
HETATM 3284  O   HOH A1320     -14.331   9.222  13.469  1.00 30.27           O  
HETATM 3285  O   HOH A1321      -3.021  11.368  10.424  1.00 32.76           O  
HETATM 3286  O   HOH A1322       6.687  13.124 -20.689  1.00 31.54           O  
HETATM 3287  O   HOH A1323     -10.477   6.513 -25.481  1.00 35.05           O  
HETATM 3288  O   HOH A1324       6.153  -9.041  -4.238  1.00 35.49           O  
HETATM 3289  O   HOH A1325       1.642   1.644  -7.955  1.00 32.52           O  
HETATM 3290  O   HOH A1326     -30.328  -4.691 -10.544  1.00 16.88           O  
HETATM 3291  O   HOH A1327       9.952  39.253 -24.245  1.00 34.65           O  
HETATM 3292  O   HOH A1328      -3.554  25.862  -7.128  1.00 32.05           O  
HETATM 3293  O   HOH A1329     -15.402  -7.929  -5.271  1.00 14.57           O  
HETATM 3294  O   HOH A1330     -20.147  17.918   6.201  1.00 31.69           O  
HETATM 3295  O   HOH A1331      -6.585  20.777 -10.721  1.00 18.67           O  
HETATM 3296  O   HOH A1332     -26.225  13.822  -4.156  1.00 17.89           O  
HETATM 3297  O   HOH A1333       0.124  -7.187 -19.752  1.00 30.93           O  
HETATM 3298  O   HOH A1334      -5.799  16.798 -10.162  1.00 20.32           O  
HETATM 3299  O   HOH A1335     -10.959  -5.803   4.277  1.00 20.52           O  
HETATM 3300  O   HOH A1336     -27.895 -20.388  -2.688  1.00 30.45           O  
HETATM 3301  O   HOH A1337      10.564  35.106 -29.327  1.00 32.59           O  
HETATM 3302  O   HOH A1338      -7.824  20.355  -7.312  1.00 24.90           O  
HETATM 3303  O   HOH A1339       2.689   7.057 -17.543  1.00 21.39           O  
HETATM 3304  O   HOH A1340     -10.684  13.300 -28.419  1.00 35.03           O  
HETATM 3305  O   HOH A1341     -22.518 -13.401   7.828  1.00 25.98           O  
HETATM 3306  O   HOH A1342      -6.599  48.439 -20.378  1.00 21.13           O  
HETATM 3307  O   HOH A1343      -9.799  23.888   1.391  1.00 29.97           O  
HETATM 3308  O   HOH A1344      -0.464  21.008 -25.016  1.00 21.88           O  
HETATM 3309  O   HOH A1345     -20.985 -18.893   2.705  1.00 29.68           O  
HETATM 3310  O   HOH A1346       0.559   2.868  -0.845  1.00 20.69           O  
HETATM 3311  O   HOH A1347      -9.230   2.420 -20.494  1.00 16.17           O  
HETATM 3312  O   HOH A1348       2.395  -2.114   2.385  1.00 30.94           O  
HETATM 3313  O   HOH A1349       0.427  34.791 -37.297  1.00 36.93           O  
HETATM 3314  O   HOH A1350     -24.141  -9.126  10.396  1.00 27.98           O  
HETATM 3315  O   HOH A1351     -16.776  36.527 -12.112  1.00 25.89           O  
HETATM 3316  O   HOH A1352     -24.971  16.162  -4.292  1.00 22.66           O  
HETATM 3317  O   HOH A1353      -4.328  18.387 -28.358  1.00 29.19           O  
HETATM 3318  O   HOH A1354       0.463  21.923 -23.224  1.00 24.01           O  
HETATM 3319  O   HOH A1355      -5.586   0.497   2.987  1.00 22.28           O  
HETATM 3320  O   HOH A1356      -3.025   9.040 -22.385  1.00 17.84           O  
HETATM 3321  O   HOH A1357       6.916  23.626 -35.470  1.00 36.82           O  
HETATM 3322  O   HOH A1358      -8.666  44.059 -28.417  1.00 30.92           O  
HETATM 3323  O   HOH A1359      -5.336   1.236  -7.104  1.00 18.23           O  
HETATM 3324  O   HOH A1360      -5.377  35.784 -20.879  1.00 16.08           O  
HETATM 3325  O   HOH A1361     -14.099  11.280 -20.859  1.00 35.00           O  
HETATM 3326  O   HOH A1362     -10.038 -10.188 -10.556  1.00 27.10           O  
HETATM 3327  O   HOH A1363      -3.206  15.954  -9.631  1.00 19.74           O  
HETATM 3328  O   HOH A1364      -1.671  44.979 -31.425  1.00 37.45           O  
HETATM 3329  O   HOH A1365       6.445  34.236 -35.363  1.00 33.82           O  
HETATM 3330  O   HOH A1366      -0.052  36.511  -9.231  1.00 22.91           O  
HETATM 3331  O   HOH A1367     -15.399   1.068  17.630  1.00 37.64           O  
HETATM 3332  O   HOH A1368      -3.399  10.113  -8.077  1.00 22.70           O  
HETATM 3333  O   HOH A1369       3.992   8.123  -9.977  1.00 36.11           O  
HETATM 3334  O   HOH A1370      -3.440  10.993 -28.375  1.00 29.62           O  
HETATM 3335  O   HOH A1371     -16.777  11.318   0.652  1.00 16.31           O  
HETATM 3336  O   HOH A1372     -17.507  12.264 -14.994  1.00 32.79           O  
HETATM 3337  O   HOH A1373      -4.163  34.081  -9.247  1.00 21.91           O  
HETATM 3338  O   HOH A1374     -30.663 -13.127  -4.876  1.00 16.44           O  
HETATM 3339  O   HOH A1375     -35.814   0.064 -10.112  1.00 36.22           O  
HETATM 3340  O   HOH A1376     -10.923  34.915 -11.474  1.00 17.69           O  
HETATM 3341  O   HOH A1377     -31.982 -14.135 -11.487  1.00 28.92           O  
HETATM 3342  O   HOH A1378       5.543  29.566 -12.616  1.00 30.42           O  
HETATM 3343  O   HOH A1379     -22.606   8.128  -4.574  1.00 11.21           O  
HETATM 3344  O   HOH A1380      -8.940  40.666  -8.424  1.00 26.15           O  
HETATM 3345  O   HOH A1381     -14.515  30.979  -8.146  1.00 21.22           O  
HETATM 3346  O   HOH A1382     -21.963 -17.642   5.651  1.00 30.98           O  
HETATM 3347  O   HOH A1383      -6.030  15.078  -6.331  1.00 29.63           O  
HETATM 3348  O   HOH A1384       7.305  39.094 -31.144  1.00 34.76           O  
HETATM 3349  O   HOH A1385       2.995   0.542   1.444  1.00 30.25           O  
HETATM 3350  O   HOH A1386      -7.251  -1.635 -25.876  1.00 26.70           O  
HETATM 3351  O   HOH A1387      -6.070   2.197 -13.353  1.00 18.67           O  
HETATM 3352  O   HOH A1388      10.992  32.740 -21.850  1.00 29.39           O  
HETATM 3353  O   HOH A1389     -23.853  19.043 -10.631  1.00 27.03           O  
HETATM 3354  O   HOH A1390      -4.287  37.046  -9.828  1.00 24.19           O  
HETATM 3355  O   HOH A1391     -18.225  32.329 -11.054  1.00 22.45           O  
HETATM 3356  O   HOH A1392     -36.276 -15.159  -9.465  1.00 19.02           O  
HETATM 3357  O   HOH A1393      -7.956  -8.215 -14.086  1.00 23.47           O  
HETATM 3358  O   HOH A1394     -17.850   8.703   1.275  1.00 23.67           O  
HETATM 3359  O   HOH A1395     -30.000   7.493  11.564  1.00 29.90           O  
HETATM 3360  O   HOH A1396      -0.843  -6.829   1.027  1.00 34.54           O  
HETATM 3361  O   HOH A1397     -11.970 -13.873  -6.588  1.00 26.58           O  
HETATM 3362  O   HOH A1398      -6.466  43.495 -14.128  1.00 26.23           O  
HETATM 3363  O   HOH A1399      -4.095  -1.857   4.053  1.00 22.46           O  
HETATM 3364  O   HOH A1400     -16.745  10.322 -14.119  1.00 22.15           O  
HETATM 3365  O   HOH A1401      -9.913  41.652 -22.291  1.00 20.88           O  
HETATM 3366  O   HOH A1402     -14.363 -11.682  -6.041  1.00 18.41           O  
HETATM 3367  O   HOH A1403     -26.181  20.388 -13.074  1.00 43.70           O  
HETATM 3368  O   HOH A1404     -23.766   9.945   2.993  1.00 20.87           O  
HETATM 3369  O   HOH A1405     -30.558  -0.983 -12.053  1.00 19.37           O  
HETATM 3370  O   HOH A1406     -14.763  41.985 -16.229  1.00 28.36           O  
HETATM 3371  O   HOH A1407       7.729  27.105 -33.698  1.00 37.16           O  
HETATM 3372  O   HOH A1408      -3.153  -4.749   0.875  1.00 18.99           O  
HETATM 3373  O   HOH A1409     -13.842  -0.220 -20.680  1.00 21.33           O  
HETATM 3374  O   HOH A1410     -12.182  30.950  -6.771  1.00 23.28           O  
HETATM 3375  O   HOH A1411     -18.042  16.479  15.043  1.00 41.51           O  
HETATM 3376  O   HOH A1412      -3.817 -11.244  -2.421  1.00 30.78           O  
HETATM 3377  O   HOH A1413      -9.941   5.579 -12.132  1.00 15.23           O  
HETATM 3378  O   HOH A1414       5.683  25.361 -20.415  1.00 25.46           O  
HETATM 3379  O   HOH A1415       3.392   6.985 -30.523  1.00 34.66           O  
HETATM 3380  O   HOH A1416     -36.339  -8.830  -5.831  1.00 20.48           O  
HETATM 3381  O   HOH A1417     -26.067  10.157  11.765  1.00 25.48           O  
HETATM 3382  O   HOH A1418     -14.130  16.883  -8.523  1.00 26.23           O  
HETATM 3383  O   HOH A1419     -23.760   9.083  12.976  1.00 25.12           O  
HETATM 3384  O   HOH A1420       1.886 -10.860 -11.290  1.00 32.25           O  
HETATM 3385  O   HOH A1421      -5.288  -2.843  10.355  1.00 33.25           O  
HETATM 3386  O   HOH A1422      -6.109  44.686 -21.365  1.00 19.00           O  
HETATM 3387  O   HOH A1423     -10.144  19.805 -18.017  1.00 16.86           O  
HETATM 3388  O   HOH A1424     -11.551  -9.946   1.189  1.00 31.49           O  
HETATM 3389  O   HOH A1425       9.043   3.339 -22.082  1.00 39.49           O  
HETATM 3390  O   HOH A1426      -8.150  46.161 -27.389  1.00 35.38           O  
HETATM 3391  O   HOH A1427       6.610  16.160 -31.251  1.00 37.02           O  
HETATM 3392  O   HOH A1428     -21.006   2.384  17.540  1.00 31.75           O  
HETATM 3393  O   HOH A1429       1.314  -1.542 -10.298  1.00 32.17           O  
HETATM 3394  O   HOH A1430     -15.008  14.539 -11.376  1.00 24.81           O  
HETATM 3395  O   HOH A1431      -8.211   7.598  14.963  1.00 29.94           O  
HETATM 3396  O   HOH A1432     -11.121  -9.573  -2.972  1.00 24.55           O  
HETATM 3397  O   HOH A1433     -23.438  -2.629  13.185  1.00 21.98           O  
HETATM 3398  O   HOH A1434      -0.249  18.020 -23.265  1.00 24.09           O  
HETATM 3399  O   HOH A1435     -37.191  -9.919  -3.722  1.00 22.84           O  
HETATM 3400  O   HOH A1436     -17.681   7.039 -19.112  1.00 29.00           O  
HETATM 3401  O   HOH A1437     -17.865  34.296  -2.713  1.00 28.46           O  
HETATM 3402  O   HOH A1438      -5.615   8.123  -8.420  1.00 19.48           O  
HETATM 3403  O   HOH A1439       4.783   8.291   6.552  1.00 32.20           O  
HETATM 3404  O   HOH A1440     -14.143  21.985  -1.442  1.00 29.79           O  
HETATM 3405  O   HOH A1441      -8.744  -1.298 -11.092  1.00 13.14           O  
HETATM 3406  O   HOH A1442     -35.161 -11.422 -15.029  1.00 31.86           O  
HETATM 3407  O   HOH A1443     -31.001  -0.359 -16.665  1.00 34.78           O  
HETATM 3408  O   HOH A1444     -19.507  46.685 -20.265  1.00 37.85           O  
HETATM 3409  O   HOH A1445      -7.597   6.914 -27.280  1.00 25.58           O  
HETATM 3410  O   HOH A1446     -28.876 -19.013   2.440  1.00 31.80           O  
HETATM 3411  O   HOH A1447      -2.026  -4.402  -7.628  1.00 20.36           O  
HETATM 3412  O   HOH A1448      -4.055  27.315 -12.926  1.00 14.53           O  
HETATM 3413  O   HOH A1449      -9.493  44.902 -25.037  1.00 26.83           O  
HETATM 3414  O   HOH A1450      -8.143  43.706 -18.926  1.00 26.14           O  
HETATM 3415  O   HOH A1451      -5.236   8.415 -20.821  1.00 26.10           O  
HETATM 3416  O   HOH A1452     -10.001   2.291  11.515  1.00 27.67           O  
HETATM 3417  O   HOH A1453     -17.845  20.584 -14.470  1.00 28.11           O  
HETATM 3418  O   HOH A1454       2.556  44.178 -27.004  1.00 37.55           O  
HETATM 3419  O   HOH A1455      -8.635  -6.692 -16.861  1.00 26.33           O  
HETATM 3420  O   HOH A1456     -15.720  34.357  -1.440  1.00 24.79           O  
HETATM 3421  O   HOH A1457     -11.110   7.308  14.529  1.00 26.86           O  
HETATM 3422  O   HOH A1458     -19.346   4.538 -19.052  1.00 29.86           O  
HETATM 3423  O   HOH A1459     -24.532  -4.953   6.153  1.00 21.62           O  
HETATM 3424  O   HOH A1460     -11.589   5.162 -22.578  1.00 25.67           O  
HETATM 3425  O   HOH A1461     -27.078  -2.314   3.307  1.00 27.43           O  
HETATM 3426  O   HOH A1462     -30.500  -6.593   9.205  1.00 33.71           O  
HETATM 3427  O   HOH A1463       3.213  35.194 -29.318  1.00 23.79           O  
HETATM 3428  O   HOH A1464      -3.500  -7.175   3.025  1.00 30.79           O  
HETATM 3429  O   HOH A1465     -13.557  12.146 -14.162  1.00 24.40           O  
HETATM 3430  O   HOH A1466      -0.363  13.682  -7.464  1.00 27.33           O  
HETATM 3431  O   HOH A1467       1.014   6.038  -8.343  1.00 24.79           O  
HETATM 3432  O   HOH A1468     -11.155  24.389  -1.548  1.00 28.53           O  
HETATM 3433  O   HOH A1469       1.106  -1.727   6.845  1.00 28.30           O  
HETATM 3434  O   HOH A1470      -5.116 -11.733  -4.725  1.00 29.81           O  
HETATM 3435  O   HOH A1471      -6.269  14.290   6.100  1.00 32.15           O  
HETATM 3436  O   HOH A1472     -13.576  18.646 -18.320  1.00 27.57           O  
HETATM 3437  O   HOH A1473      -3.983  -5.662  -9.176  1.00 14.62           O  
HETATM 3438  O   HOH A1474     -14.723  14.873   5.095  1.00 30.18           O  
HETATM 3439  O   HOH A1475      -8.997  18.263  -5.055  1.00 28.83           O  
HETATM 3440  O   HOH A1476      -6.215 -12.398  -8.187  1.00 21.15           O  
HETATM 3441  O   HOH A1477      -9.240  26.363  -2.600  1.00 22.58           O  
HETATM 3442  O   HOH A1478      -4.083  20.895  -4.743  1.00 32.04           O  
HETATM 3443  O   HOH A1479     -16.737 -13.382  -1.611  1.00 26.22           O  
HETATM 3444  O   HOH A1480     -23.366 -17.670  -9.218  1.00 26.23           O  
HETATM 3445  O   HOH A1481     -28.778   5.825   6.976  1.00 26.30           O  
HETATM 3446  O   HOH A1482       5.729  38.431 -18.780  1.00 19.91           O  
HETATM 3447  O   HOH A1483     -20.257  -8.593  11.386  1.00 27.93           O  
HETATM 3448  O   HOH A1484     -22.648   4.853 -12.513  1.00 14.96           O  
HETATM 3449  O   HOH A1485     -19.519  26.489  -5.942  1.00 37.99           O  
HETATM 3450  O   HOH A1486       5.592   6.233 -17.887  1.00 23.89           O  
HETATM 3451  O   HOH A1487       2.340   5.669  -3.585  1.00 30.52           O  
HETATM 3452  O   HOH A1488      -6.485   8.465 -18.557  1.00 17.15           O  
HETATM 3453  O   HOH A1489     -17.652   8.290  14.941  1.00 24.44           O  
HETATM 3454  O   HOH A1490     -18.703  35.992 -16.322  1.00 29.53           O  
HETATM 3455  O   HOH A1491     -14.360   8.085 -15.778  1.00 22.01           O  
HETATM 3456  O   HOH A1492     -12.467  26.963 -25.264  1.00 24.13           O  
HETATM 3457  O   HOH A1493       4.771  42.337 -28.120  1.00 32.19           O  
HETATM 3458  O   HOH A1494     -11.496  -3.724   2.698  1.00 16.63           O  
HETATM 3459  O   HOH A1495     -32.665  -7.790   8.234  1.00 31.67           O  
HETATM 3460  O   HOH A1496      -1.339  43.104 -18.370  1.00 27.00           O  
HETATM 3461  O   HOH A1497      -8.091  12.767  -6.467  1.00 15.26           O  
HETATM 3462  O   HOH A1498     -13.836 -13.268  -3.962  1.00 28.20           O  
HETATM 3463  O   HOH A1499      -6.177  10.569   9.244  1.00 27.86           O  
HETATM 3464  O   HOH A1500      -3.050  11.602  -5.943  1.00 23.30           O  
HETATM 3465  O   HOH A1501     -17.064  16.871  -8.433  1.00 29.37           O  
HETATM 3466  O   HOH A1502      -8.939  -4.801 -18.612  1.00 26.68           O  
HETATM 3467  O   HOH A1503     -29.833   3.513   2.879  1.00 36.44           O  
HETATM 3468  O   HOH A1504     -21.605  22.908  -8.638  1.00 26.47           O  
HETATM 3469  O   HOH A1505     -20.511  27.969 -10.017  1.00 25.09           O  
HETATM 3470  O   HOH A1506       1.390  20.211 -13.304  1.00 21.19           O  
HETATM 3471  O   HOH A1507     -16.965  13.340   3.928  1.00 26.32           O  
HETATM 3472  O   HOH A1508       8.970  25.918 -19.777  1.00 28.61           O  
HETATM 3473  O   HOH A1509     -11.564  17.760  -6.560  1.00 28.12           O  
HETATM 3474  O   HOH A1510     -20.415  33.974  -6.388  1.00 24.33           O  
HETATM 3475  O   HOH A1511       3.475  11.734 -13.176  1.00 23.78           O  
HETATM 3476  O   HOH A1512       6.640  36.292 -15.739  1.00 24.66           O  
HETATM 3477  O   HOH A1513     -36.238  -2.115  -5.590  1.00 19.15           O  
HETATM 3478  O   HOH A1514     -30.735   2.007  12.885  1.00 31.53           O  
HETATM 3479  O   HOH A1515     -20.873  40.000 -26.401  1.00 35.60           O  
HETATM 3480  O   HOH A1516     -22.432  18.510   8.013  1.00 26.65           O  
HETATM 3481  O   HOH A1517     -12.351  41.930  -9.895  1.00 23.66           O  
HETATM 3482  O   HOH A1518      -2.318  45.434 -19.219  1.00 24.07           O  
HETATM 3483  O   HOH A1519      -0.718  10.748  -4.014  1.00 29.09           O  
HETATM 3484  O   HOH A1520     -16.359  -4.278 -18.964  1.00 22.21           O  
HETATM 3485  O   HOH A1521     -13.632  10.601 -17.645  1.00 31.40           O  
HETATM 3486  O   HOH A1522       8.272  26.782 -14.947  1.00 31.54           O  
HETATM 3487  O   HOH A1523     -31.729  -6.532   5.254  1.00 25.37           O  
HETATM 3488  O   HOH A1524     -10.163  49.313 -20.758  1.00 24.61           O  
HETATM 3489  O   HOH A1525     -38.765   4.086  -4.374  1.00 35.86           O  
HETATM 3490  O   HOH A1526     -13.644 -10.986 -11.763  1.00 25.23           O  
HETATM 3491  O   HOH A1527     -10.680  -0.198  12.872  1.00 33.22           O  
HETATM 3492  O   HOH A1528     -18.962 -14.817 -10.175  1.00 20.96           O  
HETATM 3493  O   HOH A1529     -15.779 -13.278   5.571  1.00 26.61           O  
HETATM 3494  O   HOH A1530     -18.807  13.877 -14.015  1.00 32.38           O  
HETATM 3495  O   HOH A1531      -4.719  -3.585 -20.482  1.00 19.95           O  
HETATM 3496  O   HOH A1532       0.550  37.099 -13.848  1.00 17.63           O  
HETATM 3497  O   HOH A1533       5.818  19.774 -14.966  1.00 31.27           O  
HETATM 3498  O   HOH A1534       5.597  -3.530  -4.492  1.00 29.26           O  
HETATM 3499  O   HOH A1535     -12.484  12.778 -16.461  1.00 26.88           O  
HETATM 3500  O   HOH A1536       8.470  29.941 -13.424  1.00 30.38           O  
HETATM 3501  O   HOH A1537     -11.390  48.893 -24.478  1.00 28.93           O  
HETATM 3502  O   HOH A1538     -14.709  22.587 -34.527  1.00 37.95           O  
HETATM 3503  O   HOH A1539     -19.135  30.577  -4.278  1.00 36.63           O  
HETATM 3504  O   HOH A1540     -19.834  -3.902  15.103  1.00 29.43           O  
HETATM 3505  O   HOH A1541      -1.583  -2.850   3.759  1.00 24.49           O  
HETATM 3506  O   HOH A1542      -2.928  48.564 -26.135  1.00 24.51           O  
HETATM 3507  O   HOH A1543      -6.429   3.862 -28.568  1.00 26.00           O  
HETATM 3508  O   HOH A1544       6.968  19.098 -24.744  1.00 20.48           O  
HETATM 3509  O   HOH A1545     -13.080   5.660  19.669  1.00 31.58           O  
HETATM 3510  O   HOH A1546      -2.186 -15.525 -12.701  1.00 17.39           O  
HETATM 3511  O   HOH A1547     -24.683  -3.354   3.979  1.00 26.22           O  
HETATM 3512  O   HOH A1548     -28.972   7.063   1.829  1.00 29.49           O  
HETATM 3513  O   HOH A1549      -7.186   9.661  11.639  1.00 24.82           O  
HETATM 3514  O   HOH A1550     -27.821 -16.819   7.562  1.00 35.31           O  
HETATM 3515  O   HOH A1551     -19.063 -17.385  -9.100  1.00 33.36           O  
HETATM 3516  O   HOH A1552     -16.475  -5.612   7.432  1.00 24.95           O  
HETATM 3517  O   HOH A1553     -13.019   6.462  16.782  1.00 29.50           O  
HETATM 3518  O   HOH A1554      -2.417  42.059 -15.987  1.00 21.37           O  
HETATM 3519  O   HOH A1555     -11.619  23.517 -34.870  1.00 37.16           O  
HETATM 3520  O   HOH A1556     -32.676  -6.941 -12.204  1.00 20.15           O  
HETATM 3521  O   HOH A1557       5.546  41.046 -25.573  1.00 25.51           O  
HETATM 3522  O   HOH A1558     -18.371  13.262  11.529  1.00 29.35           O  
HETATM 3523  O   HOH A1559       7.484   5.530 -21.244  1.00 30.93           O  
HETATM 3524  O   HOH A1560     -33.326   0.911 -15.406  1.00 32.06           O  
HETATM 3525  O   HOH A1561     -11.039  37.487  -7.739  1.00 19.72           O  
HETATM 3526  O   HOH A1562      -7.767  22.209   4.064  1.00 32.85           O  
HETATM 3527  O   HOH A1563     -31.810 -19.628  -4.448  1.00 31.87           O  
HETATM 3528  O   HOH A1564       5.751  22.642 -26.999  1.00 33.03           O  
HETATM 3529  O   HOH A1565      -4.519   0.000  12.551  1.00 32.34           O  
HETATM 3530  O   HOH A1566      13.080  36.855 -20.852  1.00 38.78           O  
HETATM 3531  O   HOH A1567     -20.930  17.211   0.209  1.00 25.10           O  
HETATM 3532  O   HOH A1568     -10.686  36.414  -4.896  1.00 22.85           O  
HETATM 3533  O   HOH A1569       7.653   8.600 -18.765  1.00 29.90           O  
HETATM 3534  O   HOH A1570     -15.362  21.159 -16.549  1.00 13.95           O  
HETATM 3535  O   HOH A1571     -30.262 -17.863   6.750  1.00 30.49           O  
HETATM 3536  O   HOH A1572      -4.273  44.920 -17.553  1.00 25.77           O  
HETATM 3537  O   HOH A1573     -12.495  49.831 -22.176  1.00 31.85           O  
HETATM 3538  O   HOH A1574      -1.112  40.404 -14.054  1.00 23.76           O  
HETATM 3539  O   HOH A1575     -29.834 -19.599   4.916  1.00 27.05           O  
HETATM 3540  O   HOH A1576     -15.488  38.432 -34.362  1.00 38.12           O  
HETATM 3541  O   HOH A1577     -14.480  -4.704   9.962  1.00 32.55           O  
HETATM 3542  O   HOH A1578      -1.008 -11.975  -7.163  1.00 35.65           O  
HETATM 3543  O   HOH A1579      -5.298  -0.746  14.507  1.00 22.48           O  
HETATM 3544  O   HOH A1580     -22.298  -9.834  11.351  1.00 36.07           O  
HETATM 3545  O   HOH A1581     -30.087  -0.724 -20.905  1.00 41.24           O  
HETATM 3546  O   HOH A1582     -20.934  -2.866 -22.502  1.00 33.58           O  
HETATM 3547  O   HOH A1583     -23.182 -16.216   7.688  1.00 31.23           O  
HETATM 3548  O   HOH A1584     -11.919  -6.078   6.921  1.00 34.23           O  
HETATM 3549  O   HOH A1585     -13.597 -10.709   2.107  1.00 33.10           O  
HETATM 3550  O   HOH A1586       0.809 -13.202  -1.476  1.00 37.63           O  
HETATM 3551  O   HOH A1587      13.114  34.028 -21.785  1.00 38.13           O  
HETATM 3552  O   HOH A1588      -5.498  -3.930  13.770  1.00 30.08           O  
HETATM 3553  O   HOH A1589       7.228  -0.272   0.981  1.00 33.31           O  
HETATM 3554  O   HOH A1590      -5.325  18.765  -7.997  1.00 29.12           O  
HETATM 3555  O   HOH A1591     -22.281  38.869 -25.061  1.00 39.41           O  
HETATM 3556  O   HOH A1592     -11.495   1.388 -22.030  1.00 23.27           O  
HETATM 3557  O   HOH A1593       5.465  10.026 -10.242  1.00 34.09           O  
HETATM 3558  O   HOH A1594      -6.450  45.967 -18.478  1.00 24.51           O  
HETATM 3559  O   HOH A1595     -19.705  30.989  -9.241  1.00 34.83           O  
HETATM 3560  O   HOH A1596      -5.031  26.256  -2.372  1.00 34.07           O  
HETATM 3561  O   HOH A1597     -29.669   1.212   3.235  1.00 35.57           O  
HETATM 3562  O   HOH A1598     -37.308  -2.439  -3.134  1.00 31.42           O  
HETATM 3563  O   HOH A1599     -22.890  -1.098  17.075  1.00 37.10           O  
HETATM 3564  O   HOH A1600     -15.738  41.652 -13.447  1.00 28.29           O  
HETATM 3565  O   HOH A1601       6.450  39.303 -16.539  1.00 34.02           O  
HETATM 3566  O   HOH A1602      -3.908  14.886  -5.825  1.00 33.26           O  
HETATM 3567  O   HOH A1603       5.380   9.574 -32.452  1.00 32.78           O  
HETATM 3568  O   HOH A1604       1.492 -12.801 -13.188  1.00 31.24           O  
HETATM 3569  O   HOH A1605      -9.959  52.440 -26.328  1.00 36.50           O  
HETATM 3570  O   HOH A1606     -14.861 -13.053   2.430  1.00 37.45           O  
HETATM 3571  O   HOH A1607     -13.004  15.403   6.897  1.00 28.74           O  
HETATM 3572  O   HOH A1608      -8.248  38.444  -7.146  1.00 34.35           O  
HETATM 3573  O   HOH A1609       8.431  40.314 -26.299  1.00 33.02           O  
HETATM 3574  O   HOH A1610     -17.662 -14.354 -12.657  1.00 31.63           O  
HETATM 3575  O   HOH A1611     -22.663  -2.911  15.374  1.00 31.14           O  
HETATM 3576  O   HOH A1612     -21.527  25.142 -36.408  1.00 38.90           O  
HETATM 3577  O   HOH A1613     -11.241 -14.404  -4.088  1.00 33.69           O  
HETATM 3578  O   HOH A1614       5.714  10.751   6.692  1.00 28.78           O  
HETATM 3579  O   HOH A1615     -15.396  13.703 -13.607  1.00 32.53           O  
HETATM 3580  O   HOH A1616      -2.575  11.788  12.813  1.00 27.74           O  
HETATM 3581  O   HOH A1617     -39.519 -10.240  -2.969  1.00 27.08           O  
HETATM 3582  O   HOH A1618       3.936  21.107 -13.800  1.00 27.07           O  
HETATM 3583  O   HOH A1619      -7.776   9.718 -28.799  1.00 35.17           O  
HETATM 3584  O   HOH A1620       7.498  18.852 -13.697  1.00 39.62           O  
HETATM 3585  O   HOH A1621     -28.513 -23.079  -8.003  1.00 35.03           O  
HETATM 3586  O   HOH A1622     -30.461   4.503   9.201  1.00 35.00           O  
CONECT 2827 3136                                                                
CONECT 3136 2827                                                                
MASTER      286    0    0    6   36    0    0    6 3585    1    2   34          
END                                                                             
