# Supplementary material for: High resolution crystal structures of the receptor-binding domain of Clostridium botulinum neurotoxin serotypes A and FA
Source: PeerJ. 2018 Mar 21;6:e4552. doi: 10.7717/peerj.4552 (PMC5866713; doi:10.7717/peerj.4552)
Supplement: Supplemental Information 1 [file peerj-06-4552-s001.zip › 5MK8.pdb]

HEADER    TOXIN                                   02-DEC-16   5MK8              
TITLE     CRYSTAL STRUCTURE OF THE RECEPTOR-BINDING DOMAIN OF THE FA HYBRID     
TITLE    2 CLOSTRIDIUM BOTULINUM NEUROTOXIN                                     
COMPND    MOL_ID: 1;                                                            
COMPND   2 MOLECULE: BOTULINUM NEUROTOXIN FA BINDING DOMAIN;                    
COMPND   3 CHAIN: A, B;                                                         
COMPND   4 ENGINEERED: YES;                                                     
COMPND   5 OTHER_DETAILS: THE PROTEIN SEQUENCE MATCHES GENBANK KGO15617.1 FROM  
COMPND   6 RESIDUE 859 ONWARD.                                                  
SOURCE    MOL_ID: 1;                                                            
SOURCE   2 ORGANISM_SCIENTIFIC: CLOSTRIDIUM BOTULINUM;                          
SOURCE   3 ORGANISM_TAXID: 1491;                                                
SOURCE   4 EXPRESSION_SYSTEM: ESCHERICHIA COLI;                                 
SOURCE   5 EXPRESSION_SYSTEM_TAXID: 562                                         
KEYWDS    BACTERIAL TOXIN TOXIN RECEPTOR BINDING DOMAIN JELLY ROLL FOLD BETA    
KEYWDS   2 TREFOIL FOLD, TOXIN                                                  
EXPDTA    X-RAY DIFFRACTION                                                     
AUTHOR    J.R.DAVIES,K.R.ACHARYA                                                
JRNL        AUTH   J.R.DAVIES,G.HACKETT,S.M.LIU,K.R.ACHARYA                     
JRNL        TITL   CRYSTAL STRUCTURE OF THE RECEPTOR-BINDING DOMAIN OF THE FA   
JRNL        TITL 2 HYBRID CLOSTRIDIUM BOTULINUM NEUROTOXIN                      
JRNL        REF    TO BE PUBLISHED                                              
JRNL        REFN                                                                
REMARK   2                                                                      
REMARK   2 RESOLUTION.    1.95 ANGSTROMS.                                       
REMARK   3                                                                      
REMARK   3 REFINEMENT.                                                          
REMARK   3   PROGRAM     : PHENIX (1.10.1_2155: ???)                            
REMARK   3   AUTHORS     : PAUL ADAMS,PAVEL AFONINE,VINCENT CHEN,IAN            
REMARK   3               : DAVIS,KRESHNA GOPAL,RALF GROSSE-KUNSTLEVE,           
REMARK   3               : LI-WEI HUNG,ROBERT IMMORMINO,TOM IOERGER,            
REMARK   3               : AIRLIE MCCOY,ERIK MCKEE,NIGEL MORIARTY,              
REMARK   3               : REETAL PAI,RANDY READ,JANE RICHARDSON,               
REMARK   3               : DAVID RICHARDSON,TOD ROMO,JIM SACCHETTINI,           
REMARK   3               : NICHOLAS SAUTER,JACOB SMITH,LAURENT                  
REMARK   3               : STORONI,TOM TERWILLIGER,PETER ZWART                  
REMARK   3                                                                      
REMARK   3    REFINEMENT TARGET : NULL                                          
REMARK   3                                                                      
REMARK   3  DATA USED IN REFINEMENT.                                            
REMARK   3   RESOLUTION RANGE HIGH (ANGSTROMS) : 1.95                           
REMARK   3   RESOLUTION RANGE LOW  (ANGSTROMS) : 118.01                         
REMARK   3   MIN(FOBS/SIGMA_FOBS)              : 1.340                          
REMARK   3   COMPLETENESS FOR RANGE        (%) : 100.0                          
REMARK   3   NUMBER OF REFLECTIONS             : 89848                          
REMARK   3                                                                      
REMARK   3  FIT TO DATA USED IN REFINEMENT.                                     
REMARK   3   R VALUE     (WORKING + TEST SET) : 0.181                           
REMARK   3   R VALUE            (WORKING SET) : 0.179                           
REMARK   3   FREE R VALUE                     : 0.212                           
REMARK   3   FREE R VALUE TEST SET SIZE   (%) : 5.010                           
REMARK   3   FREE R VALUE TEST SET COUNT      : 4504                            
REMARK   3                                                                      
REMARK   3  FIT TO DATA USED IN REFINEMENT (IN BINS).                           
REMARK   3   BIN  RESOLUTION RANGE  COMPL.    NWORK NFREE   RWORK  RFREE        
REMARK   3                                                                      
REMARK   3  BULK SOLVENT MODELLING.                                             
REMARK   3   METHOD USED        : NULL                                          
REMARK   3   SOLVENT RADIUS     : 1.11                                          
REMARK   3   SHRINKAGE RADIUS   : 0.90                                          
REMARK   3   K_SOL              : NULL                                          
REMARK   3   B_SOL              : NULL                                          
REMARK   3                                                                      
REMARK   3  ERROR ESTIMATES.                                                    
REMARK   3   COORDINATE ERROR (MAXIMUM-LIKELIHOOD BASED)     : 0.200            
REMARK   3   PHASE ERROR (DEGREES, MAXIMUM-LIKELIHOOD BASED) : 20.870           
REMARK   3                                                                      
REMARK   3  B VALUES.                                                           
REMARK   3   FROM WILSON PLOT           (A**2) : NULL                           
REMARK   3   MEAN B VALUE      (OVERALL, A**2) : NULL                           
REMARK   3   OVERALL ANISOTROPIC B VALUE.                                       
REMARK   3    B11 (A**2) : NULL                                                 
REMARK   3    B22 (A**2) : NULL                                                 
REMARK   3    B33 (A**2) : NULL                                                 
REMARK   3    B12 (A**2) : NULL                                                 
REMARK   3    B13 (A**2) : NULL                                                 
REMARK   3    B23 (A**2) : NULL                                                 
REMARK   3                                                                      
REMARK   3  TWINNING INFORMATION.                                               
REMARK   3   FRACTION: NULL                                                     
REMARK   3   OPERATOR: NULL                                                     
REMARK   3                                                                      
REMARK   3  DEVIATIONS FROM IDEAL VALUES.                                       
REMARK   3                 RMSD          COUNT                                  
REMARK   3   BOND      :  0.007           7075                                  
REMARK   3   ANGLE     :  0.878           9540                                  
REMARK   3   CHIRALITY :  0.061           1016                                  
REMARK   3   PLANARITY :  0.004           1224                                  
REMARK   3   DIHEDRAL  : 14.745           4221                                  
REMARK   3                                                                      
REMARK   3  TLS DETAILS                                                         
REMARK   3   NUMBER OF TLS GROUPS  : NULL                                       
REMARK   3                                                                      
REMARK   3  NCS DETAILS                                                         
REMARK   3   NUMBER OF NCS GROUPS : NULL                                        
REMARK   3                                                                      
REMARK   3  OTHER REFINEMENT REMARKS: NULL                                      
REMARK   4                                                                      
REMARK   4 5MK8 COMPLIES WITH FORMAT V. 3.30, 13-JUL-11                         
REMARK 100                                                                      
REMARK 100 THIS ENTRY HAS BEEN PROCESSED BY PDBE ON 02-DEC-16.                  
REMARK 100 THE DEPOSITION ID IS D_1200002586.                                   
REMARK 200                                                                      
REMARK 200 EXPERIMENTAL DETAILS                                                 
REMARK 200  EXPERIMENT TYPE                : X-RAY DIFFRACTION                  
REMARK 200  DATE OF DATA COLLECTION        : 15-DEC-15                          
REMARK 200  TEMPERATURE           (KELVIN) : 100                                
REMARK 200  PH                             : 5.5                                
REMARK 200  NUMBER OF CRYSTALS USED        : 1                                  
REMARK 200                                                                      
REMARK 200  SYNCHROTRON              (Y/N) : Y                                  
REMARK 200  RADIATION SOURCE               : DIAMOND                            
REMARK 200  BEAMLINE                       : I03                                
REMARK 200  X-RAY GENERATOR MODEL          : NULL                               
REMARK 200  MONOCHROMATIC OR LAUE    (M/L) : M                                  
REMARK 200  WAVELENGTH OR RANGE        (A) : 0.97625                            
REMARK 200  MONOCHROMATOR                  : NULL                               
REMARK 200  OPTICS                         : NULL                               
REMARK 200                                                                      
REMARK 200  DETECTOR TYPE                  : PIXEL                              
REMARK 200  DETECTOR MANUFACTURER          : DECTRIS PILATUS3 6M                
REMARK 200  INTENSITY-INTEGRATION SOFTWARE : DIALS                              
REMARK 200  DATA SCALING SOFTWARE          : AIMLESS                            
REMARK 200                                                                      
REMARK 200  NUMBER OF UNIQUE REFLECTIONS   : 89871                              
REMARK 200  RESOLUTION RANGE HIGH      (A) : 1.950                              
REMARK 200  RESOLUTION RANGE LOW       (A) : 118.009                            
REMARK 200  REJECTION CRITERIA  (SIGMA(I)) : NULL                               
REMARK 200                                                                      
REMARK 200 OVERALL.                                                             
REMARK 200  COMPLETENESS FOR RANGE     (%) : 100.0                              
REMARK 200  DATA REDUNDANCY                : 26.00                              
REMARK 200  R MERGE                    (I) : NULL                               
REMARK 200  R SYM                      (I) : NULL                               
REMARK 200  <I/SIGMA(I)> FOR THE DATA SET  : 12.6000                            
REMARK 200                                                                      
REMARK 200 IN THE HIGHEST RESOLUTION SHELL.                                     
REMARK 200  HIGHEST RESOLUTION SHELL, RANGE HIGH (A) : 1.95                     
REMARK 200  HIGHEST RESOLUTION SHELL, RANGE LOW  (A) : 1.98                     
REMARK 200  COMPLETENESS FOR SHELL     (%) : 100.0                              
REMARK 200  DATA REDUNDANCY IN SHELL       : 23.70                              
REMARK 200  R MERGE FOR SHELL          (I) : NULL                               
REMARK 200  R SYM FOR SHELL            (I) : NULL                               
REMARK 200  <I/SIGMA(I)> FOR SHELL         : 2.300                              
REMARK 200                                                                      
REMARK 200 DIFFRACTION PROTOCOL: SINGLE WAVELENGTH                              
REMARK 200 METHOD USED TO DETERMINE THE STRUCTURE: MOLECULAR REPLACEMENT        
REMARK 200 SOFTWARE USED: PHASER                                                
REMARK 200 STARTING MODEL: NULL                                                 
REMARK 200                                                                      
REMARK 200 REMARK: NULL                                                         
REMARK 280                                                                      
REMARK 280 CRYSTAL                                                              
REMARK 280 SOLVENT CONTENT, VS   (%): 58.57                                     
REMARK 280 MATTHEWS COEFFICIENT, VM (ANGSTROMS**3/DA): 2.97                     
REMARK 280                                                                      
REMARK 280 CRYSTALLIZATION CONDITIONS: 4 M SODIUM FORMATE, 0.1 M SODIUM         
REMARK 280  ACETATE, PH 5.5, VAPOR DIFFUSION, SITTING DROP, TEMPERATURE         
REMARK 280  289.15K                                                             
REMARK 290                                                                      
REMARK 290 CRYSTALLOGRAPHIC SYMMETRY                                            
REMARK 290 SYMMETRY OPERATORS FOR SPACE GROUP: P 4 2 2                          
REMARK 290                                                                      
REMARK 290      SYMOP   SYMMETRY                                                
REMARK 290     NNNMMM   OPERATOR                                                
REMARK 290       1555   X,Y,Z                                                   
REMARK 290       2555   -X,-Y,Z                                                 
REMARK 290       3555   -Y,X,Z                                                  
REMARK 290       4555   Y,-X,Z                                                  
REMARK 290       5555   -X,Y,-Z                                                 
REMARK 290       6555   X,-Y,-Z                                                 
REMARK 290       7555   Y,X,-Z                                                  
REMARK 290       8555   -Y,-X,-Z                                                
REMARK 290                                                                      
REMARK 290     WHERE NNN -> OPERATOR NUMBER                                     
REMARK 290           MMM -> TRANSLATION VECTOR                                  
REMARK 290                                                                      
REMARK 290 CRYSTALLOGRAPHIC SYMMETRY TRANSFORMATIONS                            
REMARK 290 THE FOLLOWING TRANSFORMATIONS OPERATE ON THE ATOM/HETATM             
REMARK 290 RECORDS IN THIS ENTRY TO PRODUCE CRYSTALLOGRAPHICALLY                
REMARK 290 RELATED MOLECULES.                                                   
REMARK 290   SMTRY1   1  1.000000  0.000000  0.000000        0.00000            
REMARK 290   SMTRY2   1  0.000000  1.000000  0.000000        0.00000            
REMARK 290   SMTRY3   1  0.000000  0.000000  1.000000        0.00000            
REMARK 290   SMTRY1   2 -1.000000  0.000000  0.000000        0.00000            
REMARK 290   SMTRY2   2  0.000000 -1.000000  0.000000        0.00000            
REMARK 290   SMTRY3   2  0.000000  0.000000  1.000000        0.00000            
REMARK 290   SMTRY1   3  0.000000 -1.000000  0.000000        0.00000            
REMARK 290   SMTRY2   3  1.000000  0.000000  0.000000        0.00000            
REMARK 290   SMTRY3   3  0.000000  0.000000  1.000000        0.00000            
REMARK 290   SMTRY1   4  0.000000  1.000000  0.000000        0.00000            
REMARK 290   SMTRY2   4 -1.000000  0.000000  0.000000        0.00000            
REMARK 290   SMTRY3   4  0.000000  0.000000  1.000000        0.00000            
REMARK 290   SMTRY1   5 -1.000000  0.000000  0.000000        0.00000            
REMARK 290   SMTRY2   5  0.000000  1.000000  0.000000        0.00000            
REMARK 290   SMTRY3   5  0.000000  0.000000 -1.000000        0.00000            
REMARK 290   SMTRY1   6  1.000000  0.000000  0.000000        0.00000            
REMARK 290   SMTRY2   6  0.000000 -1.000000  0.000000        0.00000            
REMARK 290   SMTRY3   6  0.000000  0.000000 -1.000000        0.00000            
REMARK 290   SMTRY1   7  0.000000  1.000000  0.000000        0.00000            
REMARK 290   SMTRY2   7  1.000000  0.000000  0.000000        0.00000            
REMARK 290   SMTRY3   7  0.000000  0.000000 -1.000000        0.00000            
REMARK 290   SMTRY1   8  0.000000 -1.000000  0.000000        0.00000            
REMARK 290   SMTRY2   8 -1.000000  0.000000  0.000000        0.00000            
REMARK 290   SMTRY3   8  0.000000  0.000000 -1.000000        0.00000            
REMARK 290                                                                      
REMARK 290 REMARK: NULL                                                         
REMARK 300                                                                      
REMARK 300 BIOMOLECULE: 1, 2                                                    
REMARK 300 SEE REMARK 350 FOR THE AUTHOR PROVIDED AND/OR PROGRAM                
REMARK 300 GENERATED ASSEMBLY INFORMATION FOR THE STRUCTURE IN                  
REMARK 300 THIS ENTRY. THE REMARK MAY ALSO PROVIDE INFORMATION ON               
REMARK 300 BURIED SURFACE AREA.                                                 
REMARK 350                                                                      
REMARK 350 COORDINATES FOR A COMPLETE MULTIMER REPRESENTING THE KNOWN           
REMARK 350 BIOLOGICALLY SIGNIFICANT OLIGOMERIZATION STATE OF THE                
REMARK 350 MOLECULE CAN BE GENERATED BY APPLYING BIOMT TRANSFORMATIONS          
REMARK 350 GIVEN BELOW.  BOTH NON-CRYSTALLOGRAPHIC AND                          
REMARK 350 CRYSTALLOGRAPHIC OPERATIONS ARE GIVEN.                               
REMARK 350                                                                      
REMARK 350 BIOMOLECULE: 1                                                       
REMARK 350 AUTHOR DETERMINED BIOLOGICAL UNIT: MONOMERIC                         
REMARK 350 APPLY THE FOLLOWING TO CHAINS: A                                     
REMARK 350   BIOMT1   1  1.000000  0.000000  0.000000        0.00000            
REMARK 350   BIOMT2   1  0.000000  1.000000  0.000000        0.00000            
REMARK 350   BIOMT3   1  0.000000  0.000000  1.000000        0.00000            
REMARK 350                                                                      
REMARK 350 BIOMOLECULE: 2                                                       
REMARK 350 AUTHOR DETERMINED BIOLOGICAL UNIT: MONOMERIC                         
REMARK 350 APPLY THE FOLLOWING TO CHAINS: B                                     
REMARK 350   BIOMT1   1  1.000000  0.000000  0.000000        0.00000            
REMARK 350   BIOMT2   1  0.000000  1.000000  0.000000        0.00000            
REMARK 350   BIOMT3   1  0.000000  0.000000  1.000000        0.00000            
REMARK 465                                                                      
REMARK 465 MISSING RESIDUES                                                     
REMARK 465 THE FOLLOWING RESIDUES WERE NOT LOCATED IN THE                       
REMARK 465 EXPERIMENT. (M=MODEL NUMBER; RES=RESIDUE NAME; C=CHAIN               
REMARK 465 IDENTIFIER; SSSEQ=SEQUENCE NUMBER; I=INSERTION CODE.)                
REMARK 465                                                                      
REMARK 465   M RES C SSSEQI                                                     
REMARK 465     MET A   852                                                      
REMARK 465     HIS A   853                                                      
REMARK 465     HIS A   854                                                      
REMARK 465     HIS A   855                                                      
REMARK 465     HIS A   856                                                      
REMARK 465     HIS A   857                                                      
REMARK 465     HIS A   858                                                      
REMARK 465     GLY A   859                                                      
REMARK 465     GLU A   860                                                      
REMARK 465     LEU A   861                                                      
REMARK 465     ASN A  1219                                                      
REMARK 465     ASP A  1220                                                      
REMARK 465     GLN A  1221                                                      
REMARK 465     GLY A  1222                                                      
REMARK 465     ILE A  1223                                                      
REMARK 465     ARG A  1224                                                      
REMARK 465     MET B   852                                                      
REMARK 465     HIS B   853                                                      
REMARK 465     HIS B   854                                                      
REMARK 465     HIS B   855                                                      
REMARK 465     HIS B   856                                                      
REMARK 465     HIS B   857                                                      
REMARK 465     HIS B   858                                                      
REMARK 465     GLY B   859                                                      
REMARK 465     GLU B   860                                                      
REMARK 465     LEU B   861                                                      
REMARK 465     ASN B  1219                                                      
REMARK 465     ASP B  1220                                                      
REMARK 465     GLN B  1221                                                      
REMARK 465     GLY B  1222                                                      
REMARK 465     ILE B  1223                                                      
REMARK 465     ARG B  1224                                                      
REMARK 465     LEU B  1288                                                      
REMARK 470                                                                      
REMARK 470 MISSING ATOM                                                         
REMARK 470 THE FOLLOWING RESIDUES HAVE MISSING ATOMS (M=MODEL NUMBER;           
REMARK 470 RES=RESIDUE NAME; C=CHAIN IDENTIFIER; SSEQ=SEQUENCE NUMBER;          
REMARK 470 I=INSERTION CODE):                                                   
REMARK 470   M RES CSSEQI  ATOMS                                                
REMARK 470     LYS A 862    CG   CD   CE   NZ                                   
REMARK 470     LYS B 862    CG   CD   CE   NZ                                   
REMARK 500                                                                      
REMARK 500 GEOMETRY AND STEREOCHEMISTRY                                         
REMARK 500 SUBTOPIC: CLOSE CONTACTS IN SAME ASYMMETRIC UNIT                     
REMARK 500                                                                      
REMARK 500 THE FOLLOWING ATOMS ARE IN CLOSE CONTACT.                            
REMARK 500                                                                      
REMARK 500  ATM1  RES C  SSEQI   ATM2  RES C  SSEQI           DISTANCE          
REMARK 500   O    HOH B  1615     O    HOH B  1683              2.08            
REMARK 500                                                                      
REMARK 500 REMARK: NULL                                                         
REMARK 500                                                                      
REMARK 500 GEOMETRY AND STEREOCHEMISTRY                                         
REMARK 500 SUBTOPIC: TORSION ANGLES                                             
REMARK 500                                                                      
REMARK 500 TORSION ANGLES OUTSIDE THE EXPECTED RAMACHANDRAN REGIONS:            
REMARK 500 (M=MODEL NUMBER; RES=RESIDUE NAME; C=CHAIN IDENTIFIER;               
REMARK 500 SSEQ=SEQUENCE NUMBER; I=INSERTION CODE).                             
REMARK 500                                                                      
REMARK 500 STANDARD TABLE:                                                      
REMARK 500 FORMAT:(10X,I3,1X,A3,1X,A1,I4,A1,4X,F7.2,3X,F7.2)                    
REMARK 500                                                                      
REMARK 500 EXPECTED VALUES: GJ KLEYWEGT AND TA JONES (1996). PHI/PSI-           
REMARK 500 CHOLOGY: RAMACHANDRAN REVISITED. STRUCTURE 4, 1395 - 1400            
REMARK 500                                                                      
REMARK 500  M RES CSSEQI        PSI       PHI                                   
REMARK 500    ASN A 908       59.03    -92.15                                   
REMARK 500    ILE A 946      -64.42    -94.42                                   
REMARK 500    ASN A 947       70.00     31.87                                   
REMARK 500    ASN A 948       68.95    174.96                                   
REMARK 500    SER A1017      -91.60   -146.03                                   
REMARK 500    LYS A1048      131.28   -176.01                                   
REMARK 500    ASP A1068       52.77    -94.40                                   
REMARK 500    ILE A1140      -53.08   -128.81                                   
REMARK 500    TYR A1157      -77.93   -122.27                                   
REMARK 500    GLN A1211      -10.31   -151.94                                   
REMARK 500    ASN B 908       52.25    -91.58                                   
REMARK 500    SER B1017      -93.84   -142.68                                   
REMARK 500    LYS B1048      132.39   -177.61                                   
REMARK 500    ASP B1068       52.02    -94.39                                   
REMARK 500    ILE B1140      -55.91   -125.89                                   
REMARK 500    TYR B1157      -74.92   -133.25                                   
REMARK 500    ALA B1189      -30.74     83.01                                   
REMARK 500    GLN B1211      -12.36   -158.08                                   
REMARK 500    ASN B1248       38.85     14.29                                   
REMARK 500    ASN B1249       18.38     59.11                                   
REMARK 500    GLN B1262       17.97   -140.56                                   
REMARK 500                                                                      
REMARK 500 REMARK: NULL                                                         
REMARK 800                                                                      
REMARK 800 SITE                                                                 
REMARK 800 SITE_IDENTIFIER: AC1                                                 
REMARK 800 EVIDENCE_CODE: SOFTWARE                                              
REMARK 800 SITE_DESCRIPTION: binding site for residue FMT A 1301                
REMARK 800                                                                      
REMARK 800 SITE_IDENTIFIER: AC2                                                 
REMARK 800 EVIDENCE_CODE: SOFTWARE                                              
REMARK 800 SITE_DESCRIPTION: binding site for residue FMT A 1302                
REMARK 800                                                                      
REMARK 800 SITE_IDENTIFIER: AC3                                                 
REMARK 800 EVIDENCE_CODE: SOFTWARE                                              
REMARK 800 SITE_DESCRIPTION: binding site for residue FMT A 1303                
REMARK 800                                                                      
REMARK 800 SITE_IDENTIFIER: AC4                                                 
REMARK 800 EVIDENCE_CODE: SOFTWARE                                              
REMARK 800 SITE_DESCRIPTION: binding site for residue FMT A 1304                
REMARK 800                                                                      
REMARK 800 SITE_IDENTIFIER: AC5                                                 
REMARK 800 EVIDENCE_CODE: SOFTWARE                                              
REMARK 800 SITE_DESCRIPTION: binding site for residue FMT A 1305                
REMARK 800                                                                      
REMARK 800 SITE_IDENTIFIER: AC6                                                 
REMARK 800 EVIDENCE_CODE: SOFTWARE                                              
REMARK 800 SITE_DESCRIPTION: binding site for residue FMT A 1306                
REMARK 800                                                                      
REMARK 800 SITE_IDENTIFIER: AC7                                                 
REMARK 800 EVIDENCE_CODE: SOFTWARE                                              
REMARK 800 SITE_DESCRIPTION: binding site for residue CL A 1307                 
REMARK 800                                                                      
REMARK 800 SITE_IDENTIFIER: AC8                                                 
REMARK 800 EVIDENCE_CODE: SOFTWARE                                              
REMARK 800 SITE_DESCRIPTION: binding site for residue CL A 1308                 
REMARK 800                                                                      
REMARK 800 SITE_IDENTIFIER: AC9                                                 
REMARK 800 EVIDENCE_CODE: SOFTWARE                                              
REMARK 800 SITE_DESCRIPTION: binding site for residue FMT B 1301                
REMARK 800                                                                      
REMARK 800 SITE_IDENTIFIER: AD1                                                 
REMARK 800 EVIDENCE_CODE: SOFTWARE                                              
REMARK 800 SITE_DESCRIPTION: binding site for residue FMT B 1302                
REMARK 800                                                                      
REMARK 800 SITE_IDENTIFIER: AD2                                                 
REMARK 800 EVIDENCE_CODE: SOFTWARE                                              
REMARK 800 SITE_DESCRIPTION: binding site for residue FMT B 1303                
REMARK 800                                                                      
REMARK 800 SITE_IDENTIFIER: AD3                                                 
REMARK 800 EVIDENCE_CODE: SOFTWARE                                              
REMARK 800 SITE_DESCRIPTION: binding site for residue FMT B 1304                
REMARK 800                                                                      
REMARK 800 SITE_IDENTIFIER: AD4                                                 
REMARK 800 EVIDENCE_CODE: SOFTWARE                                              
REMARK 800 SITE_DESCRIPTION: binding site for residue FMT B 1305                
REMARK 800                                                                      
REMARK 800 SITE_IDENTIFIER: AD5                                                 
REMARK 800 EVIDENCE_CODE: SOFTWARE                                              
REMARK 800 SITE_DESCRIPTION: binding site for residue CL B 1306                 
REMARK 800                                                                      
REMARK 800 SITE_IDENTIFIER: AD6                                                 
REMARK 800 EVIDENCE_CODE: SOFTWARE                                              
REMARK 800 SITE_DESCRIPTION: binding site for residue CL B 1307                 
DBREF  5MK8 A  852  1288  PDB    5MK8     5MK8           852   1288             
DBREF  5MK8 B  852  1288  PDB    5MK8     5MK8           852   1288             
SEQRES   1 A  437  MET HIS HIS HIS HIS HIS HIS GLY GLU LEU LYS TYR ASN          
SEQRES   2 A  437  CYS ILE LEU ASN ILE LYS TYR GLU MET ASP ARG ASP LYS          
SEQRES   3 A  437  LEU VAL ASP SER SER GLY TYR ARG SER ARG ILE ASN ILE          
SEQRES   4 A  437  GLY THR GLY VAL LYS PHE SER GLU ILE ASP LYS ASN GLN          
SEQRES   5 A  437  VAL GLN LEU SER ASN LEU GLU SER SER LYS ILE GLU VAL          
SEQRES   6 A  437  ILE LEU ASN ASN GLY VAL ILE TYR ASN SER MET TYR GLU          
SEQRES   7 A  437  ASN PHE SER THR SER PHE TRP ILE ARG ILE PRO LYS TYR          
SEQRES   8 A  437  PHE ARG ASN ILE ASN ASN GLU TYR LYS ILE ILE SER CYS          
SEQRES   9 A  437  MET GLN ASN ASN SER GLY TRP GLU VAL SER LEU ASN PHE          
SEQRES  10 A  437  SER ASN MET ASN SER LYS ILE ILE TRP THR LEU GLN ASP          
SEQRES  11 A  437  THR GLU GLY ILE LYS LYS THR VAL VAL PHE GLN TYR THR          
SEQRES  12 A  437  GLN ASN ILE ASN ILE SER ASP TYR ILE ASN ARG TRP ILE          
SEQRES  13 A  437  PHE VAL THR ILE THR ASN ASN ARG LEU SER ASN SER LYS          
SEQRES  14 A  437  ILE TYR ILE ASN GLY ARG LEU ILE ASN GLU GLU SER ILE          
SEQRES  15 A  437  SER ASP LEU GLY ASN ILE HIS ALA SER ASN ASN ILE MET          
SEQRES  16 A  437  PHE LYS LEU ASP GLY CYS ARG ASP PRO HIS ARG TYR ILE          
SEQRES  17 A  437  TRP ILE LYS TYR PHE ASN LEU PHE ASP LYS GLU LEU ASN          
SEQRES  18 A  437  LYS LYS GLU ILE LYS ASP LEU TYR ASP ASN GLN SER ASN          
SEQRES  19 A  437  SER GLY ILE LEU LYS ASP PHE TRP GLY ASP TYR LEU GLN          
SEQRES  20 A  437  TYR ASP LYS PRO TYR TYR MET LEU ASN LEU TYR ASP PRO          
SEQRES  21 A  437  ASN LYS TYR LEU ASP VAL ASN ASN VAL GLY ILE ARG GLY          
SEQRES  22 A  437  TYR MET TYR LEU LYS GLY PRO ARG GLY ARG ILE VAL THR          
SEQRES  23 A  437  THR ASN ILE TYR LEU ASN SER THR LEU TYR MET GLY THR          
SEQRES  24 A  437  LYS PHE ILE ILE LYS LYS TYR ALA SER GLY ASN LYS ASP          
SEQRES  25 A  437  ASN ILE VAL ARG ASN ASN ASP ARG VAL TYR ILE ASN VAL          
SEQRES  26 A  437  VAL VAL LYS ASN LYS GLU TYR ARG LEU ALA THR ASN ALA          
SEQRES  27 A  437  SER GLN ALA GLY VAL GLU LYS ILE LEU SER ALA VAL GLU          
SEQRES  28 A  437  ILE PRO ASP VAL GLY ASN LEU SER GLN VAL VAL VAL MET          
SEQRES  29 A  437  LYS SER GLU ASN ASP GLN GLY ILE ARG ASN LYS CYS LYS          
SEQRES  30 A  437  MET ASN LEU GLN ASP ASN ASN GLY ASN ASP ILE GLY PHE          
SEQRES  31 A  437  ILE GLY PHE HIS GLN PHE ASN ASN ILE ALA LYS LEU VAL          
SEQRES  32 A  437  ALA SER ASN TRP TYR ASN ARG GLN ILE GLY LYS ALA SER          
SEQRES  33 A  437  ARG THR PHE GLY CYS SER TRP GLU PHE ILE PRO VAL ASP          
SEQRES  34 A  437  ASP GLY TRP GLY GLU SER SER LEU                              
SEQRES   1 B  437  MET HIS HIS HIS HIS HIS HIS GLY GLU LEU LYS TYR ASN          
SEQRES   2 B  437  CYS ILE LEU ASN ILE LYS TYR GLU MET ASP ARG ASP LYS          
SEQRES   3 B  437  LEU VAL ASP SER SER GLY TYR ARG SER ARG ILE ASN ILE          
SEQRES   4 B  437  GLY THR GLY VAL LYS PHE SER GLU ILE ASP LYS ASN GLN          
SEQRES   5 B  437  VAL GLN LEU SER ASN LEU GLU SER SER LYS ILE GLU VAL          
SEQRES   6 B  437  ILE LEU ASN ASN GLY VAL ILE TYR ASN SER MET TYR GLU          
SEQRES   7 B  437  ASN PHE SER THR SER PHE TRP ILE ARG ILE PRO LYS TYR          
SEQRES   8 B  437  PHE ARG ASN ILE ASN ASN GLU TYR LYS ILE ILE SER CYS          
SEQRES   9 B  437  MET GLN ASN ASN SER GLY TRP GLU VAL SER LEU ASN PHE          
SEQRES  10 B  437  SER ASN MET ASN SER LYS ILE ILE TRP THR LEU GLN ASP          
SEQRES  11 B  437  THR GLU GLY ILE LYS LYS THR VAL VAL PHE GLN TYR THR          
SEQRES  12 B  437  GLN ASN ILE ASN ILE SER ASP TYR ILE ASN ARG TRP ILE          
SEQRES  13 B  437  PHE VAL THR ILE THR ASN ASN ARG LEU SER ASN SER LYS          
SEQRES  14 B  437  ILE TYR ILE ASN GLY ARG LEU ILE ASN GLU GLU SER ILE          
SEQRES  15 B  437  SER ASP LEU GLY ASN ILE HIS ALA SER ASN ASN ILE MET          
SEQRES  16 B  437  PHE LYS LEU ASP GLY CYS ARG ASP PRO HIS ARG TYR ILE          
SEQRES  17 B  437  TRP ILE LYS TYR PHE ASN LEU PHE ASP LYS GLU LEU ASN          
SEQRES  18 B  437  LYS LYS GLU ILE LYS ASP LEU TYR ASP ASN GLN SER ASN          
SEQRES  19 B  437  SER GLY ILE LEU LYS ASP PHE TRP GLY ASP TYR LEU GLN          
SEQRES  20 B  437  TYR ASP LYS PRO TYR TYR MET LEU ASN LEU TYR ASP PRO          
SEQRES  21 B  437  ASN LYS TYR LEU ASP VAL ASN ASN VAL GLY ILE ARG GLY          
SEQRES  22 B  437  TYR MET TYR LEU LYS GLY PRO ARG GLY ARG ILE VAL THR          
SEQRES  23 B  437  THR ASN ILE TYR LEU ASN SER THR LEU TYR MET GLY THR          
SEQRES  24 B  437  LYS PHE ILE ILE LYS LYS TYR ALA SER GLY ASN LYS ASP          
SEQRES  25 B  437  ASN ILE VAL ARG ASN ASN ASP ARG VAL TYR ILE ASN VAL          
SEQRES  26 B  437  VAL VAL LYS ASN LYS GLU TYR ARG LEU ALA THR ASN ALA          
SEQRES  27 B  437  SER GLN ALA GLY VAL GLU LYS ILE LEU SER ALA VAL GLU          
SEQRES  28 B  437  ILE PRO ASP VAL GLY ASN LEU SER GLN VAL VAL VAL MET          
SEQRES  29 B  437  LYS SER GLU ASN ASP GLN GLY ILE ARG ASN LYS CYS LYS          
SEQRES  30 B  437  MET ASN LEU GLN ASP ASN ASN GLY ASN ASP ILE GLY PHE          
SEQRES  31 B  437  ILE GLY PHE HIS GLN PHE ASN ASN ILE ALA LYS LEU VAL          
SEQRES  32 B  437  ALA SER ASN TRP TYR ASN ARG GLN ILE GLY LYS ALA SER          
SEQRES  33 B  437  ARG THR PHE GLY CYS SER TRP GLU PHE ILE PRO VAL ASP          
SEQRES  34 B  437  ASP GLY TRP GLY GLU SER SER LEU                              
HET    FMT  A1301       3                                                       
HET    FMT  A1302       3                                                       
HET    FMT  A1303       3                                                       
HET    FMT  A1304       3                                                       
HET    FMT  A1305       3                                                       
HET    FMT  A1306       3                                                       
HET     CL  A1307       1                                                       
HET     CL  A1308       1                                                       
HET    FMT  B1301       3                                                       
HET    FMT  B1302       3                                                       
HET    FMT  B1303       3                                                       
HET    FMT  B1304       3                                                       
HET    FMT  B1305       3                                                       
HET     CL  B1306       1                                                       
HET     CL  B1307       1                                                       
HETNAM     FMT FORMIC ACID                                                      
HETNAM      CL CHLORIDE ION                                                     
FORMUL   3  FMT    11(C H2 O2)                                                  
FORMUL   9   CL    4(CL 1-)                                                     
FORMUL  18  HOH   *609(H2 O)                                                    
HELIX    1 AA1 ASN A  919  ILE A  923  5                                   5    
HELIX    2 AA2 ASN A 1072  GLN A 1083  1                                  12    
HELIX    3 AA3 GLU A 1202  VAL A 1206  5                                   5    
HELIX    4 AA4 ASN A 1257  ILE A 1263  1                                   7    
HELIX    5 AA5 ASN B  919  ILE B  923  5                                   5    
HELIX    6 AA6 ASN B 1072  SER B 1084  1                                  13    
HELIX    7 AA7 GLU B 1202  VAL B 1206  5                                   5    
HELIX    8 AA8 TYR B 1259  ILE B 1263  5                                   5    
SHEET    1 AA1 5 LYS A 877  ASP A 880  0                                        
SHEET    2 AA1 5 CYS A 865  GLU A 872 -1  N  LYS A 870   O  VAL A 879           
SHEET    3 AA1 5 TYR A1058  PHE A1067 -1  O  PHE A1064   N  ILE A 869           
SHEET    4 AA1 5 VAL A 904  SER A 907 -1  N  VAL A 904   O  ILE A1061           
SHEET    5 AA1 5 LYS A 895  PHE A 896 -1  N  LYS A 895   O  GLN A 905           
SHEET    1 AA2 7 LYS A 877  ASP A 880  0                                        
SHEET    2 AA2 7 CYS A 865  GLU A 872 -1  N  LYS A 870   O  VAL A 879           
SHEET    3 AA2 7 TYR A1058  PHE A1067 -1  O  PHE A1064   N  ILE A 869           
SHEET    4 AA2 7 PHE A 931  ARG A 938 -1  N  SER A 934   O  ASN A1065           
SHEET    5 AA2 7 ILE A1007  ASN A1013 -1  O  VAL A1009   N  PHE A 935           
SHEET    6 AA2 7 ASN A1018  ILE A1023 -1  O  TYR A1022   N  THR A1010           
SHEET    7 AA2 7 ARG A1026  SER A1032 -1  O  GLU A1031   N  SER A1019           
SHEET    1 AA3 7 ARG A 887  ILE A 890  0                                        
SHEET    2 AA3 7 ILE A 914  ILE A 917 -1  O  GLU A 915   N  ASN A 889           
SHEET    3 AA3 7 ASN A1044  ASP A1050 -1  O  PHE A1047   N  ILE A 914           
SHEET    4 AA3 7 TYR A 950  GLN A 957 -1  N  SER A 954   O  MET A1046           
SHEET    5 AA3 7 SER A 960  SER A 969 -1  O  VAL A 964   N  ILE A 953           
SHEET    6 AA3 7 ASN A 972  GLN A 980 -1  O  ILE A 976   N  SER A 965           
SHEET    7 AA3 7 LYS A 986  THR A 994 -1  O  PHE A 991   N  ILE A 975           
SHEET    1 AA4 2 ASN A 925  SER A 926  0                                        
SHEET    2 AA4 2 ILE A1039  HIS A1040 -1  O  ILE A1039   N  SER A 926           
SHEET    1 AA5 9 TYR A1114  VAL A1117  0                                        
SHEET    2 AA5 9 MET A1126  LYS A1129 -1  O  LYS A1129   N  TYR A1114           
SHEET    3 AA5 9 ILE A1250  SER A1256 -1  O  LEU A1253   N  MET A1126           
SHEET    4 AA5 9 ASP A1238  PHE A1247 -1  N  GLY A1243   O  VAL A1254           
SHEET    5 AA5 9 MET A1229  GLN A1232 -1  N  LEU A1231   O  ILE A1239           
SHEET    6 AA5 9 VAL A1212  MET A1215 -1  N  VAL A1212   O  GLN A1232           
SHEET    7 AA5 9 ARG A1171  VAL A1178 -1  N  VAL A1172   O  VAL A1213           
SHEET    8 AA5 9 LYS A1181  ALA A1186 -1  O  LYS A1181   N  VAL A1178           
SHEET    9 AA5 9 SER A1199  VAL A1201 -1  O  VAL A1201   N  ARG A1184           
SHEET    1 AA6 9 LYS A1196  ILE A1197  0                                        
SHEET    2 AA6 9 ILE A1250  SER A1256 -1  O  ALA A1255   N  LYS A1196           
SHEET    3 AA6 9 ASP A1238  PHE A1247 -1  N  GLY A1243   O  VAL A1254           
SHEET    4 AA6 9 MET A1229  GLN A1232 -1  N  LEU A1231   O  ILE A1239           
SHEET    5 AA6 9 VAL A1212  MET A1215 -1  N  VAL A1212   O  GLN A1232           
SHEET    6 AA6 9 ARG A1171  VAL A1178 -1  N  VAL A1172   O  VAL A1213           
SHEET    7 AA6 9 LYS A1151  LYS A1156 -1  N  LYS A1155   O  TYR A1173           
SHEET    8 AA6 9 PRO A1102  ASN A1107 -1  N  TYR A1103   O  PHE A1152           
SHEET    9 AA6 9 TRP A1274  ILE A1277 -1  O  ILE A1277   N  TYR A1104           
SHEET    1 AA7 2 ARG A1134  THR A1137  0                                        
SHEET    2 AA7 2 TYR A1141  SER A1144 -1  O  ASN A1143   N  ILE A1135           
SHEET    1 AA8 5 LYS B 877  ASP B 880  0                                        
SHEET    2 AA8 5 CYS B 865  GLU B 872 -1  N  LYS B 870   O  VAL B 879           
SHEET    3 AA8 5 TYR B1058  PHE B1067 -1  O  PHE B1064   N  ILE B 869           
SHEET    4 AA8 5 VAL B 904  SER B 907 -1  N  VAL B 904   O  ILE B1061           
SHEET    5 AA8 5 LYS B 895  PHE B 896 -1  N  LYS B 895   O  GLN B 905           
SHEET    1 AA9 7 LYS B 877  ASP B 880  0                                        
SHEET    2 AA9 7 CYS B 865  GLU B 872 -1  N  LYS B 870   O  VAL B 879           
SHEET    3 AA9 7 TYR B1058  PHE B1067 -1  O  PHE B1064   N  ILE B 869           
SHEET    4 AA9 7 PHE B 931  ARG B 938 -1  N  SER B 934   O  ASN B1065           
SHEET    5 AA9 7 ILE B1007  ASN B1013 -1  O  VAL B1009   N  PHE B 935           
SHEET    6 AA9 7 ASN B1018  ILE B1023 -1  O  TYR B1022   N  THR B1010           
SHEET    7 AA9 7 ARG B1026  SER B1032 -1  O  GLU B1031   N  SER B1019           
SHEET    1 AB1 7 ARG B 887  ILE B 890  0                                        
SHEET    2 AB1 7 ILE B 914  ILE B 917 -1  O  GLU B 915   N  ASN B 889           
SHEET    3 AB1 7 ASN B1044  ASP B1050 -1  O  PHE B1047   N  ILE B 914           
SHEET    4 AB1 7 TYR B 950  GLN B 957 -1  N  SER B 954   O  MET B1046           
SHEET    5 AB1 7 SER B 960  SER B 969 -1  O  VAL B 964   N  ILE B 953           
SHEET    6 AB1 7 ASN B 972  GLN B 980 -1  O  ILE B 976   N  SER B 965           
SHEET    7 AB1 7 LYS B 986  THR B 994 -1  O  VAL B 989   N  TRP B 977           
SHEET    1 AB2 2 ASN B 925  SER B 926  0                                        
SHEET    2 AB2 2 ILE B1039  HIS B1040 -1  O  ILE B1039   N  SER B 926           
SHEET    1 AB3 9 TYR B1114  VAL B1117  0                                        
SHEET    2 AB3 9 MET B1126  LYS B1129 -1  O  LYS B1129   N  TYR B1114           
SHEET    3 AB3 9 ILE B1250  SER B1256 -1  O  ALA B1251   N  LEU B1128           
SHEET    4 AB3 9 ASP B1238  PHE B1247 -1  N  PHE B1247   O  ILE B1250           
SHEET    5 AB3 9 MET B1229  GLN B1232 -1  N  LEU B1231   O  ILE B1239           
SHEET    6 AB3 9 VAL B1212  MET B1215 -1  N  VAL B1214   O  ASN B1230           
SHEET    7 AB3 9 ARG B1171  VAL B1178 -1  N  VAL B1172   O  VAL B1213           
SHEET    8 AB3 9 LYS B1181  ALA B1186 -1  O  LYS B1181   N  VAL B1178           
SHEET    9 AB3 9 SER B1199  VAL B1201 -1  O  VAL B1201   N  ARG B1184           
SHEET    1 AB4 9 LYS B1196  ILE B1197  0                                        
SHEET    2 AB4 9 ILE B1250  SER B1256 -1  O  ALA B1255   N  LYS B1196           
SHEET    3 AB4 9 ASP B1238  PHE B1247 -1  N  PHE B1247   O  ILE B1250           
SHEET    4 AB4 9 MET B1229  GLN B1232 -1  N  LEU B1231   O  ILE B1239           
SHEET    5 AB4 9 VAL B1212  MET B1215 -1  N  VAL B1214   O  ASN B1230           
SHEET    6 AB4 9 ARG B1171  VAL B1178 -1  N  VAL B1172   O  VAL B1213           
SHEET    7 AB4 9 PHE B1152  LYS B1156 -1  N  ILE B1153   O  ASN B1175           
SHEET    8 AB4 9 PRO B1102  ASN B1107 -1  N  TYR B1103   O  PHE B1152           
SHEET    9 AB4 9 TRP B1274  ILE B1277 -1  O  ILE B1277   N  TYR B1104           
SHEET    1 AB5 2 ARG B1134  THR B1137  0                                        
SHEET    2 AB5 2 TYR B1141  SER B1144 -1  O  ASN B1143   N  ILE B1135           
SSBOND   1 CYS A 1227    CYS A 1272                          1555   1555  2.07  
SSBOND   2 CYS B 1227    CYS B 1272                          1555   1555  2.05  
CISPEP   1 GLY A 1130    PRO A 1131          0         4.46                     
CISPEP   2 GLY B 1130    PRO B 1131          0        -0.72                     
SITE     1 AC1  3 LYS A1090  GLY A1094  HOH A1431                               
SITE     1 AC2  8 SER A 897  ILE A 899  GLN A 903  ASP A1095                    
SITE     2 AC2  8 TYR A1096  FMT A1303  HOH A1401  HOH A1454                    
SITE     1 AC3  7 ASP A 900  GLN A 903  LYS A1062  GLY A1094                    
SITE     2 AC3  7 TYR A1096  FMT A1302  HOH A1618                               
SITE     1 AC4  4 LYS A1062  TYR A1063  PHE A1064  HOH A1426                    
SITE     1 AC5  7 SER A 954  CYS A 955  MET A 956  SER A1042                    
SITE     2 AC5  7 ASN A1044  HOH A1434  HOH A1553                               
SITE     1 AC6  3 ARG A 875  ASP A 880  HOH A1443                               
SITE     1 AC7  2 ASN A 930  GLU A1070                                          
SITE     1 AC8  3 LEU A1089  LYS A1090  LYS A1228                               
SITE     1 AC9  6 GLN B 903  ASP B1095  TYR B1096  HOH B1403                    
SITE     2 AC9  6 HOH B1442  HOH B1470                                          
SITE     1 AD1  4 SER B1017  ASN B1018  SER B1032  SER B1034                    
SITE     1 AD2  5 MET B 927  ARG B1015  SER B1034  LEU B1036                    
SITE     2 AD2  5 HOH B1489                                                     
SITE     1 AD3  5 ARG B 885  TYR B1259  ARG B1268  PHE B1270                    
SITE     2 AD3  5 GLY B1271                                                     
SITE     1 AD4  4 LYS B1062  TYR B1063  PHE B1064  HOH B1459                    
SITE     1 AD5  3 ASN B 930  GLU B1070  HOH B1689                               
SITE     1 AD6  2 LEU B1089  LYS B1090                                          
CRYST1  118.009  118.009  173.826  90.00  90.00  90.00 P 4 2 2      16          
ORIGX1      1.000000  0.000000  0.000000        0.00000                         
ORIGX2      0.000000  1.000000  0.000000        0.00000                         
ORIGX3      0.000000  0.000000  1.000000        0.00000                         
SCALE1      0.008474  0.000000  0.000000        0.00000                         
SCALE2      0.000000  0.008474  0.000000        0.00000                         
SCALE3      0.000000  0.000000  0.005753        0.00000                         
ATOM      1  N   LYS A 862      68.173  34.388  18.882  1.00 47.79           N  
ATOM      2  CA  LYS A 862      67.904  35.814  19.017  1.00 45.64           C  
ATOM      3  C   LYS A 862      67.771  36.209  20.490  1.00 44.15           C  
ATOM      4  O   LYS A 862      67.711  35.343  21.367  1.00 48.16           O  
ATOM      5  CB  LYS A 862      66.637  36.196  18.241  1.00 51.73           C  
ATOM      6  N   TYR A 863      67.756  37.521  20.749  1.00 46.04           N  
ATOM      7  CA  TYR A 863      67.547  38.110  22.072  1.00 42.13           C  
ATOM      8  C   TYR A 863      68.683  37.839  23.058  1.00 41.55           C  
ATOM      9  O   TYR A 863      68.457  37.912  24.275  1.00 34.39           O  
ATOM     10  CB  TYR A 863      66.246  37.627  22.729  1.00 43.53           C  
ATOM     11  CG  TYR A 863      64.995  37.641  21.888  1.00 42.21           C  
ATOM     12  CD1 TYR A 863      64.858  38.479  20.790  1.00 43.95           C  
ATOM     13  CD2 TYR A 863      63.940  36.797  22.200  1.00 40.06           C  
ATOM     14  CE1 TYR A 863      63.693  38.471  20.027  1.00 47.80           C  
ATOM     15  CE2 TYR A 863      62.786  36.779  21.456  1.00 43.07           C  
ATOM     16  CZ  TYR A 863      62.664  37.613  20.371  1.00 49.05           C  
ATOM     17  OH  TYR A 863      61.498  37.582  19.638  1.00 57.29           O  
ATOM     18  N   ASN A 864      69.893  37.504  22.602  1.00 38.99           N  
ATOM     19  CA  ASN A 864      70.978  37.209  23.535  1.00 27.97           C  
ATOM     20  C   ASN A 864      70.626  36.003  24.409  1.00 26.89           C  
ATOM     21  O   ASN A 864      70.762  36.029  25.630  1.00 27.25           O  
ATOM     22  CB  ASN A 864      71.286  38.424  24.413  1.00 36.79           C  
ATOM     23  CG  ASN A 864      71.850  39.592  23.644  1.00 40.22           C  
ATOM     24  OD1 ASN A 864      71.373  39.947  22.565  1.00 44.90           O  
ATOM     25  ND2 ASN A 864      72.871  40.211  24.212  1.00 44.40           N  
ATOM     26  N   CYS A 865      70.149  34.944  23.774  1.00 27.00           N  
ATOM     27  CA  CYS A 865      69.780  33.740  24.503  1.00 23.95           C  
ATOM     28  C   CYS A 865      71.031  32.985  24.946  1.00 21.89           C  
ATOM     29  O   CYS A 865      71.894  32.670  24.126  1.00 24.51           O  
ATOM     30  CB  CYS A 865      68.910  32.857  23.613  1.00 24.68           C  
ATOM     31  SG  CYS A 865      68.375  31.363  24.416  1.00 28.82           S  
ATOM     32  N   ILE A 866      71.134  32.681  26.241  1.00 20.52           N  
ATOM     33  CA  ILE A 866      72.287  31.955  26.777  1.00 20.48           C  
ATOM     34  C   ILE A 866      71.921  30.581  27.312  1.00 18.73           C  
ATOM     35  O   ILE A 866      72.796  29.871  27.836  1.00 19.66           O  
ATOM     36  CB  ILE A 866      73.013  32.770  27.865  1.00 18.35           C  
ATOM     37  CG1 ILE A 866      72.027  33.167  28.965  1.00 21.96           C  
ATOM     38  CG2 ILE A 866      73.667  33.993  27.253  1.00 25.02           C  
ATOM     39  CD1 ILE A 866      72.680  33.645  30.226  1.00 25.70           C  
ATOM     40  N   LEU A 867      70.663  30.177  27.190  1.00 18.93           N  
ATOM     41  CA  LEU A 867      70.206  28.843  27.562  1.00 17.33           C  
ATOM     42  C   LEU A 867      68.820  28.665  26.965  1.00 18.12           C  
ATOM     43  O   LEU A 867      67.959  29.525  27.156  1.00 18.16           O  
ATOM     44  CB  LEU A 867      70.159  28.648  29.081  1.00 18.94           C  
ATOM     45  CG  LEU A 867      69.515  27.330  29.553  1.00 21.21           C  
ATOM     46  CD1 LEU A 867      70.348  26.097  29.161  1.00 19.62           C  
ATOM     47  CD2 LEU A 867      69.216  27.333  31.054  1.00 22.03           C  
ATOM     48  N   ASN A 868      68.607  27.581  26.223  1.00 22.44           N  
ATOM     49  CA  ASN A 868      67.338  27.322  25.536  1.00 21.67           C  
ATOM     50  C   ASN A 868      67.068  25.825  25.644  1.00 24.89           C  
ATOM     51  O   ASN A 868      67.588  25.039  24.847  1.00 23.19           O  
ATOM     52  CB  ASN A 868      67.403  27.777  24.081  1.00 27.59           C  
ATOM     53  CG  ASN A 868      66.056  27.671  23.350  1.00 31.80           C  
ATOM     54  OD1 ASN A 868      65.089  27.106  23.854  1.00 30.62           O  
ATOM     55  ND2 ASN A 868      66.009  28.215  22.147  1.00 35.08           N  
ATOM     56  N   ILE A 869      66.261  25.435  26.625  1.00 19.69           N  
ATOM     57  CA  ILE A 869      66.004  24.023  26.879  1.00 22.20           C  
ATOM     58  C   ILE A 869      64.892  23.552  25.949  1.00 23.70           C  
ATOM     59  O   ILE A 869      63.761  24.044  26.024  1.00 21.10           O  
ATOM     60  CB  ILE A 869      65.643  23.779  28.348  1.00 22.18           C  
ATOM     61  CG1 ILE A 869      66.789  24.242  29.249  1.00 22.60           C  
ATOM     62  CG2 ILE A 869      65.321  22.312  28.567  1.00 22.04           C  
ATOM     63  CD1 ILE A 869      66.605  23.930  30.710  1.00 20.93           C  
ATOM     64  N   LYS A 870      65.216  22.595  25.078  1.00 22.81           N  
ATOM     65  CA  LYS A 870      64.327  22.152  24.009  1.00 22.00           C  
ATOM     66  C   LYS A 870      64.538  20.658  23.783  1.00 30.71           C  
ATOM     67  O   LYS A 870      65.673  20.174  23.819  1.00 25.74           O  
ATOM     68  CB  LYS A 870      64.606  22.931  22.710  1.00 30.21           C  
ATOM     69  CG  LYS A 870      63.384  23.300  21.879  1.00 37.06           C  
ATOM     70  CD  LYS A 870      63.573  24.624  21.134  1.00 44.55           C  
ATOM     71  CE  LYS A 870      62.711  25.737  21.761  1.00 49.53           C  
ATOM     72  NZ  LYS A 870      62.891  27.099  21.144  1.00 47.23           N  
ATOM     73  N   TYR A 871      63.444  19.928  23.562  1.00 25.75           N  
ATOM     74  CA  TYR A 871      63.572  18.519  23.219  1.00 24.87           C  
ATOM     75  C   TYR A 871      64.273  18.370  21.873  1.00 23.44           C  
ATOM     76  O   TYR A 871      64.000  19.110  20.927  1.00 26.95           O  
ATOM     77  CB  TYR A 871      62.198  17.845  23.174  1.00 28.88           C  
ATOM     78  CG  TYR A 871      62.253  16.419  22.669  1.00 27.37           C  
ATOM     79  CD1 TYR A 871      62.603  15.381  23.517  1.00 25.08           C  
ATOM     80  CD2 TYR A 871      61.986  16.119  21.338  1.00 31.13           C  
ATOM     81  CE1 TYR A 871      62.675  14.073  23.063  1.00 33.51           C  
ATOM     82  CE2 TYR A 871      62.055  14.799  20.869  1.00 30.56           C  
ATOM     83  CZ  TYR A 871      62.401  13.789  21.737  1.00 32.39           C  
ATOM     84  OH  TYR A 871      62.473  12.480  21.292  1.00 36.05           O  
ATOM     85  N   GLU A 872      65.182  17.400  21.789  1.00 29.01           N  
ATOM     86  CA  GLU A 872      65.874  17.084  20.544  1.00 34.07           C  
ATOM     87  C   GLU A 872      65.625  15.623  20.181  1.00 32.51           C  
ATOM     88  O   GLU A 872      65.895  14.726  20.983  1.00 31.37           O  
ATOM     89  CB  GLU A 872      67.380  17.345  20.660  1.00 31.62           C  
ATOM     90  CG  GLU A 872      68.138  17.208  19.342  1.00 37.17           C  
ATOM     91  CD  GLU A 872      69.635  17.085  19.553  1.00 38.79           C  
ATOM     92  OE1 GLU A 872      70.104  15.955  19.809  1.00 40.20           O  
ATOM     93  OE2 GLU A 872      70.338  18.118  19.489  1.00 38.86           O  
ATOM     94  N   MET A 873      65.142  15.392  18.959  1.00 36.45           N  
ATOM     95  CA  MET A 873      64.786  14.038  18.544  1.00 37.25           C  
ATOM     96  C   MET A 873      66.011  13.131  18.462  1.00 38.35           C  
ATOM     97  O   MET A 873      65.972  11.988  18.929  1.00 42.94           O  
ATOM     98  CB  MET A 873      64.061  14.090  17.201  1.00 40.17           C  
ATOM     99  CG  MET A 873      63.192  12.880  16.915  1.00 52.62           C  
ATOM    100  SD  MET A 873      62.382  13.038  15.315  1.00 66.20           S  
ATOM    101  CE  MET A 873      63.808  13.094  14.227  1.00 52.37           C  
ATOM    102  N   ASP A 874      67.113  13.630  17.895  1.00 41.46           N  
ATOM    103  CA  ASP A 874      68.296  12.801  17.675  1.00 40.61           C  
ATOM    104  C   ASP A 874      68.808  12.202  18.983  1.00 44.21           C  
ATOM    105  O   ASP A 874      68.953  10.981  19.109  1.00 44.52           O  
ATOM    106  CB  ASP A 874      69.389  13.622  16.980  1.00 48.31           C  
ATOM    107  CG  ASP A 874      70.706  12.864  16.850  1.00 57.85           C  
ATOM    108  OD1 ASP A 874      70.836  12.050  15.908  1.00 67.61           O  
ATOM    109  OD2 ASP A 874      71.630  13.087  17.666  1.00 57.30           O  
ATOM    110  N   ARG A 875      69.086  13.043  19.976  1.00 38.49           N  
ATOM    111  CA  ARG A 875      69.507  12.501  21.262  1.00 35.43           C  
ATOM    112  C   ARG A 875      68.339  12.048  22.132  1.00 28.34           C  
ATOM    113  O   ARG A 875      68.575  11.432  23.177  1.00 30.87           O  
ATOM    114  CB  ARG A 875      70.361  13.526  22.011  1.00 35.08           C  
ATOM    115  CG  ARG A 875      71.836  13.474  21.632  1.00 38.13           C  
ATOM    116  CD  ARG A 875      72.625  14.584  22.294  1.00 32.40           C  
ATOM    117  NE  ARG A 875      72.273  15.881  21.731  1.00 38.19           N  
ATOM    118  CZ  ARG A 875      72.820  17.029  22.112  1.00 40.50           C  
ATOM    119  NH1 ARG A 875      73.744  17.038  23.065  1.00 39.91           N  
ATOM    120  NH2 ARG A 875      72.447  18.166  21.538  1.00 35.33           N  
ATOM    121  N   ASP A 876      67.100  12.328  21.721  1.00 35.23           N  
ATOM    122  CA  ASP A 876      65.882  11.917  22.433  1.00 32.94           C  
ATOM    123  C   ASP A 876      65.886  12.375  23.893  1.00 35.44           C  
ATOM    124  O   ASP A 876      65.596  11.610  24.815  1.00 31.65           O  
ATOM    125  CB  ASP A 876      65.667  10.403  22.339  1.00 42.38           C  
ATOM    126  CG  ASP A 876      64.293   9.974  22.855  1.00 42.05           C  
ATOM    127  OD1 ASP A 876      63.301  10.690  22.580  1.00 40.67           O  
ATOM    128  OD2 ASP A 876      64.211   8.934  23.548  1.00 43.93           O  
ATOM    129  N   LYS A 877      66.196  13.653  24.101  1.00 29.41           N  
ATOM    130  CA  LYS A 877      66.169  14.213  25.444  1.00 27.15           C  
ATOM    131  C   LYS A 877      66.118  15.729  25.336  1.00 25.38           C  
ATOM    132  O   LYS A 877      66.324  16.307  24.266  1.00 25.15           O  
ATOM    133  CB  LYS A 877      67.387  13.783  26.270  1.00 27.94           C  
ATOM    134  CG  LYS A 877      68.696  14.344  25.742  1.00 28.15           C  
ATOM    135  CD  LYS A 877      69.902  13.831  26.534  1.00 28.63           C  
ATOM    136  CE  LYS A 877      69.954  14.412  27.960  1.00 35.42           C  
ATOM    137  NZ  LYS A 877      70.348  15.866  27.995  1.00 32.06           N  
ATOM    138  N   LEU A 878      65.850  16.363  26.472  1.00 24.65           N  
ATOM    139  CA  LEU A 878      66.011  17.807  26.578  1.00 25.86           C  
ATOM    140  C   LEU A 878      67.490  18.168  26.477  1.00 22.30           C  
ATOM    141  O   LEU A 878      68.325  17.547  27.136  1.00 26.85           O  
ATOM    142  CB  LEU A 878      65.449  18.291  27.910  1.00 22.57           C  
ATOM    143  CG  LEU A 878      63.962  18.055  28.160  1.00 26.49           C  
ATOM    144  CD1 LEU A 878      63.578  18.665  29.496  1.00 25.13           C  
ATOM    145  CD2 LEU A 878      63.149  18.653  27.035  1.00 26.74           C  
ATOM    146  N   VAL A 879      67.812  19.161  25.642  1.00 23.50           N  
ATOM    147  CA  VAL A 879      69.169  19.664  25.487  1.00 22.84           C  
ATOM    148  C   VAL A 879      69.126  21.189  25.501  1.00 22.84           C  
ATOM    149  O   VAL A 879      68.074  21.808  25.367  1.00 22.58           O  
ATOM    150  CB  VAL A 879      69.838  19.170  24.188  1.00 26.03           C  
ATOM    151  CG1 VAL A 879      69.753  17.643  24.086  1.00 28.33           C  
ATOM    152  CG2 VAL A 879      69.194  19.826  22.986  1.00 24.32           C  
ATOM    153  N   ASP A 880      70.298  21.786  25.662  1.00 20.82           N  
ATOM    154  CA  ASP A 880      70.469  23.219  25.456  1.00 20.99           C  
ATOM    155  C   ASP A 880      70.698  23.493  23.971  1.00 25.05           C  
ATOM    156  O   ASP A 880      71.710  23.068  23.408  1.00 25.18           O  
ATOM    157  CB  ASP A 880      71.646  23.714  26.301  1.00 18.25           C  
ATOM    158  CG  ASP A 880      72.023  25.144  26.006  1.00 22.70           C  
ATOM    159  OD1 ASP A 880      71.149  25.903  25.529  1.00 21.17           O  
ATOM    160  OD2 ASP A 880      73.196  25.504  26.275  1.00 21.70           O  
ATOM    161  N   SER A 881      69.773  24.202  23.329  1.00 20.60           N  
ATOM    162  CA  SER A 881      69.930  24.542  21.921  1.00 24.92           C  
ATOM    163  C   SER A 881      70.416  25.972  21.703  1.00 26.61           C  
ATOM    164  O   SER A 881      70.382  26.463  20.570  1.00 27.17           O  
ATOM    165  CB  SER A 881      68.611  24.312  21.176  1.00 31.44           C  
ATOM    166  OG  SER A 881      67.645  25.275  21.568  1.00 33.02           O  
ATOM    167  N   SER A 882      70.883  26.647  22.757  1.00 22.57           N  
ATOM    168  CA  SER A 882      71.317  28.034  22.632  1.00 23.97           C  
ATOM    169  C   SER A 882      72.641  28.184  21.888  1.00 23.73           C  
ATOM    170  O   SER A 882      72.947  29.277  21.411  1.00 24.64           O  
ATOM    171  CB  SER A 882      71.461  28.657  24.015  1.00 22.96           C  
ATOM    172  OG  SER A 882      72.573  28.081  24.684  1.00 21.95           O  
ATOM    173  N   GLY A 883      73.437  27.135  21.799  1.00 27.44           N  
ATOM    174  CA  GLY A 883      74.780  27.228  21.266  1.00 24.84           C  
ATOM    175  C   GLY A 883      75.868  27.123  22.310  1.00 24.48           C  
ATOM    176  O   GLY A 883      77.030  26.899  21.947  1.00 24.75           O  
ATOM    177  N   TYR A 884      75.535  27.260  23.593  1.00 23.16           N  
ATOM    178  CA  TYR A 884      76.522  27.218  24.669  1.00 22.28           C  
ATOM    179  C   TYR A 884      76.717  25.828  25.249  1.00 23.29           C  
ATOM    180  O   TYR A 884      77.617  25.644  26.076  1.00 24.20           O  
ATOM    181  CB  TYR A 884      76.124  28.176  25.794  1.00 23.72           C  
ATOM    182  CG  TYR A 884      76.321  29.628  25.435  1.00 22.43           C  
ATOM    183  CD1 TYR A 884      77.561  30.243  25.605  1.00 24.77           C  
ATOM    184  CD2 TYR A 884      75.280  30.384  24.929  1.00 22.05           C  
ATOM    185  CE1 TYR A 884      77.757  31.573  25.275  1.00 24.55           C  
ATOM    186  CE2 TYR A 884      75.461  31.718  24.592  1.00 23.55           C  
ATOM    187  CZ  TYR A 884      76.702  32.307  24.776  1.00 29.07           C  
ATOM    188  OH  TYR A 884      76.889  33.629  24.452  1.00 29.74           O  
ATOM    189  N   ARG A 885      75.880  24.866  24.855  1.00 22.24           N  
ATOM    190  CA  ARG A 885      76.034  23.459  25.216  1.00 23.13           C  
ATOM    191  C   ARG A 885      76.082  23.238  26.727  1.00 24.44           C  
ATOM    192  O   ARG A 885      76.909  22.481  27.231  1.00 21.32           O  
ATOM    193  CB  ARG A 885      77.275  22.862  24.546  1.00 26.93           C  
ATOM    194  CG  ARG A 885      77.180  22.854  23.038  1.00 26.02           C  
ATOM    195  CD  ARG A 885      78.422  22.244  22.403  1.00 40.09           C  
ATOM    196  NE  ARG A 885      78.477  22.545  20.978  1.00 44.92           N  
ATOM    197  CZ  ARG A 885      79.598  22.772  20.301  1.00 54.91           C  
ATOM    198  NH1 ARG A 885      80.772  22.736  20.924  1.00 50.38           N  
ATOM    199  NH2 ARG A 885      79.541  23.043  19.002  1.00 52.92           N  
ATOM    200  N   SER A 886      75.184  23.883  27.468  1.00 20.45           N  
ATOM    201  CA  SER A 886      75.056  23.541  28.876  1.00 21.34           C  
ATOM    202  C   SER A 886      74.457  22.145  28.983  1.00 22.83           C  
ATOM    203  O   SER A 886      73.559  21.788  28.223  1.00 25.14           O  
ATOM    204  CB  SER A 886      74.183  24.563  29.617  1.00 17.86           C  
ATOM    205  OG  SER A 886      74.841  25.813  29.689  1.00 24.22           O  
ATOM    206  N   ARG A 887      74.978  21.341  29.901  1.00 22.74           N  
ATOM    207  CA  ARG A 887      74.511  19.965  30.031  1.00 23.65           C  
ATOM    208  C   ARG A 887      73.225  19.899  30.848  1.00 22.09           C  
ATOM    209  O   ARG A 887      73.095  20.563  31.880  1.00 23.54           O  
ATOM    210  CB  ARG A 887      75.584  19.098  30.688  1.00 25.45           C  
ATOM    211  CG  ARG A 887      75.206  17.626  30.851  1.00 31.72           C  
ATOM    212  CD  ARG A 887      76.385  16.854  31.460  1.00 37.57           C  
ATOM    213  NE  ARG A 887      76.052  15.481  31.834  1.00 47.29           N  
ATOM    214  CZ  ARG A 887      76.193  14.426  31.034  1.00 57.39           C  
ATOM    215  NH1 ARG A 887      76.651  14.582  29.796  1.00 55.84           N  
ATOM    216  NH2 ARG A 887      75.873  13.211  31.469  1.00 52.84           N  
ATOM    217  N   ILE A 888      72.290  19.058  30.405  1.00 22.67           N  
ATOM    218  CA  ILE A 888      70.988  18.890  31.051  1.00 22.08           C  
ATOM    219  C   ILE A 888      70.902  17.468  31.591  1.00 24.06           C  
ATOM    220  O   ILE A 888      70.845  16.508  30.811  1.00 25.80           O  
ATOM    221  CB  ILE A 888      69.825  19.155  30.087  1.00 22.52           C  
ATOM    222  CG1 ILE A 888      70.034  20.433  29.273  1.00 25.77           C  
ATOM    223  CG2 ILE A 888      68.510  19.183  30.851  1.00 22.73           C  
ATOM    224  CD1 ILE A 888      70.142  21.654  30.077  1.00 28.07           C  
ATOM    225  N   ASN A 889      70.846  17.324  32.913  1.00 22.56           N  
ATOM    226  CA  ASN A 889      70.737  16.020  33.557  1.00 25.76           C  
ATOM    227  C   ASN A 889      69.311  15.829  34.048  1.00 25.00           C  
ATOM    228  O   ASN A 889      68.856  16.565  34.927  1.00 25.63           O  
ATOM    229  CB  ASN A 889      71.714  15.900  34.725  1.00 25.74           C  
ATOM    230  CG  ASN A 889      73.157  15.908  34.271  1.00 32.54           C  
ATOM    231  OD1 ASN A 889      73.481  15.421  33.187  1.00 31.32           O  
ATOM    232  ND2 ASN A 889      74.030  16.466  35.094  1.00 31.05           N  
ATOM    233  N   ILE A 890      68.623  14.838  33.499  1.00 21.06           N  
ATOM    234  CA  ILE A 890      67.208  14.616  33.781  1.00 24.56           C  
ATOM    235  C   ILE A 890      67.068  13.437  34.731  1.00 23.84           C  
ATOM    236  O   ILE A 890      67.506  12.323  34.418  1.00 25.88           O  
ATOM    237  CB  ILE A 890      66.416  14.373  32.491  1.00 25.02           C  
ATOM    238  CG1 ILE A 890      66.466  15.612  31.598  1.00 25.35           C  
ATOM    239  CG2 ILE A 890      64.973  14.052  32.835  1.00 22.17           C  
ATOM    240  CD1 ILE A 890      67.349  15.440  30.396  1.00 31.29           C  
ATOM    241  N   GLY A 891      66.445  13.673  35.887  1.00 25.26           N  
ATOM    242  CA  GLY A 891      66.262  12.618  36.862  1.00 23.02           C  
ATOM    243  C   GLY A 891      65.286  11.550  36.402  1.00 26.79           C  
ATOM    244  O   GLY A 891      64.495  11.736  35.475  1.00 22.80           O  
ATOM    245  N   THR A 892      65.349  10.396  37.080  1.00 30.05           N  
ATOM    246  CA  THR A 892      64.515   9.259  36.708  1.00 28.32           C  
ATOM    247  C   THR A 892      63.055   9.478  37.057  1.00 29.04           C  
ATOM    248  O   THR A 892      62.192   8.801  36.492  1.00 34.01           O  
ATOM    249  CB  THR A 892      65.015   7.978  37.382  1.00 27.73           C  
ATOM    250  OG1 THR A 892      64.977   8.132  38.807  1.00 29.06           O  
ATOM    251  CG2 THR A 892      66.438   7.690  36.958  1.00 29.25           C  
ATOM    252  N   GLY A 893      62.759  10.406  37.963  1.00 25.40           N  
ATOM    253  CA  GLY A 893      61.401  10.689  38.361  1.00 24.51           C  
ATOM    254  C   GLY A 893      60.691  11.761  37.564  1.00 25.00           C  
ATOM    255  O   GLY A 893      59.557  12.101  37.904  1.00 26.04           O  
ATOM    256  N   VAL A 894      61.324  12.312  36.529  1.00 20.56           N  
ATOM    257  CA  VAL A 894      60.669  13.247  35.619  1.00 25.27           C  
ATOM    258  C   VAL A 894      59.745  12.470  34.696  1.00 30.18           C  
ATOM    259  O   VAL A 894      60.095  11.386  34.218  1.00 26.13           O  
ATOM    260  CB  VAL A 894      61.719  14.036  34.816  1.00 27.83           C  
ATOM    261  CG1 VAL A 894      61.061  14.955  33.783  1.00 25.94           C  
ATOM    262  CG2 VAL A 894      62.619  14.822  35.749  1.00 24.29           C  
ATOM    263  N   LYS A 895      58.563  13.018  34.434  1.00 22.48           N  
ATOM    264  CA  LYS A 895      57.626  12.429  33.492  1.00 24.85           C  
ATOM    265  C   LYS A 895      57.398  13.394  32.339  1.00 29.98           C  
ATOM    266  O   LYS A 895      57.512  14.613  32.495  1.00 26.84           O  
ATOM    267  CB  LYS A 895      56.293  12.081  34.174  1.00 26.49           C  
ATOM    268  CG  LYS A 895      56.448  11.034  35.259  1.00 33.52           C  
ATOM    269  CD  LYS A 895      55.125  10.714  35.932  1.00 38.80           C  
ATOM    270  CE  LYS A 895      55.167   9.337  36.568  1.00 50.22           C  
ATOM    271  NZ  LYS A 895      56.496   9.062  37.187  1.00 53.84           N  
ATOM    272  N   PHE A 896      57.091  12.835  31.175  1.00 26.18           N  
ATOM    273  CA  PHE A 896      56.983  13.601  29.946  1.00 27.22           C  
ATOM    274  C   PHE A 896      55.627  13.344  29.315  1.00 27.96           C  
ATOM    275  O   PHE A 896      55.044  12.276  29.489  1.00 26.84           O  
ATOM    276  CB  PHE A 896      58.082  13.230  28.943  1.00 28.89           C  
ATOM    277  CG  PHE A 896      59.470  13.549  29.417  1.00 28.45           C  
ATOM    278  CD1 PHE A 896      60.180  12.643  30.182  1.00 34.63           C  
ATOM    279  CD2 PHE A 896      60.058  14.763  29.105  1.00 31.64           C  
ATOM    280  CE1 PHE A 896      61.466  12.938  30.627  1.00 28.71           C  
ATOM    281  CE2 PHE A 896      61.343  15.059  29.543  1.00 38.48           C  
ATOM    282  CZ  PHE A 896      62.043  14.138  30.307  1.00 32.63           C  
ATOM    283  N   SER A 897      55.134  14.331  28.583  1.00 23.61           N  
ATOM    284  CA  SER A 897      53.976  14.097  27.742  1.00 28.17           C  
ATOM    285  C   SER A 897      54.360  13.235  26.550  1.00 29.50           C  
ATOM    286  O   SER A 897      55.432  13.394  25.959  1.00 24.55           O  
ATOM    287  CB  SER A 897      53.388  15.414  27.251  1.00 26.21           C  
ATOM    288  OG  SER A 897      52.556  15.184  26.129  1.00 27.33           O  
ATOM    289  N   GLU A 898      53.464  12.322  26.187  1.00 33.36           N  
ATOM    290  CA  GLU A 898      53.653  11.553  24.970  1.00 34.33           C  
ATOM    291  C   GLU A 898      53.290  12.356  23.730  1.00 32.64           C  
ATOM    292  O   GLU A 898      53.753  12.025  22.635  1.00 40.22           O  
ATOM    293  CB  GLU A 898      52.830  10.258  25.039  1.00 43.63           C  
ATOM    294  CG  GLU A 898      53.171   9.386  26.259  1.00 53.18           C  
ATOM    295  CD  GLU A 898      52.453   8.035  26.277  1.00 66.17           C  
ATOM    296  OE1 GLU A 898      51.202   8.007  26.272  1.00 67.48           O  
ATOM    297  OE2 GLU A 898      53.146   6.995  26.305  1.00 71.41           O  
ATOM    298  N   ILE A 899      52.508  13.421  23.881  1.00 28.99           N  
ATOM    299  CA  ILE A 899      52.029  14.191  22.737  1.00 31.05           C  
ATOM    300  C   ILE A 899      52.944  15.373  22.441  1.00 33.95           C  
ATOM    301  O   ILE A 899      53.184  15.703  21.277  1.00 31.47           O  
ATOM    302  CB  ILE A 899      50.576  14.650  22.993  1.00 35.04           C  
ATOM    303  CG1 ILE A 899      49.622  13.452  23.019  1.00 37.83           C  
ATOM    304  CG2 ILE A 899      50.130  15.674  21.959  1.00 35.64           C  
ATOM    305  CD1 ILE A 899      49.457  12.818  24.392  1.00 45.25           C  
ATOM    306  N   ASP A 900      53.466  16.018  23.481  1.00 27.97           N  
ATOM    307  CA  ASP A 900      54.350  17.172  23.346  1.00 30.25           C  
ATOM    308  C   ASP A 900      55.570  16.889  24.218  1.00 23.90           C  
ATOM    309  O   ASP A 900      55.507  17.027  25.440  1.00 23.37           O  
ATOM    310  CB  ASP A 900      53.624  18.448  23.770  1.00 30.78           C  
ATOM    311  CG  ASP A 900      54.486  19.687  23.653  1.00 32.06           C  
ATOM    312  OD1 ASP A 900      55.702  19.566  23.377  1.00 28.94           O  
ATOM    313  OD2 ASP A 900      53.931  20.795  23.835  1.00 34.76           O  
ATOM    314  N   LYS A 901      56.677  16.475  23.608  1.00 25.46           N  
ATOM    315  CA  LYS A 901      57.803  16.019  24.412  1.00 23.77           C  
ATOM    316  C   LYS A 901      58.586  17.165  25.056  1.00 24.27           C  
ATOM    317  O   LYS A 901      59.550  16.909  25.785  1.00 24.35           O  
ATOM    318  CB  LYS A 901      58.714  15.124  23.560  1.00 35.69           C  
ATOM    319  CG  LYS A 901      58.026  13.787  23.171  1.00 32.93           C  
ATOM    320  CD  LYS A 901      59.002  12.752  22.634  1.00 41.46           C  
ATOM    321  CE  LYS A 901      58.327  11.386  22.467  1.00 46.06           C  
ATOM    322  NZ  LYS A 901      59.288  10.319  22.049  1.00 51.43           N  
ATOM    323  N   ASN A 902      58.174  18.415  24.852  1.00 25.69           N  
ATOM    324  CA  ASN A 902      58.761  19.501  25.625  1.00 24.11           C  
ATOM    325  C   ASN A 902      58.083  19.691  26.973  1.00 23.87           C  
ATOM    326  O   ASN A 902      58.663  20.325  27.859  1.00 24.84           O  
ATOM    327  CB  ASN A 902      58.716  20.792  24.817  1.00 22.29           C  
ATOM    328  CG  ASN A 902      59.834  20.859  23.804  1.00 25.59           C  
ATOM    329  OD1 ASN A 902      60.980  21.121  24.161  1.00 24.60           O  
ATOM    330  ND2 ASN A 902      59.518  20.608  22.541  1.00 24.82           N  
ATOM    331  N   GLN A 903      56.889  19.137  27.159  1.00 19.82           N  
ATOM    332  CA  GLN A 903      56.191  19.256  28.433  1.00 21.06           C  
ATOM    333  C   GLN A 903      56.743  18.225  29.407  1.00 24.11           C  
ATOM    334  O   GLN A 903      56.675  17.017  29.144  1.00 24.03           O  
ATOM    335  CB  GLN A 903      54.681  19.086  28.237  1.00 19.95           C  
ATOM    336  CG  GLN A 903      54.128  20.045  27.189  1.00 22.97           C  
ATOM    337  CD  GLN A 903      52.604  20.193  27.188  1.00 28.38           C  
ATOM    338  OE1 GLN A 903      52.087  21.133  26.599  1.00 30.58           O  
ATOM    339  NE2 GLN A 903      51.899  19.295  27.852  1.00 22.15           N  
ATOM    340  N   VAL A 904      57.291  18.690  30.530  1.00 19.94           N  
ATOM    341  CA  VAL A 904      57.819  17.799  31.556  1.00 21.08           C  
ATOM    342  C   VAL A 904      57.103  18.058  32.875  1.00 22.78           C  
ATOM    343  O   VAL A 904      56.776  19.203  33.216  1.00 21.07           O  
ATOM    344  CB  VAL A 904      59.351  17.940  31.718  1.00 27.63           C  
ATOM    345  CG1 VAL A 904      60.032  18.015  30.357  1.00 33.03           C  
ATOM    346  CG2 VAL A 904      59.703  19.146  32.517  1.00 27.41           C  
ATOM    347  N   GLN A 905      56.867  16.983  33.620  1.00 19.43           N  
ATOM    348  CA  GLN A 905      56.179  17.036  34.901  1.00 19.99           C  
ATOM    349  C   GLN A 905      57.177  16.774  36.017  1.00 22.60           C  
ATOM    350  O   GLN A 905      57.843  15.731  36.037  1.00 22.51           O  
ATOM    351  CB  GLN A 905      55.033  16.020  34.961  1.00 17.73           C  
ATOM    352  CG  GLN A 905      54.128  16.206  36.178  1.00 15.80           C  
ATOM    353  CD  GLN A 905      53.189  15.027  36.391  1.00 29.61           C  
ATOM    354  OE1 GLN A 905      53.616  13.871  36.374  1.00 31.37           O  
ATOM    355  NE2 GLN A 905      51.904  15.315  36.577  1.00 24.95           N  
ATOM    356  N   LEU A 906      57.275  17.716  36.939  1.00 17.85           N  
ATOM    357  CA  LEU A 906      58.075  17.569  38.143  1.00 21.73           C  
ATOM    358  C   LEU A 906      57.132  17.312  39.310  1.00 23.57           C  
ATOM    359  O   LEU A 906      56.261  18.136  39.602  1.00 19.03           O  
ATOM    360  CB  LEU A 906      58.917  18.826  38.384  1.00 18.54           C  
ATOM    361  CG  LEU A 906      59.839  19.195  37.215  1.00 22.40           C  
ATOM    362  CD1 LEU A 906      60.601  20.493  37.505  1.00 22.31           C  
ATOM    363  CD2 LEU A 906      60.812  18.060  36.918  1.00 23.39           C  
ATOM    364  N   SER A 907      57.294  16.168  39.965  1.00 21.70           N  
ATOM    365  CA  SER A 907      56.446  15.783  41.077  1.00 18.38           C  
ATOM    366  C   SER A 907      57.218  15.985  42.369  1.00 20.82           C  
ATOM    367  O   SER A 907      58.368  16.432  42.370  1.00 23.55           O  
ATOM    368  CB  SER A 907      55.986  14.332  40.915  1.00 25.17           C  
ATOM    369  OG  SER A 907      57.130  13.485  40.844  1.00 32.90           O  
ATOM    370  N   ASN A 908      56.588  15.647  43.488  1.00 24.73           N  
ATOM    371  CA  ASN A 908      57.208  15.883  44.790  1.00 26.33           C  
ATOM    372  C   ASN A 908      57.993  14.650  45.234  1.00 27.97           C  
ATOM    373  O   ASN A 908      57.737  14.055  46.272  1.00 38.56           O  
ATOM    374  CB  ASN A 908      56.156  16.283  45.818  1.00 28.40           C  
ATOM    375  CG  ASN A 908      56.751  17.023  46.985  1.00 29.41           C  
ATOM    376  OD1 ASN A 908      57.967  17.129  47.097  1.00 29.20           O  
ATOM    377  ND2 ASN A 908      55.904  17.531  47.870  1.00 25.74           N  
ATOM    378  N   LEU A 909      58.962  14.282  44.397  1.00 29.87           N  
ATOM    379  CA  LEU A 909      59.853  13.147  44.600  1.00 35.52           C  
ATOM    380  C   LEU A 909      61.291  13.587  44.365  1.00 33.11           C  
ATOM    381  O   LEU A 909      61.562  14.423  43.499  1.00 26.97           O  
ATOM    382  CB  LEU A 909      59.554  11.992  43.637  1.00 32.52           C  
ATOM    383  CG  LEU A 909      58.233  11.231  43.608  1.00 43.15           C  
ATOM    384  CD1 LEU A 909      58.255  10.314  42.395  1.00 35.03           C  
ATOM    385  CD2 LEU A 909      58.017  10.433  44.888  1.00 39.08           C  
ATOM    386  N   GLU A 910      62.218  12.980  45.116  1.00 32.31           N  
ATOM    387  CA  GLU A 910      63.626  13.376  45.041  1.00 32.26           C  
ATOM    388  C   GLU A 910      64.205  13.163  43.650  1.00 27.48           C  
ATOM    389  O   GLU A 910      65.051  13.941  43.195  1.00 29.67           O  
ATOM    390  CB  GLU A 910      64.445  12.596  46.068  1.00 43.55           C  
ATOM    391  CG  GLU A 910      64.288  13.120  47.470  1.00 46.53           C  
ATOM    392  CD  GLU A 910      64.659  14.584  47.559  1.00 54.42           C  
ATOM    393  OE1 GLU A 910      65.770  14.942  47.104  1.00 55.76           O  
ATOM    394  OE2 GLU A 910      63.835  15.378  48.066  1.00 57.43           O  
ATOM    395  N   SER A 911      63.784  12.101  42.972  1.00 24.33           N  
ATOM    396  CA  SER A 911      64.275  11.793  41.639  1.00 26.43           C  
ATOM    397  C   SER A 911      63.614  12.624  40.551  1.00 21.24           C  
ATOM    398  O   SER A 911      64.003  12.512  39.385  1.00 20.82           O  
ATOM    399  CB  SER A 911      64.033  10.319  41.335  1.00 24.89           C  
ATOM    400  OG  SER A 911      62.645  10.067  41.416  1.00 28.04           O  
ATOM    401  N   SER A 912      62.596  13.410  40.890  1.00 24.68           N  
ATOM    402  CA  SER A 912      61.856  14.180  39.895  1.00 21.66           C  
ATOM    403  C   SER A 912      62.492  15.565  39.820  1.00 23.46           C  
ATOM    404  O   SER A 912      62.020  16.537  40.416  1.00 22.20           O  
ATOM    405  CB  SER A 912      60.381  14.260  40.262  1.00 20.86           C  
ATOM    406  OG  SER A 912      59.628  14.708  39.156  1.00 23.91           O  
ATOM    407  N   LYS A 913      63.588  15.645  39.073  1.00 20.58           N  
ATOM    408  CA  LYS A 913      64.372  16.870  39.035  1.00 21.67           C  
ATOM    409  C   LYS A 913      65.115  16.953  37.716  1.00 19.96           C  
ATOM    410  O   LYS A 913      65.398  15.937  37.078  1.00 23.91           O  
ATOM    411  CB  LYS A 913      65.366  16.935  40.198  1.00 22.15           C  
ATOM    412  CG  LYS A 913      66.422  15.837  40.144  1.00 25.04           C  
ATOM    413  CD  LYS A 913      67.320  15.853  41.367  1.00 30.64           C  
ATOM    414  CE  LYS A 913      68.257  14.650  41.357  1.00 35.72           C  
ATOM    415  NZ  LYS A 913      69.203  14.695  42.500  1.00 47.28           N  
ATOM    416  N   ILE A 914      65.417  18.180  37.308  1.00 20.98           N  
ATOM    417  CA  ILE A 914      66.296  18.446  36.176  1.00 18.22           C  
ATOM    418  C   ILE A 914      67.377  19.393  36.667  1.00 21.63           C  
ATOM    419  O   ILE A 914      67.070  20.395  37.327  1.00 19.09           O  
ATOM    420  CB  ILE A 914      65.541  19.056  34.977  1.00 20.51           C  
ATOM    421  CG1 ILE A 914      64.449  18.103  34.484  1.00 19.65           C  
ATOM    422  CG2 ILE A 914      66.503  19.388  33.852  1.00 19.88           C  
ATOM    423  CD1 ILE A 914      63.547  18.710  33.445  1.00 26.26           C  
ATOM    424  N   GLU A 915      68.636  19.067  36.369  1.00 18.21           N  
ATOM    425  CA  GLU A 915      69.773  19.910  36.718  1.00 19.09           C  
ATOM    426  C   GLU A 915      70.472  20.382  35.453  1.00 20.66           C  
ATOM    427  O   GLU A 915      70.794  19.574  34.573  1.00 23.23           O  
ATOM    428  CB  GLU A 915      70.763  19.167  37.621  1.00 25.86           C  
ATOM    429  CG  GLU A 915      71.933  20.040  38.016  1.00 28.22           C  
ATOM    430  CD  GLU A 915      72.760  19.451  39.129  1.00 38.04           C  
ATOM    431  OE1 GLU A 915      72.999  20.165  40.136  1.00 37.72           O  
ATOM    432  OE2 GLU A 915      73.154  18.278  38.996  1.00 36.79           O  
ATOM    433  N   VAL A 916      70.703  21.688  35.353  1.00 21.25           N  
ATOM    434  CA  VAL A 916      71.456  22.270  34.246  1.00 20.05           C  
ATOM    435  C   VAL A 916      72.834  22.648  34.765  1.00 24.00           C  
ATOM    436  O   VAL A 916      72.944  23.342  35.778  1.00 20.29           O  
ATOM    437  CB  VAL A 916      70.742  23.501  33.659  1.00 21.73           C  
ATOM    438  CG1 VAL A 916      71.557  24.109  32.515  1.00 20.84           C  
ATOM    439  CG2 VAL A 916      69.318  23.136  33.212  1.00 20.51           C  
ATOM    440  N   ILE A 917      73.881  22.175  34.094  1.00 23.60           N  
ATOM    441  CA  ILE A 917      75.260  22.556  34.398  1.00 21.56           C  
ATOM    442  C   ILE A 917      75.633  23.648  33.404  1.00 21.23           C  
ATOM    443  O   ILE A 917      75.885  23.373  32.232  1.00 21.10           O  
ATOM    444  CB  ILE A 917      76.218  21.366  34.292  1.00 23.89           C  
ATOM    445  CG1 ILE A 917      75.655  20.154  35.025  1.00 25.83           C  
ATOM    446  CG2 ILE A 917      77.612  21.754  34.815  1.00 27.84           C  
ATOM    447  CD1 ILE A 917      75.574  20.318  36.521  1.00 27.60           C  
ATOM    448  N   LEU A 918      75.670  24.894  33.862  1.00 20.35           N  
ATOM    449  CA  LEU A 918      75.858  26.008  32.945  1.00 19.09           C  
ATOM    450  C   LEU A 918      77.264  26.040  32.358  1.00 21.17           C  
ATOM    451  O   LEU A 918      78.246  25.764  33.044  1.00 22.86           O  
ATOM    452  CB  LEU A 918      75.584  27.322  33.662  1.00 21.83           C  
ATOM    453  CG  LEU A 918      74.119  27.560  34.032  1.00 17.32           C  
ATOM    454  CD1 LEU A 918      74.030  28.867  34.815  1.00 21.05           C  
ATOM    455  CD2 LEU A 918      73.249  27.618  32.777  1.00 21.96           C  
ATOM    456  N   ASN A 919      77.339  26.364  31.070  1.00 21.11           N  
ATOM    457  CA  ASN A 919      78.569  26.860  30.469  1.00 25.29           C  
ATOM    458  C   ASN A 919      79.170  27.930  31.380  1.00 26.06           C  
ATOM    459  O   ASN A 919      78.482  28.866  31.784  1.00 20.41           O  
ATOM    460  CB  ASN A 919      78.238  27.413  29.076  1.00 20.67           C  
ATOM    461  CG  ASN A 919      79.434  28.034  28.366  1.00 22.99           C  
ATOM    462  OD1 ASN A 919      80.079  28.929  28.889  1.00 22.25           O  
ATOM    463  ND2 ASN A 919      79.717  27.562  27.152  1.00 24.60           N  
ATOM    464  N   ASN A 920      80.442  27.758  31.756  1.00 23.00           N  
ATOM    465  CA  ASN A 920      81.021  28.635  32.777  1.00 24.61           C  
ATOM    466  C   ASN A 920      81.043  30.097  32.358  1.00 26.64           C  
ATOM    467  O   ASN A 920      81.075  30.977  33.226  1.00 27.72           O  
ATOM    468  CB  ASN A 920      82.435  28.172  33.132  1.00 28.55           C  
ATOM    469  CG  ASN A 920      82.436  26.821  33.822  1.00 29.92           C  
ATOM    470  OD1 ASN A 920      81.797  26.648  34.850  1.00 37.13           O  
ATOM    471  ND2 ASN A 920      83.121  25.848  33.234  1.00 35.93           N  
ATOM    472  N   GLY A 921      81.011  30.380  31.058  1.00 21.86           N  
ATOM    473  CA  GLY A 921      80.970  31.755  30.596  1.00 25.03           C  
ATOM    474  C   GLY A 921      79.619  32.453  30.713  1.00 26.27           C  
ATOM    475  O   GLY A 921      79.566  33.668  30.497  1.00 25.48           O  
ATOM    476  N   VAL A 922      78.532  31.742  31.025  1.00 23.76           N  
ATOM    477  CA  VAL A 922      77.230  32.397  31.136  1.00 22.33           C  
ATOM    478  C   VAL A 922      76.719  32.452  32.565  1.00 25.51           C  
ATOM    479  O   VAL A 922      75.612  32.962  32.792  1.00 23.91           O  
ATOM    480  CB  VAL A 922      76.179  31.746  30.213  1.00 24.05           C  
ATOM    481  CG1 VAL A 922      76.711  31.645  28.792  1.00 25.13           C  
ATOM    482  CG2 VAL A 922      75.749  30.383  30.747  1.00 20.88           C  
ATOM    483  N   ILE A 923      77.494  31.968  33.538  1.00 19.64           N  
ATOM    484  CA  ILE A 923      77.115  32.100  34.940  1.00 23.24           C  
ATOM    485  C   ILE A 923      76.951  33.576  35.300  1.00 23.28           C  
ATOM    486  O   ILE A 923      77.722  34.432  34.858  1.00 22.96           O  
ATOM    487  CB  ILE A 923      78.167  31.420  35.833  1.00 25.27           C  
ATOM    488  CG1 ILE A 923      78.190  29.907  35.581  1.00 23.57           C  
ATOM    489  CG2 ILE A 923      77.926  31.732  37.302  1.00 22.88           C  
ATOM    490  CD1 ILE A 923      79.296  29.191  36.321  1.00 33.03           C  
ATOM    491  N   TYR A 924      75.933  33.882  36.100  1.00 20.80           N  
ATOM    492  CA  TYR A 924      75.649  35.259  36.484  1.00 20.27           C  
ATOM    493  C   TYR A 924      76.427  35.618  37.746  1.00 19.41           C  
ATOM    494  O   TYR A 924      76.195  35.045  38.811  1.00 18.23           O  
ATOM    495  CB  TYR A 924      74.147  35.472  36.704  1.00 19.89           C  
ATOM    496  CG  TYR A 924      73.779  36.939  36.816  1.00 16.85           C  
ATOM    497  CD1 TYR A 924      73.565  37.701  35.676  1.00 20.49           C  
ATOM    498  CD2 TYR A 924      73.687  37.565  38.053  1.00 16.12           C  
ATOM    499  CE1 TYR A 924      73.250  39.049  35.752  1.00 17.61           C  
ATOM    500  CE2 TYR A 924      73.363  38.934  38.144  1.00 20.15           C  
ATOM    501  CZ  TYR A 924      73.141  39.660  36.984  1.00 17.73           C  
ATOM    502  OH  TYR A 924      72.827  41.004  37.042  1.00 20.28           O  
ATOM    503  N   ASN A 925      77.339  36.580  37.626  1.00 17.09           N  
ATOM    504  CA  ASN A 925      78.037  37.150  38.779  1.00 20.68           C  
ATOM    505  C   ASN A 925      78.228  38.626  38.440  1.00 20.53           C  
ATOM    506  O   ASN A 925      79.188  38.981  37.761  1.00 18.62           O  
ATOM    507  CB  ASN A 925      79.365  36.441  39.045  1.00 20.37           C  
ATOM    508  CG  ASN A 925      80.108  37.002  40.261  1.00 19.36           C  
ATOM    509  OD1 ASN A 925      79.632  37.913  40.935  1.00 20.06           O  
ATOM    510  ND2 ASN A 925      81.274  36.442  40.546  1.00 17.36           N  
ATOM    511  N   SER A 926      77.310  39.477  38.908  1.00 16.53           N  
ATOM    512  CA  SER A 926      77.282  40.835  38.394  1.00 19.47           C  
ATOM    513  C   SER A 926      76.483  41.752  39.312  1.00 18.55           C  
ATOM    514  O   SER A 926      75.563  41.326  40.014  1.00 17.26           O  
ATOM    515  CB  SER A 926      76.668  40.860  36.987  1.00 19.72           C  
ATOM    516  OG  SER A 926      76.660  42.172  36.457  1.00 20.73           O  
ATOM    517  N   MET A 927      76.844  43.022  39.277  1.00 18.00           N  
ATOM    518  CA AMET A 927      76.040  44.056  39.903  0.37 18.19           C  
ATOM    519  CA BMET A 927      76.049  44.062  39.904  0.63 18.09           C  
ATOM    520  C   MET A 927      75.217  44.856  38.903  1.00 16.25           C  
ATOM    521  O   MET A 927      74.175  45.403  39.279  1.00 18.60           O  
ATOM    522  CB AMET A 927      76.941  45.009  40.698  0.37 19.01           C  
ATOM    523  CB BMET A 927      76.970  45.011  40.685  0.63 17.96           C  
ATOM    524  CG AMET A 927      76.239  46.248  41.216  0.37 18.13           C  
ATOM    525  CG BMET A 927      76.256  46.051  41.533  0.63 18.38           C  
ATOM    526  SD AMET A 927      77.344  47.196  42.254  0.37 19.48           S  
ATOM    527  SD BMET A 927      77.349  46.691  42.824  0.63 21.84           S  
ATOM    528  CE AMET A 927      77.446  46.115  43.666  0.37 15.33           C  
ATOM    529  CE BMET A 927      76.386  48.141  43.308  0.63 18.13           C  
ATOM    530  N   TYR A 928      75.632  44.901  37.635  1.00 15.30           N  
ATOM    531  CA  TYR A 928      75.048  45.802  36.654  1.00 19.06           C  
ATOM    532  C   TYR A 928      74.471  45.151  35.404  1.00 22.28           C  
ATOM    533  O   TYR A 928      73.771  45.842  34.662  1.00 20.16           O  
ATOM    534  CB  TYR A 928      76.098  46.825  36.192  1.00 17.96           C  
ATOM    535  CG  TYR A 928      76.714  47.591  37.333  1.00 17.95           C  
ATOM    536  CD1 TYR A 928      75.953  48.465  38.106  1.00 19.57           C  
ATOM    537  CD2 TYR A 928      78.059  47.441  37.636  1.00 21.21           C  
ATOM    538  CE1 TYR A 928      76.528  49.181  39.163  1.00 19.71           C  
ATOM    539  CE2 TYR A 928      78.640  48.144  38.683  1.00 20.99           C  
ATOM    540  CZ  TYR A 928      77.873  49.005  39.444  1.00 19.16           C  
ATOM    541  OH  TYR A 928      78.467  49.696  40.474  1.00 20.31           O  
ATOM    542  N   GLU A 929      74.765  43.879  35.126  1.00 18.42           N  
ATOM    543  CA  GLU A 929      74.288  43.251  33.900  1.00 22.81           C  
ATOM    544  C   GLU A 929      72.803  42.893  33.995  1.00 19.33           C  
ATOM    545  O   GLU A 929      72.366  42.261  34.961  1.00 18.91           O  
ATOM    546  CB  GLU A 929      75.094  41.995  33.609  1.00 20.82           C  
ATOM    547  CG  GLU A 929      76.554  42.255  33.330  1.00 33.42           C  
ATOM    548  CD  GLU A 929      76.843  42.352  31.857  1.00 54.49           C  
ATOM    549  OE1 GLU A 929      76.398  41.441  31.118  1.00 60.09           O  
ATOM    550  OE2 GLU A 929      77.510  43.332  31.444  1.00 57.66           O  
ATOM    551  N   ASN A 930      72.044  43.259  32.970  1.00 17.77           N  
ATOM    552  CA  ASN A 930      70.630  42.912  32.914  1.00 20.44           C  
ATOM    553  C   ASN A 930      70.454  41.469  32.434  1.00 17.02           C  
ATOM    554  O   ASN A 930      71.259  40.951  31.653  1.00 18.00           O  
ATOM    555  CB  ASN A 930      69.885  43.871  31.986  1.00 18.11           C  
ATOM    556  CG  ASN A 930      69.937  45.321  32.461  1.00 20.92           C  
ATOM    557  OD1 ASN A 930      70.202  45.603  33.618  1.00 18.14           O  
ATOM    558  ND2 ASN A 930      69.687  46.239  31.550  1.00 22.67           N  
ATOM    559  N   PHE A 931      69.388  40.814  32.900  1.00 17.00           N  
ATOM    560  CA  PHE A 931      69.116  39.464  32.414  1.00 16.38           C  
ATOM    561  C   PHE A 931      67.626  39.166  32.534  1.00 16.52           C  
ATOM    562  O   PHE A 931      66.911  39.805  33.304  1.00 17.45           O  
ATOM    563  CB  PHE A 931      69.941  38.399  33.151  1.00 14.84           C  
ATOM    564  CG  PHE A 931      69.495  38.118  34.562  1.00 19.93           C  
ATOM    565  CD1 PHE A 931      69.789  38.995  35.590  1.00 21.53           C  
ATOM    566  CD2 PHE A 931      68.841  36.932  34.872  1.00 21.32           C  
ATOM    567  CE1 PHE A 931      69.413  38.706  36.896  1.00 21.05           C  
ATOM    568  CE2 PHE A 931      68.459  36.652  36.163  1.00 20.82           C  
ATOM    569  CZ  PHE A 931      68.747  37.541  37.177  1.00 18.58           C  
ATOM    570  N   SER A 932      67.177  38.187  31.752  1.00 15.16           N  
ATOM    571  CA  SER A 932      65.774  37.793  31.716  1.00 15.04           C  
ATOM    572  C   SER A 932      65.677  36.278  31.685  1.00 16.34           C  
ATOM    573  O   SER A 932      66.628  35.584  31.320  1.00 17.69           O  
ATOM    574  CB  SER A 932      65.045  38.369  30.491  1.00 14.62           C  
ATOM    575  OG  SER A 932      65.237  39.770  30.381  1.00 17.14           O  
ATOM    576  N   THR A 933      64.496  35.773  32.047  1.00 16.43           N  
ATOM    577  CA  THR A 933      64.191  34.356  31.914  1.00 16.55           C  
ATOM    578  C   THR A 933      62.751  34.226  31.439  1.00 16.56           C  
ATOM    579  O   THR A 933      61.924  35.107  31.692  1.00 16.88           O  
ATOM    580  CB  THR A 933      64.378  33.587  33.239  1.00 19.21           C  
ATOM    581  OG1 THR A 933      64.107  32.198  33.017  1.00 21.66           O  
ATOM    582  CG2 THR A 933      63.430  34.090  34.313  1.00 17.61           C  
ATOM    583  N   SER A 934      62.466  33.143  30.725  1.00 19.84           N  
ATOM    584  CA  SER A 934      61.103  32.846  30.310  1.00 16.84           C  
ATOM    585  C   SER A 934      60.878  31.341  30.390  1.00 15.62           C  
ATOM    586  O   SER A 934      61.809  30.547  30.239  1.00 16.86           O  
ATOM    587  CB  SER A 934      60.796  33.360  28.891  1.00 14.74           C  
ATOM    588  OG  SER A 934      61.483  32.630  27.889  1.00 20.60           O  
ATOM    589  N   PHE A 935      59.628  30.967  30.634  1.00 17.90           N  
ATOM    590  CA  PHE A 935      59.220  29.571  30.697  1.00 15.37           C  
ATOM    591  C   PHE A 935      57.702  29.528  30.724  1.00 15.47           C  
ATOM    592  O   PHE A 935      57.042  30.518  31.061  1.00 15.01           O  
ATOM    593  CB  PHE A 935      59.790  28.852  31.925  1.00 15.49           C  
ATOM    594  CG  PHE A 935      59.451  29.515  33.232  1.00 19.82           C  
ATOM    595  CD1 PHE A 935      60.269  30.507  33.761  1.00 18.14           C  
ATOM    596  CD2 PHE A 935      58.326  29.126  33.950  1.00 18.17           C  
ATOM    597  CE1 PHE A 935      59.962  31.117  34.981  1.00 17.05           C  
ATOM    598  CE2 PHE A 935      58.005  29.723  35.147  1.00 16.18           C  
ATOM    599  CZ  PHE A 935      58.833  30.722  35.676  1.00 19.99           C  
ATOM    600  N   TRP A 936      57.163  28.356  30.396  1.00 17.56           N  
ATOM    601  CA  TRP A 936      55.739  28.083  30.519  1.00 17.94           C  
ATOM    602  C   TRP A 936      55.525  27.153  31.702  1.00 13.85           C  
ATOM    603  O   TRP A 936      56.349  26.266  31.958  1.00 19.74           O  
ATOM    604  CB  TRP A 936      55.177  27.436  29.249  1.00 16.39           C  
ATOM    605  CG  TRP A 936      55.286  28.258  27.997  1.00 17.78           C  
ATOM    606  CD1 TRP A 936      56.436  28.603  27.328  1.00 18.91           C  
ATOM    607  CD2 TRP A 936      54.200  28.807  27.236  1.00 18.55           C  
ATOM    608  NE1 TRP A 936      56.123  29.335  26.201  1.00 18.81           N  
ATOM    609  CE2 TRP A 936      54.760  29.484  26.133  1.00 18.93           C  
ATOM    610  CE3 TRP A 936      52.803  28.794  27.385  1.00 21.44           C  
ATOM    611  CZ2 TRP A 936      53.976  30.129  25.178  1.00 20.62           C  
ATOM    612  CZ3 TRP A 936      52.025  29.442  26.438  1.00 24.22           C  
ATOM    613  CH2 TRP A 936      52.614  30.101  25.347  1.00 22.32           C  
ATOM    614  N   ILE A 937      54.429  27.349  32.427  1.00 13.27           N  
ATOM    615  CA  ILE A 937      54.162  26.528  33.603  1.00 15.78           C  
ATOM    616  C   ILE A 937      52.667  26.288  33.726  1.00 14.36           C  
ATOM    617  O   ILE A 937      51.851  27.116  33.303  1.00 17.63           O  
ATOM    618  CB  ILE A 937      54.748  27.177  34.889  1.00 16.41           C  
ATOM    619  CG1 ILE A 937      54.701  26.207  36.079  1.00 14.93           C  
ATOM    620  CG2 ILE A 937      54.019  28.453  35.214  1.00 18.04           C  
ATOM    621  CD1 ILE A 937      55.448  26.714  37.303  1.00 16.58           C  
ATOM    622  N   ARG A 938      52.311  25.128  34.284  1.00 16.24           N  
ATOM    623  CA  ARG A 938      50.920  24.764  34.551  1.00 17.43           C  
ATOM    624  C   ARG A 938      50.848  24.197  35.963  1.00 16.21           C  
ATOM    625  O   ARG A 938      51.523  23.207  36.277  1.00 18.57           O  
ATOM    626  CB  ARG A 938      50.380  23.761  33.515  1.00 16.11           C  
ATOM    627  CG  ARG A 938      48.819  23.652  33.527  1.00 16.75           C  
ATOM    628  CD  ARG A 938      48.259  23.089  32.221  1.00 16.70           C  
ATOM    629  NE  ARG A 938      48.452  21.635  32.099  1.00 17.72           N  
ATOM    630  CZ  ARG A 938      47.610  20.722  32.576  1.00 19.49           C  
ATOM    631  NH1 ARG A 938      46.512  21.102  33.227  1.00 16.70           N  
ATOM    632  NH2 ARG A 938      47.861  19.420  32.410  1.00 17.43           N  
ATOM    633  N   ILE A 939      50.064  24.841  36.815  1.00 13.92           N  
ATOM    634  CA  ILE A 939      50.049  24.594  38.251  1.00 15.43           C  
ATOM    635  C   ILE A 939      48.670  24.066  38.635  1.00 15.08           C  
ATOM    636  O   ILE A 939      47.663  24.763  38.427  1.00 15.68           O  
ATOM    637  CB  ILE A 939      50.371  25.876  39.039  1.00 18.42           C  
ATOM    638  CG1 ILE A 939      51.748  26.420  38.652  1.00 17.13           C  
ATOM    639  CG2 ILE A 939      50.286  25.628  40.542  1.00 17.11           C  
ATOM    640  CD1 ILE A 939      52.012  27.814  39.231  1.00 19.83           C  
ATOM    641  N   PRO A 940      48.564  22.860  39.207  1.00 15.06           N  
ATOM    642  CA  PRO A 940      47.242  22.339  39.583  1.00 17.62           C  
ATOM    643  C   PRO A 940      46.542  23.234  40.598  1.00 18.38           C  
ATOM    644  O   PRO A 940      47.178  23.942  41.380  1.00 19.28           O  
ATOM    645  CB  PRO A 940      47.552  20.960  40.187  1.00 15.58           C  
ATOM    646  CG  PRO A 940      48.908  20.596  39.695  1.00 20.67           C  
ATOM    647  CD  PRO A 940      49.647  21.901  39.499  1.00 17.08           C  
ATOM    648  N   LYS A 941      45.211  23.199  40.572  1.00 15.82           N  
ATOM    649  CA  LYS A 941      44.422  23.878  41.591  1.00 17.08           C  
ATOM    650  C   LYS A 941      44.846  23.411  42.983  1.00 17.17           C  
ATOM    651  O   LYS A 941      45.203  22.246  43.180  1.00 16.10           O  
ATOM    652  CB  LYS A 941      42.929  23.601  41.368  1.00 14.61           C  
ATOM    653  CG  LYS A 941      41.988  24.222  42.399  1.00 19.26           C  
ATOM    654  CD  LYS A 941      40.527  24.090  41.924  1.00 20.76           C  
ATOM    655  CE  LYS A 941      39.544  24.287  43.052  1.00 18.89           C  
ATOM    656  NZ  LYS A 941      38.119  24.169  42.569  1.00 21.44           N  
ATOM    657  N   TYR A 942      44.855  24.340  43.941  1.00 16.54           N  
ATOM    658  CA  TYR A 942      45.184  24.015  45.325  1.00 18.62           C  
ATOM    659  C   TYR A 942      43.905  23.668  46.078  1.00 17.00           C  
ATOM    660  O   TYR A 942      42.943  24.445  46.074  1.00 15.00           O  
ATOM    661  CB  TYR A 942      45.892  25.175  46.033  1.00 15.06           C  
ATOM    662  CG  TYR A 942      47.320  25.444  45.578  1.00 18.26           C  
ATOM    663  CD1 TYR A 942      48.394  24.746  46.128  1.00 16.79           C  
ATOM    664  CD2 TYR A 942      47.598  26.417  44.627  1.00 16.64           C  
ATOM    665  CE1 TYR A 942      49.714  25.008  45.732  1.00 19.40           C  
ATOM    666  CE2 TYR A 942      48.930  26.678  44.218  1.00 16.45           C  
ATOM    667  CZ  TYR A 942      49.973  25.972  44.780  1.00 17.15           C  
ATOM    668  OH  TYR A 942      51.281  26.221  44.384  1.00 16.95           O  
ATOM    669  N   PHE A 943      43.899  22.497  46.722  1.00 17.93           N  
ATOM    670  CA  PHE A 943      42.780  22.074  47.552  1.00 19.59           C  
ATOM    671  C   PHE A 943      43.089  22.138  49.038  1.00 20.32           C  
ATOM    672  O   PHE A 943      42.193  21.911  49.858  1.00 19.40           O  
ATOM    673  CB  PHE A 943      42.353  20.649  47.165  1.00 18.42           C  
ATOM    674  CG  PHE A 943      41.497  20.598  45.918  1.00 19.33           C  
ATOM    675  CD1 PHE A 943      42.074  20.617  44.663  1.00 23.32           C  
ATOM    676  CD2 PHE A 943      40.121  20.548  46.010  1.00 19.86           C  
ATOM    677  CE1 PHE A 943      41.296  20.589  43.514  1.00 18.21           C  
ATOM    678  CE2 PHE A 943      39.336  20.517  44.859  1.00 23.00           C  
ATOM    679  CZ  PHE A 943      39.935  20.537  43.611  1.00 18.69           C  
ATOM    680  N   ARG A 944      44.326  22.432  49.403  1.00 18.44           N  
ATOM    681  CA  ARG A 944      44.709  22.568  50.795  1.00 23.30           C  
ATOM    682  C   ARG A 944      45.618  23.775  50.934  1.00 33.88           C  
ATOM    683  O   ARG A 944      46.445  24.050  50.054  1.00 34.67           O  
ATOM    684  CB  ARG A 944      45.463  21.341  51.317  1.00 25.21           C  
ATOM    685  CG  ARG A 944      44.753  20.034  51.201  1.00 30.03           C  
ATOM    686  CD  ARG A 944      45.731  18.878  51.455  1.00 29.84           C  
ATOM    687  NE  ARG A 944      46.224  18.313  50.206  1.00 38.74           N  
ATOM    688  CZ  ARG A 944      46.851  17.143  50.103  1.00 49.18           C  
ATOM    689  NH1 ARG A 944      47.247  16.715  48.908  1.00 48.31           N  
ATOM    690  NH2 ARG A 944      47.073  16.398  51.186  1.00 49.31           N  
ATOM    691  N   ASN A 945      45.488  24.468  52.066  1.00 27.87           N  
ATOM    692  CA  ASN A 945      46.405  25.556  52.359  1.00 36.86           C  
ATOM    693  C   ASN A 945      47.834  25.053  52.369  1.00 36.09           C  
ATOM    694  O   ASN A 945      48.143  23.979  52.889  1.00 39.70           O  
ATOM    695  CB  ASN A 945      46.072  26.223  53.683  1.00 41.99           C  
ATOM    696  CG  ASN A 945      45.219  27.451  53.494  1.00 44.78           C  
ATOM    697  OD1 ASN A 945      44.052  27.469  53.876  1.00 46.02           O  
ATOM    698  ND2 ASN A 945      45.791  28.484  52.877  1.00 43.02           N  
ATOM    699  N   ILE A 946      48.682  25.810  51.711  1.00 37.79           N  
ATOM    700  CA  ILE A 946      50.092  25.519  51.619  1.00 40.14           C  
ATOM    701  C   ILE A 946      50.713  26.328  52.754  1.00 49.83           C  
ATOM    702  O   ILE A 946      51.126  25.742  53.764  1.00 54.34           O  
ATOM    703  CB  ILE A 946      50.585  25.839  50.187  1.00 38.30           C  
ATOM    704  CG1 ILE A 946      50.102  24.733  49.226  1.00 37.96           C  
ATOM    705  CG2 ILE A 946      52.052  25.968  50.058  1.00 31.76           C  
ATOM    706  CD1 ILE A 946      50.996  23.485  49.146  1.00 31.37           C  
ATOM    707  N   ASN A 947      50.625  27.666  52.674  1.00 44.08           N  
ATOM    708  CA  ASN A 947      51.328  28.576  53.576  1.00 46.52           C  
ATOM    709  C   ASN A 947      52.633  27.907  53.970  1.00 48.15           C  
ATOM    710  O   ASN A 947      52.834  27.479  55.109  1.00 50.40           O  
ATOM    711  CB  ASN A 947      50.469  28.945  54.789  1.00 47.49           C  
ATOM    712  CG  ASN A 947      49.590  30.157  54.527  1.00 46.17           C  
ATOM    713  OD1 ASN A 947      50.075  31.285  54.464  1.00 50.46           O  
ATOM    714  ND2 ASN A 947      48.296  29.927  54.360  1.00 49.99           N  
ATOM    715  N   ASN A 948      53.514  27.826  52.987  1.00 46.93           N  
ATOM    716  CA  ASN A 948      54.552  26.818  52.828  1.00 44.61           C  
ATOM    717  C   ASN A 948      55.170  27.134  51.483  1.00 30.84           C  
ATOM    718  O   ASN A 948      54.915  26.438  50.503  1.00 40.30           O  
ATOM    719  CB  ASN A 948      53.964  25.405  52.854  1.00 48.77           C  
ATOM    720  CG  ASN A 948      54.938  24.326  52.348  1.00 43.27           C  
ATOM    721  OD1 ASN A 948      54.519  23.358  51.689  1.00 46.61           O  
ATOM    722  ND2 ASN A 948      56.225  24.471  52.693  1.00 48.90           N  
ATOM    723  N   GLU A 949      55.871  28.252  51.393  1.00 32.47           N  
ATOM    724  CA  GLU A 949      56.489  28.603  50.130  1.00 25.19           C  
ATOM    725  C   GLU A 949      57.521  27.544  49.775  1.00 21.99           C  
ATOM    726  O   GLU A 949      58.337  27.171  50.615  1.00 24.36           O  
ATOM    727  CB  GLU A 949      57.127  29.979  50.231  1.00 24.08           C  
ATOM    728  CG  GLU A 949      57.845  30.369  48.980  1.00 23.39           C  
ATOM    729  CD  GLU A 949      58.446  31.759  49.045  1.00 35.10           C  
ATOM    730  OE1 GLU A 949      58.001  32.572  49.886  1.00 35.61           O  
ATOM    731  OE2 GLU A 949      59.359  32.038  48.236  1.00 29.69           O  
ATOM    732  N   TYR A 950      57.464  27.032  48.542  1.00 19.73           N  
ATOM    733  CA  TYR A 950      58.391  25.999  48.096  1.00 21.99           C  
ATOM    734  C   TYR A 950      59.074  26.390  46.789  1.00 21.72           C  
ATOM    735  O   TYR A 950      58.435  26.920  45.880  1.00 18.77           O  
ATOM    736  CB  TYR A 950      57.664  24.634  47.952  1.00 18.44           C  
ATOM    737  CG  TYR A 950      56.468  24.571  46.992  1.00 18.84           C  
ATOM    738  CD1 TYR A 950      55.212  25.034  47.370  1.00 20.20           C  
ATOM    739  CD2 TYR A 950      56.592  23.992  45.733  1.00 18.64           C  
ATOM    740  CE1 TYR A 950      54.124  24.958  46.507  1.00 17.50           C  
ATOM    741  CE2 TYR A 950      55.517  23.907  44.870  1.00 17.79           C  
ATOM    742  CZ  TYR A 950      54.278  24.390  45.271  1.00 17.79           C  
ATOM    743  OH  TYR A 950      53.199  24.319  44.428  1.00 20.66           O  
ATOM    744  N   LYS A 951      60.384  26.133  46.702  1.00 16.57           N  
ATOM    745  CA  LYS A 951      61.148  26.425  45.494  1.00 15.01           C  
ATOM    746  C   LYS A 951      60.750  25.506  44.344  1.00 17.13           C  
ATOM    747  O   LYS A 951      60.391  24.344  44.553  1.00 21.10           O  
ATOM    748  CB  LYS A 951      62.649  26.257  45.777  1.00 19.23           C  
ATOM    749  CG  LYS A 951      63.113  27.063  46.992  1.00 32.49           C  
ATOM    750  CD  LYS A 951      64.559  26.730  47.389  1.00 39.95           C  
ATOM    751  CE  LYS A 951      64.890  27.239  48.802  1.00 46.41           C  
ATOM    752  NZ  LYS A 951      64.596  28.695  49.005  1.00 49.07           N  
ATOM    753  N   ILE A 952      60.852  26.011  43.109  1.00 15.31           N  
ATOM    754  CA  ILE A 952      60.722  25.115  41.961  1.00 17.12           C  
ATOM    755  C   ILE A 952      61.888  25.237  40.984  1.00 17.47           C  
ATOM    756  O   ILE A 952      62.222  24.271  40.295  1.00 17.51           O  
ATOM    757  CB  ILE A 952      59.379  25.293  41.226  1.00 18.96           C  
ATOM    758  CG1 ILE A 952      59.118  26.751  40.840  1.00 19.05           C  
ATOM    759  CG2 ILE A 952      58.231  24.693  42.075  1.00 17.68           C  
ATOM    760  CD1 ILE A 952      58.015  26.882  39.747  1.00 16.07           C  
ATOM    761  N   ILE A 953      62.525  26.405  40.908  1.00 17.51           N  
ATOM    762  CA  ILE A 953      63.678  26.593  40.032  1.00 17.17           C  
ATOM    763  C   ILE A 953      64.704  27.419  40.791  1.00 20.84           C  
ATOM    764  O   ILE A 953      64.428  28.572  41.141  1.00 19.31           O  
ATOM    765  CB  ILE A 953      63.316  27.302  38.711  1.00 18.77           C  
ATOM    766  CG1 ILE A 953      62.104  26.658  38.036  1.00 17.89           C  
ATOM    767  CG2 ILE A 953      64.510  27.313  37.755  1.00 17.34           C  
ATOM    768  CD1 ILE A 953      61.696  27.391  36.775  1.00 20.80           C  
ATOM    769  N   SER A 954      65.896  26.855  41.017  1.00 17.12           N  
ATOM    770  CA  SER A 954      66.863  27.468  41.924  1.00 19.20           C  
ATOM    771  C   SER A 954      68.233  27.614  41.271  1.00 17.67           C  
ATOM    772  O   SER A 954      68.751  26.662  40.681  1.00 18.42           O  
ATOM    773  CB  SER A 954      66.995  26.651  43.213  1.00 21.61           C  
ATOM    774  OG  SER A 954      67.846  27.323  44.123  1.00 23.66           O  
ATOM    775  N   CYS A 955      68.823  28.819  41.393  1.00 18.01           N  
ATOM    776  CA  CYS A 955      70.181  29.110  40.935  1.00 17.56           C  
ATOM    777  C   CYS A 955      70.847  29.957  42.021  1.00 18.68           C  
ATOM    778  O   CYS A 955      71.092  31.153  41.873  1.00 16.18           O  
ATOM    779  CB  CYS A 955      70.184  29.808  39.578  1.00 17.74           C  
ATOM    780  SG  CYS A 955      71.824  29.929  38.830  1.00 20.22           S  
ATOM    781  N   MET A 956      71.111  29.320  43.158  1.00 21.22           N  
ATOM    782  CA  MET A 956      71.595  29.979  44.359  1.00 21.54           C  
ATOM    783  C   MET A 956      72.870  29.293  44.821  1.00 25.33           C  
ATOM    784  O   MET A 956      72.983  28.067  44.750  1.00 22.28           O  
ATOM    785  CB  MET A 956      70.576  29.925  45.503  1.00 24.60           C  
ATOM    786  CG  MET A 956      69.280  30.647  45.248  1.00 22.92           C  
ATOM    787  SD  MET A 956      69.501  32.426  45.420  1.00 26.23           S  
ATOM    788  CE  MET A 956      69.887  32.642  47.150  1.00 20.81           C  
ATOM    789  N   GLN A 957      73.813  30.087  45.312  1.00 23.13           N  
ATOM    790  CA  GLN A 957      74.995  29.555  45.972  1.00 25.96           C  
ATOM    791  C   GLN A 957      75.393  30.548  47.057  1.00 25.30           C  
ATOM    792  O   GLN A 957      75.330  31.762  46.841  1.00 23.26           O  
ATOM    793  CB  GLN A 957      76.135  29.303  44.970  1.00 26.78           C  
ATOM    794  CG  GLN A 957      76.703  30.546  44.277  1.00 26.77           C  
ATOM    795  CD  GLN A 957      77.753  31.256  45.128  1.00 33.43           C  
ATOM    796  OE1 GLN A 957      78.552  30.604  45.788  1.00 29.42           O  
ATOM    797  NE2 GLN A 957      77.719  32.596  45.151  1.00 27.58           N  
ATOM    798  N   ASN A 958      75.741  30.032  48.237  1.00 26.74           N  
ATOM    799  CA  ASN A 958      76.155  30.874  49.370  1.00 26.90           C  
ATOM    800  C   ASN A 958      75.182  32.031  49.603  1.00 26.54           C  
ATOM    801  O   ASN A 958      75.589  33.171  49.855  1.00 27.21           O  
ATOM    802  CB  ASN A 958      77.579  31.400  49.179  1.00 32.65           C  
ATOM    803  CG  ASN A 958      78.636  30.321  49.373  1.00 42.79           C  
ATOM    804  OD1 ASN A 958      78.464  29.393  50.170  1.00 48.35           O  
ATOM    805  ND2 ASN A 958      79.743  30.443  48.642  1.00 44.92           N  
ATOM    806  N   ASN A 959      73.881  31.734  49.482  1.00 20.11           N  
ATOM    807  CA  ASN A 959      72.797  32.684  49.743  1.00 22.98           C  
ATOM    808  C   ASN A 959      72.825  33.876  48.785  1.00 22.62           C  
ATOM    809  O   ASN A 959      72.493  35.002  49.166  1.00 22.90           O  
ATOM    810  CB  ASN A 959      72.818  33.159  51.199  1.00 28.58           C  
ATOM    811  CG  ASN A 959      72.564  32.022  52.181  1.00 33.30           C  
ATOM    812  OD1 ASN A 959      71.542  31.343  52.115  1.00 36.00           O  
ATOM    813  ND2 ASN A 959      73.504  31.798  53.076  1.00 31.75           N  
ATOM    814  N   SER A 960      73.212  33.643  47.536  1.00 20.17           N  
ATOM    815  CA  SER A 960      73.106  34.665  46.504  1.00 20.07           C  
ATOM    816  C   SER A 960      72.672  34.018  45.196  1.00 18.84           C  
ATOM    817  O   SER A 960      73.007  32.866  44.912  1.00 18.71           O  
ATOM    818  CB  SER A 960      74.428  35.429  46.299  1.00 19.70           C  
ATOM    819  OG  SER A 960      74.243  36.523  45.400  1.00 18.64           O  
ATOM    820  N   GLY A 961      71.914  34.767  44.403  1.00 16.68           N  
ATOM    821  CA  GLY A 961      71.484  34.255  43.121  1.00 17.63           C  
ATOM    822  C   GLY A 961      70.023  34.561  42.857  1.00 19.16           C  
ATOM    823  O   GLY A 961      69.504  35.589  43.305  1.00 17.36           O  
ATOM    824  N   TRP A 962      69.350  33.694  42.116  1.00 15.92           N  
ATOM    825  CA  TRP A 962      67.947  33.925  41.799  1.00 15.93           C  
ATOM    826  C   TRP A 962      67.190  32.626  42.009  1.00 16.56           C  
ATOM    827  O   TRP A 962      67.776  31.548  41.966  1.00 16.98           O  
ATOM    828  CB  TRP A 962      67.753  34.444  40.366  1.00 13.53           C  
ATOM    829  CG  TRP A 962      68.322  33.582  39.226  1.00 17.08           C  
ATOM    830  CD1 TRP A 962      69.504  33.766  38.571  1.00 18.69           C  
ATOM    831  CD2 TRP A 962      67.699  32.441  38.605  1.00 16.73           C  
ATOM    832  NE1 TRP A 962      69.665  32.812  37.593  1.00 18.49           N  
ATOM    833  CE2 TRP A 962      68.576  31.981  37.598  1.00 20.71           C  
ATOM    834  CE3 TRP A 962      66.501  31.753  38.821  1.00 15.69           C  
ATOM    835  CZ2 TRP A 962      68.284  30.864  36.794  1.00 20.85           C  
ATOM    836  CZ3 TRP A 962      66.220  30.629  38.029  1.00 20.19           C  
ATOM    837  CH2 TRP A 962      67.104  30.208  37.027  1.00 16.68           C  
ATOM    838  N   GLU A 963      65.872  32.737  42.202  1.00 16.26           N  
ATOM    839  CA  GLU A 963      65.060  31.574  42.546  1.00 17.87           C  
ATOM    840  C   GLU A 963      63.608  31.835  42.164  1.00 17.24           C  
ATOM    841  O   GLU A 963      63.112  32.949  42.352  1.00 18.87           O  
ATOM    842  CB  GLU A 963      65.157  31.304  44.052  1.00 18.18           C  
ATOM    843  CG  GLU A 963      64.782  29.939  44.526  1.00 25.88           C  
ATOM    844  CD  GLU A 963      65.487  29.617  45.844  1.00 30.92           C  
ATOM    845  OE1 GLU A 963      65.112  30.197  46.887  1.00 34.12           O  
ATOM    846  OE2 GLU A 963      66.454  28.826  45.820  1.00 32.61           O  
ATOM    847  N   VAL A 964      62.932  30.812  41.644  1.00 16.87           N  
ATOM    848  CA  VAL A 964      61.481  30.837  41.443  1.00 16.58           C  
ATOM    849  C   VAL A 964      60.848  29.918  42.479  1.00 15.27           C  
ATOM    850  O   VAL A 964      61.246  28.753  42.602  1.00 17.84           O  
ATOM    851  CB  VAL A 964      61.085  30.383  40.027  1.00 13.96           C  
ATOM    852  CG1 VAL A 964      59.556  30.407  39.864  1.00 12.37           C  
ATOM    853  CG2 VAL A 964      61.766  31.232  38.947  1.00 14.95           C  
ATOM    854  N   SER A 965      59.861  30.425  43.209  1.00 16.92           N  
ATOM    855  CA  SER A 965      59.153  29.615  44.186  1.00 15.28           C  
ATOM    856  C   SER A 965      57.643  29.779  43.992  1.00 16.91           C  
ATOM    857  O   SER A 965      57.180  30.680  43.293  1.00 15.22           O  
ATOM    858  CB  SER A 965      59.561  29.996  45.611  1.00 17.82           C  
ATOM    859  OG  SER A 965      59.334  31.369  45.823  1.00 22.74           O  
ATOM    860  N   LEU A 966      56.877  28.878  44.605  1.00 17.10           N  
ATOM    861  CA  LEU A 966      55.421  28.909  44.551  1.00 17.82           C  
ATOM    862  C   LEU A 966      54.868  28.946  45.967  1.00 15.08           C  
ATOM    863  O   LEU A 966      55.499  28.473  46.914  1.00 18.20           O  
ATOM    864  CB  LEU A 966      54.853  27.682  43.817  1.00 16.75           C  
ATOM    865  CG  LEU A 966      55.321  27.365  42.389  1.00 16.94           C  
ATOM    866  CD1 LEU A 966      54.537  26.158  41.824  1.00 15.21           C  
ATOM    867  CD2 LEU A 966      55.189  28.575  41.470  1.00 16.95           C  
ATOM    868  N   ASN A 967      53.656  29.466  46.109  1.00 15.89           N  
ATOM    869  CA  ASN A 967      52.975  29.418  47.396  1.00 17.26           C  
ATOM    870  C   ASN A 967      51.481  29.491  47.124  1.00 20.75           C  
ATOM    871  O   ASN A 967      51.049  29.818  46.017  1.00 17.79           O  
ATOM    872  CB  ASN A 967      53.437  30.551  48.323  1.00 19.10           C  
ATOM    873  CG  ASN A 967      53.062  30.329  49.794  1.00 22.79           C  
ATOM    874  OD1 ASN A 967      52.578  29.266  50.192  1.00 20.76           O  
ATOM    875  ND2 ASN A 967      53.299  31.350  50.606  1.00 23.73           N  
ATOM    876  N   PHE A 968      50.701  29.153  48.145  1.00 16.33           N  
ATOM    877  CA  PHE A 968      49.252  29.297  48.106  1.00 17.75           C  
ATOM    878  C   PHE A 968      48.816  29.820  49.462  1.00 18.75           C  
ATOM    879  O   PHE A 968      49.049  29.162  50.477  1.00 20.11           O  
ATOM    880  CB  PHE A 968      48.558  27.970  47.783  1.00 16.66           C  
ATOM    881  CG  PHE A 968      47.060  28.051  47.842  1.00 18.33           C  
ATOM    882  CD1 PHE A 968      46.364  28.804  46.911  1.00 15.10           C  
ATOM    883  CD2 PHE A 968      46.351  27.385  48.838  1.00 20.42           C  
ATOM    884  CE1 PHE A 968      44.964  28.881  46.960  1.00 18.23           C  
ATOM    885  CE2 PHE A 968      44.968  27.459  48.893  1.00 20.73           C  
ATOM    886  CZ  PHE A 968      44.277  28.216  47.953  1.00 17.46           C  
ATOM    887  N   SER A 969      48.243  31.024  49.490  1.00 18.99           N  
ATOM    888  CA  SER A 969      47.862  31.659  50.742  1.00 22.82           C  
ATOM    889  C   SER A 969      46.673  32.565  50.479  1.00 21.89           C  
ATOM    890  O   SER A 969      46.641  33.263  49.465  1.00 20.79           O  
ATOM    891  CB  SER A 969      49.007  32.500  51.334  1.00 26.25           C  
ATOM    892  OG  SER A 969      50.241  31.842  51.170  1.00 39.94           O  
ATOM    893  N   ASN A 970      45.706  32.553  51.392  1.00 26.21           N  
ATOM    894  CA  ASN A 970      44.583  33.492  51.336  1.00 27.80           C  
ATOM    895  C   ASN A 970      43.846  33.393  49.999  1.00 23.59           C  
ATOM    896  O   ASN A 970      43.463  34.404  49.405  1.00 20.81           O  
ATOM    897  CB  ASN A 970      45.072  34.920  51.596  1.00 26.83           C  
ATOM    898  CG  ASN A 970      43.936  35.901  51.881  1.00 33.49           C  
ATOM    899  OD1 ASN A 970      42.918  35.543  52.470  1.00 37.74           O  
ATOM    900  ND2 ASN A 970      44.128  37.155  51.478  1.00 37.32           N  
ATOM    901  N   MET A 971      43.672  32.161  49.518  1.00 22.14           N  
ATOM    902  CA  MET A 971      43.008  31.794  48.265  1.00 21.62           C  
ATOM    903  C   MET A 971      43.777  32.198  47.008  1.00 20.31           C  
ATOM    904  O   MET A 971      43.245  32.050  45.900  1.00 20.77           O  
ATOM    905  CB  MET A 971      41.581  32.356  48.186  1.00 22.48           C  
ATOM    906  CG  MET A 971      40.658  31.803  49.267  1.00 26.37           C  
ATOM    907  SD  MET A 971      38.938  32.320  49.070  1.00 28.70           S  
ATOM    908  CE  MET A 971      38.380  31.181  47.832  1.00 21.52           C  
ATOM    909  N   ASN A 972      45.023  32.658  47.131  1.00 17.11           N  
ATOM    910  CA  ASN A 972      45.816  33.101  45.991  1.00 16.68           C  
ATOM    911  C   ASN A 972      46.931  32.102  45.719  1.00 15.03           C  
ATOM    912  O   ASN A 972      47.727  31.807  46.608  1.00 17.09           O  
ATOM    913  CB  ASN A 972      46.445  34.476  46.242  1.00 20.52           C  
ATOM    914  CG  ASN A 972      45.421  35.576  46.386  1.00 25.09           C  
ATOM    915  OD1 ASN A 972      44.545  35.726  45.547  1.00 22.35           O  
ATOM    916  ND2 ASN A 972      45.536  36.363  47.458  1.00 26.99           N  
ATOM    917  N   SER A 973      46.989  31.607  44.490  1.00 14.86           N  
ATOM    918  CA  SER A 973      48.174  30.937  43.983  1.00 16.71           C  
ATOM    919  C   SER A 973      49.212  31.980  43.594  1.00 17.95           C  
ATOM    920  O   SER A 973      48.877  32.982  42.963  1.00 16.12           O  
ATOM    921  CB  SER A 973      47.808  30.084  42.771  1.00 18.33           C  
ATOM    922  OG  SER A 973      48.957  29.508  42.173  1.00 19.27           O  
ATOM    923  N   LYS A 974      50.476  31.739  43.959  1.00 18.19           N  
ATOM    924  CA  LYS A 974      51.541  32.719  43.768  1.00 19.18           C  
ATOM    925  C   LYS A 974      52.725  32.097  43.047  1.00 18.65           C  
ATOM    926  O   LYS A 974      53.091  30.953  43.320  1.00 18.12           O  
ATOM    927  CB  LYS A 974      52.037  33.288  45.104  1.00 18.29           C  
ATOM    928  CG  LYS A 974      50.921  33.825  45.981  1.00 18.62           C  
ATOM    929  CD  LYS A 974      51.444  34.546  47.199  1.00 24.40           C  
ATOM    930  CE  LYS A 974      50.270  35.059  48.021  1.00 35.95           C  
ATOM    931  NZ  LYS A 974      50.681  36.075  49.028  1.00 48.05           N  
ATOM    932  N   ILE A 975      53.319  32.869  42.139  1.00 15.03           N  
ATOM    933  CA  ILE A 975      54.622  32.582  41.548  1.00 14.58           C  
ATOM    934  C   ILE A 975      55.550  33.711  41.981  1.00 16.80           C  
ATOM    935  O   ILE A 975      55.257  34.889  41.732  1.00 18.62           O  
ATOM    936  CB  ILE A 975      54.561  32.486  40.018  1.00 15.44           C  
ATOM    937  CG1 ILE A 975      53.480  31.482  39.578  1.00 20.60           C  
ATOM    938  CG2 ILE A 975      55.933  32.149  39.435  1.00 20.48           C  
ATOM    939  CD1 ILE A 975      53.323  31.356  38.076  1.00 17.61           C  
ATOM    940  N   ILE A 976      56.650  33.361  42.636  1.00 18.19           N  
ATOM    941  CA  ILE A 976      57.494  34.340  43.311  1.00 18.22           C  
ATOM    942  C   ILE A 976      58.890  34.296  42.704  1.00 17.65           C  
ATOM    943  O   ILE A 976      59.493  33.224  42.604  1.00 15.05           O  
ATOM    944  CB  ILE A 976      57.547  34.093  44.829  1.00 17.08           C  
ATOM    945  CG1 ILE A 976      56.134  34.055  45.427  1.00 20.49           C  
ATOM    946  CG2 ILE A 976      58.358  35.180  45.524  1.00 17.56           C  
ATOM    947  CD1 ILE A 976      55.999  33.047  46.528  1.00 24.44           C  
ATOM    948  N   TRP A 977      59.390  35.466  42.306  1.00 17.46           N  
ATOM    949  CA  TRP A 977      60.758  35.668  41.832  1.00 15.92           C  
ATOM    950  C   TRP A 977      61.564  36.327  42.947  1.00 16.95           C  
ATOM    951  O   TRP A 977      61.154  37.372  43.467  1.00 16.91           O  
ATOM    952  CB  TRP A 977      60.745  36.557  40.589  1.00 16.32           C  
ATOM    953  CG  TRP A 977      62.081  36.931  39.994  1.00 19.58           C  
ATOM    954  CD1 TRP A 977      62.644  38.183  39.952  1.00 17.83           C  
ATOM    955  CD2 TRP A 977      63.000  36.060  39.327  1.00 16.44           C  
ATOM    956  NE1 TRP A 977      63.859  38.137  39.294  1.00 18.18           N  
ATOM    957  CE2 TRP A 977      64.100  36.845  38.906  1.00 17.56           C  
ATOM    958  CE3 TRP A 977      63.000  34.692  39.035  1.00 16.43           C  
ATOM    959  CZ2 TRP A 977      65.178  36.305  38.211  1.00 17.09           C  
ATOM    960  CZ3 TRP A 977      64.087  34.157  38.339  1.00 16.20           C  
ATOM    961  CH2 TRP A 977      65.153  34.958  37.942  1.00 15.92           C  
ATOM    962  N   THR A 978      62.699  35.723  43.316  1.00 17.04           N  
ATOM    963  CA  THR A 978      63.559  36.250  44.377  1.00 19.19           C  
ATOM    964  C   THR A 978      64.988  36.459  43.881  1.00 19.97           C  
ATOM    965  O   THR A 978      65.586  35.558  43.288  1.00 16.96           O  
ATOM    966  CB  THR A 978      63.581  35.314  45.594  1.00 19.45           C  
ATOM    967  OG1 THR A 978      62.249  35.083  46.054  1.00 20.12           O  
ATOM    968  CG2 THR A 978      64.411  35.933  46.742  1.00 22.16           C  
ATOM    969  N   LEU A 979      65.528  37.646  44.119  1.00 18.47           N  
ATOM    970  CA  LEU A 979      66.940  37.930  43.905  1.00 16.55           C  
ATOM    971  C   LEU A 979      67.590  38.174  45.257  1.00 19.20           C  
ATOM    972  O   LEU A 979      66.974  38.775  46.143  1.00 20.84           O  
ATOM    973  CB  LEU A 979      67.135  39.163  43.023  1.00 17.85           C  
ATOM    974  CG  LEU A 979      66.518  39.155  41.632  1.00 17.08           C  
ATOM    975  CD1 LEU A 979      66.692  40.521  41.006  1.00 18.90           C  
ATOM    976  CD2 LEU A 979      67.151  38.071  40.753  1.00 17.57           C  
ATOM    977  N   GLN A 980      68.837  37.726  45.418  1.00 18.34           N  
ATOM    978  CA  GLN A 980      69.548  37.973  46.666  1.00 17.15           C  
ATOM    979  C   GLN A 980      71.007  38.283  46.368  1.00 16.05           C  
ATOM    980  O   GLN A 980      71.663  37.535  45.639  1.00 17.81           O  
ATOM    981  CB  GLN A 980      69.433  36.778  47.616  1.00 20.36           C  
ATOM    982  CG  GLN A 980      69.844  37.088  49.051  1.00 25.13           C  
ATOM    983  CD  GLN A 980      69.664  35.899  49.995  1.00 33.83           C  
ATOM    984  OE1 GLN A 980      69.402  34.776  49.562  1.00 29.90           O  
ATOM    985  NE2 GLN A 980      69.811  36.148  51.287  1.00 29.42           N  
ATOM    986  N   ASP A 981      71.514  39.386  46.920  1.00 16.01           N  
ATOM    987  CA  ASP A 981      72.882  39.766  46.603  1.00 18.16           C  
ATOM    988  C   ASP A 981      73.827  39.163  47.639  1.00 18.72           C  
ATOM    989  O   ASP A 981      73.398  38.518  48.595  1.00 19.08           O  
ATOM    990  CB  ASP A 981      73.015  41.290  46.468  1.00 17.96           C  
ATOM    991  CG  ASP A 981      72.861  42.047  47.774  1.00 21.29           C  
ATOM    992  OD1 ASP A 981      72.917  41.453  48.864  1.00 23.11           O  
ATOM    993  OD2 ASP A 981      72.718  43.293  47.698  1.00 24.69           O  
ATOM    994  N   THR A 982      75.136  39.365  47.449  1.00 20.09           N  
ATOM    995  CA  THR A 982      76.103  38.752  48.352  1.00 22.63           C  
ATOM    996  C   THR A 982      76.139  39.422  49.721  1.00 26.17           C  
ATOM    997  O   THR A 982      76.815  38.917  50.618  1.00 21.77           O  
ATOM    998  CB  THR A 982      77.510  38.774  47.737  1.00 21.25           C  
ATOM    999  OG1 THR A 982      77.888  40.126  47.460  1.00 21.45           O  
ATOM   1000  CG2 THR A 982      77.535  37.969  46.432  1.00 19.68           C  
ATOM   1001  N   GLU A 983      75.462  40.551  49.901  1.00 22.45           N  
ATOM   1002  CA  GLU A 983      75.305  41.118  51.232  1.00 23.32           C  
ATOM   1003  C   GLU A 983      74.057  40.604  51.935  1.00 27.40           C  
ATOM   1004  O   GLU A 983      73.780  41.023  53.060  1.00 32.39           O  
ATOM   1005  CB  GLU A 983      75.283  42.650  51.158  1.00 28.06           C  
ATOM   1006  CG  GLU A 983      76.655  43.277  50.889  1.00 30.02           C  
ATOM   1007  CD  GLU A 983      77.722  42.833  51.906  1.00 46.25           C  
ATOM   1008  OE1 GLU A 983      77.751  43.384  53.031  1.00 55.27           O  
ATOM   1009  OE2 GLU A 983      78.530  41.931  51.588  1.00 38.98           O  
ATOM   1010  N   GLY A 984      73.310  39.699  51.312  1.00 26.78           N  
ATOM   1011  CA  GLY A 984      72.128  39.130  51.921  1.00 26.54           C  
ATOM   1012  C   GLY A 984      70.851  39.909  51.691  1.00 28.68           C  
ATOM   1013  O   GLY A 984      69.806  39.507  52.211  1.00 33.45           O  
ATOM   1014  N   ILE A 985      70.898  41.004  50.930  1.00 26.15           N  
ATOM   1015  CA  ILE A 985      69.694  41.776  50.638  1.00 22.76           C  
ATOM   1016  C   ILE A 985      68.848  41.015  49.625  1.00 24.58           C  
ATOM   1017  O   ILE A 985      69.360  40.558  48.595  1.00 21.12           O  
ATOM   1018  CB  ILE A 985      70.059  43.168  50.106  1.00 22.08           C  
ATOM   1019  CG1 ILE A 985      71.097  43.846  51.010  1.00 31.19           C  
ATOM   1020  CG2 ILE A 985      68.814  44.028  49.990  1.00 25.67           C  
ATOM   1021  CD1 ILE A 985      70.646  43.994  52.448  1.00 38.44           C  
ATOM   1022  N   LYS A 986      67.551  40.888  49.908  1.00 22.30           N  
ATOM   1023  CA  LYS A 986      66.600  40.167  49.063  1.00 20.39           C  
ATOM   1024  C   LYS A 986      65.598  41.129  48.442  1.00 21.25           C  
ATOM   1025  O   LYS A 986      65.133  42.055  49.108  1.00 19.10           O  
ATOM   1026  CB  LYS A 986      65.785  39.138  49.858  1.00 26.73           C  
ATOM   1027  CG  LYS A 986      66.407  37.790  50.100  1.00 35.66           C  
ATOM   1028  CD  LYS A 986      65.398  36.875  50.811  1.00 32.56           C  
ATOM   1029  CE  LYS A 986      66.067  35.594  51.302  1.00 45.38           C  
ATOM   1030  NZ  LYS A 986      65.154  34.735  52.107  1.00 50.43           N  
ATOM   1031  N   LYS A 987      65.214  40.867  47.190  1.00 20.12           N  
ATOM   1032  CA  LYS A 987      64.060  41.511  46.572  1.00 21.90           C  
ATOM   1033  C   LYS A 987      63.154  40.422  46.004  1.00 21.96           C  
ATOM   1034  O   LYS A 987      63.642  39.417  45.488  1.00 19.65           O  
ATOM   1035  CB  LYS A 987      64.471  42.484  45.457  1.00 17.77           C  
ATOM   1036  CG  LYS A 987      65.391  43.647  45.912  1.00 23.21           C  
ATOM   1037  CD  LYS A 987      64.633  44.696  46.728  1.00 25.02           C  
ATOM   1038  CE  LYS A 987      65.597  45.755  47.281  1.00 28.47           C  
ATOM   1039  NZ  LYS A 987      64.873  46.790  48.047  1.00 31.43           N  
ATOM   1040  N   THR A 988      61.838  40.616  46.100  1.00 23.63           N  
ATOM   1041  CA  THR A 988      60.880  39.647  45.575  1.00 21.45           C  
ATOM   1042  C   THR A 988      59.834  40.351  44.730  1.00 23.24           C  
ATOM   1043  O   THR A 988      59.449  41.488  45.018  1.00 24.76           O  
ATOM   1044  CB  THR A 988      60.179  38.861  46.688  1.00 24.53           C  
ATOM   1045  OG1 THR A 988      59.492  39.768  47.556  1.00 31.52           O  
ATOM   1046  CG2 THR A 988      61.189  38.066  47.496  1.00 23.35           C  
ATOM   1047  N   VAL A 989      59.413  39.678  43.659  1.00 21.00           N  
ATOM   1048  CA  VAL A 989      58.368  40.145  42.757  1.00 20.50           C  
ATOM   1049  C   VAL A 989      57.391  38.993  42.595  1.00 18.95           C  
ATOM   1050  O   VAL A 989      57.820  37.855  42.382  1.00 16.06           O  
ATOM   1051  CB  VAL A 989      58.928  40.552  41.384  1.00 21.39           C  
ATOM   1052  CG1 VAL A 989      57.945  41.445  40.674  1.00 22.52           C  
ATOM   1053  CG2 VAL A 989      60.274  41.236  41.544  1.00 29.47           C  
ATOM   1054  N   VAL A 990      56.093  39.280  42.669  1.00 19.44           N  
ATOM   1055  CA  VAL A 990      55.079  38.236  42.785  1.00 18.10           C  
ATOM   1056  C   VAL A 990      54.053  38.369  41.665  1.00 19.44           C  
ATOM   1057  O   VAL A 990      53.612  39.480  41.339  1.00 15.82           O  
ATOM   1058  CB  VAL A 990      54.383  38.297  44.164  1.00 20.27           C  
ATOM   1059  CG1 VAL A 990      53.235  37.292  44.236  1.00 18.61           C  
ATOM   1060  CG2 VAL A 990      55.384  38.058  45.290  1.00 17.92           C  
ATOM   1061  N   PHE A 991      53.680  37.231  41.071  1.00 15.28           N  
ATOM   1062  CA  PHE A 991      52.452  37.103  40.292  1.00 15.84           C  
ATOM   1063  C   PHE A 991      51.493  36.226  41.085  1.00 17.29           C  
ATOM   1064  O   PHE A 991      51.900  35.190  41.610  1.00 14.94           O  
ATOM   1065  CB  PHE A 991      52.719  36.504  38.911  1.00 16.49           C  
ATOM   1066  CG  PHE A 991      51.475  35.962  38.215  1.00 17.88           C  
ATOM   1067  CD1 PHE A 991      50.450  36.815  37.813  1.00 18.48           C  
ATOM   1068  CD2 PHE A 991      51.353  34.608  37.942  1.00 17.16           C  
ATOM   1069  CE1 PHE A 991      49.315  36.325  37.167  1.00 20.47           C  
ATOM   1070  CE2 PHE A 991      50.221  34.106  37.288  1.00 16.75           C  
ATOM   1071  CZ  PHE A 991      49.203  34.965  36.903  1.00 16.45           C  
ATOM   1072  N   GLN A 992      50.235  36.654  41.217  1.00 13.82           N  
ATOM   1073  CA  GLN A 992      49.285  35.852  41.976  1.00 18.01           C  
ATOM   1074  C   GLN A 992      47.908  35.922  41.334  1.00 15.39           C  
ATOM   1075  O   GLN A 992      47.572  36.881  40.630  1.00 17.69           O  
ATOM   1076  CB  GLN A 992      49.219  36.289  43.448  1.00 19.50           C  
ATOM   1077  CG  GLN A 992      48.633  37.661  43.672  1.00 18.17           C  
ATOM   1078  CD  GLN A 992      48.652  38.064  45.136  1.00 29.42           C  
ATOM   1079  OE1 GLN A 992      49.673  37.959  45.801  1.00 32.56           O  
ATOM   1080  NE2 GLN A 992      47.520  38.532  45.639  1.00 26.42           N  
ATOM   1081  N   TYR A 993      47.118  34.877  41.573  1.00 15.42           N  
ATOM   1082  CA  TYR A 993      45.764  34.815  41.035  1.00 16.73           C  
ATOM   1083  C   TYR A 993      44.856  34.098  42.023  1.00 18.02           C  
ATOM   1084  O   TYR A 993      45.262  33.149  42.697  1.00 14.25           O  
ATOM   1085  CB  TYR A 993      45.721  34.143  39.648  1.00 15.95           C  
ATOM   1086  CG  TYR A 993      46.440  32.810  39.559  1.00 17.42           C  
ATOM   1087  CD1 TYR A 993      47.809  32.756  39.353  1.00 16.83           C  
ATOM   1088  CD2 TYR A 993      45.742  31.609  39.655  1.00 16.66           C  
ATOM   1089  CE1 TYR A 993      48.478  31.539  39.275  1.00 16.86           C  
ATOM   1090  CE2 TYR A 993      46.403  30.378  39.561  1.00 16.46           C  
ATOM   1091  CZ  TYR A 993      47.773  30.363  39.372  1.00 19.17           C  
ATOM   1092  OH  TYR A 993      48.445  29.162  39.278  1.00 21.01           O  
ATOM   1093  N   THR A 994      43.630  34.593  42.126  1.00 16.21           N  
ATOM   1094  CA  THR A 994      42.699  34.098  43.122  1.00 17.44           C  
ATOM   1095  C   THR A 994      42.085  32.775  42.679  1.00 16.93           C  
ATOM   1096  O   THR A 994      41.985  32.474  41.488  1.00 15.39           O  
ATOM   1097  CB  THR A 994      41.580  35.114  43.367  1.00 16.56           C  
ATOM   1098  OG1 THR A 994      40.752  34.675  44.452  1.00 16.64           O  
ATOM   1099  CG2 THR A 994      40.745  35.286  42.095  1.00 17.78           C  
ATOM   1100  N   GLN A 995      41.688  31.975  43.664  1.00 16.51           N  
ATOM   1101  CA  GLN A 995      40.846  30.818  43.411  1.00 14.81           C  
ATOM   1102  C   GLN A 995      39.379  31.107  43.732  1.00 15.94           C  
ATOM   1103  O   GLN A 995      38.548  30.201  43.651  1.00 14.98           O  
ATOM   1104  CB  GLN A 995      41.363  29.607  44.193  1.00 15.95           C  
ATOM   1105  CG  GLN A 995      42.770  29.174  43.741  1.00 14.83           C  
ATOM   1106  CD  GLN A 995      43.135  27.729  44.087  1.00 17.96           C  
ATOM   1107  OE1 GLN A 995      43.998  27.132  43.442  1.00 16.47           O  
ATOM   1108  NE2 GLN A 995      42.534  27.194  45.130  1.00 16.80           N  
ATOM   1109  N   ASN A 996      39.046  32.352  44.077  1.00 14.55           N  
ATOM   1110  CA  ASN A 996      37.648  32.788  44.222  1.00 15.40           C  
ATOM   1111  C   ASN A 996      37.258  33.505  42.931  1.00 14.58           C  
ATOM   1112  O   ASN A 996      37.355  34.730  42.822  1.00 16.27           O  
ATOM   1113  CB  ASN A 996      37.485  33.674  45.452  1.00 16.32           C  
ATOM   1114  CG  ASN A 996      36.045  34.106  45.678  1.00 23.82           C  
ATOM   1115  OD1 ASN A 996      35.152  33.739  44.922  1.00 22.13           O  
ATOM   1116  ND2 ASN A 996      35.818  34.891  46.727  1.00 24.76           N  
ATOM   1117  N   ILE A 997      36.797  32.730  41.946  1.00 19.07           N  
ATOM   1118  CA  ILE A 997      36.516  33.232  40.600  1.00 17.01           C  
ATOM   1119  C   ILE A 997      35.746  32.170  39.817  1.00 18.81           C  
ATOM   1120  O   ILE A 997      36.048  30.981  39.915  1.00 16.65           O  
ATOM   1121  CB  ILE A 997      37.824  33.610  39.882  1.00 18.31           C  
ATOM   1122  CG1 ILE A 997      37.548  34.199  38.497  1.00 20.28           C  
ATOM   1123  CG2 ILE A 997      38.747  32.409  39.806  1.00 18.04           C  
ATOM   1124  CD1 ILE A 997      38.711  34.971  37.927  1.00 19.46           C  
ATOM   1125  N   ASN A 998      34.750  32.586  39.031  1.00 19.10           N  
ATOM   1126  CA  ASN A 998      33.911  31.610  38.338  1.00 19.75           C  
ATOM   1127  C   ASN A 998      34.730  30.777  37.358  1.00 18.11           C  
ATOM   1128  O   ASN A 998      34.715  29.543  37.413  1.00 19.40           O  
ATOM   1129  CB  ASN A 998      32.761  32.311  37.626  1.00 17.29           C  
ATOM   1130  CG  ASN A 998      31.656  32.751  38.586  1.00 23.14           C  
ATOM   1131  OD1 ASN A 998      31.738  32.546  39.794  1.00 23.70           O  
ATOM   1132  ND2 ASN A 998      30.616  33.359  38.039  1.00 30.71           N  
ATOM   1133  N   ILE A 999      35.433  31.435  36.437  1.00 16.35           N  
ATOM   1134  CA  ILE A 999      36.316  30.754  35.494  1.00 16.87           C  
ATOM   1135  C   ILE A 999      37.623  31.540  35.416  1.00 19.61           C  
ATOM   1136  O   ILE A 999      37.616  32.721  35.055  1.00 17.95           O  
ATOM   1137  CB  ILE A 999      35.679  30.616  34.107  1.00 20.07           C  
ATOM   1138  CG1 ILE A 999      34.401  29.752  34.219  1.00 23.05           C  
ATOM   1139  CG2 ILE A 999      36.662  29.968  33.140  1.00 17.85           C  
ATOM   1140  CD1 ILE A 999      33.540  29.833  33.049  1.00 26.40           C  
ATOM   1141  N   SER A1000      38.735  30.894  35.759  1.00 16.27           N  
ATOM   1142  CA  SER A1000      40.028  31.580  35.842  1.00 17.84           C  
ATOM   1143  C   SER A1000      40.795  31.473  34.531  1.00 15.80           C  
ATOM   1144  O   SER A1000      40.788  30.422  33.888  1.00 17.39           O  
ATOM   1145  CB  SER A1000      40.862  30.980  36.973  1.00 15.65           C  
ATOM   1146  OG  SER A1000      42.189  31.473  36.964  1.00 18.07           O  
ATOM   1147  N   ASP A1001      41.474  32.566  34.146  1.00 17.41           N  
ATOM   1148  CA  ASP A1001      42.464  32.510  33.071  1.00 18.39           C  
ATOM   1149  C   ASP A1001      43.681  31.660  33.435  1.00 16.75           C  
ATOM   1150  O   ASP A1001      44.457  31.318  32.541  1.00 17.19           O  
ATOM   1151  CB  ASP A1001      42.978  33.923  32.697  1.00 19.25           C  
ATOM   1152  CG  ASP A1001      41.899  34.816  32.072  1.00 29.77           C  
ATOM   1153  OD1 ASP A1001      40.848  34.300  31.649  1.00 26.77           O  
ATOM   1154  OD2 ASP A1001      42.114  36.044  32.000  1.00 32.86           O  
ATOM   1155  N   TYR A1002      43.873  31.326  34.711  1.00 17.10           N  
ATOM   1156  CA  TYR A1002      45.159  30.820  35.192  1.00 16.30           C  
ATOM   1157  C   TYR A1002      45.117  29.459  35.875  1.00 15.97           C  
ATOM   1158  O   TYR A1002      46.063  28.682  35.700  1.00 14.76           O  
ATOM   1159  CB  TYR A1002      45.777  31.836  36.159  1.00 15.82           C  
ATOM   1160  CG  TYR A1002      45.934  33.181  35.506  1.00 15.04           C  
ATOM   1161  CD1 TYR A1002      46.721  33.328  34.371  1.00 15.52           C  
ATOM   1162  CD2 TYR A1002      45.284  34.301  36.012  1.00 18.54           C  
ATOM   1163  CE1 TYR A1002      46.870  34.561  33.762  1.00 19.45           C  
ATOM   1164  CE2 TYR A1002      45.430  35.532  35.412  1.00 19.96           C  
ATOM   1165  CZ  TYR A1002      46.217  35.652  34.288  1.00 21.75           C  
ATOM   1166  OH  TYR A1002      46.341  36.873  33.685  1.00 25.77           O  
ATOM   1167  N   ILE A1003      44.081  29.154  36.666  1.00 15.12           N  
ATOM   1168  CA  ILE A1003      44.127  27.946  37.501  1.00 18.29           C  
ATOM   1169  C   ILE A1003      44.252  26.718  36.615  1.00 17.40           C  
ATOM   1170  O   ILE A1003      43.364  26.430  35.805  1.00 15.00           O  
ATOM   1171  CB  ILE A1003      42.890  27.825  38.394  1.00 14.19           C  
ATOM   1172  CG1 ILE A1003      42.705  29.051  39.288  1.00 13.30           C  
ATOM   1173  CG2 ILE A1003      43.005  26.548  39.270  1.00 12.70           C  
ATOM   1174  CD1 ILE A1003      41.301  29.091  39.925  1.00 16.81           C  
ATOM   1175  N   ASN A1004      45.351  25.983  36.780  1.00 13.41           N  
ATOM   1176  CA  ASN A1004      45.582  24.703  36.113  1.00 13.17           C  
ATOM   1177  C   ASN A1004      45.673  24.849  34.601  1.00 15.63           C  
ATOM   1178  O   ASN A1004      45.544  23.866  33.876  1.00 16.71           O  
ATOM   1179  CB  ASN A1004      44.502  23.667  36.482  1.00 14.34           C  
ATOM   1180  CG  ASN A1004      44.924  22.243  36.151  1.00 15.62           C  
ATOM   1181  OD1 ASN A1004      46.058  21.849  36.416  1.00 15.31           O  
ATOM   1182  ND2 ASN A1004      44.016  21.475  35.544  1.00 17.05           N  
ATOM   1183  N   ARG A1005      45.927  26.057  34.099  1.00 15.18           N  
ATOM   1184  CA  ARG A1005      46.068  26.293  32.674  1.00 13.97           C  
ATOM   1185  C   ARG A1005      47.488  26.765  32.382  1.00 16.50           C  
ATOM   1186  O   ARG A1005      48.142  27.348  33.247  1.00 16.48           O  
ATOM   1187  CB  ARG A1005      45.039  27.343  32.177  1.00 13.63           C  
ATOM   1188  CG  ARG A1005      43.596  27.050  32.567  1.00 17.05           C  
ATOM   1189  CD  ARG A1005      42.656  28.210  32.186  1.00 17.78           C  
ATOM   1190  NE  ARG A1005      42.350  28.227  30.756  1.00 18.37           N  
ATOM   1191  CZ  ARG A1005      41.480  29.057  30.185  1.00 19.75           C  
ATOM   1192  NH1 ARG A1005      40.851  29.978  30.914  1.00 17.08           N  
ATOM   1193  NH2 ARG A1005      41.261  28.985  28.883  1.00 20.47           N  
ATOM   1194  N   TRP A1006      47.980  26.479  31.176  1.00 15.46           N  
ATOM   1195  CA  TRP A1006      49.339  26.896  30.831  1.00 15.80           C  
ATOM   1196  C   TRP A1006      49.466  28.418  30.925  1.00 18.69           C  
ATOM   1197  O   TRP A1006      48.611  29.151  30.423  1.00 17.74           O  
ATOM   1198  CB  TRP A1006      49.703  26.428  29.424  1.00 14.86           C  
ATOM   1199  CG  TRP A1006      50.143  24.983  29.384  1.00 16.84           C  
ATOM   1200  CD1 TRP A1006      49.417  23.909  28.926  1.00 16.66           C  
ATOM   1201  CD2 TRP A1006      51.399  24.458  29.839  1.00 14.60           C  
ATOM   1202  NE1 TRP A1006      50.151  22.749  29.074  1.00 18.25           N  
ATOM   1203  CE2 TRP A1006      51.371  23.063  29.626  1.00 17.57           C  
ATOM   1204  CE3 TRP A1006      52.543  25.034  30.419  1.00 15.98           C  
ATOM   1205  CZ2 TRP A1006      52.446  22.237  29.962  1.00 19.03           C  
ATOM   1206  CZ3 TRP A1006      53.617  24.210  30.747  1.00 16.17           C  
ATOM   1207  CH2 TRP A1006      53.563  22.832  30.513  1.00 18.97           C  
ATOM   1208  N   ILE A1007      50.529  28.883  31.589  1.00 15.51           N  
ATOM   1209  CA  ILE A1007      50.843  30.305  31.755  1.00 18.55           C  
ATOM   1210  C   ILE A1007      52.223  30.561  31.160  1.00 18.63           C  
ATOM   1211  O   ILE A1007      53.173  29.844  31.478  1.00 15.81           O  
ATOM   1212  CB  ILE A1007      50.828  30.717  33.241  1.00 15.99           C  
ATOM   1213  CG1 ILE A1007      49.501  30.321  33.913  1.00 15.90           C  
ATOM   1214  CG2 ILE A1007      51.131  32.237  33.403  1.00 18.81           C  
ATOM   1215  CD1 ILE A1007      49.514  30.492  35.443  1.00 17.61           C  
ATOM   1216  N   PHE A1008      52.344  31.573  30.305  1.00 17.56           N  
ATOM   1217  CA  PHE A1008      53.656  31.983  29.821  1.00 17.82           C  
ATOM   1218  C   PHE A1008      54.209  33.067  30.741  1.00 15.79           C  
ATOM   1219  O   PHE A1008      53.599  34.133  30.896  1.00 16.60           O  
ATOM   1220  CB  PHE A1008      53.605  32.465  28.375  1.00 14.73           C  
ATOM   1221  CG  PHE A1008      54.943  32.930  27.847  1.00 19.99           C  
ATOM   1222  CD1 PHE A1008      56.037  32.075  27.833  1.00 17.76           C  
ATOM   1223  CD2 PHE A1008      55.104  34.223  27.380  1.00 18.90           C  
ATOM   1224  CE1 PHE A1008      57.275  32.504  27.356  1.00 18.76           C  
ATOM   1225  CE2 PHE A1008      56.338  34.657  26.896  1.00 21.87           C  
ATOM   1226  CZ  PHE A1008      57.420  33.788  26.884  1.00 18.49           C  
ATOM   1227  N   VAL A1009      55.359  32.791  31.355  1.00 16.22           N  
ATOM   1228  CA  VAL A1009      55.990  33.693  32.315  1.00 14.32           C  
ATOM   1229  C   VAL A1009      57.256  34.259  31.680  1.00 17.37           C  
ATOM   1230  O   VAL A1009      58.030  33.519  31.065  1.00 19.79           O  
ATOM   1231  CB  VAL A1009      56.324  32.971  33.636  1.00 17.05           C  
ATOM   1232  CG1 VAL A1009      56.891  33.927  34.643  1.00 18.70           C  
ATOM   1233  CG2 VAL A1009      55.087  32.229  34.217  1.00 15.55           C  
ATOM   1234  N   THR A1010      57.456  35.569  31.812  1.00 14.19           N  
ATOM   1235  CA  THR A1010      58.712  36.215  31.442  1.00 16.03           C  
ATOM   1236  C   THR A1010      59.086  37.178  32.549  1.00 14.36           C  
ATOM   1237  O   THR A1010      58.271  38.014  32.948  1.00 18.63           O  
ATOM   1238  CB  THR A1010      58.612  36.984  30.125  1.00 16.74           C  
ATOM   1239  OG1 THR A1010      57.983  36.160  29.143  1.00 19.24           O  
ATOM   1240  CG2 THR A1010      60.023  37.400  29.635  1.00 18.17           C  
ATOM   1241  N   ILE A1011      60.312  37.067  33.040  1.00 15.30           N  
ATOM   1242  CA  ILE A1011      60.809  37.915  34.114  1.00 14.20           C  
ATOM   1243  C   ILE A1011      62.055  38.635  33.603  1.00 17.49           C  
ATOM   1244  O   ILE A1011      63.027  37.987  33.204  1.00 16.19           O  
ATOM   1245  CB  ILE A1011      61.116  37.094  35.374  1.00 14.65           C  
ATOM   1246  CG1 ILE A1011      59.878  36.279  35.776  1.00 19.26           C  
ATOM   1247  CG2 ILE A1011      61.577  37.987  36.497  1.00 15.15           C  
ATOM   1248  CD1 ILE A1011      60.129  35.235  36.831  1.00 16.88           C  
ATOM   1249  N   THR A1012      62.020  39.966  33.595  1.00 18.30           N  
ATOM   1250  CA  THR A1012      63.163  40.760  33.159  1.00 17.15           C  
ATOM   1251  C   THR A1012      63.732  41.526  34.342  1.00 18.02           C  
ATOM   1252  O   THR A1012      63.011  41.877  35.278  1.00 20.09           O  
ATOM   1253  CB  THR A1012      62.795  41.732  32.035  1.00 19.14           C  
ATOM   1254  OG1 THR A1012      61.926  42.757  32.542  1.00 19.59           O  
ATOM   1255  CG2 THR A1012      62.110  40.984  30.887  1.00 18.62           C  
ATOM   1256  N   ASN A1013      65.044  41.756  34.312  1.00 15.63           N  
ATOM   1257  CA  ASN A1013      65.737  42.390  35.423  1.00 17.55           C  
ATOM   1258  C   ASN A1013      66.628  43.492  34.873  1.00 17.10           C  
ATOM   1259  O   ASN A1013      67.541  43.220  34.087  1.00 16.72           O  
ATOM   1260  CB  ASN A1013      66.557  41.377  36.214  1.00 15.95           C  
ATOM   1261  CG  ASN A1013      65.699  40.230  36.733  1.00 18.03           C  
ATOM   1262  OD1 ASN A1013      65.115  40.326  37.796  1.00 16.88           O  
ATOM   1263  ND2 ASN A1013      65.628  39.148  35.970  1.00 15.96           N  
ATOM   1264  N   ASN A1014      66.330  44.721  35.261  1.00 16.30           N  
ATOM   1265  CA  ASN A1014      67.121  45.898  34.909  1.00 20.33           C  
ATOM   1266  C   ASN A1014      67.783  46.368  36.192  1.00 16.27           C  
ATOM   1267  O   ASN A1014      67.112  46.894  37.083  1.00 18.58           O  
ATOM   1268  CB  ASN A1014      66.244  46.993  34.298  1.00 19.97           C  
ATOM   1269  CG  ASN A1014      67.060  48.178  33.766  1.00 23.08           C  
ATOM   1270  OD1 ASN A1014      68.061  48.569  34.352  1.00 20.95           O  
ATOM   1271  ND2 ASN A1014      66.611  48.755  32.656  1.00 29.06           N  
ATOM   1272  N   ARG A1015      69.095  46.154  36.294  1.00 17.98           N  
ATOM   1273  CA  ARG A1015      69.797  46.447  37.535  1.00 18.10           C  
ATOM   1274  C   ARG A1015      69.735  47.929  37.905  1.00 21.22           C  
ATOM   1275  O   ARG A1015      69.890  48.265  39.080  1.00 20.79           O  
ATOM   1276  CB  ARG A1015      71.253  45.982  37.426  1.00 19.30           C  
ATOM   1277  CG  ARG A1015      71.397  44.489  37.061  1.00 16.42           C  
ATOM   1278  CD  ARG A1015      70.693  43.558  38.069  1.00 16.38           C  
ATOM   1279  NE  ARG A1015      71.023  43.922  39.435  1.00 19.78           N  
ATOM   1280  CZ  ARG A1015      72.021  43.401  40.147  1.00 18.90           C  
ATOM   1281  NH1 ARG A1015      72.797  42.459  39.633  1.00 15.32           N  
ATOM   1282  NH2 ARG A1015      72.246  43.841  41.382  1.00 18.10           N  
ATOM   1283  N   LEU A1016      69.476  48.806  36.935  1.00 20.66           N  
ATOM   1284  CA  LEU A1016      69.288  50.227  37.212  1.00 23.86           C  
ATOM   1285  C   LEU A1016      67.950  50.540  37.857  1.00 27.39           C  
ATOM   1286  O   LEU A1016      67.813  51.596  38.482  1.00 29.30           O  
ATOM   1287  CB  LEU A1016      69.379  51.030  35.923  1.00 24.84           C  
ATOM   1288  CG  LEU A1016      70.681  51.581  35.380  1.00 37.37           C  
ATOM   1289  CD1 LEU A1016      70.342  52.276  34.078  1.00 35.43           C  
ATOM   1290  CD2 LEU A1016      71.331  52.548  36.368  1.00 27.70           C  
ATOM   1291  N   SER A1017      66.947  49.679  37.685  1.00 23.70           N  
ATOM   1292  CA  SER A1017      65.609  50.037  38.127  1.00 24.03           C  
ATOM   1293  C   SER A1017      64.823  48.830  38.635  1.00 21.22           C  
ATOM   1294  O   SER A1017      64.929  48.489  39.816  1.00 22.43           O  
ATOM   1295  CB  SER A1017      64.865  50.753  36.997  1.00 26.43           C  
ATOM   1296  OG  SER A1017      64.906  50.016  35.791  1.00 29.16           O  
ATOM   1297  N   ASN A1018      64.064  48.163  37.762  1.00 22.67           N  
ATOM   1298  CA  ASN A1018      63.017  47.234  38.179  1.00 20.10           C  
ATOM   1299  C   ASN A1018      63.236  45.821  37.664  1.00 17.72           C  
ATOM   1300  O   ASN A1018      63.762  45.614  36.572  1.00 20.18           O  
ATOM   1301  CB  ASN A1018      61.642  47.673  37.662  1.00 20.35           C  
ATOM   1302  CG  ASN A1018      61.162  48.928  38.308  1.00 24.75           C  
ATOM   1303  OD1 ASN A1018      61.415  49.165  39.486  1.00 25.25           O  
ATOM   1304  ND2 ASN A1018      60.471  49.759  37.536  1.00 27.88           N  
ATOM   1305  N   SER A1019      62.778  44.859  38.457  1.00 20.40           N  
ATOM   1306  CA  SER A1019      62.439  43.532  37.963  1.00 17.01           C  
ATOM   1307  C   SER A1019      60.959  43.541  37.582  1.00 15.45           C  
ATOM   1308  O   SER A1019      60.137  44.100  38.309  1.00 18.09           O  
ATOM   1309  CB  SER A1019      62.718  42.477  39.034  1.00 20.24           C  
ATOM   1310  OG  SER A1019      62.326  41.175  38.603  1.00 23.88           O  
ATOM   1311  N   LYS A1020      60.633  42.949  36.433  1.00 17.81           N  
ATOM   1312  CA  LYS A1020      59.282  42.971  35.880  1.00 17.07           C  
ATOM   1313  C   LYS A1020      58.815  41.546  35.611  1.00 19.73           C  
ATOM   1314  O   LYS A1020      59.581  40.740  35.089  1.00 18.42           O  
ATOM   1315  CB  LYS A1020      59.247  43.768  34.573  1.00 17.13           C  
ATOM   1316  CG  LYS A1020      59.673  45.242  34.711  1.00 21.66           C  
ATOM   1317  CD  LYS A1020      59.669  45.950  33.355  1.00 21.67           C  
ATOM   1318  CE  LYS A1020      59.883  47.445  33.535  1.00 31.74           C  
ATOM   1319  NZ  LYS A1020      59.991  48.150  32.233  1.00 33.18           N  
ATOM   1320  N   ILE A1021      57.553  41.247  35.923  1.00 17.32           N  
ATOM   1321  CA  ILE A1021      56.940  39.976  35.535  1.00 17.85           C  
ATOM   1322  C   ILE A1021      55.924  40.239  34.434  1.00 16.97           C  
ATOM   1323  O   ILE A1021      54.978  41.022  34.613  1.00 20.37           O  
ATOM   1324  CB  ILE A1021      56.272  39.258  36.718  1.00 15.95           C  
ATOM   1325  CG1 ILE A1021      57.299  38.962  37.811  1.00 16.47           C  
ATOM   1326  CG2 ILE A1021      55.645  37.944  36.219  1.00 17.04           C  
ATOM   1327  CD1 ILE A1021      56.722  38.393  39.076  1.00 19.47           C  
ATOM   1328  N   TYR A1022      56.098  39.555  33.318  1.00 15.16           N  
ATOM   1329  CA  TYR A1022      55.112  39.514  32.252  1.00 15.96           C  
ATOM   1330  C   TYR A1022      54.391  38.170  32.286  1.00 17.43           C  
ATOM   1331  O   TYR A1022      55.006  37.134  32.538  1.00 16.31           O  
ATOM   1332  CB  TYR A1022      55.773  39.692  30.894  1.00 15.17           C  
ATOM   1333  CG  TYR A1022      56.480  41.007  30.683  1.00 18.33           C  
ATOM   1334  CD1 TYR A1022      57.663  41.303  31.346  1.00 17.54           C  
ATOM   1335  CD2 TYR A1022      55.979  41.936  29.778  1.00 18.78           C  
ATOM   1336  CE1 TYR A1022      58.337  42.531  31.122  1.00 16.86           C  
ATOM   1337  CE2 TYR A1022      56.624  43.150  29.556  1.00 21.44           C  
ATOM   1338  CZ  TYR A1022      57.797  43.443  30.226  1.00 23.74           C  
ATOM   1339  OH  TYR A1022      58.425  44.654  29.996  1.00 21.30           O  
ATOM   1340  N   ILE A1023      53.088  38.191  32.016  1.00 17.96           N  
ATOM   1341  CA  ILE A1023      52.255  36.988  32.045  1.00 15.43           C  
ATOM   1342  C   ILE A1023      51.484  36.945  30.736  1.00 19.26           C  
ATOM   1343  O   ILE A1023      50.739  37.882  30.424  1.00 17.54           O  
ATOM   1344  CB  ILE A1023      51.293  36.972  33.245  1.00 19.88           C  
ATOM   1345  CG1 ILE A1023      52.066  36.865  34.560  1.00 13.97           C  
ATOM   1346  CG2 ILE A1023      50.288  35.810  33.114  1.00 18.60           C  
ATOM   1347  CD1 ILE A1023      52.881  35.560  34.677  1.00 16.06           C  
ATOM   1348  N   ASN A1024      51.690  35.884  29.961  1.00 17.82           N  
ATOM   1349  CA  ASN A1024      51.102  35.766  28.634  1.00 19.84           C  
ATOM   1350  C   ASN A1024      51.380  37.009  27.796  1.00 24.12           C  
ATOM   1351  O   ASN A1024      50.519  37.502  27.061  1.00 18.86           O  
ATOM   1352  CB  ASN A1024      49.608  35.472  28.733  1.00 20.07           C  
ATOM   1353  CG  ASN A1024      49.346  34.138  29.389  1.00 18.12           C  
ATOM   1354  OD1 ASN A1024      50.179  33.235  29.310  1.00 17.35           O  
ATOM   1355  ND2 ASN A1024      48.197  34.003  30.045  1.00 18.02           N  
ATOM   1356  N   GLY A1025      52.603  37.518  27.916  1.00 20.78           N  
ATOM   1357  CA  GLY A1025      53.067  38.599  27.081  1.00 24.42           C  
ATOM   1358  C   GLY A1025      52.767  39.986  27.597  1.00 22.79           C  
ATOM   1359  O   GLY A1025      53.108  40.960  26.921  1.00 29.25           O  
ATOM   1360  N   ARG A1026      52.176  40.113  28.781  1.00 22.10           N  
ATOM   1361  CA  ARG A1026      51.666  41.384  29.276  1.00 25.77           C  
ATOM   1362  C   ARG A1026      52.287  41.727  30.625  1.00 22.19           C  
ATOM   1363  O   ARG A1026      52.245  40.921  31.558  1.00 17.41           O  
ATOM   1364  CB  ARG A1026      50.136  41.315  29.367  1.00 23.42           C  
ATOM   1365  CG  ARG A1026      49.439  42.651  29.377  1.00 37.35           C  
ATOM   1366  CD  ARG A1026      48.026  42.475  29.906  1.00 44.21           C  
ATOM   1367  NE  ARG A1026      47.475  43.766  30.329  1.00 50.30           N  
ATOM   1368  CZ  ARG A1026      47.087  44.050  31.561  1.00 35.80           C  
ATOM   1369  NH1 ARG A1026      47.197  43.131  32.500  1.00 38.97           N  
ATOM   1370  NH2 ARG A1026      46.600  45.242  31.825  1.00 38.56           N  
ATOM   1371  N   LEU A1027      52.836  42.945  30.742  1.00 21.04           N  
ATOM   1372  CA  LEU A1027      53.458  43.365  31.995  1.00 21.02           C  
ATOM   1373  C   LEU A1027      52.418  43.441  33.110  1.00 24.15           C  
ATOM   1374  O   LEU A1027      51.430  44.170  32.984  1.00 22.54           O  
ATOM   1375  CB  LEU A1027      54.135  44.721  31.811  1.00 16.89           C  
ATOM   1376  CG  LEU A1027      54.818  45.306  33.048  1.00 21.76           C  
ATOM   1377  CD1 LEU A1027      55.864  44.338  33.598  1.00 19.36           C  
ATOM   1378  CD2 LEU A1027      55.462  46.658  32.705  1.00 24.37           C  
ATOM   1379  N   ILE A1028      52.631  42.720  34.214  1.00 18.54           N  
ATOM   1380  CA  ILE A1028      51.640  42.771  35.284  1.00 18.61           C  
ATOM   1381  C   ILE A1028      52.218  43.144  36.641  1.00 20.47           C  
ATOM   1382  O   ILE A1028      51.464  43.366  37.593  1.00 20.51           O  
ATOM   1383  CB  ILE A1028      50.850  41.450  35.393  1.00 22.48           C  
ATOM   1384  CG1 ILE A1028      51.792  40.251  35.538  1.00 20.53           C  
ATOM   1385  CG2 ILE A1028      49.904  41.291  34.194  1.00 20.23           C  
ATOM   1386  CD1 ILE A1028      52.266  39.983  36.960  1.00 18.38           C  
ATOM   1387  N   ASN A1029      53.538  43.221  36.766  1.00 18.35           N  
ATOM   1388  CA  ASN A1029      54.066  43.667  38.045  1.00 21.83           C  
ATOM   1389  C   ASN A1029      55.501  44.132  37.853  1.00 23.36           C  
ATOM   1390  O   ASN A1029      56.230  43.589  37.023  1.00 22.48           O  
ATOM   1391  CB  ASN A1029      54.008  42.555  39.102  1.00 19.87           C  
ATOM   1392  CG  ASN A1029      54.186  43.087  40.494  1.00 24.27           C  
ATOM   1393  OD1 ASN A1029      54.109  44.290  40.705  1.00 29.42           O  
ATOM   1394  ND2 ASN A1029      54.408  42.206  41.456  1.00 23.37           N  
ATOM   1395  N   GLU A1030      55.896  45.139  38.628  1.00 21.95           N  
ATOM   1396  CA  GLU A1030      57.279  45.598  38.645  1.00 21.71           C  
ATOM   1397  C   GLU A1030      57.669  45.973  40.070  1.00 26.12           C  
ATOM   1398  O   GLU A1030      56.839  46.455  40.848  1.00 24.28           O  
ATOM   1399  CB  GLU A1030      57.509  46.761  37.661  1.00 23.26           C  
ATOM   1400  CG  GLU A1030      56.591  47.936  37.767  1.00 34.15           C  
ATOM   1401  CD  GLU A1030      56.598  48.821  36.518  1.00 38.35           C  
ATOM   1402  OE1 GLU A1030      57.387  48.560  35.587  1.00 41.36           O  
ATOM   1403  OE2 GLU A1030      55.802  49.782  36.462  1.00 34.77           O  
ATOM   1404  N   GLU A1031      58.925  45.691  40.420  1.00 19.04           N  
ATOM   1405  CA  GLU A1031      59.457  45.955  41.748  1.00 21.82           C  
ATOM   1406  C   GLU A1031      60.870  46.510  41.604  1.00 21.99           C  
ATOM   1407  O   GLU A1031      61.655  45.995  40.809  1.00 19.47           O  
ATOM   1408  CB  GLU A1031      59.456  44.679  42.594  1.00 24.11           C  
ATOM   1409  CG  GLU A1031      60.286  44.736  43.856  1.00 28.32           C  
ATOM   1410  CD  GLU A1031      59.534  45.371  45.011  1.00 39.35           C  
ATOM   1411  OE1 GLU A1031      60.154  45.556  46.087  1.00 44.89           O  
ATOM   1412  OE2 GLU A1031      58.325  45.677  44.834  1.00 37.79           O  
ATOM   1413  N   SER A1032      61.191  47.563  42.358  1.00 20.20           N  
ATOM   1414  CA  SER A1032      62.524  48.155  42.250  1.00 23.15           C  
ATOM   1415  C   SER A1032      63.589  47.209  42.779  1.00 17.28           C  
ATOM   1416  O   SER A1032      63.473  46.709  43.896  1.00 22.59           O  
ATOM   1417  CB  SER A1032      62.613  49.470  43.025  1.00 23.47           C  
ATOM   1418  OG  SER A1032      63.977  49.880  43.031  1.00 29.69           O  
ATOM   1419  N   ILE A1033      64.656  46.998  42.002  1.00 22.44           N  
ATOM   1420  CA  ILE A1033      65.797  46.209  42.458  1.00 18.88           C  
ATOM   1421  C   ILE A1033      67.102  47.011  42.448  1.00 23.95           C  
ATOM   1422  O   ILE A1033      68.177  46.435  42.616  1.00 23.57           O  
ATOM   1423  CB  ILE A1033      65.972  44.923  41.625  1.00 19.34           C  
ATOM   1424  CG1 ILE A1033      66.256  45.282  40.167  1.00 19.55           C  
ATOM   1425  CG2 ILE A1033      64.762  43.988  41.757  1.00 17.48           C  
ATOM   1426  CD1 ILE A1033      66.845  44.134  39.341  1.00 17.43           C  
ATOM   1427  N   SER A1034      67.038  48.324  42.233  1.00 22.92           N  
ATOM   1428  CA  SER A1034      68.266  49.085  42.007  1.00 24.72           C  
ATOM   1429  C   SER A1034      69.183  49.119  43.224  1.00 24.77           C  
ATOM   1430  O   SER A1034      70.379  49.382  43.068  1.00 32.19           O  
ATOM   1431  CB  SER A1034      67.930  50.512  41.576  1.00 31.79           C  
ATOM   1432  OG  SER A1034      67.124  51.122  42.550  1.00 30.80           O  
ATOM   1433  N   ASP A1035      68.669  48.862  44.424  1.00 27.68           N  
ATOM   1434  CA  ASP A1035      69.524  48.870  45.604  1.00 31.14           C  
ATOM   1435  C   ASP A1035      70.320  47.584  45.786  1.00 28.93           C  
ATOM   1436  O   ASP A1035      71.166  47.534  46.684  1.00 26.85           O  
ATOM   1437  CB  ASP A1035      68.704  49.093  46.871  1.00 30.42           C  
ATOM   1438  CG  ASP A1035      68.293  50.536  47.069  1.00 34.42           C  
ATOM   1439  OD1 ASP A1035      68.748  51.434  46.312  1.00 39.10           O  
ATOM   1440  OD2 ASP A1035      67.505  50.760  48.010  1.00 39.60           O  
ATOM   1441  N   LEU A1036      70.061  46.541  44.997  1.00 21.96           N  
ATOM   1442  CA  LEU A1036      70.807  45.298  45.164  1.00 18.47           C  
ATOM   1443  C   LEU A1036      72.255  45.487  44.727  1.00 20.20           C  
ATOM   1444  O   LEU A1036      72.538  46.170  43.742  1.00 20.86           O  
ATOM   1445  CB  LEU A1036      70.171  44.166  44.349  1.00 20.74           C  
ATOM   1446  CG  LEU A1036      68.896  43.558  44.929  1.00 22.71           C  
ATOM   1447  CD1 LEU A1036      68.351  42.488  44.001  1.00 21.51           C  
ATOM   1448  CD2 LEU A1036      69.158  42.990  46.306  1.00 24.11           C  
ATOM   1449  N   GLY A1037      73.169  44.855  45.458  1.00 21.69           N  
ATOM   1450  CA  GLY A1037      74.570  44.852  45.094  1.00 16.88           C  
ATOM   1451  C   GLY A1037      74.937  43.727  44.141  1.00 18.13           C  
ATOM   1452  O   GLY A1037      74.190  43.394  43.217  1.00 21.28           O  
ATOM   1453  N   ASN A1038      76.101  43.131  44.347  1.00 17.98           N  
ATOM   1454  CA  ASN A1038      76.552  42.060  43.467  1.00 18.99           C  
ATOM   1455  C   ASN A1038      75.731  40.792  43.702  1.00 16.09           C  
ATOM   1456  O   ASN A1038      75.507  40.394  44.845  1.00 19.37           O  
ATOM   1457  CB  ASN A1038      78.033  41.791  43.712  1.00 19.10           C  
ATOM   1458  CG  ASN A1038      78.644  40.946  42.634  1.00 17.90           C  
ATOM   1459  OD1 ASN A1038      78.817  41.394  41.500  1.00 20.91           O  
ATOM   1460  ND2 ASN A1038      78.999  39.732  42.982  1.00 17.96           N  
ATOM   1461  N   ILE A1039      75.271  40.168  42.623  1.00 17.42           N  
ATOM   1462  CA  ILE A1039      74.514  38.916  42.686  1.00 18.68           C  
ATOM   1463  C   ILE A1039      75.399  37.832  42.092  1.00 16.99           C  
ATOM   1464  O   ILE A1039      75.750  37.886  40.910  1.00 18.35           O  
ATOM   1465  CB  ILE A1039      73.176  39.003  41.929  1.00 17.65           C  
ATOM   1466  CG1 ILE A1039      72.240  40.032  42.565  1.00 19.78           C  
ATOM   1467  CG2 ILE A1039      72.506  37.601  41.827  1.00 14.75           C  
ATOM   1468  CD1 ILE A1039      70.963  40.266  41.763  1.00 18.96           C  
ATOM   1469  N   HIS A1040      75.760  36.859  42.900  1.00 17.16           N  
ATOM   1470  CA  HIS A1040      76.652  35.790  42.473  1.00 19.36           C  
ATOM   1471  C   HIS A1040      75.846  34.491  42.479  1.00 16.77           C  
ATOM   1472  O   HIS A1040      75.698  33.849  43.518  1.00 19.52           O  
ATOM   1473  CB  HIS A1040      77.875  35.723  43.384  1.00 16.95           C  
ATOM   1474  CG  HIS A1040      78.931  34.773  42.911  1.00 21.29           C  
ATOM   1475  ND1 HIS A1040      80.209  34.767  43.426  1.00 27.31           N  
ATOM   1476  CD2 HIS A1040      78.907  33.821  41.954  1.00 21.74           C  
ATOM   1477  CE1 HIS A1040      80.918  33.831  42.822  1.00 24.28           C  
ATOM   1478  NE2 HIS A1040      80.150  33.238  41.928  1.00 24.58           N  
ATOM   1479  N   ALA A1041      75.325  34.119  41.315  1.00 17.72           N  
ATOM   1480  CA  ALA A1041      74.435  32.981  41.202  1.00 18.23           C  
ATOM   1481  C   ALA A1041      75.251  31.697  41.034  1.00 19.41           C  
ATOM   1482  O   ALA A1041      76.481  31.712  40.995  1.00 19.45           O  
ATOM   1483  CB  ALA A1041      73.460  33.191  40.043  1.00 19.73           C  
ATOM   1484  N   SER A1042      74.553  30.579  40.918  1.00 20.65           N  
ATOM   1485  CA  SER A1042      75.154  29.252  40.947  1.00 23.18           C  
ATOM   1486  C   SER A1042      75.645  28.812  39.567  1.00 25.30           C  
ATOM   1487  O   SER A1042      75.188  29.303  38.529  1.00 21.28           O  
ATOM   1488  CB  SER A1042      74.144  28.235  41.478  1.00 21.23           C  
ATOM   1489  OG  SER A1042      74.670  26.927  41.432  1.00 29.74           O  
ATOM   1490  N   ASN A1043      76.606  27.870  39.585  1.00 20.07           N  
ATOM   1491  CA  ASN A1043      77.043  27.130  38.403  1.00 25.48           C  
ATOM   1492  C   ASN A1043      75.947  26.261  37.802  1.00 21.21           C  
ATOM   1493  O   ASN A1043      76.043  25.892  36.627  1.00 24.98           O  
ATOM   1494  CB  ASN A1043      78.219  26.189  38.740  1.00 25.23           C  
ATOM   1495  CG  ASN A1043      79.507  26.922  39.006  1.00 42.43           C  
ATOM   1496  OD1 ASN A1043      79.515  28.062  39.474  1.00 40.37           O  
ATOM   1497  ND2 ASN A1043      80.621  26.262  38.708  1.00 54.16           N  
ATOM   1498  N   ASN A1044      74.946  25.875  38.579  1.00 18.78           N  
ATOM   1499  CA  ASN A1044      73.889  25.039  38.043  1.00 22.48           C  
ATOM   1500  C   ASN A1044      72.526  25.588  38.419  1.00 21.85           C  
ATOM   1501  O   ASN A1044      72.388  26.401  39.339  1.00 21.17           O  
ATOM   1502  CB  ASN A1044      73.999  23.578  38.495  1.00 25.07           C  
ATOM   1503  CG  ASN A1044      74.381  23.440  39.920  1.00 37.50           C  
ATOM   1504  OD1 ASN A1044      73.670  23.888  40.816  1.00 43.39           O  
ATOM   1505  ND2 ASN A1044      75.511  22.778  40.157  1.00 47.42           N  
ATOM   1506  N   ILE A1045      71.529  25.145  37.655  1.00 18.16           N  
ATOM   1507  CA  ILE A1045      70.120  25.438  37.912  1.00 16.92           C  
ATOM   1508  C   ILE A1045      69.435  24.128  38.270  1.00 21.57           C  
ATOM   1509  O   ILE A1045      69.530  23.150  37.518  1.00 20.36           O  
ATOM   1510  CB  ILE A1045      69.438  26.084  36.696  1.00 19.06           C  
ATOM   1511  CG1 ILE A1045      70.295  27.221  36.136  1.00 19.74           C  
ATOM   1512  CG2 ILE A1045      68.056  26.602  37.085  1.00 20.17           C  
ATOM   1513  CD1 ILE A1045      69.805  27.726  34.792  1.00 19.96           C  
ATOM   1514  N   MET A1046      68.763  24.105  39.414  1.00 20.75           N  
ATOM   1515  CA  MET A1046      68.019  22.939  39.870  1.00 18.87           C  
ATOM   1516  C   MET A1046      66.529  23.184  39.659  1.00 18.97           C  
ATOM   1517  O   MET A1046      65.956  24.087  40.276  1.00 17.92           O  
ATOM   1518  CB  MET A1046      68.303  22.651  41.343  1.00 17.14           C  
ATOM   1519  CG  MET A1046      67.580  21.420  41.858  1.00 23.70           C  
ATOM   1520  SD  MET A1046      68.056  19.935  40.947  1.00 31.04           S  
ATOM   1521  CE  MET A1046      69.826  19.879  41.283  1.00 31.27           C  
ATOM   1522  N   PHE A1047      65.910  22.372  38.795  1.00 17.40           N  
ATOM   1523  CA  PHE A1047      64.460  22.359  38.607  1.00 18.44           C  
ATOM   1524  C   PHE A1047      63.926  21.222  39.455  1.00 19.08           C  
ATOM   1525  O   PHE A1047      64.155  20.054  39.136  1.00 19.36           O  
ATOM   1526  CB  PHE A1047      64.070  22.139  37.150  1.00 16.23           C  
ATOM   1527  CG  PHE A1047      64.523  23.222  36.200  1.00 18.59           C  
ATOM   1528  CD1 PHE A1047      65.834  23.274  35.755  1.00 21.58           C  
ATOM   1529  CD2 PHE A1047      63.617  24.133  35.689  1.00 19.88           C  
ATOM   1530  CE1 PHE A1047      66.241  24.248  34.846  1.00 21.02           C  
ATOM   1531  CE2 PHE A1047      64.022  25.114  34.785  1.00 20.41           C  
ATOM   1532  CZ  PHE A1047      65.341  25.163  34.365  1.00 18.17           C  
ATOM   1533  N   LYS A1048      63.206  21.559  40.521  1.00 17.84           N  
ATOM   1534  CA  LYS A1048      62.860  20.569  41.528  1.00 18.59           C  
ATOM   1535  C   LYS A1048      61.960  21.191  42.576  1.00 18.18           C  
ATOM   1536  O   LYS A1048      62.258  22.281  43.069  1.00 18.66           O  
ATOM   1537  CB  LYS A1048      64.137  20.027  42.171  1.00 20.24           C  
ATOM   1538  CG  LYS A1048      63.929  18.957  43.216  1.00 28.44           C  
ATOM   1539  CD  LYS A1048      65.099  18.961  44.195  1.00 34.53           C  
ATOM   1540  CE  LYS A1048      64.916  17.915  45.263  1.00 43.41           C  
ATOM   1541  NZ  LYS A1048      64.988  16.579  44.650  1.00 44.22           N  
ATOM   1542  N   LEU A1049      60.851  20.535  42.910  1.00 18.98           N  
ATOM   1543  CA  LEU A1049      60.044  20.972  44.042  1.00 21.87           C  
ATOM   1544  C   LEU A1049      60.844  20.756  45.319  1.00 26.19           C  
ATOM   1545  O   LEU A1049      61.168  19.619  45.668  1.00 23.45           O  
ATOM   1546  CB  LEU A1049      58.718  20.206  44.104  1.00 19.79           C  
ATOM   1547  CG  LEU A1049      57.551  20.819  43.319  1.00 18.27           C  
ATOM   1548  CD1 LEU A1049      57.776  20.648  41.823  1.00 22.41           C  
ATOM   1549  CD2 LEU A1049      56.206  20.214  43.755  1.00 22.43           C  
ATOM   1550  N   ASP A1050      61.171  21.840  46.008  1.00 21.33           N  
ATOM   1551  CA  ASP A1050      62.074  21.805  47.152  1.00 22.94           C  
ATOM   1552  C   ASP A1050      61.389  22.503  48.316  1.00 24.08           C  
ATOM   1553  O   ASP A1050      61.111  23.706  48.243  1.00 21.28           O  
ATOM   1554  CB  ASP A1050      63.402  22.491  46.803  1.00 29.49           C  
ATOM   1555  CG  ASP A1050      64.473  22.311  47.868  1.00 44.86           C  
ATOM   1556  OD1 ASP A1050      64.146  22.107  49.058  1.00 48.67           O  
ATOM   1557  OD2 ASP A1050      65.663  22.389  47.499  1.00 51.73           O  
ATOM   1558  N   GLY A1051      61.116  21.759  49.378  1.00 22.03           N  
ATOM   1559  CA  GLY A1051      60.456  22.315  50.538  1.00 25.19           C  
ATOM   1560  C   GLY A1051      58.949  22.217  50.515  1.00 22.17           C  
ATOM   1561  O   GLY A1051      58.288  22.893  51.305  1.00 24.76           O  
ATOM   1562  N   CYS A1052      58.383  21.391  49.645  1.00 24.10           N  
ATOM   1563  CA  CYS A1052      56.938  21.273  49.535  1.00 24.37           C  
ATOM   1564  C   CYS A1052      56.467  20.119  50.417  1.00 25.92           C  
ATOM   1565  O   CYS A1052      56.893  18.975  50.227  1.00 25.46           O  
ATOM   1566  CB  CYS A1052      56.518  21.059  48.082  1.00 19.14           C  
ATOM   1567  SG  CYS A1052      54.711  20.910  47.906  1.00 26.71           S  
ATOM   1568  N   ARG A1053      55.591  20.422  51.377  1.00 25.74           N  
ATOM   1569  CA  ARG A1053      55.132  19.430  52.348  1.00 31.99           C  
ATOM   1570  C   ARG A1053      53.965  18.588  51.844  1.00 34.36           C  
ATOM   1571  O   ARG A1053      53.619  17.591  52.490  1.00 37.84           O  
ATOM   1572  CB  ARG A1053      54.727  20.116  53.657  1.00 35.83           C  
ATOM   1573  CG  ARG A1053      55.802  21.010  54.260  1.00 38.44           C  
ATOM   1574  CD  ARG A1053      55.490  21.371  55.711  1.00 54.61           C  
ATOM   1575  NE  ARG A1053      54.283  22.188  55.851  1.00 60.15           N  
ATOM   1576  CZ  ARG A1053      54.282  23.507  56.039  1.00 62.53           C  
ATOM   1577  NH1 ARG A1053      55.430  24.170  56.113  1.00 62.55           N  
ATOM   1578  NH2 ARG A1053      53.133  24.168  56.156  1.00 55.60           N  
ATOM   1579  N   ASP A1054      53.348  18.961  50.722  1.00 30.24           N  
ATOM   1580  CA  ASP A1054      52.223  18.218  50.170  1.00 28.91           C  
ATOM   1581  C   ASP A1054      52.742  17.224  49.139  1.00 27.84           C  
ATOM   1582  O   ASP A1054      53.187  17.645  48.060  1.00 28.48           O  
ATOM   1583  CB  ASP A1054      51.228  19.175  49.535  1.00 30.98           C  
ATOM   1584  CG  ASP A1054      49.965  18.486  49.039  1.00 26.07           C  
ATOM   1585  OD1 ASP A1054      49.962  17.261  48.852  1.00 33.50           O  
ATOM   1586  OD2 ASP A1054      48.976  19.206  48.810  1.00 41.16           O  
ATOM   1587  N   PRO A1055      52.676  15.915  49.397  1.00 26.58           N  
ATOM   1588  CA  PRO A1055      53.273  14.940  48.470  1.00 26.87           C  
ATOM   1589  C   PRO A1055      52.561  14.825  47.135  1.00 30.91           C  
ATOM   1590  O   PRO A1055      53.113  14.207  46.213  1.00 27.13           O  
ATOM   1591  CB  PRO A1055      53.176  13.614  49.242  1.00 34.53           C  
ATOM   1592  CG  PRO A1055      52.926  14.006  50.668  1.00 31.65           C  
ATOM   1593  CD  PRO A1055      52.122  15.269  50.594  1.00 32.46           C  
ATOM   1594  N   HIS A1056      51.358  15.375  46.998  1.00 28.95           N  
ATOM   1595  CA  HIS A1056      50.637  15.277  45.736  1.00 29.38           C  
ATOM   1596  C   HIS A1056      50.928  16.428  44.784  1.00 25.98           C  
ATOM   1597  O   HIS A1056      50.495  16.371  43.627  1.00 25.78           O  
ATOM   1598  CB  HIS A1056      49.125  15.203  45.994  1.00 36.20           C  
ATOM   1599  CG  HIS A1056      48.701  13.926  46.650  1.00 44.43           C  
ATOM   1600  ND1 HIS A1056      47.976  13.890  47.822  1.00 53.47           N  
ATOM   1601  CD2 HIS A1056      48.940  12.636  46.315  1.00 47.19           C  
ATOM   1602  CE1 HIS A1056      47.770  12.632  48.169  1.00 50.96           C  
ATOM   1603  NE2 HIS A1056      48.346  11.851  47.273  1.00 56.28           N  
ATOM   1604  N   ARG A1057      51.624  17.467  45.239  1.00 21.18           N  
ATOM   1605  CA  ARG A1057      51.879  18.610  44.376  1.00 23.84           C  
ATOM   1606  C   ARG A1057      52.835  18.231  43.252  1.00 21.41           C  
ATOM   1607  O   ARG A1057      53.741  17.411  43.422  1.00 22.83           O  
ATOM   1608  CB  ARG A1057      52.452  19.784  45.166  1.00 21.55           C  
ATOM   1609  CG  ARG A1057      51.518  20.400  46.195  1.00 25.82           C  
ATOM   1610  CD  ARG A1057      50.147  20.759  45.608  1.00 26.10           C  
ATOM   1611  NE  ARG A1057      50.232  21.707  44.505  1.00 25.58           N  
ATOM   1612  CZ  ARG A1057      49.179  22.173  43.840  1.00 20.94           C  
ATOM   1613  NH1 ARG A1057      47.957  21.785  44.179  1.00 19.73           N  
ATOM   1614  NH2 ARG A1057      49.351  23.036  42.847  1.00 20.40           N  
ATOM   1615  N   TYR A1058      52.606  18.833  42.085  1.00 16.59           N  
ATOM   1616  CA  TYR A1058      53.478  18.718  40.934  1.00 17.32           C  
ATOM   1617  C   TYR A1058      53.327  19.995  40.122  1.00 18.52           C  
ATOM   1618  O   TYR A1058      52.458  20.829  40.393  1.00 20.54           O  
ATOM   1619  CB  TYR A1058      53.157  17.475  40.077  1.00 19.21           C  
ATOM   1620  CG  TYR A1058      51.748  17.453  39.517  1.00 20.63           C  
ATOM   1621  CD1 TYR A1058      51.440  18.093  38.308  1.00 20.73           C  
ATOM   1622  CD2 TYR A1058      50.726  16.809  40.199  1.00 24.30           C  
ATOM   1623  CE1 TYR A1058      50.133  18.071  37.786  1.00 18.28           C  
ATOM   1624  CE2 TYR A1058      49.428  16.783  39.696  1.00 23.31           C  
ATOM   1625  CZ  TYR A1058      49.135  17.414  38.497  1.00 21.06           C  
ATOM   1626  OH  TYR A1058      47.840  17.385  38.018  1.00 18.79           O  
ATOM   1627  N   ILE A1059      54.186  20.150  39.124  1.00 20.84           N  
ATOM   1628  CA  ILE A1059      54.005  21.188  38.117  1.00 20.49           C  
ATOM   1629  C   ILE A1059      54.342  20.577  36.773  1.00 19.40           C  
ATOM   1630  O   ILE A1059      55.070  19.585  36.681  1.00 19.10           O  
ATOM   1631  CB  ILE A1059      54.886  22.445  38.335  1.00 16.70           C  
ATOM   1632  CG1 ILE A1059      56.371  22.097  38.139  1.00 16.24           C  
ATOM   1633  CG2 ILE A1059      54.617  23.093  39.703  1.00 18.91           C  
ATOM   1634  CD1 ILE A1059      57.319  23.322  38.170  1.00 19.90           C  
ATOM   1635  N   TRP A1060      53.800  21.191  35.730  1.00 17.75           N  
ATOM   1636  CA  TRP A1060      54.264  21.009  34.361  1.00 18.18           C  
ATOM   1637  C   TRP A1060      55.053  22.244  33.950  1.00 18.73           C  
ATOM   1638  O   TRP A1060      54.694  23.364  34.325  1.00 19.06           O  
ATOM   1639  CB  TRP A1060      53.086  20.821  33.397  1.00 17.34           C  
ATOM   1640  CG  TRP A1060      52.410  19.478  33.500  1.00 20.96           C  
ATOM   1641  CD1 TRP A1060      51.293  19.171  34.231  1.00 22.23           C  
ATOM   1642  CD2 TRP A1060      52.803  18.270  32.835  1.00 19.97           C  
ATOM   1643  NE1 TRP A1060      50.977  17.832  34.072  1.00 19.75           N  
ATOM   1644  CE2 TRP A1060      51.887  17.263  33.218  1.00 22.73           C  
ATOM   1645  CE3 TRP A1060      53.842  17.941  31.953  1.00 20.19           C  
ATOM   1646  CZ2 TRP A1060      51.972  15.961  32.740  1.00 23.73           C  
ATOM   1647  CZ3 TRP A1060      53.938  16.641  31.498  1.00 25.19           C  
ATOM   1648  CH2 TRP A1060      52.999  15.664  31.889  1.00 25.38           C  
ATOM   1649  N   ILE A1061      56.107  22.046  33.159  1.00 17.65           N  
ATOM   1650  CA  ILE A1061      56.923  23.157  32.688  1.00 18.01           C  
ATOM   1651  C   ILE A1061      57.431  22.828  31.289  1.00 21.52           C  
ATOM   1652  O   ILE A1061      57.522  21.657  30.896  1.00 21.80           O  
ATOM   1653  CB  ILE A1061      58.060  23.460  33.703  1.00 21.24           C  
ATOM   1654  CG1 ILE A1061      58.871  24.689  33.300  1.00 27.18           C  
ATOM   1655  CG2 ILE A1061      58.977  22.260  33.880  1.00 23.70           C  
ATOM   1656  CD1 ILE A1061      59.803  25.176  34.394  1.00 27.11           C  
ATOM   1657  N   LYS A1062      57.734  23.876  30.517  1.00 17.90           N  
ATOM   1658  CA  LYS A1062      58.335  23.709  29.199  1.00 18.42           C  
ATOM   1659  C   LYS A1062      59.045  24.990  28.769  1.00 20.61           C  
ATOM   1660  O   LYS A1062      58.738  26.095  29.237  1.00 19.00           O  
ATOM   1661  CB  LYS A1062      57.295  23.291  28.145  1.00 19.46           C  
ATOM   1662  CG  LYS A1062      56.212  24.299  27.879  1.00 19.49           C  
ATOM   1663  CD  LYS A1062      55.202  23.786  26.847  1.00 21.60           C  
ATOM   1664  CE  LYS A1062      54.034  24.739  26.747  1.00 21.12           C  
ATOM   1665  NZ  LYS A1062      52.914  24.170  25.963  1.00 29.59           N  
ATOM   1666  N   TYR A1063      60.024  24.804  27.886  1.00 16.69           N  
ATOM   1667  CA  TYR A1063      60.696  25.883  27.148  1.00 20.19           C  
ATOM   1668  C   TYR A1063      61.386  26.894  28.064  1.00 20.51           C  
ATOM   1669  O   TYR A1063      61.278  28.100  27.859  1.00 19.60           O  
ATOM   1670  CB  TYR A1063      59.727  26.630  26.224  1.00 20.80           C  
ATOM   1671  CG  TYR A1063      59.027  25.821  25.147  1.00 21.48           C  
ATOM   1672  CD1 TYR A1063      59.703  24.865  24.393  1.00 24.96           C  
ATOM   1673  CD2 TYR A1063      57.697  26.067  24.855  1.00 23.19           C  
ATOM   1674  CE1 TYR A1063      59.044  24.147  23.393  1.00 27.96           C  
ATOM   1675  CE2 TYR A1063      57.033  25.366  23.876  1.00 31.79           C  
ATOM   1676  CZ  TYR A1063      57.705  24.407  23.146  1.00 29.12           C  
ATOM   1677  OH  TYR A1063      56.996  23.733  22.180  1.00 34.50           O  
ATOM   1678  N   PHE A1064      62.123  26.414  29.059  1.00 18.50           N  
ATOM   1679  CA  PHE A1064      62.876  27.353  29.887  1.00 18.83           C  
ATOM   1680  C   PHE A1064      64.004  28.014  29.091  1.00 18.30           C  
ATOM   1681  O   PHE A1064      64.783  27.339  28.409  1.00 19.16           O  
ATOM   1682  CB  PHE A1064      63.443  26.664  31.121  1.00 18.73           C  
ATOM   1683  CG  PHE A1064      64.128  27.610  32.063  1.00 16.05           C  
ATOM   1684  CD1 PHE A1064      63.416  28.233  33.063  1.00 17.14           C  
ATOM   1685  CD2 PHE A1064      65.489  27.876  31.943  1.00 18.27           C  
ATOM   1686  CE1 PHE A1064      64.039  29.127  33.925  1.00 20.45           C  
ATOM   1687  CE2 PHE A1064      66.117  28.762  32.798  1.00 18.96           C  
ATOM   1688  CZ  PHE A1064      65.396  29.393  33.792  1.00 19.47           C  
ATOM   1689  N   ASN A1065      64.097  29.339  29.198  1.00 17.88           N  
ATOM   1690  CA  ASN A1065      65.092  30.142  28.492  1.00 17.07           C  
ATOM   1691  C   ASN A1065      65.711  31.152  29.444  1.00 17.57           C  
ATOM   1692  O   ASN A1065      65.047  31.650  30.353  1.00 16.94           O  
ATOM   1693  CB  ASN A1065      64.483  30.910  27.311  1.00 21.03           C  
ATOM   1694  CG  ASN A1065      64.409  30.083  26.055  1.00 26.59           C  
ATOM   1695  OD1 ASN A1065      65.278  30.168  25.195  1.00 35.15           O  
ATOM   1696  ND2 ASN A1065      63.394  29.265  25.951  1.00 28.65           N  
ATOM   1697  N   LEU A1066      66.986  31.460  29.213  1.00 17.06           N  
ATOM   1698  CA  LEU A1066      67.679  32.572  29.847  1.00 16.87           C  
ATOM   1699  C   LEU A1066      68.246  33.485  28.773  1.00 19.60           C  
ATOM   1700  O   LEU A1066      68.734  33.020  27.737  1.00 20.89           O  
ATOM   1701  CB  LEU A1066      68.858  32.107  30.749  1.00 19.17           C  
ATOM   1702  CG  LEU A1066      68.583  31.550  32.139  1.00 23.32           C  
ATOM   1703  CD1 LEU A1066      69.862  31.001  32.735  1.00 20.38           C  
ATOM   1704  CD2 LEU A1066      67.988  32.630  33.059  1.00 24.79           C  
ATOM   1705  N   PHE A1067      68.236  34.784  29.059  1.00 18.96           N  
ATOM   1706  CA  PHE A1067      68.710  35.806  28.143  1.00 20.45           C  
ATOM   1707  C   PHE A1067      69.605  36.771  28.908  1.00 20.09           C  
ATOM   1708  O   PHE A1067      69.247  37.210  30.000  1.00 20.97           O  
ATOM   1709  CB  PHE A1067      67.541  36.581  27.517  1.00 20.08           C  
ATOM   1710  CG  PHE A1067      66.460  35.703  26.920  1.00 19.76           C  
ATOM   1711  CD1 PHE A1067      65.425  35.225  27.700  1.00 19.86           C  
ATOM   1712  CD2 PHE A1067      66.471  35.386  25.574  1.00 24.26           C  
ATOM   1713  CE1 PHE A1067      64.415  34.436  27.153  1.00 19.94           C  
ATOM   1714  CE2 PHE A1067      65.472  34.588  25.022  1.00 22.72           C  
ATOM   1715  CZ  PHE A1067      64.447  34.116  25.821  1.00 21.55           C  
ATOM   1716  N   ASP A1068      70.759  37.125  28.354  1.00 23.28           N  
ATOM   1717  CA  ASP A1068      71.572  38.099  29.089  1.00 23.76           C  
ATOM   1718  C   ASP A1068      71.306  39.528  28.609  1.00 23.63           C  
ATOM   1719  O   ASP A1068      72.204  40.294  28.265  1.00 21.39           O  
ATOM   1720  CB  ASP A1068      73.056  37.737  29.046  1.00 29.29           C  
ATOM   1721  CG  ASP A1068      73.691  37.927  27.696  1.00 41.60           C  
ATOM   1722  OD1 ASP A1068      72.966  38.009  26.692  1.00 39.93           O  
ATOM   1723  OD2 ASP A1068      74.945  37.991  27.644  1.00 54.62           O  
ATOM   1724  N   LYS A1069      70.026  39.892  28.602  1.00 20.71           N  
ATOM   1725  CA  LYS A1069      69.594  41.280  28.495  1.00 21.29           C  
ATOM   1726  C   LYS A1069      68.212  41.408  29.135  1.00 18.18           C  
ATOM   1727  O   LYS A1069      67.580  40.411  29.496  1.00 19.18           O  
ATOM   1728  CB  LYS A1069      69.552  41.743  27.039  1.00 23.00           C  
ATOM   1729  CG  LYS A1069      68.390  41.141  26.289  1.00 23.27           C  
ATOM   1730  CD  LYS A1069      68.472  41.371  24.805  1.00 35.17           C  
ATOM   1731  CE  LYS A1069      67.640  42.548  24.381  1.00 36.30           C  
ATOM   1732  NZ  LYS A1069      67.353  42.475  22.922  1.00 36.69           N  
ATOM   1733  N   GLU A1070      67.754  42.655  29.280  1.00 18.36           N  
ATOM   1734  CA  GLU A1070      66.362  42.937  29.632  1.00 20.25           C  
ATOM   1735  C   GLU A1070      65.541  42.922  28.348  1.00 24.14           C  
ATOM   1736  O   GLU A1070      65.685  43.819  27.513  1.00 20.27           O  
ATOM   1737  CB  GLU A1070      66.233  44.290  30.334  1.00 20.24           C  
ATOM   1738  CG  GLU A1070      64.797  44.618  30.749  1.00 20.56           C  
ATOM   1739  CD  GLU A1070      64.573  46.099  31.050  1.00 25.96           C  
ATOM   1740  OE1 GLU A1070      65.189  46.951  30.383  1.00 28.16           O  
ATOM   1741  OE2 GLU A1070      63.776  46.404  31.960  1.00 28.31           O  
ATOM   1742  N   LEU A1071      64.705  41.898  28.164  1.00 17.57           N  
ATOM   1743  CA  LEU A1071      63.828  41.869  27.002  1.00 19.82           C  
ATOM   1744  C   LEU A1071      62.832  43.021  27.069  1.00 21.09           C  
ATOM   1745  O   LEU A1071      62.413  43.445  28.150  1.00 20.75           O  
ATOM   1746  CB  LEU A1071      63.058  40.541  26.926  1.00 18.89           C  
ATOM   1747  CG  LEU A1071      63.884  39.256  26.866  1.00 22.93           C  
ATOM   1748  CD1 LEU A1071      62.941  38.006  26.924  1.00 20.50           C  
ATOM   1749  CD2 LEU A1071      64.740  39.245  25.622  1.00 20.65           C  
ATOM   1750  N   ASN A1072      62.433  43.516  25.902  1.00 20.86           N  
ATOM   1751  CA  ASN A1072      61.440  44.577  25.846  1.00 25.47           C  
ATOM   1752  C   ASN A1072      60.067  44.002  25.491  1.00 26.27           C  
ATOM   1753  O   ASN A1072      59.931  42.834  25.117  1.00 21.78           O  
ATOM   1754  CB  ASN A1072      61.863  45.690  24.866  1.00 28.09           C  
ATOM   1755  CG  ASN A1072      61.888  45.242  23.401  1.00 28.76           C  
ATOM   1756  OD1 ASN A1072      61.043  44.481  22.945  1.00 27.88           O  
ATOM   1757  ND2 ASN A1072      62.856  45.754  22.653  1.00 30.19           N  
ATOM   1758  N   LYS A1073      59.049  44.862  25.604  1.00 26.49           N  
ATOM   1759  CA  LYS A1073      57.662  44.449  25.400  1.00 30.81           C  
ATOM   1760  C   LYS A1073      57.468  43.705  24.088  1.00 25.73           C  
ATOM   1761  O   LYS A1073      56.746  42.706  24.033  1.00 26.38           O  
ATOM   1762  CB  LYS A1073      56.742  45.670  25.423  1.00 32.97           C  
ATOM   1763  CG  LYS A1073      56.429  46.251  26.776  1.00 45.67           C  
ATOM   1764  CD  LYS A1073      54.964  46.693  26.813  1.00 56.11           C  
ATOM   1765  CE  LYS A1073      54.667  47.660  27.956  1.00 53.75           C  
ATOM   1766  NZ  LYS A1073      54.738  47.027  29.293  1.00 46.59           N  
ATOM   1767  N   LYS A1074      58.087  44.187  23.013  1.00 25.82           N  
ATOM   1768  CA  LYS A1074      57.849  43.594  21.702  1.00 25.63           C  
ATOM   1769  C   LYS A1074      58.505  42.231  21.579  1.00 27.30           C  
ATOM   1770  O   LYS A1074      57.905  41.297  21.034  1.00 27.67           O  
ATOM   1771  CB  LYS A1074      58.353  44.531  20.606  1.00 29.47           C  
ATOM   1772  CG  LYS A1074      58.501  43.871  19.260  1.00 34.92           C  
ATOM   1773  CD  LYS A1074      58.648  44.906  18.147  1.00 40.18           C  
ATOM   1774  CE  LYS A1074      59.294  44.284  16.914  1.00 45.66           C  
ATOM   1775  NZ  LYS A1074      58.671  42.975  16.545  1.00 53.14           N  
ATOM   1776  N   GLU A1075      59.748  42.106  22.051  1.00 23.59           N  
ATOM   1777  CA  GLU A1075      60.419  40.813  22.037  1.00 26.25           C  
ATOM   1778  C   GLU A1075      59.630  39.777  22.834  1.00 21.89           C  
ATOM   1779  O   GLU A1075      59.562  38.608  22.450  1.00 22.60           O  
ATOM   1780  CB  GLU A1075      61.836  40.957  22.593  1.00 25.99           C  
ATOM   1781  CG  GLU A1075      62.695  41.942  21.794  1.00 25.87           C  
ATOM   1782  CD  GLU A1075      64.007  42.268  22.466  1.00 29.45           C  
ATOM   1783  OE1 GLU A1075      64.023  42.425  23.704  1.00 26.41           O  
ATOM   1784  OE2 GLU A1075      65.025  42.381  21.754  1.00 33.76           O  
ATOM   1785  N   ILE A1076      59.044  40.189  23.952  1.00 20.63           N  
ATOM   1786  CA  ILE A1076      58.316  39.243  24.793  1.00 23.56           C  
ATOM   1787  C   ILE A1076      57.028  38.802  24.112  1.00 25.55           C  
ATOM   1788  O   ILE A1076      56.677  37.615  24.131  1.00 20.72           O  
ATOM   1789  CB  ILE A1076      58.065  39.859  26.181  1.00 19.19           C  
ATOM   1790  CG1 ILE A1076      59.404  40.015  26.917  1.00 18.59           C  
ATOM   1791  CG2 ILE A1076      57.134  38.982  27.008  1.00 22.63           C  
ATOM   1792  CD1 ILE A1076      59.312  40.862  28.181  1.00 22.41           C  
ATOM   1793  N   LYS A1077      56.312  39.739  23.483  1.00 25.64           N  
ATOM   1794  CA  LYS A1077      55.105  39.366  22.755  1.00 26.19           C  
ATOM   1795  C   LYS A1077      55.440  38.444  21.587  1.00 25.95           C  
ATOM   1796  O   LYS A1077      54.752  37.446  21.357  1.00 26.82           O  
ATOM   1797  CB  LYS A1077      54.372  40.627  22.287  1.00 31.21           C  
ATOM   1798  CG  LYS A1077      53.106  40.369  21.469  1.00 43.13           C  
ATOM   1799  CD  LYS A1077      52.043  39.639  22.284  1.00 46.54           C  
ATOM   1800  CE  LYS A1077      50.779  39.374  21.460  1.00 50.45           C  
ATOM   1801  NZ  LYS A1077      49.817  38.476  22.174  1.00 44.49           N  
ATOM   1802  N   ASP A1078      56.528  38.726  20.871  1.00 27.01           N  
ATOM   1803  CA  ASP A1078      56.923  37.840  19.780  1.00 28.56           C  
ATOM   1804  C   ASP A1078      57.366  36.475  20.294  1.00 29.86           C  
ATOM   1805  O   ASP A1078      57.105  35.454  19.646  1.00 27.88           O  
ATOM   1806  CB  ASP A1078      58.022  38.494  18.942  1.00 34.63           C  
ATOM   1807  CG  ASP A1078      57.518  39.719  18.178  1.00 39.75           C  
ATOM   1808  OD1 ASP A1078      56.283  39.920  18.128  1.00 39.03           O  
ATOM   1809  OD2 ASP A1078      58.345  40.484  17.631  1.00 40.33           O  
ATOM   1810  N   LEU A1079      58.016  36.433  21.459  1.00 26.37           N  
ATOM   1811  CA  LEU A1079      58.382  35.157  22.074  1.00 25.63           C  
ATOM   1812  C   LEU A1079      57.141  34.354  22.438  1.00 21.46           C  
ATOM   1813  O   LEU A1079      57.060  33.147  22.174  1.00 22.79           O  
ATOM   1814  CB  LEU A1079      59.231  35.428  23.315  1.00 23.38           C  
ATOM   1815  CG  LEU A1079      60.154  34.376  23.903  1.00 31.63           C  
ATOM   1816  CD1 LEU A1079      61.089  33.830  22.836  1.00 31.18           C  
ATOM   1817  CD2 LEU A1079      60.966  35.043  24.999  1.00 27.02           C  
ATOM   1818  N   TYR A1080      56.180  35.011  23.085  1.00 22.49           N  
ATOM   1819  CA  TYR A1080      54.911  34.380  23.441  1.00 23.49           C  
ATOM   1820  C   TYR A1080      54.239  33.775  22.216  1.00 26.86           C  
ATOM   1821  O   TYR A1080      53.776  32.627  22.246  1.00 25.33           O  
ATOM   1822  CB  TYR A1080      54.010  35.427  24.092  1.00 21.06           C  
ATOM   1823  CG  TYR A1080      52.631  34.953  24.473  1.00 24.57           C  
ATOM   1824  CD1 TYR A1080      52.441  33.734  25.129  1.00 23.10           C  
ATOM   1825  CD2 TYR A1080      51.516  35.734  24.200  1.00 26.94           C  
ATOM   1826  CE1 TYR A1080      51.167  33.306  25.488  1.00 22.73           C  
ATOM   1827  CE2 TYR A1080      50.246  35.317  24.563  1.00 27.32           C  
ATOM   1828  CZ  TYR A1080      50.079  34.107  25.203  1.00 26.12           C  
ATOM   1829  OH  TYR A1080      48.818  33.700  25.555  1.00 26.25           O  
ATOM   1830  N   ASP A1081      54.195  34.543  21.119  1.00 28.81           N  
ATOM   1831  CA  ASP A1081      53.528  34.101  19.896  1.00 29.00           C  
ATOM   1832  C   ASP A1081      54.274  32.950  19.229  1.00 29.37           C  
ATOM   1833  O   ASP A1081      53.648  31.987  18.768  1.00 36.46           O  
ATOM   1834  CB  ASP A1081      53.380  35.274  18.920  1.00 31.27           C  
ATOM   1835  CG  ASP A1081      52.364  36.315  19.381  1.00 40.70           C  
ATOM   1836  OD1 ASP A1081      51.580  36.037  20.322  1.00 43.21           O  
ATOM   1837  OD2 ASP A1081      52.334  37.418  18.782  1.00 41.34           O  
ATOM   1838  N   ASN A1082      55.609  33.023  19.166  1.00 27.96           N  
ATOM   1839  CA  ASN A1082      56.380  31.989  18.479  1.00 30.63           C  
ATOM   1840  C   ASN A1082      56.401  30.676  19.249  1.00 34.91           C  
ATOM   1841  O   ASN A1082      56.518  29.605  18.640  1.00 38.92           O  
ATOM   1842  CB  ASN A1082      57.812  32.458  18.236  1.00 33.30           C  
ATOM   1843  CG  ASN A1082      57.885  33.577  17.229  1.00 48.53           C  
ATOM   1844  OD1 ASN A1082      56.864  33.995  16.682  1.00 48.93           O  
ATOM   1845  ND2 ASN A1082      59.089  34.081  16.984  1.00 46.46           N  
ATOM   1846  N   GLN A1083      56.322  30.724  20.572  1.00 26.36           N  
ATOM   1847  CA  GLN A1083      56.291  29.490  21.342  1.00 25.36           C  
ATOM   1848  C   GLN A1083      54.875  28.955  21.539  1.00 30.49           C  
ATOM   1849  O   GLN A1083      54.711  27.898  22.156  1.00 32.99           O  
ATOM   1850  CB  GLN A1083      56.977  29.695  22.698  1.00 23.59           C  
ATOM   1851  CG  GLN A1083      58.491  29.872  22.583  1.00 27.57           C  
ATOM   1852  CD  GLN A1083      59.169  30.069  23.926  1.00 27.56           C  
ATOM   1853  OE1 GLN A1083      58.513  30.115  24.965  1.00 22.14           O  
ATOM   1854  NE2 GLN A1083      60.496  30.196  23.907  1.00 24.25           N  
ATOM   1855  N   SER A1084      53.860  29.656  21.025  1.00 34.08           N  
ATOM   1856  CA  SER A1084      52.459  29.293  21.215  1.00 30.52           C  
ATOM   1857  C   SER A1084      51.983  28.175  20.295  1.00 38.05           C  
ATOM   1858  O   SER A1084      50.911  27.616  20.556  1.00 35.82           O  
ATOM   1859  CB  SER A1084      51.555  30.510  20.998  1.00 31.46           C  
ATOM   1860  OG  SER A1084      51.403  31.292  22.175  1.00 34.10           O  
ATOM   1861  N   ASN A1085      52.721  27.854  19.230  1.00 35.74           N  
ATOM   1862  CA  ASN A1085      52.332  26.823  18.257  1.00 34.58           C  
ATOM   1863  C   ASN A1085      50.932  27.095  17.697  1.00 37.91           C  
ATOM   1864  O   ASN A1085      50.011  26.277  17.794  1.00 33.00           O  
ATOM   1865  CB  ASN A1085      52.412  25.424  18.877  1.00 35.57           C  
ATOM   1866  CG  ASN A1085      53.806  25.085  19.386  1.00 48.46           C  
ATOM   1867  OD1 ASN A1085      54.714  25.922  19.363  1.00 51.09           O  
ATOM   1868  ND2 ASN A1085      53.984  23.848  19.840  1.00 44.18           N  
ATOM   1869  N   SER A1086      50.786  28.266  17.083  1.00 31.56           N  
ATOM   1870  CA  SER A1086      49.456  28.760  16.751  1.00 39.47           C  
ATOM   1871  C   SER A1086      48.773  27.985  15.627  1.00 37.25           C  
ATOM   1872  O   SER A1086      47.596  28.243  15.364  1.00 38.55           O  
ATOM   1873  CB  SER A1086      49.526  30.247  16.396  1.00 45.98           C  
ATOM   1874  OG  SER A1086      50.592  30.501  15.498  1.00 58.40           O  
ATOM   1875  N   GLY A1087      49.456  27.043  14.974  1.00 33.18           N  
ATOM   1876  CA  GLY A1087      48.790  26.191  13.994  1.00 33.01           C  
ATOM   1877  C   GLY A1087      48.003  25.027  14.578  1.00 32.49           C  
ATOM   1878  O   GLY A1087      47.270  24.350  13.850  1.00 31.89           O  
ATOM   1879  N   ILE A1088      48.127  24.795  15.880  1.00 27.55           N  
ATOM   1880  CA  ILE A1088      47.503  23.674  16.571  1.00 27.39           C  
ATOM   1881  C   ILE A1088      46.449  24.233  17.519  1.00 25.44           C  
ATOM   1882  O   ILE A1088      46.743  25.132  18.313  1.00 24.43           O  
ATOM   1883  CB  ILE A1088      48.562  22.853  17.330  1.00 29.14           C  
ATOM   1884  CG1 ILE A1088      49.563  22.231  16.340  1.00 27.07           C  
ATOM   1885  CG2 ILE A1088      47.906  21.797  18.204  1.00 23.41           C  
ATOM   1886  CD1 ILE A1088      50.783  21.574  16.999  1.00 32.41           C  
ATOM   1887  N   LEU A1089      45.217  23.729  17.419  1.00 22.81           N  
ATOM   1888  CA  LEU A1089      44.185  24.134  18.365  1.00 21.19           C  
ATOM   1889  C   LEU A1089      44.519  23.601  19.750  1.00 20.99           C  
ATOM   1890  O   LEU A1089      45.152  22.551  19.894  1.00 21.02           O  
ATOM   1891  CB  LEU A1089      42.798  23.618  17.957  1.00 22.59           C  
ATOM   1892  CG  LEU A1089      42.050  24.306  16.820  1.00 23.57           C  
ATOM   1893  CD1 LEU A1089      42.566  23.823  15.487  1.00 26.26           C  
ATOM   1894  CD2 LEU A1089      40.570  24.063  16.937  1.00 25.25           C  
ATOM   1895  N   LYS A1090      44.056  24.322  20.770  1.00 18.80           N  
ATOM   1896  CA  LYS A1090      44.318  23.996  22.167  1.00 20.86           C  
ATOM   1897  C   LYS A1090      43.017  23.721  22.909  1.00 19.40           C  
ATOM   1898  O   LYS A1090      41.982  24.329  22.616  1.00 21.53           O  
ATOM   1899  CB  LYS A1090      45.043  25.150  22.902  1.00 18.34           C  
ATOM   1900  CG  LYS A1090      46.273  25.702  22.196  1.00 26.99           C  
ATOM   1901  CD  LYS A1090      47.277  24.613  21.914  1.00 23.11           C  
ATOM   1902  CE  LYS A1090      48.611  25.222  21.486  1.00 28.91           C  
ATOM   1903  NZ  LYS A1090      48.452  26.227  20.394  1.00 30.88           N  
ATOM   1904  N   ASP A1091      43.093  22.846  23.916  1.00 19.23           N  
ATOM   1905  CA  ASP A1091      41.978  22.696  24.837  1.00 15.91           C  
ATOM   1906  C   ASP A1091      42.034  23.798  25.901  1.00 20.61           C  
ATOM   1907  O   ASP A1091      42.909  24.678  25.883  1.00 18.32           O  
ATOM   1908  CB  ASP A1091      41.948  21.286  25.447  1.00 17.24           C  
ATOM   1909  CG  ASP A1091      43.130  20.974  26.373  1.00 21.93           C  
ATOM   1910  OD1 ASP A1091      43.848  21.889  26.844  1.00 17.26           O  
ATOM   1911  OD2 ASP A1091      43.314  19.766  26.666  1.00 21.67           O  
ATOM   1912  N   PHE A1092      41.084  23.737  26.837  1.00 17.14           N  
ATOM   1913  CA  PHE A1092      40.931  24.780  27.853  1.00 16.14           C  
ATOM   1914  C   PHE A1092      42.194  24.918  28.694  1.00 20.91           C  
ATOM   1915  O   PHE A1092      42.572  26.026  29.090  1.00 17.04           O  
ATOM   1916  CB  PHE A1092      39.723  24.446  28.733  1.00 15.29           C  
ATOM   1917  CG  PHE A1092      39.467  25.405  29.871  1.00 16.55           C  
ATOM   1918  CD1 PHE A1092      38.820  26.618  29.654  1.00 19.89           C  
ATOM   1919  CD2 PHE A1092      39.799  25.056  31.173  1.00 17.66           C  
ATOM   1920  CE1 PHE A1092      38.558  27.492  30.718  1.00 21.48           C  
ATOM   1921  CE2 PHE A1092      39.531  25.900  32.238  1.00 16.72           C  
ATOM   1922  CZ  PHE A1092      38.926  27.131  32.018  1.00 17.41           C  
ATOM   1923  N   TRP A1093      42.855  23.801  28.983  1.00 14.90           N  
ATOM   1924  CA  TRP A1093      44.051  23.840  29.807  1.00 17.08           C  
ATOM   1925  C   TRP A1093      45.268  24.337  29.045  1.00 18.65           C  
ATOM   1926  O   TRP A1093      46.309  24.570  29.669  1.00 19.35           O  
ATOM   1927  CB  TRP A1093      44.338  22.446  30.388  1.00 14.10           C  
ATOM   1928  CG  TRP A1093      43.119  21.797  31.029  1.00 17.63           C  
ATOM   1929  CD1 TRP A1093      42.513  20.646  30.640  1.00 16.40           C  
ATOM   1930  CD2 TRP A1093      42.382  22.275  32.167  1.00 15.15           C  
ATOM   1931  NE1 TRP A1093      41.427  20.379  31.453  1.00 19.16           N  
ATOM   1932  CE2 TRP A1093      41.339  21.359  32.406  1.00 20.72           C  
ATOM   1933  CE3 TRP A1093      42.508  23.382  33.007  1.00 14.00           C  
ATOM   1934  CZ2 TRP A1093      40.431  21.522  33.447  1.00 14.12           C  
ATOM   1935  CZ3 TRP A1093      41.611  23.540  34.042  1.00 15.54           C  
ATOM   1936  CH2 TRP A1093      40.585  22.616  34.253  1.00 17.57           C  
ATOM   1937  N   GLY A1094      45.162  24.517  27.726  1.00 17.61           N  
ATOM   1938  CA  GLY A1094      46.288  24.926  26.902  1.00 18.57           C  
ATOM   1939  C   GLY A1094      47.070  23.793  26.269  1.00 20.72           C  
ATOM   1940  O   GLY A1094      48.027  24.060  25.530  1.00 18.27           O  
ATOM   1941  N   ASP A1095      46.701  22.540  26.534  1.00 19.11           N  
ATOM   1942  CA  ASP A1095      47.310  21.418  25.831  1.00 20.88           C  
ATOM   1943  C   ASP A1095      46.770  21.350  24.406  1.00 20.86           C  
ATOM   1944  O   ASP A1095      45.797  22.020  24.056  1.00 19.23           O  
ATOM   1945  CB  ASP A1095      47.021  20.099  26.542  1.00 18.93           C  
ATOM   1946  CG  ASP A1095      47.773  19.947  27.850  1.00 23.53           C  
ATOM   1947  OD1 ASP A1095      48.935  20.389  27.947  1.00 22.11           O  
ATOM   1948  OD2 ASP A1095      47.180  19.387  28.790  1.00 23.93           O  
ATOM   1949  N   TYR A1096      47.417  20.526  23.579  1.00 19.40           N  
ATOM   1950  CA  TYR A1096      46.956  20.298  22.212  1.00 21.02           C  
ATOM   1951  C   TYR A1096      45.565  19.680  22.217  1.00 18.45           C  
ATOM   1952  O   TYR A1096      45.313  18.710  22.936  1.00 19.93           O  
ATOM   1953  CB  TYR A1096      47.910  19.357  21.461  1.00 24.49           C  
ATOM   1954  CG  TYR A1096      49.306  19.893  21.181  1.00 23.50           C  
ATOM   1955  CD1 TYR A1096      49.593  21.239  21.286  1.00 24.74           C  
ATOM   1956  CD2 TYR A1096      50.326  19.039  20.808  1.00 29.65           C  
ATOM   1957  CE1 TYR A1096      50.866  21.729  21.022  1.00 30.17           C  
ATOM   1958  CE2 TYR A1096      51.610  19.517  20.547  1.00 32.06           C  
ATOM   1959  CZ  TYR A1096      51.869  20.860  20.656  1.00 32.20           C  
ATOM   1960  OH  TYR A1096      53.128  21.354  20.402  1.00 38.47           O  
ATOM   1961  N   LEU A1097      44.675  20.232  21.399  1.00 19.78           N  
ATOM   1962  CA  LEU A1097      43.388  19.595  21.140  1.00 19.99           C  
ATOM   1963  C   LEU A1097      43.597  18.301  20.365  1.00 19.88           C  
ATOM   1964  O   LEU A1097      44.437  18.236  19.462  1.00 21.79           O  
ATOM   1965  CB  LEU A1097      42.491  20.535  20.344  1.00 16.79           C  
ATOM   1966  CG  LEU A1097      40.984  20.279  20.391  1.00 20.48           C  
ATOM   1967  CD1 LEU A1097      40.447  20.559  21.769  1.00 17.49           C  
ATOM   1968  CD2 LEU A1097      40.297  21.142  19.357  1.00 17.59           C  
ATOM   1969  N   GLN A1098      42.827  17.267  20.714  1.00 19.50           N  
ATOM   1970  CA  GLN A1098      43.036  15.930  20.171  1.00 22.43           C  
ATOM   1971  C   GLN A1098      41.746  15.368  19.587  1.00 20.64           C  
ATOM   1972  O   GLN A1098      40.639  15.750  19.980  1.00 22.15           O  
ATOM   1973  CB  GLN A1098      43.546  14.937  21.228  1.00 18.21           C  
ATOM   1974  CG  GLN A1098      44.973  15.140  21.688  1.00 20.00           C  
ATOM   1975  CD  GLN A1098      45.443  14.028  22.599  1.00 31.06           C  
ATOM   1976  OE1 GLN A1098      45.275  12.846  22.289  1.00 30.89           O  
ATOM   1977  NE2 GLN A1098      46.027  14.395  23.732  1.00 26.38           N  
ATOM   1978  N   TYR A1099      41.918  14.442  18.644  1.00 22.86           N  
ATOM   1979  CA  TYR A1099      40.851  13.575  18.163  1.00 26.53           C  
ATOM   1980  C   TYR A1099      40.552  12.488  19.185  1.00 25.55           C  
ATOM   1981  O   TYR A1099      41.403  12.116  19.995  1.00 24.09           O  
ATOM   1982  CB  TYR A1099      41.234  12.919  16.832  1.00 25.94           C  
ATOM   1983  CG  TYR A1099      41.301  13.889  15.680  1.00 23.90           C  
ATOM   1984  CD1 TYR A1099      40.143  14.331  15.060  1.00 23.17           C  
ATOM   1985  CD2 TYR A1099      42.519  14.369  15.220  1.00 25.00           C  
ATOM   1986  CE1 TYR A1099      40.191  15.210  14.009  1.00 27.05           C  
ATOM   1987  CE2 TYR A1099      42.582  15.256  14.169  1.00 23.32           C  
ATOM   1988  CZ  TYR A1099      41.410  15.677  13.564  1.00 27.28           C  
ATOM   1989  OH  TYR A1099      41.445  16.564  12.511  1.00 27.59           O  
ATOM   1990  N   ASP A1100      39.322  11.969  19.125  1.00 26.16           N  
ATOM   1991  CA  ASP A1100      38.903  10.809  19.912  1.00 20.96           C  
ATOM   1992  C   ASP A1100      39.088  11.035  21.409  1.00 28.22           C  
ATOM   1993  O   ASP A1100      39.467  10.123  22.146  1.00 28.30           O  
ATOM   1994  CB  ASP A1100      39.648   9.542  19.467  1.00 27.85           C  
ATOM   1995  CG  ASP A1100      39.467   9.245  17.995  1.00 30.08           C  
ATOM   1996  OD1 ASP A1100      38.401   9.585  17.439  1.00 32.06           O  
ATOM   1997  OD2 ASP A1100      40.388   8.653  17.396  1.00 36.90           O  
ATOM   1998  N   LYS A1101      38.828  12.259  21.867  1.00 24.62           N  
ATOM   1999  CA  LYS A1101      38.977  12.614  23.273  1.00 24.57           C  
ATOM   2000  C   LYS A1101      37.725  13.377  23.687  1.00 22.21           C  
ATOM   2001  O   LYS A1101      37.368  14.369  23.027  1.00 23.26           O  
ATOM   2002  CB  LYS A1101      40.255  13.457  23.480  1.00 22.06           C  
ATOM   2003  CG  LYS A1101      40.567  13.900  24.910  1.00 22.11           C  
ATOM   2004  CD  LYS A1101      42.020  14.378  25.003  1.00 24.36           C  
ATOM   2005  CE  LYS A1101      42.320  15.040  26.334  1.00 23.88           C  
ATOM   2006  NZ  LYS A1101      42.636  14.054  27.391  1.00 33.88           N  
ATOM   2007  N   PRO A1102      37.010  12.940  24.730  1.00 24.11           N  
ATOM   2008  CA  PRO A1102      35.761  13.619  25.096  1.00 21.80           C  
ATOM   2009  C   PRO A1102      36.050  14.961  25.744  1.00 22.78           C  
ATOM   2010  O   PRO A1102      36.962  15.087  26.566  1.00 22.53           O  
ATOM   2011  CB  PRO A1102      35.096  12.659  26.099  1.00 24.94           C  
ATOM   2012  CG  PRO A1102      35.877  11.400  26.047  1.00 26.34           C  
ATOM   2013  CD  PRO A1102      37.262  11.778  25.592  1.00 29.06           C  
ATOM   2014  N   TYR A1103      35.248  15.959  25.383  1.00 19.43           N  
ATOM   2015  CA  TYR A1103      35.397  17.311  25.906  1.00 19.63           C  
ATOM   2016  C   TYR A1103      34.059  17.812  26.413  1.00 19.50           C  
ATOM   2017  O   TYR A1103      33.045  17.655  25.729  1.00 21.60           O  
ATOM   2018  CB  TYR A1103      35.921  18.266  24.832  1.00 14.22           C  
ATOM   2019  CG  TYR A1103      37.342  18.000  24.393  1.00 20.05           C  
ATOM   2020  CD1 TYR A1103      38.408  18.196  25.265  1.00 17.61           C  
ATOM   2021  CD2 TYR A1103      37.632  17.585  23.089  1.00 17.43           C  
ATOM   2022  CE1 TYR A1103      39.732  17.972  24.854  1.00 18.08           C  
ATOM   2023  CE2 TYR A1103      38.952  17.360  22.674  1.00 17.07           C  
ATOM   2024  CZ  TYR A1103      39.993  17.554  23.563  1.00 18.07           C  
ATOM   2025  OH  TYR A1103      41.300  17.346  23.173  1.00 18.48           O  
ATOM   2026  N   TYR A1104      34.057  18.413  27.604  1.00 16.61           N  
ATOM   2027  CA  TYR A1104      32.960  19.278  28.024  1.00 17.78           C  
ATOM   2028  C   TYR A1104      33.089  20.618  27.301  1.00 20.99           C  
ATOM   2029  O   TYR A1104      34.186  21.030  26.929  1.00 18.33           O  
ATOM   2030  CB  TYR A1104      32.987  19.502  29.539  1.00 16.73           C  
ATOM   2031  CG  TYR A1104      32.796  18.234  30.334  1.00 17.30           C  
ATOM   2032  CD1 TYR A1104      31.535  17.696  30.511  1.00 16.40           C  
ATOM   2033  CD2 TYR A1104      33.874  17.582  30.904  1.00 18.39           C  
ATOM   2034  CE1 TYR A1104      31.343  16.539  31.231  1.00 18.81           C  
ATOM   2035  CE2 TYR A1104      33.705  16.408  31.618  1.00 19.59           C  
ATOM   2036  CZ  TYR A1104      32.427  15.901  31.785  1.00 21.31           C  
ATOM   2037  OH  TYR A1104      32.239  14.747  32.495  1.00 24.42           O  
ATOM   2038  N   MET A1105      31.968  21.296  27.090  1.00 19.10           N  
ATOM   2039  CA  MET A1105      31.949  22.489  26.249  1.00 19.90           C  
ATOM   2040  C   MET A1105      31.626  23.718  27.086  1.00 17.99           C  
ATOM   2041  O   MET A1105      30.617  23.750  27.794  1.00 25.23           O  
ATOM   2042  CB  MET A1105      30.939  22.332  25.106  1.00 20.01           C  
ATOM   2043  CG  MET A1105      31.218  21.115  24.193  1.00 19.44           C  
ATOM   2044  SD  MET A1105      32.860  21.180  23.453  1.00 23.72           S  
ATOM   2045  CE  MET A1105      32.786  22.729  22.541  1.00 20.44           C  
ATOM   2046  N   LEU A1106      32.474  24.731  26.996  1.00 16.27           N  
ATOM   2047  CA  LEU A1106      32.240  26.011  27.648  1.00 15.38           C  
ATOM   2048  C   LEU A1106      32.007  27.048  26.564  1.00 17.66           C  
ATOM   2049  O   LEU A1106      32.857  27.234  25.688  1.00 18.55           O  
ATOM   2050  CB  LEU A1106      33.423  26.407  28.531  1.00 18.89           C  
ATOM   2051  CG  LEU A1106      33.411  27.828  29.104  1.00 17.87           C  
ATOM   2052  CD1 LEU A1106      32.260  28.000  30.079  1.00 18.08           C  
ATOM   2053  CD2 LEU A1106      34.752  28.115  29.775  1.00 18.82           C  
ATOM   2054  N   ASN A1107      30.857  27.697  26.603  1.00 17.52           N  
ATOM   2055  CA  ASN A1107      30.571  28.780  25.676  1.00 19.10           C  
ATOM   2056  C   ASN A1107      30.962  30.104  26.327  1.00 19.58           C  
ATOM   2057  O   ASN A1107      30.449  30.460  27.394  1.00 21.49           O  
ATOM   2058  CB  ASN A1107      29.099  28.785  25.273  1.00 18.48           C  
ATOM   2059  CG  ASN A1107      28.812  29.817  24.219  1.00 22.44           C  
ATOM   2060  OD1 ASN A1107      28.717  31.006  24.518  1.00 21.46           O  
ATOM   2061  ND2 ASN A1107      28.724  29.380  22.972  1.00 21.90           N  
ATOM   2062  N   LEU A1108      31.880  30.821  25.696  1.00 19.26           N  
ATOM   2063  CA  LEU A1108      32.431  32.017  26.322  1.00 21.21           C  
ATOM   2064  C   LEU A1108      31.458  33.191  26.311  1.00 21.02           C  
ATOM   2065  O   LEU A1108      31.623  34.118  27.107  1.00 21.81           O  
ATOM   2066  CB  LEU A1108      33.742  32.398  25.640  1.00 20.92           C  
ATOM   2067  CG  LEU A1108      34.834  31.360  25.930  1.00 25.65           C  
ATOM   2068  CD1 LEU A1108      36.135  31.694  25.200  1.00 24.76           C  
ATOM   2069  CD2 LEU A1108      35.062  31.217  27.439  1.00 24.18           C  
ATOM   2070  N   TYR A1109      30.432  33.158  25.468  1.00 20.35           N  
ATOM   2071  CA  TYR A1109      29.463  34.252  25.465  1.00 21.07           C  
ATOM   2072  C   TYR A1109      28.486  34.163  26.641  1.00 21.96           C  
ATOM   2073  O   TYR A1109      28.076  35.197  27.176  1.00 22.88           O  
ATOM   2074  CB  TYR A1109      28.710  34.277  24.137  1.00 20.49           C  
ATOM   2075  CG  TYR A1109      27.903  35.531  23.891  1.00 18.26           C  
ATOM   2076  CD1 TYR A1109      28.493  36.678  23.360  1.00 23.72           C  
ATOM   2077  CD2 TYR A1109      26.551  35.571  24.181  1.00 29.55           C  
ATOM   2078  CE1 TYR A1109      27.737  37.835  23.119  1.00 24.67           C  
ATOM   2079  CE2 TYR A1109      25.798  36.706  23.946  1.00 28.42           C  
ATOM   2080  CZ  TYR A1109      26.386  37.829  23.412  1.00 25.80           C  
ATOM   2081  OH  TYR A1109      25.602  38.945  23.190  1.00 29.14           O  
ATOM   2082  N   ASP A1110      28.071  32.961  27.053  1.00 24.51           N  
ATOM   2083  CA  ASP A1110      27.445  32.795  28.368  1.00 25.26           C  
ATOM   2084  C   ASP A1110      28.103  31.647  29.109  1.00 24.71           C  
ATOM   2085  O   ASP A1110      27.695  30.480  28.992  1.00 21.16           O  
ATOM   2086  CB  ASP A1110      25.941  32.582  28.314  1.00 32.20           C  
ATOM   2087  CG  ASP A1110      25.260  32.972  29.642  1.00 34.93           C  
ATOM   2088  OD1 ASP A1110      25.895  32.911  30.760  1.00 28.18           O  
ATOM   2089  OD2 ASP A1110      24.092  33.375  29.553  1.00 46.11           O  
ATOM   2090  N   PRO A1111      29.106  31.956  29.922  1.00 19.98           N  
ATOM   2091  CA  PRO A1111      29.859  30.901  30.598  1.00 18.01           C  
ATOM   2092  C   PRO A1111      29.115  30.279  31.774  1.00 22.29           C  
ATOM   2093  O   PRO A1111      29.558  29.238  32.276  1.00 20.89           O  
ATOM   2094  CB  PRO A1111      31.140  31.623  31.047  1.00 19.28           C  
ATOM   2095  CG  PRO A1111      30.746  33.073  31.147  1.00 25.34           C  
ATOM   2096  CD  PRO A1111      29.680  33.298  30.111  1.00 24.00           C  
ATOM   2097  N   ASN A1112      28.002  30.858  32.224  1.00 19.04           N  
ATOM   2098  CA  ASN A1112      27.249  30.279  33.328  1.00 23.07           C  
ATOM   2099  C   ASN A1112      26.179  29.307  32.851  1.00 21.93           C  
ATOM   2100  O   ASN A1112      25.257  28.996  33.605  1.00 25.86           O  
ATOM   2101  CB  ASN A1112      26.619  31.381  34.188  1.00 25.70           C  
ATOM   2102  CG  ASN A1112      26.303  30.913  35.608  1.00 27.72           C  
ATOM   2103  OD1 ASN A1112      27.026  30.106  36.186  1.00 28.18           O  
ATOM   2104  ND2 ASN A1112      25.214  31.420  36.168  1.00 29.03           N  
ATOM   2105  N   LYS A1113      26.289  28.823  31.619  1.00 21.54           N  
ATOM   2106  CA  LYS A1113      25.380  27.846  31.044  1.00 22.10           C  
ATOM   2107  C   LYS A1113      26.164  26.623  30.590  1.00 23.27           C  
ATOM   2108  O   LYS A1113      27.388  26.663  30.424  1.00 21.62           O  
ATOM   2109  CB  LYS A1113      24.607  28.443  29.868  1.00 25.82           C  
ATOM   2110  CG  LYS A1113      23.560  29.470  30.287  1.00 24.24           C  
ATOM   2111  CD  LYS A1113      22.722  29.877  29.102  1.00 37.68           C  
ATOM   2112  CE  LYS A1113      21.486  30.628  29.554  1.00 43.22           C  
ATOM   2113  NZ  LYS A1113      21.836  31.626  30.581  1.00 39.99           N  
ATOM   2114  N   TYR A1114      25.446  25.525  30.384  1.00 19.20           N  
ATOM   2115  CA  TYR A1114      26.066  24.303  29.904  1.00 18.81           C  
ATOM   2116  C   TYR A1114      25.132  23.618  28.920  1.00 22.20           C  
ATOM   2117  O   TYR A1114      23.934  23.898  28.870  1.00 25.51           O  
ATOM   2118  CB  TYR A1114      26.423  23.350  31.048  1.00 18.94           C  
ATOM   2119  CG  TYR A1114      25.242  22.899  31.870  1.00 24.52           C  
ATOM   2120  CD1 TYR A1114      24.808  23.636  32.962  1.00 24.00           C  
ATOM   2121  CD2 TYR A1114      24.556  21.732  31.548  1.00 20.56           C  
ATOM   2122  CE1 TYR A1114      23.729  23.224  33.716  1.00 25.91           C  
ATOM   2123  CE2 TYR A1114      23.478  21.309  32.299  1.00 27.18           C  
ATOM   2124  CZ  TYR A1114      23.069  22.054  33.379  1.00 25.97           C  
ATOM   2125  OH  TYR A1114      21.990  21.634  34.116  1.00 29.89           O  
ATOM   2126  N   LEU A1115      25.708  22.698  28.158  1.00 23.97           N  
ATOM   2127  CA  LEU A1115      25.043  22.080  27.023  1.00 23.67           C  
ATOM   2128  C   LEU A1115      24.200  20.887  27.457  1.00 27.28           C  
ATOM   2129  O   LEU A1115      24.606  20.098  28.318  1.00 23.48           O  
ATOM   2130  CB  LEU A1115      26.098  21.636  26.017  1.00 26.98           C  
ATOM   2131  CG  LEU A1115      25.848  21.611  24.518  1.00 37.79           C  
ATOM   2132  CD1 LEU A1115      25.307  22.950  24.032  1.00 33.39           C  
ATOM   2133  CD2 LEU A1115      27.154  21.257  23.834  1.00 32.17           C  
ATOM   2134  N   ASP A1116      23.024  20.754  26.845  1.00 22.13           N  
ATOM   2135  CA  ASP A1116      22.154  19.610  27.065  1.00 25.58           C  
ATOM   2136  C   ASP A1116      21.481  19.274  25.740  1.00 28.32           C  
ATOM   2137  O   ASP A1116      21.417  20.100  24.828  1.00 25.90           O  
ATOM   2138  CB  ASP A1116      21.117  19.892  28.172  1.00 24.69           C  
ATOM   2139  CG  ASP A1116      20.404  18.626  28.666  1.00 33.74           C  
ATOM   2140  OD1 ASP A1116      20.937  17.510  28.487  1.00 33.29           O  
ATOM   2141  OD2 ASP A1116      19.296  18.753  29.235  1.00 36.93           O  
ATOM   2142  N   VAL A1117      21.024  18.034  25.621  1.00 28.42           N  
ATOM   2143  CA  VAL A1117      20.290  17.567  24.451  1.00 27.18           C  
ATOM   2144  C   VAL A1117      18.843  17.370  24.873  1.00 32.14           C  
ATOM   2145  O   VAL A1117      18.569  16.698  25.874  1.00 31.44           O  
ATOM   2146  CB  VAL A1117      20.877  16.261  23.885  1.00 30.68           C  
ATOM   2147  CG1 VAL A1117      20.162  15.863  22.604  1.00 33.91           C  
ATOM   2148  CG2 VAL A1117      22.367  16.395  23.639  1.00 36.65           C  
ATOM   2149  N   ASN A1118      17.920  17.968  24.125  1.00 32.37           N  
ATOM   2150  CA  ASN A1118      16.509  17.759  24.414  1.00 36.50           C  
ATOM   2151  C   ASN A1118      16.093  16.341  24.044  1.00 37.42           C  
ATOM   2152  O   ASN A1118      15.612  15.578  24.892  1.00 43.28           O  
ATOM   2153  CB  ASN A1118      15.671  18.796  23.672  1.00 37.65           C  
ATOM   2154  CG  ASN A1118      14.198  18.646  23.940  1.00 42.22           C  
ATOM   2155  OD1 ASN A1118      13.761  18.689  25.089  1.00 45.88           O  
ATOM   2156  ND2 ASN A1118      13.417  18.478  22.876  1.00 40.07           N  
ATOM   2157  N   ASN A1119      16.286  15.969  22.781  1.00 31.59           N  
ATOM   2158  CA  ASN A1119      16.076  14.614  22.300  1.00 34.78           C  
ATOM   2159  C   ASN A1119      17.092  14.351  21.202  1.00 31.89           C  
ATOM   2160  O   ASN A1119      17.537  15.281  20.530  1.00 36.86           O  
ATOM   2161  CB  ASN A1119      14.657  14.411  21.744  1.00 40.55           C  
ATOM   2162  CG  ASN A1119      13.599  14.327  22.831  1.00 45.85           C  
ATOM   2163  OD1 ASN A1119      13.688  13.501  23.739  1.00 46.45           O  
ATOM   2164  ND2 ASN A1119      12.584  15.181  22.735  1.00 43.43           N  
ATOM   2165  N   VAL A1120      17.457  13.084  21.020  1.00 31.51           N  
ATOM   2166  CA  VAL A1120      18.266  12.711  19.866  1.00 32.48           C  
ATOM   2167  C   VAL A1120      17.376  12.584  18.630  1.00 39.15           C  
ATOM   2168  O   VAL A1120      16.157  12.417  18.717  1.00 36.45           O  
ATOM   2169  CB  VAL A1120      19.053  11.414  20.123  1.00 38.03           C  
ATOM   2170  CG1 VAL A1120      20.045  11.607  21.262  1.00 34.82           C  
ATOM   2171  CG2 VAL A1120      18.106  10.262  20.422  1.00 40.32           C  
ATOM   2172  N   GLY A1121      17.998  12.679  17.463  1.00 36.26           N  
ATOM   2173  CA  GLY A1121      17.282  12.635  16.207  1.00 36.23           C  
ATOM   2174  C   GLY A1121      17.124  14.013  15.582  1.00 35.26           C  
ATOM   2175  O   GLY A1121      17.238  15.050  16.238  1.00 33.97           O  
ATOM   2176  N   ILE A1122      16.822  14.013  14.282  1.00 33.96           N  
ATOM   2177  CA  ILE A1122      16.768  15.251  13.514  1.00 32.50           C  
ATOM   2178  C   ILE A1122      15.634  16.164  13.963  1.00 37.61           C  
ATOM   2179  O   ILE A1122      15.642  17.361  13.646  1.00 38.69           O  
ATOM   2180  CB  ILE A1122      16.650  14.925  12.014  1.00 38.11           C  
ATOM   2181  CG1 ILE A1122      16.901  16.174  11.173  1.00 41.02           C  
ATOM   2182  CG2 ILE A1122      15.286  14.323  11.707  1.00 42.13           C  
ATOM   2183  CD1 ILE A1122      18.289  16.773  11.385  1.00 40.13           C  
ATOM   2184  N   ARG A1123      14.660  15.640  14.701  1.00 36.26           N  
ATOM   2185  CA  ARG A1123      13.610  16.470  15.273  1.00 39.20           C  
ATOM   2186  C   ARG A1123      13.986  17.053  16.625  1.00 36.08           C  
ATOM   2187  O   ARG A1123      13.267  17.921  17.128  1.00 37.45           O  
ATOM   2188  CB  ARG A1123      12.316  15.664  15.423  1.00 47.03           C  
ATOM   2189  CG  ARG A1123      11.780  15.130  14.115  1.00 55.42           C  
ATOM   2190  CD  ARG A1123      11.323  16.273  13.214  1.00 63.26           C  
ATOM   2191  NE  ARG A1123      11.974  16.228  11.915  1.00 74.61           N  
ATOM   2192  CZ  ARG A1123      11.475  15.616  10.847  1.00 77.92           C  
ATOM   2193  NH1 ARG A1123      10.308  14.993  10.928  1.00 79.83           N  
ATOM   2194  NH2 ARG A1123      12.141  15.623   9.699  1.00 82.92           N  
ATOM   2195  N   GLY A1124      15.083  16.590  17.230  1.00 33.88           N  
ATOM   2196  CA  GLY A1124      15.538  17.123  18.493  1.00 36.53           C  
ATOM   2197  C   GLY A1124      16.495  18.287  18.306  1.00 33.08           C  
ATOM   2198  O   GLY A1124      16.823  18.700  17.194  1.00 30.92           O  
ATOM   2199  N   TYR A1125      16.952  18.821  19.434  1.00 33.08           N  
ATOM   2200  CA  TYR A1125      17.874  19.945  19.402  1.00 31.30           C  
ATOM   2201  C   TYR A1125      18.768  19.890  20.630  1.00 29.18           C  
ATOM   2202  O   TYR A1125      18.475  19.209  21.616  1.00 28.15           O  
ATOM   2203  CB  TYR A1125      17.135  21.288  19.334  1.00 29.71           C  
ATOM   2204  CG  TYR A1125      16.172  21.507  20.473  1.00 31.85           C  
ATOM   2205  CD1 TYR A1125      16.609  22.028  21.679  1.00 27.64           C  
ATOM   2206  CD2 TYR A1125      14.820  21.193  20.344  1.00 36.33           C  
ATOM   2207  CE1 TYR A1125      15.738  22.226  22.732  1.00 31.51           C  
ATOM   2208  CE2 TYR A1125      13.938  21.391  21.394  1.00 36.31           C  
ATOM   2209  CZ  TYR A1125      14.405  21.908  22.586  1.00 37.10           C  
ATOM   2210  OH  TYR A1125      13.548  22.113  23.641  1.00 34.23           O  
ATOM   2211  N   MET A1126      19.876  20.604  20.541  1.00 30.62           N  
ATOM   2212  CA  MET A1126      20.760  20.824  21.671  1.00 29.17           C  
ATOM   2213  C   MET A1126      20.624  22.265  22.120  1.00 26.05           C  
ATOM   2214  O   MET A1126      20.352  23.154  21.309  1.00 30.00           O  
ATOM   2215  CB  MET A1126      22.197  20.529  21.291  1.00 29.92           C  
ATOM   2216  CG  MET A1126      22.283  19.297  20.485  1.00 39.12           C  
ATOM   2217  SD  MET A1126      23.696  18.392  21.009  1.00 49.20           S  
ATOM   2218  CE  MET A1126      24.919  19.001  19.898  1.00 44.37           C  
ATOM   2219  N   TYR A1127      20.808  22.494  23.414  1.00 25.68           N  
ATOM   2220  CA  TYR A1127      20.523  23.809  23.952  1.00 24.51           C  
ATOM   2221  C   TYR A1127      21.416  24.072  25.152  1.00 27.17           C  
ATOM   2222  O   TYR A1127      22.032  23.159  25.708  1.00 27.69           O  
ATOM   2223  CB  TYR A1127      19.038  23.955  24.319  1.00 25.85           C  
ATOM   2224  CG  TYR A1127      18.568  23.107  25.478  1.00 23.91           C  
ATOM   2225  CD1 TYR A1127      18.406  21.735  25.346  1.00 27.42           C  
ATOM   2226  CD2 TYR A1127      18.252  23.690  26.699  1.00 25.61           C  
ATOM   2227  CE1 TYR A1127      17.968  20.963  26.409  1.00 29.23           C  
ATOM   2228  CE2 TYR A1127      17.820  22.932  27.760  1.00 26.07           C  
ATOM   2229  CZ  TYR A1127      17.671  21.575  27.609  1.00 27.44           C  
ATOM   2230  OH  TYR A1127      17.241  20.828  28.668  1.00 32.40           O  
ATOM   2231  N   LEU A1128      21.479  25.342  25.538  1.00 27.50           N  
ATOM   2232  CA  LEU A1128      22.266  25.792  26.676  1.00 29.72           C  
ATOM   2233  C   LEU A1128      21.324  26.074  27.837  1.00 25.53           C  
ATOM   2234  O   LEU A1128      20.387  26.863  27.702  1.00 30.20           O  
ATOM   2235  CB  LEU A1128      23.071  27.046  26.319  1.00 26.04           C  
ATOM   2236  CG  LEU A1128      24.282  26.907  25.392  1.00 28.29           C  
ATOM   2237  CD1 LEU A1128      24.797  28.281  24.968  1.00 31.31           C  
ATOM   2238  CD2 LEU A1128      25.399  26.114  26.047  1.00 25.62           C  
ATOM   2239  N   LYS A1129      21.561  25.429  28.970  1.00 26.22           N  
ATOM   2240  CA  LYS A1129      20.766  25.671  30.165  1.00 28.88           C  
ATOM   2241  C   LYS A1129      21.676  26.066  31.323  1.00 25.77           C  
ATOM   2242  O   LYS A1129      22.889  25.880  31.276  1.00 22.66           O  
ATOM   2243  CB  LYS A1129      19.938  24.439  30.535  1.00 33.85           C  
ATOM   2244  CG  LYS A1129      20.731  23.172  30.630  1.00 30.56           C  
ATOM   2245  CD  LYS A1129      19.834  21.991  30.989  1.00 34.86           C  
ATOM   2246  CE  LYS A1129      19.186  22.204  32.343  1.00 38.46           C  
ATOM   2247  NZ  LYS A1129      18.460  21.011  32.827  1.00 53.52           N  
ATOM   2248  N   GLY A1130      21.074  26.614  32.372  1.00 28.31           N  
ATOM   2249  CA  GLY A1130      21.837  27.087  33.511  1.00 29.20           C  
ATOM   2250  C   GLY A1130      21.040  27.116  34.796  1.00 29.78           C  
ATOM   2251  O   GLY A1130      19.830  26.879  34.785  1.00 31.39           O  
ATOM   2252  N   PRO A1131      21.705  27.436  35.913  1.00 26.69           N  
ATOM   2253  CA  PRO A1131      23.108  27.844  35.955  1.00 24.99           C  
ATOM   2254  C   PRO A1131      24.088  26.670  36.035  1.00 24.81           C  
ATOM   2255  O   PRO A1131      23.714  25.562  36.410  1.00 23.18           O  
ATOM   2256  CB  PRO A1131      23.175  28.667  37.238  1.00 26.61           C  
ATOM   2257  CG  PRO A1131      22.216  27.935  38.146  1.00 26.70           C  
ATOM   2258  CD  PRO A1131      21.090  27.475  37.255  1.00 29.42           C  
ATOM   2259  N   ARG A1132      25.334  26.942  35.662  1.00 22.14           N  
ATOM   2260  CA  ARG A1132      26.442  26.061  35.994  1.00 21.60           C  
ATOM   2261  C   ARG A1132      26.508  25.869  37.503  1.00 19.87           C  
ATOM   2262  O   ARG A1132      26.188  26.775  38.274  1.00 21.84           O  
ATOM   2263  CB  ARG A1132      27.751  26.685  35.494  1.00 25.36           C  
ATOM   2264  CG  ARG A1132      28.553  25.842  34.561  1.00 23.65           C  
ATOM   2265  CD  ARG A1132      29.759  26.587  33.970  1.00 19.19           C  
ATOM   2266  NE  ARG A1132      29.803  26.361  32.530  1.00 19.82           N  
ATOM   2267  CZ  ARG A1132      30.142  25.205  31.971  1.00 22.84           C  
ATOM   2268  NH1 ARG A1132      30.122  25.077  30.653  1.00 22.71           N  
ATOM   2269  NH2 ARG A1132      30.492  24.167  32.725  1.00 19.78           N  
ATOM   2270  N   GLY A1133      26.939  24.686  37.930  1.00 22.26           N  
ATOM   2271  CA  GLY A1133      27.136  24.437  39.339  1.00 23.49           C  
ATOM   2272  C   GLY A1133      28.325  25.215  39.881  1.00 20.59           C  
ATOM   2273  O   GLY A1133      28.990  25.974  39.181  1.00 19.51           O  
ATOM   2274  N   ARG A1134      28.570  25.039  41.174  1.00 18.29           N  
ATOM   2275  CA  ARG A1134      29.690  25.672  41.864  1.00 22.23           C  
ATOM   2276  C   ARG A1134      30.437  24.621  42.671  1.00 23.55           C  
ATOM   2277  O   ARG A1134      29.819  23.716  43.237  1.00 24.36           O  
ATOM   2278  CB  ARG A1134      29.220  26.791  42.803  1.00 21.38           C  
ATOM   2279  CG  ARG A1134      28.632  28.034  42.111  1.00 22.04           C  
ATOM   2280  CD  ARG A1134      29.659  28.724  41.234  1.00 31.55           C  
ATOM   2281  NE  ARG A1134      29.128  29.938  40.626  1.00 34.91           N  
ATOM   2282  CZ  ARG A1134      28.518  29.989  39.446  1.00 32.15           C  
ATOM   2283  NH1 ARG A1134      28.362  28.888  38.717  1.00 28.73           N  
ATOM   2284  NH2 ARG A1134      28.064  31.155  38.991  1.00 36.08           N  
ATOM   2285  N   ILE A1135      31.762  24.723  42.711  1.00 19.82           N  
ATOM   2286  CA  ILE A1135      32.581  23.884  43.582  1.00 19.29           C  
ATOM   2287  C   ILE A1135      33.244  24.801  44.596  1.00 22.33           C  
ATOM   2288  O   ILE A1135      33.969  25.730  44.223  1.00 20.96           O  
ATOM   2289  CB  ILE A1135      33.609  23.044  42.805  1.00 21.06           C  
ATOM   2290  CG1 ILE A1135      34.558  22.361  43.807  1.00 27.40           C  
ATOM   2291  CG2 ILE A1135      34.371  23.878  41.763  1.00 23.46           C  
ATOM   2292  CD1 ILE A1135      35.095  20.988  43.414  1.00 24.16           C  
ATOM   2293  N   VAL A1136      32.942  24.591  45.871  1.00 17.05           N  
ATOM   2294  CA  VAL A1136      33.192  25.606  46.887  1.00 23.07           C  
ATOM   2295  C   VAL A1136      33.765  24.956  48.136  1.00 24.82           C  
ATOM   2296  O   VAL A1136      33.245  23.940  48.608  1.00 23.51           O  
ATOM   2297  CB  VAL A1136      31.904  26.372  47.247  1.00 26.36           C  
ATOM   2298  CG1 VAL A1136      32.195  27.424  48.303  1.00 32.99           C  
ATOM   2299  CG2 VAL A1136      31.288  26.994  46.018  1.00 31.24           C  
ATOM   2300  N   THR A1137      34.831  25.549  48.671  1.00 21.44           N  
ATOM   2301  CA  THR A1137      35.248  25.345  50.053  1.00 22.77           C  
ATOM   2302  C   THR A1137      35.702  26.692  50.593  1.00 23.87           C  
ATOM   2303  O   THR A1137      36.634  27.291  50.045  1.00 20.95           O  
ATOM   2304  CB  THR A1137      36.370  24.306  50.166  1.00 26.98           C  
ATOM   2305  OG1 THR A1137      35.842  23.009  49.885  1.00 29.64           O  
ATOM   2306  CG2 THR A1137      36.929  24.284  51.556  1.00 24.69           C  
ATOM   2307  N   THR A1138      35.029  27.170  51.642  1.00 24.77           N  
ATOM   2308  CA  THR A1138      35.272  28.512  52.162  1.00 24.18           C  
ATOM   2309  C   THR A1138      36.752  28.708  52.461  1.00 25.44           C  
ATOM   2310  O   THR A1138      37.403  27.839  53.057  1.00 21.46           O  
ATOM   2311  CB  THR A1138      34.435  28.752  53.424  1.00 33.20           C  
ATOM   2312  OG1 THR A1138      33.044  28.593  53.119  1.00 35.47           O  
ATOM   2313  CG2 THR A1138      34.663  30.164  53.972  1.00 29.73           C  
ATOM   2314  N   ASN A1139      37.290  29.829  51.982  1.00 20.54           N  
ATOM   2315  CA  ASN A1139      38.678  30.224  52.177  1.00 23.62           C  
ATOM   2316  C   ASN A1139      39.673  29.315  51.466  1.00 23.58           C  
ATOM   2317  O   ASN A1139      40.858  29.353  51.778  1.00 21.05           O  
ATOM   2318  CB  ASN A1139      39.021  30.323  53.666  1.00 24.84           C  
ATOM   2319  CG  ASN A1139      38.364  31.511  54.320  1.00 34.18           C  
ATOM   2320  OD1 ASN A1139      38.235  32.565  53.703  1.00 34.03           O  
ATOM   2321  ND2 ASN A1139      37.941  31.353  55.571  1.00 31.66           N  
ATOM   2322  N   ILE A1140      39.231  28.508  50.500  1.00 20.81           N  
ATOM   2323  CA  ILE A1140      40.175  27.787  49.652  1.00 18.42           C  
ATOM   2324  C   ILE A1140      39.848  28.005  48.173  1.00 19.37           C  
ATOM   2325  O   ILE A1140      40.733  28.367  47.388  1.00 18.45           O  
ATOM   2326  CB  ILE A1140      40.225  26.284  49.992  1.00 17.66           C  
ATOM   2327  CG1 ILE A1140      40.393  26.074  51.498  1.00 18.43           C  
ATOM   2328  CG2 ILE A1140      41.402  25.610  49.269  1.00 19.80           C  
ATOM   2329  CD1 ILE A1140      40.519  24.611  51.899  1.00 20.59           C  
ATOM   2330  N   TYR A1141      38.602  27.751  47.763  1.00 18.10           N  
ATOM   2331  CA  TYR A1141      38.242  27.967  46.365  1.00 16.61           C  
ATOM   2332  C   TYR A1141      36.745  28.206  46.254  1.00 16.72           C  
ATOM   2333  O   TYR A1141      35.959  27.784  47.106  1.00 16.98           O  
ATOM   2334  CB  TYR A1141      38.662  26.804  45.459  1.00 16.51           C  
ATOM   2335  CG  TYR A1141      38.242  25.449  45.992  1.00 19.62           C  
ATOM   2336  CD1 TYR A1141      36.963  24.961  45.784  1.00 20.27           C  
ATOM   2337  CD2 TYR A1141      39.122  24.683  46.744  1.00 19.97           C  
ATOM   2338  CE1 TYR A1141      36.575  23.725  46.300  1.00 22.63           C  
ATOM   2339  CE2 TYR A1141      38.749  23.455  47.260  1.00 19.72           C  
ATOM   2340  CZ  TYR A1141      37.474  22.983  47.038  1.00 22.86           C  
ATOM   2341  OH  TYR A1141      37.112  21.766  47.562  1.00 26.12           O  
ATOM   2342  N   LEU A1142      36.371  28.900  45.183  1.00 14.83           N  
ATOM   2343  CA  LEU A1142      34.961  29.076  44.829  1.00 16.79           C  
ATOM   2344  C   LEU A1142      34.922  29.263  43.312  1.00 17.19           C  
ATOM   2345  O   LEU A1142      35.174  30.366  42.822  1.00 15.78           O  
ATOM   2346  CB  LEU A1142      34.351  30.261  45.567  1.00 18.50           C  
ATOM   2347  CG  LEU A1142      32.828  30.242  45.775  1.00 26.36           C  
ATOM   2348  CD1 LEU A1142      32.360  31.350  46.709  1.00 29.10           C  
ATOM   2349  CD2 LEU A1142      32.039  30.287  44.466  1.00 30.97           C  
ATOM   2350  N   ASN A1143      34.608  28.186  42.583  1.00 15.08           N  
ATOM   2351  CA  ASN A1143      34.690  28.161  41.128  1.00 15.13           C  
ATOM   2352  C   ASN A1143      33.399  27.619  40.534  1.00 19.04           C  
ATOM   2353  O   ASN A1143      32.633  26.924  41.207  1.00 17.76           O  
ATOM   2354  CB  ASN A1143      35.851  27.286  40.651  1.00 16.70           C  
ATOM   2355  CG  ASN A1143      37.151  27.627  41.339  1.00 17.52           C  
ATOM   2356  OD1 ASN A1143      37.715  26.803  42.067  1.00 17.63           O  
ATOM   2357  ND2 ASN A1143      37.623  28.853  41.138  1.00 17.91           N  
ATOM   2358  N   SER A1144      33.189  27.915  39.248  1.00 17.02           N  
ATOM   2359  CA  SER A1144      32.135  27.250  38.485  1.00 18.47           C  
ATOM   2360  C   SER A1144      32.576  25.825  38.170  1.00 20.06           C  
ATOM   2361  O   SER A1144      33.763  25.569  37.938  1.00 17.75           O  
ATOM   2362  CB  SER A1144      31.837  28.015  37.185  1.00 19.21           C  
ATOM   2363  OG  SER A1144      31.385  29.343  37.447  1.00 19.23           O  
ATOM   2364  N   THR A1145      31.630  24.883  38.187  1.00 15.39           N  
ATOM   2365  CA  THR A1145      31.971  23.510  37.816  1.00 17.90           C  
ATOM   2366  C   THR A1145      32.146  23.405  36.303  1.00 19.26           C  
ATOM   2367  O   THR A1145      31.317  23.901  35.530  1.00 20.32           O  
ATOM   2368  CB  THR A1145      30.897  22.512  38.302  1.00 20.83           C  
ATOM   2369  OG1 THR A1145      29.617  22.939  37.860  1.00 27.04           O  
ATOM   2370  CG2 THR A1145      30.854  22.410  39.824  1.00 21.93           C  
ATOM   2371  N   LEU A1146      33.223  22.749  35.875  1.00 15.96           N  
ATOM   2372  CA  LEU A1146      33.525  22.639  34.451  1.00 17.93           C  
ATOM   2373  C   LEU A1146      33.140  21.298  33.833  1.00 18.01           C  
ATOM   2374  O   LEU A1146      32.951  21.221  32.618  1.00 18.87           O  
ATOM   2375  CB  LEU A1146      35.021  22.871  34.213  1.00 15.46           C  
ATOM   2376  CG  LEU A1146      35.616  24.176  34.743  1.00 17.83           C  
ATOM   2377  CD1 LEU A1146      37.122  24.163  34.552  1.00 16.17           C  
ATOM   2378  CD2 LEU A1146      34.970  25.366  34.020  1.00 17.22           C  
ATOM   2379  N   TYR A1147      33.076  20.222  34.620  1.00 16.92           N  
ATOM   2380  CA  TYR A1147      32.769  18.898  34.084  1.00 16.42           C  
ATOM   2381  C   TYR A1147      31.253  18.727  34.166  1.00 22.65           C  
ATOM   2382  O   TYR A1147      30.722  18.060  35.047  1.00 24.50           O  
ATOM   2383  CB  TYR A1147      33.492  17.809  34.868  1.00 18.47           C  
ATOM   2384  CG  TYR A1147      35.009  17.959  34.985  1.00 17.05           C  
ATOM   2385  CD1 TYR A1147      35.761  18.602  34.001  1.00 18.71           C  
ATOM   2386  CD2 TYR A1147      35.681  17.428  36.077  1.00 17.14           C  
ATOM   2387  CE1 TYR A1147      37.149  18.717  34.123  1.00 17.06           C  
ATOM   2388  CE2 TYR A1147      37.047  17.536  36.209  1.00 19.54           C  
ATOM   2389  CZ  TYR A1147      37.775  18.187  35.234  1.00 15.61           C  
ATOM   2390  OH  TYR A1147      39.135  18.275  35.390  1.00 16.64           O  
ATOM   2391  N   MET A1148      30.552  19.384  33.251  1.00 21.12           N  
ATOM   2392  CA  MET A1148      29.093  19.379  33.212  1.00 22.01           C  
ATOM   2393  C   MET A1148      28.613  19.316  31.778  1.00 22.17           C  
ATOM   2394  O   MET A1148      29.216  19.903  30.876  1.00 21.73           O  
ATOM   2395  CB  MET A1148      28.449  20.654  33.770  1.00 25.82           C  
ATOM   2396  CG  MET A1148      28.644  20.979  35.197  1.00 33.02           C  
ATOM   2397  SD  MET A1148      27.505  22.336  35.513  1.00 30.40           S  
ATOM   2398  CE  MET A1148      26.059  21.453  36.055  1.00 26.01           C  
ATOM   2399  N   GLY A1149      27.463  18.696  31.595  1.00 22.36           N  
ATOM   2400  CA  GLY A1149      26.755  18.811  30.343  1.00 24.61           C  
ATOM   2401  C   GLY A1149      27.261  17.847  29.293  1.00 24.75           C  
ATOM   2402  O   GLY A1149      28.126  17.005  29.518  1.00 21.11           O  
ATOM   2403  N   THR A1150      26.705  18.016  28.100  1.00 23.48           N  
ATOM   2404  CA  THR A1150      26.949  17.117  26.983  1.00 24.76           C  
ATOM   2405  C   THR A1150      28.385  17.220  26.484  1.00 24.54           C  
ATOM   2406  O   THR A1150      28.903  18.320  26.278  1.00 29.14           O  
ATOM   2407  CB  THR A1150      25.980  17.457  25.850  1.00 24.57           C  
ATOM   2408  OG1 THR A1150      24.646  17.374  26.348  1.00 30.14           O  
ATOM   2409  CG2 THR A1150      26.127  16.485  24.732  1.00 28.31           C  
ATOM   2410  N   LYS A1151      29.020  16.073  26.271  1.00 21.64           N  
ATOM   2411  CA  LYS A1151      30.386  16.026  25.767  1.00 23.03           C  
ATOM   2412  C   LYS A1151      30.423  15.899  24.247  1.00 23.66           C  
ATOM   2413  O   LYS A1151      29.559  15.255  23.643  1.00 22.87           O  
ATOM   2414  CB  LYS A1151      31.145  14.865  26.405  1.00 23.27           C  
ATOM   2415  CG  LYS A1151      31.246  14.987  27.926  1.00 25.05           C  
ATOM   2416  CD  LYS A1151      32.312  14.089  28.504  1.00 28.31           C  
ATOM   2417  CE  LYS A1151      31.884  12.635  28.529  1.00 39.07           C  
ATOM   2418  NZ  LYS A1151      30.702  12.393  29.406  1.00 41.56           N  
ATOM   2419  N   PHE A1152      31.414  16.545  23.638  1.00 20.61           N  
ATOM   2420  CA  PHE A1152      31.756  16.379  22.233  1.00 20.54           C  
ATOM   2421  C   PHE A1152      33.021  15.540  22.105  1.00 22.27           C  
ATOM   2422  O   PHE A1152      33.923  15.602  22.947  1.00 24.30           O  
ATOM   2423  CB  PHE A1152      32.022  17.721  21.532  1.00 23.75           C  
ATOM   2424  CG  PHE A1152      30.791  18.564  21.274  1.00 25.17           C  
ATOM   2425  CD1 PHE A1152      29.540  18.174  21.716  1.00 23.85           C  
ATOM   2426  CD2 PHE A1152      30.904  19.751  20.558  1.00 26.67           C  
ATOM   2427  CE1 PHE A1152      28.429  18.965  21.477  1.00 25.70           C  
ATOM   2428  CE2 PHE A1152      29.781  20.548  20.301  1.00 24.93           C  
ATOM   2429  CZ  PHE A1152      28.554  20.156  20.760  1.00 25.20           C  
ATOM   2430  N   ILE A1153      33.103  14.797  21.012  1.00 22.09           N  
ATOM   2431  CA  ILE A1153      34.312  14.092  20.612  1.00 21.47           C  
ATOM   2432  C   ILE A1153      34.601  14.466  19.169  1.00 22.65           C  
ATOM   2433  O   ILE A1153      33.726  14.334  18.305  1.00 24.22           O  
ATOM   2434  CB  ILE A1153      34.162  12.564  20.740  1.00 22.48           C  
ATOM   2435  CG1 ILE A1153      33.846  12.162  22.184  1.00 25.98           C  
ATOM   2436  CG2 ILE A1153      35.427  11.881  20.242  1.00 24.34           C  
ATOM   2437  CD1 ILE A1153      33.432  10.712  22.344  1.00 29.09           C  
ATOM   2438  N   ILE A1154      35.817  14.924  18.902  1.00 20.31           N  
ATOM   2439  CA  ILE A1154      36.221  15.324  17.558  1.00 18.32           C  
ATOM   2440  C   ILE A1154      36.712  14.094  16.808  1.00 23.35           C  
ATOM   2441  O   ILE A1154      37.562  13.351  17.311  1.00 24.43           O  
ATOM   2442  CB  ILE A1154      37.305  16.411  17.618  1.00 20.68           C  
ATOM   2443  CG1 ILE A1154      36.794  17.604  18.429  1.00 22.73           C  
ATOM   2444  CG2 ILE A1154      37.686  16.854  16.238  1.00 20.38           C  
ATOM   2445  CD1 ILE A1154      37.882  18.606  18.783  1.00 22.01           C  
ATOM   2446  N   LYS A1155      36.183  13.875  15.603  1.00 24.88           N  
ATOM   2447  CA  LYS A1155      36.474  12.673  14.826  1.00 25.39           C  
ATOM   2448  C   LYS A1155      37.165  13.037  13.517  1.00 25.60           C  
ATOM   2449  O   LYS A1155      36.764  13.984  12.836  1.00 24.11           O  
ATOM   2450  CB  LYS A1155      35.191  11.879  14.518  1.00 26.86           C  
ATOM   2451  CG  LYS A1155      34.336  11.501  15.729  1.00 24.99           C  
ATOM   2452  CD  LYS A1155      35.065  10.563  16.677  1.00 30.60           C  
ATOM   2453  CE  LYS A1155      35.327   9.201  16.039  1.00 32.10           C  
ATOM   2454  NZ  LYS A1155      36.111   8.311  16.938  1.00 32.45           N  
ATOM   2455  N   LYS A1156      38.189  12.263  13.157  1.00 28.81           N  
ATOM   2456  CA  LYS A1156      38.923  12.513  11.922  1.00 32.27           C  
ATOM   2457  C   LYS A1156      38.024  12.317  10.708  1.00 34.35           C  
ATOM   2458  O   LYS A1156      37.281  11.337  10.621  1.00 33.41           O  
ATOM   2459  CB  LYS A1156      40.125  11.575  11.812  1.00 37.36           C  
ATOM   2460  CG  LYS A1156      41.394  12.061  12.467  1.00 42.38           C  
ATOM   2461  CD  LYS A1156      42.492  11.006  12.338  1.00 40.49           C  
ATOM   2462  CE  LYS A1156      43.634  11.262  13.312  1.00 41.46           C  
ATOM   2463  NZ  LYS A1156      44.825  10.420  13.007  1.00 46.66           N  
ATOM   2464  N   TYR A1157      38.104  13.249   9.763  1.00 35.32           N  
ATOM   2465  CA  TYR A1157      37.443  13.068   8.481  1.00 37.74           C  
ATOM   2466  C   TYR A1157      38.475  13.156   7.365  1.00 42.19           C  
ATOM   2467  O   TYR A1157      38.922  12.128   6.849  1.00 47.58           O  
ATOM   2468  CB  TYR A1157      36.333  14.098   8.287  1.00 38.31           C  
ATOM   2469  CG  TYR A1157      35.817  14.186   6.868  1.00 41.06           C  
ATOM   2470  CD1 TYR A1157      35.121  13.130   6.291  1.00 46.71           C  
ATOM   2471  CD2 TYR A1157      36.027  15.326   6.104  1.00 43.82           C  
ATOM   2472  CE1 TYR A1157      34.649  13.211   4.987  1.00 52.80           C  
ATOM   2473  CE2 TYR A1157      35.560  15.419   4.806  1.00 46.87           C  
ATOM   2474  CZ  TYR A1157      34.873  14.361   4.251  1.00 51.33           C  
ATOM   2475  OH  TYR A1157      34.412  14.454   2.958  1.00 55.75           O  
ATOM   2476  N   ALA A1158      38.890  14.375   7.017  1.00 43.77           N  
ATOM   2477  CA  ALA A1158      39.777  14.599   5.881  1.00 48.43           C  
ATOM   2478  C   ALA A1158      41.257  14.566   6.238  1.00 53.90           C  
ATOM   2479  O   ALA A1158      42.082  14.306   5.354  1.00 52.93           O  
ATOM   2480  CB  ALA A1158      39.465  15.947   5.217  1.00 44.71           C  
ATOM   2481  N   SER A1159      41.622  14.834   7.491  1.00 54.00           N  
ATOM   2482  CA  SER A1159      43.033  14.950   7.828  1.00 54.92           C  
ATOM   2483  C   SER A1159      43.733  13.606   7.679  1.00 61.21           C  
ATOM   2484  O   SER A1159      43.201  12.559   8.062  1.00 62.21           O  
ATOM   2485  CB  SER A1159      43.213  15.477   9.248  1.00 50.39           C  
ATOM   2486  OG  SER A1159      44.592  15.513   9.591  1.00 56.70           O  
ATOM   2487  N   GLY A1160      44.935  13.646   7.108  1.00 60.41           N  
ATOM   2488  CA  GLY A1160      45.713  12.445   6.895  1.00 64.04           C  
ATOM   2489  C   GLY A1160      46.905  12.319   7.822  1.00 65.97           C  
ATOM   2490  O   GLY A1160      47.654  11.340   7.731  1.00 68.85           O  
ATOM   2491  N   ASN A1161      47.106  13.302   8.703  1.00 58.44           N  
ATOM   2492  CA  ASN A1161      48.152  13.184   9.710  1.00 57.89           C  
ATOM   2493  C   ASN A1161      47.945  11.910  10.514  1.00 56.49           C  
ATOM   2494  O   ASN A1161      46.816  11.547  10.854  1.00 52.88           O  
ATOM   2495  CB  ASN A1161      48.150  14.391  10.650  1.00 54.48           C  
ATOM   2496  CG  ASN A1161      48.635  15.661   9.979  1.00 57.58           C  
ATOM   2497  OD1 ASN A1161      47.916  16.264   9.178  1.00 58.15           O  
ATOM   2498  ND2 ASN A1161      49.854  16.085  10.315  1.00 51.63           N  
ATOM   2499  N   LYS A1162      49.045  11.217  10.802  1.00 55.62           N  
ATOM   2500  CA  LYS A1162      48.952   9.988  11.582  1.00 60.96           C  
ATOM   2501  C   LYS A1162      48.538  10.274  13.022  1.00 52.53           C  
ATOM   2502  O   LYS A1162      47.783   9.499  13.625  1.00 51.58           O  
ATOM   2503  CB  LYS A1162      50.289   9.237  11.535  1.00 62.68           C  
ATOM   2504  CG  LYS A1162      51.530  10.141  11.461  1.00 71.26           C  
ATOM   2505  CD  LYS A1162      52.039  10.558  12.852  1.00 70.96           C  
ATOM   2506  CE  LYS A1162      53.141  11.631  12.786  1.00 74.90           C  
ATOM   2507  NZ  LYS A1162      53.495  12.207  14.123  1.00 85.39           N  
ATOM   2508  N   ASP A1163      49.009  11.386  13.587  1.00 49.19           N  
ATOM   2509  CA  ASP A1163      48.808  11.630  15.003  1.00 43.31           C  
ATOM   2510  C   ASP A1163      47.376  12.096  15.264  1.00 40.42           C  
ATOM   2511  O   ASP A1163      46.571  12.288  14.346  1.00 38.73           O  
ATOM   2512  CB  ASP A1163      49.852  12.617  15.536  1.00 40.19           C  
ATOM   2513  CG  ASP A1163      49.756  14.008  14.914  1.00 39.21           C  
ATOM   2514  OD1 ASP A1163      48.658  14.444  14.521  1.00 41.04           O  
ATOM   2515  OD2 ASP A1163      50.798  14.693  14.845  1.00 42.15           O  
ATOM   2516  N   ASN A1164      47.055  12.278  16.546  1.00 35.64           N  
ATOM   2517  CA  ASN A1164      45.710  12.623  16.981  1.00 34.91           C  
ATOM   2518  C   ASN A1164      45.548  14.104  17.287  1.00 27.40           C  
ATOM   2519  O   ASN A1164      44.635  14.468  18.032  1.00 27.26           O  
ATOM   2520  CB  ASN A1164      45.324  11.799  18.209  1.00 37.44           C  
ATOM   2521  CG  ASN A1164      45.125  10.337  17.885  1.00 41.13           C  
ATOM   2522  OD1 ASN A1164      44.481   9.993  16.896  1.00 41.94           O  
ATOM   2523  ND2 ASN A1164      45.678   9.468  18.717  1.00 37.60           N  
ATOM   2524  N   ILE A1165      46.398  14.960  16.722  1.00 27.57           N  
ATOM   2525  CA  ILE A1165      46.392  16.384  17.036  1.00 25.60           C  
ATOM   2526  C   ILE A1165      45.482  17.112  16.058  1.00 24.97           C  
ATOM   2527  O   ILE A1165      45.604  16.932  14.842  1.00 26.54           O  
ATOM   2528  CB  ILE A1165      47.815  16.957  16.985  1.00 28.34           C  
ATOM   2529  CG1 ILE A1165      48.679  16.326  18.073  1.00 27.39           C  
ATOM   2530  CG2 ILE A1165      47.782  18.458  17.137  1.00 27.13           C  
ATOM   2531  CD1 ILE A1165      50.131  16.707  17.954  1.00 31.72           C  
ATOM   2532  N   VAL A1166      44.585  17.950  16.587  1.00 25.35           N  
ATOM   2533  CA  VAL A1166      43.667  18.744  15.773  1.00 22.15           C  
ATOM   2534  C   VAL A1166      44.360  20.041  15.358  1.00 24.94           C  
ATOM   2535  O   VAL A1166      44.763  20.842  16.210  1.00 21.96           O  
ATOM   2536  CB  VAL A1166      42.363  19.050  16.529  1.00 22.80           C  
ATOM   2537  CG1 VAL A1166      41.407  19.798  15.617  1.00 24.32           C  
ATOM   2538  CG2 VAL A1166      41.709  17.778  17.080  1.00 21.05           C  
ATOM   2539  N   ARG A1167      44.460  20.275  14.052  1.00 27.78           N  
ATOM   2540  CA  ARG A1167      45.175  21.426  13.520  1.00 25.58           C  
ATOM   2541  C   ARG A1167      44.225  22.391  12.827  1.00 27.75           C  
ATOM   2542  O   ARG A1167      43.117  22.034  12.427  1.00 24.52           O  
ATOM   2543  CB  ARG A1167      46.263  20.982  12.540  1.00 30.28           C  
ATOM   2544  CG  ARG A1167      47.351  20.170  13.194  1.00 32.13           C  
ATOM   2545  CD  ARG A1167      48.333  19.627  12.183  1.00 35.97           C  
ATOM   2546  NE  ARG A1167      49.504  19.094  12.865  1.00 39.24           N  
ATOM   2547  CZ  ARG A1167      49.598  17.853  13.327  1.00 33.86           C  
ATOM   2548  NH1 ARG A1167      48.592  17.006  13.172  1.00 38.30           N  
ATOM   2549  NH2 ARG A1167      50.708  17.457  13.938  1.00 43.40           N  
ATOM   2550  N   ASN A1168      44.683  23.634  12.702  1.00 28.29           N  
ATOM   2551  CA  ASN A1168      43.914  24.672  12.029  1.00 30.50           C  
ATOM   2552  C   ASN A1168      43.477  24.221  10.639  1.00 28.05           C  
ATOM   2553  O   ASN A1168      44.276  23.686   9.869  1.00 31.11           O  
ATOM   2554  CB  ASN A1168      44.757  25.942  11.923  1.00 29.55           C  
ATOM   2555  CG  ASN A1168      43.968  27.108  11.415  1.00 33.01           C  
ATOM   2556  OD1 ASN A1168      42.866  27.374  11.891  1.00 36.22           O  
ATOM   2557  ND2 ASN A1168      44.518  27.817  10.439  1.00 37.65           N  
ATOM   2558  N   ASN A1169      42.198  24.434  10.332  1.00 32.38           N  
ATOM   2559  CA  ASN A1169      41.566  24.107   9.056  1.00 28.83           C  
ATOM   2560  C   ASN A1169      41.360  22.616   8.842  1.00 30.29           C  
ATOM   2561  O   ASN A1169      40.963  22.214   7.743  1.00 32.63           O  
ATOM   2562  CB  ASN A1169      42.342  24.680   7.861  1.00 34.64           C  
ATOM   2563  CG  ASN A1169      42.338  26.186   7.842  1.00 38.47           C  
ATOM   2564  OD1 ASN A1169      41.328  26.816   8.142  1.00 39.75           O  
ATOM   2565  ND2 ASN A1169      43.471  26.777   7.487  1.00 44.98           N  
ATOM   2566  N   ASP A1170      41.603  21.781   9.848  1.00 29.92           N  
ATOM   2567  CA  ASP A1170      41.224  20.379   9.728  1.00 30.05           C  
ATOM   2568  C   ASP A1170      39.717  20.267   9.512  1.00 31.94           C  
ATOM   2569  O   ASP A1170      38.930  21.000  10.117  1.00 28.62           O  
ATOM   2570  CB  ASP A1170      41.624  19.595  10.979  1.00 27.63           C  
ATOM   2571  CG  ASP A1170      43.081  19.142  10.965  1.00 28.89           C  
ATOM   2572  OD1 ASP A1170      43.838  19.526  10.048  1.00 31.31           O  
ATOM   2573  OD2 ASP A1170      43.470  18.396  11.892  1.00 27.11           O  
ATOM   2574  N   ARG A1171      39.312  19.350   8.639  1.00 29.62           N  
ATOM   2575  CA  ARG A1171      37.901  19.051   8.423  1.00 30.18           C  
ATOM   2576  C   ARG A1171      37.561  17.784   9.204  1.00 27.83           C  
ATOM   2577  O   ARG A1171      38.214  16.749   9.031  1.00 34.44           O  
ATOM   2578  CB  ARG A1171      37.611  18.912   6.925  1.00 29.94           C  
ATOM   2579  CG  ARG A1171      38.004  20.179   6.127  1.00 34.80           C  
ATOM   2580  CD  ARG A1171      38.029  19.979   4.603  1.00 42.38           C  
ATOM   2581  NE  ARG A1171      36.745  19.505   4.085  1.00 55.06           N  
ATOM   2582  CZ  ARG A1171      35.747  20.302   3.704  1.00 59.29           C  
ATOM   2583  NH1 ARG A1171      34.610  19.779   3.256  1.00 56.27           N  
ATOM   2584  NH2 ARG A1171      35.882  21.622   3.772  1.00 59.91           N  
ATOM   2585  N   VAL A1172      36.566  17.875  10.093  1.00 28.19           N  
ATOM   2586  CA  VAL A1172      36.303  16.840  11.087  1.00 22.17           C  
ATOM   2587  C   VAL A1172      34.808  16.539  11.132  1.00 24.13           C  
ATOM   2588  O   VAL A1172      33.990  17.251  10.554  1.00 25.61           O  
ATOM   2589  CB  VAL A1172      36.783  17.256  12.496  1.00 25.08           C  
ATOM   2590  CG1 VAL A1172      38.202  17.800  12.457  1.00 22.56           C  
ATOM   2591  CG2 VAL A1172      35.828  18.302  13.097  1.00 21.78           C  
ATOM   2592  N   TYR A1173      34.463  15.470  11.851  1.00 27.45           N  
ATOM   2593  CA  TYR A1173      33.121  15.259  12.377  1.00 26.22           C  
ATOM   2594  C   TYR A1173      33.119  15.513  13.878  1.00 24.10           C  
ATOM   2595  O   TYR A1173      34.128  15.304  14.558  1.00 24.54           O  
ATOM   2596  CB  TYR A1173      32.611  13.834  12.161  1.00 29.77           C  
ATOM   2597  CG  TYR A1173      32.553  13.337  10.744  1.00 35.26           C  
ATOM   2598  CD1 TYR A1173      31.954  14.083   9.736  1.00 30.38           C  
ATOM   2599  CD2 TYR A1173      33.084  12.101  10.419  1.00 35.46           C  
ATOM   2600  CE1 TYR A1173      31.903  13.602   8.431  1.00 36.14           C  
ATOM   2601  CE2 TYR A1173      33.035  11.615   9.132  1.00 44.15           C  
ATOM   2602  CZ  TYR A1173      32.444  12.362   8.142  1.00 41.23           C  
ATOM   2603  OH  TYR A1173      32.406  11.857   6.863  1.00 49.15           O  
ATOM   2604  N   ILE A1174      31.962  15.915  14.397  1.00 23.74           N  
ATOM   2605  CA  ILE A1174      31.740  16.075  15.830  1.00 22.01           C  
ATOM   2606  C   ILE A1174      30.746  15.016  16.269  1.00 25.46           C  
ATOM   2607  O   ILE A1174      29.601  15.003  15.798  1.00 27.64           O  
ATOM   2608  CB  ILE A1174      31.209  17.474  16.181  1.00 21.66           C  
ATOM   2609  CG1 ILE A1174      32.188  18.556  15.734  1.00 24.35           C  
ATOM   2610  CG2 ILE A1174      30.954  17.573  17.677  1.00 21.38           C  
ATOM   2611  CD1 ILE A1174      33.573  18.360  16.285  1.00 27.04           C  
ATOM   2612  N   ASN A1175      31.178  14.132  17.164  1.00 24.66           N  
ATOM   2613  CA  ASN A1175      30.271  13.209  17.828  1.00 23.88           C  
ATOM   2614  C   ASN A1175      29.800  13.805  19.144  1.00 28.78           C  
ATOM   2615  O   ASN A1175      30.529  14.542  19.817  1.00 25.89           O  
ATOM   2616  CB  ASN A1175      30.939  11.853  18.074  1.00 28.15           C  
ATOM   2617  CG  ASN A1175      31.016  11.003  16.810  1.00 26.27           C  
ATOM   2618  OD1 ASN A1175      30.692  11.467  15.717  1.00 29.12           O  
ATOM   2619  ND2 ASN A1175      31.463   9.760  16.955  1.00 30.92           N  
ATOM   2620  N   VAL A1176      28.558  13.497  19.489  1.00 25.62           N  
ATOM   2621  CA  VAL A1176      27.899  13.979  20.692  1.00 27.45           C  
ATOM   2622  C   VAL A1176      27.591  12.767  21.561  1.00 27.83           C  
ATOM   2623  O   VAL A1176      27.067  11.763  21.064  1.00 29.35           O  
ATOM   2624  CB  VAL A1176      26.615  14.745  20.334  1.00 28.26           C  
ATOM   2625  CG1 VAL A1176      25.931  15.262  21.562  1.00 29.25           C  
ATOM   2626  CG2 VAL A1176      26.932  15.871  19.368  1.00 33.17           C  
ATOM   2627  N   VAL A1177      27.928  12.843  22.844  1.00 26.43           N  
ATOM   2628  CA  VAL A1177      27.755  11.716  23.758  1.00 25.29           C  
ATOM   2629  C   VAL A1177      26.451  11.891  24.522  1.00 26.07           C  
ATOM   2630  O   VAL A1177      26.270  12.874  25.247  1.00 26.89           O  
ATOM   2631  CB  VAL A1177      28.943  11.582  24.722  1.00 29.56           C  
ATOM   2632  CG1 VAL A1177      28.734  10.400  25.651  1.00 32.09           C  
ATOM   2633  CG2 VAL A1177      30.233  11.407  23.945  1.00 25.96           C  
ATOM   2634  N   VAL A1178      25.541  10.934  24.367  1.00 31.76           N  
ATOM   2635  CA  VAL A1178      24.242  10.958  25.029  1.00 30.59           C  
ATOM   2636  C   VAL A1178      24.030   9.595  25.675  1.00 35.37           C  
ATOM   2637  O   VAL A1178      23.966   8.577  24.974  1.00 36.27           O  
ATOM   2638  CB  VAL A1178      23.101  11.283  24.051  1.00 33.28           C  
ATOM   2639  CG1 VAL A1178      21.771  11.314  24.780  1.00 38.15           C  
ATOM   2640  CG2 VAL A1178      23.348  12.618  23.365  1.00 31.66           C  
ATOM   2641  N   LYS A1179      23.948   9.572  27.004  1.00 44.65           N  
ATOM   2642  CA  LYS A1179      23.790   8.335  27.773  1.00 46.36           C  
ATOM   2643  C   LYS A1179      24.786   7.271  27.317  1.00 47.13           C  
ATOM   2644  O   LYS A1179      24.424   6.141  26.984  1.00 46.91           O  
ATOM   2645  CB  LYS A1179      22.350   7.825  27.689  1.00 47.04           C  
ATOM   2646  CG  LYS A1179      21.342   8.809  28.266  1.00 49.10           C  
ATOM   2647  CD  LYS A1179      19.907   8.440  27.925  1.00 51.05           C  
ATOM   2648  CE  LYS A1179      19.022   9.684  27.908  1.00 58.94           C  
ATOM   2649  NZ  LYS A1179      18.130   9.778  29.098  1.00 68.14           N  
ATOM   2650  N   ASN A1180      26.059   7.667  27.283  1.00 43.40           N  
ATOM   2651  CA  ASN A1180      27.207   6.808  26.994  1.00 47.70           C  
ATOM   2652  C   ASN A1180      27.222   6.271  25.567  1.00 46.81           C  
ATOM   2653  O   ASN A1180      27.964   5.331  25.268  1.00 53.25           O  
ATOM   2654  CB  ASN A1180      27.298   5.649  27.991  1.00 54.54           C  
ATOM   2655  CG  ASN A1180      27.592   6.121  29.401  1.00 56.91           C  
ATOM   2656  OD1 ASN A1180      28.716   6.523  29.713  1.00 67.29           O  
ATOM   2657  ND2 ASN A1180      26.584   6.076  30.262  1.00 58.36           N  
ATOM   2658  N   LYS A1181      26.441   6.858  24.668  1.00 40.24           N  
ATOM   2659  CA  LYS A1181      26.412   6.449  23.272  1.00 36.83           C  
ATOM   2660  C   LYS A1181      26.686   7.658  22.392  1.00 28.52           C  
ATOM   2661  O   LYS A1181      26.244   8.765  22.702  1.00 32.65           O  
ATOM   2662  CB  LYS A1181      25.062   5.829  22.929  1.00 38.44           C  
ATOM   2663  CG  LYS A1181      24.857   5.506  21.471  1.00 42.43           C  
ATOM   2664  CD  LYS A1181      23.445   4.981  21.271  1.00 46.11           C  
ATOM   2665  CE  LYS A1181      23.145   4.756  19.819  1.00 45.32           C  
ATOM   2666  NZ  LYS A1181      21.684   4.592  19.589  1.00 51.77           N  
ATOM   2667  N   GLU A1182      27.393   7.446  21.289  1.00 30.34           N  
ATOM   2668  CA  GLU A1182      27.820   8.538  20.427  1.00 35.19           C  
ATOM   2669  C   GLU A1182      26.851   8.731  19.268  1.00 35.57           C  
ATOM   2670  O   GLU A1182      26.485   7.765  18.589  1.00 36.26           O  
ATOM   2671  CB  GLU A1182      29.235   8.290  19.904  1.00 31.14           C  
ATOM   2672  CG  GLU A1182      30.283   8.476  20.974  1.00 32.20           C  
ATOM   2673  CD  GLU A1182      31.632   7.945  20.576  1.00 32.77           C  
ATOM   2674  OE1 GLU A1182      32.236   7.215  21.385  1.00 39.84           O  
ATOM   2675  OE2 GLU A1182      32.093   8.256  19.461  1.00 35.50           O  
ATOM   2676  N   TYR A1183      26.449   9.983  19.056  1.00 29.11           N  
ATOM   2677  CA  TYR A1183      25.625  10.461  17.951  1.00 29.55           C  
ATOM   2678  C   TYR A1183      26.430  11.462  17.132  1.00 28.38           C  
ATOM   2679  O   TYR A1183      27.503  11.901  17.543  1.00 28.19           O  
ATOM   2680  CB  TYR A1183      24.337  11.112  18.468  1.00 31.63           C  
ATOM   2681  CG  TYR A1183      23.464  10.163  19.256  1.00 35.95           C  
ATOM   2682  CD1 TYR A1183      23.775   9.828  20.566  1.00 34.57           C  
ATOM   2683  CD2 TYR A1183      22.337   9.589  18.682  1.00 39.82           C  
ATOM   2684  CE1 TYR A1183      22.990   8.956  21.286  1.00 36.56           C  
ATOM   2685  CE2 TYR A1183      21.537   8.711  19.399  1.00 36.88           C  
ATOM   2686  CZ  TYR A1183      21.873   8.398  20.699  1.00 39.05           C  
ATOM   2687  OH  TYR A1183      21.094   7.530  21.424  1.00 41.69           O  
ATOM   2688  N   ARG A1184      25.911  11.843  15.969  1.00 24.00           N  
ATOM   2689  CA  ARG A1184      26.617  12.751  15.073  1.00 29.86           C  
ATOM   2690  C   ARG A1184      25.955  14.122  15.100  1.00 29.93           C  
ATOM   2691  O   ARG A1184      24.733  14.235  14.960  1.00 29.51           O  
ATOM   2692  CB  ARG A1184      26.655  12.203  13.643  1.00 28.07           C  
ATOM   2693  CG  ARG A1184      27.213  13.163  12.593  1.00 27.95           C  
ATOM   2694  CD  ARG A1184      28.717  13.400  12.740  1.00 25.56           C  
ATOM   2695  NE  ARG A1184      29.437  12.223  13.212  1.00 29.99           N  
ATOM   2696  CZ  ARG A1184      29.872  11.238  12.431  1.00 34.11           C  
ATOM   2697  NH1 ARG A1184      29.653  11.267  11.120  1.00 32.46           N  
ATOM   2698  NH2 ARG A1184      30.516  10.212  12.967  1.00 31.70           N  
ATOM   2699  N   LEU A1185      26.763  15.155  15.311  1.00 24.51           N  
ATOM   2700  CA  LEU A1185      26.291  16.525  15.181  1.00 24.33           C  
ATOM   2701  C   LEU A1185      25.994  16.808  13.713  1.00 24.83           C  
ATOM   2702  O   LEU A1185      26.873  16.653  12.861  1.00 29.42           O  
ATOM   2703  CB  LEU A1185      27.343  17.497  15.720  1.00 24.04           C  
ATOM   2704  CG  LEU A1185      26.917  18.960  15.782  1.00 25.84           C  
ATOM   2705  CD1 LEU A1185      25.675  19.069  16.619  1.00 31.47           C  
ATOM   2706  CD2 LEU A1185      28.021  19.853  16.360  1.00 26.47           C  
ATOM   2707  N   ALA A1186      24.759  17.199  13.409  1.00 29.67           N  
ATOM   2708  CA  ALA A1186      24.363  17.370  12.017  1.00 32.21           C  
ATOM   2709  C   ALA A1186      23.142  18.274  11.936  1.00 30.16           C  
ATOM   2710  O   ALA A1186      22.458  18.529  12.930  1.00 28.20           O  
ATOM   2711  CB  ALA A1186      24.081  16.021  11.347  1.00 32.07           C  
ATOM   2712  N   THR A1187      22.882  18.756  10.721  1.00 32.81           N  
ATOM   2713  CA  THR A1187      21.738  19.613  10.451  1.00 32.52           C  
ATOM   2714  C   THR A1187      21.338  19.481   8.987  1.00 32.72           C  
ATOM   2715  O   THR A1187      22.147  19.129   8.123  1.00 30.35           O  
ATOM   2716  CB  THR A1187      22.029  21.084  10.781  1.00 30.29           C  
ATOM   2717  OG1 THR A1187      20.799  21.813  10.858  1.00 31.67           O  
ATOM   2718  CG2 THR A1187      22.913  21.716   9.723  1.00 32.53           C  
ATOM   2719  N   ASN A1188      20.067  19.768   8.725  1.00 35.81           N  
ATOM   2720  CA  ASN A1188      19.559  19.888   7.364  1.00 38.44           C  
ATOM   2721  C   ASN A1188      19.708  21.344   6.941  1.00 34.47           C  
ATOM   2722  O   ASN A1188      18.934  22.206   7.369  1.00 41.39           O  
ATOM   2723  CB  ASN A1188      18.105  19.426   7.279  1.00 40.08           C  
ATOM   2724  CG  ASN A1188      17.593  19.379   5.850  1.00 48.42           C  
ATOM   2725  OD1 ASN A1188      18.211  19.933   4.936  1.00 47.00           O  
ATOM   2726  ND2 ASN A1188      16.458  18.717   5.650  1.00 44.61           N  
ATOM   2727  N   ALA A1189      20.698  21.614   6.092  1.00 34.63           N  
ATOM   2728  CA  ALA A1189      20.974  22.979   5.658  1.00 41.11           C  
ATOM   2729  C   ALA A1189      19.824  23.607   4.878  1.00 48.96           C  
ATOM   2730  O   ALA A1189      19.824  24.829   4.686  1.00 44.61           O  
ATOM   2731  CB  ALA A1189      22.240  23.005   4.808  1.00 38.01           C  
ATOM   2732  N   SER A1190      18.851  22.812   4.433  1.00 43.82           N  
ATOM   2733  CA  SER A1190      17.713  23.336   3.689  1.00 49.47           C  
ATOM   2734  C   SER A1190      16.605  23.892   4.578  1.00 48.67           C  
ATOM   2735  O   SER A1190      15.642  24.451   4.047  1.00 50.72           O  
ATOM   2736  CB  SER A1190      17.138  22.246   2.782  1.00 44.79           C  
ATOM   2737  OG  SER A1190      18.150  21.708   1.948  1.00 51.56           O  
ATOM   2738  N   GLN A1191      16.706  23.762   5.902  1.00 52.81           N  
ATOM   2739  CA  GLN A1191      15.684  24.323   6.777  1.00 51.41           C  
ATOM   2740  C   GLN A1191      15.660  25.848   6.655  1.00 53.07           C  
ATOM   2741  O   GLN A1191      16.619  26.482   6.206  1.00 51.06           O  
ATOM   2742  CB  GLN A1191      15.917  23.901   8.234  1.00 51.28           C  
ATOM   2743  CG  GLN A1191      16.986  24.705   8.986  1.00 51.23           C  
ATOM   2744  CD  GLN A1191      17.205  24.216  10.422  1.00 44.19           C  
ATOM   2745  OE1 GLN A1191      17.864  23.204  10.646  1.00 41.45           O  
ATOM   2746  NE2 GLN A1191      16.669  24.948  11.393  1.00 37.71           N  
ATOM   2747  N   ALA A1192      14.534  26.435   7.049  1.00 52.29           N  
ATOM   2748  CA  ALA A1192      14.342  27.870   6.894  1.00 51.33           C  
ATOM   2749  C   ALA A1192      15.221  28.648   7.867  1.00 48.19           C  
ATOM   2750  O   ALA A1192      15.581  28.160   8.942  1.00 56.55           O  
ATOM   2751  CB  ALA A1192      12.873  28.232   7.111  1.00 58.45           C  
ATOM   2752  N   GLY A1193      15.573  29.868   7.474  1.00 46.71           N  
ATOM   2753  CA  GLY A1193      16.342  30.767   8.310  1.00 41.23           C  
ATOM   2754  C   GLY A1193      17.846  30.600   8.146  1.00 38.94           C  
ATOM   2755  O   GLY A1193      18.351  29.561   7.719  1.00 41.88           O  
ATOM   2756  N   VAL A1194      18.570  31.666   8.496  1.00 34.38           N  
ATOM   2757  CA  VAL A1194      20.031  31.607   8.539  1.00 42.28           C  
ATOM   2758  C   VAL A1194      20.498  30.662   9.646  1.00 39.23           C  
ATOM   2759  O   VAL A1194      21.482  29.928   9.486  1.00 35.75           O  
ATOM   2760  CB  VAL A1194      20.607  33.026   8.716  1.00 39.05           C  
ATOM   2761  CG1 VAL A1194      22.071  32.993   9.151  1.00 33.95           C  
ATOM   2762  CG2 VAL A1194      20.452  33.828   7.428  1.00 51.03           C  
ATOM   2763  N   GLU A1195      19.805  30.665  10.783  1.00 38.30           N  
ATOM   2764  CA  GLU A1195      20.175  29.815  11.907  1.00 33.84           C  
ATOM   2765  C   GLU A1195      19.710  28.392  11.637  1.00 35.16           C  
ATOM   2766  O   GLU A1195      18.506  28.133  11.568  1.00 37.89           O  
ATOM   2767  CB  GLU A1195      19.555  30.344  13.197  1.00 35.14           C  
ATOM   2768  CG  GLU A1195      19.961  31.764  13.558  1.00 36.58           C  
ATOM   2769  CD  GLU A1195      19.126  32.818  12.851  1.00 41.37           C  
ATOM   2770  OE1 GLU A1195      18.050  32.478  12.314  1.00 41.84           O  
ATOM   2771  OE2 GLU A1195      19.546  33.993  12.842  1.00 49.20           O  
ATOM   2772  N   LYS A1196      20.656  27.467  11.486  1.00 29.11           N  
ATOM   2773  CA  LYS A1196      20.343  26.057  11.300  1.00 28.84           C  
ATOM   2774  C   LYS A1196      20.474  25.361  12.650  1.00 31.22           C  
ATOM   2775  O   LYS A1196      21.582  25.225  13.174  1.00 27.15           O  
ATOM   2776  CB  LYS A1196      21.271  25.421  10.269  1.00 34.16           C  
ATOM   2777  CG  LYS A1196      21.544  26.295   9.055  1.00 37.99           C  
ATOM   2778  CD  LYS A1196      20.291  26.519   8.241  1.00 37.41           C  
ATOM   2779  CE  LYS A1196      20.597  27.283   6.966  1.00 40.51           C  
ATOM   2780  NZ  LYS A1196      19.341  27.734   6.301  1.00 42.10           N  
ATOM   2781  N   ILE A1197      19.344  24.920  13.203  1.00 30.66           N  
ATOM   2782  CA  ILE A1197      19.333  24.232  14.489  1.00 34.59           C  
ATOM   2783  C   ILE A1197      20.034  22.891  14.352  1.00 31.50           C  
ATOM   2784  O   ILE A1197      19.746  22.112  13.435  1.00 32.00           O  
ATOM   2785  CB  ILE A1197      17.890  24.058  14.988  1.00 30.82           C  
ATOM   2786  CG1 ILE A1197      17.258  25.421  15.265  1.00 28.50           C  
ATOM   2787  CG2 ILE A1197      17.841  23.188  16.242  1.00 32.73           C  
ATOM   2788  CD1 ILE A1197      15.759  25.370  15.430  1.00 32.19           C  
ATOM   2789  N   LEU A1198      20.956  22.607  15.265  1.00 27.09           N  
ATOM   2790  CA  LEU A1198      21.747  21.391  15.157  1.00 25.94           C  
ATOM   2791  C   LEU A1198      21.110  20.248  15.937  1.00 26.81           C  
ATOM   2792  O   LEU A1198      20.471  20.450  16.971  1.00 31.04           O  
ATOM   2793  CB  LEU A1198      23.176  21.631  15.653  1.00 26.11           C  
ATOM   2794  CG  LEU A1198      23.891  22.800  14.981  1.00 27.05           C  
ATOM   2795  CD1 LEU A1198      25.290  22.954  15.571  1.00 32.20           C  
ATOM   2796  CD2 LEU A1198      23.967  22.584  13.486  1.00 27.49           C  
ATOM   2797  N   SER A1199      21.314  19.032  15.442  1.00 26.89           N  
ATOM   2798  CA  SER A1199      20.765  17.849  16.079  1.00 28.59           C  
ATOM   2799  C   SER A1199      21.873  16.846  16.344  1.00 25.60           C  
ATOM   2800  O   SER A1199      22.957  16.921  15.765  1.00 31.46           O  
ATOM   2801  CB  SER A1199      19.676  17.199  15.209  1.00 25.12           C  
ATOM   2802  OG  SER A1199      18.585  18.081  15.028  1.00 32.13           O  
ATOM   2803  N   ALA A1200      21.580  15.900  17.233  1.00 25.11           N  
ATOM   2804  CA  ALA A1200      22.417  14.726  17.458  1.00 26.33           C  
ATOM   2805  C   ALA A1200      21.722  13.536  16.806  1.00 29.07           C  
ATOM   2806  O   ALA A1200      20.741  13.014  17.334  1.00 29.67           O  
ATOM   2807  CB  ALA A1200      22.643  14.490  18.947  1.00 28.56           C  
ATOM   2808  N   VAL A1201      22.226  13.102  15.661  1.00 30.38           N  
ATOM   2809  CA  VAL A1201      21.560  12.057  14.901  1.00 34.95           C  
ATOM   2810  C   VAL A1201      22.350  10.763  15.008  1.00 35.05           C  
ATOM   2811  O   VAL A1201      23.556  10.744  15.276  1.00 33.27           O  
ATOM   2812  CB  VAL A1201      21.354  12.450  13.425  1.00 32.91           C  
ATOM   2813  CG1 VAL A1201      20.722  13.825  13.331  1.00 32.66           C  
ATOM   2814  CG2 VAL A1201      22.668  12.401  12.673  1.00 38.23           C  
ATOM   2815  N   GLU A1202      21.634   9.659  14.822  1.00 36.68           N  
ATOM   2816  CA  GLU A1202      22.254   8.347  14.766  1.00 37.32           C  
ATOM   2817  C   GLU A1202      23.291   8.310  13.646  1.00 37.59           C  
ATOM   2818  O   GLU A1202      23.028   8.754  12.525  1.00 38.59           O  
ATOM   2819  CB  GLU A1202      21.167   7.290  14.547  1.00 44.05           C  
ATOM   2820  CG  GLU A1202      21.561   5.887  14.917  1.00 48.38           C  
ATOM   2821  CD  GLU A1202      21.588   5.664  16.414  1.00 54.41           C  
ATOM   2822  OE1 GLU A1202      20.523   5.746  17.072  1.00 54.16           O  
ATOM   2823  OE2 GLU A1202      22.689   5.401  16.931  1.00 51.47           O  
ATOM   2824  N   ILE A1203      24.485   7.797  13.958  1.00 35.83           N  
ATOM   2825  CA  ILE A1203      25.590   7.875  12.998  1.00 41.82           C  
ATOM   2826  C   ILE A1203      25.289   7.126  11.710  1.00 44.11           C  
ATOM   2827  O   ILE A1203      25.561   7.671  10.629  1.00 40.13           O  
ATOM   2828  CB  ILE A1203      26.905   7.444  13.672  1.00 38.73           C  
ATOM   2829  CG1 ILE A1203      27.255   8.438  14.786  1.00 35.54           C  
ATOM   2830  CG2 ILE A1203      28.029   7.379  12.656  1.00 34.14           C  
ATOM   2831  CD1 ILE A1203      28.345   7.975  15.732  1.00 40.73           C  
ATOM   2832  N   PRO A1204      24.726   5.912  11.720  1.00 47.46           N  
ATOM   2833  CA  PRO A1204      24.363   5.278  10.439  1.00 51.92           C  
ATOM   2834  C   PRO A1204      23.308   6.033   9.639  1.00 48.09           C  
ATOM   2835  O   PRO A1204      23.285   5.920   8.408  1.00 57.11           O  
ATOM   2836  CB  PRO A1204      23.852   3.897  10.870  1.00 50.35           C  
ATOM   2837  CG  PRO A1204      24.538   3.628  12.158  1.00 49.44           C  
ATOM   2838  CD  PRO A1204      24.611   4.962  12.844  1.00 45.06           C  
ATOM   2839  N   ASP A1205      22.440   6.802  10.292  1.00 48.04           N  
ATOM   2840  CA  ASP A1205      21.342   7.489   9.625  1.00 46.20           C  
ATOM   2841  C   ASP A1205      21.672   8.925   9.230  1.00 46.71           C  
ATOM   2842  O   ASP A1205      20.752   9.695   8.938  1.00 46.07           O  
ATOM   2843  CB  ASP A1205      20.102   7.493  10.524  1.00 46.95           C  
ATOM   2844  CG  ASP A1205      19.729   6.105  11.020  1.00 57.52           C  
ATOM   2845  OD1 ASP A1205      20.256   5.109  10.475  1.00 55.94           O  
ATOM   2846  OD2 ASP A1205      18.908   6.012  11.962  1.00 58.90           O  
ATOM   2847  N   VAL A1206      22.948   9.316   9.226  1.00 47.55           N  
ATOM   2848  CA  VAL A1206      23.252  10.715   8.939  1.00 42.35           C  
ATOM   2849  C   VAL A1206      22.928  11.047   7.490  1.00 43.21           C  
ATOM   2850  O   VAL A1206      22.568  12.189   7.173  1.00 39.60           O  
ATOM   2851  CB  VAL A1206      24.718  11.050   9.285  1.00 42.00           C  
ATOM   2852  CG1 VAL A1206      25.676  10.430   8.277  1.00 43.92           C  
ATOM   2853  CG2 VAL A1206      24.903  12.555   9.343  1.00 35.80           C  
ATOM   2854  N   GLY A1207      23.019  10.064   6.598  1.00 45.28           N  
ATOM   2855  CA  GLY A1207      22.716  10.272   5.198  1.00 44.02           C  
ATOM   2856  C   GLY A1207      23.464  11.443   4.606  1.00 45.08           C  
ATOM   2857  O   GLY A1207      24.696  11.503   4.661  1.00 44.87           O  
ATOM   2858  N   ASN A1208      22.720  12.401   4.059  1.00 43.49           N  
ATOM   2859  CA  ASN A1208      23.308  13.562   3.405  1.00 46.82           C  
ATOM   2860  C   ASN A1208      23.095  14.846   4.198  1.00 41.91           C  
ATOM   2861  O   ASN A1208      23.217  15.941   3.640  1.00 43.11           O  
ATOM   2862  CB  ASN A1208      22.756  13.699   1.986  1.00 53.77           C  
ATOM   2863  CG  ASN A1208      23.149  12.528   1.097  1.00 53.71           C  
ATOM   2864  OD1 ASN A1208      22.296  11.769   0.636  1.00 57.31           O  
ATOM   2865  ND2 ASN A1208      24.450  12.370   0.866  1.00 57.58           N  
ATOM   2866  N   LEU A1209      22.785  14.732   5.490  1.00 41.17           N  
ATOM   2867  CA  LEU A1209      22.787  15.899   6.362  1.00 35.66           C  
ATOM   2868  C   LEU A1209      24.176  16.526   6.395  1.00 32.85           C  
ATOM   2869  O   LEU A1209      25.191  15.849   6.223  1.00 33.17           O  
ATOM   2870  CB  LEU A1209      22.358  15.504   7.775  1.00 33.74           C  
ATOM   2871  CG  LEU A1209      20.904  15.064   7.951  1.00 34.85           C  
ATOM   2872  CD1 LEU A1209      20.691  14.427   9.316  1.00 33.74           C  
ATOM   2873  CD2 LEU A1209      19.975  16.253   7.762  1.00 34.50           C  
ATOM   2874  N   SER A1210      24.214  17.839   6.598  1.00 32.91           N  
ATOM   2875  CA  SER A1210      25.487  18.528   6.761  1.00 32.44           C  
ATOM   2876  C   SER A1210      26.121  18.152   8.096  1.00 33.77           C  
ATOM   2877  O   SER A1210      25.446  18.157   9.129  1.00 31.75           O  
ATOM   2878  CB  SER A1210      25.278  20.030   6.691  1.00 33.78           C  
ATOM   2879  OG  SER A1210      24.910  20.438   5.388  1.00 39.23           O  
ATOM   2880  N   GLN A1211      27.422  17.846   8.079  1.00 29.22           N  
ATOM   2881  CA  GLN A1211      28.099  17.372   9.284  1.00 28.24           C  
ATOM   2882  C   GLN A1211      29.588  17.708   9.314  1.00 29.39           C  
ATOM   2883  O   GLN A1211      30.241  17.518  10.345  1.00 30.82           O  
ATOM   2884  CB  GLN A1211      27.922  15.855   9.425  1.00 30.80           C  
ATOM   2885  CG  GLN A1211      28.460  15.075   8.234  1.00 30.50           C  
ATOM   2886  CD  GLN A1211      28.446  13.570   8.445  1.00 34.46           C  
ATOM   2887  OE1 GLN A1211      28.343  13.084   9.570  1.00 38.83           O  
ATOM   2888  NE2 GLN A1211      28.545  12.825   7.353  1.00 37.70           N  
ATOM   2889  N   VAL A1212      30.153  18.182   8.208  1.00 27.64           N  
ATOM   2890  CA  VAL A1212      31.594  18.417   8.155  1.00 28.70           C  
ATOM   2891  C   VAL A1212      31.909  19.766   8.785  1.00 27.10           C  
ATOM   2892  O   VAL A1212      31.349  20.795   8.392  1.00 31.56           O  
ATOM   2893  CB  VAL A1212      32.115  18.345   6.713  1.00 32.66           C  
ATOM   2894  CG1 VAL A1212      33.590  18.742   6.667  1.00 31.25           C  
ATOM   2895  CG2 VAL A1212      31.935  16.940   6.158  1.00 35.03           C  
ATOM   2896  N   VAL A1213      32.814  19.767   9.759  1.00 27.50           N  
ATOM   2897  CA  VAL A1213      33.176  20.968  10.506  1.00 26.50           C  
ATOM   2898  C   VAL A1213      34.629  21.314  10.204  1.00 25.69           C  
ATOM   2899  O   VAL A1213      35.502  20.440  10.260  1.00 26.42           O  
ATOM   2900  CB  VAL A1213      32.964  20.767  12.016  1.00 25.52           C  
ATOM   2901  CG1 VAL A1213      33.511  21.971  12.799  1.00 24.98           C  
ATOM   2902  CG2 VAL A1213      31.485  20.538  12.319  1.00 21.14           C  
ATOM   2903  N   VAL A1214      34.886  22.581   9.882  1.00 26.37           N  
ATOM   2904  CA  VAL A1214      36.251  23.089   9.761  1.00 28.28           C  
ATOM   2905  C   VAL A1214      36.660  23.680  11.104  1.00 26.74           C  
ATOM   2906  O   VAL A1214      36.028  24.623  11.593  1.00 26.57           O  
ATOM   2907  CB  VAL A1214      36.370  24.141   8.649  1.00 30.61           C  
ATOM   2908  CG1 VAL A1214      37.825  24.591   8.504  1.00 32.13           C  
ATOM   2909  CG2 VAL A1214      35.855  23.597   7.340  1.00 32.13           C  
ATOM   2910  N   MET A1215      37.719  23.136  11.690  1.00 25.43           N  
ATOM   2911  CA  MET A1215      38.237  23.612  12.965  1.00 25.81           C  
ATOM   2912  C   MET A1215      39.186  24.780  12.735  1.00 27.88           C  
ATOM   2913  O   MET A1215      40.011  24.746  11.822  1.00 29.32           O  
ATOM   2914  CB  MET A1215      38.967  22.492  13.703  1.00 22.98           C  
ATOM   2915  CG  MET A1215      38.118  21.246  13.980  1.00 24.75           C  
ATOM   2916  SD  MET A1215      36.680  21.576  15.017  1.00 25.89           S  
ATOM   2917  CE  MET A1215      37.468  22.148  16.520  1.00 25.49           C  
ATOM   2918  N   LYS A1216      39.073  25.806  13.576  1.00 26.25           N  
ATOM   2919  CA  LYS A1216      39.831  27.041  13.412  1.00 31.53           C  
ATOM   2920  C   LYS A1216      40.531  27.385  14.717  1.00 32.11           C  
ATOM   2921  O   LYS A1216      39.877  27.536  15.753  1.00 30.68           O  
ATOM   2922  CB  LYS A1216      38.912  28.195  12.986  1.00 33.13           C  
ATOM   2923  CG  LYS A1216      38.331  28.062  11.578  1.00 30.14           C  
ATOM   2924  CD  LYS A1216      39.442  28.135  10.546  1.00 38.15           C  
ATOM   2925  CE  LYS A1216      38.961  28.741   9.239  1.00 50.75           C  
ATOM   2926  NZ  LYS A1216      37.945  27.894   8.561  1.00 48.39           N  
ATOM   2927  N   SER A1217      41.850  27.531  14.663  1.00 31.31           N  
ATOM   2928  CA  SER A1217      42.611  27.955  15.827  1.00 36.03           C  
ATOM   2929  C   SER A1217      42.650  29.478  15.908  1.00 41.18           C  
ATOM   2930  O   SER A1217      42.236  30.183  14.988  1.00 39.58           O  
ATOM   2931  CB  SER A1217      44.028  27.396  15.774  1.00 36.31           C  
ATOM   2932  OG  SER A1217      44.795  28.088  14.807  1.00 39.58           O  
ATOM   2933  N   GLU A1218      43.170  29.986  17.025  1.00 53.53           N  
ATOM   2934  CA  GLU A1218      43.312  31.431  17.223  1.00 59.25           C  
ATOM   2935  C   GLU A1218      44.257  32.048  16.190  1.00 68.94           C  
ATOM   2936  O   GLU A1218      45.415  32.339  16.485  1.00 66.03           O  
ATOM   2937  CB  GLU A1218      43.811  31.741  18.642  1.00 61.51           C  
ATOM   2938  CG  GLU A1218      42.724  31.721  19.715  1.00 50.75           C  
ATOM   2939  CD  GLU A1218      43.221  32.192  21.078  1.00 55.64           C  
ATOM   2940  OE1 GLU A1218      43.724  31.358  21.866  1.00 58.53           O  
ATOM   2941  OE2 GLU A1218      43.105  33.401  21.367  1.00 53.87           O  
ATOM   2942  N   ASN A1225      38.585  36.278  20.035  1.00 57.88           N  
ATOM   2943  CA  ASN A1225      37.602  35.711  19.113  1.00 52.32           C  
ATOM   2944  C   ASN A1225      37.188  34.300  19.531  1.00 48.78           C  
ATOM   2945  O   ASN A1225      36.133  34.111  20.141  1.00 43.39           O  
ATOM   2946  CB  ASN A1225      38.149  35.687  17.690  1.00 50.93           C  
ATOM   2947  CG  ASN A1225      37.087  35.342  16.674  1.00 51.97           C  
ATOM   2948  OD1 ASN A1225      36.338  36.210  16.224  1.00 60.91           O  
ATOM   2949  ND2 ASN A1225      37.003  34.068  16.316  1.00 52.90           N  
ATOM   2950  N   LYS A1226      38.015  33.317  19.169  1.00 37.73           N  
ATOM   2951  CA  LYS A1226      37.898  31.931  19.622  1.00 41.54           C  
ATOM   2952  C   LYS A1226      36.701  31.182  19.031  1.00 35.21           C  
ATOM   2953  O   LYS A1226      36.229  30.211  19.636  1.00 37.65           O  
ATOM   2954  CB  LYS A1226      37.838  31.848  21.157  1.00 41.23           C  
ATOM   2955  CG  LYS A1226      39.101  32.278  21.887  1.00 40.98           C  
ATOM   2956  CD  LYS A1226      39.341  31.382  23.094  1.00 43.97           C  
ATOM   2957  CE  LYS A1226      40.397  31.952  24.026  1.00 46.00           C  
ATOM   2958  NZ  LYS A1226      41.219  30.882  24.673  1.00 49.53           N  
ATOM   2959  N   CYS A1227      36.191  31.582  17.861  1.00 33.92           N  
ATOM   2960  CA  CYS A1227      35.146  30.807  17.190  1.00 31.64           C  
ATOM   2961  C   CYS A1227      35.825  29.671  16.425  1.00 31.33           C  
ATOM   2962  O   CYS A1227      36.509  29.899  15.425  1.00 32.65           O  
ATOM   2963  CB  CYS A1227      34.289  31.709  16.300  1.00 34.09           C  
ATOM   2964  SG  CYS A1227      33.235  32.871  17.277  1.00 35.13           S  
ATOM   2965  N   LYS A1228      35.646  28.440  16.900  1.00 29.50           N  
ATOM   2966  CA ALYS A1228      36.496  27.334  16.488  0.66 28.69           C  
ATOM   2967  CA BLYS A1228      36.498  27.334  16.486  0.34 28.69           C  
ATOM   2968  C   LYS A1228      35.854  26.369  15.494  1.00 26.00           C  
ATOM   2969  O   LYS A1228      36.569  25.530  14.937  1.00 27.02           O  
ATOM   2970  CB ALYS A1228      36.943  26.533  17.716  0.66 28.38           C  
ATOM   2971  CB BLYS A1228      36.956  26.540  17.716  0.34 28.38           C  
ATOM   2972  CG ALYS A1228      38.014  27.188  18.592  0.66 28.31           C  
ATOM   2973  CG BLYS A1228      37.969  27.250  18.612  0.34 28.32           C  
ATOM   2974  CD ALYS A1228      38.550  26.133  19.549  0.66 29.13           C  
ATOM   2975  CD BLYS A1228      37.868  26.707  20.030  0.34 27.76           C  
ATOM   2976  CE ALYS A1228      39.555  26.688  20.548  0.66 32.27           C  
ATOM   2977  CE BLYS A1228      39.206  26.704  20.761  0.34 30.61           C  
ATOM   2978  NZ ALYS A1228      38.958  27.694  21.451  0.66 23.57           N  
ATOM   2979  NZ BLYS A1228      40.039  25.515  20.397  0.34 21.89           N  
ATOM   2980  N   MET A1229      34.542  26.435  15.267  1.00 24.14           N  
ATOM   2981  CA  MET A1229      33.860  25.383  14.506  1.00 26.06           C  
ATOM   2982  C   MET A1229      32.976  25.968  13.412  1.00 24.24           C  
ATOM   2983  O   MET A1229      31.913  26.515  13.704  1.00 25.60           O  
ATOM   2984  CB  MET A1229      33.025  24.502  15.434  1.00 26.91           C  
ATOM   2985  CG  MET A1229      33.825  23.632  16.385  1.00 25.68           C  
ATOM   2986  SD  MET A1229      32.746  22.739  17.529  1.00 27.33           S  
ATOM   2987  CE  MET A1229      32.257  24.081  18.617  1.00 23.40           C  
ATOM   2988  N   ASN A1230      33.377  25.785  12.150  1.00 25.66           N  
ATOM   2989  CA  ASN A1230      32.645  26.308  10.994  1.00 24.98           C  
ATOM   2990  C   ASN A1230      32.041  25.137  10.218  1.00 25.92           C  
ATOM   2991  O   ASN A1230      32.763  24.383   9.558  1.00 30.69           O  
ATOM   2992  CB  ASN A1230      33.574  27.138  10.109  1.00 29.40           C  
ATOM   2993  CG  ASN A1230      32.849  27.798   8.957  1.00 32.76           C  
ATOM   2994  OD1 ASN A1230      31.636  27.983   8.998  1.00 32.80           O  
ATOM   2995  ND2 ASN A1230      33.594  28.156   7.916  1.00 34.47           N  
ATOM   2996  N   LEU A1231      30.722  24.993  10.292  1.00 23.78           N  
ATOM   2997  CA  LEU A1231      30.032  23.875   9.662  1.00 28.78           C  
ATOM   2998  C   LEU A1231      29.942  24.065   8.151  1.00 28.59           C  
ATOM   2999  O   LEU A1231      29.669  25.165   7.668  1.00 29.13           O  
ATOM   3000  CB  LEU A1231      28.631  23.722  10.249  1.00 24.32           C  
ATOM   3001  CG  LEU A1231      27.832  22.502   9.794  1.00 26.73           C  
ATOM   3002  CD1 LEU A1231      28.552  21.216  10.159  1.00 25.01           C  
ATOM   3003  CD2 LEU A1231      26.445  22.526  10.398  1.00 25.80           C  
ATOM   3004  N   GLN A1232      30.157  22.974   7.413  1.00 32.08           N  
ATOM   3005  CA  GLN A1232      30.163  22.956   5.955  1.00 32.95           C  
ATOM   3006  C   GLN A1232      29.016  22.111   5.430  1.00 32.92           C  
ATOM   3007  O   GLN A1232      28.672  21.088   6.024  1.00 34.25           O  
ATOM   3008  CB  GLN A1232      31.461  22.358   5.418  1.00 36.00           C  
ATOM   3009  CG  GLN A1232      32.716  23.008   5.925  1.00 41.27           C  
ATOM   3010  CD  GLN A1232      33.132  24.197   5.096  1.00 41.92           C  
ATOM   3011  OE1 GLN A1232      33.868  24.059   4.122  1.00 44.95           O  
ATOM   3012  NE2 GLN A1232      32.675  25.378   5.489  1.00 45.31           N  
ATOM   3013  N   ASP A1233      28.446  22.518   4.298  1.00 35.46           N  
ATOM   3014  CA  ASP A1233      27.596  21.595   3.568  1.00 32.63           C  
ATOM   3015  C   ASP A1233      28.469  20.686   2.704  1.00 38.79           C  
ATOM   3016  O   ASP A1233      29.700  20.780   2.693  1.00 36.56           O  
ATOM   3017  CB  ASP A1233      26.538  22.343   2.751  1.00 36.36           C  
ATOM   3018  CG  ASP A1233      27.111  23.142   1.572  1.00 37.06           C  
ATOM   3019  OD1 ASP A1233      28.234  22.891   1.089  1.00 37.75           O  
ATOM   3020  OD2 ASP A1233      26.391  24.038   1.104  1.00 37.45           O  
ATOM   3021  N   ASN A1234      27.834  19.803   1.947  1.00 41.67           N  
ATOM   3022  CA  ASN A1234      28.593  18.814   1.204  1.00 40.66           C  
ATOM   3023  C   ASN A1234      29.060  19.321  -0.155  1.00 38.47           C  
ATOM   3024  O   ASN A1234      29.603  18.543  -0.943  1.00 43.55           O  
ATOM   3025  CB  ASN A1234      27.780  17.529   1.109  1.00 46.27           C  
ATOM   3026  CG  ASN A1234      27.613  16.877   2.478  1.00 50.51           C  
ATOM   3027  OD1 ASN A1234      28.581  16.775   3.242  1.00 46.21           O  
ATOM   3028  ND2 ASN A1234      26.393  16.466   2.806  1.00 47.80           N  
ATOM   3029  N   ASN A1235      28.904  20.615  -0.418  1.00 34.73           N  
ATOM   3030  CA  ASN A1235      29.623  21.313  -1.472  1.00 37.84           C  
ATOM   3031  C   ASN A1235      30.775  22.144  -0.926  1.00 43.05           C  
ATOM   3032  O   ASN A1235      31.327  22.977  -1.652  1.00 47.15           O  
ATOM   3033  CB  ASN A1235      28.669  22.215  -2.258  1.00 39.49           C  
ATOM   3034  CG  ASN A1235      27.640  21.430  -3.043  1.00 39.30           C  
ATOM   3035  OD1 ASN A1235      27.938  20.362  -3.572  1.00 45.07           O  
ATOM   3036  ND2 ASN A1235      26.417  21.947  -3.109  1.00 38.93           N  
ATOM   3037  N   GLY A1236      31.141  21.952   0.341  1.00 42.22           N  
ATOM   3038  CA  GLY A1236      32.172  22.772   0.942  1.00 35.86           C  
ATOM   3039  C   GLY A1236      31.804  24.221   1.159  1.00 36.79           C  
ATOM   3040  O   GLY A1236      32.698  25.037   1.402  1.00 39.56           O  
ATOM   3041  N   ASN A1237      30.522  24.573   1.079  1.00 32.95           N  
ATOM   3042  CA  ASN A1237      30.080  25.927   1.392  1.00 38.64           C  
ATOM   3043  C   ASN A1237      29.804  26.078   2.882  1.00 34.17           C  
ATOM   3044  O   ASN A1237      29.345  25.145   3.545  1.00 33.90           O  
ATOM   3045  CB  ASN A1237      28.815  26.291   0.618  1.00 41.05           C  
ATOM   3046  CG  ASN A1237      29.067  26.474  -0.859  1.00 43.75           C  
ATOM   3047  OD1 ASN A1237      30.105  26.995  -1.270  1.00 45.66           O  
ATOM   3048  ND2 ASN A1237      28.116  26.046  -1.667  1.00 40.28           N  
ATOM   3049  N   ASP A1238      30.046  27.286   3.385  1.00 33.43           N  
ATOM   3050  CA  ASP A1238      29.833  27.598   4.792  1.00 36.38           C  
ATOM   3051  C   ASP A1238      28.352  27.589   5.136  1.00 36.65           C  
ATOM   3052  O   ASP A1238      27.565  28.339   4.551  1.00 37.89           O  
ATOM   3053  CB  ASP A1238      30.423  28.964   5.124  1.00 34.54           C  
ATOM   3054  CG  ASP A1238      31.930  28.964   5.126  1.00 37.81           C  
ATOM   3055  OD1 ASP A1238      32.537  27.873   5.077  1.00 38.32           O  
ATOM   3056  OD2 ASP A1238      32.513  30.066   5.173  1.00 44.48           O  
ATOM   3057  N   ILE A1239      27.977  26.756   6.101  1.00 33.92           N  
ATOM   3058  CA  ILE A1239      26.682  26.901   6.756  1.00 32.23           C  
ATOM   3059  C   ILE A1239      26.764  27.852   7.946  1.00 32.48           C  
ATOM   3060  O   ILE A1239      25.760  28.467   8.320  1.00 37.74           O  
ATOM   3061  CB  ILE A1239      26.153  25.529   7.191  1.00 33.54           C  
ATOM   3062  CG1 ILE A1239      25.998  24.628   5.986  1.00 35.56           C  
ATOM   3063  CG2 ILE A1239      24.815  25.647   7.889  1.00 34.34           C  
ATOM   3064  CD1 ILE A1239      25.326  23.372   6.356  1.00 35.11           C  
ATOM   3065  N   GLY A1240      27.936  27.985   8.554  1.00 29.71           N  
ATOM   3066  CA  GLY A1240      28.125  28.979   9.586  1.00 31.81           C  
ATOM   3067  C   GLY A1240      28.874  28.451  10.787  1.00 28.53           C  
ATOM   3068  O   GLY A1240      28.947  27.238  11.004  1.00 25.02           O  
ATOM   3069  N   PHE A1241      29.435  29.357  11.577  1.00 26.83           N  
ATOM   3070  CA  PHE A1241      30.053  28.943  12.824  1.00 25.66           C  
ATOM   3071  C   PHE A1241      28.994  28.418  13.783  1.00 25.23           C  
ATOM   3072  O   PHE A1241      27.827  28.826  13.753  1.00 25.31           O  
ATOM   3073  CB  PHE A1241      30.835  30.098  13.448  1.00 27.03           C  
ATOM   3074  CG  PHE A1241      32.194  30.289  12.834  1.00 27.49           C  
ATOM   3075  CD1 PHE A1241      33.247  29.468  13.195  1.00 28.42           C  
ATOM   3076  CD2 PHE A1241      32.410  31.262  11.875  1.00 31.88           C  
ATOM   3077  CE1 PHE A1241      34.510  29.627  12.617  1.00 29.67           C  
ATOM   3078  CE2 PHE A1241      33.660  31.426  11.293  1.00 33.26           C  
ATOM   3079  CZ  PHE A1241      34.710  30.608  11.664  1.00 33.71           C  
ATOM   3080  N   ILE A1242      29.407  27.469  14.613  1.00 27.97           N  
ATOM   3081  CA  ILE A1242      28.506  26.868  15.586  1.00 22.38           C  
ATOM   3082  C   ILE A1242      28.415  27.788  16.797  1.00 22.65           C  
ATOM   3083  O   ILE A1242      29.425  28.105  17.433  1.00 26.76           O  
ATOM   3084  CB  ILE A1242      28.981  25.462  15.969  1.00 23.51           C  
ATOM   3085  CG1 ILE A1242      28.898  24.555  14.732  1.00 20.54           C  
ATOM   3086  CG2 ILE A1242      28.159  24.917  17.122  1.00 24.04           C  
ATOM   3087  CD1 ILE A1242      29.275  23.130  14.984  1.00 25.52           C  
ATOM   3088  N   GLY A1243      27.213  28.237  17.086  1.00 22.87           N  
ATOM   3089  CA  GLY A1243      26.953  29.119  18.216  1.00 24.79           C  
ATOM   3090  C   GLY A1243      25.598  28.772  18.772  1.00 24.21           C  
ATOM   3091  O   GLY A1243      25.231  27.591  18.817  1.00 28.05           O  
ATOM   3092  N   PHE A1244      24.832  29.780  19.175  1.00 22.20           N  
ATOM   3093  CA  PHE A1244      23.502  29.511  19.691  1.00 24.42           C  
ATOM   3094  C   PHE A1244      22.599  30.685  19.348  1.00 26.11           C  
ATOM   3095  O   PHE A1244      23.068  31.780  19.026  1.00 27.44           O  
ATOM   3096  CB  PHE A1244      23.521  29.237  21.207  1.00 25.91           C  
ATOM   3097  CG  PHE A1244      23.881  30.435  22.042  1.00 29.37           C  
ATOM   3098  CD1 PHE A1244      25.208  30.709  22.359  1.00 30.42           C  
ATOM   3099  CD2 PHE A1244      22.890  31.288  22.521  1.00 32.20           C  
ATOM   3100  CE1 PHE A1244      25.544  31.824  23.133  1.00 31.16           C  
ATOM   3101  CE2 PHE A1244      23.219  32.405  23.294  1.00 38.68           C  
ATOM   3102  CZ  PHE A1244      24.549  32.669  23.601  1.00 33.93           C  
ATOM   3103  N   HIS A1245      21.292  30.433  19.412  1.00 27.48           N  
ATOM   3104  CA  HIS A1245      20.282  31.414  19.044  1.00 32.22           C  
ATOM   3105  C   HIS A1245      19.014  31.141  19.839  1.00 30.46           C  
ATOM   3106  O   HIS A1245      18.661  29.983  20.065  1.00 28.92           O  
ATOM   3107  CB  HIS A1245      19.976  31.365  17.539  1.00 34.40           C  
ATOM   3108  CG  HIS A1245      19.044  32.442  17.072  1.00 33.71           C  
ATOM   3109  ND1 HIS A1245      19.464  33.730  16.814  1.00 41.50           N  
ATOM   3110  CD2 HIS A1245      17.712  32.424  16.820  1.00 34.78           C  
ATOM   3111  CE1 HIS A1245      18.433  34.458  16.422  1.00 38.53           C  
ATOM   3112  NE2 HIS A1245      17.358  33.690  16.419  1.00 35.80           N  
ATOM   3113  N   GLN A1246      18.328  32.209  20.248  1.00 30.51           N  
ATOM   3114  CA  GLN A1246      17.129  32.089  21.074  1.00 35.61           C  
ATOM   3115  C   GLN A1246      15.913  31.772  20.203  1.00 38.56           C  
ATOM   3116  O   GLN A1246      15.577  32.536  19.292  1.00 41.39           O  
ATOM   3117  CB  GLN A1246      16.887  33.374  21.867  1.00 36.68           C  
ATOM   3118  CG  GLN A1246      18.021  33.778  22.781  1.00 40.58           C  
ATOM   3119  CD  GLN A1246      17.787  33.335  24.207  1.00 48.75           C  
ATOM   3120  OE1 GLN A1246      17.484  32.167  24.456  1.00 43.99           O  
ATOM   3121  NE2 GLN A1246      17.932  34.266  25.152  1.00 59.82           N  
ATOM   3122  N   PHE A1247      15.252  30.652  20.490  1.00 37.75           N  
ATOM   3123  CA  PHE A1247      13.980  30.273  19.873  1.00 36.45           C  
ATOM   3124  C   PHE A1247      12.957  30.099  20.995  1.00 43.96           C  
ATOM   3125  O   PHE A1247      12.963  29.079  21.692  1.00 42.29           O  
ATOM   3126  CB  PHE A1247      14.110  28.995  19.050  1.00 36.43           C  
ATOM   3127  CG  PHE A1247      15.063  29.107  17.889  1.00 38.98           C  
ATOM   3128  CD1 PHE A1247      14.627  29.548  16.650  1.00 42.49           C  
ATOM   3129  CD2 PHE A1247      16.389  28.754  18.034  1.00 32.81           C  
ATOM   3130  CE1 PHE A1247      15.504  29.641  15.579  1.00 41.62           C  
ATOM   3131  CE2 PHE A1247      17.262  28.835  16.975  1.00 34.46           C  
ATOM   3132  CZ  PHE A1247      16.820  29.282  15.743  1.00 37.65           C  
ATOM   3133  N   ASN A1248      12.081  31.090  21.151  1.00 48.04           N  
ATOM   3134  CA  ASN A1248      11.062  31.135  22.203  1.00 53.87           C  
ATOM   3135  C   ASN A1248      11.656  30.783  23.570  1.00 46.83           C  
ATOM   3136  O   ASN A1248      11.245  29.833  24.242  1.00 51.11           O  
ATOM   3137  CB  ASN A1248       9.875  30.229  21.857  1.00 54.22           C  
ATOM   3138  CG  ASN A1248       8.650  30.514  22.724  1.00 61.66           C  
ATOM   3139  OD1 ASN A1248       8.061  29.602  23.310  1.00 58.06           O  
ATOM   3140  ND2 ASN A1248       8.274  31.789  22.821  1.00 62.71           N  
ATOM   3141  N   ASN A1249      12.649  31.578  23.967  1.00 46.61           N  
ATOM   3142  CA  ASN A1249      13.329  31.508  25.258  1.00 49.56           C  
ATOM   3143  C   ASN A1249      14.174  30.253  25.440  1.00 43.20           C  
ATOM   3144  O   ASN A1249      14.630  29.985  26.558  1.00 45.47           O  
ATOM   3145  CB  ASN A1249      12.342  31.629  26.425  1.00 54.50           C  
ATOM   3146  CG  ASN A1249      12.248  33.042  26.956  1.00 65.08           C  
ATOM   3147  OD1 ASN A1249      12.497  34.010  26.230  1.00 64.88           O  
ATOM   3148  ND2 ASN A1249      11.896  33.172  28.231  1.00 70.50           N  
ATOM   3149  N   ILE A1250      14.402  29.478  24.384  1.00 35.87           N  
ATOM   3150  CA  ILE A1250      15.321  28.346  24.413  1.00 36.83           C  
ATOM   3151  C   ILE A1250      16.549  28.715  23.589  1.00 33.60           C  
ATOM   3152  O   ILE A1250      16.435  29.040  22.402  1.00 32.72           O  
ATOM   3153  CB  ILE A1250      14.662  27.067  23.881  1.00 35.48           C  
ATOM   3154  CG1 ILE A1250      13.328  26.829  24.582  1.00 41.94           C  
ATOM   3155  CG2 ILE A1250      15.579  25.879  24.085  1.00 29.34           C  
ATOM   3156  CD1 ILE A1250      12.586  25.625  24.051  1.00 45.05           C  
ATOM   3157  N   ALA A1251      17.722  28.677  24.214  1.00 32.25           N  
ATOM   3158  CA  ALA A1251      18.972  28.971  23.512  1.00 30.20           C  
ATOM   3159  C   ALA A1251      19.451  27.695  22.831  1.00 30.37           C  
ATOM   3160  O   ALA A1251      20.207  26.905  23.403  1.00 29.36           O  
ATOM   3161  CB  ALA A1251      20.013  29.524  24.474  1.00 28.47           C  
ATOM   3162  N   LYS A1252      19.012  27.493  21.588  1.00 28.08           N  
ATOM   3163  CA  LYS A1252      19.342  26.289  20.839  1.00 26.07           C  
ATOM   3164  C   LYS A1252      20.676  26.435  20.115  1.00 24.83           C  
ATOM   3165  O   LYS A1252      21.058  27.529  19.696  1.00 23.06           O  
ATOM   3166  CB  LYS A1252      18.244  25.960  19.825  1.00 27.21           C  
ATOM   3167  CG  LYS A1252      16.886  25.749  20.452  1.00 29.14           C  
ATOM   3168  CD  LYS A1252      15.876  25.283  19.435  1.00 30.79           C  
ATOM   3169  CE  LYS A1252      14.524  25.078  20.077  1.00 32.25           C  
ATOM   3170  NZ  LYS A1252      13.569  24.491  19.103  1.00 33.71           N  
ATOM   3171  N   LEU A1253      21.378  25.311  19.970  1.00 24.32           N  
ATOM   3172  CA  LEU A1253      22.651  25.288  19.256  1.00 25.49           C  
ATOM   3173  C   LEU A1253      22.394  25.403  17.763  1.00 25.64           C  
ATOM   3174  O   LEU A1253      21.565  24.667  17.217  1.00 27.18           O  
ATOM   3175  CB  LEU A1253      23.396  23.986  19.535  1.00 25.58           C  
ATOM   3176  CG  LEU A1253      24.684  23.785  20.331  1.00 35.26           C  
ATOM   3177  CD1 LEU A1253      25.291  22.491  19.855  1.00 34.63           C  
ATOM   3178  CD2 LEU A1253      25.678  24.894  20.180  1.00 30.44           C  
ATOM   3179  N   VAL A1254      23.120  26.302  17.096  1.00 27.39           N  
ATOM   3180  CA  VAL A1254      22.922  26.550  15.672  1.00 27.37           C  
ATOM   3181  C   VAL A1254      24.264  26.718  14.977  1.00 29.70           C  
ATOM   3182  O   VAL A1254      25.260  27.118  15.587  1.00 27.90           O  
ATOM   3183  CB  VAL A1254      22.067  27.806  15.403  1.00 26.89           C  
ATOM   3184  CG1 VAL A1254      20.695  27.683  16.033  1.00 29.43           C  
ATOM   3185  CG2 VAL A1254      22.797  29.056  15.894  1.00 26.62           C  
ATOM   3186  N   ALA A1255      24.273  26.416  13.683  1.00 26.44           N  
ATOM   3187  CA  ALA A1255      25.258  26.946  12.754  1.00 26.38           C  
ATOM   3188  C   ALA A1255      24.621  28.132  12.046  1.00 27.62           C  
ATOM   3189  O   ALA A1255      23.501  28.018  11.539  1.00 30.82           O  
ATOM   3190  CB  ALA A1255      25.696  25.893  11.735  1.00 28.20           C  
ATOM   3191  N   SER A1256      25.319  29.264  12.013  1.00 26.38           N  
ATOM   3192  CA  SER A1256      24.729  30.477  11.459  1.00 30.44           C  
ATOM   3193  C   SER A1256      25.783  31.303  10.744  1.00 33.00           C  
ATOM   3194  O   SER A1256      26.801  31.667  11.340  1.00 31.53           O  
ATOM   3195  CB  SER A1256      24.065  31.318  12.555  1.00 32.32           C  
ATOM   3196  OG  SER A1256      23.830  32.640  12.101  1.00 35.51           O  
ATOM   3197  N   ASN A1257      25.525  31.623   9.475  1.00 35.97           N  
ATOM   3198  CA  ASN A1257      26.461  32.458   8.732  1.00 36.44           C  
ATOM   3199  C   ASN A1257      26.478  33.895   9.226  1.00 33.07           C  
ATOM   3200  O   ASN A1257      27.326  34.672   8.781  1.00 36.67           O  
ATOM   3201  CB  ASN A1257      26.139  32.425   7.240  1.00 38.41           C  
ATOM   3202  CG  ASN A1257      26.892  31.337   6.519  1.00 40.37           C  
ATOM   3203  OD1 ASN A1257      27.990  30.956   6.931  1.00 39.04           O  
ATOM   3204  ND2 ASN A1257      26.317  30.832   5.429  1.00 38.17           N  
ATOM   3205  N   TRP A1258      25.573  34.265  10.130  1.00 37.82           N  
ATOM   3206  CA  TRP A1258      25.672  35.576  10.759  1.00 39.05           C  
ATOM   3207  C   TRP A1258      27.029  35.751  11.425  1.00 39.24           C  
ATOM   3208  O   TRP A1258      27.647  36.815  11.319  1.00 37.65           O  
ATOM   3209  CB  TRP A1258      24.548  35.752  11.774  1.00 39.93           C  
ATOM   3210  CG  TRP A1258      24.537  37.078  12.478  1.00 47.07           C  
ATOM   3211  CD1 TRP A1258      23.883  38.210  12.085  1.00 51.21           C  
ATOM   3212  CD2 TRP A1258      25.193  37.401  13.712  1.00 49.15           C  
ATOM   3213  NE1 TRP A1258      24.093  39.219  12.997  1.00 56.35           N  
ATOM   3214  CE2 TRP A1258      24.893  38.748  14.005  1.00 54.13           C  
ATOM   3215  CE3 TRP A1258      26.003  36.680  14.599  1.00 48.03           C  
ATOM   3216  CZ2 TRP A1258      25.378  39.393  15.144  1.00 52.66           C  
ATOM   3217  CZ3 TRP A1258      26.484  37.323  15.730  1.00 48.97           C  
ATOM   3218  CH2 TRP A1258      26.167  38.665  15.993  1.00 53.41           C  
ATOM   3219  N   TYR A1259      27.518  34.700  12.096  1.00 35.34           N  
ATOM   3220  CA  TYR A1259      28.834  34.758  12.726  1.00 36.38           C  
ATOM   3221  C   TYR A1259      29.928  35.024  11.693  1.00 42.26           C  
ATOM   3222  O   TYR A1259      30.802  35.875  11.902  1.00 37.60           O  
ATOM   3223  CB  TYR A1259      29.119  33.454  13.484  1.00 33.53           C  
ATOM   3224  CG  TYR A1259      28.239  33.200  14.695  1.00 32.53           C  
ATOM   3225  CD1 TYR A1259      28.207  34.093  15.756  1.00 30.53           C  
ATOM   3226  CD2 TYR A1259      27.450  32.057  14.780  1.00 30.62           C  
ATOM   3227  CE1 TYR A1259      27.422  33.868  16.861  1.00 26.09           C  
ATOM   3228  CE2 TYR A1259      26.642  31.828  15.887  1.00 32.66           C  
ATOM   3229  CZ  TYR A1259      26.638  32.741  16.926  1.00 31.19           C  
ATOM   3230  OH  TYR A1259      25.850  32.524  18.033  1.00 32.95           O  
ATOM   3231  N   ASN A1260      29.894  34.303  10.565  1.00 38.17           N  
ATOM   3232  CA  ASN A1260      30.964  34.426   9.576  1.00 39.53           C  
ATOM   3233  C   ASN A1260      31.028  35.826   8.980  1.00 40.08           C  
ATOM   3234  O   ASN A1260      32.112  36.298   8.617  1.00 41.94           O  
ATOM   3235  CB  ASN A1260      30.777  33.399   8.463  1.00 32.32           C  
ATOM   3236  CG  ASN A1260      30.605  31.997   8.994  1.00 36.26           C  
ATOM   3237  OD1 ASN A1260      29.805  31.757   9.897  1.00 34.28           O  
ATOM   3238  ND2 ASN A1260      31.351  31.059   8.432  1.00 34.34           N  
ATOM   3239  N   ARG A1261      29.888  36.497   8.859  1.00 42.71           N  
ATOM   3240  CA  ARG A1261      29.893  37.859   8.344  1.00 47.65           C  
ATOM   3241  C   ARG A1261      30.343  38.869   9.386  1.00 51.15           C  
ATOM   3242  O   ARG A1261      30.792  39.957   9.016  1.00 59.39           O  
ATOM   3243  CB  ARG A1261      28.500  38.229   7.824  1.00 47.59           C  
ATOM   3244  CG  ARG A1261      27.941  37.224   6.828  1.00 49.93           C  
ATOM   3245  CD  ARG A1261      26.719  37.745   6.101  1.00 51.71           C  
ATOM   3246  NE  ARG A1261      25.495  37.077   6.531  1.00 54.58           N  
ATOM   3247  CZ  ARG A1261      25.088  35.890   6.084  1.00 55.10           C  
ATOM   3248  NH1 ARG A1261      25.812  35.221   5.194  1.00 48.48           N  
ATOM   3249  NH2 ARG A1261      23.953  35.366   6.533  1.00 52.19           N  
ATOM   3250  N   GLN A1262      30.272  38.518  10.671  1.00 50.92           N  
ATOM   3251  CA  GLN A1262      30.430  39.471  11.764  1.00 51.79           C  
ATOM   3252  C   GLN A1262      31.782  39.407  12.464  1.00 59.13           C  
ATOM   3253  O   GLN A1262      32.314  40.454  12.844  1.00 59.76           O  
ATOM   3254  CB  GLN A1262      29.320  39.263  12.800  1.00 52.19           C  
ATOM   3255  CG  GLN A1262      28.027  39.983  12.463  1.00 58.89           C  
ATOM   3256  CD  GLN A1262      28.107  41.467  12.768  1.00 65.93           C  
ATOM   3257  OE1 GLN A1262      28.343  41.862  13.911  1.00 68.74           O  
ATOM   3258  NE2 GLN A1262      27.926  42.296  11.745  1.00 69.31           N  
ATOM   3259  N   ILE A1263      32.360  38.216  12.658  1.00 54.43           N  
ATOM   3260  CA  ILE A1263      33.556  38.111  13.494  1.00 61.14           C  
ATOM   3261  C   ILE A1263      34.783  38.755  12.865  1.00 66.15           C  
ATOM   3262  O   ILE A1263      35.822  38.869  13.533  1.00 60.02           O  
ATOM   3263  CB  ILE A1263      33.886  36.645  13.853  1.00 57.32           C  
ATOM   3264  CG1 ILE A1263      34.145  35.817  12.594  1.00 51.56           C  
ATOM   3265  CG2 ILE A1263      32.776  36.032  14.708  1.00 44.95           C  
ATOM   3266  CD1 ILE A1263      34.842  34.509  12.888  1.00 52.64           C  
ATOM   3267  N   GLY A1264      34.694  39.178  11.601  1.00 64.74           N  
ATOM   3268  CA  GLY A1264      35.726  39.982  10.977  1.00 68.35           C  
ATOM   3269  C   GLY A1264      35.544  41.477  11.124  1.00 76.02           C  
ATOM   3270  O   GLY A1264      36.428  42.244  10.726  1.00 78.90           O  
ATOM   3271  N   LYS A1265      34.414  41.908  11.692  1.00 76.76           N  
ATOM   3272  CA  LYS A1265      34.117  43.316  11.932  1.00 76.94           C  
ATOM   3273  C   LYS A1265      34.609  43.782  13.301  1.00 75.80           C  
ATOM   3274  O   LYS A1265      35.302  44.800  13.400  1.00 80.31           O  
ATOM   3275  CB  LYS A1265      32.609  43.565  11.808  1.00 74.83           C  
ATOM   3276  CG  LYS A1265      31.988  43.088  10.502  1.00 72.91           C  
ATOM   3277  CD  LYS A1265      32.253  44.059   9.365  1.00 77.67           C  
ATOM   3278  CE  LYS A1265      33.002  43.386   8.226  1.00 83.22           C  
ATOM   3279  NZ  LYS A1265      33.195  44.310   7.074  1.00 94.91           N  
ATOM   3280  N   ALA A1266      34.257  43.055  14.361  1.00 74.38           N  
ATOM   3281  CA  ALA A1266      34.626  43.398  15.729  1.00 72.99           C  
ATOM   3282  C   ALA A1266      35.543  42.327  16.312  1.00 70.04           C  
ATOM   3283  O   ALA A1266      35.767  41.271  15.713  1.00 72.45           O  
ATOM   3284  CB  ALA A1266      33.381  43.575  16.609  1.00 68.02           C  
ATOM   3285  N   SER A1267      36.072  42.611  17.506  1.00 59.82           N  
ATOM   3286  CA  SER A1267      37.064  41.759  18.153  1.00 61.13           C  
ATOM   3287  C   SER A1267      36.594  41.265  19.521  1.00 59.99           C  
ATOM   3288  O   SER A1267      37.408  41.032  20.417  1.00 65.30           O  
ATOM   3289  CB  SER A1267      38.396  42.500  18.281  1.00 63.79           C  
ATOM   3290  OG  SER A1267      39.438  41.632  18.697  1.00 65.15           O  
ATOM   3291  N   ARG A1268      35.288  41.079  19.692  1.00 48.17           N  
ATOM   3292  CA  ARG A1268      34.719  40.720  20.980  1.00 41.96           C  
ATOM   3293  C   ARG A1268      34.423  39.219  21.049  1.00 42.32           C  
ATOM   3294  O   ARG A1268      34.675  38.455  20.115  1.00 42.97           O  
ATOM   3295  CB  ARG A1268      33.452  41.536  21.243  1.00 43.60           C  
ATOM   3296  CG  ARG A1268      32.384  41.385  20.169  1.00 40.06           C  
ATOM   3297  CD  ARG A1268      31.030  41.824  20.682  1.00 37.82           C  
ATOM   3298  NE  ARG A1268      29.976  41.669  19.680  1.00 41.67           N  
ATOM   3299  CZ  ARG A1268      29.131  40.643  19.623  1.00 40.61           C  
ATOM   3300  NH1 ARG A1268      29.205  39.663  20.515  1.00 37.43           N  
ATOM   3301  NH2 ARG A1268      28.203  40.599  18.673  1.00 44.08           N  
ATOM   3302  N   THR A1269      33.890  38.791  22.188  1.00 34.74           N  
ATOM   3303  CA  THR A1269      33.412  37.424  22.319  1.00 34.88           C  
ATOM   3304  C   THR A1269      32.081  37.289  21.587  1.00 32.96           C  
ATOM   3305  O   THR A1269      31.236  38.191  21.629  1.00 30.95           O  
ATOM   3306  CB  THR A1269      33.253  37.055  23.794  1.00 33.09           C  
ATOM   3307  OG1 THR A1269      34.496  37.263  24.471  1.00 34.97           O  
ATOM   3308  CG2 THR A1269      32.832  35.594  23.955  1.00 25.33           C  
ATOM   3309  N   PHE A1270      31.906  36.175  20.887  1.00 29.24           N  
ATOM   3310  CA  PHE A1270      30.658  35.889  20.200  1.00 26.84           C  
ATOM   3311  C   PHE A1270      30.040  34.617  20.764  1.00 27.06           C  
ATOM   3312  O   PHE A1270      30.678  33.853  21.496  1.00 25.12           O  
ATOM   3313  CB  PHE A1270      30.872  35.755  18.685  1.00 30.04           C  
ATOM   3314  CG  PHE A1270      31.165  37.062  17.996  1.00 32.41           C  
ATOM   3315  CD1 PHE A1270      32.452  37.571  17.969  1.00 35.23           C  
ATOM   3316  CD2 PHE A1270      30.151  37.779  17.382  1.00 35.19           C  
ATOM   3317  CE1 PHE A1270      32.724  38.776  17.335  1.00 44.12           C  
ATOM   3318  CE2 PHE A1270      30.414  38.988  16.747  1.00 41.58           C  
ATOM   3319  CZ  PHE A1270      31.701  39.484  16.725  1.00 44.21           C  
ATOM   3320  N   GLY A1271      28.772  34.398  20.413  1.00 24.70           N  
ATOM   3321  CA  GLY A1271      28.124  33.148  20.762  1.00 25.13           C  
ATOM   3322  C   GLY A1271      28.803  31.925  20.175  1.00 22.79           C  
ATOM   3323  O   GLY A1271      28.528  30.808  20.618  1.00 25.26           O  
ATOM   3324  N   CYS A1272      29.680  32.105  19.186  1.00 23.40           N  
ATOM   3325  CA  CYS A1272      30.415  30.987  18.608  1.00 24.94           C  
ATOM   3326  C   CYS A1272      31.776  30.752  19.259  1.00 22.80           C  
ATOM   3327  O   CYS A1272      32.554  29.942  18.753  1.00 24.94           O  
ATOM   3328  CB  CYS A1272      30.599  31.176  17.101  1.00 26.63           C  
ATOM   3329  SG  CYS A1272      31.320  32.741  16.515  1.00 31.27           S  
ATOM   3330  N   SER A1273      32.077  31.417  20.367  1.00 26.91           N  
ATOM   3331  CA  SER A1273      33.371  31.275  21.023  1.00 26.24           C  
ATOM   3332  C   SER A1273      33.279  30.159  22.058  1.00 23.41           C  
ATOM   3333  O   SER A1273      32.503  30.274  23.009  1.00 19.92           O  
ATOM   3334  CB  SER A1273      33.780  32.588  21.694  1.00 30.60           C  
ATOM   3335  OG  SER A1273      33.561  33.704  20.847  1.00 29.42           O  
ATOM   3336  N   TRP A1274      34.083  29.097  21.882  1.00 19.63           N  
ATOM   3337  CA  TRP A1274      34.049  27.914  22.737  1.00 21.76           C  
ATOM   3338  C   TRP A1274      35.429  27.560  23.271  1.00 21.13           C  
ATOM   3339  O   TRP A1274      36.450  27.837  22.631  1.00 23.94           O  
ATOM   3340  CB  TRP A1274      33.547  26.660  21.991  1.00 21.41           C  
ATOM   3341  CG  TRP A1274      32.191  26.753  21.394  1.00 21.52           C  
ATOM   3342  CD1 TRP A1274      31.878  27.182  20.135  1.00 20.91           C  
ATOM   3343  CD2 TRP A1274      30.955  26.375  22.010  1.00 23.21           C  
ATOM   3344  NE1 TRP A1274      30.520  27.107  19.933  1.00 22.23           N  
ATOM   3345  CE2 TRP A1274      29.928  26.619  21.070  1.00 22.79           C  
ATOM   3346  CE3 TRP A1274      30.612  25.873  23.270  1.00 21.58           C  
ATOM   3347  CZ2 TRP A1274      28.585  26.371  21.349  1.00 22.39           C  
ATOM   3348  CZ3 TRP A1274      29.280  25.622  23.540  1.00 22.24           C  
ATOM   3349  CH2 TRP A1274      28.280  25.876  22.584  1.00 23.82           C  
ATOM   3350  N   GLU A1275      35.437  26.876  24.423  1.00 18.86           N  
ATOM   3351  CA  GLU A1275      36.585  26.136  24.928  1.00 19.05           C  
ATOM   3352  C   GLU A1275      36.197  24.671  25.123  1.00 19.12           C  
ATOM   3353  O   GLU A1275      35.071  24.369  25.532  1.00 17.87           O  
ATOM   3354  CB  GLU A1275      37.088  26.697  26.259  1.00 24.10           C  
ATOM   3355  CG  GLU A1275      37.535  28.148  26.212  1.00 24.31           C  
ATOM   3356  CD  GLU A1275      39.012  28.292  25.946  1.00 25.83           C  
ATOM   3357  OE1 GLU A1275      39.530  29.404  26.142  1.00 33.69           O  
ATOM   3358  OE2 GLU A1275      39.661  27.297  25.550  1.00 29.21           O  
ATOM   3359  N   PHE A1276      37.140  23.776  24.827  1.00 16.58           N  
ATOM   3360  CA  PHE A1276      36.983  22.333  24.995  1.00 17.15           C  
ATOM   3361  C   PHE A1276      37.696  21.907  26.272  1.00 17.11           C  
ATOM   3362  O   PHE A1276      38.924  22.061  26.370  1.00 17.25           O  
ATOM   3363  CB  PHE A1276      37.598  21.568  23.824  1.00 17.65           C  
ATOM   3364  CG  PHE A1276      36.917  21.774  22.505  1.00 19.22           C  
ATOM   3365  CD1 PHE A1276      37.199  22.882  21.724  1.00 24.07           C  
ATOM   3366  CD2 PHE A1276      36.035  20.820  22.022  1.00 21.27           C  
ATOM   3367  CE1 PHE A1276      36.574  23.058  20.491  1.00 26.35           C  
ATOM   3368  CE2 PHE A1276      35.411  20.988  20.793  1.00 27.30           C  
ATOM   3369  CZ  PHE A1276      35.682  22.107  20.032  1.00 21.88           C  
ATOM   3370  N   ILE A1277      36.954  21.326  27.213  1.00 16.41           N  
ATOM   3371  CA  ILE A1277      37.503  21.009  28.536  1.00 16.00           C  
ATOM   3372  C   ILE A1277      37.530  19.502  28.778  1.00 14.65           C  
ATOM   3373  O   ILE A1277      36.487  18.910  29.066  1.00 16.76           O  
ATOM   3374  CB  ILE A1277      36.700  21.674  29.662  1.00 16.21           C  
ATOM   3375  CG1 ILE A1277      36.408  23.147  29.340  1.00 16.47           C  
ATOM   3376  CG2 ILE A1277      37.444  21.495  31.011  1.00 16.43           C  
ATOM   3377  CD1 ILE A1277      35.582  23.852  30.407  1.00 20.97           C  
ATOM   3378  N   PRO A1278      38.688  18.858  28.734  1.00 15.56           N  
ATOM   3379  CA  PRO A1278      38.781  17.463  29.164  1.00 17.80           C  
ATOM   3380  C   PRO A1278      39.003  17.377  30.667  1.00 22.89           C  
ATOM   3381  O   PRO A1278      39.446  18.330  31.310  1.00 17.37           O  
ATOM   3382  CB  PRO A1278      40.007  16.954  28.397  1.00 20.83           C  
ATOM   3383  CG  PRO A1278      40.922  18.195  28.335  1.00 15.65           C  
ATOM   3384  CD  PRO A1278      39.972  19.393  28.247  1.00 15.33           C  
ATOM   3385  N   VAL A1279      38.690  16.204  31.223  1.00 17.75           N  
ATOM   3386  CA  VAL A1279      39.031  15.940  32.618  1.00 18.99           C  
ATOM   3387  C   VAL A1279      40.547  15.894  32.759  1.00 21.36           C  
ATOM   3388  O   VAL A1279      41.227  15.183  32.011  1.00 19.55           O  
ATOM   3389  CB  VAL A1279      38.391  14.626  33.092  1.00 20.75           C  
ATOM   3390  CG1 VAL A1279      38.828  14.317  34.504  1.00 19.48           C  
ATOM   3391  CG2 VAL A1279      36.856  14.714  32.997  1.00 18.98           C  
ATOM   3392  N   ASP A1280      41.086  16.657  33.717  1.00 15.53           N  
ATOM   3393  CA  ASP A1280      42.525  16.774  33.941  1.00 16.19           C  
ATOM   3394  C   ASP A1280      42.822  16.622  35.424  1.00 16.58           C  
ATOM   3395  O   ASP A1280      42.086  17.146  36.262  1.00 17.57           O  
ATOM   3396  CB  ASP A1280      43.061  18.133  33.451  1.00 18.50           C  
ATOM   3397  CG  ASP A1280      44.559  18.292  33.671  1.00 16.53           C  
ATOM   3398  OD1 ASP A1280      45.333  17.819  32.822  1.00 18.77           O  
ATOM   3399  OD2 ASP A1280      44.962  18.919  34.669  1.00 17.18           O  
ATOM   3400  N   ASP A1281      43.910  15.908  35.744  1.00 16.73           N  
ATOM   3401  CA  ASP A1281      44.256  15.628  37.133  1.00 18.18           C  
ATOM   3402  C   ASP A1281      44.446  16.891  37.967  1.00 17.69           C  
ATOM   3403  O   ASP A1281      44.381  16.819  39.191  1.00 18.90           O  
ATOM   3404  CB  ASP A1281      45.553  14.812  37.226  1.00 21.32           C  
ATOM   3405  CG  ASP A1281      45.390  13.379  36.748  1.00 27.75           C  
ATOM   3406  OD1 ASP A1281      44.277  12.829  36.857  1.00 26.38           O  
ATOM   3407  OD2 ASP A1281      46.395  12.811  36.283  1.00 27.82           O  
ATOM   3408  N   GLY A1282      44.719  18.029  37.345  1.00 19.53           N  
ATOM   3409  CA  GLY A1282      44.935  19.222  38.128  1.00 16.08           C  
ATOM   3410  C   GLY A1282      43.681  19.990  38.484  1.00 17.90           C  
ATOM   3411  O   GLY A1282      43.792  21.097  39.021  1.00 16.46           O  
ATOM   3412  N   TRP A1283      42.496  19.448  38.180  1.00 12.96           N  
ATOM   3413  CA  TRP A1283      41.219  20.100  38.475  1.00 15.82           C  
ATOM   3414  C   TRP A1283      40.228  19.013  38.863  1.00 18.39           C  
ATOM   3415  O   TRP A1283      39.747  18.280  37.993  1.00 19.77           O  
ATOM   3416  CB  TRP A1283      40.695  20.899  37.275  1.00 15.39           C  
ATOM   3417  CG  TRP A1283      39.419  21.663  37.538  1.00 17.40           C  
ATOM   3418  CD1 TRP A1283      38.142  21.172  37.527  1.00 17.17           C  
ATOM   3419  CD2 TRP A1283      39.307  23.066  37.838  1.00 16.43           C  
ATOM   3420  NE1 TRP A1283      37.241  22.180  37.814  1.00 16.71           N  
ATOM   3421  CE2 TRP A1283      37.934  23.350  38.015  1.00 17.18           C  
ATOM   3422  CE3 TRP A1283      40.240  24.103  37.984  1.00 17.06           C  
ATOM   3423  CZ2 TRP A1283      37.461  24.638  38.324  1.00 16.73           C  
ATOM   3424  CZ3 TRP A1283      39.769  25.392  38.297  1.00 16.66           C  
ATOM   3425  CH2 TRP A1283      38.393  25.643  38.461  1.00 18.28           C  
ATOM   3426  N   GLY A1284      39.920  18.913  40.152  1.00 20.35           N  
ATOM   3427  CA  GLY A1284      39.059  17.858  40.672  1.00 21.99           C  
ATOM   3428  C   GLY A1284      37.638  18.340  40.907  1.00 20.54           C  
ATOM   3429  O   GLY A1284      37.418  19.448  41.393  1.00 20.58           O  
ATOM   3430  N   GLU A1285      36.670  17.492  40.554  1.00 18.89           N  
ATOM   3431  CA  GLU A1285      35.264  17.759  40.832  1.00 17.17           C  
ATOM   3432  C   GLU A1285      34.578  16.458  41.234  1.00 22.36           C  
ATOM   3433  O   GLU A1285      35.051  15.368  40.922  1.00 22.24           O  
ATOM   3434  CB  GLU A1285      34.527  18.372  39.619  1.00 16.30           C  
ATOM   3435  CG  GLU A1285      35.014  19.754  39.210  1.00 17.49           C  
ATOM   3436  CD  GLU A1285      34.203  20.374  38.076  1.00 18.49           C  
ATOM   3437  OE1 GLU A1285      34.562  21.491  37.665  1.00 19.20           O  
ATOM   3438  OE2 GLU A1285      33.209  19.761  37.609  1.00 17.68           O  
ATOM   3439  N   SER A1286      33.433  16.595  41.909  1.00 23.69           N  
ATOM   3440  CA  SER A1286      32.683  15.436  42.388  1.00 27.06           C  
ATOM   3441  C   SER A1286      31.832  14.795  41.294  1.00 32.18           C  
ATOM   3442  O   SER A1286      31.719  13.566  41.232  1.00 35.37           O  
ATOM   3443  CB  SER A1286      31.788  15.848  43.552  1.00 23.48           C  
ATOM   3444  OG  SER A1286      30.775  16.723  43.089  1.00 31.27           O  
ATOM   3445  N   SER A1287      31.216  15.593  40.432  1.00 28.83           N  
ATOM   3446  CA  SER A1287      30.237  15.088  39.483  1.00 36.62           C  
ATOM   3447  C   SER A1287      30.777  15.216  38.064  1.00 36.55           C  
ATOM   3448  O   SER A1287      31.482  16.177  37.743  1.00 29.53           O  
ATOM   3449  CB  SER A1287      28.908  15.842  39.630  1.00 37.76           C  
ATOM   3450  OG  SER A1287      27.907  15.270  38.804  1.00 47.99           O  
ATOM   3451  N   LEU A1288      30.469  14.229  37.227  1.00 36.29           N  
ATOM   3452  CA  LEU A1288      30.821  14.289  35.808  1.00 34.08           C  
ATOM   3453  C   LEU A1288      29.573  14.573  34.956  1.00 42.13           C  
ATOM   3454  O   LEU A1288      29.641  14.627  33.717  1.00 36.29           O  
ATOM   3455  CB  LEU A1288      31.487  12.984  35.356  1.00 33.26           C  
ATOM   3456  CG  LEU A1288      32.903  12.677  35.857  1.00 33.88           C  
ATOM   3457  CD1 LEU A1288      33.387  11.344  35.306  1.00 40.39           C  
ATOM   3458  CD2 LEU A1288      33.854  13.771  35.454  1.00 32.69           C  
TER    3459      LEU A1288                                                      
ATOM   3460  N   LYS B 862      21.095 -15.952  73.415  1.00 49.92           N  
ATOM   3461  CA  LYS B 862      19.860 -15.176  73.327  1.00 43.27           C  
ATOM   3462  C   LYS B 862      19.473 -14.895  71.878  1.00 47.58           C  
ATOM   3463  O   LYS B 862      20.244 -15.165  70.953  1.00 44.38           O  
ATOM   3464  CB  LYS B 862      19.995 -13.856  74.090  1.00 50.96           C  
ATOM   3465  N   TYR B 863      18.262 -14.366  71.695  1.00 38.91           N  
ATOM   3466  CA  TYR B 863      17.750 -13.927  70.399  1.00 40.94           C  
ATOM   3467  C   TYR B 863      17.690 -15.050  69.364  1.00 40.49           C  
ATOM   3468  O   TYR B 863      17.677 -14.768  68.159  1.00 35.82           O  
ATOM   3469  CB  TYR B 863      18.583 -12.769  69.833  1.00 41.47           C  
ATOM   3470  CG  TYR B 863      18.730 -11.583  70.749  1.00 38.30           C  
ATOM   3471  CD1 TYR B 863      17.758 -11.288  71.701  1.00 43.88           C  
ATOM   3472  CD2 TYR B 863      19.842 -10.750  70.662  1.00 37.78           C  
ATOM   3473  CE1 TYR B 863      17.892 -10.195  72.549  1.00 45.45           C  
ATOM   3474  CE2 TYR B 863      19.986  -9.648  71.503  1.00 40.26           C  
ATOM   3475  CZ  TYR B 863      19.009  -9.378  72.446  1.00 44.94           C  
ATOM   3476  OH  TYR B 863      19.140  -8.293  73.288  1.00 47.73           O  
ATOM   3477  N   ASN B 864      17.672 -16.318  69.790  1.00 32.41           N  
ATOM   3478  CA  ASN B 864      17.629 -17.442  68.857  1.00 26.38           C  
ATOM   3479  C   ASN B 864      18.879 -17.495  67.973  1.00 23.62           C  
ATOM   3480  O   ASN B 864      18.797 -17.680  66.760  1.00 25.76           O  
ATOM   3481  CB  ASN B 864      16.374 -17.370  67.987  1.00 32.28           C  
ATOM   3482  CG  ASN B 864      15.111 -17.652  68.752  1.00 37.57           C  
ATOM   3483  OD1 ASN B 864      14.888 -17.113  69.835  1.00 41.98           O  
ATOM   3484  ND2 ASN B 864      14.268 -18.502  68.185  1.00 40.34           N  
ATOM   3485  N   CYS B 865      20.043 -17.357  68.591  1.00 24.92           N  
ATOM   3486  CA  CYS B 865      21.304 -17.338  67.856  1.00 23.93           C  
ATOM   3487  C   CYS B 865      21.687 -18.747  67.416  1.00 25.87           C  
ATOM   3488  O   CYS B 865      21.755 -19.661  68.244  1.00 26.37           O  
ATOM   3489  CB  CYS B 865      22.393 -16.743  68.739  1.00 27.17           C  
ATOM   3490  SG  CYS B 865      24.009 -16.632  67.991  1.00 27.85           S  
ATOM   3491  N   ILE B 866      21.955 -18.927  66.119  1.00 21.59           N  
ATOM   3492  CA  ILE B 866      22.350 -20.234  65.584  1.00 20.15           C  
ATOM   3493  C   ILE B 866      23.773 -20.255  65.044  1.00 23.09           C  
ATOM   3494  O   ILE B 866      24.213 -21.300  64.538  1.00 23.79           O  
ATOM   3495  CB  ILE B 866      21.370 -20.723  64.504  1.00 20.56           C  
ATOM   3496  CG1 ILE B 866      21.244 -19.671  63.385  1.00 22.97           C  
ATOM   3497  CG2 ILE B 866      20.030 -21.051  65.137  1.00 22.23           C  
ATOM   3498  CD1 ILE B 866      20.543 -20.196  62.134  1.00 23.34           C  
ATOM   3499  N   LEU B 867      24.502 -19.142  65.127  1.00 20.02           N  
ATOM   3500  CA  LEU B 867      25.921 -19.097  64.785  1.00 21.13           C  
ATOM   3501  C   LEU B 867      26.479 -17.817  65.387  1.00 20.18           C  
ATOM   3502  O   LEU B 867      25.864 -16.753  65.246  1.00 19.18           O  
ATOM   3503  CB  LEU B 867      26.141 -19.132  63.269  1.00 20.68           C  
ATOM   3504  CG  LEU B 867      27.581 -18.943  62.784  1.00 18.46           C  
ATOM   3505  CD1 LEU B 867      28.496 -20.099  63.270  1.00 18.78           C  
ATOM   3506  CD2 LEU B 867      27.644 -18.792  61.272  1.00 16.97           C  
ATOM   3507  N   ASN B 868      27.610 -17.928  66.088  1.00 18.07           N  
ATOM   3508  CA  ASN B 868      28.198 -16.787  66.802  1.00 25.33           C  
ATOM   3509  C   ASN B 868      29.712 -16.941  66.689  1.00 25.57           C  
ATOM   3510  O   ASN B 868      30.315 -17.687  67.464  1.00 21.74           O  
ATOM   3511  CB  ASN B 868      27.736 -16.749  68.258  1.00 25.97           C  
ATOM   3512  CG  ASN B 868      28.173 -15.486  69.010  1.00 29.26           C  
ATOM   3513  OD1 ASN B 868      29.092 -14.783  68.612  1.00 32.53           O  
ATOM   3514  ND2 ASN B 868      27.493 -15.203  70.110  1.00 38.14           N  
ATOM   3515  N   ILE B 869      30.311 -16.260  65.713  1.00 18.65           N  
ATOM   3516  CA  ILE B 869      31.735 -16.420  65.447  1.00 22.77           C  
ATOM   3517  C   ILE B 869      32.517 -15.507  66.384  1.00 26.49           C  
ATOM   3518  O   ILE B 869      32.386 -14.280  66.318  1.00 22.67           O  
ATOM   3519  CB  ILE B 869      32.064 -16.125  63.978  1.00 21.49           C  
ATOM   3520  CG1 ILE B 869      31.292 -17.070  63.062  1.00 21.63           C  
ATOM   3521  CG2 ILE B 869      33.553 -16.292  63.736  1.00 23.09           C  
ATOM   3522  CD1 ILE B 869      31.707 -16.998  61.604  1.00 21.47           C  
ATOM   3523  N   LYS B 870      33.329 -16.107  67.265  1.00 22.65           N  
ATOM   3524  CA  LYS B 870      34.082 -15.381  68.281  1.00 22.11           C  
ATOM   3525  C   LYS B 870      35.468 -15.989  68.459  1.00 23.56           C  
ATOM   3526  O   LYS B 870      35.621 -17.213  68.450  1.00 21.70           O  
ATOM   3527  CB  LYS B 870      33.373 -15.406  69.643  1.00 28.68           C  
ATOM   3528  CG  LYS B 870      32.181 -14.477  69.775  1.00 42.39           C  
ATOM   3529  CD  LYS B 870      31.612 -14.512  71.190  1.00 49.62           C  
ATOM   3530  CE  LYS B 870      32.452 -13.700  72.165  1.00 49.76           C  
ATOM   3531  NZ  LYS B 870      32.359 -12.234  71.885  1.00 53.78           N  
ATOM   3532  N   TYR B 871      36.468 -15.132  68.649  1.00 24.56           N  
ATOM   3533  CA  TYR B 871      37.791 -15.619  69.019  1.00 24.41           C  
ATOM   3534  C   TYR B 871      37.741 -16.277  70.392  1.00 23.33           C  
ATOM   3535  O   TYR B 871      37.138 -15.741  71.328  1.00 24.60           O  
ATOM   3536  CB  TYR B 871      38.816 -14.481  69.027  1.00 25.83           C  
ATOM   3537  CG  TYR B 871      40.180 -14.942  69.506  1.00 25.40           C  
ATOM   3538  CD1 TYR B 871      41.016 -15.670  68.671  1.00 26.40           C  
ATOM   3539  CD2 TYR B 871      40.617 -14.669  70.794  1.00 27.89           C  
ATOM   3540  CE1 TYR B 871      42.262 -16.102  69.102  1.00 30.25           C  
ATOM   3541  CE2 TYR B 871      41.852 -15.102  71.237  1.00 27.54           C  
ATOM   3542  CZ  TYR B 871      42.667 -15.819  70.392  1.00 29.30           C  
ATOM   3543  OH  TYR B 871      43.904 -16.251  70.832  1.00 35.63           O  
ATOM   3544  N   GLU B 872      38.382 -17.439  70.505  1.00 26.19           N  
ATOM   3545  CA  GLU B 872      38.500 -18.174  71.757  1.00 26.47           C  
ATOM   3546  C   GLU B 872      39.975 -18.322  72.108  1.00 28.76           C  
ATOM   3547  O   GLU B 872      40.760 -18.830  71.302  1.00 26.48           O  
ATOM   3548  CB  GLU B 872      37.841 -19.553  71.647  1.00 25.41           C  
ATOM   3549  CG  GLU B 872      37.854 -20.333  72.941  1.00 32.87           C  
ATOM   3550  CD  GLU B 872      37.538 -21.792  72.733  1.00 31.36           C  
ATOM   3551  OE1 GLU B 872      36.343 -22.137  72.680  1.00 36.00           O  
ATOM   3552  OE2 GLU B 872      38.489 -22.587  72.592  1.00 33.93           O  
ATOM   3553  N   MET B 873      40.356 -17.881  73.304  1.00 27.29           N  
ATOM   3554  CA  MET B 873      41.774 -17.926  73.635  1.00 33.41           C  
ATOM   3555  C   MET B 873      42.274 -19.361  73.789  1.00 30.69           C  
ATOM   3556  O   MET B 873      43.385 -19.682  73.352  1.00 32.57           O  
ATOM   3557  CB  MET B 873      42.063 -17.113  74.891  1.00 38.61           C  
ATOM   3558  CG  MET B 873      43.528 -16.717  74.956  1.00 46.67           C  
ATOM   3559  SD  MET B 873      43.907 -15.669  76.349  1.00 59.15           S  
ATOM   3560  CE  MET B 873      42.678 -14.382  76.117  1.00 53.53           C  
ATOM   3561  N   ASP B 874      41.463 -20.244  74.374  1.00 33.65           N  
ATOM   3562  CA  ASP B 874      41.909 -21.615  74.611  1.00 34.58           C  
ATOM   3563  C   ASP B 874      42.367 -22.276  73.316  1.00 37.28           C  
ATOM   3564  O   ASP B 874      43.535 -22.648  73.173  1.00 37.35           O  
ATOM   3565  CB  ASP B 874      40.800 -22.430  75.276  1.00 34.08           C  
ATOM   3566  CG  ASP B 874      41.253 -23.845  75.636  1.00 45.48           C  
ATOM   3567  OD1 ASP B 874      42.476 -24.062  75.787  1.00 53.58           O  
ATOM   3568  OD2 ASP B 874      40.392 -24.740  75.766  1.00 47.60           O  
ATOM   3569  N   ARG B 875      41.462 -22.413  72.345  1.00 34.28           N  
ATOM   3570  CA  ARG B 875      41.851 -22.980  71.060  1.00 28.82           C  
ATOM   3571  C   ARG B 875      42.597 -21.987  70.178  1.00 29.05           C  
ATOM   3572  O   ARG B 875      43.113 -22.387  69.127  1.00 33.17           O  
ATOM   3573  CB  ARG B 875      40.613 -23.517  70.333  1.00 32.61           C  
ATOM   3574  CG  ARG B 875      40.156 -24.893  70.839  1.00 28.62           C  
ATOM   3575  CD  ARG B 875      38.864 -25.331  70.176  1.00 29.63           C  
ATOM   3576  NE  ARG B 875      37.722 -24.600  70.710  1.00 31.86           N  
ATOM   3577  CZ  ARG B 875      36.466 -24.769  70.308  1.00 29.27           C  
ATOM   3578  NH1 ARG B 875      35.495 -24.059  70.858  1.00 29.85           N  
ATOM   3579  NH2 ARG B 875      36.187 -25.638  69.346  1.00 28.61           N  
ATOM   3580  N   ASP B 876      42.677 -20.717  70.589  1.00 27.92           N  
ATOM   3581  CA  ASP B 876      43.450 -19.693  69.885  1.00 29.39           C  
ATOM   3582  C   ASP B 876      42.999 -19.560  68.427  1.00 29.89           C  
ATOM   3583  O   ASP B 876      43.806 -19.578  67.495  1.00 30.13           O  
ATOM   3584  CB  ASP B 876      44.954 -19.985  69.982  1.00 32.56           C  
ATOM   3585  CG  ASP B 876      45.802 -18.862  69.430  1.00 30.42           C  
ATOM   3586  OD1 ASP B 876      45.361 -17.694  69.490  1.00 37.49           O  
ATOM   3587  OD2 ASP B 876      46.911 -19.145  68.943  1.00 43.19           O  
ATOM   3588  N   LYS B 877      41.685 -19.447  68.232  1.00 29.98           N  
ATOM   3589  CA  LYS B 877      41.136 -19.273  66.892  1.00 29.79           C  
ATOM   3590  C   LYS B 877      39.689 -18.818  67.007  1.00 26.78           C  
ATOM   3591  O   LYS B 877      39.091 -18.826  68.087  1.00 21.23           O  
ATOM   3592  CB  LYS B 877      41.229 -20.555  66.052  1.00 30.30           C  
ATOM   3593  CG  LYS B 877      40.341 -21.709  66.533  1.00 27.17           C  
ATOM   3594  CD  LYS B 877      40.488 -22.959  65.654  1.00 31.82           C  
ATOM   3595  CE  LYS B 877      39.883 -22.788  64.238  1.00 32.68           C  
ATOM   3596  NZ  LYS B 877      38.377 -22.928  64.199  1.00 27.94           N  
ATOM   3597  N   LEU B 878      39.144 -18.401  65.870  1.00 25.26           N  
ATOM   3598  CA  LEU B 878      37.716 -18.137  65.775  1.00 25.13           C  
ATOM   3599  C   LEU B 878      36.949 -19.450  65.883  1.00 19.88           C  
ATOM   3600  O   LEU B 878      37.267 -20.418  65.191  1.00 23.79           O  
ATOM   3601  CB  LEU B 878      37.391 -17.462  64.445  1.00 24.67           C  
ATOM   3602  CG  LEU B 878      38.040 -16.111  64.167  1.00 26.32           C  
ATOM   3603  CD1 LEU B 878      37.641 -15.639  62.777  1.00 29.28           C  
ATOM   3604  CD2 LEU B 878      37.601 -15.122  65.218  1.00 22.33           C  
ATOM   3605  N   VAL B 879      35.922 -19.471  66.734  1.00 24.10           N  
ATOM   3606  CA  VAL B 879      35.067 -20.635  66.919  1.00 20.50           C  
ATOM   3607  C   VAL B 879      33.612 -20.190  66.856  1.00 20.58           C  
ATOM   3608  O   VAL B 879      33.298 -19.004  66.919  1.00 23.69           O  
ATOM   3609  CB  VAL B 879      35.342 -21.348  68.255  1.00 21.60           C  
ATOM   3610  CG1 VAL B 879      36.807 -21.751  68.337  1.00 20.63           C  
ATOM   3611  CG2 VAL B 879      34.966 -20.447  69.413  1.00 23.06           C  
ATOM   3612  N   ASP B 880      32.723 -21.167  66.742  1.00 21.38           N  
ATOM   3613  CA  ASP B 880      31.295 -20.927  66.897  1.00 18.64           C  
ATOM   3614  C   ASP B 880      30.961 -21.036  68.377  1.00 24.64           C  
ATOM   3615  O   ASP B 880      31.066 -22.116  68.968  1.00 24.02           O  
ATOM   3616  CB  ASP B 880      30.487 -21.912  66.058  1.00 20.25           C  
ATOM   3617  CG  ASP B 880      28.987 -21.810  66.302  1.00 19.38           C  
ATOM   3618  OD1 ASP B 880      28.496 -20.757  66.779  1.00 19.94           O  
ATOM   3619  OD2 ASP B 880      28.294 -22.800  66.008  1.00 23.72           O  
ATOM   3620  N   SER B 881      30.549 -19.923  68.972  1.00 21.93           N  
ATOM   3621  CA  SER B 881      30.160 -19.872  70.377  1.00 25.55           C  
ATOM   3622  C   SER B 881      28.667 -20.050  70.601  1.00 23.83           C  
ATOM   3623  O   SER B 881      28.204 -19.862  71.732  1.00 25.16           O  
ATOM   3624  CB  SER B 881      30.593 -18.540  70.999  1.00 29.79           C  
ATOM   3625  OG  SER B 881      31.996 -18.515  71.158  1.00 46.06           O  
ATOM   3626  N   SER B 882      27.897 -20.391  69.565  1.00 21.91           N  
ATOM   3627  CA  SER B 882      26.446 -20.403  69.711  1.00 21.57           C  
ATOM   3628  C   SER B 882      25.936 -21.598  70.503  1.00 25.13           C  
ATOM   3629  O   SER B 882      24.810 -21.553  71.000  1.00 26.89           O  
ATOM   3630  CB  SER B 882      25.759 -20.410  68.346  1.00 22.05           C  
ATOM   3631  OG  SER B 882      25.981 -21.631  67.667  1.00 21.86           O  
ATOM   3632  N   GLY B 883      26.723 -22.657  70.619  1.00 29.91           N  
ATOM   3633  CA  GLY B 883      26.251 -23.927  71.121  1.00 31.78           C  
ATOM   3634  C   GLY B 883      26.090 -24.980  70.049  1.00 28.52           C  
ATOM   3635  O   GLY B 883      26.066 -26.176  70.373  1.00 28.65           O  
ATOM   3636  N   TYR B 884      25.993 -24.578  68.778  1.00 24.64           N  
ATOM   3637  CA  TYR B 884      25.758 -25.524  67.692  1.00 23.75           C  
ATOM   3638  C   TYR B 884      27.031 -26.137  67.119  1.00 25.21           C  
ATOM   3639  O   TYR B 884      26.930 -27.055  66.299  1.00 23.14           O  
ATOM   3640  CB  TYR B 884      24.961 -24.846  66.565  1.00 22.23           C  
ATOM   3641  CG  TYR B 884      23.521 -24.632  66.943  1.00 22.54           C  
ATOM   3642  CD1 TYR B 884      22.586 -25.645  66.778  1.00 27.45           C  
ATOM   3643  CD2 TYR B 884      23.101 -23.439  67.506  1.00 26.60           C  
ATOM   3644  CE1 TYR B 884      21.271 -25.465  67.132  1.00 27.08           C  
ATOM   3645  CE2 TYR B 884      21.777 -23.246  67.865  1.00 29.49           C  
ATOM   3646  CZ  TYR B 884      20.869 -24.266  67.680  1.00 32.30           C  
ATOM   3647  OH  TYR B 884      19.549 -24.083  68.033  1.00 32.26           O  
ATOM   3648  N   ARG B 885      28.206 -25.641  67.511  1.00 21.69           N  
ATOM   3649  CA  ARG B 885      29.504 -26.223  67.137  1.00 26.37           C  
ATOM   3650  C   ARG B 885      29.689 -26.369  65.620  1.00 28.54           C  
ATOM   3651  O   ARG B 885      30.223 -27.370  65.131  1.00 21.37           O  
ATOM   3652  CB  ARG B 885      29.719 -27.569  67.839  1.00 25.67           C  
ATOM   3653  CG  ARG B 885      29.742 -27.451  69.360  1.00 32.82           C  
ATOM   3654  CD  ARG B 885      29.996 -28.801  70.041  1.00 40.83           C  
ATOM   3655  NE  ARG B 885      29.844 -28.682  71.488  1.00 51.98           N  
ATOM   3656  CZ  ARG B 885      28.944 -29.350  72.206  1.00 58.05           C  
ATOM   3657  NH1 ARG B 885      28.115 -30.197  71.611  1.00 53.29           N  
ATOM   3658  NH2 ARG B 885      28.875 -29.173  73.522  1.00 61.76           N  
ATOM   3659  N   SER B 886      29.269 -25.361  64.861  1.00 21.20           N  
ATOM   3660  CA  SER B 886      29.657 -25.309  63.460  1.00 18.13           C  
ATOM   3661  C   SER B 886      31.167 -25.127  63.354  1.00 20.30           C  
ATOM   3662  O   SER B 886      31.760 -24.308  64.058  1.00 23.62           O  
ATOM   3663  CB  SER B 886      28.940 -24.160  62.738  1.00 20.54           C  
ATOM   3664  OG  SER B 886      27.547 -24.402  62.678  1.00 20.76           O  
ATOM   3665  N   ARG B 887      31.787 -25.884  62.457  1.00 20.11           N  
ATOM   3666  CA  ARG B 887      33.229 -25.817  62.269  1.00 21.06           C  
ATOM   3667  C   ARG B 887      33.617 -24.576  61.474  1.00 23.42           C  
ATOM   3668  O   ARG B 887      32.994 -24.254  60.461  1.00 24.45           O  
ATOM   3669  CB  ARG B 887      33.713 -27.068  61.542  1.00 22.45           C  
ATOM   3670  CG  ARG B 887      35.224 -27.146  61.328  1.00 32.77           C  
ATOM   3671  CD  ARG B 887      35.621 -28.490  60.714  1.00 39.86           C  
ATOM   3672  NE  ARG B 887      37.034 -28.534  60.339  1.00 50.82           N  
ATOM   3673  CZ  ARG B 887      38.017 -28.929  61.147  1.00 59.29           C  
ATOM   3674  NH1 ARG B 887      37.750 -29.320  62.390  1.00 56.70           N  
ATOM   3675  NH2 ARG B 887      39.273 -28.933  60.711  1.00 60.38           N  
ATOM   3676  N   ILE B 888      34.679 -23.905  61.909  1.00 23.29           N  
ATOM   3677  CA  ILE B 888      35.188 -22.708  61.239  1.00 21.67           C  
ATOM   3678  C   ILE B 888      36.602 -22.993  60.743  1.00 26.41           C  
ATOM   3679  O   ILE B 888      37.514 -23.222  61.549  1.00 27.07           O  
ATOM   3680  CB  ILE B 888      35.164 -21.492  62.174  1.00 22.50           C  
ATOM   3681  CG1 ILE B 888      33.738 -21.263  62.678  1.00 23.75           C  
ATOM   3682  CG2 ILE B 888      35.680 -20.236  61.446  1.00 23.40           C  
ATOM   3683  CD1 ILE B 888      33.588 -20.027  63.475  1.00 28.46           C  
ATOM   3684  N   ASN B 889      36.786 -22.971  59.424  1.00 22.31           N  
ATOM   3685  CA  ASN B 889      38.075 -23.240  58.793  1.00 21.46           C  
ATOM   3686  C   ASN B 889      38.668 -21.929  58.298  1.00 25.08           C  
ATOM   3687  O   ASN B 889      38.080 -21.268  57.435  1.00 24.18           O  
ATOM   3688  CB  ASN B 889      37.921 -24.217  57.629  1.00 25.88           C  
ATOM   3689  CG  ASN B 889      37.535 -25.621  58.084  1.00 34.50           C  
ATOM   3690  OD1 ASN B 889      37.952 -26.081  59.148  1.00 33.81           O  
ATOM   3691  ND2 ASN B 889      36.748 -26.310  57.266  1.00 29.97           N  
ATOM   3692  N   ILE B 890      39.838 -21.566  58.820  1.00 23.41           N  
ATOM   3693  CA  ILE B 890      40.456 -20.264  58.572  1.00 23.47           C  
ATOM   3694  C   ILE B 890      41.633 -20.424  57.619  1.00 30.95           C  
ATOM   3695  O   ILE B 890      42.590 -21.147  57.920  1.00 24.79           O  
ATOM   3696  CB  ILE B 890      40.896 -19.609  59.888  1.00 24.90           C  
ATOM   3697  CG1 ILE B 890      39.706 -19.645  60.840  1.00 31.32           C  
ATOM   3698  CG2 ILE B 890      41.455 -18.214  59.656  1.00 24.98           C  
ATOM   3699  CD1 ILE B 890      39.759 -18.677  61.920  1.00 37.73           C  
ATOM   3700  N   GLY B 891      41.574 -19.734  56.482  1.00 22.79           N  
ATOM   3701  CA  GLY B 891      42.638 -19.840  55.506  1.00 21.59           C  
ATOM   3702  C   GLY B 891      43.919 -19.172  55.974  1.00 23.15           C  
ATOM   3703  O   GLY B 891      43.922 -18.277  56.811  1.00 24.09           O  
ATOM   3704  N   THR B 892      45.041 -19.613  55.405  1.00 26.65           N  
ATOM   3705  CA  THR B 892      46.323 -19.047  55.810  1.00 28.46           C  
ATOM   3706  C   THR B 892      46.490 -17.592  55.393  1.00 30.17           C  
ATOM   3707  O   THR B 892      47.406 -16.931  55.889  1.00 29.38           O  
ATOM   3708  CB  THR B 892      47.481 -19.867  55.235  1.00 29.16           C  
ATOM   3709  OG1 THR B 892      47.330 -19.981  53.821  1.00 31.90           O  
ATOM   3710  CG2 THR B 892      47.512 -21.254  55.848  1.00 31.41           C  
ATOM   3711  N   GLY B 893      45.638 -17.079  54.511  1.00 27.78           N  
ATOM   3712  CA  GLY B 893      45.730 -15.713  54.055  1.00 24.99           C  
ATOM   3713  C   GLY B 893      44.955 -14.715  54.872  1.00 24.80           C  
ATOM   3714  O   GLY B 893      44.959 -13.527  54.544  1.00 26.55           O  
ATOM   3715  N   VAL B 894      44.277 -15.165  55.922  1.00 24.04           N  
ATOM   3716  CA  VAL B 894      43.536 -14.275  56.808  1.00 27.19           C  
ATOM   3717  C   VAL B 894      44.512 -13.619  57.770  1.00 32.26           C  
ATOM   3718  O   VAL B 894      45.375 -14.293  58.346  1.00 27.03           O  
ATOM   3719  CB  VAL B 894      42.449 -15.050  57.568  1.00 21.93           C  
ATOM   3720  CG1 VAL B 894      41.700 -14.137  58.537  1.00 26.48           C  
ATOM   3721  CG2 VAL B 894      41.491 -15.704  56.587  1.00 21.11           C  
ATOM   3722  N   LYS B 895      44.378 -12.307  57.952  1.00 23.50           N  
ATOM   3723  CA  LYS B 895      45.183 -11.572  58.916  1.00 23.63           C  
ATOM   3724  C   LYS B 895      44.315 -11.088  60.068  1.00 28.13           C  
ATOM   3725  O   LYS B 895      43.105 -10.904  59.921  1.00 25.96           O  
ATOM   3726  CB  LYS B 895      45.897 -10.401  58.251  1.00 27.14           C  
ATOM   3727  CG  LYS B 895      46.628 -10.829  56.996  1.00 32.85           C  
ATOM   3728  CD  LYS B 895      47.877 -10.022  56.774  1.00 41.53           C  
ATOM   3729  CE  LYS B 895      47.537  -8.602  56.406  1.00 49.59           C  
ATOM   3730  NZ  LYS B 895      46.981  -8.507  55.017  1.00 54.37           N  
ATOM   3731  N   PHE B 896      44.942 -10.892  61.225  1.00 27.18           N  
ATOM   3732  CA  PHE B 896      44.227 -10.559  62.444  1.00 25.31           C  
ATOM   3733  C   PHE B 896      44.820  -9.308  63.065  1.00 27.84           C  
ATOM   3734  O   PHE B 896      45.992  -8.993  62.862  1.00 34.13           O  
ATOM   3735  CB  PHE B 896      44.290 -11.700  63.469  1.00 28.76           C  
ATOM   3736  CG  PHE B 896      43.646 -12.974  63.007  1.00 32.36           C  
ATOM   3737  CD1 PHE B 896      44.341 -13.865  62.206  1.00 39.02           C  
ATOM   3738  CD2 PHE B 896      42.357 -13.292  63.391  1.00 36.81           C  
ATOM   3739  CE1 PHE B 896      43.759 -15.038  61.780  1.00 34.08           C  
ATOM   3740  CE2 PHE B 896      41.762 -14.475  62.971  1.00 42.97           C  
ATOM   3741  CZ  PHE B 896      42.470 -15.348  62.160  1.00 34.07           C  
ATOM   3742  N   SER B 897      44.001  -8.604  63.832  1.00 25.98           N  
ATOM   3743  CA  SER B 897      44.508  -7.547  64.693  1.00 23.98           C  
ATOM   3744  C   SER B 897      45.262  -8.157  65.863  1.00 31.29           C  
ATOM   3745  O   SER B 897      44.841  -9.166  66.428  1.00 27.47           O  
ATOM   3746  CB  SER B 897      43.362  -6.681  65.214  1.00 28.16           C  
ATOM   3747  OG  SER B 897      43.727  -5.959  66.389  1.00 29.86           O  
ATOM   3748  N   GLU B 898      46.377  -7.534  66.240  1.00 30.66           N  
ATOM   3749  CA  GLU B 898      47.065  -7.991  67.438  1.00 34.40           C  
ATOM   3750  C   GLU B 898      46.436  -7.443  68.713  1.00 39.41           C  
ATOM   3751  O   GLU B 898      46.673  -8.003  69.788  1.00 40.40           O  
ATOM   3752  CB  GLU B 898      48.551  -7.633  67.352  1.00 41.63           C  
ATOM   3753  CG  GLU B 898      49.234  -8.347  66.177  1.00 49.79           C  
ATOM   3754  CD  GLU B 898      50.755  -8.239  66.177  1.00 67.46           C  
ATOM   3755  OE1 GLU B 898      51.295  -7.348  65.484  1.00 59.39           O  
ATOM   3756  OE2 GLU B 898      51.410  -9.062  66.855  1.00 67.90           O  
ATOM   3757  N   ILE B 899      45.598  -6.413  68.605  1.00 26.55           N  
ATOM   3758  CA  ILE B 899      44.961  -5.787  69.759  1.00 30.58           C  
ATOM   3759  C   ILE B 899      43.603  -6.414  70.055  1.00 33.19           C  
ATOM   3760  O   ILE B 899      43.224  -6.573  71.216  1.00 35.39           O  
ATOM   3761  CB  ILE B 899      44.830  -4.262  69.525  1.00 32.17           C  
ATOM   3762  CG1 ILE B 899      46.201  -3.599  69.384  1.00 38.52           C  
ATOM   3763  CG2 ILE B 899      44.042  -3.608  70.642  1.00 32.77           C  
ATOM   3764  CD1 ILE B 899      46.711  -3.572  67.968  1.00 41.28           C  
ATOM   3765  N   ASP B 900      42.851  -6.768  69.015  1.00 33.17           N  
ATOM   3766  CA  ASP B 900      41.485  -7.284  69.140  1.00 26.19           C  
ATOM   3767  C   ASP B 900      41.412  -8.468  68.186  1.00 28.05           C  
ATOM   3768  O   ASP B 900      41.271  -8.271  66.980  1.00 25.96           O  
ATOM   3769  CB  ASP B 900      40.474  -6.198  68.781  1.00 34.83           C  
ATOM   3770  CG  ASP B 900      39.027  -6.663  68.870  1.00 34.94           C  
ATOM   3771  OD1 ASP B 900      38.762  -7.876  69.027  1.00 34.86           O  
ATOM   3772  OD2 ASP B 900      38.140  -5.786  68.772  1.00 41.36           O  
ATOM   3773  N   LYS B 901      41.546  -9.689  68.715  1.00 24.09           N  
ATOM   3774  CA  LYS B 901      41.705 -10.850  67.848  1.00 24.91           C  
ATOM   3775  C   LYS B 901      40.402 -11.280  67.187  1.00 20.44           C  
ATOM   3776  O   LYS B 901      40.412 -12.203  66.372  1.00 23.54           O  
ATOM   3777  CB  LYS B 901      42.328 -12.014  68.630  1.00 32.23           C  
ATOM   3778  CG  LYS B 901      43.707 -11.653  69.191  1.00 33.46           C  
ATOM   3779  CD  LYS B 901      44.558 -12.859  69.484  1.00 37.50           C  
ATOM   3780  CE  LYS B 901      45.938 -12.421  69.947  1.00 43.83           C  
ATOM   3781  NZ  LYS B 901      46.826 -13.584  70.232  1.00 49.86           N  
ATOM   3782  N   ASN B 902      39.296 -10.607  67.484  1.00 26.10           N  
ATOM   3783  CA  ASN B 902      38.073 -10.819  66.728  1.00 24.99           C  
ATOM   3784  C   ASN B 902      38.080 -10.111  65.376  1.00 25.25           C  
ATOM   3785  O   ASN B 902      37.322 -10.507  64.483  1.00 26.57           O  
ATOM   3786  CB  ASN B 902      36.875 -10.360  67.559  1.00 24.53           C  
ATOM   3787  CG  ASN B 902      36.481 -11.378  68.610  1.00 25.41           C  
ATOM   3788  OD1 ASN B 902      35.943 -12.426  68.280  1.00 23.50           O  
ATOM   3789  ND2 ASN B 902      36.744 -11.073  69.879  1.00 27.39           N  
ATOM   3790  N   GLN B 903      38.910  -9.080  65.206  1.00 21.69           N  
ATOM   3791  CA  GLN B 903      38.962  -8.315  63.964  1.00 20.90           C  
ATOM   3792  C   GLN B 903      39.830  -9.061  62.963  1.00 23.02           C  
ATOM   3793  O   GLN B 903      41.035  -9.219  63.177  1.00 25.17           O  
ATOM   3794  CB  GLN B 903      39.496  -6.905  64.232  1.00 22.79           C  
ATOM   3795  CG  GLN B 903      38.686  -6.200  65.317  1.00 25.38           C  
ATOM   3796  CD  GLN B 903      38.926  -4.705  65.444  1.00 24.55           C  
ATOM   3797  OE1 GLN B 903      38.194  -4.032  66.163  1.00 32.27           O  
ATOM   3798  NE2 GLN B 903      39.933  -4.185  64.756  1.00 23.73           N  
ATOM   3799  N   VAL B 904      39.229  -9.525  61.873  1.00 19.76           N  
ATOM   3800  CA  VAL B 904      39.957 -10.273  60.862  1.00 19.94           C  
ATOM   3801  C   VAL B 904      39.892  -9.521  59.541  1.00 23.01           C  
ATOM   3802  O   VAL B 904      38.902  -8.849  59.224  1.00 19.79           O  
ATOM   3803  CB  VAL B 904      39.418 -11.714  60.719  1.00 27.61           C  
ATOM   3804  CG1 VAL B 904      39.272 -12.351  62.083  1.00 34.72           C  
ATOM   3805  CG2 VAL B 904      38.086 -11.738  60.029  1.00 24.48           C  
ATOM   3806  N   GLN B 905      40.960  -9.634  58.765  1.00 19.31           N  
ATOM   3807  CA  GLN B 905      41.080  -8.924  57.501  1.00 19.71           C  
ATOM   3808  C   GLN B 905      41.101  -9.914  56.352  1.00 23.12           C  
ATOM   3809  O   GLN B 905      41.916 -10.843  56.334  1.00 22.73           O  
ATOM   3810  CB  GLN B 905      42.336  -8.053  57.465  1.00 22.77           C  
ATOM   3811  CG  GLN B 905      42.411  -7.151  56.224  1.00 22.00           C  
ATOM   3812  CD  GLN B 905      43.806  -6.560  56.016  1.00 32.02           C  
ATOM   3813  OE1 GLN B 905      44.783  -7.295  55.957  1.00 33.09           O  
ATOM   3814  NE2 GLN B 905      43.897  -5.232  55.908  1.00 23.96           N  
ATOM   3815  N   LEU B 906      40.194  -9.720  55.403  1.00 20.69           N  
ATOM   3816  CA  LEU B 906      40.118 -10.541  54.208  1.00 18.22           C  
ATOM   3817  C   LEU B 906      40.600  -9.707  53.036  1.00 22.33           C  
ATOM   3818  O   LEU B 906      40.022  -8.654  52.741  1.00 19.44           O  
ATOM   3819  CB  LEU B 906      38.692 -11.041  53.972  1.00 19.20           C  
ATOM   3820  CG  LEU B 906      38.069 -11.843  55.116  1.00 22.08           C  
ATOM   3821  CD1 LEU B 906      36.625 -12.198  54.762  1.00 21.51           C  
ATOM   3822  CD2 LEU B 906      38.879 -13.100  55.392  1.00 22.44           C  
ATOM   3823  N   SER B 907      41.640 -10.177  52.368  1.00 19.77           N  
ATOM   3824  CA  SER B 907      42.253  -9.457  51.268  1.00 22.09           C  
ATOM   3825  C   SER B 907      41.887 -10.164  49.974  1.00 23.55           C  
ATOM   3826  O   SER B 907      41.168 -11.166  49.968  1.00 24.79           O  
ATOM   3827  CB  SER B 907      43.768  -9.357  51.462  1.00 25.80           C  
ATOM   3828  OG  SER B 907      44.352 -10.643  51.473  1.00 30.09           O  
ATOM   3829  N   ASN B 908      42.378  -9.640  48.862  1.00 20.96           N  
ATOM   3830  CA  ASN B 908      41.990 -10.211  47.574  1.00 24.09           C  
ATOM   3831  C   ASN B 908      42.977 -11.291  47.151  1.00 29.84           C  
ATOM   3832  O   ASN B 908      43.518 -11.276  46.052  1.00 39.92           O  
ATOM   3833  CB  ASN B 908      41.870  -9.111  46.524  1.00 31.16           C  
ATOM   3834  CG  ASN B 908      40.972  -9.502  45.352  1.00 31.28           C  
ATOM   3835  OD1 ASN B 908      40.523 -10.643  45.241  1.00 30.98           O  
ATOM   3836  ND2 ASN B 908      40.713  -8.544  44.468  1.00 30.48           N  
ATOM   3837  N   LEU B 909      43.206 -12.237  48.062  1.00 33.71           N  
ATOM   3838  CA  LEU B 909      44.062 -13.400  47.876  1.00 32.37           C  
ATOM   3839  C   LEU B 909      43.227 -14.663  48.031  1.00 31.13           C  
ATOM   3840  O   LEU B 909      42.306 -14.708  48.844  1.00 23.20           O  
ATOM   3841  CB  LEU B 909      45.188 -13.446  48.905  1.00 32.07           C  
ATOM   3842  CG  LEU B 909      46.262 -12.368  48.926  1.00 40.51           C  
ATOM   3843  CD1 LEU B 909      46.958 -12.420  50.263  1.00 41.43           C  
ATOM   3844  CD2 LEU B 909      47.260 -12.608  47.804  1.00 41.96           C  
ATOM   3845  N   GLU B 910      43.573 -15.703  47.271  1.00 27.97           N  
ATOM   3846  CA  GLU B 910      42.762 -16.917  47.290  1.00 34.86           C  
ATOM   3847  C   GLU B 910      42.742 -17.570  48.670  1.00 27.37           C  
ATOM   3848  O   GLU B 910      41.717 -18.123  49.080  1.00 29.42           O  
ATOM   3849  CB  GLU B 910      43.263 -17.899  46.232  1.00 33.80           C  
ATOM   3850  CG  GLU B 910      42.847 -17.501  44.833  1.00 43.94           C  
ATOM   3851  CD  GLU B 910      41.330 -17.445  44.670  1.00 52.53           C  
ATOM   3852  OE1 GLU B 910      40.655 -18.437  45.032  1.00 47.89           O  
ATOM   3853  OE2 GLU B 910      40.815 -16.410  44.181  1.00 52.31           O  
ATOM   3854  N   SER B 911      43.847 -17.490  49.415  1.00 26.89           N  
ATOM   3855  CA  SER B 911      43.928 -18.107  50.738  1.00 26.98           C  
ATOM   3856  C   SER B 911      43.352 -17.238  51.848  1.00 23.77           C  
ATOM   3857  O   SER B 911      43.332 -17.670  53.007  1.00 22.10           O  
ATOM   3858  CB  SER B 911      45.379 -18.432  51.071  1.00 28.04           C  
ATOM   3859  OG  SER B 911      46.093 -17.222  51.252  1.00 34.09           O  
ATOM   3860  N   SER B 912      42.902 -16.022  51.534  1.00 23.62           N  
ATOM   3861  CA  SER B 912      42.342 -15.115  52.538  1.00 22.23           C  
ATOM   3862  C   SER B 912      40.840 -15.366  52.593  1.00 26.32           C  
ATOM   3863  O   SER B 912      40.036 -14.676  51.963  1.00 22.65           O  
ATOM   3864  CB  SER B 912      42.667 -13.663  52.194  1.00 20.33           C  
ATOM   3865  OG  SER B 912      42.471 -12.818  53.311  1.00 22.05           O  
ATOM   3866  N   LYS B 913      40.464 -16.405  53.334  1.00 19.60           N  
ATOM   3867  CA  LYS B 913      39.073 -16.835  53.360  1.00 21.53           C  
ATOM   3868  C   LYS B 913      38.773 -17.531  54.678  1.00 23.97           C  
ATOM   3869  O   LYS B 913      39.671 -18.043  55.359  1.00 23.08           O  
ATOM   3870  CB  LYS B 913      38.752 -17.776  52.195  1.00 19.49           C  
ATOM   3871  CG  LYS B 913      39.624 -19.046  52.165  1.00 25.95           C  
ATOM   3872  CD  LYS B 913      39.310 -19.895  50.960  1.00 26.80           C  
ATOM   3873  CE  LYS B 913      40.300 -21.046  50.829  1.00 32.13           C  
ATOM   3874  NZ  LYS B 913      39.863 -21.980  49.771  1.00 40.86           N  
ATOM   3875  N   ILE B 914      37.486 -17.557  55.019  1.00 21.60           N  
ATOM   3876  CA  ILE B 914      36.967 -18.306  56.159  1.00 20.10           C  
ATOM   3877  C   ILE B 914      35.749 -19.076  55.677  1.00 24.89           C  
ATOM   3878  O   ILE B 914      34.854 -18.494  55.052  1.00 20.21           O  
ATOM   3879  CB  ILE B 914      36.592 -17.390  57.339  1.00 22.34           C  
ATOM   3880  CG1 ILE B 914      37.817 -16.606  57.826  1.00 20.64           C  
ATOM   3881  CG2 ILE B 914      35.919 -18.192  58.467  1.00 21.06           C  
ATOM   3882  CD1 ILE B 914      37.501 -15.497  58.787  1.00 23.44           C  
ATOM   3883  N   GLU B 915      35.716 -20.380  55.949  1.00 19.91           N  
ATOM   3884  CA  GLU B 915      34.565 -21.209  55.608  1.00 19.45           C  
ATOM   3885  C   GLU B 915      33.931 -21.772  56.875  1.00 23.41           C  
ATOM   3886  O   GLU B 915      34.624 -22.332  57.730  1.00 21.07           O  
ATOM   3887  CB  GLU B 915      34.968 -22.344  54.660  1.00 23.96           C  
ATOM   3888  CG  GLU B 915      33.807 -23.250  54.264  1.00 24.39           C  
ATOM   3889  CD  GLU B 915      34.125 -24.162  53.083  1.00 37.45           C  
ATOM   3890  OE1 GLU B 915      35.237 -24.726  53.048  1.00 40.10           O  
ATOM   3891  OE2 GLU B 915      33.258 -24.310  52.187  1.00 40.45           O  
ATOM   3892  N   VAL B 916      32.615 -21.621  57.001  1.00 19.63           N  
ATOM   3893  CA  VAL B 916      31.860 -22.213  58.098  1.00 18.24           C  
ATOM   3894  C   VAL B 916      31.149 -23.449  57.564  1.00 25.49           C  
ATOM   3895  O   VAL B 916      30.440 -23.374  56.553  1.00 21.19           O  
ATOM   3896  CB  VAL B 916      30.852 -21.208  58.684  1.00 23.61           C  
ATOM   3897  CG1 VAL B 916      30.065 -21.827  59.834  1.00 23.21           C  
ATOM   3898  CG2 VAL B 916      31.557 -19.932  59.134  1.00 22.13           C  
ATOM   3899  N   ILE B 917      31.355 -24.592  58.213  1.00 20.45           N  
ATOM   3900  CA  ILE B 917      30.590 -25.797  57.916  1.00 20.08           C  
ATOM   3901  C   ILE B 917      29.468 -25.845  58.939  1.00 20.75           C  
ATOM   3902  O   ILE B 917      29.706 -26.106  60.123  1.00 22.29           O  
ATOM   3903  CB  ILE B 917      31.448 -27.067  57.980  1.00 23.18           C  
ATOM   3904  CG1 ILE B 917      32.765 -26.876  57.235  1.00 25.71           C  
ATOM   3905  CG2 ILE B 917      30.659 -28.259  57.435  1.00 25.17           C  
ATOM   3906  CD1 ILE B 917      32.597 -26.675  55.758  1.00 28.59           C  
ATOM   3907  N   LEU B 918      28.249 -25.584  58.493  1.00 19.59           N  
ATOM   3908  CA  LEU B 918      27.139 -25.413  59.416  1.00 18.87           C  
ATOM   3909  C   LEU B 918      26.703 -26.736  60.036  1.00 20.02           C  
ATOM   3910  O   LEU B 918      26.657 -27.775  59.367  1.00 18.58           O  
ATOM   3911  CB  LEU B 918      25.950 -24.780  58.691  1.00 20.92           C  
ATOM   3912  CG  LEU B 918      26.101 -23.301  58.303  1.00 22.48           C  
ATOM   3913  CD1 LEU B 918      24.921 -22.851  57.445  1.00 22.06           C  
ATOM   3914  CD2 LEU B 918      26.225 -22.426  59.557  1.00 21.49           C  
ATOM   3915  N   ASN B 919      26.394 -26.684  61.329  1.00 21.56           N  
ATOM   3916  CA  ASN B 919      25.546 -27.681  61.969  1.00 24.47           C  
ATOM   3917  C   ASN B 919      24.374 -28.012  61.054  1.00 25.78           C  
ATOM   3918  O   ASN B 919      23.656 -27.119  60.597  1.00 21.07           O  
ATOM   3919  CB  ASN B 919      25.042 -27.132  63.310  1.00 21.68           C  
ATOM   3920  CG  ASN B 919      24.160 -28.115  64.053  1.00 23.89           C  
ATOM   3921  OD1 ASN B 919      23.064 -28.438  63.607  1.00 22.69           O  
ATOM   3922  ND2 ASN B 919      24.637 -28.589  65.201  1.00 23.21           N  
ATOM   3923  N   ASN B 920      24.196 -29.301  60.759  1.00 23.52           N  
ATOM   3924  CA  ASN B 920      23.203 -29.671  59.751  1.00 24.91           C  
ATOM   3925  C   ASN B 920      21.786 -29.289  60.149  1.00 22.51           C  
ATOM   3926  O   ASN B 920      20.942 -29.100  59.271  1.00 27.44           O  
ATOM   3927  CB  ASN B 920      23.305 -31.160  59.449  1.00 28.79           C  
ATOM   3928  CG  ASN B 920      24.660 -31.529  58.899  1.00 31.83           C  
ATOM   3929  OD1 ASN B 920      25.420 -32.265  59.526  1.00 43.54           O  
ATOM   3930  ND2 ASN B 920      24.988 -30.990  57.740  1.00 33.39           N  
ATOM   3931  N   GLY B 921      21.515 -29.127  61.439  1.00 22.39           N  
ATOM   3932  CA  GLY B 921      20.207 -28.707  61.883  1.00 22.28           C  
ATOM   3933  C   GLY B 921      19.875 -27.235  61.691  1.00 25.10           C  
ATOM   3934  O   GLY B 921      18.710 -26.871  61.859  1.00 25.73           O  
ATOM   3935  N   VAL B 922      20.838 -26.373  61.355  1.00 22.55           N  
ATOM   3936  CA  VAL B 922      20.557 -24.943  61.232  1.00 22.56           C  
ATOM   3937  C   VAL B 922      20.650 -24.446  59.799  1.00 23.23           C  
ATOM   3938  O   VAL B 922      20.471 -23.244  59.563  1.00 22.20           O  
ATOM   3939  CB  VAL B 922      21.462 -24.093  62.150  1.00 24.28           C  
ATOM   3940  CG1 VAL B 922      21.444 -24.637  63.573  1.00 29.72           C  
ATOM   3941  CG2 VAL B 922      22.884 -24.024  61.607  1.00 22.41           C  
ATOM   3942  N   ILE B 923      20.917 -25.327  58.834  1.00 20.22           N  
ATOM   3943  CA  ILE B 923      20.913 -24.927  57.433  1.00 25.44           C  
ATOM   3944  C   ILE B 923      19.529 -24.406  57.046  1.00 25.37           C  
ATOM   3945  O   ILE B 923      18.501 -24.957  57.454  1.00 22.29           O  
ATOM   3946  CB  ILE B 923      21.349 -26.123  56.569  1.00 22.75           C  
ATOM   3947  CG1 ILE B 923      22.827 -26.442  56.852  1.00 22.08           C  
ATOM   3948  CG2 ILE B 923      21.137 -25.852  55.090  1.00 20.92           C  
ATOM   3949  CD1 ILE B 923      23.270 -27.791  56.336  1.00 31.43           C  
ATOM   3950  N   TYR B 924      19.494 -23.329  56.264  1.00 19.53           N  
ATOM   3951  CA  TYR B 924      18.229 -22.678  55.919  1.00 20.08           C  
ATOM   3952  C   TYR B 924      17.636 -23.309  54.660  1.00 17.28           C  
ATOM   3953  O   TYR B 924      18.221 -23.227  53.577  1.00 18.34           O  
ATOM   3954  CB  TYR B 924      18.413 -21.167  55.730  1.00 18.26           C  
ATOM   3955  CG  TYR B 924      17.095 -20.423  55.611  1.00 17.55           C  
ATOM   3956  CD1 TYR B 924      16.431 -19.963  56.743  1.00 19.79           C  
ATOM   3957  CD2 TYR B 924      16.511 -20.197  54.376  1.00 19.44           C  
ATOM   3958  CE1 TYR B 924      15.208 -19.291  56.644  1.00 17.97           C  
ATOM   3959  CE2 TYR B 924      15.289 -19.511  54.261  1.00 18.53           C  
ATOM   3960  CZ  TYR B 924      14.650 -19.065  55.400  1.00 18.48           C  
ATOM   3961  OH  TYR B 924      13.440 -18.400  55.286  1.00 19.35           O  
ATOM   3962  N   ASN B 925      16.464 -23.929  54.799  1.00 16.22           N  
ATOM   3963  CA  ASN B 925      15.726 -24.470  53.656  1.00 17.41           C  
ATOM   3964  C   ASN B 925      14.259 -24.219  53.969  1.00 19.24           C  
ATOM   3965  O   ASN B 925      13.613 -25.039  54.627  1.00 17.98           O  
ATOM   3966  CB  ASN B 925      16.007 -25.954  53.435  1.00 17.68           C  
ATOM   3967  CG  ASN B 925      15.297 -26.498  52.209  1.00 18.91           C  
ATOM   3968  OD1 ASN B 925      14.594 -25.764  51.513  1.00 20.22           O  
ATOM   3969  ND2 ASN B 925      15.486 -27.789  51.927  1.00 15.92           N  
ATOM   3970  N   SER B 926      13.734 -23.089  53.500  1.00 17.94           N  
ATOM   3971  CA  SER B 926      12.438 -22.695  54.032  1.00 20.48           C  
ATOM   3972  C   SER B 926      11.767 -21.676  53.131  1.00 17.89           C  
ATOM   3973  O   SER B 926      12.426 -20.871  52.468  1.00 16.84           O  
ATOM   3974  CB  SER B 926      12.572 -22.101  55.436  1.00 19.22           C  
ATOM   3975  OG  SER B 926      11.296 -21.701  55.927  1.00 21.48           O  
ATOM   3976  N   MET B 927      10.441 -21.712  53.140  1.00 18.56           N  
ATOM   3977  CA AMET B 927       9.661 -20.655  52.520  0.27 17.95           C  
ATOM   3978  CA BMET B 927       9.647 -20.664  52.518  0.73 17.44           C  
ATOM   3979  C   MET B 927       9.103 -19.663  53.529  1.00 18.39           C  
ATOM   3980  O   MET B 927       8.844 -18.514  53.163  1.00 17.75           O  
ATOM   3981  CB AMET B 927       8.511 -21.254  51.703  0.27 17.92           C  
ATOM   3982  CB BMET B 927       8.492 -21.289  51.726  0.73 18.15           C  
ATOM   3983  CG AMET B 927       7.596 -20.219  51.079  0.27 18.58           C  
ATOM   3984  CG BMET B 927       7.693 -20.324  50.871  0.73 18.56           C  
ATOM   3985  SD AMET B 927       6.247 -20.961  50.170  0.27 20.25           S  
ATOM   3986  SD BMET B 927       6.737 -21.162  49.592  0.73 21.30           S  
ATOM   3987  CE AMET B 927       7.090 -21.451  48.679  0.27 17.41           C  
ATOM   3988  CE BMET B 927       5.659 -19.801  49.109  0.73 16.57           C  
ATOM   3989  N   TYR B 928       8.956 -20.054  54.800  1.00 17.48           N  
ATOM   3990  CA  TYR B 928       8.254 -19.210  55.748  1.00 17.97           C  
ATOM   3991  C   TYR B 928       9.038 -18.791  56.981  1.00 19.82           C  
ATOM   3992  O   TYR B 928       8.552 -17.928  57.711  1.00 17.26           O  
ATOM   3993  CB  TYR B 928       6.966 -19.915  56.216  1.00 18.89           C  
ATOM   3994  CG  TYR B 928       6.058 -20.307  55.085  1.00 15.70           C  
ATOM   3995  CD1 TYR B 928       5.477 -19.347  54.272  1.00 15.95           C  
ATOM   3996  CD2 TYR B 928       5.781 -21.656  54.823  1.00 19.73           C  
ATOM   3997  CE1 TYR B 928       4.641 -19.704  53.222  1.00 17.37           C  
ATOM   3998  CE2 TYR B 928       4.943 -22.025  53.789  1.00 14.73           C  
ATOM   3999  CZ  TYR B 928       4.369 -21.049  52.996  1.00 18.16           C  
ATOM   4000  OH  TYR B 928       3.528 -21.423  51.972  1.00 18.96           O  
ATOM   4001  N   GLU B 929      10.195 -19.386  57.269  1.00 17.44           N  
ATOM   4002  CA  GLU B 929      10.892 -19.088  58.516  1.00 20.40           C  
ATOM   4003  C   GLU B 929      11.669 -17.775  58.413  1.00 20.86           C  
ATOM   4004  O   GLU B 929      12.420 -17.564  57.459  1.00 16.55           O  
ATOM   4005  CB  GLU B 929      11.851 -20.219  58.881  1.00 22.34           C  
ATOM   4006  CG  GLU B 929      11.156 -21.571  58.983  1.00 35.39           C  
ATOM   4007  CD  GLU B 929      11.526 -22.324  60.235  1.00 50.81           C  
ATOM   4008  OE1 GLU B 929      10.783 -22.197  61.236  1.00 61.61           O  
ATOM   4009  OE2 GLU B 929      12.558 -23.036  60.217  1.00 52.38           O  
ATOM   4010  N   ASN B 930      11.530 -16.924  59.425  1.00 17.32           N  
ATOM   4011  CA  ASN B 930      12.257 -15.660  59.438  1.00 19.84           C  
ATOM   4012  C   ASN B 930      13.687 -15.900  59.914  1.00 19.47           C  
ATOM   4013  O   ASN B 930      13.966 -16.854  60.641  1.00 17.95           O  
ATOM   4014  CB  ASN B 930      11.563 -14.642  60.350  1.00 18.92           C  
ATOM   4015  CG  ASN B 930      10.138 -14.326  59.925  1.00 18.65           C  
ATOM   4016  OD1 ASN B 930       9.738 -14.563  58.796  1.00 19.07           O  
ATOM   4017  ND2 ASN B 930       9.368 -13.780  60.846  1.00 18.83           N  
ATOM   4018  N   PHE B 931      14.607 -15.037  59.486  1.00 17.34           N  
ATOM   4019  CA  PHE B 931      15.972 -15.152  59.988  1.00 18.74           C  
ATOM   4020  C   PHE B 931      16.665 -13.809  59.848  1.00 17.30           C  
ATOM   4021  O   PHE B 931      16.249 -12.966  59.055  1.00 15.87           O  
ATOM   4022  CB  PHE B 931      16.769 -16.252  59.269  1.00 19.10           C  
ATOM   4023  CG  PHE B 931      17.168 -15.921  57.848  1.00 18.81           C  
ATOM   4024  CD1 PHE B 931      16.251 -15.988  56.816  1.00 16.41           C  
ATOM   4025  CD2 PHE B 931      18.488 -15.601  57.545  1.00 21.13           C  
ATOM   4026  CE1 PHE B 931      16.630 -15.714  55.505  1.00 21.27           C  
ATOM   4027  CE2 PHE B 931      18.877 -15.328  56.242  1.00 18.94           C  
ATOM   4028  CZ  PHE B 931      17.954 -15.382  55.221  1.00 17.88           C  
ATOM   4029  N   SER B 932      17.743 -13.643  60.616  1.00 16.37           N  
ATOM   4030  CA  SER B 932      18.500 -12.397  60.655  1.00 14.25           C  
ATOM   4031  C   SER B 932      19.994 -12.703  60.662  1.00 16.11           C  
ATOM   4032  O   SER B 932      20.421 -13.808  61.009  1.00 16.47           O  
ATOM   4033  CB  SER B 932      18.136 -11.567  61.892  1.00 13.24           C  
ATOM   4034  OG  SER B 932      16.745 -11.336  61.950  1.00 14.51           O  
ATOM   4035  N   THR B 933      20.795 -11.704  60.285  1.00 16.96           N  
ATOM   4036  CA  THR B 933      22.243 -11.799  60.423  1.00 14.78           C  
ATOM   4037  C   THR B 933      22.766 -10.461  60.917  1.00 19.66           C  
ATOM   4038  O   THR B 933      22.155  -9.414  60.682  1.00 15.39           O  
ATOM   4039  CB  THR B 933      22.939 -12.218  59.105  1.00 18.14           C  
ATOM   4040  OG1 THR B 933      24.360 -12.305  59.308  1.00 22.65           O  
ATOM   4041  CG2 THR B 933      22.672 -11.221  57.953  1.00 17.32           C  
ATOM   4042  N   SER B 934      23.884 -10.503  61.635  1.00 19.02           N  
ATOM   4043  CA  SER B 934      24.542  -9.280  62.065  1.00 18.26           C  
ATOM   4044  C   SER B 934      26.049  -9.469  61.977  1.00 18.24           C  
ATOM   4045  O   SER B 934      26.568 -10.588  62.067  1.00 18.77           O  
ATOM   4046  CB  SER B 934      24.115  -8.862  63.492  1.00 16.47           C  
ATOM   4047  OG  SER B 934      24.635  -9.733  64.480  1.00 20.65           O  
ATOM   4048  N   PHE B 935      26.749  -8.364  61.761  1.00 17.48           N  
ATOM   4049  CA  PHE B 935      28.205  -8.388  61.698  1.00 16.35           C  
ATOM   4050  C   PHE B 935      28.681  -6.950  61.696  1.00 14.17           C  
ATOM   4051  O   PHE B 935      27.906  -6.030  61.435  1.00 17.41           O  
ATOM   4052  CB  PHE B 935      28.740  -9.135  60.462  1.00 15.94           C  
ATOM   4053  CG  PHE B 935      28.217  -8.613  59.142  1.00 17.70           C  
ATOM   4054  CD1 PHE B 935      27.060  -9.146  58.581  1.00 18.29           C  
ATOM   4055  CD2 PHE B 935      28.925  -7.643  58.426  1.00 17.84           C  
ATOM   4056  CE1 PHE B 935      26.578  -8.682  57.342  1.00 20.58           C  
ATOM   4057  CE2 PHE B 935      28.446  -7.167  57.192  1.00 18.93           C  
ATOM   4058  CZ  PHE B 935      27.271  -7.685  56.655  1.00 16.94           C  
ATOM   4059  N   TRP B 936      29.953  -6.770  62.033  1.00 16.22           N  
ATOM   4060  CA  TRP B 936      30.620  -5.480  61.933  1.00 17.27           C  
ATOM   4061  C   TRP B 936      31.600  -5.537  60.772  1.00 15.89           C  
ATOM   4062  O   TRP B 936      32.225  -6.572  60.535  1.00 17.91           O  
ATOM   4063  CB  TRP B 936      31.378  -5.130  63.211  1.00 16.81           C  
ATOM   4064  CG  TRP B 936      30.557  -5.014  64.442  1.00 17.73           C  
ATOM   4065  CD1 TRP B 936      29.891  -6.020  65.092  1.00 17.09           C  
ATOM   4066  CD2 TRP B 936      30.351  -3.829  65.214  1.00 17.92           C  
ATOM   4067  NE1 TRP B 936      29.268  -5.522  66.206  1.00 21.12           N  
ATOM   4068  CE2 TRP B 936      29.537  -4.182  66.310  1.00 19.13           C  
ATOM   4069  CE3 TRP B 936      30.759  -2.500  65.073  1.00 19.17           C  
ATOM   4070  CZ2 TRP B 936      29.120  -3.253  67.260  1.00 20.31           C  
ATOM   4071  CZ3 TRP B 936      30.352  -1.573  66.021  1.00 27.05           C  
ATOM   4072  CH2 TRP B 936      29.542  -1.954  67.103  1.00 23.11           C  
ATOM   4073  N   ILE B 937      31.744  -4.421  60.052  1.00 17.99           N  
ATOM   4074  CA  ILE B 937      32.579  -4.397  58.856  1.00 17.03           C  
ATOM   4075  C   ILE B 937      33.236  -3.028  58.765  1.00 13.39           C  
ATOM   4076  O   ILE B 937      32.674  -2.020  59.194  1.00 16.29           O  
ATOM   4077  CB  ILE B 937      31.770  -4.738  57.572  1.00 17.44           C  
ATOM   4078  CG1 ILE B 937      32.691  -4.920  56.362  1.00 16.37           C  
ATOM   4079  CG2 ILE B 937      30.745  -3.629  57.237  1.00 18.18           C  
ATOM   4080  CD1 ILE B 937      31.999  -5.546  55.141  1.00 15.68           C  
ATOM   4081  N   ARG B 938      34.443  -3.003  58.212  1.00 16.28           N  
ATOM   4082  CA  ARG B 938      35.156  -1.756  57.955  1.00 16.85           C  
ATOM   4083  C   ARG B 938      35.731  -1.841  56.549  1.00 20.57           C  
ATOM   4084  O   ARG B 938      36.546  -2.720  56.253  1.00 20.91           O  
ATOM   4085  CB  ARG B 938      36.256  -1.504  58.991  1.00 18.35           C  
ATOM   4086  CG  ARG B 938      36.836  -0.063  58.959  1.00 17.03           C  
ATOM   4087  CD  ARG B 938      37.524   0.295  60.282  1.00 15.75           C  
ATOM   4088  NE  ARG B 938      38.866  -0.277  60.397  1.00 19.92           N  
ATOM   4089  CZ  ARG B 938      39.974   0.310  59.937  1.00 22.43           C  
ATOM   4090  NH1 ARG B 938      39.901   1.488  59.322  1.00 19.22           N  
ATOM   4091  NH2 ARG B 938      41.156  -0.279  60.089  1.00 20.44           N  
ATOM   4092  N   ILE B 939      35.278  -0.951  55.683  1.00 16.73           N  
ATOM   4093  CA  ILE B 939      35.549  -0.983  54.251  1.00 14.87           C  
ATOM   4094  C   ILE B 939      36.467   0.193  53.936  1.00 14.81           C  
ATOM   4095  O   ILE B 939      36.091   1.339  54.191  1.00 16.93           O  
ATOM   4096  CB  ILE B 939      34.236  -0.894  53.447  1.00 16.21           C  
ATOM   4097  CG1 ILE B 939      33.347  -2.115  53.741  1.00 18.22           C  
ATOM   4098  CG2 ILE B 939      34.497  -0.798  51.953  1.00 15.54           C  
ATOM   4099  CD1 ILE B 939      31.887  -1.942  53.303  1.00 15.41           C  
ATOM   4100  N   PRO B 940      37.656  -0.031  53.387  1.00 17.05           N  
ATOM   4101  CA  PRO B 940      38.528   1.096  53.032  1.00 17.79           C  
ATOM   4102  C   PRO B 940      37.886   1.995  51.985  1.00 16.55           C  
ATOM   4103  O   PRO B 940      37.025   1.581  51.201  1.00 16.85           O  
ATOM   4104  CB  PRO B 940      39.788   0.424  52.463  1.00 19.24           C  
ATOM   4105  CG  PRO B 940      39.583  -1.058  52.606  1.00 22.34           C  
ATOM   4106  CD  PRO B 940      38.140  -1.319  52.877  1.00 16.86           C  
ATOM   4107  N   LYS B 941      38.330   3.251  51.966  1.00 17.31           N  
ATOM   4108  CA  LYS B 941      37.909   4.156  50.905  1.00 17.58           C  
ATOM   4109  C   LYS B 941      38.226   3.550  49.544  1.00 19.51           C  
ATOM   4110  O   LYS B 941      39.252   2.891  49.365  1.00 19.25           O  
ATOM   4111  CB  LYS B 941      38.602   5.520  51.061  1.00 18.66           C  
ATOM   4112  CG  LYS B 941      38.133   6.560  50.058  1.00 19.87           C  
ATOM   4113  CD  LYS B 941      38.165   7.948  50.661  1.00 21.09           C  
ATOM   4114  CE  LYS B 941      39.541   8.499  50.656  1.00 23.05           C  
ATOM   4115  NZ  LYS B 941      39.652   9.820  51.401  1.00 21.99           N  
ATOM   4116  N   TYR B 942      37.316   3.739  48.592  1.00 14.36           N  
ATOM   4117  CA  TYR B 942      37.568   3.348  47.215  1.00 16.82           C  
ATOM   4118  C   TYR B 942      38.360   4.449  46.511  1.00 21.21           C  
ATOM   4119  O   TYR B 942      37.950   5.615  46.506  1.00 17.82           O  
ATOM   4120  CB  TYR B 942      36.255   3.083  46.482  1.00 16.06           C  
ATOM   4121  CG  TYR B 942      35.555   1.778  46.869  1.00 16.02           C  
ATOM   4122  CD1 TYR B 942      35.877   0.570  46.240  1.00 16.46           C  
ATOM   4123  CD2 TYR B 942      34.571   1.766  47.842  1.00 17.54           C  
ATOM   4124  CE1 TYR B 942      35.222  -0.619  46.575  1.00 16.35           C  
ATOM   4125  CE2 TYR B 942      33.921   0.581  48.205  1.00 13.93           C  
ATOM   4126  CZ  TYR B 942      34.250  -0.602  47.564  1.00 16.44           C  
ATOM   4127  OH  TYR B 942      33.594  -1.767  47.907  1.00 17.57           O  
ATOM   4128  N   PHE B 943      39.493   4.076  45.920  1.00 19.49           N  
ATOM   4129  CA  PHE B 943      40.404   5.023  45.296  1.00 23.99           C  
ATOM   4130  C   PHE B 943      40.300   5.034  43.783  1.00 21.74           C  
ATOM   4131  O   PHE B 943      40.905   5.893  43.144  1.00 25.55           O  
ATOM   4132  CB  PHE B 943      41.852   4.707  45.703  1.00 22.52           C  
ATOM   4133  CG  PHE B 943      42.107   4.878  47.159  1.00 24.29           C  
ATOM   4134  CD1 PHE B 943      42.113   6.135  47.722  1.00 31.00           C  
ATOM   4135  CD2 PHE B 943      42.327   3.785  47.974  1.00 33.16           C  
ATOM   4136  CE1 PHE B 943      42.341   6.306  49.080  1.00 29.34           C  
ATOM   4137  CE2 PHE B 943      42.552   3.957  49.341  1.00 31.11           C  
ATOM   4138  CZ  PHE B 943      42.551   5.214  49.882  1.00 27.38           C  
ATOM   4139  N   ARG B 944      39.564   4.094  43.206  1.00 21.42           N  
ATOM   4140  CA  ARG B 944      39.392   3.989  41.770  1.00 25.18           C  
ATOM   4141  C   ARG B 944      38.074   3.280  41.544  1.00 25.86           C  
ATOM   4142  O   ARG B 944      37.537   2.648  42.456  1.00 23.72           O  
ATOM   4143  CB  ARG B 944      40.549   3.218  41.119  1.00 31.76           C  
ATOM   4144  CG  ARG B 944      40.621   1.758  41.553  1.00 31.10           C  
ATOM   4145  CD  ARG B 944      41.989   1.115  41.252  1.00 34.66           C  
ATOM   4146  NE  ARG B 944      43.054   1.770  42.002  1.00 39.18           N  
ATOM   4147  CZ  ARG B 944      43.349   1.519  43.277  1.00 37.20           C  
ATOM   4148  NH1 ARG B 944      42.667   0.606  43.967  1.00 33.41           N  
ATOM   4149  NH2 ARG B 944      44.329   2.189  43.866  1.00 32.65           N  
ATOM   4150  N   ASN B 945      37.546   3.393  40.331  1.00 26.89           N  
ATOM   4151  CA  ASN B 945      36.311   2.684  40.039  1.00 25.56           C  
ATOM   4152  C   ASN B 945      36.559   1.180  40.029  1.00 29.03           C  
ATOM   4153  O   ASN B 945      37.691   0.712  39.862  1.00 31.56           O  
ATOM   4154  CB  ASN B 945      35.724   3.121  38.699  1.00 29.70           C  
ATOM   4155  CG  ASN B 945      34.988   4.437  38.792  1.00 28.68           C  
ATOM   4156  OD1 ASN B 945      35.284   5.370  38.054  1.00 33.22           O  
ATOM   4157  ND2 ASN B 945      34.032   4.526  39.715  1.00 24.10           N  
ATOM   4158  N   ILE B 946      35.493   0.416  40.244  1.00 26.93           N  
ATOM   4159  CA  ILE B 946      35.593  -1.033  40.131  1.00 34.39           C  
ATOM   4160  C   ILE B 946      34.620  -1.513  39.065  1.00 39.56           C  
ATOM   4161  O   ILE B 946      33.550  -0.936  38.843  1.00 38.63           O  
ATOM   4162  CB  ILE B 946      35.354  -1.790  41.458  1.00 36.35           C  
ATOM   4163  CG1 ILE B 946      33.917  -1.636  41.947  1.00 28.60           C  
ATOM   4164  CG2 ILE B 946      36.339  -1.347  42.529  1.00 34.86           C  
ATOM   4165  CD1 ILE B 946      33.602  -2.633  43.041  1.00 25.21           C  
ATOM   4166  N   ASN B 947      35.020  -2.600  38.412  1.00 32.69           N  
ATOM   4167  CA  ASN B 947      34.317  -3.096  37.239  1.00 42.42           C  
ATOM   4168  C   ASN B 947      32.976  -3.712  37.611  1.00 42.64           C  
ATOM   4169  O   ASN B 947      31.984  -3.522  36.899  1.00 40.41           O  
ATOM   4170  CB  ASN B 947      35.212  -4.112  36.520  1.00 49.77           C  
ATOM   4171  CG  ASN B 947      34.610  -4.627  35.230  1.00 56.36           C  
ATOM   4172  OD1 ASN B 947      34.351  -5.826  35.091  1.00 57.59           O  
ATOM   4173  ND2 ASN B 947      34.397  -3.729  34.270  1.00 52.25           N  
ATOM   4174  N   ASN B 948      32.915  -4.449  38.721  1.00 31.77           N  
ATOM   4175  CA  ASN B 948      31.662  -5.100  39.060  1.00 36.73           C  
ATOM   4176  C   ASN B 948      31.543  -5.322  40.562  1.00 25.38           C  
ATOM   4177  O   ASN B 948      32.520  -5.276  41.309  1.00 27.36           O  
ATOM   4178  CB  ASN B 948      31.499  -6.429  38.310  1.00 37.55           C  
ATOM   4179  CG  ASN B 948      32.679  -7.359  38.505  1.00 40.47           C  
ATOM   4180  OD1 ASN B 948      33.718  -7.201  37.867  1.00 44.85           O  
ATOM   4181  ND2 ASN B 948      32.523  -8.339  39.386  1.00 43.14           N  
ATOM   4182  N   GLU B 949      30.300  -5.523  40.980  1.00 23.66           N  
ATOM   4183  CA  GLU B 949      29.979  -5.977  42.322  1.00 23.70           C  
ATOM   4184  C   GLU B 949      30.708  -7.285  42.636  1.00 21.74           C  
ATOM   4185  O   GLU B 949      30.818  -8.170  41.785  1.00 27.19           O  
ATOM   4186  CB  GLU B 949      28.460  -6.144  42.393  1.00 20.45           C  
ATOM   4187  CG  GLU B 949      27.897  -6.887  43.537  1.00 22.20           C  
ATOM   4188  CD  GLU B 949      26.374  -6.982  43.425  1.00 32.93           C  
ATOM   4189  OE1 GLU B 949      25.787  -6.217  42.629  1.00 41.22           O  
ATOM   4190  OE2 GLU B 949      25.767  -7.811  44.130  1.00 28.45           O  
ATOM   4191  N   TYR B 950      31.213  -7.407  43.865  1.00 19.18           N  
ATOM   4192  CA  TYR B 950      31.935  -8.602  44.286  1.00 19.32           C  
ATOM   4193  C   TYR B 950      31.355  -9.155  45.582  1.00 17.02           C  
ATOM   4194  O   TYR B 950      31.012  -8.397  46.492  1.00 16.86           O  
ATOM   4195  CB  TYR B 950      33.473  -8.312  44.443  1.00 17.52           C  
ATOM   4196  CG  TYR B 950      33.859  -7.175  45.371  1.00 20.09           C  
ATOM   4197  CD1 TYR B 950      33.757  -5.842  44.965  1.00 19.68           C  
ATOM   4198  CD2 TYR B 950      34.375  -7.430  46.640  1.00 16.57           C  
ATOM   4199  CE1 TYR B 950      34.128  -4.799  45.809  1.00 17.98           C  
ATOM   4200  CE2 TYR B 950      34.753  -6.399  47.482  1.00 18.40           C  
ATOM   4201  CZ  TYR B 950      34.618  -5.077  47.061  1.00 17.30           C  
ATOM   4202  OH  TYR B 950      34.986  -4.048  47.898  1.00 19.24           O  
ATOM   4203  N   LYS B 951      31.240 -10.484  45.666  1.00 18.30           N  
ATOM   4204  CA  LYS B 951      30.734 -11.104  46.892  1.00 19.46           C  
ATOM   4205  C   LYS B 951      31.757 -10.995  48.013  1.00 17.75           C  
ATOM   4206  O   LYS B 951      32.967 -11.010  47.769  1.00 20.46           O  
ATOM   4207  CB  LYS B 951      30.426 -12.586  46.662  1.00 21.88           C  
ATOM   4208  CG  LYS B 951      29.553 -12.871  45.468  1.00 29.79           C  
ATOM   4209  CD  LYS B 951      29.537 -14.379  45.211  1.00 40.75           C  
ATOM   4210  CE  LYS B 951      29.135 -14.711  43.787  1.00 45.13           C  
ATOM   4211  NZ  LYS B 951      30.054 -15.743  43.220  1.00 52.10           N  
ATOM   4212  N   ILE B 952      31.269 -10.930  49.260  1.00 14.88           N  
ATOM   4213  CA  ILE B 952      32.156 -11.109  50.411  1.00 14.42           C  
ATOM   4214  C   ILE B 952      31.706 -12.211  51.369  1.00 17.92           C  
ATOM   4215  O   ILE B 952      32.543 -12.817  52.044  1.00 17.89           O  
ATOM   4216  CB  ILE B 952      32.355  -9.791  51.181  1.00 13.64           C  
ATOM   4217  CG1 ILE B 952      31.010  -9.173  51.588  1.00 15.98           C  
ATOM   4218  CG2 ILE B 952      33.174  -8.831  50.328  1.00 17.88           C  
ATOM   4219  CD1 ILE B 952      31.159  -8.048  52.632  1.00 16.10           C  
ATOM   4220  N   ILE B 953      30.397 -12.477  51.460  1.00 16.94           N  
ATOM   4221  CA  ILE B 953      29.865 -13.527  52.337  1.00 14.58           C  
ATOM   4222  C   ILE B 953      28.785 -14.269  51.567  1.00 17.84           C  
ATOM   4223  O   ILE B 953      27.786 -13.665  51.169  1.00 19.49           O  
ATOM   4224  CB  ILE B 953      29.265 -12.979  53.651  1.00 17.03           C  
ATOM   4225  CG1 ILE B 953      30.200 -11.968  54.326  1.00 16.42           C  
ATOM   4226  CG2 ILE B 953      28.896 -14.141  54.577  1.00 17.80           C  
ATOM   4227  CD1 ILE B 953      29.639 -11.340  55.605  1.00 20.76           C  
ATOM   4228  N   SER B 954      28.964 -15.571  51.364  1.00 16.43           N  
ATOM   4229  CA  SER B 954      28.125 -16.297  50.422  1.00 19.33           C  
ATOM   4230  C   SER B 954      27.594 -17.572  51.059  1.00 22.03           C  
ATOM   4231  O   SER B 954      28.371 -18.367  51.594  1.00 17.65           O  
ATOM   4232  CB  SER B 954      28.912 -16.625  49.139  1.00 21.19           C  
ATOM   4233  OG  SER B 954      28.098 -17.270  48.172  1.00 23.19           O  
ATOM   4234  N   CYS B 955      26.270 -17.764  50.989  1.00 16.03           N  
ATOM   4235  CA  CYS B 955      25.612 -18.993  51.437  1.00 19.60           C  
ATOM   4236  C   CYS B 955      24.603 -19.396  50.364  1.00 16.96           C  
ATOM   4237  O   CYS B 955      23.387 -19.327  50.572  1.00 16.82           O  
ATOM   4238  CB  CYS B 955      24.948 -18.813  52.791  1.00 16.32           C  
ATOM   4239  SG  CYS B 955      24.409 -20.370  53.547  1.00 19.87           S  
ATOM   4240  N   MET B 956      25.130 -19.790  49.207  1.00 19.94           N  
ATOM   4241  CA  MET B 956      24.368 -20.072  47.999  1.00 19.60           C  
ATOM   4242  C   MET B 956      24.698 -21.465  47.484  1.00 21.94           C  
ATOM   4243  O   MET B 956      25.857 -21.887  47.500  1.00 20.35           O  
ATOM   4244  CB  MET B 956      24.686 -19.062  46.879  1.00 23.67           C  
ATOM   4245  CG  MET B 956      24.307 -17.635  47.186  1.00 19.29           C  
ATOM   4246  SD  MET B 956      22.552 -17.388  46.877  1.00 23.47           S  
ATOM   4247  CE  MET B 956      22.449 -17.569  45.111  1.00 23.91           C  
ATOM   4248  N   GLN B 957      23.682 -22.163  47.008  1.00 19.35           N  
ATOM   4249  CA  GLN B 957      23.872 -23.426  46.309  1.00 22.49           C  
ATOM   4250  C   GLN B 957      22.816 -23.510  45.222  1.00 19.22           C  
ATOM   4251  O   GLN B 957      21.647 -23.189  45.467  1.00 18.82           O  
ATOM   4252  CB  GLN B 957      23.764 -24.627  47.269  1.00 19.11           C  
ATOM   4253  CG  GLN B 957      22.384 -24.805  47.949  1.00 25.66           C  
ATOM   4254  CD  GLN B 957      21.368 -25.566  47.082  1.00 28.58           C  
ATOM   4255  OE1 GLN B 957      21.724 -26.516  46.373  1.00 27.19           O  
ATOM   4256  NE2 GLN B 957      20.104 -25.144  47.129  1.00 20.87           N  
ATOM   4257  N   ASN B 958      23.220 -23.947  44.027  1.00 19.37           N  
ATOM   4258  CA  ASN B 958      22.293 -24.086  42.892  1.00 16.89           C  
ATOM   4259  C   ASN B 958      21.433 -22.833  42.710  1.00 19.85           C  
ATOM   4260  O   ASN B 958      20.230 -22.910  42.458  1.00 17.43           O  
ATOM   4261  CB  ASN B 958      21.413 -25.320  43.035  1.00 18.01           C  
ATOM   4262  CG  ASN B 958      22.198 -26.610  42.829  1.00 24.76           C  
ATOM   4263  OD1 ASN B 958      23.262 -26.591  42.235  1.00 28.25           O  
ATOM   4264  ND2 ASN B 958      21.668 -27.721  43.312  1.00 31.16           N  
ATOM   4265  N   ASN B 959      22.067 -21.674  42.845  1.00 16.92           N  
ATOM   4266  CA  ASN B 959      21.416 -20.378  42.618  1.00 21.34           C  
ATOM   4267  C   ASN B 959      20.287 -20.118  43.607  1.00 21.10           C  
ATOM   4268  O   ASN B 959      19.299 -19.479  43.258  1.00 21.12           O  
ATOM   4269  CB  ASN B 959      20.885 -20.265  41.187  1.00 22.38           C  
ATOM   4270  CG  ASN B 959      21.992 -20.221  40.168  1.00 26.74           C  
ATOM   4271  OD1 ASN B 959      22.937 -19.458  40.311  1.00 26.91           O  
ATOM   4272  ND2 ASN B 959      21.899 -21.063  39.157  1.00 26.10           N  
ATOM   4273  N   SER B 960      20.401 -20.619  44.838  1.00 17.18           N  
ATOM   4274  CA  SER B 960      19.447 -20.262  45.879  1.00 17.57           C  
ATOM   4275  C   SER B 960      20.209 -20.051  47.176  1.00 16.45           C  
ATOM   4276  O   SER B 960      21.246 -20.679  47.408  1.00 17.01           O  
ATOM   4277  CB  SER B 960      18.341 -21.326  46.062  1.00 15.42           C  
ATOM   4278  OG  SER B 960      17.371 -20.886  47.020  1.00 15.32           O  
ATOM   4279  N   GLY B 961      19.709 -19.127  47.999  1.00 15.26           N  
ATOM   4280  CA  GLY B 961      20.303 -18.860  49.300  1.00 13.60           C  
ATOM   4281  C   GLY B 961      20.443 -17.367  49.557  1.00 15.63           C  
ATOM   4282  O   GLY B 961      19.617 -16.583  49.081  1.00 18.25           O  
ATOM   4283  N   TRP B 962      21.451 -16.960  50.324  1.00 16.42           N  
ATOM   4284  CA  TRP B 962      21.666 -15.552  50.628  1.00 17.53           C  
ATOM   4285  C   TRP B 962      23.136 -15.212  50.435  1.00 15.10           C  
ATOM   4286  O   TRP B 962      24.005 -16.090  50.424  1.00 16.05           O  
ATOM   4287  CB  TRP B 962      21.219 -15.179  52.057  1.00 14.38           C  
ATOM   4288  CG  TRP B 962      21.878 -15.985  53.172  1.00 17.91           C  
ATOM   4289  CD1 TRP B 962      21.372 -17.095  53.783  1.00 17.57           C  
ATOM   4290  CD2 TRP B 962      23.149 -15.733  53.796  1.00 16.27           C  
ATOM   4291  NE1 TRP B 962      22.244 -17.547  54.749  1.00 17.35           N  
ATOM   4292  CE2 TRP B 962      23.340 -16.731  54.775  1.00 19.80           C  
ATOM   4293  CE3 TRP B 962      24.143 -14.761  53.625  1.00 19.47           C  
ATOM   4294  CZ2 TRP B 962      24.485 -16.792  55.569  1.00 17.42           C  
ATOM   4295  CZ3 TRP B 962      25.275 -14.827  54.411  1.00 19.42           C  
ATOM   4296  CH2 TRP B 962      25.436 -15.830  55.372  1.00 21.46           C  
ATOM   4297  N   GLU B 963      23.407 -13.913  50.309  1.00 16.83           N  
ATOM   4298  CA  GLU B 963      24.732 -13.450  49.917  1.00 17.85           C  
ATOM   4299  C   GLU B 963      24.875 -11.978  50.284  1.00 17.90           C  
ATOM   4300  O   GLU B 963      23.938 -11.201  50.108  1.00 17.92           O  
ATOM   4301  CB  GLU B 963      24.912 -13.646  48.411  1.00 23.99           C  
ATOM   4302  CG  GLU B 963      26.321 -13.671  47.910  1.00 26.46           C  
ATOM   4303  CD  GLU B 963      26.397 -14.429  46.595  1.00 36.73           C  
ATOM   4304  OE1 GLU B 963      25.793 -13.965  45.606  1.00 34.35           O  
ATOM   4305  OE2 GLU B 963      27.013 -15.518  46.573  1.00 37.46           O  
ATOM   4306  N   VAL B 964      26.036 -11.607  50.813  1.00 15.02           N  
ATOM   4307  CA  VAL B 964      26.412 -10.212  51.008  1.00 16.35           C  
ATOM   4308  C   VAL B 964      27.466  -9.875  49.963  1.00 18.04           C  
ATOM   4309  O   VAL B 964      28.434 -10.628  49.781  1.00 17.05           O  
ATOM   4310  CB  VAL B 964      26.953  -9.944  52.423  1.00 15.79           C  
ATOM   4311  CG1 VAL B 964      27.323  -8.455  52.578  1.00 14.46           C  
ATOM   4312  CG2 VAL B 964      25.944 -10.401  53.523  1.00 15.23           C  
ATOM   4313  N   SER B 965      27.277  -8.754  49.271  1.00 16.21           N  
ATOM   4314  CA  SER B 965      28.234  -8.321  48.266  1.00 16.19           C  
ATOM   4315  C   SER B 965      28.481  -6.822  48.436  1.00 15.96           C  
ATOM   4316  O   SER B 965      27.756  -6.123  49.152  1.00 16.07           O  
ATOM   4317  CB  SER B 965      27.755  -8.667  46.846  1.00 17.87           C  
ATOM   4318  OG  SER B 965      26.524  -8.037  46.537  1.00 22.07           O  
ATOM   4319  N   LEU B 966      29.557  -6.353  47.817  1.00 15.82           N  
ATOM   4320  CA  LEU B 966      29.935  -4.948  47.873  1.00 16.26           C  
ATOM   4321  C   LEU B 966      30.045  -4.419  46.455  1.00 15.43           C  
ATOM   4322  O   LEU B 966      30.242  -5.179  45.507  1.00 16.29           O  
ATOM   4323  CB  LEU B 966      31.278  -4.751  48.597  1.00 16.90           C  
ATOM   4324  CG  LEU B 966      31.426  -5.263  50.030  1.00 18.73           C  
ATOM   4325  CD1 LEU B 966      32.840  -4.958  50.548  1.00 15.52           C  
ATOM   4326  CD2 LEU B 966      30.405  -4.619  50.930  1.00 14.55           C  
ATOM   4327  N   ASN B 967      29.958  -3.096  46.321  1.00 15.70           N  
ATOM   4328  CA  ASN B 967      30.175  -2.455  45.032  1.00 17.74           C  
ATOM   4329  C   ASN B 967      30.555  -1.001  45.295  1.00 16.93           C  
ATOM   4330  O   ASN B 967      30.347  -0.475  46.388  1.00 17.02           O  
ATOM   4331  CB  ASN B 967      28.933  -2.549  44.127  1.00 18.09           C  
ATOM   4332  CG  ASN B 967      29.257  -2.349  42.635  1.00 19.54           C  
ATOM   4333  OD1 ASN B 967      30.408  -2.166  42.247  1.00 20.33           O  
ATOM   4334  ND2 ASN B 967      28.233  -2.397  41.806  1.00 22.41           N  
ATOM   4335  N   PHE B 968      31.122  -0.371  44.275  1.00 13.68           N  
ATOM   4336  CA  PHE B 968      31.382   1.066  44.274  1.00 12.94           C
[truncated: 263,899 more chars]
